# Supplementary material for: Lactic Acid Bacteria Convert Human Fibroblasts to Multipotent Cells
Source: PubMed Central journal article supplement (PMC3530539; doi:10.1371/journal.pone.0051866), 2012-12-26

## Supplementary Fig. 2

**A**

*Lactobacillus* (JCM1021)

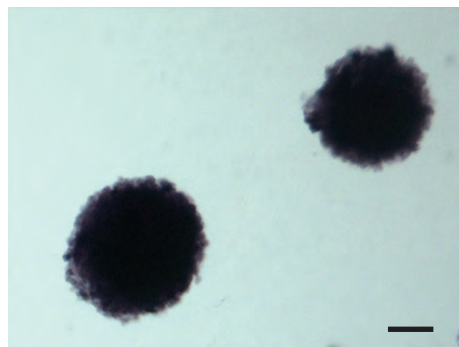

**B**

*Lactococcus* (JCM20101)

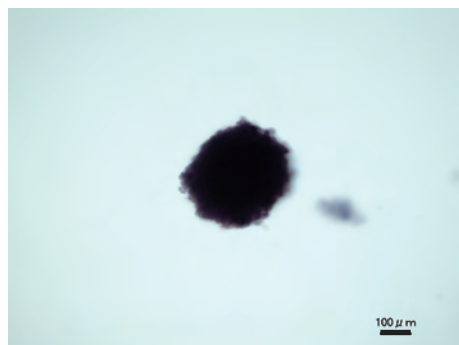

*Streptococcus* (JCM20026)

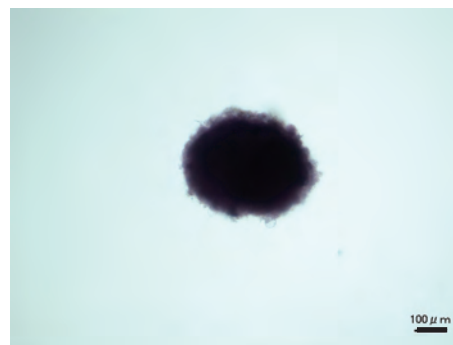

*Lactobacillus* sp. (JCM20061)

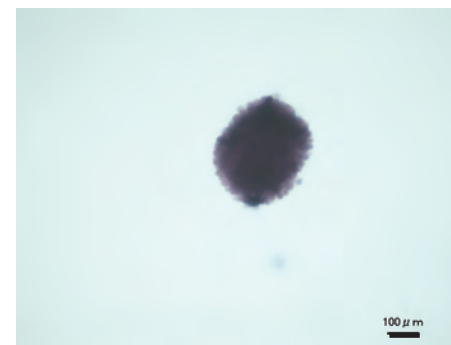

Supplement: pone.0051866.s002.pdf [file pone.0051866.s002.pdf]
