# Supplementary material for: Lactic Acid Bacteria Convert Human Fibroblasts to Multipotent Cells
Source: PubMed Central journal article supplement (PMC3530539; doi:10.1371/journal.pone.0051866), 2012-12-26

## Supplementary Fig. 6

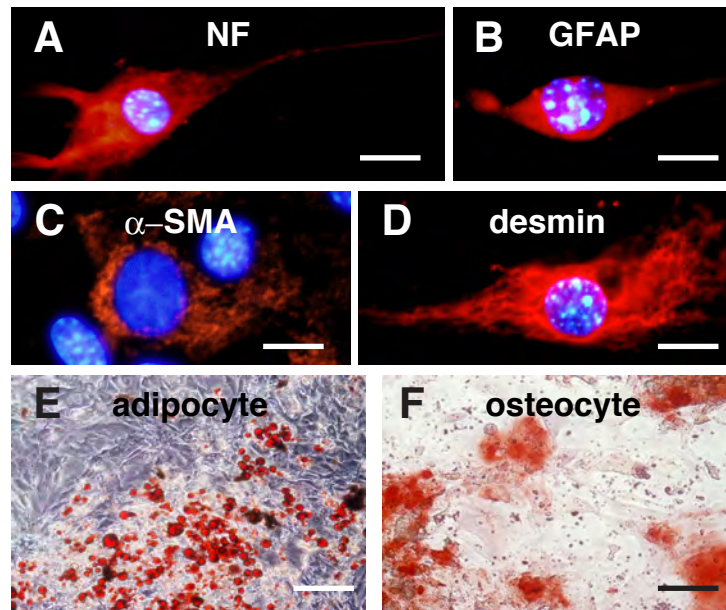

Supplement: pone.0051866.s006.pdf [file pone.0051866.s006.pdf]
