# Supplementary material for: Lactic Acid Bacteria Convert Human Fibroblasts to Multipotent Cells
Source: PubMed Central journal article supplement (PMC3530539; doi:10.1371/journal.pone.0051866), 2012-12-26

# Supplementary Fig. 7

**Adiocyte**

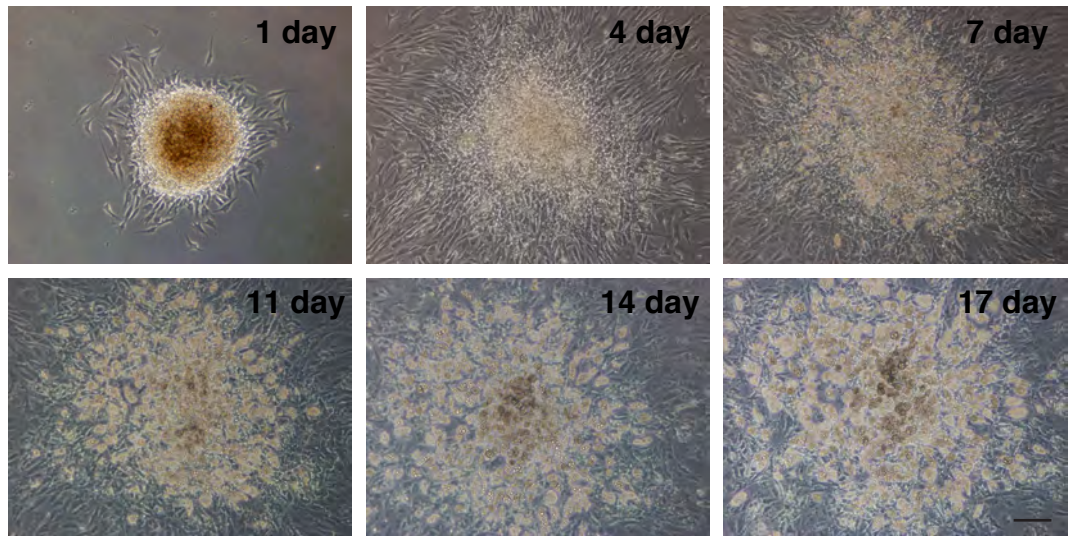

**Osteocyte**

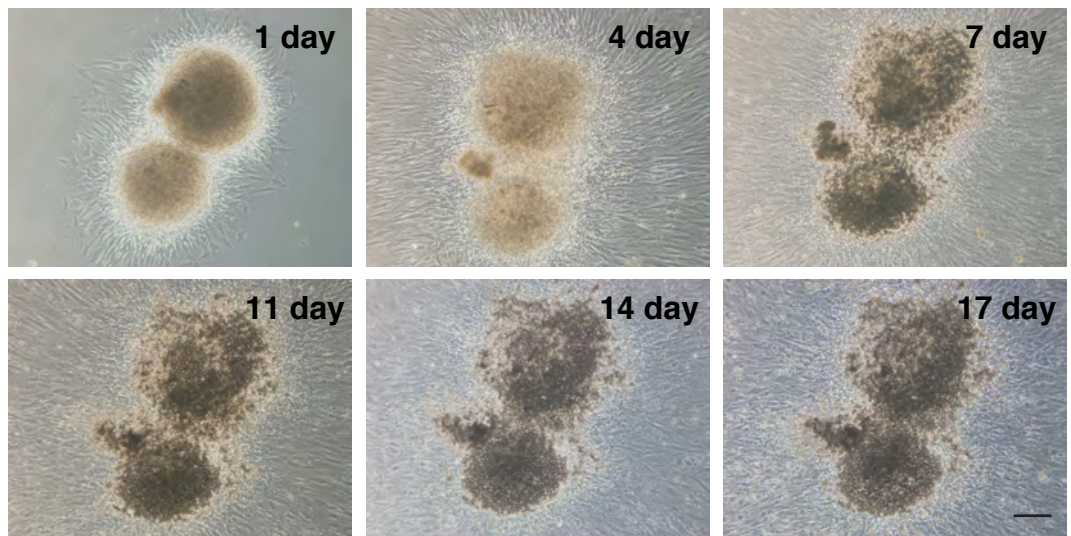

**Chondrocyte**

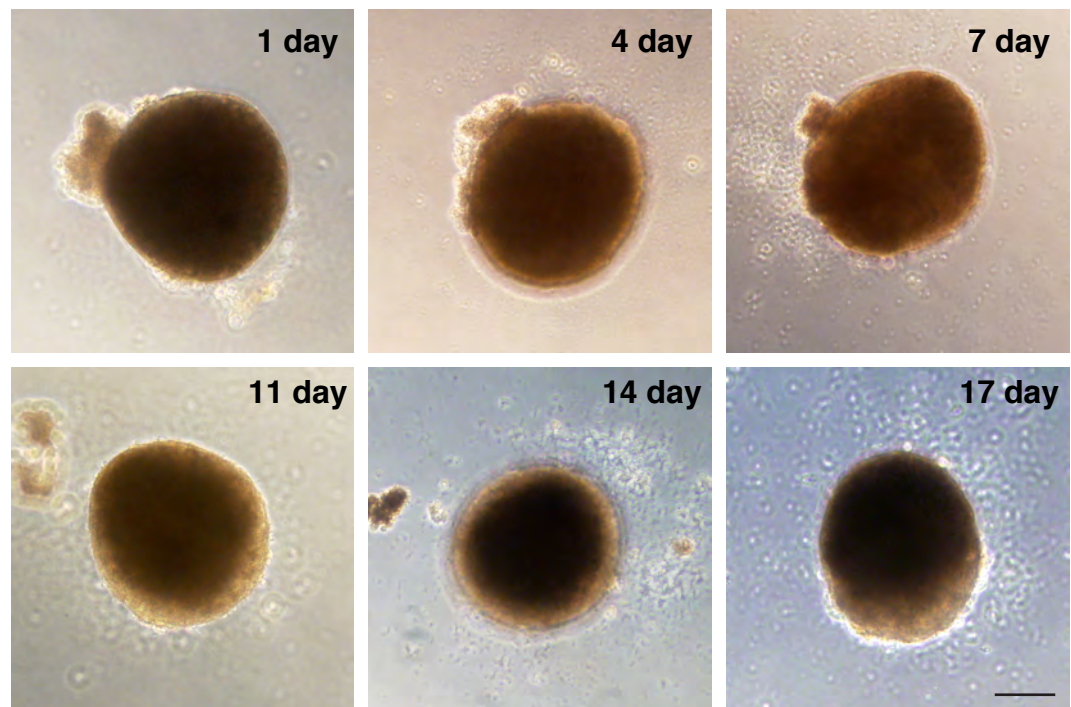

Supplement: pone.0051866.s007.pdf [file pone.0051866.s007.pdf]
