# Supplementary material for: Lactic Acid Bacteria Convert Human Fibroblasts to Multipotent Cells
Source: PubMed Central journal article supplement (PMC3530539; doi:10.1371/journal.pone.0051866), 2012-12-26
Supplement: pone.0051866.s011.pdf [file pone.0051866.s011.pdf]

List of 7580 genes that shows the difference by a factor of two or more between LAB-incorporated cell clusters-1vsHDF-1 &amp; LAB-incorporated cell clusters-2vsHDF-2

| no | ProbeName     | GeneSymbol | UniGeneID | GeneName                                                   | Description                                                                                                        | Fold change<br>[ LAB-inc. cells-1]vs[HDF-1] | Regulation<br>[ LAB-inc. cells-1]vs[HDF-2] | Fold change<br>[ LAB-inc. cells-2]vs[HDF-2] | Regulation<br>[ LAB-inc. cells-2]vs[HDF-2] | raw data<br>[ LAB-inc. cells-1] | raw data<br>[HDF-1] | raw data<br>[ LAB-inc. cells-2] | raw data<br>[HDF-2] | Flag<br>[ LAB-inc. cells-1] | Flag<br>[HDF-1] | Flag<br>[ LAB-inc. cells-2] | Flag<br>[HDF-2] |
|----|---------------|------------|-----------|------------------------------------------------------------|--------------------------------------------------------------------------------------------------------------------|---------------------------------------------|--------------------------------------------|---------------------------------------------|--------------------------------------------|---------------------------------|---------------------|---------------------------------|---------------------|-----------------------------|-----------------|-----------------------------|-----------------|
| 1  | A_23_P259314  | RPS4Y1     | Hs.282376 | ribosomal protein S4, Y-linked 1                           | Homo sapiens ribosomal protein S4, Y-linked 1 (RPS4Y1), mRNA [NM_001008]                                           | 18060.07600                                 | up                                         | 14754.83200                                 | up                                         | 54349.08200                     | 3.11606             | 43508.62500                     | 2.60020             | Detected                    | Compromised     | Detected                    | Compromised     |
| 2  | A_23_P324384  | RPS4Y2     | Hs.367761 | ribosomal protein S4, Y-linked 2                           | Homo sapiens ribosomal protein S4, Y-linked 2 (RPS4Y2), mRNA [NM_001039567]                                        | 4066.76780                                  | up                                         | 13989.86800                                 | up                                         | 44035.61000                     | 11.21212            | 40853.48400                     | 2.57502             | Detected                    | Compromised     | Detected                    | Compromised     |
| 3  | A_33_P3224331 | DDX3Y      | Hs.99120  | DEAD (Asp-Glu-Ala-Asp) box polypeptide 3, Y-linked         | Homo sapiens DEAD (Asp-Glu-Ala-Asp) box polypeptide 3, Y-linked (DDX3Y), transcript variant 1, mRNA [NM_001122685] | 1037.07930                                  | up                                         | 615.24634                                   | up                                         | 4161.63000                      | 4.15513             | 2590.18330                      | 3.71233             | Detected                    | Compromised     | Detected                    | Compromised     |
| 4  | A_24_P38290   | TAC1       | Hs.2563   | tachykinin, precursor 1                                    | Homo sapiens tachykinin, precursor 1 (TAC1), transcript variant beta, mRNA [NM_003182]                             | 686.36470                                   | up                                         | 444.92096                                   | up                                         | 2521.29250                      | 3.80366             | 1705.67370                      | 3.38048             | Detected                    | Compromised     | Detected                    | Compromised     |
| 5  | A_24_P291658  | ADH1A      | Hs.654433 | alcohol dehydrogenase 1A (class I), alpha polypeptide      | Homo sapiens alcohol dehydrogenase 1A (class I), alpha polypeptide (ADH1A), mRNA [NM_000667]                       | 571.48706                                   | up                                         | 841.44680                                   | up                                         | 5846.36330                      | 10.59284            | 3907.21220                      | 4.09455             | Detected                    | Compromised     | Detected                    | Compromised     |
| 6  | A_24_P11506   | KYNU       | Hs.470126 | kynureninase (L-kynurenine hydrolase)                      | Homo sapiens kynureninase (L-kynurenine hydrolase) (KYNU), transcript variant 2, mRNA [NM_001932998]               | 355.01260                                   | up                                         | 591.24176                                   | up                                         | 3616.03830                      | 10.54684            | 3028.44920                      | 4.51670             | Detected                    | Compromised     | Detected                    | Compromised     |
| 7  | A_23_P81158   | ADH1C      | Hs.654537 | alcohol dehydrogenase 1C (class I), gamma polypeptide      | Homo sapiens alcohol dehydrogenase 1C (class I), gamma polypeptide (ADH1C), mRNA [NM_000668]                       | 319.68158                                   | up                                         | 771.92334                                   | up                                         | 10654.07700                     | 34.50893            | 12332.11600                     | 14.08734            | Detected                    | Detected        | Detected                    | Detected        |
| 8  | A_24_P400324  | THSD7A     | Hs.120855 | thrombospondin, type I, domain containing 7A               | Homo sapiens thrombospondin, type I, domain containing 7A (THSD7A), mRNA [NM_015204]                               | 287.57077                                   | up                                         | 180.97974                                   | up                                         | 1179.51700                      | 4.24710             | 781.19403                       | 3.80622             | Detected                    | Compromised     | Detected                    | Compromised     |
| 9  | A_33_P3353737 | ADH1B      | Hs.4      | alcohol dehydrogenase 1B (class I), beta polypeptide       | Homo sapiens alcohol dehydrogenase 1B (class I), beta polypeptide (ADH1B), mRNA [NM_000668]                        | 212.37578                                   | up                                         | 114.41269                                   | up                                         | 665.44110                       | 3.24442             | 351.00528                       | 2.70523             | Detected                    | Compromised     | Detected                    | Compromised     |
| 10 | A_33_P3232965 | TDRD6      | Hs.656983 | tudor domain containing 6                                  | Homo sapiens tudor domain containing 6 (TDRD6), mRNA [NM_001010870]                                                | 201.56079                                   | up                                         | 137.27667                                   | up                                         | 746.39404                       | 3.83438             | 453.79120                       | 2.91491             | Detected                    | Compromised     | Detected                    | Compromised     |
| 11 | A_33_P3252809 |            |           |                                                            | Protein FAMI18A [Source:UniProtKB/Swiss-Prot;Acc:Q9NWS6] [ENST00000405673]                                         | 197.02629                                   | up                                         | 187.28546                                   | up                                         | 1307.81470                      | 6.87314             | 1139.50610                      | 5.36510             | Detected                    | Compromised     | Detected                    | Compromised     |
| 12 | A_23_P28334   | IL18RAP    | Hs.158315 | interleukin 18 receptor accessory protein                  | Homo sapiens interleukin 18 receptor accessory protein (IL18RAP), mRNA [NM_003853]                                 | 181.63411                                   | up                                         | 155.65323                                   | up                                         | 1391.98900                      | 7.93545             | 1164.60740                      | 6.59761             | Detected                    | Compromised     | Detected                    | Compromised     |
| 13 | A_24_P150580  | RASL12     | Hs.27018  | RAS-like, family 12                                        | Homo sapiens RAS-like, family 12 (RASL12), mRNA [NM_016563]                                                        | 174.26825                                   | up                                         | 96.89568                                    | up                                         | 1016.60394                      | 6.04048             | 965.77515                       | 8.78895             | Detected                    | Compromised     | Detected                    | Compromised     |
| 14 | A_33_P3379076 |            |           |                                                            |                                                                                                                    | 170.42334                                   | up                                         | 59.04181                                    | up                                         | 573.78625                       | 3.48621             | 577.58410                       | 8.62623             | Detected                    | Compromised     | Detected                    | Compromised     |
| 15 | A_33_P3339246 | LHX8       | Hs.403934 | LIM homeobox 8                                             | Homo sapiens LIM homeobox 8 (LHX8), mRNA [NM_001001933]                                                            | 164.66695                                   | up                                         | 102.12812                                   | up                                         | 503.34500                       | 3.16514             | 308.50230                       | 2.66366             | Detected                    | Compromised     | Detected                    | Compromised     |
| 16 | A_23_P214208  | CNR1       | Hs.709067 | cannabinoid receptor 1 (brain)                             | Homo sapiens cannabinoid receptor 1 (brain) (CNR1), transcript variant 2, mRNA [NM_033181]                         | 153.46800                                   | up                                         | 153.92642                                   | up                                         | 493.54886                       | 3.33001             | 440.57306                       | 2.52389             | Detected                    | Compromised     | Detected                    | Compromised     |
| 17 | A_23_P73848   | NCRNA00185 | Hs.138453 | non-protein coding RNA 185                                 | Homo sapiens non-protein coding RNA 185 (NCRNA00185), non-coding RNA [NR_001544]                                   | 148.06490                                   | up                                         | 134.41275                                   | up                                         | 427.09998                       | 2.98683             | 374.96707                       | 2.45991             | Detected                    | Compromised     | Detected                    | Compromised     |
| 18 | A_32_P35947   |            |           |                                                            |                                                                                                                    | 143.33679                                   | up                                         | 57.08913                                    | up                                         | 581.07090                       | 4.19764             | 703.69010                       | 10.86910            | Detected                    | Compromised     | Detected                    | Compromised     |
| 19 | A_23_P254944  | GSTT1      | Hs.288573 | glutathione S-transferase theta 1                          | Homo sapiens glutathione S-transferase theta 1 (GSTT1), mRNA [NM_000853]                                           | 141.92702                                   | up                                         | 163.10300                                   | up                                         | 1264.40190                      | 9.22472             | 1203.25990                      | 6.50523             | Detected                    | Compromised     | Detected                    | Compromised     |
| 20 | A_33_P3217700 | USP9Y      | Hs.598540 | ubiquitin specific peptidase 9, Y-linked                   | Homo sapiens ubiquitin specific peptidase 9, Y-linked (USP9Y), mRNA [NM_004654]                                    | 136.82297                                   | up                                         | 166.75487                                   | up                                         | 836.06976                       | 6.32727             | 605.62220                       | 3.20250             | Detected                    | Compromised     | Detected                    | Compromised     |
| 21 | A_24_P942743  | ZFY        | Hs.522845 | zinc finger protein, Y-linked                              | Homo sapiens zinc finger protein, Y-linked (ZFY), transcript variant 1, mRNA [NM_003411]                           | 123.99677                                   | up                                         | 112.68932                                   | up                                         | 386.42886                       | 3.22695             | 344.56055                       | 2.69618             | Detected                    | Compromised     | Detected                    | Compromised     |
| 22 | A_24_P33982   | C17orf60   | Hs.631749 | chromosome 17 open reading frame 60                        | Homo sapiens chromosome 17 open reading frame 60 (C17orf60), mRNA [NM_001085423]                                   | 112.69669                                   | up                                         | 68.35141                                    | up                                         | 798.46460                       | 7.33631             | 603.78030                       | 7.78927             | Detected                    | Compromised     | Detected                    | Compromised     |
| 23 | A_32_P8546    | C6orf176   |           | chromosome 6 open reading frame 176                        | Homo sapiens chromosome 6 open reading frame 176 (C6orf176), transcript variant 1, non-coding RNA [NR_026860]      | 110.78636                                   | up                                         | 104.23385                                   | up                                         | 362.18805                       | 3.38517             | 339.72490                       | 2.87398             | Detected                    | Compromised     | Detected                    | Compromised     |
| 24 | A_23_P106906  | PPL        | Hs.192233 | periplakin                                                 | Homo sapiens periplakin (PPL), mRNA [NM_002705]                                                                    | 109.77239                                   | up                                         | 169.79262                                   | up                                         | 2648.28200                      | 24.98068            | 2728.29690                      | 14.16897            | Detected                    | Detected        | Detected                    | Detected        |
| 25 | A_23_P96658   | CYorf15B   | Hs.592254 | chromosome Y open reading frame 15B                        | Homo sapiens chromosome Y open reading frame 15B (CYorf15B), mRNA [NM_032576]                                      | 108.38292                                   | up                                         | 73.16099                                    | up                                         | 350.89370                       | 3.35234             | 233.44202                       | 2.81362             | Detected                    | Compromised     | Detected                    | Compromised     |
| 26 | A_32_P53524   | NTN1       | Hs.660885 | netrin 1                                                   | Homo sapiens netrin 1 (NTN1), mRNA [NM_004822]                                                                     | 105.13181                                   | up                                         | 86.89350                                    | up                                         | 4960.21200                      | 48.85389            | 3970.34200                      | 40.29082            | Detected                    | Detected        | Detected                    | Detected        |
| 27 | A_33_P3234025 |            |           |                                                            | Putative uncharacterized protein C1orf196 [Source:UniProtKB/Swiss-Prot;Acc:J1AJZ1] [ENST00000401953]               | 98.42491                                    | up                                         | 40.55052                                    | up                                         | 306.80780                       | 3.22771             | 297.64487                       | 6.47243             | Detected                    | Compromised     | Detected                    | Compromised     |
| 28 | A_24_P330263  | EDNRB      | Hs.82002  | endothelin receptor type B                                 | Homo sapiens endothelin receptor type B (EDNRB), transcript variant 2, mRNA [NM_003991]                            | 96.93665                                    | up                                         | 36.39593                                    | up                                         | 455.31522                       | 4.86359             | 388.11847                       | 9.40323             | Detected                    | Compromised     | Detected                    | Compromised     |
| 29 | A_32_P167471  | CLMN       | Hs.301478 | calmin (calponin-like, transmembrane)                      | Homo sapiens calmin (calponin-like, transmembrane) (CLMN), mRNA [NM_024734]                                        | 92.82680                                    | up                                         | 68.86951                                    | up                                         | 323.90180                       | 3.61304             | 234.17175                       | 2.99829             | Detected                    | Compromised     | Detected                    | Compromised     |
| 30 | A_33_P3308347 | ADAMTS8    | Hs.271605 | ADAM metalloproteinase with thrombospondin type 1 motif, 8 | Homo sapiens ADAM metalloproteinase with thrombospondin type 1 motif, 8 (ADAMTS8), mRNA [NM_007037]                | 84.65422                                    | up                                         | 63.63633                                    | up                                         | 292.92110                       | 3.58290             | 238.65303                       | 3.30695             | Detected                    | Compromised     | Detected                    | Compromised     |

|    |               |            |           |                                                         |                                                                                                                                                |          |    |           |    |             |            |             |            |          |              |          |             |
|----|---------------|------------|-----------|---------------------------------------------------------|------------------------------------------------------------------------------------------------------------------------------------------------|----------|----|-----------|----|-------------|------------|-------------|------------|----------|--------------|----------|-------------|
| 31 | A_33_P3252281 | EYA4       | Hs.596680 | eyes absent homolog 4 (Drosophila)                      | Homo sapiens eyes absent homolog 4 (Drosophila) (EYA4), transcript variant 1, mRNA [NM_004100]                                                 | 79.30304 | up | 80.15833  | up | 547.71387   | 7.15150    | 282.40942   | 3.10668    | Detected | Compromised  | Detected | Compromised |
| 32 | A_23_P136777  | APOD       | Hs.522555 | apolipoprotein D                                        | Homo sapiens apolipoprotein D (APOD), mRNA [NM_001647]                                                                                         | 77.89092 | up | 51.44027  | up | 1574.38330  | 20.92940   | 1158.70530  | 19.86256   | Detected | Detected     | Detected | Detected    |
| 33 | A_23_P217277  | SLITRK2    | Hs.320368 | SLIT and NTRK-like family, member 2                     | Homo sapiens SLIT and NTRK-like family, member 2 (SLITRK2), transcript variant 1, mRNA [NM_032539]                                             | 77.83112 | up | 58.56053  | up | 296.35090   | 3.94263    | 232.92703   | 3.50736    | Detected | Compromised  | Detected | Compromised |
| 34 | A_23_P364792  | CYorf15A   | Hs.522863 | chromosome Y open reading frame 15A                     | Homo sapiens chromosome Y open reading frame 15A (CYorf15A), mRNA [NM_001005852]                                                               | 77.05311 | up | 21.94398  | up | 264.94186   | 3.56036    | 254.09647   | 10.21054   | Detected | Compromised  | Detected | Compromised |
| 35 | A_24_P237511  | EIF1AY     | Hs.461178 | eukaryotic translation initiation factor 1A, Y-linked   | Homo sapiens eukaryotic translation initiation factor 1A, Y-linked (EIF1AY), mRNA [NM_004681]                                                  | 75.00179 | up | 58.85675  | up | 297.78046   | 4.11110    | 239.38290   | 3.58643    | Detected | Compromised  | Detected | Compromised |
| 36 | A_23_P119943  | IGFBP2     | Hs.438102 | insulin-like growth factor binding protein 2, 36kDa     | Homo sapiens insulin-like growth factor binding protein 2, 36kDa (IGFBP2), mRNA [NM_000597]                                                    | 74.71652 | up | 72.95371  | up | 98704.35000 | 1367.89500 | 85870.87000 | 1037.92020 | Detected | Detected     | Detected | Detected    |
| 37 | A_24_P174793  | PCSK1      | Hs.78977  | proprotein convertase subtilisin/kexin type 1           | Homo sapiens proprotein convertase subtilisin/kexin type 1 (PCSK1), mRNA [NM_000439]                                                           | 69.55891 | up | 85.26331  | up | 2139.17900  | 31.84399   | 1470.16550  | 15.20441   | Detected | Detected     | Detected | Compromised |
| 38 | A_33_P3381666 | ABLIM2     | Hs.233404 | actin binding LIM protein family, member 2              | Homo sapiens actin binding LIM protein family, member 2 (ABLIM2), transcript variant 7, mRNA [NM_001130088]                                    | 68.62967 | up | 26.94885  | up | 281.47607   | 4.24681    | 265.85660   | 8.69907    | Detected | Compromised  | Detected | Compromised |
| 39 | A_23_P71880   | SPINK4     | Hs.555934 | serine peptidase inhibitor, Kazal type 4                | Homo sapiens serine peptidase inhibitor, Kazal type 4 (SPINK4), mRNA [NM_014471]                                                               | 67.98492 | up | 62.12992  | up | 201.07626   | 3.06254    | 180.89660   | 2.56741    | Detected | Compromised  | Detected | Compromised |
| 40 | A_33_P3366540 | CSGALNACT1 | Hs.613729 | chondroitin sulfate N-acetylgalactosaminyltransferase 1 | Homo sapiens chondroitin sulfate N-acetylgalactosaminyltransferase 1 (CSGALNACT1), transcript variant 1, mRNA [NM_001130518]                   | 66.61250 | up | 34.17123  | up | 213.92242   | 3.32532    | 366.23657   | 9.45076    | Detected | Compromised  | Detected | Compromised |
| 41 | A_23_P102000  | CXCR4      | Hs.593413 | chemokine (C-X-C motif) receptor 4                      | Homo sapiens chemokine (C-X-C motif) receptor 4 (CXCR4), transcript variant 1, mRNA [NM_001008540]                                             | 66.13092 | up | 194.85002 | up | 1326.76600  | 20.77413   | 994.89056   | 4.50236    | Detected | Not Detected | Detected | Compromised |
| 42 | A_23_P19333   | TREM1      | Hs.283022 | triggering receptor expressed on myeloid cells 1        | Homo sapiens triggering receptor expressed on myeloid cells 1 (TREM1), mRNA [NM_018643]                                                        | 63.95784 | up | 24.53825  | up | 411.24466   | 6.65794    | 396.14578   | 14.23564   | Detected | Compromised  | Detected | Detected    |
| 43 | A_33_P3258923 | MKRN3      | Hs.72964  | makorin ring finger protein 3                           | Homo sapiens makorin ring finger protein 3 (MKRN3), mRNA [NM_005664]                                                                           | 63.06924 | up | 45.81807  | up | 227.17850   | 3.72978    | 164.29243   | 3.16189    | Detected | Compromised  | Detected | Compromised |
| 44 | A_33_P3402091 | MERTK      | Hs.306178 | c-mer proto-oncogene tyrosine kinase                    | Homo sapiens c-mer proto-oncogene tyrosine kinase (MERTK), mRNA [NM_006343]                                                                    | 60.40837 | up | 24.94035  | up | 178.49197   | 3.05953    | 104.50090   | 3.69756    | Detected | Compromised  | Detected | Compromised |
| 45 | A_23_P382065  | EMCN       | Hs.152913 | endomucin                                               | Homo sapiens endomucin (EMCN), transcript variant 1, mRNA [NM_016242]                                                                          | 59.85459 | up | 79.65573  | up | 1237.75990  | 21.41273   | 994.08000   | 11.00449   | Detected | Detected     | Detected | Compromised |
| 46 | A_24_P6626    | TMEM132B   | Hs.524838 | transmembrane protein 132B                              | Homo sapiens transmembrane protein 132B (TMEM132B), mRNA [NM_052907]                                                                           | 59.73206 | up | 27.89287  | up | 468.37958   | 8.11939    | 309.51443   | 9.78483    | Detected | Compromised  | Detected | Compromised |
| 47 | A_33_P3219572 | LONRF3     |           | LON peptidase N-terminal domain and ring finger 3       | LON peptidase N-terminal domain and RING finger protein 3 (RING finger protein 127) [Source:UniProtKB/Swiss-Prot;Acc:Q496Y0] [ENS:00000365713] | 58.95693 | up | 44.92536  | up | 189.15330   | 3.32210    | 141.19566   | 2.77138    | Detected | Compromised  | Detected | Compromised |
| 48 | A_33_P3379106 | LOC283867  | Hs.444774 | hypothetical LOC283867                                  | Homo sapiens hypothetical LOC283867 (LOC283867), non-coding RNA [NR_027755]                                                                    | 57.61020 | up | 59.14799  | up | 311.24050   | 5.59410    | 204.82478   | 3.05357    | Detected | Compromised  | Detected | Compromised |
| 49 | A_23_P94103   | SCARA5     | Hs.591833 | scavenger receptor class A, member 5 (putative)         | Homo sapiens scavenger receptor class A, member 5 (putative) (SCARA5), mRNA [NM_173833]                                                        | 55.25531 | up | 60.53935  | up | 390.93230   | 7.32589    | 337.01797   | 4.90886    | Detected | Compromised  | Detected | Compromised |
| 50 | A_23_P110837  | IRX4       | Hs.196927 | iroquois homeobox 4                                     | Homo sapiens iroquois homeobox 4 (IRX4), mRNA [NM_016356]                                                                                      | 54.29953 | up | 49.93983  | up | 1106.68080  | 21.10374   | 989.28080   | 17.46779   | Detected | Not Detected | Detected | Detected    |
| 51 | A_32_P153812  | TMEM132B   | Hs.524838 | transmembrane protein 132B                              | Homo sapiens transmembrane protein 132B (TMEM132B), mRNA [NM_052907]                                                                           | 53.91463 | up | 57.11242  | up | 2151.39010  | 41.31860   | 1649.45290  | 25.46683   | Detected | Detected     | Detected | Detected    |
| 52 | A_33_P3252939 | MYLK4      | Hs.127830 | myosin light chain kinase family, member 4              | Homo sapiens myosin light chain kinase family, member 4 (MYLK4), mRNA [NM_001012418]                                                           | 51.44025 | up | 36.85075  | up | 179.17750   | 3.60673    | 119.96481   | 2.87060    | Detected | Compromised  | Detected | Compromised |
| 53 | A_23_P203972  | FZD10      | Hs.31664  | frizzled homolog 10 (Drosophila)                        | Homo sapiens frizzled homolog 10 (Drosophila) (FZD10), mRNA [NM_007197]                                                                        | 51.32589 | up | 130.12695 | up | 498.99650   | 10.06686   | 372.01550   | 2.52092    | Detected | Compromised  | Detected | Compromised |
| 54 | A_23_P51126   | IL1RL1     | Hs.66     | interleukin 1 receptor-like 1                           | Homo sapiens interleukin 1 receptor-like 1 (IL1RL1), transcript variant 1, mRNA [NM_016232]                                                    | 50.44381 | up | 64.04615  | up | 2127.36040  | 43.66830   | 1837.31930  | 25.29631   | Detected | Detected     | Detected | Detected    |
| 55 | A_23_P255672  | ABLIM2     | Hs.233404 | actin binding LIM protein family, member 2              | Homo sapiens actin binding LIM protein family, member 2 (ABLIM2), transcript variant 6, mRNA [NM_032432]                                       | 49.60078 | up | 55.43421  | up | 493.69733   | 10.30636   | 355.38593   | 5.65312    | Detected | Compromised  | Detected | Compromised |
| 56 | A_24_P51909   | CPLX1      | Hs.478930 | complexin 1                                             | Homo sapiens complexin 1 (CPLX1), mRNA [NM_006651]                                                                                             | 49.56390 | up | 42.50464  | up | 145.27829   | 3.03507    | 146.47609   | 3.03876    | Detected | Compromised  | Detected | Compromised |
| 57 | A_33_P3400578 | HLF        | Hs.196952 | hepatic leukemia factor                                 | Homo sapiens hepatic leukemia factor (HLF), mRNA [NM_002126]                                                                                   | 48.00860 | up | 30.80689  | up | 156.09073   | 3.36660    | 100.69540   | 2.88222    | Detected | Compromised  | Detected | Compromised |
| 58 | A_23_P372308  | RGMA       | Hs.271277 | RGM domain family, member A                             | Homo sapiens RGM domain family, member A (RGMA), transcript variant 4, mRNA [NM_020211]                                                        | 47.81368 | up | 36.64224  | up | 1537.38490  | 33.29382   | 837.68400   | 20.15876   | Detected | Detected     | Detected | Detected    |
| 59 | A_24_P32085   | MOBKLB2    | Hs.369022 | MOB1, Mps One Binder kinase activator-like 2B (yeast)   | Homo sapiens MOB1, Mps One Binder kinase activator-like 2B (yeast) (MOBKLB2), mRNA [NM_024761]                                                 | 46.96169 | up | 48.88302  | up | 754.67940   | 16.63994   | 427.45444   | 7.71076    | Detected | Compromised  | Detected | Compromised |
| 60 | A_23_P121441  | NLGN4Y     | Hs.439199 | neuroligin 4, Y-linked                                  | Homo sapiens neuroligin 4, Y-linked (NLGN4Y), transcript variant 1, mRNA [NM_014893]                                                           | 46.59098 | up | 38.02197  | up | 188.14577   | 4.18144    | 151.81349   | 3.52080    | Detected | Compromised  | Detected | Compromised |

|    |               |              |           |                                                                  |                                                                                                                                                                                                                                       |          |    |           |    |            |           |            |           |          |             |          |             |
|----|---------------|--------------|-----------|------------------------------------------------------------------|---------------------------------------------------------------------------------------------------------------------------------------------------------------------------------------------------------------------------------------|----------|----|-----------|----|------------|-----------|------------|-----------|----------|-------------|----------|-------------|
| 61 | A_33_P3347291 | INMT         | Hs.632629 | indolethylamine N-methyltransferase                              | Homo sapiens indolethylamine N-methyltransferase (INMT), mRNA [NM_006774]                                                                                                                                                             | 46.57341 | up | 194.73220 | up | 1179.10220 | 26.21479  | 955.78310  | 4.32800   | Detected | Detected    | Detected | Compromised |
| 62 | A_23_P63660   | C10orf58     | Hs.500333 | chromosome 10 open reading frame 58                              | Homo sapiens chromosome 10 open reading frame 58 (C10orf58), transcript variant 1, mRNA [NM_032333]                                                                                                                                   | 46.22512 | up | 44.27332  | up | 6211.44730 | 139.13866 | 5824.77300 | 116.01186 | Detected | Detected    | Detected | Detected    |
| 63 | A_23_P41804   | NKD2         | Hs.240951 | naked cuticle homolog 2 (Drosophila)                             | Homo sapiens naked cuticle homolog 2 (Drosophila) (NKD2), mRNA [NM_033120]                                                                                                                                                            | 45.72899 | up | 50.84110  | up | 1645.56700 | 37.26122  | 1397.77970 | 24.24316  | Detected | Detected    | Detected | Detected    |
| 64 | A_23_P55632   | SERPIN3      | Hs.227948 | serpin peptidase inhibitor, clade B (ovalbumin), member 3        | Homo sapiens serpin peptidase inhibitor, clade B (ovalbumin), member 3 (SERPIN3), mRNA [NM_006919]                                                                                                                                    | 44.67560 | up | 41.30827  | up | 162.06169  | 3.75615   | 155.98383  | 3.32972   | Detected | Compromised | Detected | Compromised |
| 65 | A_33_P3368193 | PNLIPRP3     | Hs.276724 | pancreatic lipase-related protein 3                              | Homo sapiens pancreatic lipase-related protein 3 (PNLIPRP3), mRNA [NM_001011709]                                                                                                                                                      | 43.85113 | up | 36.37052  | up | 280.34708  | 6.61985   | 203.79060  | 4.94083   | Detected | Compromised | Detected | Compromised |
| 66 | A_23_P32279   | BARX1        | Hs.164960 | BARX homeobox 1                                                  | Homo sapiens BARX homeobox 1 (BARX1), mRNA [NM_021570]                                                                                                                                                                                | 43.17076 | up | 36.02054  | up | 128.62550  | 3.08511   | 103.85482  | 2.54239   | Detected | Compromised | Detected | Compromised |
| 67 | A_23_P163216  | ATPB4        | Hs.511311 | ATPase, class I, type 8B, member 4                               | Homo sapiens ATPase, class I, type 8B, member 4 (ATPB4), mRNA [NM_024537]                                                                                                                                                             | 42.46031 | up | 33.17026  | up | 438.19717  | 10.68611  | 250.54417  | 6.66041   | Detected | Compromised | Detected | Compromised |
| 68 | A_23_P45999   | FBXO2        | Hs.132753 | F-box protein 2                                                  | Homo sapiens F-box protein 2 (FBXO2), mRNA [NM_012168]                                                                                                                                                                                | 41.53993 | up | 37.53362  | up | 4425.72500 | 110.31938 | 4584.95260 | 107.71592 | Detected | Detected    | Detected | Detected    |
| 69 | A_24_P579356  | ARHGAP28     | Hs.183114 | Rho GTPase activating protein 28                                 | Homo sapiens Rho GTPase activating protein 28 (ARHGAP28), transcript variant 1, mRNA [NM_001010000]                                                                                                                                   | 41.13934 | up | 28.78119  | up | 152.18360  | 3.83039   | 105.18620  | 3.22267   | Detected | Compromised | Detected | Compromised |
| 70 | A_33_P3276713 | HGF          | Hs.396530 | hepatocyte growth factor (hepapoietin A; scatter factor)         | Homo sapiens hepatocyte growth factor (hepapoietin A; scatter factor) (HGF), transcript variant 2, mRNA [NM_001010931]                                                                                                                | 40.99867 | up | 40.19474  | up | 1101.39330 | 27.81671  | 1136.79310 | 24.93893  | Detected | Detected    | Detected | Detected    |
| 71 | A_24_P497318  | LOC100129973 | Hs.564944 | hypothetical protein LOC100129973                                | Homo sapiens clone 23963 mRNA sequence [AF007131]                                                                                                                                                                                     | 40.14883 | up | 52.14708  | up | 247.13031  | 6.37362   | 157.09143  | 2.65637   | Detected | Compromised | Detected | Compromised |
| 72 | A_23_P146551  | MOBK2B       | Hs.369022 | MOB1, Mps One Binder kinase activator-like 2B (yeast)            | Homo sapiens MOB1, Mps One Binder kinase activator-like 2B (yeast) (MOBK2B), mRNA [NM_024761]                                                                                                                                         | 39.56636 | up | 26.27050  | up | 122.35542  | 3.20207   | 98.99301   | 3.32278   | Detected | Compromised | Detected | Compromised |
| 73 | A_33_P3251876 | IL18R1       | Hs.469521 | interleukin 18 receptor 1                                        | Homo sapiens interleukin 18 receptor 1 (IL18R1), mRNA [NM_003855]                                                                                                                                                                     | 39.03991 | up | 40.03226  | up | 140.94081  | 3.73819   | 141.96802  | 3.12713   | Detected | Compromised | Detected | Compromised |
| 74 | A_32_P100109  | REPS2        | Hs.186810 | RALBP1 associated Eps domain containing 2                        | Homo sapiens RALBP1 associated Eps domain containing 2 (REPS2), transcript variant 1, mRNA [NM_004726]                                                                                                                                | 38.63219 | up | 22.88877  | up | 133.74800  | 3.58485   | 77.76267   | 2.99581   | Detected | Compromised | Detected | Compromised |
| 75 | A_23_P102391  | SLC40A1      | Hs.643005 | solute carrier family 40 (iron-regulated transporter), member 1  | Homo sapiens solute carrier family 40 (iron-regulated transporter), member 1 (SLC40A1), mRNA [NM_014595]                                                                                                                              | 38.44627 | up | 29.83511  | up | 163.22023  | 4.39595   | 118.72677  | 3.50902   | Detected | Compromised | Detected | Compromised |
| 76 | A_24_P208567  | IL18R1       | Hs.469521 | interleukin 18 receptor 1                                        | Homo sapiens interleukin 18 receptor 1 (IL18R1), mRNA [NM_003855]                                                                                                                                                                     | 38.35930 | up | 45.17770  | up | 2480.25510 | 66.95126  | 1807.45400 | 35.27838  | Detected | Detected    | Detected | Detected    |
| 77 | A_33_P3228977 |              |           |                                                                  | Histone demethylase UTY (EC 1.14.11.1)-(Ubiquitously transcribed Y chromosome tetratricopeptide repeat protein)/(Ubiquitously transcribed TPR protein on the Y chromosome) [Source:UniProtKB/Swiss-Prot;Acc:O14607] [ENST00000382893] | 37.70444 | up | 26.93844  | up | 151.53046  | 4.16141   | 105.54459  | 3.45485   | Detected | Compromised | Detected | Compromised |
| 78 | A_32_P131640  | SLITRK4      | Hs.272284 | SLIT and NTRK-like family, member 4                              | Homo sapiens SLIT and NTRK-like family, member 4 (SLITRK4), mRNA [NM_173078]                                                                                                                                                          | 37.36375 | up | 23.44451  | up | 1426.11610 | 39.52187  | 1046.09900 | 39.34568  | Detected | Detected    | Detected | Detected    |
| 79 | A_23_P61406   | SHC3         | Hs.656806 | SHC (Src homology 2 domain containing) transforming protein 3    | Homo sapiens SHC (Src homology 2 domain containing) transforming protein 3 (SHC3), mRNA [NM_016848]                                                                                                                                   | 37.04697 | up | 31.46639  | up | 1888.98830 | 52.79705  | 1255.19140 | 35.17455  | Detected | Detected    | Detected | Detected    |
| 80 | A_23_P329835  | UTY          | Hs.115277 | ubiquitously transcribed tetratricopeptide repeat gene, Y-linked | Homo sapiens ubiquitously transcribed tetratricopeptide repeat gene, Y-linked (UTY), transcript variant 3, mRNA [NM_007125]                                                                                                           | 36.99965 | up | 17.47010  | up | 105.47289  | 2.95173   | 48.09137   | 2.42738   | Detected | Compromised | Detected | Compromised |
| 81 | A_24_P383609  | NANOS1       | Hs.591918 | nanos homolog 1 (Drosophila)                                     | Homo sapiens nanos homolog 1 (Drosophila) (NANOS1), mRNA [NM_199461]                                                                                                                                                                  | 36.86504 | up | 36.11005  | up | 3418.01980 | 96.00481  | 2713.12130 | 66.25317  | Detected | Detected    | Detected | Detected    |
| 82 | A_23_P41344   | EREG         | Hs.115263 | epiregulin                                                       | Homo sapiens epiregulin (EREG), mRNA [NM_001432]                                                                                                                                                                                      | 36.37867 | up | 40.60798  | up | 3908.62520 | 111.25263 | 3326.96340 | 72.24406  | Detected | Detected    | Detected | Detected    |
| 83 | A_24_P183664  | TRIL         | Hs.21572  | TLR4 interactor with leucine rich repeats                        | Homo sapiens TLR4 interactor with leucine rich repeats (TRIL), mRNA [NM_014817]                                                                                                                                                       | 36.16660 | up | 58.18153  | up | 660.81910  | 18.91943  | 446.87784  | 6.72822   | Detected | Compromised | Detected | Compromised |
| 84 | A_33_P3347697 | NOVA1        | Hs.31588  | neuro-oncological ventral antigen 1                              | Homo sapiens neuro-oncological ventral antigen 1 (NOVA1), transcript variant 1, mRNA [NM_002515]                                                                                                                                      | 35.99863 | up | 33.48424  | up | 3895.28740 | 112.04350 | 2550.43460 | 67.16443  | Detected | Detected    | Detected | Detected    |
| 85 | A_23_P5903    | SLC04A1      | Hs.235782 | solute carrier organic anion transporter family, member 4A1      | Homo sapiens solute carrier organic anion transporter family, member 4A1 (SLC04A1), mRNA [NM_016354]                                                                                                                                  | 35.69670 | up | 42.76345  | up | 328.30510  | 9.52320   | 306.34595  | 6.31691   | Detected | Compromised | Detected | Compromised |
| 86 | A_23_P135381  | SP5          | Hs.368802 | Sp5 transcription factor                                         | Homo sapiens Sp5 transcription factor (SP5), mRNA [NM_001003845]                                                                                                                                                                      | 35.15185 | up | 31.24466  | up | 113.03018  | 3.32950   | 98.87079   | 2.79035   | Detected | Compromised | Detected | Compromised |
| 87 | A_32_P15958   | C21orf121    | Hs.626078 | chromosome 21 open reading frame 121                             | Homo sapiens chromosome 21 open reading frame 121 (C21orf121), non-coding RNA [NR_027273]                                                                                                                                             | 34.90670 | up | 36.79043  | up | 103.47908  | 3.06957   | 106.39017  | 2.54995   | Detected | Compromised | Detected | Compromised |
| 88 | A_23_P253350  | C8orf4       | Hs.591849 | chromosome 8 open reading frame 4                                | Homo sapiens chromosome 8 open reading frame 4 (C8orf4), mRNA [NM_020130]                                                                                                                                                             | 34.03380 | up | 13.84523  | up | 257.75253  | 7.84198   | 173.23439  | 11.03315  | Detected | Compromised | Detected | Compromised |
| 89 | A_23_P134835  | CSGALNACT1   | Hs.613729 | chondroitin sulfate N-acetylgalactosaminyltransferase 1          | Homo sapiens chondroitin sulfate N-acetylgalactosaminyltransferase 1 (CSGALNACT1), transcript variant 2, mRNA [NM_018371]                                                                                                             | 34.03196 | up | 35.23470  | up | 3581.97270 | 108.98540 | 2820.94480 | 70.59753  | Detected | Detected    | Detected | Detected    |
| 90 | A_23_P17065   | CCL20        | Hs.75498  | chemokine (C-C motif) ligand 20                                  | Homo sapiens chemokine (C-C motif) ligand 20 (CCL20), transcript variant 1, mRNA [NM_004591]                                                                                                                                          | 33.94013 | up | 38.58477  | up | 891.41380  | 27.19563  | 593.61926  | 13.56618  | Detected | Detected    | Detected | Detected    |

|     |               |           |           |                                                                 |                                                                                                                                                                                                                      |          |    |          |    |             |           |             |           |          |             |          |             |
|-----|---------------|-----------|-----------|-----------------------------------------------------------------|----------------------------------------------------------------------------------------------------------------------------------------------------------------------------------------------------------------------|----------|----|----------|----|-------------|-----------|-------------|-----------|----------|-------------|----------|-------------|
| 91  | A_24_P326491  | MKX       | Hs.128193 | mohawk homeobox                                                 | Homo sapiens mohawk homeobox (MKX), mRNA [NM_173576]                                                                                                                                                                 | 33.22589 | up | 22.87169 | up | 155.40741   | 4.84315   | 110.28508   | 4.25191   | Detected | Compromised | Detected | Compromised |
| 92  | A_23_P5342    | LRP1B     | Hs.656461 | low density lipoprotein-related protein 1B (deleted in tumors)  | Homo sapiens low density lipoprotein-related protein 1B (deleted in tumors) (LRP1B), mRNA [NM_018557]                                                                                                                | 33.13724 | up | 39.84983 | up | 167.17760   | 5.22390   | 121.01801   | 2.67787   | Detected | Compromised | Detected | Compromised |
| 93  | A_23_P161458  | OLAH      | Hs.24309  | oleoyl-ACP hydrolase                                            | Homo sapiens oleoyl-ACP hydrolase (OLAH), transcript variant 2, mRNA [NM_001039702]                                                                                                                                  | 33.06666 | up | 33.34927 | up | 2227.14280  | 69.74142  | 1944.02030  | 51.40200  | Detected | Detected    | Detected | Detected    |
| 94  | A_33_P3400763 | PLIN4     | Hs.591387 | perilipin 4                                                     | Homo sapiens perilipin 4 (PLIN4), mRNA [NM_001080400]                                                                                                                                                                | 33.01618 | up | 34.24303 | up | 363.90515   | 11.41286  | 283.48096   | 7.29991   | Detected | Compromised | Detected | Compromised |
| 95  | A_23_P212105  | DAZL      | Hs.131179 | deleted in azoospermia-like                                     | Homo sapiens deleted in azoospermia-like (DAZL), mRNA [NM_001351]                                                                                                                                                    | 33.00124 | up | 29.00014 | up | 110.35501   | 3.46254   | 96.09358    | 2.92186   | Detected | Compromised | Detected | Compromised |
| 96  | A_32_P310335  | JAM2      | Hs.655065 | junctional adhesion molecule 2                                  | Junctional adhesion molecule B Precursor (JAM-B)/Junctional adhesion molecule 2 (Vascular endothelial junction-associated molecule)(VE-JAM/CD322 antigen) [Source:UniProtKB/Swiss-Prot;Acc:P57087] [ENST00000480456] | 32.73216 | up | 30.34047 | up | 202.03134   | 6.39112   | 157.40321   | 4.57464   | Detected | Compromised | Detected | Compromised |
| 97  | A_23_P73571   | MUM1L1    | Hs.592221 | melanoma associated antigen (mutated) 1-like 1                  | Homo sapiens melanoma associated antigen (mutated) 1-like 1 (MUM1L1), mRNA [NM_152423]                                                                                                                               | 32.66191 | up | 30.81178 | up | 99.31375    | 3.14848   | 91.74905    | 2.62573   | Detected | Compromised | Detected | Compromised |
| 98  | A_33_P3221458 | ZNF204    | Hs.8198   | zinc finger protein 204 pseudogene                              | Homo sapiens zinc finger protein 204 pseudogene (ZNF204), non-coding RNA [NR_027222]                                                                                                                                 | 32.52627 | up | 89.68151 | up | 402.69946   | 12.81976  | 253.62761   | 2.49379   | Detected | Compromised | Detected | Compromised |
| 99  | A_33_P3211634 | PP1L6     | Hs.32234  | peptidylprolyl isomerase (cyclophilin)-like 6                   | Homo sapiens peptidylprolyl isomerase (cyclophilin)-like 6 (PP1L6), transcript variant 1, mRNA [NM_173672]                                                                                                           | 32.42908 | up | 40.07022 | up | 159.21518   | 5.08374   | 137.91795   | 3.03504   | Detected | Compromised | Detected | Compromised |
| 100 | A_24_P220485  | OLFML2A   | Hs.357004 | olfactomedin-like 2A                                            | Homo sapiens olfactomedin-like 2A (OLFML2A), mRNA [NM_182487]                                                                                                                                                        | 31.84938 | up | 34.26382 | up | 7593.59700  | 246.87650 | 4915.97800  | 126.51431 | Detected | Detected    | Detected | Detected    |
| 101 | A_23_P131208  | NR4A2     | Hs.583344 | nuclear receptor subfamily 4, group A, member 2                 | Homo sapiens nuclear receptor subfamily 4, group A, member 2 (NR4A2), mRNA [NM_006186]                                                                                                                               | 31.49993 | up | 53.63770 | up | 1141.15920  | 37.51196  | 476.82245   | 7.83885   | Detected | Detected    | Detected | Compromised |
| 102 | A_33_P3248052 | NLGN4Y    | Hs.439199 | neuroligin 4, Y-linked                                          | Homo sapiens neuroligin 4, Y-linked (NLGN4Y), transcript variant 2, mRNA [NM_001164238]                                                                                                                              | 31.42489 | up | 26.34670 | up | 114.60700   | 3.77633   | 98.18084    | 3.28599   | Detected | Compromised | Detected | Compromised |
| 103 | A_23_P27229   | MYO15A    | Hs.462390 | myosin XVa                                                      | Homo sapiens myosin XVa (MYO15A), mRNA [NM_016239]                                                                                                                                                                   | 31.28414 | up | 10.33449 | up | 107.32022   | 3.55214   | 72.77074    | 6.20916   | Detected | Compromised | Detected | Compromised |
| 104 | A_33_P3479449 | LOC151438 | Hs.516245 | hypothetical protein LOC151438                                  | Homo sapiens cDNA FLJ31315 fis, clone LIVER1000303 [AK055877]                                                                                                                                                        | 31.08377 | up | 19.17067 | up | 98.46256    | 3.27998   | 71.40328    | 3.28433   | Detected | Compromised | Detected | Compromised |
| 105 | A_33_P3375566 |           | Hs.126160 |                                                                 | BX093647 Soares testis, NHT Homo sapiens cDNA clone IMAGE998F023561; IMAGE:1409665, mRNA sequence [BX093647]                                                                                                         | 30.45936 | up | 14.55300 | up | 109.08609   | 3.70836   | 92.31966    | 5.59381   | Detected | Compromised | Detected | Compromised |
| 106 | A_33_P3396214 | KREMEN2   | Hs.661128 | kriple containing transmembrane protein 2                       | Homo sapiens kriple containing transmembrane protein 2 (KREMEN2), transcript variant 4, mRNA [NM_172229]                                                                                                             | 30.24967 | up | 7.42596  | up | 104.14642   | 3.56498   | 93.47362    | 11.09947  | Detected | Compromised | Detected | Compromised |
| 107 | A_23_P66432   | TTYH2     | Hs.27935  | tweety homolog 2 (Drosophila)                                   | Homo sapiens tweety homolog 2 (Drosophila) (TTYH2), transcript variant 1, mRNA [NM_032646]                                                                                                                           | 30.17794 | up | 30.11486 | up | 142.92722   | 4.90409   | 96.84503    | 2.83571   | Detected | Compromised | Detected | Compromised |
| 108 | A_23_P85800   | CD52      | Hs.276770 | CD52 molecule                                                   | Homo sapiens CD52 molecule (CD52), mRNA [NM_001803]                                                                                                                                                                  | 29.96984 | up | 46.27201 | up | 507.29092   | 17.52693  | 446.61680   | 8.51103   | Detected | Compromised | Detected | Compromised |
| 109 | A_32_P133072  | SPON1     | Hs.643864 | spondin 1, extracellular matrix protein                         | Homo sapiens spondin 1, extracellular matrix protein (SPON1), mRNA [NM_006108]                                                                                                                                       | 29.46121 | up | 26.38959 | up | 7575.24760  | 266.24368 | 5809.44530  | 194.11876 | Detected | Detected    | Detected | Detected    |
| 110 | A_32_P197340  |           | Hs.443729 |                                                                 | Uncharacterized protein LOC285141 [Source:UniProtKB/Swiss-Prot;Acc:A1L162] [ENST00000375280]                                                                                                                         | 29.08856 | up | 15.63092 | up | 670.04670   | 23.85151  | 622.16797   | 35.09851  | Detected | Detected    | Detected | Detected    |
| 111 | A_33_P3226775 | MUC20     | Hs.308992 | mucin 20, cell surface associated                               | Homo sapiens mucin 20, cell surface associated (MUC20), transcript variant S, mRNA [NM_001098516]                                                                                                                    | 28.83724 | up | 19.27050 | up | 105.88018   | 3.80184   | 60.99501    | 2.79105   | Detected | Compromised | Detected | Compromised |
| 112 | A_33_P3403053 |           |           |                                                                 |                                                                                                                                                                                                                      | 28.82709 | up | 24.09965 | up | 114.81238   | 4.12402   | 101.79661   | 3.72467   | Detected | Compromised | Detected | Compromised |
| 113 | A_23_P156907  | SOBP      | Hs.445244 | sine oculis binding protein homolog (Drosophila)                | Homo sapiens sine oculis binding protein homolog (Drosophila) (SOBP), mRNA [NM_018013]                                                                                                                               | 28.62486 | up | 47.26331 | up | 289.61200   | 10.47626  | 219.32841   | 4.09201   | Detected | Compromised | Detected | Compromised |
| 114 | A_23_P51587   | RGS7      | Hs.655739 | regulator of G-protein signaling 7                              | Homo sapiens regulator of G-protein signaling 7 (RGS7), mRNA [NM_002924]                                                                                                                                             | 28.38625 | up | 20.62096 | up | 103.42441   | 3.77266   | 79.21559    | 3.38741   | Detected | Compromised | Detected | Compromised |
| 115 | A_23_P160336  | LEFTY1    | Hs.720965 | left-right determination factor 1                               | Homo sapiens left-right determination factor 1 (LEFTY1), mRNA [NM_020997]                                                                                                                                            | 27.25997 | up | 19.68110 | up | 94.15096    | 3.57629   | 80.80880    | 3.62055   | Detected | Compromised | Detected | Compromised |
| 116 | A_32_P172141  | CDON      | Hs.38034  | Cdon homolog (mouse)                                            | Homo sapiens Cdon homolog (mouse) (CDON), mRNA [NM_016952]                                                                                                                                                           | 27.23026 | up | 33.82092 | up | 159.92126   | 6.08118   | 112.84336   | 2.94209   | Detected | Compromised | Detected | Compromised |
| 117 | A_33_P3246883 | DMKN      | Hs.417795 | dermokine                                                       | Homo sapiens dermokine (DMKN), transcript variant 1, mRNA [NM_001035516]                                                                                                                                             | 26.97098 | up | 20.76584 | up | 4352.25200  | 167.08998 | 4441.97700  | 188.62196 | Detected | Detected    | Detected | Detected    |
| 118 | A_33_P3363271 | CACNB2    | Hs.59093  | calcium channel, voltage-dependent, beta 2 subunit              | Homo sapiens calcium channel, voltage-dependent, beta 2 subunit (CACNB2), transcript variant 1, mRNA [NM_000724]                                                                                                     | 26.95618 | up | 38.19681 | up | 539.53580   | 20.72502  | 363.61682   | 8.39426   | Detected | Detected    | Detected | Compromised |
| 119 | A_23_P45025   | MAPK10    | Hs.125503 | mitogen-activated protein kinase 10                             | Homo sapiens mitogen-activated protein kinase 10 (MAPK10), transcript variant 3, mRNA [NM_138980]                                                                                                                    | 26.88256 | up | 20.18612 | up | 89.23782    | 3.43725   | 66.96814    | 2.92537   | Detected | Compromised | Detected | Compromised |
| 120 | A_23_P320261  | DMKN      | Hs.417795 | dermokine                                                       | Homo sapiens dermokine (DMKN), transcript variant 1, mRNA [NM_001035516]                                                                                                                                             | 26.58805 | up | 22.65370 | up | 21769.64600 | 847.80890 | 16328.26500 | 635.57446 | Detected | Detected    | Detected | Detected    |
| 121 | A_23_P115261  | AGT       | Hs.19383  | angiotensinogen (serpin peptidase inhibitor, clade A, member 8) | Homo sapiens angiotensinogen (serpin peptidase inhibitor, clade A, member 8) (AGT), mRNA [NM_000029]                                                                                                                 | 26.29971 | up | 26.45119 | up | 1720.13070  | 67.72418  | 1436.19140  | 47.87763  | Detected | Detected    | Detected | Detected    |

|     |               |              |           |                                                                                                    |                                                                                                                                                                   |          |    |          |    |             |            |             |            |          |             |          |             |
|-----|---------------|--------------|-----------|----------------------------------------------------------------------------------------------------|-------------------------------------------------------------------------------------------------------------------------------------------------------------------|----------|----|----------|----|-------------|------------|-------------|------------|----------|-------------|----------|-------------|
| 122 | A_23_P417261  | EFHB         | Hs.670883 | EF-hand domain family, member B                                                                    | Homo sapiens EF-hand domain family, member B (EFHB), mRNA [NM_144715]                                                                                             | 25.67548 | up | 51.96707 | up | 219.54419   | 8.85394    | 158.34073   | 2.68677    | Detected | Compromised | Detected | Compromised |
| 123 | A_33_P3226212 | JAM2         | Hs.517227 | junctional adhesion molecule 2                                                                     | Homo sapiens junctional adhesion molecule 2 (JAM2), mRNA [NM_021219]                                                                                              | 25.66978 | up | 29.49885 | up | 1741.77920  | 70.25935   | 1490.58920  | 44.55725   | Detected | Detected    | Detected | Detected    |
| 124 | A_33_P3312658 |              |           |                                                                                                    | Kynureninase (EC 3.7.1.3)(L-kynurenine hydrolase) [Source:UniProtKB/Swiss-Prot;Acc:Q16719] [ENST00000410015]                                                      | 25.64462 | up | 16.14607 | up | 92.85991    | 3.74943    | 60.55794    | 3.30727    | Detected | Compromised | Detected | Compromised |
| 125 | A_23_P91334   | HSPA12B      | Hs.516854 | heat shock 70kD protein 12B                                                                        | Homo sapiens heat shock 70kD protein 12B (HSPA12B), mRNA [NM_052370]                                                                                              | 25.64325 | up | 44.37856 | up | 458.91040   | 18.53053   | 383.27050   | 7.61549    | Detected | Detected    | Detected | Compromised |
| 126 | A_33_P3216277 | LOC100131354 | Hs.675317 | hypothetical LOC100131354                                                                          | PREDICTED: Homo sapiens hypothetical LOC100131354 (LOC100131354), mRNA [XM_001718006]                                                                             | 25.52585 | up | 21.35703 | up | 98.77198    | 4.00670    | 58.69536    | 2.42342    | Detected | Compromised | Detected | Compromised |
| 127 | A_24_P224488  | MAPT         | Hs.101174 | microtubule-associated protein tau                                                                 | Homo sapiens microtubule-associated protein tau (MAPT), transcript variant 1, mRNA [NM_016835]                                                                    | 25.16290 | up | 30.70013 | up | 218.93666   | 9.00929    | 202.72017   | 5.82267    | Detected | Compromised | Detected | Compromised |
| 128 | A_33_P3210492 | C1QTNF4      | Hs.662633 | C1q and tumor necrosis factor related protein 4                                                    | Homo sapiens C1q and tumor necrosis factor related protein 4 (C1QTNF4), mRNA [NM_031909]                                                                          | 24.92442 | up | 22.31644 | up | 549.33105   | 22.82139   | 227.83722   | 9.00255    | Detected | Detected    | Detected | Compromised |
| 129 | A_23_P157766  | C9orf68      | Hs.179615 | chromosome 9 open reading frame 68                                                                 | Homo sapiens chromosome 9 open reading frame 68 (C9orf68), mRNA [NM_001039395]                                                                                    | 24.71063 | up | 22.96372 | up | 136.48941   | 5.71937    | 74.74722    | 2.87024    | Detected | Compromised | Detected | Compromised |
| 130 | A_33_P3216090 | SHC3         | Hs.656806 | SHC (Src homology 2 domain containing) transforming protein 3                                      | Homo sapiens SHC (Src homology 2 domain containing) transforming protein 3 (SHC3), mRNA [NM_016848]                                                               | 24.43761 | up | 23.57672 | up | 606.78467   | 25.71041   | 739.49786   | 27.65789   | Detected | Detected    | Detected | Detected    |
| 131 | A_33_P3259183 | FAM78B       | Hs.493518 | family with sequence similarity 78, member B                                                       | Homo sapiens family with sequence similarity 78, member B (FAM78B), mRNA [NM_001017961]                                                                           | 24.41408 | up | 14.40718 | up | 318.97970   | 13.52869   | 244.20084   | 14.94630   | Detected | Compromised | Detected | Compromised |
| 132 | A_23_P90453   | KRTDAP       | Hs.112457 | keratinocyte differentiation-associated protein                                                    | Homo sapiens keratinocyte differentiation-associated protein (KRTDAP), mRNA [NM_207392]                                                                           | 24.25390 | up | 19.91099 | up | 76.82884    | 3.28001    | 62.71435    | 2.77741    | Detected | Compromised | Detected | Compromised |
| 133 | A_23_P204847  | LCP1         | Hs.381099 | lymphocyte cytosolic protein 1 (L-plastin)                                                         | Homo sapiens lymphocyte cytosolic protein 1 (L-plastin) (LCP1), mRNA [NM_002296]                                                                                  | 23.96012 | up | 26.26848 | up | 2142.38280  | 92.58511   | 1806.19030  | 60.63090   | Detected | Detected    | Detected | Detected    |
| 134 | A_23_P167920  | DLL1         | Hs.379912 | delta-like 1 (Drosophila)                                                                          | Homo sapiens delta-like 1 (Drosophila) (DLL1), mRNA [NM_005618]                                                                                                   | 23.86572 | up | 20.80848 | up | 536.94806   | 23.29651   | 409.12323   | 17.33721   | Detected | Detected    | Detected | Detected    |
| 135 | A_33_P3315134 | DIRC3        | Hs.572788 | disrupted in renal carcinoma 3                                                                     | Homo sapiens disrupted in renal carcinoma 3 (DIRC3), non-coding RNA [NR_026597]                                                                                   | 23.34748 | up | 17.01258 | up | 156.27208   | 6.93066    | 108.12130   | 5.60411    | Detected | Compromised | Detected | Compromised |
| 136 | A_33_P3269110 | GUCY1A3      | Hs.24258  | guanylate cyclase 1, soluble, alpha 3                                                              | Homo sapiens guanylate cyclase 1, soluble, alpha 3 (GUCY1A3), transcript variant 6, mRNA [NM_001130686]                                                           | 23.25774 | up | 20.70064 | up | 97.22958    | 4.32877    | 75.02280    | 3.19577    | Detected | Compromised | Detected | Compromised |
| 137 | A_23_P133293  | MCTP1        | Hs.655087 | multiple C2 domains, transmembrane 1                                                               | Homo sapiens multiple C2 domains, transmembrane 1 (MCTP1), transcript variant L, mRNA [NM_024717]                                                                 | 23.02720 | up | 20.42284 | up | 1205.85190  | 54.22330   | 747.16660   | 32.26019   | Detected | Detected    | Detected | Detected    |
| 138 | A_32_P167705  | AGBL2        | Hs.147377 | ATP/GTP binding protein-like 2                                                                     | Homo sapiens ATP/GTP binding protein-like 2 (AGBL2), mRNA [NM_024782]                                                                                             | 22.77683 | up | 7.79309  | up | 70.56771    | 3.20808    | 42.20715    | 4.77575    | Detected | Compromised | Detected | Compromised |
| 139 | A_23_P156890  | TCF21        | Hs.720025 | transcription factor 21                                                                            | Homo sapiens transcription factor 21 (TCF21), transcript variant 2, mRNA [NM_003206]                                                                              | 22.56896 | up | 16.27856 | up | 144.70180   | 6.63889    | 168.67722   | 9.13705    | Detected | Compromised | Detected | Compromised |
| 140 | A_23_P319232  | KIAA1045     | Hs.7989   | KIAA1045                                                                                           | Homo sapiens KIAA1045 (KIAA1045), mRNA [NM_015297]                                                                                                                | 22.52243 | up | 21.26069 | up | 70.04020    | 3.22007    | 64.85850    | 2.69002    | Detected | Compromised | Detected | Compromised |
| 141 | A_23_P302207  | ZNF853       | Hs.592170 | zinc finger protein 853                                                                            | Homo sapiens zinc finger protein 853 (ZNF853), mRNA [NM_017560]                                                                                                   | 22.49574 | up | 9.58104  | up | 84.28135    | 3.87940    | 72.36288    | 6.65991    | Detected | Compromised | Detected | Compromised |
| 142 | A_24_P63537   | ERAP1        | Hs.716426 | endoplasmic reticulum aminopeptidase 1                                                             | Homo sapiens endoplasmic reticulum aminopeptidase 1 (ERAP1), transcript variant 1, mRNA [NM_016442]                                                               | 22.38158 | up | 12.87026 | up | 205.45345   | 9.50508    | 51.66121    | 3.53951    | Detected | Compromised | Detected | Compromised |
| 143 | A_33_P3409974 | THRB         | Hs.187861 | thyroid hormone receptor, beta (erythroblastic leukemia viral (v-erb-b) oncogene homolog 2, avian) | Homo sapiens thyroid hormone receptor, beta (erythroblastic leukemia viral (v-erb-b) oncogene homolog 2, avian) (THRB), transcript variant 3, mRNA [NM_001128177] | 22.18514 | up | 16.88650 | up | 81.50356    | 3.80406    | 78.22823    | 4.08498    | Detected | Compromised | Detected | Compromised |
| 144 | A_23_P78782   | CA11         | Hs.428446 | carbonic anhydrase XI                                                                              | Homo sapiens carbonic anhydrase XI (CA11), mRNA [NM_001217]                                                                                                       | 22.16652 | up | 34.45066 | up | 252.82680   | 11.81024   | 288.16467   | 7.37579    | Detected | Compromised | Detected | Compromised |
| 145 | A_33_P3350374 | C10orf58     | Hs.500333 | chromosome 10 open reading frame 58                                                                | Homo sapiens chromosome 10 open reading frame 58 (C10orf58), transcript variant 1, mRNA [NM_032333]                                                               | 22.04568 | up | 34.69864 | up | 298.76492   | 14.03263   | 361.52570   | 9.18739    | Detected | Compromised | Detected | Compromised |
| 146 | A_23_P163238  | STRC         | Hs.657395 | stereocilin                                                                                        | Homo sapiens stereocilin (STRC), mRNA [NM_153700]                                                                                                                 | 21.97016 | up | 8.40048  | up | 70.51856    | 3.32356    | 72.56361    | 7.61694    | Detected | Compromised | Detected | Compromised |
| 147 | A_33_P3419190 | AREG         | Hs.270833 | amphiregulin                                                                                       | Homo sapiens amphiregulin (AREG), mRNA [NM_001657]                                                                                                                | 21.79760 | up | 22.24821 | up | 15615.27900 | 741.77940  | 9681.86800  | 383.73340  | Detected | Detected    | Detected | Detected    |
| 148 | A_24_P48204   | SECTM1       | Hs.558009 | secreted and transmembrane 1                                                                       | Homo sapiens secreted and transmembrane 1 (SECTM1), mRNA [NM_003004]                                                                                              | 21.65068 | up | 20.72855 | up | 19150.86000 | 915.90375  | 9143.48400  | 388.96295  | Detected | Detected    | Detected | Detected    |
| 149 | A_24_P278747  | CCND2        | Hs.376071 | cyclin D2                                                                                          | Homo sapiens cyclin D2 (CCND2), mRNA [NM_001759]                                                                                                                  | 21.36604 | up | 16.80621 | up | 1283.24300  | 62.18964   | 1037.41260  | 54.43112   | Detected | Detected    | Detected | Detected    |
| 150 | A_33_P3269109 | GUCY1A3      | Hs.24258  | guanylate cyclase 1, soluble, alpha 3                                                              | Homo sapiens guanylate cyclase 1, soluble, alpha 3 (GUCY1A3), transcript variant 6, mRNA [NM_001130686]                                                           | 21.33896 | up | 9.51538  | up | 63.07116    | 3.06049    | 39.90500    | 3.69800    | Detected | Compromised | Detected | Compromised |
| 151 | A_24_P254850  | SEC14L5      | Hs.512856 | SEC14-like 5 (S. cerevisiae)                                                                       | Homo sapiens SEC14-like 5 (S. cerevisiae) (SEC14L5), mRNA [NM_014692]                                                                                             | 21.22127 | up | 11.23725 | up | 60.90013    | 2.97153    | 31.17798    | 2.44655    | Detected | Compromised | Detected | Compromised |
| 152 | A_23_P259071  | AREG         | Hs.270833 | amphiregulin                                                                                       | Homo sapiens amphiregulin (AREG), mRNA [NM_001657]                                                                                                                | 21.10707 | up | 22.91913 | up | 51166.50000 | 2510.09900 | 45443.98400 | 1748.41210 | Detected | Detected    | Detected | Detected    |

|     |               |              |           |                                                                           |                                                                                                                                        |          |    |          |    |            |           |            |          |          |             |          |             |
|-----|---------------|--------------|-----------|---------------------------------------------------------------------------|----------------------------------------------------------------------------------------------------------------------------------------|----------|----|----------|----|------------|-----------|------------|----------|----------|-------------|----------|-------------|
| 153 | A_33_P3403576 | FCGR2A       | Hs.352642 | Fc fragment of IgG, low affinity Ila, receptor (CD32)                     | Homo sapiens Fc fragment of IgG, low affinity Ila, receptor (CD32) (FCGR2A), transcript variant 1, mRNA [NM_001136219]                 | 20.96401 | up | 4.70850  | up | 88.30619   | 4.36164   | 74.44190   | 13.94122 | Detected | Compromised | Detected | Compromised |
| 154 | A_32_P69849   | BEX5         | Hs.47209  | brain expressed, X-linked 5                                               | Homo sapiens brain expressed, X-linked 5 (BEX5), transcript variant 1, mRNA [NM_001012978]                                             | 20.89748 | up | 19.77356 | up | 500.22473  | 24.78589  | 406.50775  | 18.12798 | Detected | Detected    | Detected | Detected    |
| 155 | A_33_P3387766 | LOC284276    | Hs.390287 | hypothetical LOC284276                                                    | Homo sapiens hypothetical LOC284276 (LOC284276), non-coding RNA [NR_015417]                                                            | 20.58447 | up | 19.46914 | up | 294.78238  | 14.82842  | 169.29780  | 7.66779  | Detected | Compromised | Detected | Compromised |
| 156 | A_23_P354705  | ST8SIA1      | Hs.408614 | ST8 alpha-N-acetylneuraminidase alpha-2.8-sialyltransferase 1             | Homo sapiens ST8 alpha-N-acetylneuraminidase alpha-2.8-sialyltransferase 1 (ST8SIA1), mRNA [NM_003034]                                 | 20.50480 | up | 15.84092 | up | 68.03804   | 3.43581   | 52.09912   | 2.90012  | Detected | Compromised | Detected | Compromised |
| 157 | A_24_P329487  | FAM84B       | Hs.124951 | family with sequence similarity 84, member B                              | Homo sapiens family with sequence similarity 84, member B (FAM84B), mRNA [NM_174911]                                                   | 20.48407 | up | 18.21981 | up | 202.27562  | 10.22493  | 61.89389   | 2.99550  | Detected | Compromised | Detected | Compromised |
| 158 | A_33_P3883116 | LOC253962    | Hs.558704 | hypothetical protein LOC253962                                            | Homo sapiens hypothetical protein LOC253962, mRNA (cDNA clone IMAGE:5244335), partial cds [BC041476]                                   | 20.34616 | up | 12.95133 | up | 59.99200   | 3.05312   | 36.84636   | 2.50868  | Detected | Compromised | Detected | Compromised |
| 159 | A_33_P3220919 | ADRBK2       | Hs.657494 | adrenergic, beta, receptor kinase 2                                       | Homo sapiens adrenergic, beta, receptor kinase 2 (ADRBK2), mRNA [NM_005160]                                                            | 20.27522 | up | 19.78268 | up | 1639.76640 | 83.74319  | 1101.26150 | 49.08750 | Detected | Detected    | Detected | Detected    |
| 160 | A_33_P3367636 | C6orf221     | Hs.128326 | chromosome 6 open reading frame 221                                       | Homo sapiens chromosome 6 open reading frame 221 (C6orf221), mRNA [NM_001017361]                                                       | 20.27000 | up | 22.70337 | up | 109.27738  | 5.58226   | 82.21005   | 3.19301  | Detected | Compromised | Detected | Compromised |
| 161 | A_33_P3330911 | BCAS1        | Hs.400556 | breast carcinoma amplified sequence 1                                     | Homo sapiens breast carcinoma amplified sequence 1 (BCAS1), mRNA [NM_003657]                                                           | 20.04318 | up | 29.30792 | up | 471.96838  | 24.38256  | 236.39279  | 7.11238  | Detected | Detected    | Detected | Compromised |
| 162 | A_23_P392470  | NR3C2        | Hs.163924 | nuclear receptor subfamily 3, group C, member 2                           | Homo sapiens nuclear receptor subfamily 3, group C, member 2 (NR3C2), transcript variant 1, mRNA [NM_000901]                           | 19.98141 | up | 12.73011 | up | 59.13012   | 3.06419   | 44.21335   | 3.06258  | Detected | Compromised | Detected | Compromised |
| 163 | A_33_P3220738 | ASTN1        | Hs.495897 | astrotactin 1                                                             | Homo sapiens astrotactin 1 (ASTN1), transcript variant 2, mRNA [NM_207108]                                                             | 19.93486 | up | 13.76883 | up | 59.78233   | 3.10522   | 40.28374   | 2.57987  | Detected | Compromised | Detected | Compromised |
| 164 | A_23_P136671  | UGT2B7       | Hs.654424 | UDP glucuronosyltransferase 2 family, polypeptide B7                      | Homo sapiens UDP glucuronosyltransferase 2 family, polypeptide B7 (UGT2B7), mRNA [NM_001074]                                           | 19.92933 | up | 8.56417  | up | 65.10293   | 3.38252   | 27.84269   | 2.86676  | Detected | Compromised | Detected | Compromised |
| 165 | A_23_P207456  | CCL8         | Hs.271387 | chemokine (C-C motif) ligand 8                                            | Homo sapiens chemokine (C-C motif) ligand 8 (CCL8), mRNA [NM_005623]                                                                   | 19.66330 | up | 14.61421 | up | 61.14666   | 3.21668   | 44.24966   | 2.66993  | Detected | Compromised | Detected | Compromised |
| 166 | A_33_P3398578 | LOC100131208 | Hs.658178 | similar to hCG2045825                                                     | Homo sapiens cDNA FLJ42971 fis, clone BRSTN2018083 [AK124961]                                                                          | 19.67581 | up | 14.53590 | up | 66.97075   | 3.52440   | 49.46848   | 3.00090  | Detected | Compromised | Detected | Compromised |
| 167 | A_32_P57810   | RNF157       | Hs.500643 | ring finger protein 157                                                   | Homo sapiens ring finger protein 157 (RNF157), mRNA [NM_052916]                                                                        | 19.63899 | up | 17.21282 | up | 1199.13500 | 63.22402  | 878.70080  | 45.01472 | Detected | Detected    | Detected | Detected    |
| 168 | A_24_P245838  | MGAT3        | Hs.276808 | mannosyl (beta-1,4)-glycoprotein beta-1,4-N-acetylglucosaminyltransferase | Homo sapiens mannosyl (beta-1,4)-glycoprotein beta-1,4-N-acetylglucosaminyltransferase (MGAT3), transcript variant 1, mRNA [NM_002409] | 19.52502 | up | 11.00780 | up | 71.27815   | 3.78005   | 39.87063   | 3.19388  | Detected | Compromised | Detected | Compromised |
| 169 | A_33_P3222424 | CSF3         | Hs.2233   | colony stimulating factor 3 (granulocyte)                                 | Homo sapiens colony stimulating factor 3 (granulocyte) (CSF3), transcript variant 1, mRNA [NM_000759]                                  | 19.50861 | up | 19.62701 | up | 1023.51210 | 54.32501  | 587.20544  | 26.38162 | Detected | Detected    | Detected | Detected    |
| 170 | A_24_P348861  | TTY15        | Hs.433656 | testis-specific transcript, Y-linked 15 (non-protein coding)              | Homo sapiens testis-specific transcript, Y-linked 15 (non-protein coding) (TTY15), non-coding RNA [NR_001545]                          | 19.50555 | up | 9.74274  | up | 65.23033   | 3.46278   | 32.06854   | 2.90244  | Detected | Compromised | Detected | Compromised |
| 171 | A_24_P383459  | RNF157       | Hs.500643 | ring finger protein 157                                                   | Homo sapiens ring finger protein 157 (RNF157), mRNA [NM_052916]                                                                        | 19.50244 | up | 12.61229 | up | 63.39179   | 3.36572   | 40.37465   | 2.82280  | Detected | Compromised | Detected | Compromised |
| 172 | A_24_P352952  | FAM20A       | Hs.268874 | family with sequence similarity 20, member A                              | Homo sapiens family with sequence similarity 20, member A (FAM20A), transcript variant 1, mRNA [NM_017565]                             | 19.50080 | up | 15.72512 | up | 199.26454  | 10.58061  | 213.21626  | 11.95616 | Detected | Compromised | Detected | Compromised |
| 173 | A_33_P3309551 | PTPRD        | Hs.446083 | protein tyrosine phosphatase, receptor type, D                            | Homo sapiens protein tyrosine phosphatase, receptor type, D (PTPRD), transcript variant 1, mRNA [NM_002839]                            | 19.49539 | up | 13.40210 | up | 120.84581  | 6.41849   | 88.34084   | 5.81239  | Detected | Compromised | Detected | Compromised |
| 174 | A_33_P3337134 | ABLIM2       | Hs.233404 | actin binding LIM protein family, member 2                                | Homo sapiens actin binding LIM protein family, member 2 (ABLIM2), transcript variant 1, mRNA [NM_001130083]                            | 19.32979 | up | 25.40682 | up | 118.96076  | 6.37250   | 97.44179   | 3.38190  | Detected | Compromised | Detected | Compromised |
| 175 | A_33_P3523583 | LOC642924    | Hs.434882 | hypothetical protein LOC642924                                            | Homo sapiens cDNA clone IMAGE:5277089 [BC037909]                                                                                       | 19.32162 | up | 16.05821 | up | 59.20582   | 3.17288   | 47.81736   | 2.62575  | Detected | Compromised | Detected | Compromised |
| 176 | A_32_P119033  | PLCXD3       | Hs.145404 | phosphatidylinositol-specific phospholipase C, X domain containing 3      | Homo sapiens phosphatidylinositol-specific phospholipase C, X domain containing 3 (PLCXD3), mRNA [NM_001005473]                        | 19.26149 | up | 23.59467 | up | 349.46060  | 18.78631  | 189.44217  | 7.07992  | Detected | Detected    | Detected | Compromised |
| 177 | A_33_P3234202 | DNASE1L3     | Hs.476453 | deoxyribonuclease I-like 3                                                | Homo sapiens deoxyribonuclease I-like 3 (DNASE1L3), mRNA [NM_004944]                                                                   | 19.23502 | up | 70.31754 | up | 323.46573  | 17.41280  | 223.38309  | 2.80125  | Detected | Detected    | Detected | Compromised |
| 178 | A_33_P3324675 |              |           |                                                                           |                                                                                                                                        | 19.16414 | up | 8.96456  | up | 4156.93650 | 224.60384 | 812.28656  | 79.89982 | Detected | Detected    | Detected | Detected    |
| 179 | A_23_P60146   | PDGFRL       | Hs.458573 | platelet-derived growth factor receptor-like                              | Homo sapiens platelet-derived growth factor receptor-like (PDGFRL), mRNA [NM_006207]                                                   | 19.03447 | up | 19.35363 | up | 2403.17380 | 130.73070 | 1754.59250 | 79.94280 | Detected | Detected    | Detected | Detected    |
| 180 | A_33_P3275702 | FMO2         | Hs.144912 | flavin containing monooxygenase 2 (non-functional)                        | Homo sapiens flavin containing monooxygenase 2 (non-functional) (FMO2), mRNA [NM_001480]                                               | 18.92319 | up | 16.11199 | up | 74.85105   | 4.09578   | 63.28128   | 3.46331  | Detected | Compromised | Detected | Compromised |
| 181 | A_33_P3775848 | CLIC2        | Hs.655445 | chloride intracellular channel 2                                          | Homo sapiens chloride intracellular channel 2 (CLIC2), mRNA [NM_001289]                                                                | 18.90731 | up | 20.92745 | up | 1406.09060 | 77.00459  | 1114.58330 | 46.96363 | Detected | Detected    | Detected | Detected    |
| 182 | A_33_P3221129 | LRRN4CL      | Hs.427449 | LRRN4 C-terminal like                                                     | Homo sapiens LRRN4 C-terminal like (LRRN4CL), mRNA [NM_203422]                                                                         | 18.89436 | up | 21.51344 | up | 2375.74270 | 130.19678 | 1711.85230 | 70.16525 | Detected | Detected    | Detected | Detected    |

|     |               |              |           |                                                                              |                                                                                                                                          |          |    |          |             |            |             |            |          |             |          |             |
|-----|---------------|--------------|-----------|------------------------------------------------------------------------------|------------------------------------------------------------------------------------------------------------------------------------------|----------|----|----------|-------------|------------|-------------|------------|----------|-------------|----------|-------------|
| 183 | A_23_P137665  | CHI3L1       | Hs.382202 | chitinase 3-like 1 (cartilage glycoprotein-39)                               | Homo sapiens chitinase 3-like 1 (cartilage glycoprotein-39) (CHI3L1), mRNA [NM_001276]                                                   | 18.78310 | up | 17.45700 | 382.54202   | 21.08847   | 427.23523   | 21.58057   | Detected | Detected    | Detected | Detected    |
| 184 | A_33_P3245290 | AQP7P1       |           | aquaporin 7 pseudogene 1                                                     | Homo sapiens aquaporin 7 pseudogene 1 (AQP7P1), non-coding RNA [NR_002817]                                                               | 18.65274 | up | 31.35724 | 257.98795   | 14.32155   | 193.14859   | 5.43149    | Detected | Compromised | Detected | Compromised |
| 185 | A_33_P3392829 | ESPNL        | Hs.127724 | espin-like                                                                   | Homo sapiens espin-like (ESPNL), mRNA [NM_194312]                                                                                        | 18.63819 | up | 13.60274 | 100.17568   | 5.56534    | 94.01432    | 6.09443    | Detected | Compromised | Detected | Compromised |
| 186 | A_33_P3328410 | LOC100291851 | Hs.710930 | similar to Putative ubiquitin-like protein FUBI-like protein ENSP00000310146 | PREDICTED: Homo sapiens similar to Putative ubiquitin-like protein FUBI-like protein ENSP00000310146 (LOC100291851), mRNA [XM_002344576] | 18.52163 | up | 15.40838 | 309.13718   | 17.28244   | 217.92830   | 12.47160   | Detected | Detected    | Detected | Detected    |
| 187 | A_33_P3328626 |              |           |                                                                              |                                                                                                                                          | 18.46876 | up | 6.50731  | 56.58904    | 3.17269    | 38.77446    | 5.25424    | Detected | Compromised | Detected | Compromised |
| 188 | A_24_P397817  | LEP          | Hs.194236 | leptin                                                                       | Homo sapiens leptin (LEP), mRNA [NM_000230]                                                                                              | 18.43113 | up | 10.13718 | 79.96177    | 4.49224    | 34.25934    | 2.98008    | Detected | Compromised | Detected | Compromised |
| 189 | A_33_P3309491 | PTPRU        | Hs.19718  | protein tyrosine phosphatase, receptor type, U                               | Homo sapiens protein tyrosine phosphatase, receptor type, U (PTPRU), transcript variant 3, mRNA [NM_005704]                              | 18.24097 | up | 14.66093 | 23720.78300 | 1346.52400 | 16916.72500 | 1017.46650 | Detected | Detected    | Detected | Detected    |
| 190 | A_32_P88880   |              |           |                                                                              |                                                                                                                                          | 18.09206 | up | 63.11618 | 261.83160   | 14.98536   | 222.54968   | 3.10922    | Detected | Compromised | Detected | Compromised |
| 191 | A_23_P12082   | CHI3L2       | Hs.514840 | chitinase 3-like 2                                                           | Homo sapiens chitinase 3-like 2 (CHI3L2), transcript variant 3, mRNA [NM_01025193]                                                       | 18.05685 | up | 17.24178 | 495.44020   | 28.41073   | 384.22250   | 19.65017   | Detected | Detected    | Detected | Detected    |
| 192 | A_32_P112910  | UBL4B        | Hs.374027 | ubiquitin-like 4B                                                            | Homo sapiens ubiquitin-like 4B (UBL4B), mRNA [NM_203412]                                                                                 | 18.04254 | up | 5.54037  | 105.18018   | 6.03628    | 112.14821   | 17.84922   | Detected | Compromised | Detected | Detected    |
| 193 | A_23_P25615   | SOHLH2       | Hs.124519 | spermatogenesis and oogenesis specific basic helix-loop-helix 2              | Homo sapiens spermatogenesis and oogenesis specific basic helix-loop-helix 2 (SOHLH2), mRNA [NM_017826]                                  | 18.01618 | up | 12.19154 | 51.85608    | 2.98037    | 33.81922    | 2.44608    | Detected | Compromised | Detected | Compromised |
| 194 | A_24_P365679  | RRP7B        | Hs.534041 | ribosomal RNA processing 7 homolog B (S. cerevisiae)                         | Homo sapiens cDNA FLJ40882 fis, clone LTERU2000424 [AK098201]                                                                            | 17.89545 | up | 8.14775  | 70.84905    | 4.09944    | 69.48125    | 7.51962    | Detected | Compromised | Detected | Compromised |
| 195 | A_23_P418431  | C6orf164     | Hs.645177 | chromosome 6 open reading frame 164                                          | Homo sapiens chromosome 6 open reading frame 164 (C6orf164), non-coding RNA [NR_026784]                                                  | 17.88613 | up | 7.72426  | 62.19009    | 3.60029    | 35.18921    | 4.01715    | Detected | Compromised | Detected | Compromised |
| 196 | A_33_P3251552 | RSPO4        | Hs.444980 | R-spondin family, member 4                                                   | Homo sapiens R-spondin family, member 4 (RSPO4), transcript variant 1, mRNA [NM_001029871]                                               | 17.86719 | up | 16.45114 | 888.90186   | 51.51464   | 711.03360   | 38.11181   | Detected | Detected    | Detected | Detected    |
| 197 | A_23_P68031   | STAT4        | Hs.80642  | signal transducer and activator of transcription 4                           | Homo sapiens signal transducer and activator of transcription 4 (STAT4), mRNA [NM_003151]                                                | 17.85223 | up | 13.42182 | 1149.00940  | 66.64448   | 871.92413   | 57.28394   | Detected | Detected    | Detected | Detected    |
| 198 | A_33_P3317603 | B4GALNT4     | Hs.148074 | beta-1,4-N-acetyl-galactosaminyl transferase 4                               | Homo sapiens beta-1,4-N-acetyl-galactosaminyl transferase 4 (B4GALNT4), mRNA [NM_178537]                                                 | 17.81463 | up | 17.20743 | 336.80320   | 19.56476   | 374.65118   | 19.19891   | Detected | Detected    | Detected | Detected    |
| 199 | A_33_P3374987 | C7orf52      | Hs.213044 | chromosome 7 open reading frame 52                                           | Homo sapiens chromosome 7 open reading frame 52 (C7orf52), mRNA [NM_198571]                                                              | 17.78886 | up | 22.36739 | 279.63280   | 16.27696   | 216.27054   | 8.52604    | Detected | Compromised | Detected | Compromised |
| 200 | A_33_P3341601 | WDR86        | Hs.647083 | WD repeat domain 86                                                          | Homo sapiens WD repeat domain 86 (WDR86), mRNA [NM_198285]                                                                               | 17.74816 | up | 46.52995 | 166.58890   | 9.71910    | 155.19218   | 2.94105    | Detected | Compromised | Detected | Compromised |
| 201 | A_33_P3288594 | LOC100129055 | Hs.148265 | cyclin Y-like pseudogene                                                     | Homo sapiens cyclin Y-like pseudogene (LOC100129055), non-coding RNA [NR_024524]                                                         | 17.66299 | up | 9.30161  | 82.89698    | 4.85968    | 35.88683    | 3.40206    | Detected | Compromised | Detected | Compromised |
| 202 | A_23_P326893  | CCDC151      | Hs.124010 | coiled-coil domain containing 151                                            | Homo sapiens coiled-coil domain containing 151 (CCDC151), mRNA [NM_145045]                                                               | 17.64206 | up | 18.17707 | 191.25830   | 11.22546   | 225.04561   | 10.91722   | Detected | Compromised | Detected | Compromised |
| 203 | A_23_P136077  | PARK2        | Hs.132954 | Parkinson disease (autosomal recessive, juvenile) 2, parkin                  | Homo sapiens Parkinson disease (autosomal recessive, juvenile) 2, parkin (PARK2), transcript variant 1, mRNA [NM_004562]                 | 17.57617 | up | 9.96484  | 71.08962    | 4.18808    | 42.12795    | 3.72791    | Detected | Compromised | Detected | Compromised |
| 204 | A_23_P214011  | CDH6         | Hs.171054 | cadherin 6, type 2, K-cadherin (fetal kidney)                                | Homo sapiens cadherin 6, type 2, K-cadherin (fetal kidney) (CDH6), mRNA [NM_004932]                                                      | 17.57215 | up | 12.25478 | 55.89781    | 3.29384    | 38.52780    | 2.77226    | Detected | Compromised | Detected | Compromised |
| 205 | A_24_P195669  |              |           |                                                                              |                                                                                                                                          | 17.52130 | up | 7.05039  | 56.77738    | 3.35538    | 52.61725    | 6.58083    | Detected | Compromised | Detected | Compromised |
| 206 | A_23_P502413  | SERPINB4     | Hs.123035 | serpin peptidase inhibitor, clade B (ovalbumin), member 4                    | Homo sapiens serpin peptidase inhibitor, clade B (ovalbumin), member 4 (SERPINB4), mRNA [NM_002974]                                      | 17.51934 | up | 20.63824 | 130.46657   | 7.71107    | 122.02151   | 5.21350    | Detected | Compromised | Detected | Compromised |
| 207 | A_23_P411761  | CABP1        | Hs.458482 | calcium binding protein 1                                                    | Homo sapiens calcium binding protein 1 (CABP1), transcript variant 3, mRNA [NM_001033677]                                                | 17.49139 | up | 12.68175 | 50.30909    | 2.97821    | 37.61747    | 2.61563    | Detected | Compromised | Detected | Compromised |
| 208 | A_33_P3627001 | PEBP4        | Hs.491242 | phosphatidylethanolamine-binding protein 4                                   | Homo sapiens phosphatidylethanolamine-binding protein 4 (PEBP4), mRNA [NM_144962]                                                        | 17.40757 | up | 25.04212 | 2036.98270  | 121.16641  | 2251.50780  | 79.28079   | Detected | Detected    | Detected | Detected    |
| 209 | A_23_P334173  | LY75         | Hs.153563 | lymphocyte antigen 75                                                        | Homo sapiens lymphocyte antigen 75 (LY75), mRNA [NM_002349]                                                                              | 17.39153 | up | 20.53688 | 92.83244    | 5.52707    | 61.82533    | 2.65459    | Detected | Compromised | Detected | Compromised |
| 210 | A_23_P76364   | CD9          | Hs.114286 | CD9 molecule                                                                 | Homo sapiens CD9 molecule (CD9), mRNA [NM_001769]                                                                                        | 17.31517 | up | 15.03373 | 8418.92400  | 503.45750  | 8283.59800  | 485.86728  | Detected | Detected    | Detected | Detected    |
| 211 | A_32_P74409   | LOC387763    | Hs.714890 | hypothetical protein LOC387763                                               | Homo sapiens hypothetical protein LOC387763 (LOC387763), mRNA [NM_001145033]                                                             | 17.18526 | up | 16.48727 | 46052.15600 | 2774.76980 | 33126.72700 | 1771.72070 | Detected | Detected    | Detected | Detected    |
| 212 | A_23_P311124  | COL21A1      | Hs.47629  | collagen, type XXI, alpha 1                                                  | Homo sapiens collagen, type XXI, alpha 1 (COL21A1), mRNA [NM_030820]                                                                     | 16.99639 | up | 23.95970 | 230.03070   | 14.01400   | 192.30711   | 7.07749    | Detected | Compromised | Detected | Compromised |
| 213 | A_32_P225816  | PRDM16       | Hs.99500  | PR domain containing 16                                                      | Homo sapiens PR domain containing 16 (PRDM16), transcript variant 1, mRNA [NM_022114]                                                    | 16.96804 | up | 19.55479 | 54.21896    | 3.30866    | 62.82385    | 2.83294    | Detected | Compromised | Detected | Compromised |
| 214 | A_23_P320578  | RGS16        | Hs.413297 | regulator of G-protein signaling 16                                          | Homo sapiens regulator of G-protein signaling 16 (RGS16), mRNA [NM_002928]                                                               | 16.86487 | up | 17.74958 | 1795.71150  | 110.25202  | 1776.87080  | 88.27409   | Detected | Detected    | Detected | Detected    |
| 215 | A_23_P419150  | VENTX        | Hs.125231 | VENT homeobox homolog (Xenopus laevis)                                       | Homo sapiens VENT homeobox homolog (Xenopus laevis) (VENTX), mRNA [NM_014468]                                                            | 16.73882 | up | 10.49100 | 56.10853    | 3.47086    | 35.47286    | 2.98157    | Detected | Compromised | Detected | Compromised |

|     |               |           |           |                                                                              |                                                                                                                              |          |    |          |    |            |           |            |           |          |             |          |             |
|-----|---------------|-----------|-----------|------------------------------------------------------------------------------|------------------------------------------------------------------------------------------------------------------------------|----------|----|----------|----|------------|-----------|------------|-----------|----------|-------------|----------|-------------|
| 216 | A_32_P2452    | TMTC1     | Hs.401954 | transmembrane and tetra-ricopeptide repeat containing 1                      | Homo sapiens transmembrane and tetra-ricopeptide repeat containing 1 (TMTC1), mRNA [NM_175861]                               | 16.52263 | up | 16.74582 | up | 6265.59770 | 392.65980 | 4233.32600 | 222.91579 | Detected | Detected    | Detected | Detected    |
| 217 | A_23_P107247  | CACNA1G   | Hs.591169 | calcium channel, voltage-dependent, T type, alpha 1G subunit                 | Homo sapiens calcium channel, voltage-dependent, T type, alpha 1G subunit (CACNA1G), transcript variant 1, mRNA [NM_018886]  | 16.49892 | up | 16.28450 | up | 1343.89110 | 84.34154  | 1270.26770 | 68.78381  | Detected | Detected    | Detected | Detected    |
| 218 | A_32_P24140   | GAS2      | Hs.632151 | growth arrest-specific 2                                                     | Homo sapiens growth arrest-specific 2 (GAS2), transcript variant 1, mRNA [NM_005256]                                         | 16.49192 | up | 22.39991 | up | 92.59290   | 5.81353   | 78.18802   | 3.07793   | Detected | Compromised | Detected | Compromised |
| 219 | A_23_P165414  | KLHL23    | Hs.655150 | kelch-like 23 (Drosophila)                                                   | Homo sapiens kelch-like 23 (Drosophila) (KLHL23), mRNA [NM_144711]                                                           | 16.48298 | up | 7.20114  | up | 47.26945   | 2.96946   | 37.71457   | 4.61821   | Detected | Compromised | Detected | Compromised |
| 220 | A_23_P428129  | CDKN1C    | Hs.106070 | cyclin-dependent kinase inhibitor 1C (p57, Kip2)                             | Homo sapiens cyclin-dependent kinase inhibitor 1C (p57, Kip2) (CDKN1C), transcript variant 1, mRNA [NM_000076]               | 16.46644 | up | 16.32702 | up | 9082.93000 | 571.16187 | 7648.93360 | 413.10422 | Detected | Detected    | Detected | Detected    |
| 221 | A_23_P501754  | CSF3      | Hs.2233   | colony stimulating factor 3 (granulocyte)                                    | Homo sapiens colony stimulating factor 3 (granulocyte) (CSF3), transcript variant 1, mRNA [NM_000759]                        | 16.44386 | up | 13.52571 | up | 5151.21830 | 324.36890 | 4555.96400 | 297.02005 | Detected | Detected    | Detected | Detected    |
| 222 | A_23_P85693   | GBP2      | Hs.386567 | guanylate binding protein 2, interferon-inducible                            | Homo sapiens guanylate binding protein 2, interferon-inducible (GBP2), mRNA [NM_004120]                                      | 16.30703 | up | 14.91568 | up | 1501.62720 | 95.34990  | 1054.83370 | 62.36007  | Detected | Detected    | Detected | Detected    |
| 223 | A_23_P17420   | BCAS1     | Hs.400556 | breast carcinoma amplified sequence 1                                        | Homo sapiens breast carcinoma amplified sequence 1 (BCAS1), mRNA [NM_003657]                                                 | 16.28021 | up | 8.99733  | up | 70.13487   | 4.46074   | 49.66695   | 4.86765   | Detected | Compromised | Detected | Compromised |
| 224 | A_24_P460419  | LRRC10B   | Hs.441122 | leucine rich repeat containing 10B                                           | Homo sapiens leucine rich repeat containing 10B (LRRC10B), mRNA [NM_001145077]                                               | 16.19034 | up | 12.58499 | up | 150.32277  | 9.61395   | 51.78709   | 3.82856   | Detected | Compromised | Detected | Compromised |
| 225 | A_23_P111361  | PPIL6     | Hs.32234  | peptidylprolyl isomerase (cyclophilin)-like 6                                | Homo sapiens peptidylprolyl isomerase (cyclophilin)-like 6 (PPIL6), transcript variant 1, mRNA [NM_173672]                   | 16.11174 | up | 27.13692 | up | 286.86790  | 18.43625  | 183.14062  | 5.95100   | Detected | Detected    | Detected | Compromised |
| 226 | A_24_P390928  | TRAPPC6A  | Hs.466929 | trafficking protein particle complex 6A                                      | Homo sapiens trafficking protein particle complex 6A (TRAPPC6A), mRNA [NM_024108]                                            | 16.05205 | up | 17.24298 | up | 3576.17380 | 230.68602 | 4485.03400 | 229.36072 | Detected | Detected    | Detected | Detected    |
| 227 | A_24_P160680  | CCDC40    | Hs.202542 | coiled-coil domain containing 40                                             | Homo sapiens coiled-coil domain containing 40 (CCDC40), mRNA [NM_017950]                                                     | 16.04955 | up | 17.46065 | up | 46.96877   | 3.03025   | 49.37777   | 2.49366   | Detected | Compromised | Detected | Compromised |
| 228 | A_33_P3277527 | LAMC3     | Hs.201805 | laminin, gamma 3                                                             | Homo sapiens laminin, gamma 3 (LAMC3), mRNA [NM_008059]                                                                      | 15.94822 | up | 11.95579 | up | 127.50391  | 8.27836   | 150.00008  | 11.06315  | Detected | Compromised | Detected | Compromised |
| 229 | A_33_P3396537 | CDH29     | Hs.363312 | cadherin-like 29                                                             | Homo sapiens cadherin-like 29 (CDH29), mRNA [NM_001007540]                                                                   | 15.91217 | up | 11.08265 | up | 49.31988   | 3.20942   | 34.05270   | 2.70940   | Detected | Compromised | Detected | Compromised |
| 230 | A_24_P94402   | MYCN      | Hs.25960  | v-myc myelocytomatosis viral related oncogene, neuroblastoma derived (avian) | Homo sapiens v-myc myelocytomatosis viral related oncogene, neuroblastoma derived (avian) (MYCN), mRNA [NM_005378]           | 15.90164 | up | 9.83994  | up | 49.64475   | 3.23269   | 30.36570   | 2.72118   | Detected | Compromised | Detected | Compromised |
| 231 | A_23_P95231   | CASC1     | Hs.407771 | cancer susceptibility candidate 1                                            | Homo sapiens cancer susceptibility candidate 1 (CASC1), transcript variant 1, mRNA [NM_018272]                               | 15.88912 | up | 12.17471 | up | 56.61573   | 3.68953   | 43.11943   | 3.12306   | Detected | Compromised | Detected | Compromised |
| 232 | A_33_P3384078 |           |           |                                                                              | Adenylate kinase domain-containing protein 2 [Source:UniProtKB/Swiss-Prot;Accession:Q55283] [ENST00000355283]                | 15.83777 | up | 11.13639 | up | 81.36618   | 5.31965   | 72.64971   | 5.75248   | Detected | Compromised | Detected | Compromised |
| 233 | A_32_P108254  | FAM20A    | Hs.268874 | family with sequence similarity 20, member A                                 | Homo sapiens family with sequence similarity 20, member A (FAM20A), transcript variant 1, mRNA [NM_017565]                   | 15.80986 | up | 19.33295 | up | 2160.38400 | 141.49340 | 2084.30080 | 95.06654  | Detected | Detected    | Detected | Detected    |
| 234 | A_24_P131646  | MYL3      | Hs.517939 | myosin, light chain 3, alkali, ventricular, skeletal, slow                   | Homo sapiens myosin, light chain 3, alkali, ventricular, skeletal, slow (MYL3), mRNA [NM_000258]                             | 15.78626 | up | 11.41208 | up | 144.23552  | 9.46076   | 136.31840  | 10.53308  | Detected | Compromised | Detected | Compromised |
| 235 | A_33_P3291484 | ST8SIA4   | Hs.308628 | ST8 alpha-N-acetylneuraminidase alpha-2,8-sialyltransferase 4                | Homo sapiens ST8 alpha-N-acetylneuraminidase alpha-2,8-sialyltransferase 4 (ST8SIA4), transcript variant 1, mRNA [NM_005668] | 15.77099 | up | 23.52642 | up | 235.49402  | 15.46159  | 155.52869  | 5.82935   | Detected | Compromised | Detected | Compromised |
| 236 | A_33_P3320062 | PLD1      | Hs.382865 | phospholipase D1, phosphatidylcholine-specific                               | Homo sapiens phospholipase D1, phosphatidylcholine-specific (PLD1), transcript variant 1, mRNA [NM_002692]                   | 15.69643 | up | 9.63724  | up | 522.73880  | 34.48394  | 370.27994  | 33.87997  | Detected | Detected    | Detected | Detected    |
| 237 | A_23_P340263  | RNF175    | Hs.388364 | ring finger protein 175                                                      | Homo sapiens ring finger protein 175 (RNF175), mRNA [NM_173662]                                                              | 15.65216 | up | 14.79071 | up | 1145.89500 | 75.80601  | 1278.16940 | 76.20176  | Detected | Detected    | Detected | Detected    |
| 238 | A_33_P3854953 | LOC440117 | Hs.127100 | hypothetical gene supported by BC037858                                      | Homo sapiens hypothetical gene supported by BC037858, mRNA (cDNA clone IMAGE5272477) [BC037858]                              | 15.58360 | up | 2.45732  | up | 91.32793   | 6.06833   | 26.25056   | 9.41983   | Detected | Compromised | Detected | Compromised |
| 239 | A_33_P3209960 | RASGRP2   | Hs.99491  | RAS guanyl releasing protein 2 (calcium and DAG-regulated)                   | Homo sapiens RAS guanyl releasing protein 2 (calcium and DAG-regulated) (RASGRP2), transcript variant 2, mRNA [NM_153819]    | 15.55960 | up | 18.05850 | up | 1899.03060 | 126.37660 | 2270.63480 | 110.87439 | Detected | Detected    | Detected | Detected    |
| 240 | A_23_P48740   | DIO2      | Hs.202354 | deiodinase, iodothyronine, type II                                           | Homo sapiens deiodinase, iodothyronine, type II (DIO2), transcript variant 1, mRNA [NM_013989]                               | 15.54008 | up | 26.01893 | up | 2382.41240 | 158.74380 | 2019.19790 | 68.43132  | Detected | Detected    | Detected | Detected    |
| 241 | A_24_P270496  | NOVA1     | Hs.31588  | neuro-oncological ventral antigen 1                                          | Homo sapiens neuro-oncological ventral antigen 1 (NOVA1), transcript variant 3, mRNA [NM_006491]                             | 15.41141 | up | 29.73354 | up | 137.77759  | 9.25698   | 109.45982  | 3.24619   | Detected | Compromised | Detected | Compromised |
| 242 | A_23_P252556  | BAI3      | Hs.13261  | brain-specific angiogenesis inhibitor 3                                      | Homo sapiens brain-specific angiogenesis inhibitor 3 (BAI3), mRNA [NM_001704]                                                | 15.32081 | up | 10.76405 | up | 54.80786   | 3.70420   | 37.94757   | 3.10866   | Detected | Compromised | Detected | Compromised |
| 243 | A_24_P122137  | LIF       | Hs.2250   | leukemia inhibitory factor (cholinergic differentiation factor)              | Homo sapiens leukemia inhibitory factor (cholinergic differentiation factor) (LIF), mRNA [NM_002309]                         | 15.31744 | up | 15.11951 | up | 1810.80360 | 122.41039 | 1770.29370 | 103.24599 | Detected | Detected    | Detected | Detected    |



|     |               |           |           |                                                                                |                                                                                                                                    |          |    |          |    |              |             |              |             |          |             |          |             |
|-----|---------------|-----------|-----------|--------------------------------------------------------------------------------|------------------------------------------------------------------------------------------------------------------------------------|----------|----|----------|----|--------------|-------------|--------------|-------------|----------|-------------|----------|-------------|
| 244 | A_24_P350437  | THAP2     | Hs.720665 | THAP domain containing, apoptosis associated protein 2                         | Homo sapiens THAP domain containing, apoptosis associated protein 2 (THAP2), mRNA [NM_031435]                                      | 15.30183 | up | 7.74388  | up | 43.90980     | 2.97133     | 27.79999     | 3.16557     | Detected | Compromised | Detected | Compromised |
| 245 | A_33_P3364869 |           |           |                                                                                |                                                                                                                                    | 15.24554 | up | 17.77186 | up | 7328.43100   | 497.73868   | 5648.88670   | 280.28220   | Detected | Detected    | Detected | Detected    |
| 246 | A_33_P3227944 | C17orf69  | Hs.128813 | chromosome 17 open reading frame 69                                            | Homo sapiens chromosome 17 open reading frame 69 (C17orf69), transcript variant 2, non-coding RNA [NR_026906]                      | 15.17439 | up | 13.54736 | up | 1349.81790   | 92.10795    | 1015.02660   | 66.06757    | Detected | Detected    | Detected | Detected    |
| 247 | A_33_P3283824 | SLC39A8   | Hs.288034 | solute carrier family 39 (zinc transporter), member 8                          | Homo sapiens solute carrier family 39 (zinc transporter), member 8 (SLC39A8), transcript variant 3, mRNA [NM_001135147]            | 15.17165 | up | 9.05527  | up | 50.50548     | 3.44698     | 36.34823     | 3.53954     | Detected | Compromised | Detected | Compromised |
| 248 | A_33_P3308232 | LOC401630 |           | hypothetical LOC401630                                                         | Homo sapiens hypothetical LOC401630 (LOC401630), non-coding RNA [NR_002161]                                                        | 15.10849 | up | 11.64846 | up | 124.01547    | 8.49839     | 91.63625     | 6.93688     | Detected | Compromised | Detected | Compromised |
| 249 | A_23_P29096   | PDE9A     | Hs.473927 | phosphodiesterase 9A                                                           | Homo sapiens phosphodiesterase 9A (PDE9A), transcript variant 1, mRNA [NM_002606]                                                  | 15.09680 | up | 15.58961 | up | 433.75180    | 29.75018    | 438.25340    | 24.78880    | Detected | Detected    | Detected | Detected    |
| 250 | A_23_P417853  | MYO3B     | Hs.671900 | myosin III B                                                                   | Homo sapiens myosin III B (MYO3B), transcript variant 2, mRNA [NM_138995]                                                          | 15.09235 | up | 11.11161 | up | 50.28934     | 3.45026     | 36.54825     | 2.90038     | Detected | Compromised | Detected | Compromised |
| 251 | A_23_P134854  | CLDN23    | Hs.183617 | claudin 23                                                                     | Homo sapiens claudin 23 (CLDN23), mRNA [NM_194284]                                                                                 | 15.05430 | up | 14.75358 | up | 1764.39040   | 121.35770   | 1950.67290   | 116.58769   | Detected | Detected    | Detected | Detected    |
| 252 | A_33_P3375934 | NAMPT     | Hs.489615 | nicotinamide phosphoribosyltransferase                                         | Homo sapiens nicotinamide phosphoribosyltransferase (NAMPT), mRNA [NM_005746]                                                      | 15.04148 | up | 14.49525 | up | 26719.00800  | 1839.34390  | 19228.75800  | 1169.74430  | Detected | Detected    | Detected | Detected    |
| 253 | A_24_P307653  | SLC6A15   | Hs.44424  | solute carrier family 6 (neutral amino acid transporter), member 15            | Homo sapiens solute carrier family 6 (neutral amino acid transporter), member 15 (SLC6A15), transcript variant 1, mRNA [NM_182767] | 15.02631 | up | 17.51310 | up | 2143.47780   | 147.70651   | 1727.86880   | 86.99880    | Detected | Detected    | Detected | Detected    |
| 254 | A_33_P3354847 | C9orf171  | Hs.201709 | chromosome 9 open reading frame 171                                            | Homo sapiens chromosome 9 open reading frame 171 (C9orf171), mRNA [NM_207417]                                                      | 14.95810 | up | 22.35022 | up | 128.99500    | 8.92955     | 104.60102    | 4.12686     | Detected | Compromised | Detected | Compromised |
| 255 | A_23_P43337   | FREM1     | Hs.709555 | FRAS1 related extracellular matrix 1                                           | Homo sapiens FRAS1 related extracellular matrix 1 (FREM1), mRNA [NM_144966]                                                        | 14.78838 | up | 6.51907  | up | 58.50824     | 4.09666     | 43.25238     | 5.85045     | Detected | Compromised | Detected | Compromised |
| 256 | A_32_P88231   |           |           |                                                                                |                                                                                                                                    | 14.74764 | up | 12.52694 | up | 221.12338    | 15.52549    | 132.96002    | 9.35926     | Detected | Compromised | Detected | Compromised |
| 257 | A_23_P212469  | ENTPD3    | Hs.441145 | ectonucleoside triphosphate diphosphohydrolase 3                               | Homo sapiens ectonucleoside triphosphate diphosphohydrolase 3 (ENTPD3), mRNA [NM_001248]                                           | 14.74358 | up | 7.69741  | up | 227.86139    | 16.00298    | 176.23895    | 20.18937    | Detected | Compromised | Detected | Detected    |
| 258 | A_23_P78037   | CCL7      | Hs.251526 | chemokine (C-C motif) ligand 7                                                 | Homo sapiens chemokine (C-C motif) ligand 7 (CCL7), mRNA [NM_006273]                                                               | 14.73203 | up | 15.28368 | up | 243.96648    | 17.14749    | 236.21362    | 13.62833    | Detected | Detected    | Detected | Compromised |
| 259 | A_23_P392476  | AKD1      | Hs.205144 | adenylate kinase domain containing 1                                           | Homo sapiens adenylate kinase domain containing 1 (AKD1), transcript variant 1, mRNA [NM_001145128]                                | 14.69336 | up | 5.79418  | up | 45.02810     | 3.17319     | 26.56213     | 4.04237     | Detected | Compromised | Detected | Compromised |
| 260 | A_33_P3223592 | APOE      | Hs.654439 | apolipoprotein E                                                               | Homo sapiens apolipoprotein E (APOE), mRNA [NM_000041]                                                                             | 14.64105 | up | 12.61276 | up | 213789.52000 | 15119.84000 | 177031.81000 | 12376.75500 | Detected | Detected    | Detected | Detected    |
| 261 | A_23_P108075  | SLC7A10   | Hs.58679  | solute carrier family 7, (neutral amino acid transporter, y+ system) member 10 | Homo sapiens solute carrier family 7, (neutral amino acid transporter, y+ system) member 10 (SLC7A10), mRNA [NM_019849]            | 14.50091 | up | 10.57297 | up | 50.11593     | 3.57860     | 32.91339     | 2.74499     | Detected | Compromised | Detected | Compromised |
| 262 | A_33_P3382860 | RND2      | Hs.603111 | Rho family GTPase 2                                                            | Homo sapiens Rho family GTPase 2 (RND2), mRNA [NM_005440]                                                                          | 14.49278 | up | 9.16711  | up | 149.69434    | 10.69515    | 132.49510    | 12.74480    | Detected | Compromised | Detected | Compromised |
| 263 | A_33_P3871347 | SNED1     | Hs.471834 | sushi, nidogen and EGF-like domains 1                                          | Homo sapiens sushi, nidogen and EGF-like domains 1 (SNED1), mRNA [NM_001080437]                                                    | 14.49096 | up | 14.95887 | up | 29000.48800  | 2072.24560  | 29473.91000  | 1737.41860  | Detected | Detected    | Detected | Detected    |
| 264 | A_23_P41424   | SLC39A8   | Hs.288034 | solute carrier family 39 (zinc transporter), member 8                          | Homo sapiens solute carrier family 39 (zinc transporter), member 8 (SLC39A8), transcript variant 1, mRNA [NM_022154]               | 14.48727 | up | 14.44510 | up | 8019.47270   | 573.18195   | 7354.79350   | 448.96796   | Detected | Detected    | Detected | Detected    |
| 265 | A_23_P15450   | TMEM100   | Hs.173233 | transmembrane protein 100                                                      | Homo sapiens transmembrane protein 100 (TMEM100), transcript variant 2, mRNA [NM_018286]                                           | 14.47442 | up | 44.45409 | up | 225.82056    | 16.14026    | 227.26352    | 4.50800     | Detected | Compromised | Detected | Compromised |
| 266 | A_33_P3283964 |           | Hs.722996 |                                                                                | Putative uncharacterized protein ENSP00000355193 [Source:UniProtKB/TrEMBL;Acc:ABNI M1] [ENST00000442512]                           | 14.40344 | up | 16.50703 | up | 445.12600    | 32.00000    | 265.32480    | 14.17341    | Detected | Detected    | Detected | Detected    |
| 267 | A_33_P3365193 | AMY1C     | Hs.655232 | amylase, alpha 1C (salivary)                                                   | Homo sapiens amylase, alpha 1C (salivary) (AMY1C), mRNA [NM_001008219]                                                             | 14.29056 | up | 12.27161 | up | 852.28735    | 61.75469    | 670.78674    | 48.20017    | Detected | Detected    | Detected | Detected    |
| 268 | A_24_P102293  | SLITRK5   | Hs.591208 | SLIT and NTRK-like family, member 5                                            | Homo sapiens SLIT and NTRK-like family, member 5 (SLITRK5), mRNA [NM_015567]                                                       | 14.27035 | up | 9.13421  | up | 44.90061     | 3.25800     | 28.58114     | 2.75914     | Detected | Compromised | Detected | Compromised |
| 269 | A_23_P414654  | RAB37     | Hs.351413 | RAB37, member RAS oncogene family                                              | Homo sapiens RAB37, member RAS oncogene family (RAB37), transcript variant 3, mRNA [NM_175738]                                     | 14.13913 | up | 14.77893 | up | 265.10898    | 19.41489    | 282.82678    | 16.87497    | Detected | Detected    | Detected | Detected    |
| 270 | A_23_P65789   | MCTP2     | Hs.33368  | multiple C2 domains, transmembrane 2                                           | Homo sapiens multiple C2 domains, transmembrane 2 (MCTP2), transcript variant 1, mRNA [NM_018349]                                  | 14.09772 | up | 16.18181 | up | 78.35747     | 5.75526     | 49.24344     | 2.68341     | Detected | Compromised | Detected | Compromised |
| 271 | A_23_P42882   | CAMK2B    | Hs.351887 | calcium/calmodulin-dependent protein kinase II beta                            | Homo sapiens calcium/calmodulin-dependent protein kinase II beta (CAMK2B), transcript variant 6, mRNA [NM_172082]                  | 14.07956 | up | 10.69363 | up | 548.92523    | 40.36987    | 601.17320    | 49.57243    | Detected | Detected    | Detected | Detected    |
| 272 | A_23_P207632  | ATP2A3    | Hs.513870 | ATPase, Ca++ transporting, ubiquitous                                          | Homo sapiens ATPase, Ca++ transporting, ubiquitous (ATP2A3), transcript variant 5, mRNA [NM_174953]                                | 14.07836 | up | 11.09807 | up | 582.04010    | 42.80889    | 392.92307    | 31.21948    | Detected | Detected    | Detected | Detected    |
| 273 | A_23_P748     | IRF6      | Hs.591415 | interferon regulatory factor 6                                                 | Homo sapiens interferon regulatory factor 6 (IRF6), mRNA [NM_006147]                                                               | 14.00593 | up | 10.63017 | up | 42.24844     | 3.12343     | 31.67430     | 2.62744     | Detected | Compromised | Detected | Compromised |
| 274 | A_33_P3378790 | CASC1     | Hs.407771 | cancer susceptibility candidate 1                                              | Homo sapiens cancer susceptibility candidate 1 (CASC1), transcript variant 3, mRNA [NM_001082972]                                  | 13.99620 | up | 9.70065  | up | 48.57039     | 3.59331     | 33.91716     | 3.08308     | Detected | Compromised | Detected | Compromised |

|     |               |           |           |                                                                                         |                                                                                                                                                                            |          |    |          |    |             |            |             |            |          |             |          |             |
|-----|---------------|-----------|-----------|-----------------------------------------------------------------------------------------|----------------------------------------------------------------------------------------------------------------------------------------------------------------------------|----------|----|----------|----|-------------|------------|-------------|------------|----------|-------------|----------|-------------|
| 275 | A_24_P592012  | ZBTB46    | Hs.585028 | zinc finger and BTB domain containing 46                                                | Zinc finger and BTB domain-containing protein 46 (BTB/POZ domain-containing protein 4)(Zinc finger protein 340) [Source:UniProtKB/Swiss-Prot;Acc:Q86U28] [ENST00000245663] | 13.86121 | up | 17.09782 | up | 100.55039   | 7.51131    | 62.70635    | 3.23397    | Detected | Compromised | Detected | Compromised |
| 276 | A_33_P3349761 |           |           |                                                                                         |                                                                                                                                                                            | 13.84120 | up | 7.18725  | up | 43.08311    | 3.22305    | 56.32444    | 6.91035    | Detected | Compromised | Detected | Compromised |
| 277 | A_32_P36143   | LOC729088 | Hs.416013 | hypothetical protein LOC729088                                                          | PREDICTED: Homo sapiens hypothetical protein LOC729088 (LOC729088). miscRNA [XR_078341]                                                                                    | 13.81794 | up | 24.92972 | up | 232.55809   | 17.42694   | 159.74730   | 5.65043    | Detected | Detected    | Detected | Compromised |
| 278 | A_24_P303145  | ANKH      | Hs.156727 | ankylosis, progressive homolog (mouse)                                                  | Homo sapiens ankylosis, progressive homolog (mouse) (ANKH). mRNA [NM_054027]                                                                                               | 13.81610 | up | 15.95897 | up | 8222.79500  | 616.26434  | 5899.31600  | 325.95840  | Detected | Detected    | Detected | Detected    |
| 279 | A_23_P76749   | GALNTL1   | Hs.21035  | UDP-N-acetyl-alpha-D-galactosamine:polypeptide N-acetylgalactosaminyltransferase-like 1 | Homo sapiens UDP-N-acetyl-alpha-D-galactosamine:polypeptide N-acetylgalactosaminyltransferase-like 1 (GALNTL1). mRNA [NM_020682]                                           | 13.79476 | up | 14.68780 | up | 1317.66990  | 98.90668   | 1273.81790  | 76.47443   | Detected | Detected    | Detected | Detected    |
| 280 | A_23_P23611   | AMY1C     | Hs.655232 | amylase, alpha 1C (salivary)                                                            | Homo sapiens amylase, alpha 1C (salivary) (AMY1C). mRNA [NM_001008219]                                                                                                     | 13.76373 | up | 11.49081 | up | 1353.09200  | 101.79452  | 944.50604   | 72.48026   | Detected | Detected    | Detected | Detected    |
| 281 | A_24_P390668  | FMNL1     | Hs.720131 | formin-like 1                                                                           | Homo sapiens formin-like 1 (FMNL1). mRNA [NM_005892]                                                                                                                       | 13.70310 | up | 6.07807  | up | 107.11089   | 8.09372    | 170.83469   | 24.78425   | Detected | Compromised | Detected | Detected    |
| 282 | A_23_P13753   | NFE2      | Hs.75643  | nuclear factor (erythroid-derived 2), 45kDa                                             | Homo sapiens nuclear factor (erythroid-derived 2), 45kDa (NFE2). transcript variant 1. mRNA [NM_006163]                                                                    | 13.70127 | up | 18.28596 | up | 199.92067   | 15.10880   | 194.15591   | 9.36264    | Detected | Compromised | Detected | Compromised |
| 283 | A_33_P3311750 | CCDC144A  | Hs.721149 | coiled-coil domain containing 144A                                                      | Homo sapiens coiled-coil domain containing 144A (CCDC144A). mRNA [NM_014689]                                                                                               | 13.65329 | up | 6.98650  | up | 99.35824    | 7.53528    | 44.80317    | 5.65477    | Detected | Compromised | Detected | Compromised |
| 284 | A_33_P3347343 | CCDC102B  | Hs.280781 | coiled-coil domain containing 102B                                                      | Homo sapiens coiled-coil domain containing 102B (CCDC102B). transcript variant 1. mRNA [NM_001093729]                                                                      | 13.65265 | up | 7.74551  | up | 77.50802    | 5.87845    | 68.13087    | 7.75639    | Detected | Compromised | Detected | Compromised |
| 285 | A_33_P3218649 | GPM6B     | Hs.495710 | glycoprotein M6B                                                                        | Homo sapiens glycoprotein M6B (GPM6B). transcript variant 1. mRNA [NM_001001995]                                                                                           | 13.59791 | up | 13.03356 | up | 28022.99400 | 2133.90670 | 22387.32600 | 1514.62400 | Detected | Detected    | Detected | Detected    |
| 286 | A_23_P206280  | GPR56     | Hs.513633 | G protein-coupled receptor 56                                                           | Homo sapiens G protein-coupled receptor 56 (GPR56). transcript variant 3. mRNA [NM_201525]                                                                                 | 13.59210 | up | 11.97638 | up | 10218.61800 | 778.46450  | 7705.78900  | 567.35785  | Detected | Detected    | Detected | Detected    |
| 287 | A_33_P3369058 | LRRK2     | Hs.187636 | leucine-rich repeat kinase 2                                                            | Homo sapiens leucine-rich repeat kinase 2 (LRRK2). mRNA [NM_198578]                                                                                                        | 13.55443 | up | 15.82110 | up | 380.78506   | 29.08921   | 272.88240   | 15.20913   | Detected | Detected    | Detected | Detected    |
| 288 | A_23_P386384  | C1orf87   | Hs.47385  | chromosome 1 open reading frame 87                                                      | Homo sapiens chromosome 1 open reading frame 87 (C1orf87). mRNA [NM_152377]                                                                                                | 13.52864 | up | 11.27687 | up | 55.31427    | 4.23366    | 48.83391    | 3.81855    | Detected | Compromised | Detected | Compromised |
| 289 | A_23_P136936  | SYP       | Hs.632804 | synaptophysin                                                                           | Homo sapiens synaptophysin (SYP). mRNA [NM_003179]                                                                                                                         | 13.49859 | up | 15.68671 | up | 51.06352    | 3.91702    | 59.05452    | 3.31961    | Detected | Compromised | Detected | Compromised |
| 290 | A_33_P3364864 | NAMPT     | Hs.489615 | nicotinamide phosphoribosyltransferase                                                  | Homo sapiens nicotinamide phosphoribosyltransferase (NAMPT). mRNA [NM_005746]                                                                                              | 13.45482 | up | 13.70757 | up | 2450.68820  | 188.60071  | 2941.43900  | 189.21902  | Detected | Detected    | Detected | Detected    |
| 291 | A_23_P149189  | ZP4       | Hs.136241 | zona pellucida glycoprotein 4                                                           | Homo sapiens zona pellucida glycoprotein 4 (ZP4). mRNA [NM_021186]                                                                                                         | 13.45369 | up | 15.25292 | up | 196.96684   | 15.15949   | 187.11588   | 10.81741   | Detected | Compromised | Detected | Compromised |
| 292 | A_23_P57155   | CHGB      | Hs.516874 | chromogranin B (secretogranin 1)                                                        | Homo sapiens chromogranin B (secretogranin 1) (CHGB). mRNA [NM_001819]                                                                                                     | 13.32786 | up | 9.76589  | up | 100.27039   | 7.79014    | 101.51112   | 9.16573    | Detected | Compromised | Detected | Compromised |
| 293 | A_33_P3397865 | TNNT1     | Hs.631558 | troponin T type 1 (skeletal, slow)                                                      | Homo sapiens troponin T type 1 (skeletal, slow) (TNNT1). transcript variant 1. mRNA [NM_003283]                                                                            | 13.32465 | up | 11.63226 | up | 4095.03610  | 318.22552  | 4024.74560  | 305.09824  | Detected | Detected    | Detected | Detected    |
| 294 | A_23_P347169  | MTUS1     | Hs.7946   | microtubule associated tumor suppressor 1                                               | Homo sapiens microtubule associated tumor suppressor 1 (MTUS1). transcript variant 1. mRNA [NM_001001924]                                                                  | 13.20848 | up | 7.99117  | up | 45.87645    | 3.59642    | 27.55657    | 3.04075    | Detected | Compromised | Detected | Compromised |
| 295 | A_23_P216448  | NFIB      | Hs.644095 | nuclear factor 1/B                                                                      | Homo sapiens nuclear factor 1/B (NFIB). mRNA [NM_005596]                                                                                                                   | 13.20284 | up | 12.47033 | up | 743.03174   | 58.27377   | 560.78570   | 39.65376   | Detected | Detected    | Detected | Detected    |
| 296 | A_32_P50223   | PLK5P     | Hs.195352 | polo-like kinase 5 pseudogene                                                           | Homo sapiens polo-like kinase 5 pseudogene (PLK5P). non-coding RNA [NR_026557]                                                                                             | 13.16503 | up | 11.32671 | up | 167.70512   | 13.19038   | 121.56341   | 9.46378    | Detected | Compromised | Detected | Compromised |
| 297 | A_33_P3725324 | USP9Y     | Hs.598540 | ubiquitin specific peptidase 9, Y-linked                                                | Homo sapiens ubiquitin specific peptidase 9, Y-linked (USP9Y). mRNA [NM_004654]                                                                                            | 13.14798 | up | 12.81610 | up | 38.07638    | 2.99868    | 35.94472    | 2.47312    | Detected | Compromised | Detected | Compromised |
| 298 | A_33_P3212172 | SNX22     | Hs.708268 | sorting nexin 22                                                                        | Homo sapiens sorting nexin 22 (SNX22). mRNA [NM_024798]                                                                                                                    | 13.14327 | up | 11.05008 | up | 40.37183    | 3.18059    | 33.23529    | 2.65216    | Detected | Compromised | Detected | Compromised |
| 299 | A_23_P25706   | CLMN      | Hs.301478 | calmin (calponin-like, transmembrane)                                                   | Homo sapiens calmin (calponin-like, transmembrane) (CLMN). mRNA [NM_024734]                                                                                                | 13.14211 | up | 9.79910  | up | 275.35977   | 21.69544   | 269.68890   | 24.26848   | Detected | Detected    | Detected | Detected    |
| 300 | A_24_P224727  | CEBPA     | Hs.699463 | CCAAT/enhancer binding protein (C/EBP), alpha                                           | Homo sapiens CCAAT/enhancer binding protein (C/EBP), alpha (CEBPA). mRNA [NM_004364]                                                                                       | 13.10156 | up | 7.96280  | up | 792.61420   | 62.64290   | 731.16410   | 80.96820   | Detected | Detected    | Detected | Detected    |
| 301 | A_24_P170983  | ESPNL     | Hs.127724 | espin-like                                                                              | Homo sapiens espin-like (ESPNL). mRNA [NM_194312]                                                                                                                          | 13.08612 | up | 11.43897 | up | 3088.87940  | 244.41240  | 3319.10820  | 255.85866  | Detected | Detected    | Detected | Detected    |
| 302 | A_33_P3266674 | ZBTB46    | Hs.585028 | zinc finger and BTB domain containing 46                                                | Homo sapiens zinc finger and BTB domain containing 46 (ZBTB46). mRNA [NM_025224]                                                                                           | 13.05072 | up | 12.13737 | up | 242.48145   | 19.23876   | 238.95975   | 17.36064   | Detected | Detected    | Detected | Detected    |
| 303 | A_23_P334857  | ZNF385B   | Hs.655005 | zinc finger protein 385B                                                                | Homo sapiens zinc finger protein 385B (ZNF385B). transcript variant 1. mRNA [NM_152520]                                                                                    | 13.03578 | up | 9.44226  | up | 39.53168    | 3.14008    | 28.19162    | 2.63275    | Detected | Compromised | Detected | Compromised |
| 304 | A_24_P7121    | NSUN7     | Hs.570821 | NOL1/NOP2/Sun domain family, member 7                                                   | Homo sapiens NOL1/NOP2/Sun domain family, member 7 (NSUN7). mRNA [NM_024677]                                                                                               | 12.90857 | up | 7.35239  | up | 37.31111    | 2.99291    | 20.51969    | 2.46098    | Detected | Compromised | Detected | Compromised |
| 305 | A_23_P428298  | UNC5CL    | Hs.158357 | unc-5 homolog C (C. elegans)-like                                                       | Homo sapiens unc-5 homolog C (C. elegans)-like (UNC5CL). mRNA [NM_173561]                                                                                                  | 12.90159 | up | 10.57598 | up | 90.28457    | 7.24609    | 61.76273    | 5.14957    | Detected | Compromised | Detected | Compromised |

|     |               |           |           |                                                                                  |                                                                                                                                                                                             |          |    |          |    |             |            |             |            |          |             |             |             |
|-----|---------------|-----------|-----------|----------------------------------------------------------------------------------|---------------------------------------------------------------------------------------------------------------------------------------------------------------------------------------------|----------|----|----------|----|-------------|------------|-------------|------------|----------|-------------|-------------|-------------|
| 306 | A_33_P3226995 | CD7       | Hs.36972  | CD7 molecule                                                                     | Homo sapiens CD7 molecule (CD7), mRNA [NM_006137]                                                                                                                                           | 12.89459 | up | 69.95476 | up | 438.65160   | 35.22453   | 340.17343   | 4.28794    | Detected | Detected    | Detected    | Compromised |
| 307 | A_33_P3317613 | SYN2      | Hs.445503 | synapsin II                                                                      | Homo sapiens synapsin II (SYN2), transcript variant 1a, mRNA [NM_133625]                                                                                                                    | 12.85199 | up | 18.44367 | up | 131.70909   | 10.61154   | 102.00219   | 4.87672    | Detected | Compromised | Detected    | Compromised |
| 308 | A_23_P421811  | C20orf132 | Hs.349125 | chromosome 20 open reading frame 132                                             | Homo sapiens chromosome 20 open reading frame 132 (C20orf132), transcript variant 1, mRNA [NM_152933]                                                                                       | 12.84612 | up | 9.23524  | up | 269.55347   | 21.72731   | 216.83226   | 20.70338   | Detected | Detected    | Detected    | Detected    |
| 309 | A_33_P3355946 |           |           |                                                                                  |                                                                                                                                                                                             | 12.80525 | up | 9.06953  | up | 38.25811    | 3.09363    | 31.96529    | 3.10784    | Detected | Compromised | Detected    | Compromised |
| 310 | A_23_P426663  | MITF      | Hs.166017 | microphthalmia-associated transcription factor                                   | Homo sapiens microphthalmia-associated transcription factor (MITF), transcript variant 1, mRNA [NM_198159]                                                                                  | 12.80226 | up | 16.14208 | up | 549.13640   | 44.41470   | 367.20917   | 20.05947   | Detected | Detected    | Detected    | Detected    |
| 311 | A_23_P150609  | IGF2      | Hs.272259 | insulin-like growth factor 2 (somatomedin A)                                     | Homo sapiens insulin-like growth factor 2 (somatomedin A) (IGF2), transcript variant 1, mRNA [NM_000612]                                                                                    | 12.70947 | up | 10.49984 | up | 64196.12500 | 5230.15230 | 42567.65600 | 3574.88800 | Detected | Detected    | Detected    | Detected    |
| 312 | A_23_P153964  | INHBB     | Hs.1735   | inhibin, beta B                                                                  | Homo sapiens inhibin, beta B (INHBB), mRNA [NM_002193]                                                                                                                                      | 12.63014 | up | 11.19111 | up | 1161.98900  | 95.26359   | 1057.78110  | 83.34669   | Detected | Detected    | Detected    | Detected    |
| 313 | A_33_P3374623 | ABCA7     | Hs.134514 | ATP-binding cassette, sub-family A (ABC1), member 7                              | Homo sapiens ATP-binding cassette, sub-family A (ABC1), member 7 (ABCA7), mRNA [NM_019112]                                                                                                  | 12.58678 | up | 12.72510 | up | 312.98970   | 25.74829   | 378.68980   | 26.24146   | Detected | Detected    | Detected    | Detected    |
| 314 | A_33_P3209962 | RASGRP2   | Hs.99491  | RAS guanyl releasing protein 2 (calcium and DAG-regulated)                       | Homo sapiens RAS guanyl releasing protein 2 (calcium and DAG-regulated) (RASGRP2), transcript variant 2, mRNA [NM_153819]                                                                   | 12.56661 | up | 17.65408 | up | 753.44965   | 62.08250   | 906.86570   | 45.29638   | Detected | Detected    | Detected    | Detected    |
| 315 | A_33_P3723580 | LOC339975 | Hs.639361 | hypothetical protein LOC339975                                                   | Homo sapiens hypothetical protein LOC339975, mRNA (cDNA clone IMAGE5548761), partial cds [BC042049]                                                                                         | 12.51843 | up | 7.42321  | up | 47.22739    | 3.90641    | 27.87228    | 3.31090    | Detected | Compromised | Detected    | Compromised |
| 316 | A_24_P248185  | C12orf53  | Hs.44067  | chromosome 12 open reading frame 53                                              | Homo sapiens chromosome 12 open reading frame 53 (C12orf53), mRNA [NM_153685]                                                                                                               | 12.49081 | up | 11.59670 | up | 1478.97810  | 122.60394  | 787.68616   | 59.89415   | Detected | Detected    | Detected    | Detected    |
| 317 | A_24_P411121  | TNFRSF18  | Hs.212680 | tumor necrosis factor receptor superfamily, member 18                            | Homo sapiens tumor necrosis factor receptor superfamily, member 18 (TNFRSF18), transcript variant 2, mRNA [NM_148901]                                                                       | 12.43651 | up | 19.00104 | up | 383.77170   | 31.95271   | 386.92190   | 17.95608   | Detected | Detected    | Detected    | Detected    |
| 318 | A_33_P3310189 | ADRB1     | Hs.99913  | adrenergic, beta-1-, receptor                                                    | Homo sapiens adrenergic, beta-1-, receptor (ADRB1), mRNA [NM_000684]                                                                                                                        | 12.42670 | up | 10.40225 | up | 37.56814    | 3.13038    | 30.74129    | 2.60592    | Detected | Compromised | Detected    | Compromised |
| 319 | A_33_P3239185 | SYT7      | Hs.502730 | synaptotagmin VII                                                                | Homo sapiens synaptotagmin VII (SYT7), mRNA [NM_004200]                                                                                                                                     | 12.38018 | up | 13.01602 | up | 1937.53640  | 162.05264  | 1367.36980  | 92.63463   | Detected | Detected    | Detected    | Detected    |
| 320 | A_24_P321766  | SERPINA5  | Hs.159628 | serpin peptidase inhibitor, clade A (alpha-1 antitrypsin, antitrypsin), member 5 | Homo sapiens serpin peptidase inhibitor, clade A (alpha-1 antitrypsin, antitrypsin), member 5 (SERPINA5), mRNA [NM_000624]                                                                  | 12.35275 | up | 5.03303  | up | 38.37420    | 3.21669    | 34.30006    | 6.00940    | Detected | Compromised | Detected    | Compromised |
| 321 | A_32_P83784   | ARAP2     | Hs.479451 | ArfGAP with RhoGAP domain, ankyrin repeat and PH domain 2                        | Homo sapiens ArfGAP with RhoGAP domain, ankyrin repeat and PH domain 2 (ARAP2), mRNA [NM_015230]                                                                                            | 12.31989 | up | 9.16298  | up | 36.46962    | 3.06519    | 26.73872    | 2.57318    | Detected | Compromised | Detected    | Compromised |
| 322 | A_33_P3246885 | DMKN      | Hs.417795 | dermokine                                                                        | Homo sapiens dermokine (DMKN), transcript variant 3, mRNA [NM_001126056]                                                                                                                    | 12.31044 | up | 24.94187 | up | 4826.60350  | 405.97660  | 5578.00240  | 197.20377  | Detected | Detected    | Detected    | Detected    |
| 323 | A_23_P501933  | CACNG6    | Hs.631560 | calcium channel, voltage-dependent, gamma subunit 6                              | Homo sapiens calcium channel, voltage-dependent, gamma subunit 6 (CACNG6), transcript variant 1, mRNA [NM_145814]                                                                           | 12.28915 | up | 22.41440 | up | 358.90784   | 30.24085   | 334.77650   | 13.17023   | Detected | Detected    | Detected    | Compromised |
| 324 | A_24_P6125    | KCNJ4     | Hs.32505  | potassium inwardly-rectifying channel, subfamily J, member 4                     | Homo sapiens potassium inwardly-rectifying channel, subfamily J, member 4 (KCNJ4), transcript variant 1, mRNA [NM_152888]                                                                   | 12.25405 | up | 15.31211 | up | 54.32608    | 4.59052    | 42.75810    | 2.46235    | Detected | Compromised | Detected    | Compromised |
| 325 | A_24_P122921  | BCL2L1    | Hs.469658 | BCL2-like 11 (apoptosis facilitator)                                             | Homo sapiens BCL2-like 11 (apoptosis facilitator) (BCL2L1), transcript variant 1, mRNA [NM_138621]                                                                                          | 12.20752 | up | 12.94587 | up | 1824.21410  | 154.73251  | 1361.43690  | 92.73245   | Detected | Detected    | Detected    | Detected    |
| 326 | A_33_P3365750 | EML5      | Hs.558671 | echinoderm microtubule associated protein like 5                                 | Homo sapiens echinoderm microtubule associated protein like 5 (EML5), mRNA [NM_183387]                                                                                                      | 12.18421 | up | 6.09295  | up | 42.74799    | 3.63289    | 22.00829    | 3.18511    | Detected | Compromised | Detected    | Compromised |
| 327 | A_23_P45185   | FIGF      | Hs.11392  | c-fos induced growth factor (vascular endothelial growth factor D)               | Homo sapiens c-fos induced growth factor (vascular endothelial growth factor D) (FIGF), mRNA [NM_004469]                                                                                    | 12.11088 | up | 7.40567  | up | 37.73736    | 3.22648    | 22.50844    | 2.68007    | Detected | Compromised | Detected    | Compromised |
| 328 | A_23_P392738  | DAZ2      | Hs.592257 | deleted in azoospermia 2                                                         | Homo sapiens deleted in azoospermia 2 (DAZ2), transcript variant 2, mRNA [NM_001005785]                                                                                                     | 12.10560 | up | 3.35183  | up | 40.79509    | 3.48943    | 12.92762    | 3.40097    | Detected | Compromised | Compromised | Compromised |
| 329 | A_23_P125588  | TNMD      | Hs.132957 | tenomodulin                                                                      | Homo sapiens tenomodulin (TNMD), mRNA [NM_022144]                                                                                                                                           | 12.10195 | up | 10.22953 | up | 34.44680    | 2.94732    | 28.06541    | 2.41925    | Detected | Compromised | Detected    | Compromised |
| 330 | A_23_P145786  | MLXIPL    | Hs.647055 | MLX interacting protein-like                                                     | Homo sapiens MLX interacting protein-like (MLXIPL), transcript variant 1, mRNA [NM_032951]                                                                                                  | 12.08586 | up | 15.49834 | up | 186.47588   | 15.97638   | 154.20868   | 8.77383    | Detected | Detected    | Detected    | Compromised |
| 331 | A_33_P3531970 | LOC643542 | Hs.652901 | hypothetical protein LOC643542                                                   | Homo sapiens hypothetical protein LOC643542, mRNA (cDNA clone IMAGE5192916) [BC053410]                                                                                                      | 12.04224 | up | 6.94601  | up | 35.09199    | 3.01741    | 19.52180    | 2.47828    | Detected | Compromised | Detected    | Compromised |
| 332 | A_24_P515319  | FAM90A7   | Hs.715411 | family with sequence similarity 90, member A7                                    | Homo sapiens family with sequence similarity 90, member A7 (FAM90A7), mRNA [NM_001136572]                                                                                                   | 12.00210 | up | 17.24830 | up | 335.25464   | 28.92349   | 316.86030   | 16.19896   | Detected | Detected    | Detected    | Detected    |
| 333 | A_24_P109214  | APOC1     | Hs.110675 | apolipoprotein C-1                                                               | Homo sapiens apolipoprotein C-1 (APOC1), mRNA [NM_001645]                                                                                                                                   | 11.97815 | up | 12.25198 | up | 3813.63400  | 329.67236  | 2614.95170  | 188.20149  | Detected | Detected    | Detected    | Detected    |
| 334 | A_33_P3263497 |           |           |                                                                                  | Sushi, nidogen and EGF-like domain-containing protein 1. Precursor (Insulin-responsive sequence DNA-binding protein 1) (IRE-BP1) [Source:UniProtKB/Swiss-Prot;Acc:Q8TER0] [ENST00000401884] | 11.96735 | up | 13.17509 | up | 779.20330   | 67.41958   | 841.68207   | 56.33265   | Detected | Detected    | Detected    | Detected    |

|     |               |             |           |                                                                                 |                                                                                                                                               |          |    |          |    |             |            |            |           |          |             |             |             |
|-----|---------------|-------------|-----------|---------------------------------------------------------------------------------|-----------------------------------------------------------------------------------------------------------------------------------------------|----------|----|----------|----|-------------|------------|------------|-----------|----------|-------------|-------------|-------------|
| 335 | A_23_P165788  | PHOSPHO2    | Hs.655150 | phosphatase, orphan 2                                                           | Homo sapiens phosphatase, orphan 2 (PHOSPHO2), mRNA [NM_001008489]                                                                            | 11.94623 | up | 10.98770 | up | 262451440   | 227.48424  | 2228.56540 | 178.84800 | Detected | Detected    | Detected    | Detected    |
| 336 | A_23_P149858  | ELOVL3      | Hs.302130 | elongation of very long chain fatty acids (FEN1/Elo2, SUR4/Elo3, yeast)-like 3  | Homo sapiens elongation of very long chain fatty acids (FEN1/Elo2, SUR4/Elo3, yeast)-like 3 (ELOVL3), mRNA [NM_152310]                        | 11.86257 | up | 10.54188 | up | 221.83790   | 19.36378   | 259.45157  | 21.70221  | Detected | Detected    | Detected    | Detected    |
| 337 | A_23_P149064  | PTPRU       | Hs.19718  | protein tyrosine phosphatase, receptor type, U                                  | Homo sapiens protein tyrosine phosphatase, receptor type, U (PTPRU), transcript variant 3, mRNA [NM_005704]                                   | 11.85507 | up | 12.43588 | up | 687.14777   | 60.01766   | 621.86780  | 44.09478  | Detected | Detected    | Detected    | Detected    |
| 338 | A_32_P94160   | PRKAA2      | Hs.437039 | protein kinase, AMP-activated, alpha 2 catalytic subunit                        | Homo sapiens protein kinase, AMP-activated, alpha 2 catalytic subunit (PRKAA2), mRNA [NM_006252]                                              | 11.82062 | up | 8.44890  | up | 53.61281    | 4.69636    | 27.89293   | 2.91112   | Detected | Compromised | Detected    | Compromised |
| 339 | A_33_P3320159 | GSDMC       | Hs.133244 | gasdermin C                                                                     | Homo sapiens gasdermin C (GSDMC), mRNA [NM_031415]                                                                                            | 11.81687 | up | 2.74925  | up | 35.77604    | 3.13489    | 9.35923    | 3.00187   | Detected | Compromised | Compromised | Compromised |
| 340 | A_33_P3420862 | PAGE2B      | Hs.293317 | P antigen family, member 2B                                                     | Homo sapiens P antigen family, member 2B (PAGE2B), mRNA [NM_001015038]                                                                        | 11.79107 | up | 13.03769 | up | 51.24704    | 4.50037    | 37.86754   | 2.56113   | Detected | Compromised | Detected    | Compromised |
| 341 | A_33_P3320079 | NFIB        | Hs.644095 | nuclear factor I/B                                                              | Homo sapiens nuclear factor I/B (NFIB), mRNA [NM_005596]                                                                                      | 11.77349 | up | 11.11541 | up | 295.99106   | 26.03193   | 284.66965  | 22.58297  | Detected | Detected    | Detected    | Detected    |
| 342 | A_24_P10226   | SEMA6D      | Hs.511265 | sema domain, transmembrane domain (TM), and cytoplasmic domain, (semaphorin) 6D | Homo sapiens sema domain, transmembrane domain (TM), and cytoplasmic domain, (semaphorin) 6D (SEMA6D), transcript variant 6, mRNA [NM_024966] | 11.75831 | up | 3.90316  | up | 41.98612    | 3.69738    | 19.02612   | 4.29832   | Detected | Compromised | Detected    | Compromised |
| 343 | A_33_P3210099 | ALPK3       | Hs.459183 | alpha-kinase 3                                                                  | Homo sapiens alpha-kinase 3 (ALPK3), mRNA [NM_020778]                                                                                         | 11.73128 | up | 5.45540  | up | 70.29649    | 6.20471    | 31.45920   | 5.08495   | Detected | Compromised | Detected    | Compromised |
| 344 | A_33_P3251492 | hCG_1994695 |           | similar to hCG1994695                                                           | Homo sapiens similar to hCG1994695 (LOC100133669), non-coding RNA [NR_026913]                                                                 | 11.72778 | up | 13.62956 | up | 325.67563   | 28.75427   | 233.40407  | 15.10053  | Detected | Detected    | Detected    | Compromised |
| 345 | A_33_P3211666 | IL18R1      | Hs.469521 | interleukin 18 receptor 1                                                       | Homo sapiens interleukin 18 receptor 1 (IL18R1), mRNA [NM_003855]                                                                             | 11.72612 | up | 20.75935 | up | 72.12494    | 6.36890    | 59.36427   | 2.52161   | Detected | Compromised | Detected    | Compromised |
| 346 | A_23_P378416  | GPM6B       | Hs.495710 | glycoprotein M6B                                                                | Homo sapiens glycoprotein M6B (GPM6B), transcript variant 2, mRNA [NM_001001996]                                                              | 11.72039 | up | 12.03249 | up | 17453.87700 | 1541.99450 | 9502.02800 | 696.34796 | Detected | Detected    | Detected    | Detected    |
| 347 | A_33_P3299066 | NR4A2       | Hs.563344 | nuclear receptor subfamily 4, group A, member 2                                 | Homo sapiens nuclear receptor subfamily 4, group A, member 2 (NR4A2), mRNA [NM_006186]                                                        | 11.71749 | up | 17.23327 | up | 703.23956   | 62.14436   | 714.76166  | 36.57287  | Detected | Detected    | Detected    | Detected    |
| 348 | A_33_P3319967 | ARG1        | Hs.440934 | arginase, liver                                                                 | Homo sapiens arginase, liver (ARG1), mRNA [NM_000045]                                                                                         | 11.68063 | up | 11.18537 | up | 34.73758    | 3.07940    | 32.85294   | 2.58994   | Detected | Compromised | Detected    | Compromised |
| 349 | A_23_P143247  | TSHZ2       | Hs.473117 | teashirt zinc finger homeobox 2                                                 | Homo sapiens teashirt zinc finger homeobox 2 (TSHZ2), mRNA [NM_173485]                                                                        | 11.60447 | up | 7.70209  | up | 237.28267   | 21.17259   | 189.07724  | 21.64692  | Detected | Detected    | Detected    | Detected    |
| 350 | A_33_P3320082 | NFIB        | Hs.644095 | nuclear factor I/B                                                              | Homo sapiens nuclear factor I/B (NFIB), mRNA [NM_005596]                                                                                      | 11.55030 | up | 14.37200 | up | 134.71878   | 12.07725   | 99.95924   | 6.13298   | Detected | Compromised | Detected    | Compromised |
| 351 | A_32_P112592  | LOC339524   |           | hypothetical LOC339524                                                          | Homo sapiens hypothetical LOC339524 (LOC339524), transcript variant 5, non-coding RNA [NR_026989]                                             | 11.53217 | up | 12.94134 | up | 1059.45430  | 95.12710   | 653.98390  | 44.56083  | Detected | Detected    | Detected    | Detected    |
| 352 | A_33_P3422289 |             |           |                                                                                 |                                                                                                                                               | 11.52742 | up | 13.96167 | up | 1174.75870  | 105.52359  | 924.01980  | 58.35923  | Detected | Detected    | Detected    | Detected    |
| 353 | A_23_P40108   | COL9A3      | Hs.716639 | collagen, type IX, alpha 3                                                      | Homo sapiens collagen, type IX, alpha 3 (COL9A3), mRNA [NM_001853]                                                                            | 11.52205 | up | 11.16829 | up | 1469.43380  | 132.05458  | 1365.08750 | 107.78027 | Detected | Detected    | Detected    | Detected    |
| 354 | A_23_P421306  | SYT12       | Hs.287636 | synaptotagmin XII                                                               | Homo sapiens synaptotagmin XII (SYT12), mRNA [NM_177963]                                                                                      | 11.49538 | up | 27.55599 | up | 141.13390   | 12.71280   | 106.00036  | 3.39201   | Detected | Compromised | Detected    | Compromised |
| 355 | A_33_P3240018 | PDE3B       | Hs.445711 | phosphodiesterase 3B, cGMP-inhibited                                            | Homo sapiens phosphodiesterase 3B, cGMP-inhibited (PDE3B), mRNA [NM_000922]                                                                   | 11.49484 | up | 1.94775  | up | 242.72777   | 21.86501   | 188.31978  | 85.25655  | Detected | Detected    | Detected    | Detected    |
| 356 | A_33_P3408042 | OR2K2       | Hs.381312 | olfactory receptor, family 2, subfamily K, member 2                             | Homo sapiens olfactory receptor, family 2, subfamily K, member 2 (OR2K2), mRNA [NM_205859]                                                    | 11.42644 | up | 9.28767  | up | 40.01284    | 3.62595    | 33.20751   | 3.15279   | Detected | Compromised | Detected    | Compromised |
| 357 | A_24_P79040   | CAPN12      | Hs.712632 | calpain 12                                                                      | Homo sapiens calpain 12 (CAPN12), mRNA [NM_144691]                                                                                            | 11.34787 | up | 30.22135 | up | 80.27560    | 7.32491    | 91.66485   | 2.67457   | Detected | Compromised | Detected    | Compromised |
| 358 | A_23_P128323  | SCNN1A      | Hs.591047 | sodium channel, nonvoltage-gated 1 alpha                                        | Homo sapiens sodium channel, nonvoltage-gated 1 alpha (SCNN1A), transcript variant 1, mRNA [NM_001038]                                        | 11.33340 | up | 3.34622  | up | 38.91761    | 3.55565    | 29.74988   | 7.83964   | Detected | Compromised | Detected    | Compromised |
| 359 | A_23_P382705  | TMTC2       | Hs.577775 | transmembrane and tetratricopeptide repeat containing 2                         | Homo sapiens transmembrane and tetratricopeptide repeat containing 2 (TMTC2), mRNA [NM_152588]                                                | 11.32137 | up | 23.86380 | up | 122.84638   | 11.23560   | 91.62411   | 3.38560   | Detected | Compromised | Detected    | Compromised |
| 360 | A_33_P3315814 | LOC728208   | Hs.647892 | hypothetical protein LOC728208                                                  | PREDICTED: Homo sapiens hypothetical protein LOC728208 (LOC728208), miscRNA [XR_040782]                                                       | 11.27692 | up | 5.47531  | up | 34.23108    | 3.14314    | 16.29635   | 2.62451   | Detected | Compromised | Detected    | Compromised |
| 361 | A_23_P88033   | FGF14       | Hs.508616 | fibroblast growth factor 14                                                     | Homo sapiens fibroblast growth factor 14 (FGF14), transcript variant 2, mRNA [NM_175923]                                                      | 11.27546 | up | 11.60610 | up | 39.68076    | 3.64400    | 39.58983   | 3.00790   | Detected | Compromised | Detected    | Compromised |
| 362 | A_33_P3413355 | CHST1       | Hs.104576 | carbohydrate (keratan sulfate Gal-6) sulfotransferase 1                         | Homo sapiens carbohydrate (keratan sulfate Gal-6) sulfotransferase 1 (CHST1), mRNA [NM_003654]                                                | 11.25781 | up | 12.21776 | up | 703.24930   | 64.68276   | 387.51987  | 27.96841  | Detected | Detected    | Detected    | Detected    |
| 363 | A_24_P120251  | TM4SF18     | Hs.22026  | transmembrane 4 L six family member 18                                          | Homo sapiens transmembrane 4 L six family member 18 (TM4SF18), mRNA [NM_138786]                                                               | 11.25759 | up | 10.90936 | up | 34.86007    | 3.20639    | 32.86276   | 2.65626   | Detected | Compromised | Detected    | Compromised |
| 364 | A_24_P923102  | KLHL23      | Hs.574626 | kelch-like 23 (Drosophila)                                                      | Kelch-like protein 23 [Source:UniProtKB/Swiss-Prot;Acc:Q8NBE8] [ENST00000392647]                                                              | 11.21242 | up | 11.64489 | up | 40.36454    | 3.72764    | 41.62518   | 3.15200   | Detected | Compromised | Detected    | Compromised |
| 365 | A_23_P142738  | TMEM178     | Hs.40808  | transmembrane protein 178                                                       | Homo sapiens transmembrane protein 178 (TMEM178), mRNA [NM_152390]                                                                            | 11.20162 | up | 6.64857  | up | 65.16959    | 6.02417    | 54.29431   | 7.20098   | Detected | Compromised | Detected    | Compromised |
| 366 | A_23_P216108  | ANK1        | Hs.654438 | ankyrin 1, erythrocytic                                                         | Homo sapiens ankyrin 1, erythrocytic (ANK1), transcript variant 3, mRNA [NM_000037]                                                           | 11.18899 | up | 8.89323  | up | 353.00410   | 32.66795   | 326.95584  | 32.41865  | Detected | Detected    | Detected    | Detected    |

|     |               |           |           |                                                                                |                                                                                                                                                                      |          |    |          |    |             |            |            |           |          |             |             |             |
|-----|---------------|-----------|-----------|--------------------------------------------------------------------------------|----------------------------------------------------------------------------------------------------------------------------------------------------------------------|----------|----|----------|----|-------------|------------|------------|-----------|----------|-------------|-------------|-------------|
| 367 | A_23_P35564   | SEC31B    | Hs.18889  | SEC31 homolog B (S. cerevisiae)                                                | Homo sapiens SEC31 homolog B (S. cerevisiae) (SEC31B), mRNA [NM_015490]                                                                                              | 11.16450 | up | 13.66384 | up | 1824.37930  | 169.20332  | 1382.33070 | 89.20821  | Detected | Detected    | Detected    | Detected    |
| 368 | A_33_P3405459 | C20orf195 | Hs.197755 | chromosome 20 open reading frame 195                                           | Homo sapiens chromosome 20 open reading frame 195 (C20orf195), mRNA [NM_024059]                                                                                      | 11.14529 | up | 11.50988 | up | 1157.32290  | 107.52171  | 954.09510  | 73.09479  | Detected | Detected    | Detected    | Detected    |
| 369 | A_23_P163492  | BAIAP3    | Hs.458427 | BAI1-associated protein 3                                                      | Homo sapiens BAI1-associated protein 3 (BAIAP3), mRNA [NM_003933]                                                                                                    | 11.08961 | up | 8.88073  | up | 41.67684    | 3.89145    | 33.76196   | 3.35231   | Detected | Compromised | Detected    | Compromised |
| 370 | A_33_P3355937 | LOC284276 | Hs.390287 | hypothetical LOC284276                                                         | Homo sapiens hypothetical LOC284276 (LOC284276), non-coding RNA [NR_015417]                                                                                          | 11.08263 | up | 3.02561  | up | 43.14889    | 4.03144    | 29.68110   | 8.65033   | Detected | Compromised | Detected    | Compromised |
| 371 | A_23_P29005   | SAMS1     | Hs.473341 | SAM domain, SH3 domain and nuclear localization signals 1                      | Homo sapiens SAM domain, SH3 domain and nuclear localization signals 1 (SAMS1), mRNA [NM_022136]                                                                     | 11.06859 | up | 8.56369  | up | 32.63537    | 3.05302    | 24.83676   | 2.55741   | Detected | Compromised | Detected    | Compromised |
| 372 | A_33_P3243887 | IL11      | Hs.467304 | interleukin 11                                                                 | Homo sapiens interleukin 11 (IL11), mRNA [NM_000641]                                                                                                                 | 11.04859 | up | 11.98718 | up | 12435.78600 | 1165.46530 | 8772.45800 | 645.31230 | Detected | Detected    | Detected    | Detected    |
| 373 | A_24_P658427  | NFIB      | Hs.644095 | nuclear factor I/B                                                             | Homo sapiens nuclear factor I/B (NFIB), mRNA [NM_005596]                                                                                                             | 11.03872 | up | 13.51909 | up | 3430.19040  | 321.76053  | 1965.67790 | 128.21251 | Detected | Detected    | Detected    | Detected    |
| 374 | A_23_P94840   | DYNLRB2   | Hs.98849  | dynein, light chain, roadblock-type 2                                          | Homo sapiens dynein, light chain, roadblock-type 2 (DYNLRB2), mRNA [NM_130897]                                                                                       | 11.00938 | up | 13.89792 | up | 253.64806   | 23.85622   | 220.48407  | 13.98920  | Detected | Detected    | Detected    | Detected    |
| 375 | A_33_P3318414 | HMH1      | Hs.465521 | histocompatibility (minor) HA-1                                                | Homo sapiens histocompatibility (minor) HA-1 (HMH1), mRNA [NM_012292]                                                                                                | 10.99954 | up | 10.76441 | up | 9852.38500  | 927.47000  | 7999.04700 | 655.25960 | Detected | Detected    | Detected    | Detected    |
| 376 | A_24_P365349  | CACNG7    |           | calcium channel, voltage-dependent, gamma subunit 7                            | Voltage-dependent calcium channel gamma-7 subunit (Neuronal voltage-gated calcium channel gamma-7 subunit) [Source:UniProtKB/Swiss-ProtAcc:P62955] [ENST00000391767] | 10.99320 | up | 12.71972 |    | 7325.11400  | 689.95930  | 6722.64060 | 466.04500 | Detected | Detected    | Detected    | Detected    |
| 377 | A_24_P943566  |           | Hs.436896 |                                                                                | Phosphatase and actin regulator 1 [Source:UniProtKB/Swiss-ProtAcc:Q9C0D0] [ENST00000379350]                                                                          | 10.96246 | up | 3.48536  | up | 51.18278    | 4.83447    | 14.03618   | 3.55113   | Detected | Compromised | Compromised | Compromised |
| 378 | A_33_P3316539 | SLC7A2    | Hs.448520 | solute carrier family 7 (cationic amino acid transporter, y+ system), member 2 | Homo sapiens solute carrier family 7 (cationic amino acid transporter, y+ system), member 2 (SLC7A2), transcript variant 2, mRNA [NM_001008539]                      | 10.95091 | up | 12.26519 |    | 2980.82370  | 281.85086  | 2685.27800 | 193.05470 | Detected | Detected    | Detected    | Detected    |
| 379 | A_23_P318904  | SERTAD4   | Hs.600545 | SERTA domain containing 4                                                      | Homo sapiens SERTA domain containing 4 (SERTAD4), mRNA [NM_019605]                                                                                                   | 10.94622 | up | 10.33855 | up | 405.99750   | 38.40541   | 228.23148  | 19.46622  | Detected | Detected    | Detected    | Detected    |
| 380 | A_33_P3395008 | ACOXL     | Hs.253320 | acyl-Coenzyme A oxidase-like                                                   | Homo sapiens acyl-Coenzyme A oxidase-like (ACOXL), transcript variant 1, mRNA [NM_001142807]                                                                         | 10.92841 | up | 13.28509 | up | 31.17739    | 2.95404    | 36.48599   | 2.42174   | Detected | Compromised | Detected    | Compromised |
| 381 | A_33_P3439713 | LOC283713 | Hs.4986   | hypothetical protein LOC283713                                                 | Homo sapiens cDNA FLJ37663 fis. clone BRHIP2011120 [AK094982]                                                                                                        | 10.92461 | up | 7.23527  |    | 74.07384    | 7.02089    | 50.07333   | 6.10264   | Detected | Compromised | Detected    | Compromised |
| 382 | A_23_P308136  | TRIM50    | Hs.647053 | tripartite motif-containing 50                                                 | Homo sapiens tripartite motif-containing 50 (TRIM50), mRNA [NM_178125]                                                                                               | 10.92353 | up | 9.18446  | up | 68.23266    | 6.46789    | 83.60413   | 8.02674   | Detected | Compromised | Detected    | Compromised |
| 383 | A_33_P3376546 | PTGFR     | Hs.654365 | prostaglandin F receptor (FP)                                                  | Homo sapiens prostaglandin F receptor (FP) (PTGFR), transcript variant 2, mRNA [NM_001039585]                                                                        | 10.88628 | up | 12.50082 | up | 1404.28850  | 133.57033  | 829.32960  | 58.49977  | Detected | Detected    | Detected    | Detected    |
| 384 | A_23_P48585   | SALL2     | Hs.719293 | sal-like 2 (Drosophila)                                                        | Homo sapiens sal-like 2 (Drosophila) (SALL2), mRNA [NM_005407]                                                                                                       | 10.84966 | up | 9.53120  | up | 1871.77400  | 178.63657  | 1140.57320 | 105.52149 | Detected | Detected    | Detected    | Detected    |
| 385 | A_23_P129458  | SDR42E1   | Hs.87779  | short chain dehydrogenase/reductase family 42E, member 1                       | Homo sapiens short chain dehydrogenase/reductase family 42E, member 1 (SDR42E1), mRNA [NM_145168]                                                                    | 10.76160 | up | 8.11631  | up | 32.71462    | 3.14774    | 24.53266   | 2.66533   | Detected | Compromised | Detected    | Compromised |
| 386 | A_33_P3394868 | LOC388588 |           | hypothetical protein LOC388588                                                 | Homo sapiens hypothetical protein LOC388588 (LOC388588), mRNA [NM_001163724]                                                                                         | 10.73694 | up | 14.61793 | up | 535.71540   | 51.66384   | 659.22360  | 39.76603  | Detected | Detected    | Detected    | Detected    |
| 387 | A_23_P259442  | CPE       | Hs.75360  | carboxypeptidase E                                                             | Homo sapiens carboxypeptidase E (CPE), mRNA [NM_001873]                                                                                                              | 10.73581 | up | 11.27468 | up | 11785.77700 | 1136.72770 | 8258.97200 | 645.93286 | Detected | Detected    | Detected    | Detected    |
| 388 | A_23_P357284  | GPR4      | Hs.171770 | G protein-coupled receptor 4                                                   | Homo sapiens G protein-coupled receptor 4 (GPR4), mRNA [NM_005282]                                                                                                   | 10.68811 | up | 9.76092  | up | 1731.05040  | 167.70346  | 1539.17870 | 139.04767 | Detected | Detected    | Detected    | Detected    |
| 389 | A_23_P252471  | PECAM1    | Hs.514412 | platelet/endothelial cell adhesion molecule                                    | Homo sapiens platelet/endothelial cell adhesion molecule (PECAM1), mRNA [NM_000442]                                                                                  | 10.68410 | up | 8.35486  | up | 357.17136   | 34.61559   | 346.58447  | 36.57932  | Detected | Detected    | Detected    | Detected    |
| 390 | A_33_P3340454 |           |           |                                                                                | UPF0594 protein C13orf38 [Source:UniProtKB/Swiss-ProtAcc:A6NNP5] [ENST00000340225]                                                                                   | 10.67764 | up | 3.22275  | up | 32.82027    | 3.18273    | 22.20318   | 6.07510   | Detected | Compromised | Detected    | Compromised |
| 391 | A_23_P37410   | CYP19A1   | Hs.260074 | cytochrome P450, family 19, subfamily A, polypeptide 1                         | Homo sapiens cytochrome P450, family 19, subfamily A, polypeptide 1 (CYP19A1), transcript variant 2, mRNA [NM_031226]                                                | 10.65677 | up | 11.98918 | up | 993.54330   | 96.53709   | 887.89000  | 65.30329  | Detected | Detected    | Detected    | Detected    |
| 392 | A_33_P3404257 | LOC729885 | Hs.685640 | similar to pheromone receptor                                                  | PREDICTED: Homo sapiens similar to pheromone receptor (LOC729885), miscRNA [XR_015687]                                                                               | 10.64205 | up | 9.07362  | up | 58.53431    | 5.69532    | 54.92576   | 5.33778   | Detected | Compromised | Detected    | Compromised |
| 393 | A_33_P3274462 |           |           |                                                                                |                                                                                                                                                                      | 10.63180 | up | 9.07326  | up | 30.56850    | 2.97715    | 25.20293   | 2.44936   | Detected | Compromised | Detected    | Compromised |
| 394 | A_23_P212508  | TF        | Hs.518267 | transferrin                                                                    | Homo sapiens transferrin (TF), mRNA [NM_001063]                                                                                                                      | 10.60173 | up | 5.01823  | up | 36.56189    | 3.57096    | 17.42358   | 3.06163   | Detected | Compromised | Detected    | Compromised |
| 395 | A_33_P3570193 | FLJ36000  | Hs.711145 | hypothetical FLJ36000                                                          | Homo sapiens hypothetical FLJ36000 (FLJ36000), non-coding RNA [NR_027084]                                                                                            | 10.58263 | up | 2.77897  | up | 32.86160    | 3.21535    | 26.17442   | 8.30537   | Detected | Compromised | Detected    | Compromised |
| 396 | A_33_P3330643 | KIF6      | Hs.588202 | kinesin family member 6                                                        | Homo sapiens kinesin family member 6 (KIF6), mRNA [NM_145027]                                                                                                        | 10.57832 | up | 13.32620 | up | 116.06253   | 11.36079   | 136.87100  | 9.05671   | Detected | Compromised | Detected    | Compromised |
| 397 | A_33_P3238295 | FAM66C    | Hs.512257 | family with sequence similarity 66, member C                                   | Homo sapiens family with sequence similarity 66, member C (FAM66C), non-coding RNA [NR_026788]                                                                       | 10.55419 | up | 12.25409 | up | 187.90637   | 18.43527   | 81.00075   | 5.82873   | Detected | Compromised | Detected    | Compromised |

|     |               |              |           |                                                                                                           |                                                                                                                                                   |          |    |          |    |             |            |             |            |          |             |          |             |
|-----|---------------|--------------|-----------|-----------------------------------------------------------------------------------------------------------|---------------------------------------------------------------------------------------------------------------------------------------------------|----------|----|----------|----|-------------|------------|-------------|------------|----------|-------------|----------|-------------|
| 398 | A_24_P37589   | ACPP         | Hs.433060 | acid phosphatase, prostate                                                                                | Homo sapiens acid phosphatase, prostate (ACPP), transcript variant 1, mRNA [NM_001089]                                                            | 10.54633 | up | 3.90621  | up | 32.75102    | 3.21556    | 23.29688    | 5.25906    | Detected | Compromised | Detected | Compromised |
| 399 | A_23_P107116  | RNF112       | Hs.189482 | ring finger protein 112                                                                                   | Homo sapiens ring finger protein 112 (RNF112), mRNA [NM_007148]                                                                                   | 10.52743 | up | 10.50394 | up | 3522.35550  | 346.45276  | 2656.85990  | 223.03967  | Detected | Detected    | Detected | Detected    |
| 400 | A_23_P94517   | DBC1         | Hs.532316 | deleted in bladder cancer 1                                                                               | Homo sapiens deleted in bladder cancer 1 (DBC1), mRNA [NM_014618]                                                                                 | 10.52361 | up | 12.38724 | up | 377.23993   | 37.11812   | 273.39642   | 19.46183   | Detected | Detected    | Detected | Detected    |
| 401 | A_23_P390148  | RALGPS1      | Hs.432842 | Ral GEF with PH domain and SH3 binding motif 1                                                            | Homo sapiens Ral GEF with PH domain and SH3 binding motif 1 (RALGPS1), mRNA [NM_014636]                                                           | 10.46444 | up | 10.57677 | up | 55.35303    | 5.47720    | 52.88453    | 4.40901    | Detected | Compromised | Detected | Compromised |
| 402 | A_33_P3423941 | IFITM1       | Hs.458414 | interferon induced transmembrane protein 1 (9-27)                                                         | Homo sapiens interferon induced transmembrane protein 1 (9-27) (IFITM1), mRNA [NM_003641]                                                         | 10.44985 | up | 10.46953 | up | 27394.09200 | 2714.43800 | 21991.41800 | 1852.21620 | Detected | Detected    | Detected | Detected    |
| 403 | A_23_P18447   | PPARGC1A     | Hs.527078 | peroxisome proliferator-activated receptor gamma, coactivator 1 alpha                                     | Homo sapiens peroxisome proliferator-activated receptor gamma, coactivator 1 alpha (PPARGC1A), mRNA [NM_013261]                                   | 10.44337 | up | 6.39084  | up | 136.79720   | 13.56344   | 92.20863    | 12.72272   | Detected | Compromised | Detected | Compromised |
| 404 | A_33_P3389704 | CES1         | Hs.558865 | carboxylesterase 1 (monocyte/macrophage serine esterase 1)                                                | Homo sapiens carboxylesterase 1 (monocyte/macrophage serine esterase 1) (CES1), transcript variant 3, mRNA [NM_001266]                            | 10.42760 | up | 8.89456  | up | 668.23180   | 66.35536   | 647.87980   | 64.22967   | Detected | Detected    | Detected | Detected    |
| 405 | A_23_P129133  | OCA2         | Hs.654411 | oculocutaneous albinism II                                                                                | Homo sapiens oculocutaneous albinism II (OCA2), mRNA [NM_000275]                                                                                  | 10.40769 | up | 21.44476 | up | 136.87029   | 13.61720   | 102.98220   | 4.23454    | Detected | Compromised | Detected | Compromised |
| 406 | A_33_P3331916 |              |           |                                                                                                           |                                                                                                                                                   | 10.40136 | up | 11.45069 | up | 537.71387   | 53.52961   | 421.38748   | 32.45006   | Detected | Detected    | Detected | Detected    |
| 407 | A_23_P402936  | PPFIA2       | Hs.506216 | protein tyrosine phosphatase, receptor type, F polypeptide (PTPRF), interacting protein (liprin), alpha 2 | Homo sapiens protein tyrosine phosphatase, receptor type, F polypeptide (PTPRF), interacting protein (liprin), alpha 2 (PPFIA2), mRNA [NM_003625] | 10.37351 | up | 17.30042 | up | 70.73332    | 7.06043    | 71.99606    | 3.66959    | Detected | Compromised | Detected | Compromised |
| 408 | A_23_P257803  | DMGDH        | Hs.655653 | dimethylglycine dehydrogenase                                                                             | Homo sapiens dimethylglycine dehydrogenase (DMGDH), nuclear gene encoding mitochondrial protein, mRNA [NM_013391]                                 | 10.29127 | up | 4.15070  | up | 44.86228    | 4.51383    | 41.58643    | 8.83477    | Detected | Compromised | Detected | Compromised |
| 409 | A_33_P3353030 | UCN          | Hs.534363 | urocortin                                                                                                 | Homo sapiens urocortin (UCN), mRNA [NM_003353]                                                                                                    | 10.27478 | up | 10.04579 | up | 2347.14840  | 236.53807  | 2149.90190  | 188.71219  | Detected | Detected    | Detected | Detected    |
| 410 | A_23_P109269  | LAMA5        | Hs.473256 | laminin, alpha 5                                                                                          | Homo sapiens laminin, alpha 5 (LAMA5), mRNA [NM_005560]                                                                                           | 10.27451 | up | 9.93541  | up | 701.03300   | 70.64972   | 769.16620   | 68.26530   | Detected | Detected    | Detected | Detected    |
| 411 | A_24_P215653  | CLEC14A      | Hs.525307 | C-type lectin domain family 14, member A                                                                  | Homo sapiens C-type lectin domain family 14, member A (CLEC14A), mRNA [NM_175060]                                                                 | 10.23899 | up | 8.24649  | up | 94.50938    | 9.55765    | 110.31227   | 11.79560   | Detected | Compromised | Detected | Compromised |
| 412 | A_23_P73609   | NDP          | Hs.522615 | Norrie disease (pseudoglioma)                                                                             | Homo sapiens Norrie disease (pseudoglioma) (NDP), mRNA [NM_000286]                                                                                | 10.22683 | up | 9.88189  | up | 209.89755   | 21.25198   | 189.68622   | 16.92628   | Detected | Detected    | Detected | Detected    |
| 413 | A_23_P86470   | CH25H        | Hs.47357  | cholesterol 25-hydroxylase                                                                                | Homo sapiens cholesterol 25-hydroxylase (CH25H), mRNA [NM_003956]                                                                                 | 10.21213 | up | 9.81912  | up | 1060.55300  | 107.53478  | 877.67505   | 78.81826   | Detected | Detected    | Detected | Detected    |
| 414 | A_23_P161135  | LEPR         | Hs.23581  | leptin receptor                                                                                           | Homo sapiens leptin receptor (LEPR), transcript variant 1, mRNA [NM_002303]                                                                       | 10.16809 | up | 8.95892  | up | 36.10723    | 3.67695    | 31.60733    | 3.11098    | Detected | Compromised | Detected | Compromised |
| 415 | A_24_P59667   | JAK3         | Hs.515247 | Janus kinase 3                                                                                            | Homo sapiens Janus kinase 3 (JAK3), mRNA [NM_000215]                                                                                              | 10.15420 | up | 8.77331  | up | 5083.65430  | 518.39813  | 4698.01760  | 492.29178  | Detected | Detected    | Detected | Detected    |
| 416 | A_33_P3210203 | SPIRE2       | Hs.461786 | spire homolog 2 (Drosophila)                                                                              | Homo sapiens spire homolog 2 (Drosophila) (SPIRE2), mRNA [NM_032451]                                                                              | 10.13470 | up | 9.27045  | up | 1052.75790  | 107.55999  | 1078.50610  | 102.55882  | Detected | Detected    | Detected | Detected    |
| 417 | A_33_P3356361 | LOC100131089 | Hs.386000 | hypothetical protein LOC100131089                                                                         | Homo sapiens cDNA FLJ45796 fis, clone NT2R12012542, [AK127696]                                                                                    | 10.08544 | up | 5.02432  | up | 113.84589   | 11.68842   | 108.81562   | 19.09762   | Detected | Compromised | Detected | Detected    |
| 418 | A_33_P3718269 | LOC285628    | Hs.604728 | hypothetical protein LOC285628                                                                            | Homo sapiens mRNA full length insert cDNA clone EUROIMAGE 2005635 [AL389942]                                                                      | 10.07387 | up | 12.36708 | up | 615.74430   | 63.29032   | 393.57580   | 28.06252   | Detected | Detected    | Detected | Detected    |
| 419 | A_33_P3235677 |              |           |                                                                                                           |                                                                                                                                                   | 10.07307 | up | 8.23990  | up | 36.93503    | 3.79673    | 31.93821    | 3.41786    | Detected | Compromised | Detected | Compromised |
| 420 | A_33_P3271001 | NIPSNAP3B    | Hs.720820 | nipsnap homolog 3B (C. elegans)                                                                           | Homo sapiens nipsnap homolog 3B (C. elegans) (NIPSNAP3B), mRNA [NM_018376]                                                                        | 10.05388 | up | 6.49294  | up | 31.68244    | 3.26301    | 33.86998    | 4.59980    | Detected | Compromised | Detected | Compromised |
| 421 | A_23_P202520  | ABLIM1       | Hs.438236 | actin binding LIM protein 1                                                                               | Homo sapiens actin binding LIM protein 1 (ABLIM1), transcript variant 3, mRNA [NM_001003408]                                                      | 10.00016 | up | 10.19339 | up | 2657.81200  | 275.20130  | 1933.52270  | 167.26155  | Detected | Detected    | Detected | Detected    |
| 422 | A_23_P151059  | FAM90A1      | Hs.196086 | family with sequence similarity 90, member A1                                                             | Homo sapiens family with sequence similarity 90, member A1 (FAM90A1), mRNA [NM_018088]                                                            | 9.98958  | up | 10.89579 | up | 269.46597   | 27.93120   | 302.20680   | 24.45744   | Detected | Detected    | Detected | Detected    |
| 423 | A_24_P6674    | WDR31        | Hs.133331 | WD repeat domain 31                                                                                       | Homo sapiens WD repeat domain 31 (WDR31), transcript variant 1, mRNA [NM_001012361]                                                               | 9.93943  | up | 4.45878  | up | 29.11773    | 3.03340    | 12.67022    | 2.50573    | Detected | Compromised | Detected | Compromised |
| 424 | A_24_P243749  | PKD4         | Hs.8364   | pyruvate dehydrogenase kinase, isozyme 4                                                                  | Homo sapiens pyruvate dehydrogenase kinase, isozyme 4 (PKD4), mRNA [NM_002612]                                                                    | 9.93847  | up | 38.06233 | up | 1036.09610  | 107.94779  | 867.62580   | 20.10030   | Detected | Detected    | Detected | Detected    |
| 425 | A_24_P75917   | CCDC144B     | Hs.721149 | coiled-coil domain containing 144B                                                                        | Homo sapiens coiled-coil domain containing 144B (CCDC144B), mRNA [NM_182568]                                                                      | 9.93555  | up | 7.56204  | up | 39.48937    | 4.11549    | 32.32752    | 3.76963    | Detected | Compromised | Detected | Compromised |
| 426 | A_23_P72737   | IFITM1       | Hs.458414 | interferon induced transmembrane protein 1 (9-27)                                                         | Homo sapiens interferon induced transmembrane protein 1 (9-27) (IFITM1), mRNA [NM_003641]                                                         | 9.93314  | up | 9.08901  | up | 52089.05500 | 5429.91700 | 54394.91000 | 5271.44630 | Detected | Detected    | Detected | Detected    |
| 427 | A_24_P288915  |              | Hs.649499 |                                                                                                           | Coiled-coil domain-containing protein 144A [Source:UniProtKB/Swiss-Prot;Acc:Q2RUR9] [ENST00000340621]                                             | 9.92664  | up | 8.90566  | up | 66.31436    | 6.91733    | 58.88777    | 5.83075    | Detected | Compromised | Detected | Compromised |
| 428 | A_23_P217845  | RGS16        | Hs.413297 | regulator of G-protein signaling 16                                                                       | Homo sapiens regulator of G-protein signaling 16 (RGS16), mRNA [NM_002928]                                                                        | 9.90416  | up | 10.85331 | up | 273.88140   | 28.61284   | 325.16925   | 26.41878   | Detected | Detected    | Detected | Detected    |
| 429 | A_23_P205900  | NTRK3        | Hs.410969 | neurotrophic tyrosine kinase, receptor, type 3                                                            | Homo sapiens neurotrophic tyrosine kinase, receptor, type 3 (NTRK3), transcript variant 1, mRNA [NM_001012336]                                    | 9.88527  | up | 2.92004  | up | 58.84325    | 6.16370    | 57.21378    | 17.27734   | Detected | Compromised | Detected | Detected    |

|     |               |           |           |                                                                                                     |                                                                                                                                           |         |    |          |    |             |            |             |            |          |             |             |             |
|-----|---------------|-----------|-----------|-----------------------------------------------------------------------------------------------------|-------------------------------------------------------------------------------------------------------------------------------------------|---------|----|----------|----|-------------|------------|-------------|------------|----------|-------------|-------------|-------------|
| 430 | A_24_P203298  | IQUB      | Hs.159650 | IQ motif and ubiquitin domain containing                                                            | Homo sapiens IQ motif and ubiquitin domain containing (IQUB), mRNA [NM_178827]                                                            | 9.87373 | up | 4.50717  | up | 32.16048    | 3.37267    | 26.01299    | 5.08923    | Detected | Compromised | Detected    | Compromised |
| 431 | A_33_P3347869 | C3        | Hs.529053 | complement component 3                                                                              | Homo sapiens complement component 3 (C3), mRNA [NM_000064]                                                                                | 9.85969 | up | 7.86171  | up | 1440.64990  | 151.29625  | 1072.49220  | 120.29360  | Detected | Detected    | Detected    | Detected    |
| 432 | A_33_P3241269 | CES1      | Hs.558865 | carboxylesterase 1 (monocyte/macrophage serine esterase 1)                                          | Homo sapiens carboxylesterase 1 (monocyte/macrophage serine esterase 1) (CES1), transcript variant 1, mRNA [NM_001025195]                 | 9.82588 | up | 9.32342  | up | 50269.65600 | 5297.46040 | 33968.60000 | 3212.68500 | Detected | Detected    | Detected    | Detected    |
| 433 | A_33_P3276718 | HGF       | Hs.396530 | hepatocyte growth factor (hepapoietin A; scatter factor)                                            | Homo sapiens hepatocyte growth factor (hepapoietin A; scatter factor) (HGF), transcript variant 5, mRNA [NM_001010934]                    | 9.81608 | up | 10.21739 | up | 361.13947   | 38.09519   | 304.65887   | 26.29294   | Detected | Detected    | Detected    | Detected    |
| 434 | A_33_P3338733 | MITF      | Hs.166017 | microphthalmia-associated transcription factor                                                      | Homo sapiens microphthalmia-associated transcription factor (MITF), transcript variant 1, mRNA [NM_198159]                                | 9.81411 | up | 10.79317 | up | 3599.23500  | 379.74540  | 2816.83230  | 230.13230  | Detected | Detected    | Detected    | Detected    |
| 435 | A_24_P31627   | KCNB1     | Hs.84244  | potassium voltage-gated channel, Shab-related subfamily, member 1                                   | Homo sapiens potassium voltage-gated channel, Shab-related subfamily, member 1 (KCNB1), mRNA [NM_004975]                                  | 9.81067 | up | 1.13675  | up | 30.20052    | 3.18749    | 3.46456     | 2.68750    | Detected | Compromised | Compromised | Compromised |
| 436 | A_24_P388528  | ST6GAL1   | Hs.207459 | ST6 beta-galactosamide alpha-2,6-sialyltransferase 1                                                | Homo sapiens ST6 beta-galactosamide alpha-2,6-sialyltransferase 1 (ST6GAL1), transcript variant 1, mRNA [NM_173216]                       | 9.80316 | up | 7.35401  | up | 30.55300    | 3.22716    | 22.69565    | 2.72135    | Detected | Compromised | Detected    | Compromised |
| 437 | A_23_P363647  | DDX26B    | Hs.496829 | DEAD/H (Asp-Glu-Ala-Asp/His) box polypeptide 26B                                                    | Homo sapiens DEAD/H (Asp-Glu-Ala-Asp/His) box polypeptide 26B (DDX26B), mRNA [NM_182540]                                                  | 9.80048 | up | 7.39646  | up | 335.12012   | 35.40678   | 230.75648   | 27.51032   | Detected | Detected    | Detected    | Detected    |
| 438 | A_24_P49260   | SPTLC3    | Hs.425023 | serine palmitoyltransferase, long chain base subunit 3                                              | Homo sapiens serine palmitoyltransferase, long chain base subunit 3 (SPTLC3), mRNA [NM_018327]                                            | 9.79065 | up | 10.62372 | up | 54.48208    | 5.76203    | 31.29885    | 2.59787    | Detected | Compromised | Detected    | Compromised |
| 439 | A_23_P66881   | RGS9      | Hs.664380 | regulator of G-protein signaling 9                                                                  | Homo sapiens regulator of G-protein signaling 9 (RGS9), transcript variant 1, mRNA [NM_003635]                                            | 9.78291 | up | 15.03692 | up | 273.88373   | 28.98886   | 265.73007   | 15.58286   | Detected | Detected    | Detected    | Detected    |
| 440 | A_23_P218002  | PRG2      | Hs.512633 | proteoglycan 2, bone marrow (natural killer cell activator, eosinophil granule major basic protein) | Homo sapiens proteoglycan 2, bone marrow (natural killer cell activator, eosinophil granule major basic protein) (PRG2), mRNA [NM_002728] | 9.76122 | up | 10.91528 | up | 1356.21910  | 143.86629  | 1262.40490  | 101.98341  | Detected | Detected    | Detected    | Detected    |
| 441 | A_23_P110777  | LECT2     | Hs.512580 | leukocyte cell-derived chemotaxin 2                                                                 | Homo sapiens leukocyte cell-derived chemotaxin 2 (LECT2), mRNA [NM_002302]                                                                | 9.72469 | up | 4.65029  | up | 94.45591    | 10.05742   | 74.50124    | 14.12698   | Detected | Compromised | Detected    | Detected    |
| 442 | A_23_P417383  | ASPRV1    | Hs.516253 | aspartic peptidase, retroviral-like 1                                                               | Homo sapiens aspartic peptidase, retroviral-like 1 (ASPRV1), mRNA [NM_152792]                                                             | 9.71514 | up | 9.53292  | up | 4057.33230  | 432.43860  | 2917.69500  | 269.88544  | Detected | Detected    | Detected    | Detected    |
| 443 | A_24_P109838  | SLC6A15   | Hs.44424  | solute carrier family 6 (neutral amino acid transporter), member 15                                 | Homo sapiens solute carrier family 6 (neutral amino acid transporter), member 15 (SLC6A15), transcript variant 1, mRNA [NM_182767]        | 9.71492 | up | 9.57774  | up | 274.79120   | 29.28846   | 250.89487   | 23.09905   | Detected | Detected    | Detected    | Detected    |
| 444 | A_33_P3417695 | ODF3B     | Hs.531314 | outer dense fiber of sperm tails 3B                                                                 | Homo sapiens outer dense fiber of sperm tails 3B (ODF3B), mRNA [NM_001014440]                                                             | 9.68329 | up | 9.60861  | up | 1713.26860  | 183.20420  | 2160.94970  | 198.31232  | Detected | Detected    | Detected    | Detected    |
| 445 | A_24_P940006  | EFNB3     | Hs.26988  | ephrin-B3                                                                                           | Homo sapiens ephrin-B3 (EFNB3), mRNA [NM_001406]                                                                                          | 9.65353 | up | 9.14287  | up | 956.46820   | 102.59290  | 745.17000   | 71.86846   | Detected | Detected    | Detected    | Detected    |
| 446 | A_33_P3330952 | ATP8A1    | Hs.435052 | ATPase, aminophospholipid transporter (APLT), class I, type 8A, member 1                            | Homo sapiens ATPase, aminophospholipid transporter (APLT), class I, type 8A, member 1 (ATP8A1), transcript variant 1, mRNA [NM_006095]    | 9.63941 | up | 18.34085 | up | 244.64282   | 26.27939   | 185.91254   | 8.93830    | Detected | Detected    | Detected    | Compromised |
| 447 | A_23_P381746  | ASXL3     | Hs.464876 | additional sex combs like 3 (Drosophila)                                                            | Homo sapiens additional sex combs like 3 (Drosophila) (ASXL3), mRNA [NM_030632]                                                           | 9.61154 | up | 4.67885  | up | 33.91995    | 3.65423    | 18.61565    | 3.50837    | Detected | Compromised | Detected    | Compromised |
| 448 | A_23_P156708  | TNXB      | Hs.485104 | tenascin XB                                                                                         | Homo sapiens tenascin XB (TNXB), transcript variant XB-S, mRNA [NM_032470]                                                                | 9.59115 | up | 9.58199  | up | 5805.15700  | 626.72424  | 5762.05130  | 530.25757  | Detected | Detected    | Detected    | Detected    |
| 449 | A_33_P3432135 | LOC285965 | Hs.642649 | hypothetical protein LOC285965                                                                      | Homo sapiens mRNA; cDNA DKFZs686O0650 (from clone DKFZs686O0650) [AL383583]                                                               | 9.56009 | up | 1.84964  | up | 27.38919    | 2.96654    | 5.14404     | 2.45236    | Detected | Compromised | Compromised | Compromised |
| 450 | A_33_P3390580 | CCDC144A  | Hs.721149 | coiled-coil domain containing 144A                                                                  | Homo sapiens coiled-coil domain containing 144A (CCDC144A), mRNA [NM_014695]                                                              | 9.53925 | up | 8.10330  | up | 88.15624    | 9.56912    | 58.62548    | 6.37955    | Detected | Compromised | Detected    | Compromised |
| 451 | A_23_P34045   | EDA       | Hs.105407 | ectodysplasin A                                                                                     | Homo sapiens ectodysplasin A (EDA), transcript variant 1, mRNA [NM_001399]                                                                | 9.53450 | up | 12.73433 | up | 188.46124   | 20.46714   | 147.10527   | 10.18633   | Detected | Detected    | Detected    | Compromised |
| 452 | A_33_P3389113 |           |           |                                                                                                     |                                                                                                                                           | 9.49794 | up | 7.54023  | up | 175.47730   | 19.13042   | 136.40890   | 15.95232   | Detected | Detected    | Detected    | Detected    |
| 453 | A_33_P3351371 | CYP19A1   | Hs.260074 | cytochrome P450, family 19, subfamily A, polypeptide 1                                              | Homo sapiens cytochrome P450, family 19, subfamily A, polypeptide 1 (CYP19A1), transcript variant 2, mRNA [NM_031226]                     | 9.49635 | up | 9.30440  | up | 801.56730   | 87.40097   | 997.23000   | 94.50887   | Detected | Detected    | Detected    | Detected    |
| 454 | A_24_P759674  | OBFC1     | Hs.62314  | oligonucleotide/oligosaccharide-binding fold containing 1                                           | Homo sapiens oligonucleotide/oligosaccharide-binding fold containing 1 (OBFC1), mRNA [NM_024928]                                          | 9.49633 | up | 9.66432  | up | 1293.16530  | 141.00398  | 787.50500   | 71.85342   | Detected | Detected    | Detected    | Detected    |
| 455 | A_24_P290751  | DTX1      | Hs.372152 | deltex homolog 1 (Drosophila)                                                                       | Homo sapiens deltex homolog 1 (Drosophila) (DTX1), mRNA [NM_004416]                                                                       | 9.49618 | up | 11.88122 | up | 28.64580    | 3.12353    | 35.12608    | 2.60696    | Detected | Compromised | Detected    | Compromised |
| 456 | A_33_P3222762 | HULC      |           | highly up-regulated in liver cancer (non-protein coding)                                            | Homo sapiens highly up-regulated in liver cancer (non-protein coding) (HULC), non-coding RNA [NR_004855]                                  | 9.47423 | up | 6.03604  | up | 37.15744    | 4.06102    | 23.54878    | 3.44019    | Detected | Compromised | Detected    | Compromised |
| 457 | A_23_P46025   | ETNK2     | Hs.497469 | ethanolamine kinase 2                                                                               | Homo sapiens ethanolamine kinase 2 (ETNK2), mRNA [NM_018208]                                                                              | 9.38866 | up | 8.26364  | up | 236.97293   | 26.13535   | 141.08897   | 15.05522   | Detected | Detected    | Detected    | Compromised |

|     |               |          |           |                                                          |                                                                                                                   |         |    |          |    |             |            |             |            |          |             |          |             |
|-----|---------------|----------|-----------|----------------------------------------------------------|-------------------------------------------------------------------------------------------------------------------|---------|----|----------|----|-------------|------------|-------------|------------|----------|-------------|----------|-------------|
| 458 | A_24_P148796  | MST1     | Hs.512587 | macrophage stimulating 1 (hepatocyte growth factor-like) | Homo sapiens macrophage stimulating 1 (hepatocyte growth factor-like) (MST1), mRNA [NM_020998]                    | 9.36618 | up | 13.31739 | up | 4319.08060  | 477.48734  | 4542.70170  | 300.78818  | Detected | Detected    | Detected | Detected    |
| 459 | A_23_P324813  | BCL6B    | Hs.22575  | B-cell CLL/lymphoma 6, member B (zinc finger protein)    | Homo sapiens B-cell CLL/lymphoma 6, member B (zinc finger protein) (BCL6B), mRNA [NM_181844]                      | 9.35002 | up | 14.89408 | up | 98.39480    | 10.89664   | 70.21331    | 4.15692    | Detected | Compromised | Detected | Compromised |
| 460 | A_33_P3351554 | ETNK2    | Hs.497469 | ethanolamine kinase 2                                    | Homo sapiens ethanolamine kinase 2 (ETNK2), mRNA [NM_018208]                                                      | 9.33878 | up | 9.56199  | up | 5174.66850  | 573.75400  | 3572.62960  | 329.46190  | Detected | Detected    | Detected | Detected    |
| 461 | A_33_P3284838 |          | Hs.132442 |                                                          | Putative uncharacterized protein C10orf115 [Source:UniProtKB/Swiss-Prot;Acc:Q5Q7P4] [ENST00000399806]             | 9.33818 | up | 2.88170  | up | 30.72678    | 3.40712    | 32.55511    | 9.96175    | Detected | Compromised | Detected | Compromised |
| 462 | A_33_P3257182 | MYBPC2   | Hs.85937  | myosin binding protein C, fast type                      | Homo sapiens myosin binding protein C, fast type (MYBPC2), mRNA [NM_004533]                                       | 9.32309 | up | 9.88208  | up | 28.88374    | 3.20794    | 33.51798    | 2.99085    | Detected | Compromised | Detected | Compromised |
| 463 | A_33_P3364348 | JPH1     | Hs.657367 | junctionophilin 1                                        | Homo sapiens junctionophilin 1 (JPH1), mRNA [NM_020647]                                                           | 9.28563 | up | 6.64898  | up | 131.98358   | 14.71776   | 77.05670    | 10.21930   | Detected | Compromised | Detected | Compromised |
| 464 | A_23_P146294  | EFCAB1   | Hs.23245  | EF-hand calcium binding domain 1                         | Homo sapiens EF-hand calcium binding domain 1 (EFCAB1), transcript variant 1, mRNA [NM_024553]                    | 9.25280 | up | 7.26284  | up | 411.62897   | 46.06443   | 346.81710   | 42.10753   | Detected | Detected    | Detected | Detected    |
| 465 | A_23_P116898  | A2M      | Hs.212838 | alpha-2-macroglobulin                                    | Homo sapiens alpha-2-macroglobulin (A2M), mRNA [NM_000014]                                                        | 9.24928 | up | 8.84767  | up | 8472.32900  | 948.47900  | 5920.55600  | 590.06384  | Detected | Detected    | Detected | Detected    |
| 466 | A_23_P167030  | PTH1R    | Hs.1019   | parathyroid hormone 1 receptor                           | Homo sapiens parathyroid hormone 1 receptor (PTH1R), mRNA [NM_000316]                                             | 9.23811 | up | 9.86247  | up | 142.52359   | 15.97485   | 170.30977   | 15.22718   | Detected | Compromised | Detected | Detected    |
| 467 | A_24_P928969  | PTPN3    | Hs.436429 | protein tyrosine phosphatase, non-receptor type 3        | Homo sapiens protein tyrosine phosphatase, non-receptor type 3 (PTPN3), transcript variant 3, mRNA [NM_001145389] | 9.20607 | up | 9.84601  | up | 852.26874   | 95.85953   | 493.61120   | 44.20694   | Detected | Detected    | Detected | Detected    |
| 468 | A_23_P125423  | C1R      | Hs.524224 | complement component 1, r subcomponent                   | Homo sapiens complement component 1, r subcomponent (C1R), mRNA [NM_001733]                                       | 9.20476 | up | 7.41375  | up | 29453.14600 | 3313.23780 | 26236.24400 | 3120.53830 | Detected | Detected    | Detected | Detected    |
| 469 | A_23_P125748  | ZMAT1    | Hs.496512 | zinc finger, matrix type 1                               | Homo sapiens zinc finger, matrix type 1 (ZMAT1), transcript variant 3, mRNA [NM_032441]                           | 9.16610 | up | 6.67031  | up | 88.71359    | 10.02164   | 49.78720    | 6.58169    | Detected | Compromised | Detected | Compromised |
| 470 | A_33_P3275878 | SFTPB    | Hs.512690 | surfactant protein B                                     | Homo sapiens surfactant protein B (SFTPB), transcript variant 1, mRNA [NM_000542]                                 | 9.15881 | up | 5.14571  | up | 28.34736    | 3.20484    | 15.73904    | 2.69711    | Detected | Compromised | Detected | Compromised |
| 471 | A_33_P3242543 | MAOA     | Hs.183109 | monoamine oxidase A                                      | Homo sapiens monoamine oxidase A (MAOA), nuclear gene encoding mitochondrial protein, mRNA [NM_002940]            | 9.13875 | up | 9.21871  | up | 8552.10600  | 968.99040  | 5194.00730  | 496.81860  | Detected | Detected    | Detected | Detected    |
| 472 | A_23_P25155   | GPR84    | Hs.306199 | G protein-coupled receptor 84                            | Homo sapiens G protein-coupled receptor 84 (GPR84), mRNA [NM_020370]                                              | 9.12849 | up | 5.23166  | up | 114.77057   | 13.01862   | 92.71485    | 15.62699   | Detected | Compromised | Detected | Detected    |
| 473 | A_23_P202071  | CUGBP2   | Hs.309288 | CUG triplet repeat, RNA binding protein 2                | Homo sapiens CUG triplet repeat, RNA binding protein 2 (CUGBP2), transcript variant 3, mRNA [NM_001025077]        | 9.12815 | up | 9.15363  | up | 11394.29200 | 1292.52170 | 7654.13800  | 737.34140  | Detected | Detected    | Detected | Detected    |
| 474 | A_23_P115645  | CUGBP2   | Hs.309288 | CUG triplet repeat, RNA binding protein 2                | Homo sapiens CUG triplet repeat, RNA binding protein 2 (CUGBP2), transcript variant 1, mRNA [NM_001025076]        | 9.12721 | up | 9.31670  | up | 775.10376   | 87.93366   | 587.70910   | 55.62444   | Detected | Detected    | Detected | Detected    |
| 475 | A_33_P3420816 | GDF1     | Hs.412355 | growth differentiation factor 1                          | Homo sapiens growth differentiation factor 1 (GDF1), mRNA [NM_001492]                                             | 9.10775 | up | 9.12628  | up | 494.57013   | 56.22764   | 519.62946   | 50.20715   | Detected | Detected    | Detected | Detected    |
| 476 | A_23_P134419  | ZP3      | Hs.656137 | zona pellucida glycoprotein 3 (sperm receptor)           | Homo sapiens zona pellucida glycoprotein 3 (sperm receptor) (ZP3), transcript variant 2, mRNA [NM_007155]         | 9.05221 | up | 6.48660  | up | 133.51172   | 15.27206   | 137.33998   | 18.67003   | Detected | Detected    | Detected | Detected    |
| 477 | A_23_P215744  | CTTNBP2  | Hs.592285 | cortactin binding protein 2                              | Homo sapiens cortactin binding protein 2 (CTTNBP2), mRNA [NM_033427]                                              | 9.03376 | up | 10.72283 | up | 167.83832   | 19.23782   | 116.03054   | 9.54176    | Detected | Compromised | Detected | Compromised |
| 478 | A_23_P343398  | CCR7     | Hs.370036 | chemokine (C-C motif) receptor 7                         | Homo sapiens chemokine (C-C motif) receptor 7 (CCR7), mRNA [NM_001838]                                            | 9.03262 | up | 9.44478  | up | 497.52982   | 57.03458   | 424.99814   | 39.67899   | Detected | Detected    | Detected | Detected    |
| 479 | A_33_P3237927 | ARHGAP4  | Hs.701324 | Rho GTPase activating protein 4                          | Homo sapiens Rho GTPase activating protein 4 (ARHGAP4), transcript variant 1, mRNA [NM_001164741]                 | 9.03262 | up | 9.45522  | up | 904.85440   | 103.72851  | 805.22860   | 75.09538   | Detected | Detected    | Detected | Detected    |
| 480 | A_23_P256047  | ANKRD5   | Hs.70903  | ankyrin repeat domain 5                                  | Homo sapiens ankyrin repeat domain 5 (ANKRD5), transcript variant 1, mRNA [NM_022096]                             | 9.02772 | up | 4.14157  | up | 28.74980    | 3.29754    | 25.42098    | 5.41243    | Detected | Compromised | Detected | Compromised |
| 481 | A_24_P295590  | RASSF4   | Hs.522895 | Ras association (RalGDS/AF-6) domain family member 4     | Homo sapiens Ras association (RalGDS/AF-6) domain family member 4 (RASSF4), mRNA [NM_032023]                      | 8.99940 | up | 8.89714  | up | 1131.59290  | 130.19958  | 948.09263   | 93.96493   | Detected | Detected    | Detected | Detected    |
| 482 | A_24_P2117572 | EDNRA    | Hs.183713 | endothelin receptor type A                               | Homo sapiens endothelin receptor type A (EDNRA), transcript variant 1, mRNA [NM_001957]                           | 8.99458 | up | 9.41405  | up | 7132.73440  | 821.12360  | 5827.34900  | 545.83330  | Detected | Detected    | Detected | Detected    |
| 483 | A_33_P3334220 | ACACB    | Hs.234898 | acetyl-Coenzyme A carboxylase beta                       | Homo sapiens acetyl-Coenzyme A carboxylase beta (ACACB), mRNA [NM_001093]                                         | 8.98756 | up | 8.44658  | up | 564.99210   | 65.09295   | 436.61673   | 45.58112   | Detected | Detected    | Detected | Detected    |
| 484 | A_32_P420520  | FLJ39582 | Hs.517430 | hypothetical LOC439931                                   | Homo sapiens hypothetical LOC439931 (FLJ39582), transcript variant 1, non-coding RNA [NR_027051]                  | 8.98557 | up | 7.27263  | up | 79.71062    | 9.18552    | 78.34224    | 9.49883    | Detected | Compromised | Detected | Compromised |
| 485 | A_33_P3219279 | JPH4     | Hs.597841 | junctionophilin 4                                        | Homo sapiens junctionophilin 4 (JPH4), transcript variant 1, mRNA [NM_032452]                                     | 8.97272 | up | 2.17488  | up | 28.55239    | 3.29497    | 32.48565    | 13.17107   | Detected | Compromised | Detected | Compromised |
| 486 | A_23_P144020  | CNTN4    | Hs.298705 | contactin 4                                              | Homo sapiens contactin 4 (CNTN4), transcript variant 3, mRNA [NM_175613]                                          | 8.96547 | up | 4.61144  | up | 32.27991    | 3.72814    | 22.81206    | 4.36207    | Detected | Compromised | Detected | Compromised |
| 487 | A_24_P97825   | CCDC69   | Hs.655336 | coiled-coil domain containing 69                         | Homo sapiens coiled-coil domain containing 69 (CCDC69), mRNA [NM_015621]                                          | 8.94441 | up | 14.16009 | up | 296.36618   | 34.30915   | 189.38914   | 11.79382   | Detected | Detected    | Detected | Compromised |



|     |               |           |           |                                                                         |                                                                                                                                |         |    |          |    |             |             |             |             |          |             |             |             |
|-----|---------------|-----------|-----------|-------------------------------------------------------------------------|--------------------------------------------------------------------------------------------------------------------------------|---------|----|----------|----|-------------|-------------|-------------|-------------|----------|-------------|-------------|-------------|
| 488 | A_24_P260101  | MME       | Hs.307734 | membrane metallo-endopeptidase                                          | Homo sapiens membrane metallo-endopeptidase (MME), transcript variant 2b, mRNA [NM_007289]                                     | 8.92754 | up | 8.87739  | up | 18017.11300 | 2089.71140  | 14984.50100 | 1488.40930  | Detected | Detected    | Detected    | Detected    |
| 489 | A_33_P3391915 | BTBD17    | Hs.211870 | BTB (POZ) domain containing 17                                          | Homo sapiens BTB (POZ) domain containing 17 (BTBD17), mRNA [NM_001080466]                                                      | 8.90654 | up | 5.61901  | up | 26.35087    | 3.06351     | 16.04398    | 2.51778     | Detected | Compromised | Detected    | Compromised |
| 490 | A_33_P3363933 | FCRL6     | Hs.196955 | Fc receptor-like 6                                                      | Homo sapiens Fc receptor-like 6 (FCRL6), mRNA [NM_001004310]                                                                   | 8.90051 | up | 2.36260  | up | 43.49829    | 5.06047     | 33.61454    | 12.54593    | Detected | Compromised | Detected    | Compromised |
| 491 | A_23_P139682  | PZP       | Hs.707491 | pregnancy-zone protein                                                  | Homo sapiens pregnancy-zone protein (PZP), mRNA [NM_002864]                                                                    | 8.89916 | up | 1.56918  | up | 338.51840   | 39.38823    | 5.94839     | 3.34267     | Detected | Detected    | Compromised | Compromised |
| 492 | A_23_P344421  | ROBO4     | Hs.524121 | roundabout homolog 4, magic roundabout (Drosophila)                     | Homo sapiens roundabout homolog 4, magic roundabout (Drosophila) (ROBO4), mRNA [NM_019055]                                     | 8.89075 | up | 4.74146  | up | 154.22581   | 17.96187    | 107.01122   | 19.90135    | Detected | Compromised | Detected    | Detected    |
| 493 | A_33_P3393821 | C1R       | Hs.524224 | complement component 1, r subcomponent                                  | Homo sapiens complement component 1, r subcomponent (C1R), mRNA [NM_001733]                                                    | 8.83962 | up | 7.25900  | up | 97825.36000 | 11459.10800 | 89336.28000 | 10852.17700 | Detected | Detected    | Detected    | Detected    |
| 494 | A_33_P3275687 | TBC1D3B   | Hs.454713 | TBC1 domain family, member 3B                                           | Homo sapiens TBC1 domain family, member 3B (TBC1D3B), mRNA [NM_001001417]                                                      | 8.83298 | up | 6.32259  | up | 51.13411    | 5.99428     | 44.80544    | 6.24887     | Detected | Compromised | Detected    | Compromised |
| 495 | A_24_P167642  | GCH1      | Hs.86724  | GTP cyclohydrolase 1                                                    | Homo sapiens GTP cyclohydrolase 1 (GCH1), transcript variant 1, mRNA [NM_000161]                                               | 8.82830 | up | 8.99703  | up | 340.39905   | 39.92495    | 230.72102   | 22.61275    | Detected | Detected    | Detected    | Detected    |
| 496 | A_23_P80974   | TDO2      | Hs.183671 | tryptophan 2,3-dioxygenase                                              | Homo sapiens tryptophan 2,3-dioxygenase (TDO2), mRNA [NM_005651]                                                               | 8.82215 | up | 7.28481  | up | 31.87280    | 3.74092     | 50.39909    | 6.10056     | Detected | Compromised | Detected    | Compromised |
| 497 | A_23_P21063   | SCNSA     | Hs.517898 | sodium channel, voltage-gated, type V, alpha subunit                    | Homo sapiens sodium channel, voltage-gated, type V, alpha subunit (SCNSA), transcript variant 1, mRNA [NM_198056]              | 8.82108 | up | 9.57018  | up | 35.78612    | 4.20074     | 35.08748    | 3.23294     | Detected | Compromised | Detected    | Compromised |
| 498 | A_33_P3323692 |           |           |                                                                         |                                                                                                                                | 8.81146 | up | 6.71130  | up | 34.61069    | 4.06720     | 26.11261    | 3.43091     | Detected | Compromised | Detected    | Compromised |
| 499 | A_24_P182696  | MYO3B     | Hs.671900 | myosin IIIb                                                             | Homo sapiens myosin IIIb (MYO3B), transcript variant 2, mRNA [NM_138995]                                                       | 8.78489 | up | 5.00851  | up | 26.40539    | 3.11236     | 14.61391    | 2.57290     | Detected | Compromised | Detected    | Compromised |
| 500 | A_23_P85082   | RHOXF1    | Hs.644617 | Rhox homeobox family, member 1                                          | Homo sapiens Rhox homeobox family, member 1 (RHOXF1), mRNA [NM_139232]                                                         | 8.74278 | up | 1.88051  | up | 26.52185    | 3.14114     | 21.84637    | 10.24401    | Detected | Compromised | Detected    | Compromised |
| 501 | A_23_P77328   | GCHFR     | Hs.631717 | GTP cyclohydrolase I feedback regulator                                 | Homo sapiens GTP cyclohydrolase I feedback regulator (GCHFR), mRNA [NM_005258]                                                 | 8.73454 | up | 9.57904  | up | 1000.03820  | 118.55219   | 1270.83040  | 116.98530   | Detected | Detected    | Detected    | Detected    |
| 502 | A_23_P11685   | PLA2G4A   | Hs.497200 | phospholipase A2, group IVA (cytosolic, calcium-dependent)              | Homo sapiens phospholipase A2, group IVA (cytosolic, calcium-dependent) (PLA2G4A), mRNA [NM_024420]                            | 8.72787 | up | 9.07815  | up | 931.89905   | 110.55888   | 821.69480   | 79.81390    | Detected | Detected    | Detected    | Detected    |
| 503 | A_23_P63736   | LOC84856  | Hs.55977  | hypothetical LOC84856                                                   | Homo sapiens hypothetical LOC84856 (LOC84856), non-coding RNA [NR_026827]                                                      | 8.71147 | up | 9.24559  | up | 1181.67020  | 140.45530   | 983.54670   | 93.80493    | Detected | Detected    | Detected    | Detected    |
| 504 | A_23_P164814  | C19orf57  | Hs.143288 | chromosome 19 open reading frame 57                                     | Homo sapiens chromosome 19 open reading frame 57 (C19orf57), mRNA [NM_024323]                                                  | 8.70453 | up | 8.64498  | up | 319.39746   | 37.99438    | 273.92140   | 27.94006    | Detected | Detected    | Detected    | Detected    |
| 505 | A_24_P179585  | MARK1     | Hs.497806 | MAP/microtubule affinity-regulating kinase 1                            | Homo sapiens MAP/microtubule affinity-regulating kinase 1 (MARK1), mRNA [NM_018650]                                            | 8.68853 | up | 2.56389  | up | 35.55531    | 4.23732     | 7.49786     | 2.57871     | Detected | Compromised | Compromised | Compromised |
| 506 | A_33_P3293164 | CHGA      | Hs.150793 | chromogranin A (parathyroid secretory protein 1)                        | Homo sapiens chromogranin A (parathyroid secretory protein 1) (CHGA), mRNA [NM_0012175]                                        | 8.68229 | up | 2.72491  | up | 28.87394    | 3.44354     | 22.29040    | 7.21327     | Detected | Compromised | Detected    | Compromised |
| 507 | A_33_P3276435 | FILIP1    | Hs.696158 | filamin A interacting protein 1                                         | Homo sapiens filamin A interacting protein 1 (FILIP1), mRNA [NM_015687]                                                        | 8.67586 | up | 2.03350  | up | 25.60925    | 3.05645     | 13.43503    | 5.82586     | Detected | Compromised | Detected    | Compromised |
| 508 | A_23_P29939   | SNCA      | Hs.21374  | synuclein, alpha (non A4 component of amyloid precursor)                | Homo sapiens synuclein, alpha (non A4 component of amyloid precursor) (SNCA), transcript variant 4, mRNA [NM_007398]           | 8.65166 | up | 9.07805  | up | 532.17030   | 63.69193    | 519.76685   | 50.48723    | Detected | Detected    | Detected    | Detected    |
| 509 | A_33_P3257297 | CCDC147   | Hs.253576 | coiled-coil domain containing 147                                       | Homo sapiens coiled-coil domain containing 147 (CCDC147), mRNA [NM_001008723]                                                  | 8.58491 | up | 9.19480  | up | 934.89276   | 112.76108   | 611.42633   | 58.63641    | Detected | Detected    | Detected    | Detected    |
| 510 | A_33_P3399480 | LOC728052 | Hs.535825 | similar to hCG2031213                                                   | PREDICTED: Homo sapiens hypothetical LOC728052 (LOC728052), mRNA [XM_001717850]                                                | 8.58137 | up | 7.31462  | up | 41.43734    | 4.99998     | 20.49097    | 2.47022     | Detected | Compromised | Detected    | Compromised |
| 511 | A_32_P47157   | LOC92973  | Hs.720274 | hypothetical LOC92973                                                   | Homo sapiens hypothetical LOC92973 (LOC92973), non-coding RNA [NR_024006]                                                      | 8.54971 | up | 6.18356  | up | 25.20415    | 3.05249     | 17.59429    | 2.50899     | Detected | Compromised | Detected    | Compromised |
| 512 | A_23_P19816   | RNF32     | Hs.490715 | ring finger protein 32                                                  | Homo sapiens ring finger protein 32 (RNF32), mRNA [NM_030936]                                                                  | 8.53891 | up | 4.74720  | up | 66.25548    | 8.03438     | 40.36942    | 7.49860     | Detected | Compromised | Detected    | Compromised |
| 513 | A_23_P44466   | CCDC102B  | Hs.280781 | coiled-coil domain containing 102B                                      | Homo sapiens coiled-coil domain containing 102B (CCDC102B), transcript variant 2, mRNA [NM_024781]                             | 8.53441 | up | 11.58575 | up | 64.58260    | 7.83565     | 48.19966    | 3.66847     | Detected | Compromised | Detected    | Compromised |
| 514 | A_33_P3237379 | KCNK1     | Hs.552896 | potassium voltage-gated channel, Shaw-related subfamily, member 1       | Homo sapiens potassium voltage-gated channel, Shaw-related subfamily, member 1 (KCNK1), transcript variant B, mRNA [NM_004976] | 8.53097 | up | 8.15560  | up | 29.11208    | 3.53352     | 27.44197    | 2.96705     | Detected | Compromised | Detected    | Compromised |
| 515 | A_23_P79978   | SLC24A3   | Hs.654790 | solute carrier family 24 (sodium/potassium/calcium exchanger), member 3 | Homo sapiens solute carrier family 24 (sodium/potassium/calcium exchanger), member 3 (SLC24A3), mRNA [NM_020689]               | 8.52277 | up | 9.47874  | up | 2154.42160  | 261.74786   | 1576.61830  | 146.67012   | Detected | Detected    | Detected    | Detected    |
| 516 | A_23_P27306   | COLEC12   | Hs.464422 | collectin sub-family member 12                                          | Homo sapiens collectin sub-family member 12 (COLEC12), mRNA [NM_130386]                                                        | 8.52240 | up | 8.46793  | up | 3279.30300  | 398.43057   | 2427.54000  | 252.78703   | Detected | Detected    | Detected    | Detected    |
| 517 | A_23_P368896  | LRRCS6    | Hs.567855 | leucine rich repeat containing 56                                       | Homo sapiens leucine rich repeat containing 56 (LRRCS6), mRNA [NM_198075]                                                      | 8.51819 | up | 6.86437  | up | 946.60120   | 115.06748   | 944.39990   | 121.31680   | Detected | Detected    | Detected    | Detected    |
| 518 | A_23_P209055  | CD22      | Hs.579691 | CD22 molecule                                                           | Homo sapiens CD22 molecule (CD22), mRNA [NM_001771]                                                                            | 8.51413 | up | 4.90330  | up | 25.63793    | 3.11800     | 14.63540    | 2.63198     | Detected | Compromised | Detected    | Compromised |

|     |               |              |           |                                                                                       |                                                                                                                               |         |    |          |            |            |            |           |          |             |             |             |
|-----|---------------|--------------|-----------|---------------------------------------------------------------------------------------|-------------------------------------------------------------------------------------------------------------------------------|---------|----|----------|------------|------------|------------|-----------|----------|-------------|-------------|-------------|
| 519 | A_23_P77304   | AP3B2        | Hs.199593 | adaptor-related protein complex 3, beta 2 subunit                                     | Homo sapiens adaptor-related protein complex 3, beta 2 subunit (AP3B2), mRNA [NM_004644]                                      | 8.50659 | up | 6.47646  | 74.11170   | 9.02120    | 65.30547   | 8.89155   | Detected | Compromised | Detected    | Compromised |
| 520 | A_33_P3230663 | LOC100130232 | Hs.656046 | LP2209                                                                                | Homo sapiens LP2209 mRNA, complete cds. [AY203990]                                                                            | 8.48325 | up | 8.35175  | 50.07653   | 6.11231    | 24.74789   | 2.61292   | Detected | Compromised | Detected    | Compromised |
| 521 | A_33_P3247175 | C4orf47      | Hs.549398 | chromosome 4 open reading frame 47                                                    | Homo sapiens chromosome 4 open reading frame 47 (C4orf47), mRNA [NM_001143357]                                                | 8.46483 | up | 9.28802  | 162.56609  | 19.88587   | 113.34570  | 10.76087  | Detected | Detected    | Detected    | Compromised |
| 522 | A_23_P204640  | NANOG        | Hs.661360 | Nanog homeobox                                                                        | Homo sapiens Nanog homeobox (NANOG), mRNA [NM_024865]                                                                         | 8.45846 | up | 6.81780  | 129.54599  | 15.85863   | 67.55973   | 8.73794   | Detected | Compromised | Detected    | Compromised |
| 523 | A_23_P54144   | BMP4         | Hs.68879  | bone morphogenetic protein 4                                                          | Homo sapiens bone morphogenetic protein 4 (BMP4), transcript variant 1, mRNA [NM_001202]                                      | 8.45809 | up | 8.30980  | 26.27405   | 3.21653    | 25.27938   | 2.68251   | Detected | Compromised | Detected    | Compromised |
| 524 | A_23_P152002  | BCL2A1       | Hs.227817 | BCL2-related protein A1                                                               | Homo sapiens BCL2-related protein A1 (BCL2A1), transcript variant 1, mRNA [NM_004049]                                         | 8.45745 | up | 11.83541 | 167.29521  | 20.48223   | 149.31548  | 11.12467  | Detected | Detected    | Detected    | Compromised |
| 525 | A_32_P70927   | PAGE2        | Hs.662489 | P antigen family, member 2 (prostate associated)                                      | Homo sapiens P antigen family, member 2 (prostate associated) (PAGE2), mRNA [NM_207339]                                       | 8.45491 | up | 2.82465  | 25.55557   | 3.12975    | 22.32546   | 6.96949   | Detected | Compromised | Detected    | Compromised |
| 526 | A_23_P200670  | WDR78        | Hs.49421  | WD repeat domain 78                                                                   | Homo sapiens WD repeat domain 78 (WDR78), transcript variant 2, mRNA [NM_207014]                                              | 8.45391 | up | 5.90577  | 502.26712  | 61.51915   | 438.36957  | 65.45293  | Detected | Detected    | Detected    | Detected    |
| 527 | A_24_P130936  | DDX3Y        | Hs.99120  | DEAD (Asp-Glu-Ala-Asp) box polypeptide 3, Y-linked                                    | Homo sapiens DEAD (Asp-Glu-Ala-Asp) box polypeptide 3, Y-linked (DDX3Y), transcript variant 2, mRNA [NM_004680]               | 8.44730 | up | 4.80505  | 276.60654  | 33.90607   | 219.05167  | 40.19888  | Detected | Detected    | Detected    | Detected    |
| 528 | A_23_P314755  | STC1         | Hs.25590  | stanniocalcin 1                                                                       | Homo sapiens stanniocalcin 1 (STC1), mRNA [NM_003155]                                                                         | 8.38850 | up | 8.04466  | 2781.67300 | 343.36410  | 2337.79270 | 256.25006 | Detected | Detected    | Detected    | Detected    |
| 529 | A_33_P3233436 | PNMA6A       | Hs.721963 | paraneoplastic antigen like 6A                                                        | Homo sapiens paraneoplastic antigen like 6A (PNMA6A), mRNA [NM_032882]                                                        | 8.38298 | up | 7.91726  | 1203.08510 | 148.60420  | 1632.12610 | 181.77916 | Detected | Detected    | Detected    | Detected    |
| 530 | A_33_P3351175 | WNK2         | Hs.654856 | WNK lysine deficient protein kinase 2                                                 | Homo sapiens WNK lysine deficient protein kinase 2 (WNK2), mRNA [NM_006648]                                                   | 8.38194 | up | 5.60014  | 28.41998   | 3.51085    | 20.12625   | 3.16905   | Detected | Compromised | Detected    | Compromised |
| 531 | A_33_P3371341 | FAM66C       | Hs.512257 | family with sequence similarity 66, member C                                          | Homo sapiens family with sequence similarity 66, member C (FAM66C), non-coding RNA [NR_026788]                                | 8.33006 | up | 7.67553  | 104.23381  | 12.95668   | 56.71936   | 6.51611   | Detected | Compromised | Detected    | Compromised |
| 532 | A_33_P3400147 | TLE6         | Hs.334507 | transducin-like enhancer of split 6 (Esp1) homolog, Drosophila                        | Homo sapiens transducin-like enhancer of split 6 (Esp1) homolog, Drosophila (TLE6), transcript variant 1, mRNA [NM_001143986] | 8.30741 | up | 5.89706  | 54.14709   | 6.74904    | 53.50415   | 8.00051   | Detected | Compromised | Detected    | Compromised |
| 533 | A_24_P247026  | FAM154B      | Hs.459117 | family with sequence similarity 154, member B                                         | Homo sapiens family with sequence similarity 154, member B (FAM154B), mRNA [NM_001008228]                                     | 8.30256 | up | 5.08427  | 25.75222   | 3.21171    | 15.53116   | 2.69365   | Detected | Compromised | Detected    | Compromised |
| 534 | A_33_P3245120 | LOC200772    | Hs.647893 | hypothetical protein LOC200772                                                        | Homo sapiens, clone IMAGE:5745636, mRNA [BC040629]                                                                            | 8.29697 | up | 23.85590 | 142.66220  | 17.80421   | 144.66664  | 5.34734   | Detected | Detected    | Detected    | Compromised |
| 535 | A_24_P472007  | UNC13A       | Hs.164502 | unc-13 homolog A (C. elegans)                                                         | Homo sapiens unc-13 homolog A (C. elegans) (UNC13A), mRNA [NM_001080421]                                                      | 8.28609 | up | 5.85882  | 32.32014   | 4.03884    | 17.77806   | 2.67663   | Detected | Compromised | Detected    | Compromised |
| 536 | A_33_P3254431 | LOC100128003 |           | hypothetical protein LOC100128003                                                     | Homo sapiens hypothetical protein LOC100128003 (LOC100128003), non-coding RNA [NR_024445]                                     | 8.25627 | up | 2.76380  | 52.81763   | 6.62412    | 15.01266   | 4.78979   | Detected | Compromised | Compromised | Compromised |
| 537 | A_33_P3330209 | AUTS2        | Hs.21631  | autism susceptibility candidate 2                                                     | Homo sapiens autism susceptibility candidate 2 (AUTS2), transcript variant 3, mRNA [NM_001127232]                             | 8.24780 | up | 6.89733  | 106.54691  | 13.37630   | 99.80445   | 12.75952  | Detected | Compromised | Detected    | Detected    |
| 538 | A_23_P98686   | ATHL1        | Hs.353181 | ATH1, acid trehalase-like 1 (yeast)                                                   | Homo sapiens ATH1, acid trehalase-like 1 (yeast) (ATHL1), mRNA [NM_025092]                                                    | 8.23778 | up | 8.60605  | 1742.68200 | 219.04900  | 1547.57510 | 158.56718 | Detected | Detected    | Detected    | Detected    |
| 539 | A_33_P3333282 | FGF11        | Hs.655193 | fibroblast growth factor 11                                                           | Homo sapiens fibroblast growth factor 11 (FGF11), mRNA [NM_004112]                                                            | 8.21253 | up | 8.83962  | 113.39652  | 14.29735   | 91.81173   | 9.15862   | Detected | Compromised | Detected    | Compromised |
| 540 | A_24_P250922  | PTGS2        | Hs.196384 | prostaglandin-endoperoxide synthase 2 (prostaglandin G/H synthase and cyclooxygenase) | Homo sapiens prostaglandin-endoperoxide synthase 2 (prostaglandin G/H synthase and cyclooxygenase) (PTGS2), mRNA [NM_000963]  | 8.19191 | up | 8.81709  | 1656.07690 | 209.32854  | 1191.17150 | 119.12826 | Detected | Detected    | Detected    | Detected    |
| 541 | A_33_P3292196 | PNMA6A       | Hs.721963 | paraneoplastic antigen like 6A                                                        | Homo sapiens paraneoplastic antigen like 6A (PNMA6A), mRNA [NM_032882]                                                        | 8.18830 | up | 8.28970  | 152.08212  | 19.23169   | 169.55922  | 18.03632  | Detected | Detected    | Detected    | Detected    |
| 542 | A_23_P166508  | LOC100134361 | Hs.335413 | similar to hCG1811002                                                                 | PREDICTED: Homo sapiens hypothetical LOC100134361 (LOC100134361), mRNA [XM_001726827]                                         | 8.15863 | up | 18.29105 | 705.41660  | 89.52860   | 702.20780  | 33.85265  | Detected | Detected    | Detected    | Detected    |
| 543 | A_23_P345692  | IL17D        | Hs.655142 | interleukin 17D                                                                       | Homo sapiens interleukin 17D (IL17D), mRNA [NM_138284]                                                                        | 8.15196 | up | 7.69389  | 1784.27080 | 226.63747  | 1443.01650 | 165.38304 | Detected | Detected    | Detected    | Detected    |
| 544 | A_23_P5983    | PLTP         | Hs.439312 | phospholipid transfer protein                                                         | Homo sapiens phospholipid transfer protein (PLTP), transcript variant 1, mRNA [NM_006227]                                     | 8.14628 | up | 8.80226  | 3554.11060 | 451.75687  | 4003.48320 | 401.05980 | Detected | Detected    | Detected    | Detected    |
| 545 | A_23_P57474   | OSBP2        | Hs.517546 | oxysterol binding protein 2                                                           | Homo sapiens oxysterol binding protein 2 (OSBP2), transcript variant 1, mRNA [NM_030758]                                      | 8.12138 | up | 9.23521  | 106.95686  | 13.63679   | 84.62169   | 8.07980   | Detected | Compromised | Detected    | Compromised |
| 546 | A_33_P3338186 | HEXDC        | Hs.444743 | hexosaminidase (glycosyl hydrolase family 20, catalytic domain) containing            | Homo sapiens hexosaminidase (glycosyl hydrolase family 20, catalytic domain) containing (HEXDC), mRNA [NM_173820]             | 8.09436 | up | 7.10755  | 8314.43500 | 1063.61190 | 6559.04830 | 813.74133 | Detected | Detected    | Detected    | Detected    |
| 547 | A_33_P3379091 | SYNGR1       | Hs.216226 | synaptogyrin 1                                                                        | Homo sapiens synaptogyrin 1 (SYNGR1), transcript variant 1b, mRNA [NM_145731]                                                 | 8.07832 | up | 7.92747  | 880.93414  | 112.91608  | 891.82170  | 99.19933  | Detected | Detected    | Detected    | Detected    |
| 548 | A_33_P3290780 | IL24         | Hs.719320 | interleukin 24                                                                        | Homo sapiens interleukin 24 (IL24), transcript variant 1, mRNA [NM_006850]                                                    | 8.04391 | up | 8.44953  | 649.64110  | 83.62560   | 836.68066  | 87.31576  | Detected | Detected    | Detected    | Detected    |
| 549 | A_33_P3319140 | OVOS2        | Hs.524331 | ovostatin 2                                                                           | Homo sapiens ovostatin 2, mRNA (cDNA clone IMAGE:4927636), [BC039117]                                                         | 8.03633 | up | 4.74312  | 73.18561   | 9.42977    | 53.39385   | 9.92642   | Detected | Compromised | Detected    | Compromised |

|     |               |            |           |                                                                                   |                                                                                                                           |         |    |          |    |            |           |            |           |          |             |             |             |
|-----|---------------|------------|-----------|-----------------------------------------------------------------------------------|---------------------------------------------------------------------------------------------------------------------------|---------|----|----------|----|------------|-----------|------------|-----------|----------|-------------|-------------|-------------|
| 550 | A_23_P216812  | CDKN2B     | Hs.72901  | cyclin-dependent kinase inhibitor 2B (p15, inhibits CDK4)                         | Homo sapiens cyclin-dependent kinase inhibitor 2B (p15, inhibits CDK4) (CDKN2B), transcript variant 1, mRNA [NM_004936]   | 8.01473 | up | 6.31469  | up | 105.57578  | 13.63982  | 123.55238  | 17.25301  | Detected | Compromised | Detected    | Detected    |
| 551 | A_32_P456318  | SFRS13B    | Hs.254414 | splicing factor, arginine/serine-rich 13B                                         | Homo sapiens splicing factor, arginine/serine-rich 13B (SFRS13B), mRNA [NM_080743]                                        | 8.00781 | up | 1.15321  | up | 37.40963   | 4.83730   | 24.75887   | 18.93168  | Detected | Compromised | Detected    | Detected    |
| 552 | A_33_P3355921 |            | Hs.678899 |                                                                                   | cDNA FLJ37701 fis, clone BRHIP201690HCG198535 : [Source:UniProtKB/TrEMBL;Acc:Q8N9D1] [ENST00000398177]                    | 7.99882 | up | 14.97550 | up | 90.64121   | 11.73364  | 45.11845   | 2.65667   | Detected | Compromised | Detected    | Compromised |
| 553 | A_23_P254181  | MGC5566    | Hs.255479 | hypothetical protein MGC5566                                                      | Homo sapiens hypothetical protein MGC5566, mRNA (cDNA clone IMAGE3458308), [BC000849]                                     | 7.97111 | up | 8.69939  | up | 188.44904  | 24.47981  | 212.33977  | 21.52325  | Detected | Detected    | Detected    | Detected    |
| 554 | A_23_P209288  | CUL3       | Hs.372286 | culin 3                                                                           | Homo sapiens cullin 3 (CUL3), mRNA [NM_003590]                                                                            | 7.96038 | up | 9.63882  | up | 84.66550   | 11.01301  | 75.32278   | 6.89077   | Detected | Compromised | Detected    | Compromised |
| 555 | A_33_P3335366 | MAML3      | Hs.586165 | mastermind-like 3 (Drosophila)                                                    | Homo sapiens mastermind-like 3 (Drosophila) (MAML3), mRNA [NM_018717]                                                     | 7.95240 | up | 7.11715  | up | 43.66573   | 5.68559   | 44.18113   | 5.47389   | Detected | Compromised | Detected    | Compromised |
| 556 | A_23_P105963  | AK7        | Hs.667462 | adenylate kinase 7                                                                | Homo sapiens adenylate kinase 7 (AK7), mRNA [NM_152327]                                                                   | 7.95174 | up | 6.89834  | up | 44.38477   | 5.77970   | 41.50077   | 5.30490   | Detected | Compromised | Detected    | Compromised |
| 557 | A_23_P101407  | C3         | Hs.529053 | complement component 3                                                            | Homo sapiens complement component 3 (C3), mRNA [NM_000064]                                                                | 7.94058 | up | 9.33844  | up | 4513.73240 | 588.59515 | 3410.00150 | 321.99243 | Detected | Detected    | Detected    | Detected    |
| 558 | A_32_P59678   | C7orf46    | Hs.592178 | chromosome 7 open reading frame 46                                                | Homo sapiens chromosome 7 open reading frame 46 (C7orf46), transcript variant 2, mRNA [NM_001127364]                      | 7.93099 | up | 8.96531  | up | 73.48454   | 9.59404   | 71.73080   | 7.05514   | Detected | Compromised | Detected    | Compromised |
| 559 | A_23_P30666   | TNFRSF21   | Hs.443577 | tumor necrosis factor receptor superfamily, member 21                             | Homo sapiens tumor necrosis factor receptor superfamily, member 21 (TNFRSF21), mRNA [NM_014452]                           | 7.91594 | up | 7.76166  | up | 7500.66460 | 981.13820 | 6455.31150 | 733.37820 | Detected | Detected    | Detected    | Detected    |
| 560 | A_23_P5018    | LOC80054   | Hs.287521 | hypothetical LOC80054                                                             | Homo sapiens hypothetical LOC80054 (LOC80054), non-coding RNA [NR_026887]                                                 | 7.89870 | up | 4.97715  | up | 29.94474   | 3.92553   | 33.00670   | 5.84772   | Detected | Compromised | Detected    | Compromised |
| 561 | A_23_P64792   | KCNMB4     | Hs.525529 | potassium large conductance calcium-activated channel, subfamily M, beta member 4 | Homo sapiens potassium large conductance calcium-activated channel, subfamily M, beta member 4 (KCNMB4), mRNA [NM_014505] | 7.88355 | up | 7.47561  | up | 2530.45070 | 332.36047 | 2179.88650 | 257.12985 | Detected | Detected    | Detected    | Detected    |
| 562 | A_33_P3232692 | IL24       | Hs.719320 | interleukin 24                                                                    | Homo sapiens interleukin 24 (IL24), transcript variant 1, mRNA [NM_006850]                                                | 7.85889 | up | 8.30030  | up | 5098.97800 | 671.82294 | 4074.78690 | 432.88904 | Detected | Detected    | Detected    | Detected    |
| 563 | A_33_P3219840 | NCRNA00171 | Hs.653168 | non-protein coding RNA 171                                                        | Homo sapiens non-protein coding RNA 171 (NCRNA00171), non-coding RNA [NR_026751]                                          | 7.85330 | up | 5.59349  | up | 105.55917  | 13.91801  | 89.23410   | 14.06738  | Detected | Compromised | Detected    | Compromised |
| 564 | A_23_P53763   | C13orf18   | Hs.98117  | chromosome 13 open reading frame 18                                               | Homo sapiens chromosome 13 open reading frame 18 (C13orf18), mRNA [NM_025113]                                             | 7.84288 | up | 8.20862  | up | 765.34607  | 101.04516 | 529.63650  | 56.89488  | Detected | Detected    | Detected    | Detected    |
| 565 | A_23_P66017   | PRRT2      | Hs.655071 | proline-rich transmembrane protein 2                                              | Homo sapiens proline-rich transmembrane protein 2 (PRRT2), mRNA [NM_145239]                                               | 7.84249 | up | 7.79280  | up | 1851.86720 | 244.50580 | 1928.21040 | 218.18588 | Detected | Detected    | Detected    | Detected    |
| 566 | A_32_P125338  | FAM43B     | Hs.429179 | family with sequence similarity 43, member B                                      | Homo sapiens family with sequence similarity 43, member B (FAM43B), mRNA [NM_207334]                                      | 7.84149 | up | 6.38987  | up | 159.30914  | 21.03658  | 120.04231  | 16.56563  | Detected | Detected    | Detected    | Detected    |
| 567 | A_24_P366509  | PIK3R6     | Hs.255809 | phosphoinositide-3-kinase, regulatory subunit 6                                   | Homo sapiens phosphoinositide-3-kinase, regulatory subunit 6 (PIK3R6), mRNA [NM_001010855]                                | 7.82701 | up | 4.08911  | up | 25.60742   | 3.38769   | 22.77060   | 4.91033   | Detected | Compromised | Detected    | Compromised |
| 568 | A_33_P3270767 | TSC22D2    | Hs.665220 | TSC22 domain family, member 2                                                     | RST23433 Athersys RAGE Library<br>Homo sapiens cDNA, mRNA sequence [BG204039]                                             | 7.82025 | up | 5.37405  | up | 23.16541   | 3.06727   | 15.49602   | 2.54264   | Detected | Compromised | Detected    | Compromised |
| 569 | A_33_P3260223 | CYorf15B   | Hs.592254 | chromosome Y open reading frame 15B                                               | Homo sapiens chromosome Y open reading frame 15B (CYorf15B), mRNA [NM_032576]                                             | 7.81634 | up | 24.08387 | up | 756.09600  | 100.16287 | 471.55392  | 17.26516  | Detected | Detected    | Detected    | Compromised |
| 570 | A_24_P7790    | WFDC10B    | Hs.237392 | WAP four-disulfide core domain 10B                                                | Homo sapiens WAP four-disulfide core domain 10B (WFDC10B), transcript variant 1, mRNA [NM_172006]                         | 7.79049 | up | 4.34465  | up | 31.88236   | 4.23759   | 18.86051   | 3.82794   | Detected | Compromised | Detected    | Compromised |
| 571 | A_23_P315772  | KCND1      | Hs.55276  | potassium voltage-gated channel, Shal-related subfamily, member 1                 | Homo sapiens potassium voltage-gated channel, Shal-related subfamily, member 1 (KCND1), mRNA [NM_004979]                  | 7.78910 | up | 3.75876  | up | 48.49635   | 6.44696   | 26.60850   | 6.24225   | Detected | Compromised | Detected    | Compromised |
| 572 | A_33_P3316273 | CCL3       | Hs.514107 | chemokine (C-C motif) ligand 3                                                    | Homo sapiens chemokine (C-C motif) ligand 3 (CCL3), mRNA [NM_002983]                                                      | 7.77769 | up | 8.54236  | up | 225.88904  | 30.07306  | 171.57172  | 17.71060  | Detected | Detected    | Detected    | Detected    |
| 573 | A_23_P203957  | TMTC1      | Hs.401954 | transmembrane and tetrapeptide repeat containing 1                                | Homo sapiens transmembrane and tetrapeptide repeat containing 1 (TMTC1), mRNA [NM_175861]                                 | 7.77614 | up | 8.93069  | up | 2082.08080 | 277.24670 | 1652.38620 | 163.15189 | Detected | Detected    | Detected    | Detected    |
| 574 | A_24_P145019  |            | Hs.720676 |                                                                                   | cDNA FLJ38235 fis, clone FCBBF2005428<br>[Source:UniProtKB/TrEMBL;Acc:Q8N9B4] [ENST00000356642]                           | 7.76685 | up | 3.57712  | up | 23.59186   | 3.14441   | 10.63042   | 2.62049   | Detected | Compromised | Compromised | Compromised |
| 575 | A_33_P3340324 | hCG_38984  | Hs.170876 | hCG_38984                                                                         | PREDICTED: Homo sapiens hCG38984 (LOC345051), miscRNA [XR_040587]                                                         | 7.76360 | up | 10.94891 | up | 156.81924  | 20.91556  | 128.38272  | 10.33954  | Detected | Detected    | Detected    | Compromised |
| 576 | A_24_P298587  | C8ORFK29   | Hs.122231 | hypothetical LOC340393                                                            | Homo sapiens hypothetical LOC340393 (C8ORFK29), non-coding RNA [NR_015428]                                                | 7.75522 | up | 6.22087  | up | 94.84693   | 12.66375  | 95.65533   | 13.55888  | Detected | Compromised | Detected    | Compromised |
| 577 | A_24_P305038  | C17orf69   |           | chromosome 17 open reading frame 69                                               | Homo sapiens chromosome 17 open reading frame 69 (C17orf69), transcript variant 1, non-coding RNA [NR_026905]             | 7.74112 | up | 6.59887  | up | 64.70684   | 8.65525   | 76.28774   | 10.19415  | Detected | Compromised | Detected    | Compromised |
| 578 | A_33_P3477521 | LOC284080  | Hs.274864 | hypothetical protein LOC284080                                                    | Homo sapiens cDNA FLJ39442 fis, clone PROST2005904 [AK096761]                                                             | 7.73789 | up | 7.35760  | up | 189.52510  | 25.36165  | 105.45741  | 12.63881  | Detected | Detected    | Detected    | Compromised |
| 579 | A_24_P289299  | GEFT       | Hs.61581  | RhoA/RAC/CDC42 exchange factor                                                    | Homo sapiens RhoA/RAC/CDC42 exchange factor (GEFT), transcript variant 1, mRNA [NM_182947]                                | 7.72623 | up | 4.02937  | up | 119.51981  | 16.01789  | 127.23877  | 27.84503  | Detected | Detected    | Detected    | Detected    |
| 580 | A_33_P3216945 |            | Hs.640952 |                                                                                   | DB028988 TEST12: Homo sapiens cDNA clone TEST12012045 5', mRNA sequence [DB028988]                                        | 7.70252 | up | 8.16420  | up | 797.80725  | 107.25018 | 700.73096  | 75.68382  | Detected | Detected    | Detected    | Detected    |

|     |               |              |           |                                                                             |                                                                                                                            |         |    |          |    |             |            |             |            |          |             |             |             |
|-----|---------------|--------------|-----------|-----------------------------------------------------------------------------|----------------------------------------------------------------------------------------------------------------------------|---------|----|----------|----|-------------|------------|-------------|------------|----------|-------------|-------------|-------------|
| 581 | A_33_P3535649 | FLYWCH1      | Hs.655321 | FLYWCH-type zinc finger 1                                                   | Homo sapiens FLYWCH-type zinc finger 1 (FLYWCH1), transcript variant 1, mRNA [NM_032296]                                   | 7.68000 | up | 8.05731  | up | 375.83410   | 50.67199   | 362.68710   | 39.69240   | Detected | Detected    | Detected    | Detected    |
| 582 | A_23_P205738  | BCL11B       | Hs.709690 | B-cell CLL/lymphoma 11B (zinc finger protein)                               | Homo sapiens B-cell CLL/lymphoma 11B (zinc finger protein) (BCL11B), transcript variant 1, mRNA [NM_158576]                | 7.67555 | up | 11.47816 | up | 364.73890   | 49.20457   | 272.20856   | 20.91197   | Detected | Detected    | Detected    | Detected    |
| 583 | A_33_P3230478 | C1S          | Hs.458355 | complement component 1, s subcomponent                                      | Homo sapiens complement component 1, s subcomponent (C1S), transcript variant 1, mRNA [NM_201442]                          | 7.67387 | up | 7.08031  | up | 3915.60230  | 528.34470  | 3311.75100  | 412.44962  | Detected | Detected    | Detected    | Detected    |
| 584 | A_33_P3740529 | LOC645485    | Hs.232332 | hypothetical LOC645485                                                      | Homo sapiens, clone IMAGE:5741993, mRNA [BC039526]                                                                         | 7.65914 | up | 2.64696  | up | 23.93516    | 3.23586    | 16.16532    | 5.38520    | Detected | Compromised | Detected    | Compromised |
| 585 | A_23_P113613  | CDCP1        | Hs.476093 | CUB domain containing protein 1                                             | Homo sapiens CUB domain containing protein 1 (CDCP1), transcript variant 1, mRNA [NM_022842]                               | 7.65075 | up | 7.94523  | up | 1550.28330  | 209.81682  | 1471.51890  | 163.31450  | Detected | Detected    | Detected    | Detected    |
| 586 | A_23_P102611  | WISP2        | Hs.592145 | WNT1 inducible signaling pathway protein 2                                  | Homo sapiens WNT1 inducible signaling pathway protein 2 (WISP2), mRNA [NM_003881]                                          | 7.63944 | up | 6.72916  | up | 13860.26300 | 1878.63890 | 13252.32000 | 1736.58600 | Detected | Detected    | Detected    | Detected    |
| 587 | A_24_P202319  | ATP2A3       | Hs.513870 | ATPase, Ca++ transporting, ubiquitous                                       | Homo sapiens ATPase, Ca++ transporting, ubiquitous (ATP2A3), transcript variant 7, mRNA [NM_174958]                        | 7.63152 | up | 3.54322  | up | 24.27437    | 3.29360    | 32.57851    | 8.10773    | Detected | Compromised | Detected    | Compromised |
| 588 | A_33_P3671291 | SNORA12      | Hs.662165 | small nucleolar RNA, H/ACA box 12                                           | EST91069 Synovial sarcoma Homo sapiens cDNA 5' end, mRNA sequence [AA378382]                                               | 7.61973 | up | 7.82452  | up | 642.27500   | 87.27995   | 609.14620   | 68.64820   | Detected | Detected    | Detected    | Detected    |
| 589 | A_32_P96036   | MEX3A        | Hs.591496 | mex-3 homolog A (C. elegans)                                                | Homo sapiens mex-3 homolog A (C. elegans) (MEX3A), mRNA [NM_001093725]                                                     | 7.61670 | up | 7.13788  | up | 725.40920   | 98.61645   | 455.00530   | 56.20992   | Detected | Detected    | Detected    | Detected    |
| 590 | A_33_P3356587 | LOC100134040 | Hs.552781 | hypothetical LOC100134040                                                   | Homo sapiens mRNA; cDNA DKFZp434G1726 (from clone DKFZp434G1726) [AL162052]                                                | 7.59399 | up | 6.01596  | up | 149.45530   | 20.37862   | 85.51138    | 12.53385   | Detected | Detected    | Detected    | Compromised |
| 591 | A_33_P3261298 | SLC6A7       | Hs.241597 | solute carrier family 6 (neurotransmitter transporter, L-proline), member 7 | Homo sapiens solute carrier family 6 (neurotransmitter transporter, L-proline), member 7 (SLC6A7), mRNA [NM_014228]        | 7.57180 | up | 14.71027 | up | 130.13478   | 17.79621   | 96.49406    | 5.78423    | Detected | Detected    | Detected    | Compromised |
| 592 | A_33_P3302260 | C11orf9      | Hs.473109 | chromosome 11 open reading frame 9                                          | Homo sapiens chromosome 11 open reading frame 9 (C11orf9), transcript variant 1, mRNA [NM_013279]                          | 7.56261 | up | 2.76341  | up | 50.79312    | 6.95451    | 14.61400    | 4.66326    | Detected | Compromised | Detected    | Compromised |
| 593 | A_24_P135748  | GRTP1        | Hs.170904 | growth hormone regulated TBC protein 1                                      | Homo sapiens growth hormone regulated TBC protein 1 (GRTP1), mRNA [NM_024719]                                              | 7.56150 | up | 10.19003 | up | 110.03301   | 15.06774   | 111.97868   | 9.69003    | Detected | Compromised | Detected    | Compromised |
| 594 | A_33_P3391120 | LOC646870    | Hs.674889 | hypothetical protein LOC646870                                              | PREDICTED: Homo sapiens hypothetical protein LOC646870 (LOC646870), miscRNA [XR_040282]                                    | 7.55422 | up | 5.19235  | up | 24.84197    | 3.40510    | 18.12376    | 3.07787    | Detected | Compromised | Detected    | Compromised |
| 595 | A_23_P252082  | TMEM176A     | Hs.647116 | transmembrane protein 176A                                                  | Homo sapiens transmembrane protein 176A (TMEM176A), mRNA [NM_018487]                                                       | 7.51730 | up | 9.63331  | up | 256.53650   | 35.33626   | 304.49338   | 27.87198   | Detected | Detected    | Detected    | Detected    |
| 596 | A_33_P3251562 | RSPO1        | Hs.135015 | R-spondin homolog (Xenopus laevis)                                          | Homo sapiens R-spondin homolog (Xenopus laevis) (RSPO1), mRNA [NM_001038633]                                               | 7.51680 | up | 8.03557  | up | 35.83232    | 4.93599    | 22.71169    | 2.49229    | Detected | Compromised | Detected    | Compromised |
| 597 | A_24_P403417  | PTGES        | Hs.146688 | prostaglandin E synthase                                                    | Homo sapiens prostaglandin E synthase (PTGES), mRNA [NM_004878]                                                            | 7.51213 | up | 7.39460  | up | 1509.08740  | 208.01013  | 1316.15000  | 156.94815  | Detected | Detected    | Detected    | Detected    |
| 598 | A_23_P218086  | TPCN1        | Hs.524763 | two pore segment channel 1                                                  | Homo sapiens two pore segment channel 1 (TPCN1), transcript variant 1, mRNA [NM_001143819]                                 | 7.50966 | up | 6.86498  | up | 24734.60200 | 3410.49950 | 15893.71900 | 2041.51070 | Detected | Detected    | Detected    | Detected    |
| 599 | A_23_P356425  | C1orf125     | Hs.658505 | chromosome 1 open reading frame 125                                         | Homo sapiens chromosome 1 open reading frame 125 (C1orf125), transcript variant 1, mRNA [NM_144896]                        | 7.50919 | up | 7.02896  | up | 51.96343    | 7.16536    | 26.74605    | 3.35532    | Detected | Compromised | Detected    | Compromised |
| 600 | A_23_P165624  | TNFAIP6      | Hs.437322 | tumor necrosis factor, alpha-induced protein 6                              | Homo sapiens tumor necrosis factor, alpha-induced protein 6 (TNFAIP6), mRNA [NM_007115]                                    | 7.50887 | up | 7.44853  | up | 3267.00240  | 450.51390  | 3085.84670  | 365.31656  | Detected | Detected    | Detected    | Detected    |
| 601 | A_33_P3489675 | PRR5-ARHGAP8 | Hs.720401 | PRR5-ARHGAP8 readthrough                                                    | Homo sapiens PRR5-ARHGAP8 fusion (LOC553158), mRNA [NM_181334]                                                             | 7.50606 | up | 9.10672  | up | 35.05180    | 4.83539    | 33.34568    | 3.22881    | Detected | Compromised | Detected    | Compromised |
| 602 | A_23_P304897  | BDKRB2       | Hs.654542 | bradykinin receptor B2                                                      | Homo sapiens bradykinin receptor B2 (BDKRB2), mRNA [NM_000623]                                                             | 7.49730 | up | 7.00011  | up | 7759.26500  | 1071.63960 | 7206.35000  | 907.77020  | Detected | Detected    | Detected    | Detected    |
| 603 | A_33_P3877349 | LOC440173    |           | hypothetical LOC440173                                                      | Homo sapiens hypothetical LOC440173 (LOC440173), non-coding RNA [NR_027471]                                                | 7.46742 | up | 5.36045  | up | 27.75637    | 3.84880    | 19.76743    | 3.25173    | Detected | Compromised | Detected    | Compromised |
| 604 | A_33_P3266780 | PODXL2       | Hs.591290 | podocalyxin-like 2                                                          | Homo sapiens podocalyxin-like 2 (PODXL2), mRNA [NM_015720]                                                                 | 7.40972 | up | 2.87423  | up | 24.97647    | 3.49030    | 11.10032    | 3.40549    | Detected | Compromised | Compromised | Compromised |
| 605 | A_32_P453321  | C1orf228     | Hs.173679 | chromosome 1 open reading frame 228                                         | Homo sapiens chromosome 1 open reading frame 228 (C1orf228), mRNA [NM_001145636]                                           | 7.40199 | up | 6.39397  | up | 112.67412   | 15.76191   | 108.05853   | 14.90232   | Detected | Detected    | Detected    | Detected    |
| 606 | A_23_P79518   | IL1B         | Hs.126256 | interleukin 1, beta                                                         | Homo sapiens interleukin 1, beta (IL1B), mRNA [NM_000576]                                                                  | 7.37966 | up | 7.91385  | up | 1613.51530  | 226.39677  | 1139.80290  | 127.00109  | Detected | Detected    | Detected    | Detected    |
| 607 | A_33_P3388006 | CCDC52       | Hs.477144 | coiled-coil domain containing 52                                            | Homo sapiens coiled-coil domain containing 52 (CCDC52), mRNA [NM_144718]                                                   | 7.37023 | up | 3.79944  | up | 21.44811    | 3.01329    | 12.21372    | 2.83461    | Detected | Compromised | Detected    | Compromised |
| 608 | A_33_P3218925 | STEAP2       | Hs.489051 | six transmembrane epithelial antigen of the prostate 2                      | Homo sapiens six transmembrane epithelial antigen of the prostate 2 (STEAP2), transcript variant 1, mRNA [NM_152999]       | 7.35935 | up | 8.26298  | up | 101.28952   | 14.25143   | 69.37874    | 7.40381    | Detected | Compromised | Detected    | Compromised |
| 609 | A_24_P28722   | RSAD2        | Hs.17518  | radical S-adenosyl methionine domain containing 2                           | Homo sapiens radical S-adenosyl methionine domain containing 2 (RSAD2), mRNA [NM_080657]                                   | 7.33513 | up | 9.49808  | up | 25.38974    | 3.58413    | 26.39944    | 2.45089    | Detected | Compromised | Detected    | Compromised |
| 610 | A_24_P246841  | SLC25A27     | Hs.40510  | solute carrier family 25, member 27                                         | Homo sapiens solute carrier family 25, member 27 (SLC25A27), nuclear gene encoding mitochondrial protein, mRNA [NM_004277] | 7.32929 | up | 7.75624  | up | 104.70060   | 14.79177   | 69.97617    | 7.95545    | Detected | Compromised | Detected    | Compromised |

|     |               |            |           |                                                                                                                                                          |                                                                                                                                                                                                  |         |    |          |    |             |            |            |            |          |             |             |             |
|-----|---------------|------------|-----------|----------------------------------------------------------------------------------------------------------------------------------------------------------|--------------------------------------------------------------------------------------------------------------------------------------------------------------------------------------------------|---------|----|----------|----|-------------|------------|------------|------------|----------|-------------|-------------|-------------|
| 611 | A_23_P403898  | PTPN3      | Hs.436429 | protein tyrosine phosphatase, non-receptor type 3                                                                                                        | Homo sapiens protein tyrosine phosphatase, non-receptor type 3 (PTPN3), transcript variant 1, mRNA [NM_002829]                                                                                   | 7.31743 | up | 6.16256  | up | 332.30313   | 47.02288   | 203.04002  | 29.05266   | Detected | Detected    | Detected    | Detected    |
| 612 | A_33_P3381338 | TNXB       | Hs.485104 | tenascin XB                                                                                                                                              | Homo sapiens tenascin XB (TNXB), transcript variant XB, mRNA [NM_019105]                                                                                                                         | 7.31668 | up | 7.48042  | up | 1737.41860  | 245.88000  | 1497.45800 | 176.52000  | Detected | Detected    | Detected    | Detected    |
| 613 | A_23_P131676  | CXCR7      | Hs.471751 | chemokine (C-X-C motif) receptor 7                                                                                                                       | Homo sapiens chemokine (C-X-C motif) receptor 7 (CXCR7), mRNA [NM_020311]                                                                                                                        | 7.30382 | up | 6.65820  | up | 11804.55300 | 1673.52610 | 9467.92000 | 1253.90190 | Detected | Detected    | Detected    | Detected    |
| 614 | A_33_P3212716 |            | Hs.640952 |                                                                                                                                                          | DB028998 TEST12 Homo sapiens cDNA clone TEST12012045 5', mRNA sequence [DB028998]                                                                                                                | 7.29581 | up | 8.69042  | up | 656.72656   | 93.20602   | 610.00446  | 61.89534   | Detected | Detected    | Detected    | Detected    |
| 615 | A_24_P217234  | SLC3A1     | Hs.112916 | solute carrier family 3 (cystine, dibasic and neutral amino acid transporters, activator of cystine, dibasic and neutral amino acid transport), member 1 | Homo sapiens solute carrier family 3 (cystine, dibasic and neutral amino acid transporters, activator of cystine, dibasic and neutral amino acid transport), member 1 (SLC3A1), mRNA [NM_000341] | 7.28255 | up | 3.49631  | up | 28.52974    | 3.34555    | 19.30765   | 4.86951    | Detected | Compromised | Detected    | Compromised |
| 616 | A_23_P79108   | ATP8B3     | Hs.306212 | ATPase, class I, type 8B, member 3                                                                                                                       | Homo sapiens ATPase, class I, type 8B, member 3 (ATP8B3), mRNA [NM_138813]                                                                                                                       | 7.27230 | up | 3.56536  | up | 72.12391    | 10.26929   | 50.27422   | 12.43389   | Detected | Compromised | Detected    | Compromised |
| 617 | A_33_P3287223 | DPP4       | Hs.368912 | dipeptidyl-peptidase 4                                                                                                                                   | Homo sapiens dipeptidyl-peptidase 4 (DPP4), mRNA [NM_001935]                                                                                                                                     | 7.26734 | up | 6.81552  | up | 5817.76170  | 828.92180  | 5390.58060 | 697.43190  | Detected | Detected    | Detected    | Detected    |
| 618 | A_33_P3216928 |            |           |                                                                                                                                                          | Putative uncharacterized protein C1orf191 Precursor [Source:UniProtKB/Swiss-Prot;Acc:Q7Z2R9] [ENST00000361350]                                                                                   | 7.26379 | up | 2.07738  | up | 22.48648    | 3.20547    | 6.38011    | 2.70818    | Detected | Compromised | Compromised | Compromised |
| 619 | A_23_P61057   | IL16       | Hs.459095 | interleukin 16 (lymphocyte chemoattractant factor)                                                                                                       | Homo sapiens interleukin 16 (lymphocyte chemoattractant factor) (IL16), transcript variant 1, mRNA [NM_004513]                                                                                   | 7.26055 | up | 4.25595  | up | 63.03963    | 8.99036    | 88.42661   | 18.32111   | Detected | Compromised | Detected    | Detected    |
| 620 | A_33_P3358042 |            | Hs.675311 |                                                                                                                                                          | Liver-related low express protein 1 [Source:UniProtKB/TrEMBL;Acc:G6SA06] [ENST00000431436]                                                                                                       | 7.23865 | up | 4.19700  | up | 42.75609    | 6.11608    | 31.04437   | 6.52243    | Detected | Compromised | Detected    | Compromised |
| 621 | A_23_P326931  | TTC18      | Hs.591367 | tetratricopeptide repeat domain 18                                                                                                                       | Homo sapiens tetratricopeptide repeat domain 18 (TTC18), mRNA [NM_145170]                                                                                                                        | 7.21864 | up | 8.33507  | up | 170.29208   | 24.42710   | 139.43523  | 14.75125   | Detected | Detected    | Detected    | Compromised |
| 622 | A_33_P3324206 | HR         | Hs.272367 | hairless homolog (mouse)                                                                                                                                 | Homo sapiens hairless homolog (mouse) (HR), transcript variant 1, mRNA [NM_005144]                                                                                                               | 7.19136 | up | 6.37325  | up | 2981.85030  | 429.34644  | 2543.22390 | 351.87555  | Detected | Detected    | Detected    | Detected    |
| 623 | A_33_P3228355 | ERV3       | Hs.250693 | endogenous retroviral sequence 3 (includes zinc finger protein H-plk/HPF9)                                                                               | Homo sapiens endogenous retroviral sequence 3 (includes zinc finger protein H-plk/HPF9) (ERV3), mRNA [NM_001007253]                                                                              | 7.17834 | up | 7.97668  | up | 91.80429    | 13.24257   | 110.73068  | 12.24084   | Detected | Compromised | Detected    | Compromised |
| 624 | A_23_P79496   | GTF2A1L    | Hs.44385  | general transcription factor IIA, 1-like                                                                                                                 | Homo sapiens general transcription factor IIA, 1-like (GTF2A1L), transcript variant 2, mRNA [NM_172196]                                                                                          | 7.16416 | up | 6.33186  | up | 62.05046    | 8.96835    | 48.18505   | 6.71037    | Detected | Compromised | Detected    | Compromised |
| 625 | A_32_P146113  | C6orf81    | Hs.533066 | chromosome 6 open reading frame 81                                                                                                                       | Homo sapiens chromosome 6 open reading frame 81 (C6orf81), mRNA [NM_145028]                                                                                                                      | 7.16002 | up | 8.89184  | up | 70.83432    | 10.24383   | 61.30997   | 6.08002    | Detected | Compromised | Detected    | Compromised |
| 626 | A_23_P254863  | MGC42105   | Hs.25845  | serine/threonine-protein kinase NIM1                                                                                                                     | Homo sapiens serine/threonine-protein kinase NIM1 (MGC42105), mRNA [NM_153361]                                                                                                                   | 7.15758 | up | 6.56844  | up | 385.26578   | 55.73489   | 400.35233  | 53.74591   | Detected | Detected    | Detected    | Detected    |
| 627 | A_23_P158318  | ROR2       | Hs.98255  | receptor tyrosine kinase-like orphan receptor 2                                                                                                          | Homo sapiens receptor tyrosine kinase-like orphan receptor 2 (ROR2), mRNA [NM_004560]                                                                                                            | 7.14728 | up | 6.64486  | up | 773.56506   | 112.07002  | 751.34485  | 99.70541   | Detected | Detected    | Detected    | Detected    |
| 628 | A_32_P220750  | PLGLB1     | Hs.652174 | plasminogen-like B1                                                                                                                                      | Homo sapiens plasminogen-like B1 (PLGLB1), mRNA [NM_001032392]                                                                                                                                   | 7.10435 | up | 1.91861  | up | 31.64338    | 4.61202    | 19.40338   | 8.91777    | Detected | Compromised | Detected    | Compromised |
| 629 | A_24_P341674  | DIO2       | Hs.202354 | deiodinase, iodothyronine, type II                                                                                                                       | Homo sapiens deiodinase, iodothyronine, type II (DIO2), transcript variant 1, mRNA [NM_013989]                                                                                                   | 7.09681 | up | 17.33626 | up | 72.66090    | 10.60158   | 68.62457   | 3.49052    | Detected | Compromised | Detected    | Compromised |
| 630 | A_32_P196263  | ADAMTS9    | Hs.656071 | ADAM metalloproteinase with thrombospondin type 1 motif, 9                                                                                               | Homo sapiens ADAM metalloproteinase with thrombospondin type 1 motif, 9 (ADAMTS9), mRNA [NM_182920]                                                                                              | 7.08794 | up | 10.90263 | up | 202.86755   | 29.63640   | 131.94072  | 10.67120   | Detected | Detected    | Detected    | Compromised |
| 631 | A_33_P3245243 |            |           |                                                                                                                                                          |                                                                                                                                                                                                  | 7.08375 | up | 2.60300  | up | 335.86508   | 49.09472   | 39.47469   | 13.37244   | Detected | Detected    | Detected    | Compromised |
| 632 | A_23_P167818  | FAM184A    | Hs.443789 | family with sequence similarity 184, member A                                                                                                            | Homo sapiens family with sequence similarity 184, member A (FAM184A), transcript variant 1, mRNA [NM_024581]                                                                                     | 7.07978 | up | 8.28033  | up | 108.42570   | 15.85789   | 99.45076   | 10.59073   | Detected | Detected    | Detected    | Compromised |
| 633 | A_23_P113034  | C10orf11   | Hs.118161 | chromosome 10 open reading frame 11                                                                                                                      | Homo sapiens chromosome 10 open reading frame 11 (C10orf11), mRNA [NM_032024]                                                                                                                    | 7.07885 | up | 6.37025  | up | 42.39873    | 6.20188    | 36.82369   | 5.09725    | Detected | Compromised | Detected    | Compromised |
| 634 | A_33_P3290089 |            |           |                                                                                                                                                          |                                                                                                                                                                                                  | 7.07459 | up | 5.14633  | up | 282.89093   | 41.40481   | 195.78583  | 33.54662   | Detected | Detected    | Detected    | Detected    |
| 635 | A_32_P104432  | NORNA00087 | Hs.656427 | non-protein coding RNA 87                                                                                                                                | Homo sapiens non-protein coding RNA 87 (NORNA00087), non-coding RNA [NR_024493]                                                                                                                  | 7.05366 | up | 7.35662  | up | 1827.52110  | 268.27536  | 1177.58340 | 141.14928  | Detected | Detected    | Detected    | Detected    |
| 636 | A_33_P3389658 | PDE4D      | Hs.117545 | phosphodiesterase 4D, cAMP-specific (phosphodiesterase E3 dunce homolog, Drosophila)                                                                     | Homo sapiens phosphodiesterase 4D, cAMP-specific (phosphodiesterase E3 dunce homolog, Drosophila) (PDE4D), transcript variant 3, mRNA [NM_001165899]                                             | 7.03810 | up | 3.95760  | up | 45.17578    | 6.64635    | 58.90025   | 13.12352   | Detected | Compromised | Detected    | Compromised |
| 637 | A_33_P3289227 | DNAL1      | Hs.406050 | dynein, axonemal, light intermediate chain 1                                                                                                             | Homo sapiens dynein, axonemal, light intermediate chain 1 (DNAL1), mRNA [NM_003462]                                                                                                              | 7.03807 | up | 6.60107  | up | 762.18000   | 112.13401  | 532.49790  | 71.13265   | Detected | Detected    | Detected    | Detected    |
| 638 | A_23_P383009  | IGFBP5     | Hs.607212 | insulin-like growth factor binding protein 5                                                                                                             | Homo sapiens insulin-like growth factor binding protein 5 (IGFBP5), mRNA [NM_000599]                                                                                                             | 7.03738 | up | 8.91316  | up | 131.08830   | 19.28795   | 80.21664   | 7.93594    | Detected | Detected    | Detected    | Compromised |
| 639 | A_33_P3364062 | FLJ31356   | Hs.562870 | hypothetical protein FLJ31356                                                                                                                            | Homo sapiens cDNA FLJ31356 fis, clone MESAN2000337 [AK055918]                                                                                                                                    | 7.03553 | up | 5.18600  | up | 22.31790    | 3.28466    | 16.45729   | 2.79828    | Detected | Compromised | Detected    | Compromised |

|     |               |               |           |                                                            |                                                                                                                        |         |    |          |    |             |            |             |            |          |             |             |             |
|-----|---------------|---------------|-----------|------------------------------------------------------------|------------------------------------------------------------------------------------------------------------------------|---------|----|----------|----|-------------|------------|-------------|------------|----------|-------------|-------------|-------------|
| 640 | A_23_P66011   | NECAB2        | Hs.140950 | N-terminal EF-hand calcium binding protein 2               | Homo sapiens N-terminal EF-hand calcium binding protein 2 (NECAB2), mRNA [NM_019065]                                   | 7.03538 | up | 6.61375  | up | 20.81387    | 3.06336    | 19.02355    | 2.53635    | Detected | Compromised | Detected    | Compromised |
| 641 | A_23_P6066    | CPXM1         | Hs.659346 | carboxypeptidase X (M14 family), member 1                  | Homo sapiens carboxypeptidase X (M14 family), member 1 (CPXM1), mRNA [NM_019609]                                       | 7.01986 | up | 11.32421 | up | 208.82698   | 30.80286   | 215.79158   | 16.80320   | Detected | Detected    | Detected    | Detected    |
| 642 | A_23_P21485   | PID1          | Hs.715695 | phosphotyrosine interaction domain containing 1            | Homo sapiens phosphotyrosine interaction domain containing 1 (PID1), transcript variant 1, mRNA [NM_017933]            | 7.01960 | up | 7.43536  | up | 15322.27800 | 2260.18530 | 12243.05300 | 1451.95530 | Detected | Detected    | Detected    | Detected    |
| 643 | A_33_P3258617 |               |           |                                                            | Adipophilin (Adipose differentiation-related protein)(ADRP) [Source:UniProtKB/Swiss-Prot;Acc:Q99541] [ENST00000380464] | 7.00668 | up | 7.87524  | up | 2671.99440  | 394.87200  | 2063.65530  | 231.06764  | Detected | Detected    | Detected    | Detected    |
| 644 | A_33_P3377364 | ITGB4         | Hs.632226 | integrin, beta 4                                           | Homo sapiens integrin, beta 4 (ITGB4), transcript variant 1, mRNA [NM_000213]                                          | 6.99413 | up | 5.76255  | up | 408.56836   | 60.48727   | 481.80383   | 73.72607   | Detected | Detected    | Detected    | Detected    |
| 645 | A_32_P2392    | GOLGA8A       | Hs.720151 | golgi autoantigen, golgin subfamily a, 8A                  | Homo sapiens golgi autoantigen, golgin subfamily a, 8A (GOLGA8A), transcript variant 1, mRNA [NM_181077]               | 6.99208 | up | 8.75336  | up | 467.74530   | 69.26858   | 314.52844   | 31.68479   | Detected | Detected    | Detected    | Detected    |
| 646 | A_24_P626850  | H6PD          | Hs.463511 | hexose-6-phosphate dehydrogenase (glucose 1-dehydrogenase) | Homo sapiens hexose-6-phosphate dehydrogenase (glucose 1-dehydrogenase) (H6PD), mRNA [NM_004285]                       | 6.98240 | up | 7.64687  | up | 606.41656   | 89.92889   | 516.40515   | 59.54870   | Detected | Detected    | Detected    | Detected    |
| 647 | A_33_P3418716 | EFHD1         | Hs.516769 | EF-hand domain family, member D1                           | Homo sapiens EF-hand domain family, member D1 (EFHD1), transcript variant 1, mRNA [NM_025202]                          | 6.97931 | up | 7.59319  | up | 106.44068   | 15.79168   | 135.26530   | 15.70824   | Detected | Compromised | Detected    | Detected    |
| 648 | A_33_P3251522 | LVRN          | Hs.98288  | laeverin                                                   | Homo sapiens laeverin (LVRN), mRNA [NM_173800]                                                                         | 6.96637 | up | 6.79072  | up | 122.62955   | 18.22728   | 105.04511   | 13.64034   | Detected | Detected    | Detected    | Compromised |
| 649 | A_24_P329795  | C10orf10      | Hs.93675  | chromosome 10 open reading frame 10                        | Homo sapiens chromosome 10 open reading frame 10 (C10orf10), mRNA [NM_007021]                                          | 6.94372 | up | 6.63648  | up | 11099.41600 | 1655.16410 | 5629.94530  | 748.05273  | Detected | Detected    | Detected    | Detected    |
| 650 | A_23_P405110  | CDC14A        | Hs.127411 | CDC14 cell division cycle 14 homolog A (S. cerevisiae)     | Homo sapiens CDC14 cell division cycle 14 homolog A (S. cerevisiae) (CDC14A), transcript variant 3, mRNA [NM_033313]   | 6.94362 | up | 1.43120  | up | 19.97107    | 2.97816    | 3.97670     | 2.45014    | Detected | Compromised | Compromised | Compromised |
| 651 | A_33_P3388651 | ABLIM1        | Hs.438236 | actin binding LIM protein 1                                | Homo sapiens actin binding LIM protein 1 (ABLIM1), transcript variant 3, mRNA [NM_001003408]                           | 6.93236 | up | 11.04492 | up | 85.66856    | 12.79598   | 40.75651    | 3.25387    | Detected | Compromised | Detected    | Compromised |
| 652 | A_33_P3352382 | ARG1          | Hs.440934 | arginase, liver                                            | Homo sapiens arginase, liver (ARG1), mRNA [NM_000045]                                                                  | 6.89363 | up | 4.57451  | up | 24.63676    | 3.70057    | 16.70089    | 3.21929    | Detected | Compromised | Detected    | Compromised |
| 653 | A_23_P206733  | CES1          | Hs.558865 | carboxylesterase 1 (monocyte/macrophage serine esterase 1) | Homo sapiens carboxylesterase 1 (monocyte/macrophage serine esterase 1) (CES1), transcript variant 3, mRNA [NM_001266] | 6.87506 | up | 8.08715  | up | 3190.61300  | 480.54108  | 3727.48050  | 406.42984  | Detected | Detected    | Detected    | Detected    |
| 654 | A_33_P3293858 | MTUS2         | Hs.22287  | microtubule associated tumor suppressor candidate 2        | Homo sapiens microtubule associated tumor suppressor candidate 2 (MTUS2), transcript variant 1, mRNA [NM_001033602]    | 6.87124 | up | 6.26198  | up | 30.03388    | 4.52594    | 22.33073    | 3.14454    | Detected | Compromised | Detected    | Compromised |
| 655 | A_33_P3276703 | VGF           | Hs.587325 | VGF nerve growth factor inducible                          | Homo sapiens VGF nerve growth factor inducible (VGF), mRNA [NM_003378]                                                 | 6.86888 | up | 6.74450  | up | 5413.69900  | 816.09600  | 4037.55500  | 527.87900  | Detected | Detected    | Detected    | Detected    |
| 656 | A_23_P28834   | PHACTR3       | Hs.473218 | phosphatase and actin regulator 3                          | Homo sapiens phosphatase and actin regulator 3 (PHACTR3), transcript variant 1, mRNA [NM_080672]                       | 6.85968 | up | 4.96664  | up | 21.47659    | 3.24186    | 15.20828    | 2.70012    | Detected | Compromised | Detected    | Compromised |
| 657 | A_23_P46482   | IL20          | Hs.272373 | interleukin 20                                             | Homo sapiens interleukin 20 (IL20), mRNA [NM_018724]                                                                   | 6.85233 | up | 3.99505  | up | 25.90193    | 3.91406    | 18.29435    | 4.03794    | Detected | Compromised | Detected    | Compromised |
| 658 | A_33_P3328375 | TTC29         | Hs.378893 | tetratricopeptide repeat domain 29                         | Homo sapiens tetratricopeptide repeat domain 29 (TTC29), mRNA [NM_031956]                                              | 6.85105 | up | 2.38646  | up | 21.15531    | 3.19739    | 19.45469    | 7.18845    | Detected | Compromised | Detected    | Compromised |
| 659 | A_23_P79488   | STON1-GTF2A1L | Hs.44385  | STON1-GTF2A1L readthrough transcript                       | Homo sapiens STON1-GTF2A1L readthrough transcript (STON1-GTF2A1L), mRNA [NM_172311]                                    | 6.83954 | up | 6.63232  | up | 854.30500   | 129.33589  | 678.98060   | 90.27293   | Detected | Detected    | Detected    | Detected    |
| 660 | A_33_P3309075 | TBC1D8        | Hs.442657 | TBC1 domain family, member 8 (with GRAM domain)            | Homo sapiens TBC1 domain family, member 8 (with GRAM domain) (TBC1D8), mRNA [NM_001102426]                             | 6.83868 | up | 6.44097  | up | 7926.22560  | 1200.12710 | 7572.35400  | 1036.68180 | Detected | Detected    | Detected    | Detected    |
| 661 | A_33_P3421923 | CADM3         | Hs.365689 | cell adhesion molecule 3                                   | Homo sapiens cell adhesion molecule 3 (CADM3), transcript variant 1, mRNA [NM_021189]                                  | 6.83582 | up | 12.03720 | up | 65.71242    | 9.95383    | 92.42572    | 6.77069    | Detected | Compromised | Detected    | Compromised |
| 662 | A_23_P133712  | CYP39A1       | Hs.387367 | cytochrome P450, family 39, subfamily A, polypeptide 1     | Homo sapiens cytochrome P450, family 39, subfamily A, polypeptide 1 (CYP39A1), mRNA [NM_016593]                        | 6.82391 | up | 7.90140  | up | 21.64694    | 3.28470    | 24.61440    | 2.74695    | Detected | Compromised | Detected    | Compromised |
| 663 | A_23_P207245  | TEKT3         | Hs.414648 | tektin 3                                                   | Homo sapiens tektin 3 (TEKT3), mRNA [NM_031896]                                                                        | 6.80932 | up | 1.98950  | up | 20.63918    | 3.13850    | 17.57672    | 7.79037    | Detected | Compromised | Detected    | Compromised |
| 664 | A_33_P3348086 |               |           |                                                            |                                                                                                                        | 6.80800 | up | 2.31116  | up | 21.88845    | 3.32912    | 12.97779    | 4.95149    | Detected | Compromised | Compromised | Compromised |
| 665 | A_23_P96590   | GPRASP1       | Hs.710048 | G protein-coupled receptor associated sorting protein 1    | Homo sapiens G protein-coupled receptor associated sorting protein 1 (GPRASP1), transcript variant 1, mRNA [NM_014710] | 6.80673 | up | 12.58670 | up | 1086.01300  | 165.20740  | 647.91840   | 45.39145   | Detected | Detected    | Detected    | Detected    |
| 666 | A_23_P208302  | APOC2         | Hs.75615  | apolipoprotein C-II                                        | Homo sapiens apolipoprotein C-II (APOC2), mRNA [NM_000483]                                                             | 6.80348 | up | 6.86199  | up | 43.14624    | 6.56667    | 38.91995    | 5.00136    | Detected | Compromised | Detected    | Compromised |
| 667 | A_23_P434398  | TXLNB         | Hs.535820 | taxilin beta                                               | Homo sapiens taxilin beta (TXLNB), mRNA [NM_153235]                                                                    | 6.80140 | up | 5.89683  | up | 27.23257    | 4.14595    | 16.71405    | 2.49936    | Detected | Compromised | Detected    | Compromised |
| 668 | A_23_P201551  | VAV3          | Hs.267659 | vav 3 guanine nucleotide exchange factor                   | Homo sapiens vav 3 guanine nucleotide exchange factor (VAV3), transcript variant 1, mRNA [NM_006113]                   | 6.79582 | up | 7.11222  | up | 1982.75660  | 302.10712  | 1764.24340  | 218.73529  | Detected | Detected    | Detected    | Detected    |
| 669 | A_23_P71530   | TNFRSF11B     | Hs.81791  | tumor necrosis factor receptor superfamily, member 11b     | Homo sapiens tumor necrosis factor receptor superfamily, member 11b (TNFRSF11B), mRNA [NM_002546]                      | 6.79450 | up | 6.28911  | up | 826.93080   | 126.02147  | 664.49290   | 93.16795   | Detected | Detected    | Detected    | Detected    |

|     |               |              |           |                                                           |                                                                                                                                                         |         |    |          |    |             |            |             |            |          |             |             |             |
|-----|---------------|--------------|-----------|-----------------------------------------------------------|---------------------------------------------------------------------------------------------------------------------------------------------------------|---------|----|----------|----|-------------|------------|-------------|------------|----------|-------------|-------------|-------------|
| 670 | A_32_P70315   | TIMP4        | Hs.591665 | TIMP metalloproteinase inhibitor 4                        | Homo sapiens TIMP metalloproteinase inhibitor 4 (TIMP4), mRNA [NM_003256]                                                                               | 6.79088 | up | 6.53749  | up | 1974.25680  | 301.03085  | 1567.95130  | 211.48856  | Detected | Detected    | Detected    | Detected    |
| 671 | A_33_P3423949 | CBX2         | Hs.368410 | chromobox homolog 2 (Pc class homolog, Drosophila)        | Homo sapiens chromobox homolog 2 (Pc class homolog, Drosophila) (CBX2), transcript variant 1, mRNA [NM_005183]                                          | 6.77804 | up | 5.82936  | up | 2502.97920  | 382.37213  | 1845.42590  | 279.15244  | Detected | Detected    | Detected    | Detected    |
| 672 | A_23_P364444  |              |           |                                                           |                                                                                                                                                         | 6.77780 | up | 1.73782  | up | 41.99950    | 6.41635    | 6.09994     | 3.09518    | Detected | Compromised | Compromised | Compromised |
| 673 | A_33_P3861634 | LOC285084    | Hs.275398 | hypothetical protein LOC285084                            | Homo sapiens mRNA; cDNA DKFZ667G2020 (from clone DKFZ667G2020) [AL838646]                                                                               | 6.76070 | up | 6.33152  | up | 753.66976   | 115.43408  | 618.84350   | 86.18633   | Detected | Detected    | Detected    | Detected    |
| 674 | A_23_P101642  | PTPRH        | Hs.179770 | protein tyrosine phosphatase, receptor type, H            | Homo sapiens protein tyrosine phosphatase, receptor type, H (PTPRH), transcript variant 1, mRNA [NM_002842]                                             | 6.74886 | up | 25.70233 | up | 248.55237   | 38.13473   | 223.58888   | 7.67085    | Detected | Detected    | Detected    | Compromised |
| 675 | A_23_P130961  | ELANE        | Hs.99863  | elastase, neutrophil expressed                            | Homo sapiens elastase, neutrophil expressed (ELANE), mRNA [NM_001972]                                                                                   | 6.74519 | up | 62.67902 | up | 240.62944   | 36.93919   | 222.60243   | 3.13165    | Detected | Detected    | Detected    | Compromised |
| 676 | A_23_P69573   | GUCY1A3      | Hs.24258  | guanylate cyclase 1, soluble, alpha 3                     | Homo sapiens guanylate cyclase 1, soluble, alpha 3 (GUCY1A3), transcript variant 1, mRNA [NM_000856]                                                    | 6.73449 | up | 9.31997  | up | 135.01192   | 20.75672   | 107.33898   | 10.15567   | Detected | Detected    | Detected    | Compromised |
| 677 | A_23_P363968  | C1RL         | Hs.631730 | complement component 1, r subcomponent-like               | Homo sapiens complement component 1, r subcomponent-like (C1RL), mRNA [NM_016546]                                                                       | 6.72902 | up | 6.96225  | up | 1141.08900  | 175.59038  | 773.58350   | 97.97678   | Detected | Detected    | Detected    | Detected    |
| 678 | A_23_P377616  | CIRBP        | Hs.618145 | cold inducible RNA binding protein                        | Homo sapiens cold inducible RNA binding protein (CIRBP), transcript variant 2, transcribed RNA [NR_023312]                                              | 6.71722 | up | 5.21659  | up | 710.36460   | 109.50278  | 620.83110   | 104.94281  | Detected | Detected    | Detected    | Detected    |
| 679 | A_33_P3398316 | MMP27        | Hs.534479 | matrix metalloproteinase 27                               | Homo sapiens matrix metalloproteinase 27 (MMP27), mRNA [NM_022122]                                                                                      | 6.71506 | up | 3.04064  | up | 24.91867    | 3.84245    | 11.03678    | 3.20069    | Detected | Compromised | Compromised | Compromised |
| 680 | A_23_P381261  | ADCY4        | Hs.443428 | adenylate cyclase 4                                       | Homo sapiens adenylate cyclase 4 (ADCY4), mRNA [NM_139247]                                                                                              | 6.69895 | up | 6.83609  | up | 1069.82910  | 165.36392  | 1320.51610  | 170.33397  | Detected | Detected    | Detected    | Detected    |
| 681 | A_23_P107775  | TMEM190      | Hs.590943 | transmembrane protein 190                                 | Homo sapiens transmembrane protein 190 (TMEM190), mRNA [NM_139172]                                                                                      | 6.68831 | up | 7.93560  | up | 442.68550   | 68.53498   | 612.68620   | 68.08065   | Detected | Detected    | Detected    | Detected    |
| 682 | A_33_P3252588 | LOC100130093 |           | hypothetical LOC100130093                                 | Homo sapiens hypothetical LOC100130093 (LOC100130093), transcript variant 1, non-coding RNA [NR_024485]                                                 | 6.68445 | up | 4.53443  | up | 133.93530   | 20.74734   | 118.36622   | 23.01815   | Detected | Detected    | Detected    | Detected    |
| 683 | A_33_P3399208 |              | Hs.77961  |                                                           | HLA class I histocompatibility antigen, B-18 alpha chain Precursor (MHC class I antigen B*18) [Source:UniProtKB/Swiss-Prot;Acc:P0466] [ENST00000359635] | 6.64752 | up | 5.50218  | up | 13922.18100 | 2168.60550 | 17484.75600 | 2802.14580 | Detected | Detected    | Detected    | Detected    |
| 684 | A_33_P3883985 | LOC650392    | Hs.371980 | hypothetical protein LOC650392                            | Homo sapiens cDNA clone IMAGE526470 [BC036550]                                                                                                          | 6.64218 | up | 6.32226  | up | 1250.59240  | 194.95682  | 1196.47230  | 166.87672  | Detected | Detected    | Detected    | Detected    |
| 685 | A_23_P306215  | FAM84A       | Hs.260855 | family with sequence similarity 84, member A              | Homo sapiens family with sequence similarity 84, member A (FAM84A), mRNA [NM_145175]                                                                    | 6.63029 | up | 8.32427  | up | 299.84778   | 46.82756   | 279.87286   | 29.64694   | Detected | Detected    | Detected    | Detected    |
| 686 | A_23_P167585  | GDF9         | Hs.25022  | growth differentiation factor 9                           | Homo sapiens growth differentiation factor 9 (GDF9), mRNA [NM_005260]                                                                                   | 6.62429 | up | 6.33227  | up | 22.61592    | 3.53515    | 21.61738    | 3.01030    | Detected | Compromised | Detected    | Compromised |
| 687 | A_23_P114903  | HSPA6        | Hs.654614 | heat shock 70kDa protein 6 (HSP70B)                       | Homo sapiens heat shock 70kDa protein 6 (HSP70B) (HSPA6), mRNA [NM_002155]                                                                              | 6.61456 | up | 9.22900  | up | 404.18704   | 63.27242   | 459.65482   | 43.91800   | Detected | Detected    | Detected    | Detected    |
| 688 | A_33_P3243500 | LOC728650    | Hs.696467 | hypothetical LOC728650                                    | PREDICTED: Homo sapiens hypothetical LOC728650 (LOC728650), mRNA [XM_002343155]                                                                         | 6.60753 | up | 12.18407 | up | 160.91562   | 25.21694   | 196.54771   | 14.22463   | Detected | Detected    | Detected    | Detected    |
| 689 | A_23_P93658   | ACCN3        | Hs.647113 | amiloride-sensitive cation channel 3                      | Homo sapiens amiloride-sensitive cation channel 3 (ACCN3), transcript variant 3, mRNA [NM_020322]                                                       | 6.59570 | up | 7.18133  | up | 59.50608    | 9.34186    | 54.43339    | 6.68384    | Detected | Compromised | Detected    | Compromised |
| 690 | A_23_P425681  | CCK          | Hs.458426 | cholecystokinin                                           | Homo sapiens cholecystokinin (CCK), mRNA [NM_000729]                                                                                                    | 6.59245 | up | 7.24848  | up | 3663.55200  | 575.42450  | 2321.33400  | 282.39432  | Detected | Detected    | Detected    | Detected    |
| 691 | A_24_P169386  | C2orf84      | Hs.467868 | chromosome 2 open reading frame 84                        | Homo sapiens chromosome 2 open reading frame 84 (C2orf84), mRNA [NM_001040710]                                                                          | 6.59107 | up | 5.32051  | up | 99.06247    | 15.56276   | 76.50373    | 12.67929   | Detected | Compromised | Detected    | Compromised |
| 692 | A_23_P157007  | TMEM176B     | Hs.647090 | transmembrane protein 176B                                | Homo sapiens transmembrane protein 176B (TMEM176B), transcript variant 1, mRNA [NM_014020]                                                              | 6.58039 | up | 22.98909 | up | 234.20009   | 36.85263   | 218.94563   | 8.39808    | Detected | Detected    | Detected    | Compromised |
| 693 | A_33_P3313779 | CCDC64       | Hs.369763 | coiled-coil domain containing 64                          | Homo sapiens coiled-coil domain containing 64 (CCDC64), mRNA [NM_207311]                                                                                | 6.57217 | up | 2.42958  | up | 36.16052    | 5.69717    | 22.14104    | 8.03587    | Detected | Compromised | Detected    | Compromised |
| 694 | A_33_P3261054 | CCDC114      | Hs.112645 | coiled-coil domain containing 114                         | Homo sapiens coiled-coil domain containing 114 (CCDC114), transcript variant 2, mRNA [NM_144577]                                                        | 6.56411 | up | 6.69359  | up | 37.90872    | 5.97994    | 34.55167    | 4.55172    | Detected | Compromised | Detected    | Compromised |
| 695 | A_24_P406060  | RNF144B      | Hs.148741 | ring finger protein 144B                                  | Homo sapiens ring finger protein 144B (RNF144B), mRNA [NM_182757]                                                                                       | 6.56194 | up | 5.94384  | up | 240.10771   | 37.88845   | 170.62404   | 25.31272   | Detected | Detected    | Detected    | Detected    |
| 696 | A_33_P3413815 | LAMB2L       |           | laminin, beta 2-like                                      | Homo sapiens laminin, beta 2-like (LAMB2L), non-coding RNA [NR_004405]                                                                                  | 6.55874 | up | 5.93132  | up | 815.41060   | 128.73285  | 530.09143   | 78.80706   | Detected | Detected    | Detected    | Detected    |
| 697 | A_33_P3316278 | ABCC6P1      | Hs.13188  | ATP-binding cassette, sub-family C, member 6 pseudogene 1 | Homo sapiens ATP-binding cassette, sub-family C, member 6 pseudogene 1 (ABCC6P1), non-coding RNA [NR_003569]                                            | 6.55542 | up | 2.31262  | up | 19.72365    | 3.11544    | 9.61065     | 3.66449    | Detected | Compromised | Compromised | Compromised |
| 698 | A_23_P155596  | FMO3         | Hs.445350 | flavin containing monooxygenase 3                         | Homo sapiens flavin containing monooxygenase 3 (FMO3), transcript variant 2, mRNA [NM_001002294]                                                        | 6.55514 | up | 7.00396  | up | 22.59917    | 3.56980    | 23.85950    | 3.00388    | Detected | Compromised | Detected    | Compromised |
| 699 | A_23_P387585  | CXorf50      | Hs.676982 | chromosome X open reading frame 50                        | Homo sapiens chromosome X open reading frame 50 (CXorf50), non-coding RNA [NR_026595]                                                                   | 6.55148 | up | 3.78072  | up | 20.15196    | 3.18501    | 13.70104    | 3.19554    | Detected | Compromised | Detected    | Compromised |
| 700 | A_33_P3380762 | LOC729467    |           | hypothetical LOC729467                                    | Homo sapiens hypothetical LOC729467 (LOC729467), non-coding RNA [NR_027120]                                                                             | 6.54469 | up | 3.06005  | up | 80.16272    | 12.68284   | 72.74611    | 20.96267   | Detected | Compromised | Detected    | Detected    |

|     |               |           |           |                                                                                                        |                                                                                                                                                                       |         |    |          |             |             |             |            |          |             |             |             |
|-----|---------------|-----------|-----------|--------------------------------------------------------------------------------------------------------|-----------------------------------------------------------------------------------------------------------------------------------------------------------------------|---------|----|----------|-------------|-------------|-------------|------------|----------|-------------|-------------|-------------|
| 701 | A_23_P73632   | NROB1     | Hs.268490 | nuclear receptor subfamily 0, group B, member 1                                                        | Homo sapiens nuclear receptor subfamily 0, group B, member 1 (NROB1), mRNA [NM_000475]                                                                                | 6.53813 | up | 6.99447  | 257.53506   | 40.78642    | 306.05145   | 38.58382   | Detected | Detected    | Detected    | Detected    |
| 702 | A_23_P218646  | TNFRSF6B  | Hs.434878 | tumor necrosis factor receptor superfamily, member 6b, decoy                                           | Homo sapiens tumor necrosis factor receptor superfamily, member 6b, decoy (TNFRSF6B), transcript variant M59C, mRNA [NM_032945]                                       | 6.53570 | up | 6.26144  | 3738.91600  | 592.36180   | 4989.08060  | 702.60580  | Detected | Detected    | Detected    | Detected    |
| 703 | A_32_P131143  | CECR4     |           | cat eye syndrome chromosome region, candidate 4 (non-protein coding)                                   | Homo sapiens cat eye syndrome chromosome region, candidate 4 (non-protein coding) (CECR4), transcript variant 2, non-coding RNA [NR_024482]                           | 6.53170 | up | 6.50357  | 177.56955   | 28.14981    | 201.00829   | 27.25383   | Detected | Detected    | Detected    | Detected    |
| 704 | A_33_P3305571 | TNFRSF6B  | Hs.434878 | tumor necrosis factor receptor superfamily, member 6b, decoy                                           | Homo sapiens tumor necrosis factor receptor superfamily, member 6b, decoy (TNFRSF6B), transcript variant M59C, mRNA [NM_032945]                                       | 6.52663 | up | 5.86240  | 1209.04930  | 191.81737   | 1358.43620  | 204.32875  | Detected | Detected    | Detected    | Detected    |
| 705 | A_23_P2492    | C1S       | Hs.458355 | complement component 1, s subcomponent                                                                 | Homo sapiens complement component 1, s subcomponent (C1S), transcript variant 2, mRNA [NM_001734]                                                                     | 6.52277 | up | 5.85421  | 99613.09000 | 15813.12000 | 66059.58600 | 9950.22800 | Detected | Detected    | Detected    | Detected    |
| 706 | A_23_P129425  | TSNAXIP1  | Hs.632212 | translin-associated factor X interacting protein 1                                                     | Homo sapiens translin-associated factor X interacting protein 1 (TSNAXIP1), mRNA [NM_018430]                                                                          | 6.51881 | up | 3.96706  | 134.33679   | 21.33831    | 129.42801   | 28.76905   | Detected | Detected    | Detected    | Detected    |
| 707 | A_32_P58614   | KIAA1377  | Hs.156352 | KIAA1377                                                                                               | Homo sapiens KIAA1377 (KIAA1377), mRNA [NM_020802]                                                                                                                    | 6.50835 | up | 13.55465 | 128.32167   | 20.41560    | 48.60483    | 3.16196    | Detected | Detected    | Detected    | Compromised |
| 708 | A_23_P313550  | SLC25A41  | Hs.375135 | solute carrier family 25, member 41                                                                    | Homo sapiens solute carrier family 25, member 41 (SLC25A41), mRNA [NM_173637]                                                                                         | 6.50589 | up | 8.84281  | 73.00770    | 11.61971    | 126.56374   | 12.62074   | Detected | Compromised | Detected    | Compromised |
| 709 | A_33_P3267948 | SLC25A23  | Hs.356231 | solute carrier family 25 (mitochondrial carrier; phosphate carrier), member 23                         | Homo sapiens solute carrier family 25 (mitochondrial carrier; phosphate carrier), member 23 (SLC25A23), nuclear gene encoding mitochondrial protein, mRNA [NM_024103] | 6.49325 | up | 6.92547  | 655.41860   | 104.51759   | 565.00635   | 71.93987   | Detected | Detected    | Detected    | Detected    |
| 710 | A_23_P140725  | IFT140    | Hs.389438 | intraflagellar transport 140 homolog (Chlamydomonas)                                                   | Homo sapiens intraflagellar transport 140 homolog (Chlamydomonas) (IFT140), mRNA [NM_014714]                                                                          | 6.47682 | up | 5.26228  | 516.51746   | 82.57649    | 486.54575   | 81.52964   | Detected | Detected    | Detected    | Detected    |
| 711 | A_33_P3377005 | C11orf35  | Hs.669395 | chromosome 11 open reading frame 35                                                                    | Homo sapiens chromosome 11 open reading frame 35 (C11orf35), mRNA [NM_178732]                                                                                         | 6.47675 | up | 6.59977  | 1069.36820  | 170.96336   | 860.87420   | 115.02079  | Detected | Detected    | Detected    | Detected    |
| 712 | A_32_P24372   | TBC1D3B   | Hs.454713 | TBC1 domain family, member 3B                                                                          | Homo sapiens TBC1 domain family, member 3B (TBC1D3B), mRNA [NM_001001417]                                                                                             | 6.47430 | up | 5.94574  | 217.75290   | 34.82607    | 40.65864    | 6.02993    | Detected | Detected    | Detected    | Compromised |
| 713 | A_33_P3319905 |           |           |                                                                                                        |                                                                                                                                                                       | 6.47366 | up | 14.48513 | 110.86892   | 17.70433    | 97.31604    | 5.92417    | Detected | Compromised | Detected    | Compromised |
| 714 | A_23_P106024  | JAG2      | Hs.433445 | jagged 2                                                                                               | Homo sapiens jagged 2 (JAG2), transcript variant 1, mRNA [NM_002226]                                                                                                  | 6.46737 | up | 5.96949  | 46.37534    | 7.42493     | 29.68383    | 4.38479    | Detected | Compromised | Detected    | Compromised |
| 715 | A_33_P3404601 | C2        | Hs.408903 | complement component 2                                                                                 | Homo sapiens complement component 2 (C2), transcript variant 1, mRNA [NM_000063]                                                                                      | 6.45326 | up | 5.29894  | 57.17582    | 9.17417     | 55.39499    | 9.21821    | Detected | Compromised | Detected    | Compromised |
| 716 | A_23_P39251   | PLIN5     | Hs.131034 | perilipin 5                                                                                            | Homo sapiens perilipin 5 (PLIN5), mRNA [NM_001013706]                                                                                                                 | 6.43596 | up | 5.08832  | 119.09570   | 19.16089    | 39.63485    | 6.86860    | Detected | Detected    | Detected    | Compromised |
| 717 | A_24_P135769  | VWA5A     | Hs.152944 | von Willebrand factor A domain containing 5A                                                           | Homo sapiens von Willebrand factor A domain containing 5A (VWA5A), transcript variant 2, mRNA [NM_198315]                                                             | 6.43411 | up | 7.54227  | 110.08601   | 17.71646    | 107.84480   | 12.60848   | Detected | Detected    | Detected    | Compromised |
| 718 | A_23_P100660  | SERPINF1  | Hs.532768 | serpin peptidase inhibitor, clade F (alpha-2 antiplasmin, pigment epithelium derived factor), member 1 | Homo sapiens serpin peptidase inhibitor, clade F (alpha-2 antiplasmin, pigment epithelium derived factor), member 1 (SERPINF1), mRNA [NM_002615]                      | 6.43110 | up | 6.04053  | 18300.59800 | 2946.54570  | 17098.51600 | 2496.02500 | Detected | Detected    | Detected    | Detected    |
| 719 | A_24_P160401  | CDCP1     | Hs.476093 | CUB domain containing protein 1                                                                        | Homo sapiens CUB domain containing protein 1 (CDCP1), transcript variant 2, mRNA [NM_178181]                                                                          | 6.41645 | up | 6.85149  | 366.74655   | 59.18397    | 279.56445   | 35.98012   | Detected | Detected    | Detected    | Detected    |
| 720 | A_33_P3210880 |           |           |                                                                                                        |                                                                                                                                                                       | 6.41551 | up | 3.40216  | 24.81117    | 4.00451     | 27.90160    | 7.23168    | Detected | Compromised | Detected    | Compromised |
| 721 | A_32_P86289   | CYP19A1   | Hs.260074 | cytochrome P450, family 19, subfamily A, polypeptide 1                                                 | Homo sapiens cytochrome P450, family 19, subfamily A, polypeptide 1 (CYP19A1), transcript variant 2, mRNA [NM_031226]                                                 | 6.41310 | up | 6.02797  | 25.81845    | 4.16865     | 20.56400    | 3.00817    | Detected | Compromised | Detected    | Compromised |
| 722 | A_32_P139738  | HERC2P4   | Hs.531536 | hect domain and RLD 2 pseudogene 4                                                                     | Homo sapiens hect domain and RLD 2 pseudogene 4 (HERC2P4), non-coding RNA [NR_002827]                                                                                 | 6.38919 | up | 2.83049  | 21.13700    | 3.42555     | 21.12554    | 6.58129    | Detected | Compromised | Detected    | Compromised |
| 723 | A_23_P73150   | TTC25     | Hs.201134 | tetratricopeptide repeat domain 25                                                                     | Homo sapiens tetratricopeptide repeat domain 25 (TTC25), mRNA [NM_031421]                                                                                             | 6.38510 | up | 6.50933  | 555.06696   | 90.01417    | 487.57605   | 66.04984   | Detected | Detected    | Detected    | Detected    |
| 724 | A_33_P3249976 | JAM2      | Hs.517227 | junctional adhesion molecule 2                                                                         | Homo sapiens junctional adhesion molecule 2 (JAM2), mRNA [NM_021219]                                                                                                  | 6.37976 | up | 6.32122  | 161.29411   | 26.17866    | 159.98735   | 22.31775   | Detected | Detected    | Detected    | Detected    |
| 725 | A_23_P107173  | MEOX1     | Hs.438    | mesenchyme homeobox 1                                                                                  | Homo sapiens mesenchyme homeobox 1 (MEOX1), transcript variant 1, mRNA [NM_004527]                                                                                    | 6.37756 | up | 6.81689  | 32.32433    | 5.24817     | 27.00598    | 3.49333    | Detected | Compromised | Detected    | Compromised |
| 726 | A_23_P62890   | GBP1      | Hs.62661  | guanylate binding protein 1, interferon-inducible, 67kDa                                               | Homo sapiens guanylate binding protein 1, interferon-inducible, 67kDa (GBP1), mRNA [NM_002053]                                                                        | 6.37617 | up | 6.14213  | 375.55002   | 60.98749    | 337.86630   | 48.50555   | Detected | Detected    | Detected    | Detected    |
| 727 | A_23_P155057  | CYTH4     | Hs.170944 | cytohesin 4                                                                                            | Homo sapiens cytohesin 4 (CYTH4), mRNA [NM_013385]                                                                                                                    | 6.37421 | up | 4.59795  | 72.78553    | 11.82366    | 85.37134    | 16.37245   | Detected | Compromised | Detected    | Compromised |
| 728 | A_23_P106371  | GOLGA6A   | Hs.546408 | golgi autoantigen, golgin subfamily a, 6A                                                              | Homo sapiens golgi autoantigen, golgin subfamily a, 6A (GOLGA6A), mRNA [NM_01038640]                                                                                  | 6.36758 | up | 6.81067  | 285.72748   | 46.46338    | 137.64340   | 17.82095   | Detected | Detected    | Detected    | Detected    |
| 729 | A_33_P3680462 | LOC339539 | Hs.434301 | hypothetical protein LOC339539                                                                         | Homo sapiens cDNA clone IMAGE:5170739 [BC043541]                                                                                                                      | 6.36703 | up | 2.50676  | 20.55779    | 3.34328     | 9.58752     | 3.37255    | Detected | Compromised | Compromised | Compromised |
| 730 | A_23_P121926  | SEPP1     | Hs.275775 | selenoprotein P, plasma, 1                                                                             | Homo sapiens selenoprotein P, plasma, 1 (SEPP1), transcript variant 1, mRNA [NM_005410]                                                                               | 6.35521 | up | 7.03898  | 2963.17580  | 482.79280   | 1896.74230  | 237.60953  | Detected | Detected    | Detected    | Detected    |



|     |               |              |           |                                                                             |                                                                                                                             |         |    |          |    |             |            |             |            |          |             |             |             |
|-----|---------------|--------------|-----------|-----------------------------------------------------------------------------|-----------------------------------------------------------------------------------------------------------------------------|---------|----|----------|----|-------------|------------|-------------|------------|----------|-------------|-------------|-------------|
| 731 | A_23_P212756  | GRK4         | Hs.32959  | G protein-coupled receptor kinase 4                                         | Homo sapiens G protein-coupled receptor kinase 4 (GRK4), transcript variant 3, mRNA [NM_001004057]                          | 6.33623 | up | 5.50155  | up | 164.35370   | 26.85849   | 160.58409   | 25.73848   | Detected | Detected    | Detected    | Detected    |
| 732 | A_23_P127781  | SCGB1D1      | Hs.202686 | secretoglobin, family 1D, member 1                                          | Homo sapiens secretoglobin, family 1D, member 1 (SCGB1D1), mRNA [NM_006552]                                                 | 6.33581 | up | 3.18241  | up | 23.60077    | 3.85707    | 12.36649    | 3.42654    | Detected | Compromised | Compromised | Compromised |
| 733 | A_23_P321223  | PMCH         | Hs.707990 | pro-melanin-concentrating hormone                                           | Homo sapiens pro-melanin-concentrating hormone (PMCH), mRNA [NM_026747]                                                     | 6.33402 | up | 1.98497  | up | 22.13522    | 3.61857    | 15.33052    | 6.81033    | Detected | Compromised | Detected    | Compromised |
| 734 | A_23_P412577  | ANKRD29      | Hs.374774 | ankyrin repeat domain 29                                                    | Homo sapiens ankyrin repeat domain 29 (ANKRD29), mRNA [NM_173505]                                                           | 6.32960 | up | 7.34835  | up | 1618.53710  | 264.77640  | 1342.29380  | 161.05120  | Detected | Detected    | Detected    | Detected    |
| 735 | A_23_P368681  | GIMAP2       | Hs.647071 | GTPase, IMAP family member 2                                                | Homo sapiens GTPase, IMAP family member 2 (GIMAP2), mRNA [NM_015690]                                                        | 6.32581 | up | 6.45963  | up | 20.67360    | 3.38402    | 20.88170    | 2.85052    | Detected | Compromised | Detected    | Compromised |
| 736 | A_24_P167654  | SLC8A3       | Hs.337696 | solute carrier family 8 (sodium/calcium exchanger), member 3                | Homo sapiens solute carrier family 8 (sodium/calcium exchanger), member 3 (SLC8A3), transcript variant c, mRNA [NM_183002]  | 6.31854 | up | 2.47439  | up | 20.04742    | 3.28530    | 21.81239    | 7.77320    | Detected | Compromised | Detected    | Compromised |
| 737 | A_33_P3241984 | PTPN22       | Hs.535276 | protein tyrosine phosphatase, non-receptor type 22 (lymphoid)               | Homo sapiens protein tyrosine phosphatase, non-receptor type 22 (lymphoid) (PTPN22), transcript variant 1, mRNA [NM_015967] | 6.31163 | up | 6.03207  | up | 944.46170   | 154.94449  | 555.36240   | 81.18499   | Detected | Detected    | Detected    | Detected    |
| 738 | A_33_P3407469 | MYH7B        | Hs.414122 | myosin, heavy chain 7B, cardiac muscle, beta                                | Homo sapiens myosin, heavy chain 7B, cardiac muscle, beta (MYH7B), mRNA [NM_020884]                                         | 6.30143 | up | 5.90513  | up | 150.09232   | 24.66338   | 149.09140   | 22.26326   | Detected | Detected    | Detected    | Detected    |
| 739 | A_24_P23921   | C17orf98     | Hs.250182 | chromosome 17 open reading frame 98                                         | Homo sapiens chromosome 17 open reading frame 98 (C17orf98), mRNA [NM_001080465]                                            | 6.29694 | up | 7.89319  | up | 25.02121    | 4.11445    | 33.07570    | 3.69507    | Detected | Compromised | Detected    | Compromised |
| 740 | A_23_P28466   | WDR69        | Hs.424594 | WD repeat domain 69                                                         | Homo sapiens WD repeat domain 69 (WDR69), mRNA [NM_178821]                                                                  | 6.29388 | up | 6.54712  | up | 436.32706   | 71.78383   | 418.93643   | 56.42390   | Detected | Detected    | Detected    | Detected    |
| 741 | A_23_P138352  | WNT2B        | Hs.258575 | wingless-type MMTV integration site family, member 2B                       | Homo sapiens wingless-type MMTV integration site family, member 2B (WNT2B), transcript variant WNT-2B1, mRNA [NM_004185]    | 6.28515 | up | 2.25923  | up | 20.87522    | 3.43913    | 14.80531    | 5.77860    | Detected | Compromised | Detected    | Compromised |
| 742 | A_24_P56330   | C13orf16     | Hs.210677 | chromosome 13 open reading frame 16                                         | Homo sapiens chromosome 13 open reading frame 16 (C13orf16), mRNA [NM_152324]                                               | 6.27958 | up | 11.59735 | up | 647.93164   | 106.83939  | 615.80820   | 46.82224   | Detected | Detected    | Detected    | Detected    |
| 743 | A_23_P145054  | FAM162B      | Hs.126712 | family with sequence similarity 162, member B                               | Homo sapiens family with sequence similarity 162, member B (FAM162B), mRNA [NM_001085480]                                   | 6.27587 | up | 6.84243  | up | 368.83080   | 60.85365   | 280.76584   | 36.18255   | Detected | Detected    | Detected    | Detected    |
| 744 | A_33_P3289386 | LOC100130168 | Hs.663697 | hypothetical protein LOC100130168                                           | Homo sapiens cDNA FLJ44638 fis, clone BRACE2027312, [AK128601]                                                              | 6.27449 | up | 7.40669  | up | 18.09130    | 2.98555    | 20.58281    | 2.45045    | Detected | Compromised | Detected    | Compromised |
| 745 | A_24_P142503  | SLC47A1      | Hs.232054 | solute carrier family 47, member 1                                          | Homo sapiens solute carrier family 47, member 1 (SLC47A1), mRNA [NM_018242]                                                 | 6.26584 | up | 12.37965 | up | 41.06432    | 6.78608    | 57.12029    | 4.06862    | Detected | Compromised | Detected    | Compromised |
| 746 | A_23_P37736   | TNFRSF17     | Hs.2556   | tumor necrosis factor receptor superfamily, member 17                       | Homo sapiens tumor necrosis factor receptor superfamily, member 17 (TNFRSF17), mRNA [NM_001192]                             | 6.25760 | up | 7.66126  | up | 62.76551    | 10.38595   | 42.85702    | 4.93273    | Detected | Compromised | Detected    | Compromised |
| 747 | A_33_P3220837 | MAFB         | Hs.169487 | v-maf musculoaponeurotic fibrosarcoma oncogene homolog B (avian)            | Homo sapiens v-maf musculoaponeurotic fibrosarcoma oncogene homolog B (avian) (MAFB), mRNA [NM_005461]                      | 6.25740 | up | 5.70261  | up | 22195.72300 | 3672.89500 | 14432.80700 | 2231.73660 | Detected | Detected    | Detected    | Detected    |
| 748 | A_24_P22050   | RAB20        | Hs.508720 | RAB20, member RAS oncogene family                                           | Homo sapiens RAB20, member RAS oncogene family (RAB20), mRNA [NM_017817]                                                    | 6.25273 | up | 4.82104  | up | 343.59024   | 56.89898   | 403.56980   | 73.81477   | Detected | Detected    | Detected    | Detected    |
| 749 | A_23_P385911  | KIAA1712     | Hs.555989 | KIAA1712                                                                    | Homo sapiens KIAA1712 (KIAA1712), transcript variant 2, mRNA [NM_001145314]                                                 | 6.24044 | up | 9.00689  | up | 38.86466    | 6.44871    | 30.01562    | 2.93858    | Detected | Compromised | Detected    | Compromised |
| 750 | A_33_P3252068 | JHDM1D       | Hs.308710 | jumonji C domain containing histone demethylase 1 homolog D (S. cerevisiae) | Homo sapiens jumonji C domain containing histone demethylase 1 homolog D (S. cerevisiae) (JHDM1D), mRNA [NM_030647]         | 6.24002 | up | 2.94227  | up | 18.57213    | 3.08183    | 27.59835    | 8.27115    | Detected | Compromised | Detected    | Compromised |
| 751 | A_33_P3269803 | CLSTN3       | Hs.535378 | calsynenin 3                                                                | Homo sapiens calsynenin 3 (CLSTN3), mRNA [NM_014718]                                                                        | 6.23633 | up | 4.04409  | up | 3730.11550  | 619.33580  | 4428.73100  | 965.65900  | Detected | Detected    | Detected    | Detected    |
| 752 | A_24_P39195   | OXGR1        | Hs.352218 | oxoglutarate (alpha-ketoglutarate) receptor 1                               | Homo sapiens oxoglutarate (alpha-ketoglutarate) receptor 1 (OXGR1), mRNA [NM_080818]                                        | 6.23139 | up | 3.43382  | up | 23.95931    | 3.98128    | 15.46829    | 3.97219    | Detected | Compromised | Compromised | Compromised |
| 753 | A_33_P3412468 | SLC25A27     | Hs.40510  | solute carrier family 25, member 27                                         | Homo sapiens solute carrier family 25, member 27 (SLC25A27), nuclear gene encoding mitochondrial protein, mRNA [NM_004277]  | 6.22980 | up | 6.04627  | up | 1077.63880  | 179.11522  | 857.74146   | 125.09339  | Detected | Detected    | Detected    | Detected    |
| 754 | A_23_P409623  | PPFIBP2      | Hs.655714 | PTPRF interacting protein, binding protein 2 (liprin beta 2)                | Homo sapiens PTPRF interacting protein, binding protein 2 (liprin beta 2) (PPFIBP2), mRNA [NM_003621]                       | 6.21911 | up | 5.65902  | up | 1399.33460  | 232.98431  | 982.64984   | 153.11699  | Detected | Detected    | Detected    | Detected    |
| 755 | A_32_P205624  | SHC2         | Hs.30965  | SHC (Src homology 2 domain containing) transforming protein 2               | Homo sapiens SHC (Src homology 2 domain containing) transforming protein 2 (SHC2), mRNA [NM_012435]                         | 6.21733 | up | 11.32253 | up | 135.27054   | 22.52849   | 158.03465   | 12.30763   | Detected | Detected    | Detected    | Compromised |
| 756 | A_23_P133359  | ZFP2         | Hs.654533 | zinc finger protein 2 homolog (mouse)                                       | Homo sapiens zinc finger protein 2 homolog (mouse) (ZFP2), mRNA [NM_030613]                                                 | 6.21660 | up | 8.04942  | up | 196.07133   | 32.65834   | 163.67316   | 17.92992   | Detected | Detected    | Detected    | Detected    |
| 757 | A_23_P163697  | SYT17        | Hs.258326 | synaptotagmin XVII                                                          | Homo sapiens synaptotagmin XVII (SYT17), mRNA [NM_016524]                                                                   | 6.21600 | up | 7.18347  | up | 18.09910    | 3.01494    | 20.26524    | 2.48762    | Detected | Compromised | Detected    | Compromised |
| 758 | A_33_P3284508 | CD14         | Hs.163867 | CD14 molecule                                                               | Homo sapiens CD14 molecule (CD14), transcript variant 1, mRNA [NM_000591]                                                   | 6.21590 | up | 6.43557  | up | 2234.99320  | 372.31020  | 2127.98050  | 291.57208  | Detected | Detected    | Detected    | Detected    |
| 759 | A_33_P3290709 | EGFL6        | Hs.12844  | EGF-like-domain, multiple 6                                                 | Homo sapiens EGF-like-domain, multiple 6 (EGFL6), mRNA [NM_015507]                                                          | 6.20943 | up | 4.01966  | up | 66.06165    | 11.01617   | 57.18763    | 12.54521   | Detected | Compromised | Detected    | Compromised |
| 760 | A_33_P3322999 | C10orf105    | Hs.568788 | chromosome 10 open reading frame 105                                        | Homo sapiens chromosome 10 open reading frame 105 (C10orf105), mRNA [NM_001164375]                                          | 6.20651 | up | 12.85524 | up | 19.06629    | 3.18091    | 72.14101    | 4.94843    | Detected | Compromised | Detected    | Compromised |

|     |               |          |           |                                                                                      |                                                                                                                                                                                                                                                 |         |    |          |    |             |            |             |            |          |             |             |             |
|-----|---------------|----------|-----------|--------------------------------------------------------------------------------------|-------------------------------------------------------------------------------------------------------------------------------------------------------------------------------------------------------------------------------------------------|---------|----|----------|----|-------------|------------|-------------|------------|----------|-------------|-------------|-------------|
| 761 | A_23_P213699  | NRG2     | Hs.408515 | neuregulin 2                                                                         | Homo sapiens neuregulin 2 (NRG2), transcript variant 3, mRNA [NM_013982]                                                                                                                                                                        | 6.20311 | up | 5.71832  | up | 185.20956   | 30.91628   | 118.61247   | 18.29059   | Detected | Detected    | Detected    | Detected    |
| 762 | A_23_P76823   | ADSSL1   | Hs.592327 | adenylosuccinate synthase like 1                                                     | Homo sapiens adenylosuccinate synthase like 1 (ADSSL1), transcript variant 1, mRNA [NM_199165]                                                                                                                                                  | 6.19948 | up | 6.53409  | up | 1545.11170  | 258.07016  | 1630.57210  | 220.04967  | Detected | Detected    | Detected    | Detected    |
| 763 | A_23_P421379  | IGF2     | Hs.272259 | insulin-like growth factor 2 (somatomedin A)                                         | Homo sapiens insulin-like growth factor 2 (somatomedin A) (IGF2), transcript variant 1, mRNA [NM_000612]                                                                                                                                        | 6.19029 | up | 9.52472  | up | 97.98582    | 16.39024   | 134.85498   | 12.48476   | Detected | Compromised | Detected    | Compromised |
| 764 | A_23_P36795   | SYT1     | Hs.310545 | synaptotagmin 1                                                                      | Homo sapiens synaptotagmin 1 (SYT1), transcript variant 1, mRNA [NM_005639]                                                                                                                                                                     | 6.18858 | up | 3.07687  | up | 25.03312    | 4.18848    | 10.26871    | 2.94288    | Detected | Compromised | Compromised | Compromised |
| 765 | A_23_P116642  | SLC26A10 | Hs.159481 | solute carrier family 26, member 10                                                  | Homo sapiens solute carrier family 26, member 10 (SLC26A10), mRNA [NM_133489]                                                                                                                                                                   | 6.17976 | up | 7.61056  | up | 346.27853   | 58.02129   | 409.56076   | 47.45342   | Detected | Detected    | Detected    | Detected    |
| 766 | A_33_P3405213 | PECAM1   | Hs.514412 | platelet/endothelial cell adhesion molecule                                          | Homo sapiens platelet/endothelial cell adhesion molecule (PECAM1), mRNA [NM_000442]                                                                                                                                                             | 6.17553 | up | 7.17261  | up | 134.79103   | 22.60061   | 108.91990   | 13.39046   | Detected | Detected    | Detected    | Compromised |
| 767 | A_33_P3293918 | SH2D3C   | Hs.306412 | SH2 domain containing 3C                                                             | Homo sapiens SH2 domain containing 3C (SH2D3C), transcript variant 1, mRNA [NM_170600]                                                                                                                                                          | 6.17456 | up | 9.94581  | up | 68.12656    | 11.42467   | 56.33297    | 4.99445    | Detected | Compromised | Detected    | Compromised |
| 768 | A_23_P204947  | GJB2     | Hs.524894 | gap junction protein, beta 2, 26kDa                                                  | Homo sapiens gap junction protein, beta 2, 26kDa (GJB2), mRNA [NM_004004]                                                                                                                                                                       | 6.16611 | up | 5.10954  | up | 19.86098    | 3.33521    | 17.26534    | 2.97960    | Detected | Compromised | Detected    | Compromised |
| 769 | A_33_P3232354 | BTBD8    | Hs.676102 | BTB (POZ) domain containing 8                                                        | Homo sapiens BTB (POZ) domain containing 8 (BTBD8), mRNA [NM_183242]                                                                                                                                                                            | 6.15981 | up | 1.88405  | up | 20.03293    | 3.36752    | 13.84200    | 6.47845    | Detected | Compromised | Detected    | Compromised |
| 770 | A_33_P3267230 | TBC1D3G  | Hs.617010 | TBC1 domain family, member 3G                                                        | Homo sapiens TBC1 domain family, member 3G (TBC1D3G), mRNA [NM_01040282]                                                                                                                                                                        | 6.15488 | up | 5.37048  | up | 972.72296   | 163.64487  | 780.97460   | 128.23001  | Detected | Detected    | Detected    | Detected    |
| 771 | A_33_P3844650 | ANGPTL2  | Hs.653262 | angiotensin-like 2                                                                   | Homo sapiens angiotensin-like 2 (ANGPTL2), mRNA [NM_012098]                                                                                                                                                                                     | 6.14893 | up | 5.33197  | up | 16207.33000 | 2729.26030 | 17331.30700 | 2866.21850 | Detected | Detected    | Detected    | Detected    |
| 772 | A_33_P3247117 | CXorf1   | Hs.106688 | chromosome X open reading frame 1                                                    | Homo sapiens chromosome X open reading frame 1 (CXorf1), mRNA [NM_004709]                                                                                                                                                                       | 6.14153 | up | 6.05791  | up | 22.36280    | 3.77036    | 21.87972    | 3.18482    | Detected | Compromised | Detected    | Compromised |
| 773 | A_33_P3246997 |          | Hs.130293 |                                                                                      | Cisplatin resistance-associated overexpressed protein (cAMP regulatory element-associated protein 1)(CRE-associated protein 1)(LUC7A)(Okadaic acid-inducible phosphoprotein DA48-18) [Source:UniProtKB/Swiss-Prot;Acc:O95232] [ENST00000311571] | 6.14053 | up | 6.39213  | up | 618.27190   | 104.25731  | 299.26996   | 41.28412   | Detected | Detected    | Detected    | Detected    |
| 774 | A_33_P3315342 | ARHGEF19 | Hs.591532 | Rho guanine nucleotide exchange factor (GEF) 19                                      | Homo sapiens Rho guanine nucleotide exchange factor (GEF) 19 (ARHGEF19), mRNA [NM_153213]                                                                                                                                                       | 6.13765 | up | 5.85844  | up | 82.18242    | 13.86469   | 125.20313   | 18.84511   | Detected | Compromised | Detected    | Detected    |
| 775 | A_23_P500400  | ABCA6    | Hs.709514 | ATP-binding cassette, sub-family A (ABC1), member 6                                  | Homo sapiens ATP-binding cassette, sub-family A (ABC1), member 6 (ABCA6), mRNA [NM_080284]                                                                                                                                                      | 6.12629 | up | 6.37888  | up | 3165.52730  | 535.03450  | 2400.01460  | 331.76846  | Detected | Detected    | Detected    | Detected    |
| 776 | A_23_P342398  | C12orf33 | Hs.408739 | chromosome 12 open reading frame 33                                                  | PREDICTED: Homo sapiens chromosome 12 open reading frame 33 (C12orf33), miscRNA [XR_041988]                                                                                                                                                     | 6.05879 | up | 2.37705  | up | 22.64219    | 3.86959    | 8.80809     | 3.26745    | Detected | Compromised | Compromised | Compromised |
| 777 | A_33_P3388653 | PDE4D    | Hs.117545 | phosphodiesterase 4D, cAMP-specific (phosphodiesterase E3 dunce homolog, Drosophila) | Homo sapiens phosphodiesterase 4D, cAMP-specific (phosphodiesterase E3 dunce homolog, Drosophila) (PDE4D), transcript variant 3, mRNA [NM_001165899]                                                                                            | 6.04372 | up | 6.58585  | up | 3283.78250  | 562.60430  | 2216.23540  | 296.73550  | Detected | Detected    | Detected    | Detected    |
| 778 | A_23_P250245  | CD72     | Hs.116481 | CD72 molecule                                                                        | Homo sapiens CD72 molecule (CD72), mRNA [NM_001782]                                                                                                                                                                                             | 6.03851 | up | 5.49951  | up | 109.94769   | 18.85338   | 103.73989   | 16.63365   | Detected | Detected    | Detected    | Detected    |
| 779 | A_24_P99046   | STK38L   | Hs.184523 | serine/threonine kinase 38 like                                                      | Homo sapiens serine/threonine kinase 38 like (STK38L), mRNA [NM_015000]                                                                                                                                                                         | 6.03750 | up | 4.23339  | up | 125.80090   | 21.57544   | 73.38590    | 15.28585   | Detected | Detected    | Detected    | Detected    |
| 780 | A_33_P3367301 | GJD3     | Hs.444663 | gap junction protein, delta 3, 31.9kDa                                               | Homo sapiens gap junction protein, delta 3, 31.9kDa (GJD3), mRNA [NM_152219]                                                                                                                                                                    | 6.03524 | up | 5.90245  | up | 4682.28800  | 803.33530  | 2914.62430  | 435.42780  | Detected | Detected    | Detected    | Detected    |
| 781 | A_23_P420863  | NOD2     | Hs.592072 | nucleotide-binding oligomerization domain containing 2                               | Homo sapiens nucleotide-binding oligomerization domain containing 2 (NOD2), mRNA [NM_022162]                                                                                                                                                    | 6.03295 | up | 4.85235  | up | 18.15163    | 3.11544    | 14.23124    | 2.58616    | Detected | Compromised | Detected    | Compromised |
| 782 | A_23_P53724   | CLSTN3   | Hs.535378 | calsynenin 3                                                                         | Homo sapiens calsynenin 3 (CLSTN3), mRNA [NM_014716]                                                                                                                                                                                            | 6.03191 | up | 2.80809  | up | 108.27712   | 18.58726   | 127.87801   | 40.15599   | Detected | Detected    | Detected    | Detected    |
| 783 | A_33_P3306110 | CALCLRL  | Hs.470882 | calcitonin receptor-like                                                             | Homo sapiens calcitonin receptor-like (CALCLRL), mRNA [NM_005795]                                                                                                                                                                               | 6.03133 | up | 3.10278  | up | 32.64962    | 5.60529    | 20.93564    | 5.94978    | Detected | Compromised | Detected    | Compromised |
| 784 | A_33_P3237215 | FBX024   | Hs.283764 | F-box protein 24                                                                     | Homo sapiens F-box protein 24 (FBX024), transcript variant 1, mRNA [NM_033506]                                                                                                                                                                  | 6.01333 | up | 2.32955  | up | 22.18432    | 3.82001    | 8.49560     | 3.21579    | Detected | Compromised | Compromised | Compromised |
| 785 | A_24_P389415  | PNMA2    | Hs.591838 | paraneoplastic antigen MA2                                                           | Homo sapiens paraneoplastic antigen MA2 (PNMA2), mRNA [NM_007257]                                                                                                                                                                               | 6.00116 | up | 4.51192  | up | 18.10950    | 3.12467    | 15.36844    | 3.00355    | Detected | Compromised | Detected    | Compromised |
| 786 | A_24_P68079   | TRANK1   | Hs.170999 | tetratricopeptide repeat and ankyrin repeat containing 1                             | Homo sapiens tetratricopeptide repeat and ankyrin repeat containing 1 (TRANK1), mRNA [NM_014831]                                                                                                                                                | 6.00027 | up | 10.08452 | up | 180.18192   | 31.09379   | 103.40311   | 9.04157    | Detected | Detected    | Detected    | Compromised |
| 787 | A_23_P45365   | COL4A5   | Hs.369089 | collagen, type IV, alpha 5                                                           | Homo sapiens collagen, type IV, alpha 5 (COL4A5), transcript variant 2, mRNA [NM_033380]                                                                                                                                                        | 5.99631 | up | 5.00334  | up | 848.75995   | 146.56627  | 580.25070   | 102.26360  | Detected | Detected    | Detected    | Detected    |
| 788 | A_24_P122746  | VWA1     | Hs.449009 | von Willebrand factor A domain containing 1                                          | Homo sapiens von Willebrand factor A domain containing 1 (VWA1), transcript variant 1, mRNA [NM_022834]                                                                                                                                         | 5.98979 | up | 11.43424 | up | 49.22819    | 8.51012    | 35.62725    | 2.74752    | Detected | Compromised | Detected    | Compromised |
| 789 | A_23_P134176  | SOD2     | Hs.487046 | superoxide dismutase 2, mitochondrial                                                | Homo sapiens superoxide dismutase 2, mitochondrial (SOD2), nuclear gene encoding mitochondrial protein, transcript variant 2, mRNA [NM_001024465]                                                                                               | 5.96872 | up | 5.26832  | up | 38512.18800 | 6681.13430 | 41074.55500 | 6874.89900 | Detected | Detected    | Detected    | Detected    |

|     |               |              |           |                                                      |                                                                                                                                                          |         |    |          |    |            |            |            |            |          |             |             |             |
|-----|---------------|--------------|-----------|------------------------------------------------------|----------------------------------------------------------------------------------------------------------------------------------------------------------|---------|----|----------|----|------------|------------|------------|------------|----------|-------------|-------------|-------------|
| 790 | A_23_P74088   | MMP23B       | Hs.192316 | matrix metalloproteinase 23B                         | Homo sapiens matrix metalloproteinase 23B (MMP23B), mRNA [NM_006983]                                                                                     | 5.96488 | up | 4.25727  | up | 332.33850  | 57.69151   | 287.20184  | 59.48697   | Detected | Detected    | Detected    | Detected    |
| 791 | A_24_P185709  | EPB41L1      | Hs.704100 | erythrocyte membrane protein band 4.1-like 1         | Homo sapiens erythrocyte membrane protein band 4.1-like 1 (EPB41L1), transcript variant 1, mRNA [NM_012156]                                              | 5.95977 | up | 5.99127  | up | 405.51980  | 70.45564   | 326.80048  | 48.09829   | Detected | Detected    | Detected    | Detected    |
| 792 | A_23_P160214  | TTC39A       | Hs.112949 | tetratricopeptide repeat domain 39A                  | Homo sapiens tetratricopeptide repeat domain 39A (TTC39A), transcript variant 2, mRNA [NM_001080494]                                                     | 5.95285 | up | 6.63346  | up | 44.53681   | 7.74689    | 29.42247   | 3.91115    | Detected | Compromised | Detected    | Compromised |
| 793 | A_33_P3326904 | LOC728650    | Hs.696467 | hypothetical LOC728650                               | PREDICTED: Homo sapiens hypothetical LOC728650 (LOC728650), mRNA [XM_002347291]                                                                          | 5.94082 | up | 6.81868  | up | 352.75470  | 61.48365   | 252.71835  | 32.68150   | Detected | Detected    | Detected    | Detected    |
| 794 | A_33_P3337267 | NRARP        | Hs.535075 | NOTCH-regulated ankyrin repeat protein               | Homo sapiens NOTCH-regulated ankyrin repeat protein (NRARP), mRNA [NM_001004354]                                                                         | 5.93998 | up | 3.21015  | up | 18.49615   | 3.22425    | 9.88387    | 2.71499    | Detected | Compromised | Compromised | Compromised |
| 795 | A_23_P214360  | IRF4         | Hs.401013 | interferon regulatory factor 4                       | Homo sapiens interferon regulatory factor 4 (IRF4), mRNA [NM_002460]                                                                                     | 5.92326 | up | 1.23252  | up | 19.71884   | 3.44710    | 4.15737    | 2.97435    | Detected | Compromised | Compromised | Compromised |
| 796 | A_33_P3283213 | MGC57346     | Hs.654930 | hypothetical LOC401884                               | Homo sapiens hypothetical LOC401884 (MGC57346), transcript variant 2, non-coding RNA [NR_027295]                                                         | 5.91347 | up | 6.22101  | up | 85.84335   | 15.03132   | 67.44554   | 9.55999    | Detected | Compromised | Detected    | Compromised |
| 797 | A_33_P3280157 | SNORD116-19  | Hs.680185 | small nucleolar RNA, C/D box 116-19                  | Homo sapiens small nucleolar RNA, C/D box 116-19 (SNORD116-19), small nucleolar RNA [NR_001290]                                                          | 5.91295 | up | 6.30276  | up | 538.43024  | 94.28845   | 507.06560  | 70.94123   | Detected | Detected    | Detected    | Detected    |
| 798 | A_23_P157963  | ONTLN        | Hs.435381 | centlein, centrosomal protein                        | Homo sapiens centlein, centrosomal protein (CNTLN), transcript variant 1, mRNA [NM_017738]                                                               | 5.90464 | up | 5.19585  | up | 237.04797  | 41.56959   | 148.71367  | 25.23831   | Detected | Detected    | Detected    | Detected    |
| 799 | A_33_P3326483 | CRABP1       | Hs.346950 | cellular retinoic acid binding protein 1             | Homo sapiens cellular retinoic acid binding protein 1 (CRABP1), mRNA [NM_004378]                                                                         | 5.89411 | up | 13.01186 | up | 74.64743   | 13.11383   | 55.41202   | 3.75517    | Detected | Compromised | Detected    | Compromised |
| 800 | A_24_P256380  | GPR177       | Hs.647659 | G protein-coupled receptor 177                       | Homo sapiens G protein-coupled receptor 177 (GPR177), transcript variant 1, mRNA [NM_024911]                                                             | 5.88334 | up | 5.71197  | up | 6315.05860 | 1111.44170 | 3967.65280 | 612.51050  | Detected | Detected    | Detected    | Detected    |
| 801 | A_33_P3252539 | HIGD1C       | Hs.702849 | HIG1 hypoxia inducible domain family, member 1C      | Homo sapiens HIG1 hypoxia inducible domain family, member 1C (HIGD1C), mRNA [NM_001109618]                                                               | 5.87811 | up | 2.79158  | up | 21.88695   | 3.85550    | 10.45727   | 3.30319    | Detected | Compromised | Compromised | Compromised |
| 802 | A_33_P3234804 | CBR4         | Hs.659311 | carbonyl reductase 4                                 | Homo sapiens carbonyl reductase 4 (CBR4), mRNA [NM_032783]                                                                                               | 5.87159 | up | 6.31673  | up | 2664.11250 | 469.81808  | 1800.62900 | 251.36093  | Detected | Detected    | Detected    | Detected    |
| 803 | A_33_P3375710 |              |           |                                                      |                                                                                                                                                          | 5.86560 | up | 6.35124  | up | 558.00085  | 98.50436   | 544.37286  | 75.57945   | Detected | Detected    | Detected    | Detected    |
| 804 | A_33_P3249274 | LOC100127967 | Hs.689466 | hypothetical protein LOC100127967                    | Homo sapiens cDNA FLJ46267 fis, clone TEST4027170, [AK128146]                                                                                            | 5.83183 | up | 5.08613  | up | 17.05671   | 3.02847    | 14.34302   | 2.48667    | Detected | Compromised | Detected    | Compromised |
| 805 | A_33_P3370094 | MME          | Hs.307734 | membrane metallo-endopeptidase                       | Homo sapiens membrane metallo-endopeptidase (MME), transcript variant 2b, mRNA [NM_007289]                                                               | 5.82983 | up | 5.34548  | up | 7869.74170 | 1397.77590 | 6427.11570 | 1060.21730 | Detected | Detected    | Detected    | Detected    |
| 806 | A_33_P3306202 | LOC653602    | Hs.657296 | hypothetical LOC653602                               | Homo sapiens cDNA FLJ35392 fis, clone SKNSH2000716 [AK092711]                                                                                            | 5.82338 | up | 5.38890  | up | 169.04843  | 30.05863   | 107.83158  | 17.64457   | Detected | Detected    | Detected    | Detected    |
| 807 | A_33_P3227400 | COL4A4       | Hs.591645 | collagen, type IV, alpha 4                           | Homo sapiens collagen, type IV, alpha 4 (COL4A4), mRNA [NM_000092]                                                                                       | 5.82134 | up | 6.36245  | up | 254.18837  | 45.21323   | 213.89528  | 29.64439   | Detected | Detected    | Detected    | Detected    |
| 808 | A_32_P88905   |              |           |                                                      |                                                                                                                                                          | 5.81273 | up | 6.29335  | up | 7422.15400 | 1322.15720 | 6680.93100 | 936.09680  | Detected | Detected    | Detected    | Detected    |
| 809 | A_33_P3307197 | PTGFRN       | Hs.418093 | prostaglandin F2 receptor negative regulator         | Homo sapiens prostaglandin F2 receptor negative regulator (PTGFRN), mRNA [NM_020440]                                                                     | 5.81183 | up | 6.18457  | up | 2294.32130 | 408.76584  | 1267.54250 | 180.72510  | Detected | Detected    | Detected    | Detected    |
| 810 | A_33_P3351249 | CXCL16       | Hs.513885 | chemokine (C-X-C motif) ligand 16                    | Homo sapiens chemokine (C-X-C motif) ligand 16 (CXCL16), transcript variant 2, mRNA [NM_001100812]                                                       | 5.80824 | up | 5.03708  | up | 214.68492  | 38.27278   | 215.68155  | 37.75723   | Detected | Detected    | Detected    | Detected    |
| 811 | A_23_P380379  |              | Hs.407154 |                                                      | Calcyphosin-2 (Calcyphosin-2) [Source:UniProtKB/Swiss-Prot;Acc:Q9BXYS] [ENST00000328705]                                                                 | 5.80331 | up | 1.38362  | up | 17.81407   | 3.17849    | 17.01925   | 10.84651   | Detected | Compromised | Detected    | Compromised |
| 812 | A_23_P305198  | STAT4        | Hs.80642  | signal transducer and activator of transcription 4   | Homo sapiens signal transducer and activator of transcription 4 (STAT4), mRNA [NM_003151]                                                                | 5.79822 | up | 7.17099  | up | 17.02406   | 3.04020    | 20.34003   | 2.50114    | Detected | Compromised | Detected    | Compromised |
| 813 | A_32_P396186  | TRIM66       | Hs.130836 | tripartite motif-containing 66                       | Homo sapiens tripartite motif-containing 66 (TRIM66), mRNA [NM_014918]                                                                                   | 5.79272 | up | 4.92168  | up | 524.36084  | 93.73052   | 239.64003  | 42.93500   | Detected | Detected    | Detected    | Detected    |
| 814 | A_24_P319113  | P2RX7        | Hs.507102 | purinergic receptor P2X, ligand-gated ion channel, 7 | Homo sapiens purinergic receptor P2X, ligand-gated ion channel, 7 (P2RX7), mRNA [NM_002562]                                                              | 5.78814 | up | 3.38354  | up | 16.90800   | 3.02473    | 9.65661    | 2.51663    | Detected | Compromised | Compromised | Compromised |
| 815 | A_33_P3409027 |              |           |                                                      | Putative helicase Mov101 (EC 3.6.1.-X/Moloney leukemia virus 10-like protein 1)(MOV10-like 1) [Source:UniProtKB/Swiss-Prot;Acc:Q9BX16] [ENST00000354853] | 5.77828 | up | 2.51641  | up | 18.43828   | 3.30411    | 10.07463   | 3.53032    | Detected | Compromised | Compromised | Compromised |
| 816 | A_33_P3209361 | LOC100130015 | Hs.599784 | hypothetical LOC100130015                            | Homo sapiens hypothetical LOC100130015 (LOC100130015), transcript variant 2, non-coding RNA [NR_027335]                                                  | 5.76333 | up | 10.97750 | up | 196.01775  | 35.21719   | 247.27779  | 19.86311   | Detected | Detected    | Detected    | Detected    |
| 817 | A_33_P3356356 | LOC100131089 | Hs.386000 | hypothetical protein LOC100131089                    | Homo sapiens cDNA FLJ45796 fis, clone NT2R2012542, [AK127696]                                                                                            | 5.75596 | up | 4.49596  | up | 17.09302   | 3.07493    | 12.98163   | 2.54608    | Detected | Compromised | Detected    | Compromised |
| 818 | A_24_P370156  | MAN2B1       | Hs.356769 | mannosidase, alpha, class 2B, member 1               | Homo sapiens mannosidase, alpha, class 2B, member 1 (MAN2B1), mRNA [NM_000528]                                                                           | 5.75441 | up | 4.45714  | up | 4426.14940 | 796.45040  | 3857.49950 | 763.15906  | Detected | Detected    | Detected    | Detected    |
| 819 | A_33_P3242863 | NT5M         | Hs.513977 | 5'-3'-nucleotidase, mitochondrial                    | Homo sapiens 5'-3'-nucleotidase, mitochondrial (NT5M), nuclear gene encoding mitochondrial protein, mRNA [NM_020201]                                     | 5.75228 | up | 5.57370  | up | 4248.41700 | 764.75183  | 3433.95200 | 543.27030  | Detected | Detected    | Detected    | Detected    |
| 820 | A_33_P3274562 | SLC19A3      | Hs.221597 | solute carrier family 19, member 3                   | Homo sapiens solute carrier family 19, member 3 (SLC19A3), mRNA [NM_025243]                                                                              | 5.75014 | up | 22.75973 | up | 91.46468   | 16.47054   | 86.49270   | 3.35103    | Detected | Compromised | Detected    | Compromised |
| 821 | A_33_P3278455 | ANKRD6       | Hs.702213 | ankyrin repeat domain 6                              | Homo sapiens ankyrin repeat domain 6 (ANKRD6), mRNA [NM_014942]                                                                                          | 5.74298 | up | 8.15369  | up | 62.13267   | 11.20253   | 52.52755   | 5.68066    | Detected | Compromised | Detected    | Compromised |

|     |               |              |           |                                                                     |                                                                                                                                        |         |    |          |    |             |            |             |            |          |             |             |             |
|-----|---------------|--------------|-----------|---------------------------------------------------------------------|----------------------------------------------------------------------------------------------------------------------------------------|---------|----|----------|----|-------------|------------|-------------|------------|----------|-------------|-------------|-------------|
| 822 | A_23_P002464  | NOS2         | Hs.709191 | nitric oxide synthase 2, inducible                                  | Homo sapiens nitric oxide synthase 2, inducible (NOS2), mRNA [NM_000625]                                                               | 5.73767 | up | 5.57756  | up | 41.90181    | 7.56190    | 27.47658    | 4.34394    | Detected | Compromised | Detected    | Compromised |
| 823 | A_24_P264166  | GOLGA8F      | Hs.510812 | golgi autoantigen, golgin subfamily a, 8F                           | Homo sapiens golgi autoantigen, golgin subfamily a, 8F (GOLGA8F), mRNA [NM_001012452]                                                  | 5.73411 | up | 10.07385 | up | 216.56589   | 39.10727   | 95.13943    | 8.32781    | Detected | Detected    | Detected    | Compromised |
| 824 | A_23_P109171  | BFSP1        | Hs.129702 | beaded filament structural protein 1, filensin                      | Homo sapiens beaded filament structural protein 1, filensin (BFSP1), transcript variant 1, mRNA [NM_001185]                            | 5.73304 | up | 5.39961  | up | 2199.23070  | 397.20908  | 1914.57340  | 312.66193  | Detected | Detected    | Detected    | Detected    |
| 825 | A_33_P3284315 | LOC729076    | Hs.609521 | hypothetical LOC729076                                              | PREDICTED: Homo sapiens hypothetical LOC729076 (LOC729076), mRNA [XM_001132474]                                                        | 5.71491 | up | 4.60759  | up | 17.57098    | 3.18361    | 14.14493    | 2.70703    | Detected | Compromised | Detected    | Compromised |
| 826 | A_23_P119562  | CFD          | Hs.155597 | complement factor D (adipsin)                                       | Homo sapiens complement factor D (adipsin) (CFD), mRNA [NM_001928]                                                                     | 5.71213 | up | 4.96521  | up | 23835.96700 | 4320.83700 | 28125.65800 | 4994.94140 | Detected | Detected    | Detected    | Detected    |
| 827 | A_33_P3270489 | C6orf97      | Hs.660044 | chromosome 6 open reading frame 97                                  | Homo sapiens chromosome 6 open reading frame 97 (C6orf97), mRNA [NM_025059]                                                            | 5.71092 | up | 8.21839  | up | 145.51329   | 26.38336   | 87.39236    | 9.37675    | Detected | Detected    | Detected    | Compromised |
| 828 | A_23_P207850  | TNS4         | Hs.438292 | tensin 4                                                            | Homo sapiens tensin 4 (TNS4), mRNA [NM_032865]                                                                                         | 5.70280 | up | 6.07952  | up | 381.07263   | 69.19153   | 466.15408   | 67.61229   | Detected | Detected    | Detected    | Detected    |
| 829 | A_23_P212968  | UGT2B11      | Hs.339811 | UDP glucuronosyltransferase 2 family, polypeptide B11               | Homo sapiens UDP glucuronosyltransferase 2 family, polypeptide B11 (UGT2B11), mRNA [NM_001073]                                         | 5.69977 | up | 2.33372  | up | 20.71307    | 3.76288    | 8.85763     | 3.34683    | Detected | Compromised | Compromised | Compromised |
| 830 | A_24_P101704  | ROR2         | Hs.98255  | receptor tyrosine kinase-like orphan receptor 2                     | Homo sapiens receptor tyrosine kinase-like orphan receptor 2 (ROR2), mRNA [NM_004560]                                                  | 5.69659 | up | 13.19707 | up | 36.80332    | 6.68968    | 43.71309    | 2.92079    | Detected | Compromised | Detected    | Compromised |
| 831 | A_32_P187704  | LOC100127998 | Hs.591869 | hypothetical LOC100127998                                           | PREDICTED: Homo sapiens hypothetical LOC100127998 (LOC100127998), mRNA [XM_001714676]                                                  | 5.69240 | up | 5.32094  | up | 85.97659    | 15.63932   | 72.32417    | 11.98562   | Detected | Compromised | Detected    | Compromised |
| 832 | A_23_P428260  | STEAP2       | Hs.489051 | six transmembrane epithelial antigen of the prostate 2              | Homo sapiens six transmembrane epithelial antigen of the prostate 2 (STEAP2), transcript variant 1, mRNA [NM_152999]                   | 5.69225 | up | 5.91260  | up | 3822.22750  | 695.28955  | 2244.31150  | 334.71100  | Detected | Detected    | Detected    | Detected    |
| 833 | A_32_P151263  | SLC2A4       | Hs.380691 | solute carrier family 2 (facilitated glucose transporter), member 4 | Homo sapiens solute carrier family 2 (facilitated glucose transporter), member 4 (SLC2A4), mRNA [NM_001042]                            | 5.68747 | up | 2.61647  | up | 18.87401    | 3.43620    | 8.62833     | 2.90788    | Detected | Compromised | Compromised | Compromised |
| 834 | A_32_P220463  | FBLL1        |           | fibrillarlin-like 1                                                 | Homo sapiens fibrillarlin-like 1 (FBLL1), non-coding RNA [NR_024356]                                                                   | 5.68176 | up | 13.53239 | up | 324.43690   | 59.12625   | 176.51984   | 11.50230   | Detected | Detected    | Detected    | Compromised |
| 835 | A_23_P18684   | CLGN         | Hs.86368  | calmegin                                                            | Homo sapiens calmegin (CLGN), transcript variant 1, mRNA [NM_004392]                                                                   | 5.67625 | up | 5.94501  | up | 1676.50040  | 342.31073  | 1546.86120  | 229.43753  | Detected | Detected    | Detected    | Detected    |
| 836 | A_33_P3336592 | LOC283711    | Hs.585100 | hypothetical protein LOC283711                                      | Homo sapiens cDNA FLJ45109 fis. clone BRAWH3034097 [AK127052]                                                                          | 5.67373 | up | 6.77588  | up | 212.14960   | 38.71746   | 182.26791   | 23.71974   | Detected | Detected    | Detected    | Detected    |
| 837 | A_23_P217528  | KLF8         | Hs.646614 | Kruppel-like factor 8                                               | Homo sapiens Kruppel-like factor 8 (KLF8), transcript variant 1, mRNA [NM_007250]                                                      | 5.67139 | up | 4.76536  | up | 75.23125    | 13.73542   | 61.31319    | 11.34551   | Detected | Compromised | Detected    | Compromised |
| 838 | A_24_P42446   | PURG         | Hs.373778 | purine-rich element binding protein G                               | Homo sapiens purine-rich element binding protein G (PURG), transcript variant B, mRNA [NM_001015508]                                   | 5.66121 | up | 3.23417  | up | 17.76934    | 3.25009    | 10.10114    | 2.75406    | Detected | Compromised | Compromised | Compromised |
| 839 | A_23_P17345   | MAFB         | Hs.169487 | v-maf musculoaponeurotic fibrosarcoma oncogene homolog B (avian)    | Homo sapiens v-maf musculoaponeurotic fibrosarcoma oncogene homolog B (avian) (MAFB), mRNA [NM_005461]                                 | 5.66114 | up | 5.76740  | up | 5045.40230  | 922.83620  | 4115.01370  | 629.15340  | Detected | Detected    | Detected    | Detected    |
| 840 | A_33_P3375809 | LOC729970    | Hs.297988 | similar to hCG2028352                                               | PREDICTED: Homo sapiens similar to hCG2028352 (LOC729970), mRNA [XM_001129522]                                                         | 5.65927 | up | 4.86005  | up | 995.84730   | 182.20726  | 814.28485   | 147.74089  | Detected | Detected    | Detected    | Detected    |
| 841 | A_23_P404606  | C5orf41      | Hs.484195 | chromosome 5 open reading frame 41                                  | Homo sapiens chromosome 5 open reading frame 41 (C5orf41), mRNA [NM_153607]                                                            | 5.65175 | up | 5.66235  | up | 4124.22900  | 755.60140  | 1835.82480  | 285.89050  | Detected | Detected    | Detected    | Detected    |
| 842 | A_24_P245815  | ASPHD2       | Hs.567547 | aspartate beta-hydroxylase domain containing 2                      | Homo sapiens aspartate beta-hydroxylase domain containing 2 (ASPHD2), mRNA [NM_020437]                                                 | 5.64790 | up | 5.98546  | up | 306.69100   | 56.22733   | 317.02075   | 46.70420   | Detected | Detected    | Detected    | Detected    |
| 843 | A_24_P158718  | DTX4         | Hs.523696 | deltex homolog 4 (Drosophila)                                       | Homo sapiens deltex homolog 4 (Drosophila) (DTX4), mRNA [NM_015177]                                                                    | 5.64187 | up | 4.28570  | up | 41.44530    | 7.60650    | 34.24625    | 7.04623    | Detected | Compromised | Detected    | Compromised |
| 844 | A_33_P3290800 | DDX26B       | Hs.496829 | DEAD/H (Asp-Glu-Ala-Asp/His) box polypeptide 26B                    | Homo sapiens DEAD/H (Asp-Glu-Ala-Asp/His) box polypeptide 26B (DDX26B), mRNA [NM_182540]                                               | 5.61804 | up | 6.90530  | up | 193.87960   | 35.73391   | 150.07372   | 19.16407   | Detected | Detected    | Detected    | Detected    |
| 845 | A_23_P36972   | ZIC2         | Hs.653700 | Zic family member 2 (odd-paired homolog, Drosophila)                | Homo sapiens Zic family member 2 (odd-paired homolog, Drosophila) (ZIC2), mRNA [NM_007129]                                             | 5.61189 | up | 2.29540  | up | 18.38676    | 3.39258    | 7.45333     | 2.86323    | Detected | Compromised | Compromised | Compromised |
| 846 | A_32_P183904  | SHF          | Hs.310399 | Src homology 2 domain containing F                                  | Homo sapiens Src homology 2 domain containing F (SHF), mRNA [NM_138356]                                                                | 5.60931 | up | 6.27405  | up | 381.23312   | 70.37430   | 315.02243   | 44.27502   | Detected | Detected    | Detected    | Detected    |
| 847 | A_24_P300777  | ADAM8        | Hs.720760 | ADAM metalloproteinase domain 8                                     | Homo sapiens ADAM metalloproteinase domain 8 (ADAM8), transcript variant 1, mRNA [NM_001109]                                           | 5.60411 | up | 5.33758  | up | 827.43384   | 152.88332  | 726.76080   | 120.06397  | Detected | Detected    | Detected    | Detected    |
| 848 | A_23_P202245  | RET          | Hs.350321 | ret proto-oncogene                                                  | Homo sapiens ret proto-oncogene (RET), transcript variant 2, mRNA [NM_020975]                                                          | 5.60159 | up | 3.62481  | up | 21.89975    | 4.04819    | 14.71816    | 3.58042    | Detected | Compromised | Compromised | Compromised |
| 849 | A_33_P3329339 | LOC644990    | Hs.631912 | hypothetical LOC644990                                              | PREDICTED: Homo sapiens hypothetical LOC644990 (LOC644990), miscRNA [XR_040213]                                                        | 5.59452 | up | 9.59812  | up | 123.95170   | 22.94157   | 113.72761   | 10.44829   | Detected | Detected    | Detected    | Compromised |
| 850 | A_33_P3388649 |              | Hs.117545 |                                                                     | cAMP-specific 3',5'-cyclic phosphodiesterase 4D (EC 3.1.4.17)(DPDE3)(PDE43) [Source:UniProtKB/Swiss-Prot;Acc:Q08499] [ENST00000309641] | 5.59388 | up | 5.79201  | up | 37.99368    | 7.03285    | 68.33392    | 10.40334   | Detected | Compromised | Detected    | Compromised |
| 851 | A_33_P3267160 | LOC100132652 | Hs.650662 | similar to hCG2038304                                               | PREDICTED: Homo sapiens similar to hCG2038304 (LOC100132652), miscRNA [XR_038224]                                                      | 5.59218 | up | 7.48485  | up | 145.90959   | 27.01693   | 51.06142    | 6.01555    | Detected | Detected    | Detected    | Compromised |

|     |               |              |           |                                                              |                                                                                                                                          |         |    |          |    |             |             |              |             |          |             |             |             |
|-----|---------------|--------------|-----------|--------------------------------------------------------------|------------------------------------------------------------------------------------------------------------------------------------------|---------|----|----------|----|-------------|-------------|--------------|-------------|----------|-------------|-------------|-------------|
| 852 | A_33_P3380783 | LOC100128184 | Hs.678942 | hypothetical protein LOC100128184                            | Homo sapiens cDNA FLJ46151 fis. clone TEST4000957. [AK128032]                                                                            | 5.59001 | up | 5.60456  | up | 1489.44760  | 275.89618   | 1721.12240   | 270.79200   | Detected | Detected    | Detected    | Detected    |
| 853 | A_32_P523096  | MGC12982     | Hs.127762 | hypothetical protein MGC12982                                | Homo sapiens hypothetical protein MGC12982 (MGC12982), non-coding RNA [NR_026878]                                                        | 5.58756 | up | 4.91043  | up | 82.64507    | 15.31539    | 70.92104     | 12.73566    | Detected | Compromised | Detected    | Compromised |
| 854 | A_33_P3389872 |              | Hs.187636 |                                                              | Leucine-rich repeat serine/threonine-protein kinase 2 (EC 2.7.11.1)(Dardarin) [Source:UniProtKB/Swiss-Prot;Acc:Q5S007] [ENST00000343742] | 5.58514 | up | 3.80030  | up | 28.54237    | 5.29163     | 32.58225     | 7.56011     | Detected | Compromised | Detected    | Compromised |
| 855 | A_24_P400044  | NUDT10       | Hs.375178 | nudix (nucleoside diphosphate linked moiety X)-type motif 10 | Homo sapiens nudix (nucleoside diphosphate linked moiety X)-type motif 10 (NUDT10), mRNA [NM_153183]                                     | 5.57245 | up | 7.12687  | up | 32.85714    | 6.10544     | 25.17526     | 3.11488     | Detected | Compromised | Detected    | Compromised |
| 856 | A_32_P64200   | GUCA1B       | Hs.446529 | guanylate cyclase activator 1B (retina)                      | Homo sapiens guanylate cyclase activator 1B (retina) (GUCA1B), mRNA [NM_002098]                                                          | 5.56881 | up | 4.99506  | up | 265.86593   | 49.43856    | 201.63210    | 35.59463    | Detected | Detected    | Detected    | Detected    |
| 857 | A_23_P254353  | NOXA1        | Hs.495554 | NADPH oxidase activator 1                                    | Homo sapiens NADPH oxidase activator 1 (NOXA1), mRNA [NM_006647]                                                                         | 5.55896 | up | 3.72103  | up | 131.27791   | 24.45296    | 184.75035    | 43.78117    | Detected | Detected    | Detected    | Detected    |
| 858 | A_23_P159027  | ZNF521       | Hs.116935 | zinc finger protein 521                                      | Homo sapiens zinc finger protein 521 (ZNF521), mRNA [NM_015461]                                                                          | 5.55093 | up | 5.20679  | up | 4290.11900  | 800.27075   | 3140.01590   | 531.77400   | Detected | Detected    | Detected    | Detected    |
| 859 | A_23_P154338  | EFHD1        | Hs.516769 | EF-hand domain family, member D1                             | Homo sapiens EF-hand domain family, member D1 (EFHD1), transcript variant 1, mRNA [NM_025202]                                            | 5.54824 | up | 4.82713  | up | 264.15594   | 49.29900    | 197.14328    | 36.01294    | Detected | Detected    | Detected    | Detected    |
| 860 | A_32_P37592   | SCARNA17     | Hs.668351 | small Cajal body-specific RNA 17                             | Homo sapiens small Cajal body-specific RNA 17 (SCARNA17), guide RNA [NR_003003]                                                          | 5.54535 | up | 5.27197  | up | 4342.96630  | 810.94310   | 4166.35060   | 696.86414   | Detected | Detected    | Detected    | Detected    |
| 861 | A_33_P3412900 | UBLN3        | Hs.207603 | cerebellin 3 precursor                                       | Homo sapiens cerebellin 3 precursor (UBLN3), mRNA [NM_001039771]                                                                         | 5.53887 | up | 5.28985  | up | 1569.42590  | 293.39510   | 985.58050    | 164.29108   | Detected | Detected    | Detected    | Detected    |
| 862 | A_23_P118392  | RASD1        | Hs.25829  | RAS, dexamethasone-induced 1                                 | Homo sapiens RAS, dexamethasone-induced 1 (RASD1), mRNA [NM_016084]                                                                      | 5.53128 | up | 5.11438  | up | 29303.37900 | 5485.62060  | 15891.10400  | 2739.84570  | Detected | Detected    | Detected    | Detected    |
| 863 | A_33_P3379967 | HLA-F        | Hs.519972 | major histocompatibility complex, class I, F                 | Homo sapiens major histocompatibility complex, class I, F (HLA-F), transcript variant 3, mRNA [NM_001098478]                             | 5.52895 | up | 3.41291  | up | 978.10693   | 183.17949   | 737.90650    | 190.65210   | Detected | Detected    | Detected    | Detected    |
| 864 | A_24_P14634   | EMID1        | Hs.289106 | EMI domain containing 1                                      | Homo sapiens EMI domain containing 1 (EMID1), mRNA [NM_133455]                                                                           | 5.52642 | up | 5.79592  | up | 57.34748    | 10.74492    | 64.32759     | 9.78679     | Detected | Compromised | Detected    | Compromised |
| 865 | A_23_P161297  | OGDHL        | Hs.17860  | oxoglutarate dehydrogenase-like                              | Homo sapiens oxoglutarate dehydrogenase-like (OGDHL), transcript variant 1, mRNA [NM_018245]                                             | 5.49945 | up | 5.85741  | up | 54.69819    | 10.29880    | 64.38902     | 9.69331     | Detected | Compromised | Detected    | Compromised |
| 866 | A_23_P41390   | SH3TC1       | Hs.479116 | SH3 domain and tetratricopeptide repeats 1                   | Homo sapiens SH3 domain and tetratricopeptide repeats 1 (SH3TC1), mRNA [NM_018986]                                                       | 5.48823 | up | 6.79118  | up | 160.36287   | 30.25551    | 147.53238    | 19.15612    | Detected | Detected    | Detected    | Detected    |
| 867 | A_23_P425332  | PPP4R4       | Hs.259599 | protein phosphatase 4, regulatory subunit 4                  | Homo sapiens protein phosphatase 4, regulatory subunit 4 (PPP4R4), transcript variant 1, mRNA [NM_058237]                                | 5.47025 | up | 8.12577  | up | 443.00223   | 83.85555    | 273.56924    | 29.68715    | Detected | Detected    | Detected    | Detected    |
| 868 | A_23_P45304   | XK           | Hs.78919  | X-linked Kx blood group (McLeod syndrome)                    | Homo sapiens X-linked Kx blood group (McLeod syndrome) (XK), mRNA [NM_021083]                                                            | 5.46634 | up | 2.66425  | up | 20.49775    | 3.88278     | 10.38769     | 3.43803     | Detected | Compromised | Compromised | Compromised |
| 869 | A_23_P3602    | NUDT7        | Hs.282665 | nudix (nucleoside diphosphate linked moiety X)-type motif 7  | Homo sapiens nudix (nucleoside diphosphate linked moiety X)-type motif 7 (NUDT7), transcript variant 1, mRNA [NM_001105663]              | 5.46080 | up | 6.36018  | up | 970.30634   | 183.98637   | 668.95490    | 92.74550    | Detected | Detected    | Detected    | Detected    |
| 870 | A_24_P231104  | LEPR         | Hs.23581  | leptin receptor                                              | Homo sapiens leptin receptor (LEPR), transcript variant 3, mRNA [NM_001003679]                                                           | 5.45812 | up | 5.87146  | up | 1074.31650  | 203.80840   | 650.25037    | 97.65616    | Detected | Detected    | Detected    | Detected    |
| 871 | A_23_P59637   | DOCK4        | Hs.654652 | dedicator of cytokinesis 4                                   | Homo sapiens dedicator of cytokinesis 4 (DOCK4), mRNA [NM_014705]                                                                        | 5.45627 | up | 6.64799  | up | 922.59220   | 175.08434   | 492.09235    | 65.27118    | Detected | Detected    | Detected    | Detected    |
| 872 | A_33_P3283744 | LOC339742    | Hs.98178  | hypothetical protein LOC339742                               | PREDICTED: Homo sapiens hypothetical protein LOC339742 (LOC339742), mRNA [XM_001714261]                                                  | 5.44652 | up | 10.73018 | up | 223.84058   | 42.55518    | 177.21689    | 14.56343    | Detected | Detected    | Detected    | Compromised |
| 873 | A_32_P75902   | C16orf73     | Hs.662737 | chromosome 16 open reading frame 73                          | Homo sapiens chromosome 16 open reading frame 73 (C16orf73), transcript variant 2, mRNA [NM_152764]                                      | 5.44206 | up | 5.56898  | up | 237.07697   | 45.10858    | 204.68510    | 32.40978    | Detected | Detected    | Detected    | Detected    |
| 874 | A_33_P3418668 | PAR-SN       | Hs.564847 | paternally expressed transcript PAR-SN                       | Homo sapiens paternally expressed transcript PAR-SN (PAR-SN), non-coding RNA [NR_022011]                                                 | 5.43909 | up | 4.20977  | up | 480.06006   | 91.39077    | 658.66907    | 137.96678   | Detected | Detected    | Detected    | Detected    |
| 875 | A_33_P3249872 | FBLN1        | Hs.24601  | fibulin 1                                                    | Homo sapiens fibulin 1 (FBLN1), transcript variant C, mRNA [NM_001996]                                                                   | 5.43235 | up | 4.71560  | up | 97043.20000 | 18497.39500 | 107709.17000 | 20141.00000 | Detected | Detected    | Detected    | Detected    |
| 876 | A_33_P3376551 | PTGFR        | Hs.654365 | prostaglandin F receptor (FP)                                | Homo sapiens prostaglandin F receptor (FP) (PTGFR), transcript variant 2, mRNA [NM_001039585]                                            | 5.42717 | up | 5.90061  | up | 5007.08060  | 955.31060   | 4037.26120   | 603.33060   | Detected | Detected    | Detected    | Detected    |
| 877 | A_33_P3306103 | CALCRL       | Hs.470882 | calcitonin receptor-like                                     | Homo sapiens calcitonin receptor-like (CALCRL), mRNA [NM_005795]                                                                         | 5.42540 | up | 1.37703  | up | 19.27153    | 3.67805     | 18.57612     | 11.89538    | Detected | Compromised | Detected    | Compromised |
| 878 | A_23_P143512  | HSF2BP       | Hs.406157 | heat shock transcription factor 2 binding protein            | Homo sapiens heat shock transcription factor 2 binding protein (HSF2BP), mRNA [NM_007031]                                                | 5.42471 | up | 3.57855  | up | 66.72583    | 12.73651    | 76.42082     | 18.83087    | Detected | Compromised | Detected    | Detected    |
| 879 | A_23_P152970  | RAPGEFL1     | Hs.632254 | Rap guanine nucleotide exchange factor (GEF)-like 1          | Homo sapiens Rap guanine nucleotide exchange factor (GEF)-like 1 (RAPGEFL1), mRNA [NM_016339]                                            | 5.42230 | up | 4.30178  | up | 75.32838    | 14.38494    | 65.30569     | 13.38655    | Detected | Compromised | Detected    | Compromised |
| 880 | A_23_P74290   | GBP5         | Hs.513726 | guanylate binding protein 5                                  | Homo sapiens guanylate binding protein 5 (GBP5), transcript variant 1, mRNA [NM_052942]                                                  | 5.42057 | up | 4.92432  | up | 652.39667   | 124.62351   | 675.21375    | 120.90954   | Detected | Detected    | Detected    | Detected    |
| 881 | A_32_P222695  | FLJ41603     | Hs.256206 | FLJ41603 protein                                             | Homo sapiens FLJ41603 protein (FLJ41603), mRNA [NM_001001669]                                                                            | 5.41923 | up | 3.37600  | up | 71.09638    | 13.58448    | 64.62899     | 16.88072    | Detected | Compromised | Detected    | Compromised |

|     |               |              |           |                                                                              |                                                                                                                                            |         |    |          |    |            |            |            |            |              |              |             |             |
|-----|---------------|--------------|-----------|------------------------------------------------------------------------------|--------------------------------------------------------------------------------------------------------------------------------------------|---------|----|----------|----|------------|------------|------------|------------|--------------|--------------|-------------|-------------|
| 882 | A_23_P63209   | HSD11B1      | Hs.195040 | hydroxysteroid (11-beta) dehydrogenase 1                                     | Homo sapiens hydroxysteroid (11-beta) dehydrogenase 1 (HSD11B1), transcript variant 2, mRNA [NM_181755]                                    | 5.41714 | up | 5.86893  | up | 1451.68270 | 277.48212  | 1199.62430 | 180.24023  | Detected     | Detected     | Detected    | Detected    |
| 883 | A_23_P333640  | PAPLN        | Hs.655583 | papilin, proteoglycan-like sulfated glycoprotein                             | Homo sapiens papilin, proteoglycan-like sulfated glycoprotein (PAPLN), mRNA [NM_173462]                                                    | 5.41395 | up | 5.85248  | up | 225.43503  | 43.11618   | 172.09070  | 25.92884   | Detected     | Detected     | Detected    | Detected    |
| 884 | A_23_P160159  | SLC2A5       | Hs.530003 | solute carrier family 2 (facilitated glucose/fructose transporter), member 5 | Homo sapiens solute carrier family 2 (facilitated glucose/fructose transporter), member 5 (SLC2A5), transcript variant 1, mRNA [NM_003039] | 5.41263 | up | 4.65819  | up | 146.28929  | 27.98577   | 110.88728  | 20.99083   | Detected     | Detected     | Detected    | Detected    |
| 885 | A_23_P98571   | C11orf66     | Hs.502726 | chromosome 11 open reading frame 66                                          | Homo sapiens chromosome 11 open reading frame 66 (C11orf66), mRNA [NM_145017]                                                              | 5.41246 | up | 3.27517  | up | 57.86992   | 11.07112   | 81.38003   | 21.91039   | Detected     | Compromised  | Detected    | Detected    |
| 886 | A_24_P390060  | IQCD         | Hs.568276 | IQ motif containing D                                                        | Homo sapiens IQ motif containing D (IQCD), mRNA [NM_138451]                                                                                | 5.40616 | up | 4.47995  | up | 603.85060  | 115.61916  | 533.98300  | 105.10408  | Detected     | Detected     | Detected    | Detected    |
| 887 | A_23_P120428  | TP53TG5      | Hs.401982 | TP53 target 5                                                                | Homo sapiens TP53 target 5 (TP53TG5), mRNA [NM_014477]                                                                                     | 5.39491 | up | 1.15118  | up | 122.44292  | 23.50081   | 8.32186    | 6.37444    | Not Detected | Not Detected | Compromised | Compromised |
| 888 | A_23_P344884  | ATPGD1       | Hs.502982 | ATP-grasp domain containing 1                                                | Homo sapiens ATP-grasp domain containing 1 (ATPGD1), transcript variant 1, mRNA [NM_001166222]                                             | 5.38964 | up | 4.79150  | up | 98.13254   | 18.85325   | 80.57062   | 14.82761   | Detected     | Compromised  | Detected    | Compromised |
| 889 | A_23_P144476  | SPRY1        | Hs.436944 | sprouty homolog 1, antagonist of FGF signaling (Drosophila)                  | Homo sapiens sprouty homolog 1, antagonist of FGF signaling (Drosophila) (SPRY1), transcript variant 2, mRNA [NM_199327]                   | 5.38631 | up | 5.49006  | up | 403.17890  | 77.50677   | 255.63626  | 41.05924   | Detected     | Detected     | Detected    | Detected    |
| 890 | A_24_P100613  | LAMA1        | Hs.270364 | laminin, alpha 1                                                             | Homo sapiens laminin, alpha 1 (LAMA1), mRNA [NM_005559]                                                                                    | 5.38319 | up | 5.46462  | up | 447.18280  | 86.01578   | 319.64080  | 51.57841   | Detected     | Detected     | Detected    | Detected    |
| 891 | A_24_P168925  | CHRD1        | Hs.496587 | chordin-like 1                                                               | Homo sapiens chordin-like 1 (CHRD1), transcript variant 1, mRNA [NM_001143981]                                                             | 5.37824 | up | 3.60071  | up | 18.17714   | 3.49960    | 12.29744   | 3.01156    | Detected     | Compromised  | Compromised | Compromised |
| 892 | A_33_P3411628 | CDKN2A       | Hs.512599 | cyclin-dependent kinase inhibitor 2A (melanoma, p16, inhibits CDK4)          | Homo sapiens cyclin-dependent kinase inhibitor 2A (melanoma, p16, inhibits CDK4) (CDKN2A), transcript variant 3, mRNA [NM_058197]          | 5.37651 | up | 5.13388  | up | 5914.95460 | 1139.15730 | 8230.98400 | 1413.74600 | Detected     | Detected     | Detected    | Detected    |
| 893 | A_23_P21092   | CALB2        | Hs.106857 | calbindin 2                                                                  | Homo sapiens calbindin 2 (CALB2), transcript variant CALB2, mRNA [NM_001740]                                                               | 5.37372 | up | 5.55155  | up | 777.09430  | 149.73784  | 418.83868  | 66.52699   | Detected     | Detected     | Detected    | Detected    |
| 894 | A_33_P3236906 | C6orf217     | Hs.510098 | chromosome 6 open reading frame 217                                          | Homo sapiens chromosome 6 open reading frame 217 (C6orf217), non-coding RNA [NR_026805]                                                    | 5.36982 | up | 11.56005 | up | 77.77840   | 14.99797   | 42.23470   | 3.22162    | Detected     | Compromised  | Detected    | Compromised |
| 895 | A_24_P381505  | GLIPR1L2     | Hs.406728 | GLI pathogenesis-related 1 like 2                                            | Homo sapiens GLI pathogenesis-related 1 like 2 (GLIPR1L2), mRNA [NM_152436]                                                                | 5.36769 | up | 4.48053  | up | 28.09599   | 5.41989    | 12.72841   | 2.50502    | Detected     | Compromised  | Detected    | Compromised |
| 896 | A_23_P304511  | ZNF397       | Hs.591061 | zinc finger protein 397                                                      | Homo sapiens zinc finger protein 397 (ZNF397), transcript variant 2, mRNA [NM_032347]                                                      | 5.36017 | up | 6.24456  | up | 74.03908   | 14.30263   | 69.64598   | 9.83467    | Detected     | Compromised  | Detected    | Compromised |
| 897 | A_33_P3685572 | LOC157562    | Hs.27371  | hypothetical protein LOC157562                                               | Homo sapiens mRNA; cDNA DKFP686N0244 (from clone DKFP686N0244) [BX649145]                                                                  | 5.35522 | up | 6.84146  | up | 682.59430  | 131.98306  | 415.00290  | 53.48939   | Detected     | Detected     | Detected    | Detected    |
| 898 | A_32_P54503   | LOC100134229 | Hs.634333 | hypothetical protein LOC100134229                                            | Homo sapiens hypothetical protein LOC100134229 (LOC100134229), non-coding RNA [NR_024451]                                                  | 5.35223 | up | 4.57320  | up | 619.58685  | 119.86723  | 484.02880  | 93.32899   | Detected     | Detected     | Detected    | Detected    |
| 899 | A_24_P371628  | ANKH         | Hs.156727 | ankylosis, progressive homolog (mouse)                                       | Homo sapiens ankylosis, progressive homolog (mouse) (ANKH), mRNA [NM_054027]                                                               | 5.35150 | up | 5.74803  | up | 1970.51100 | 381.27368  | 1514.61200 | 232.35280  | Detected     | Detected     | Detected    | Detected    |
| 900 | A_24_P268993  | LEAP2        | Hs.337588 | liver expressed antimicrobial peptide 2                                      | Homo sapiens liver expressed antimicrobial peptide 2 (LEAP2), mRNA [NM_052971]                                                             | 5.32956 | up | 4.12800  | up | 222.54770  | 43.23792   | 150.37643  | 32.12225   | Detected     | Detected     | Detected    | Detected    |
| 901 | A_24_P678104  | STMN3        | Hs.639609 | stathmin-like 3                                                              | Homo sapiens stathmin-like 3 (STMN3), mRNA [NM_015894]                                                                                     | 5.32864 | up | 4.95670  | up | 957.99506  | 186.15714  | 914.94160  | 162.76710  | Detected     | Detected     | Detected    | Detected    |
| 902 | A_33_P3229818 | TBPL2        | Hs.528278 | TATA box binding protein like 2                                              | Homo sapiens TATA box binding protein like 2 (TBPL2), mRNA [NM_199047]                                                                     | 5.32736 | up | 3.25263  | up | 20.33875   | 3.95317    | 12.92671   | 3.50444    | Detected     | Compromised  | Compromised | Compromised |
| 903 | A_23_P407565  | CX3CR1       | Hs.78913  | chemokine (C-X3-C motif) receptor 1                                          | Homo sapiens chemokine (C-X3-C motif) receptor 1 (CX3CR1), mRNA [NM_001337]                                                                | 5.32588 | up | 2.51030  | up | 21.83493   | 4.24515    | 16.45748   | 5.78100    | Detected     | Compromised  | Compromised | Compromised |
| 904 | A_32_P108156  | MIR155HG     | Hs.697120 | MIR155 host gene (non-protein coding)                                        | Homo sapiens MIR155 host gene (non-protein coding) (MIR155HG), non-coding RNA [NR_001458]                                                  | 5.32586 | up | 5.51035  | up | 320.03870  | 62.22223   | 318.92530  | 51.03583   | Detected     | Detected     | Detected    | Detected    |
| 905 | A_32_P188825  | TDRD12       | Hs.646351 | tudor domain containing 12                                                   | Homo sapiens tudor domain containing 12 (TDRD12), mRNA [NM_001110822]                                                                      | 5.32431 | up | 2.78282  | up | 21.97001   | 4.27268    | 22.56587   | 7.15044    | Detected     | Compromised  | Detected    | Compromised |
| 906 | A_33_P3398597 | EPS8L1       | Hs.438862 | EPS8-like 1                                                                  | Homo sapiens EPS8-like 1 (EPS8L1), transcript variant 1, mRNA [NM_133180]                                                                  | 5.32371 | up | 7.34048  | up | 48.29141   | 9.39267    | 56.12793   | 6.74249    | Detected     | Compromised  | Detected    | Compromised |
| 907 | A_32_P66035   | TMEM86A      | Hs.502100 | transmembrane protein 86A                                                    | Homo sapiens transmembrane protein 86A (TMEM86A), mRNA [NM_153347]                                                                         | 5.32251 | up | 9.89532  | up | 47.58443   | 9.25724    | 36.57175   | 3.25898    | Detected     | Compromised  | Detected    | Compromised |
| 908 | A_33_P3363120 | SCARNA10     |           | small Cajal body-specific RNA 10                                             | Homo sapiens small Cajal body-specific RNA 10 (SCARNA10), guide RNA [NR_004387]                                                            | 5.31447 | up | 10.38952 | up | 95.02969   | 18.51537   | 64.32024   | 5.45905    | Detected     | Compromised  | Detected    | Compromised |
| 909 | A_23_P1119464 | RHPN2        | Hs.466435 | rhophilin, Rho GTPase binding protein 2                                      | Homo sapiens rhophilin, Rho GTPase binding protein 2 (RHPN2), mRNA [NM_033103]                                                             | 5.31437 | up | 3.25838  | up | 24.11280   | 4.69817    | 27.73145   | 7.50476    | Detected     | Compromised  | Detected    | Compromised |
| 910 | A_33_P3281985 | CR2          | Hs.445757 | complement component (3d/Epstein Barr virus) receptor 2                      | Homo sapiens complement component (3d/Epstein Barr virus) receptor 2 (CR2), transcript variant 1, mRNA [NM_001006658]                      | 5.31260 | up | 8.98688  | up | 55.89632   | 10.89455   | 27.37403   | 2.68593    | Detected     | Compromised  | Detected    | Compromised |
| 911 | A_33_P3383233 | NDRG2        | Hs.525205 | NDRG family member 2                                                         | Homo sapiens NDRG family member 2 (NDRG2), transcript variant 1, mRNA [NM_201535]                                                          | 5.31220 | up | 4.90125  | up | 534.21844  | 104.13041  | 450.45462  | 81.04186   | Detected     | Detected     | Detected    | Detected    |

|     |               |           |           |                                                                                         |                                                                                                                                              |         |    |         |    |              |             |              |             |          |             |             |             |
|-----|---------------|-----------|-----------|-----------------------------------------------------------------------------------------|----------------------------------------------------------------------------------------------------------------------------------------------|---------|----|---------|----|--------------|-------------|--------------|-------------|----------|-------------|-------------|-------------|
| 912 | A_23_P25503   | FNDC3A    | Hs.508010 | fibronectin type III domain containing 3A                                               | Homo sapiens fibronectin type III domain containing 3A (FNDC3A), transcript variant 1, mRNA [NM_001079673]                                   | 5.31211 | up | 5.21785 | up | 17337.04700  | 3379.41110  | 13145.40500  | 2221.50980  | Detected | Detected    | Detected    | Detected    |
| 913 | A_24_P49199   | GLDN      | Hs.526441 | gliomedin                                                                               | Homo sapiens gliomedin (GLDN), mRNA [NM_181789]                                                                                              | 5.31108 | up | 5.20489 | up | 2829.93600   | 551.73000   | 1863.59850   | 315.72330   | Detected | Detected    | Detected    | Detected    |
| 914 | A_33_P3284404 | SYNGR1    | Hs.216226 | synaptogyrin 1                                                                          | Homo sapiens synaptogyrin 1 (SYNGR1), transcript variant 1b, mRNA [NM_145731]                                                                | 5.31075 | up | 4.96814 | up | 1474.15540   | 287.42215   | 1682.16280   | 298.56552   | Detected | Detected    | Detected    | Detected    |
| 915 | A_23_P383679  | HYDIN     | Hs.461229 | hydrocephalus inducing homolog (mouse)                                                  | Homo sapiens hydrocephalus inducing homolog (mouse) (HYDIN), transcript variant 1, mRNA [NM_032821]                                          | 5.31027 | up | 5.59890 | up | 27.99303     | 5.45842     | 35.48910     | 5.58931     | Detected | Compromised | Detected    | Compromised |
| 916 | A_23_P212119  | GALNTL2   | Hs.411308 | UDP-N-acetyl-alpha-D-galactosamine:polypeptide N-acetylgalactosaminyltransferase-like 2 | Homo sapiens UDP-N-acetyl-alpha-D-galactosamine:polypeptide N-acetylgalactosaminyltransferase-like 2 (GALNTL2), mRNA [NM_054110]             | 5.30881 | up | 5.60146 | up | 7680.41260   | 1498.03120  | 6226.96240   | 980.25780   | Detected | Detected    | Detected    | Detected    |
| 917 | A_23_P433016  | FBLN1     | Hs.24601  | fibulin 1                                                                               | Homo sapiens fibulin 1 (FBLN1), transcript variant C, mRNA [NM_001936]                                                                       | 5.29900 | up | 4.13912 | up | 21080.49000  | 4119.26460  | 18950.06400  | 4037.08520  | Detected | Detected    | Detected    | Detected    |
| 918 | A_24_P82466   | GAS7      | Hs.462214 | growth arrest-specific 7                                                                | Homo sapiens growth arrest-specific 7 (GAS7), transcript variant c, mRNA [NM_201433]                                                         | 5.29619 | up | 7.49040 | up | 123.92180    | 24.22800    | 73.06556     | 8.60148     | Detected | Detected    | Detected    | Compromised |
| 919 | A_33_P3261530 |           |           |                                                                                         | Putative uncharacterized protein ENSG00000214546 [Source:UniProtKB/Swiss-Prot;Acc:ABMU10] [ENST00000398554]                                  | 5.29159 | up | 2.99535 | up | 15.11053     | 2.95684     | 9.23385      | 2.71832     | Detected | Compromised | Compromised | Compromised |
| 920 | A_23_P34744   | CTSK      | Hs.632466 | cathepsin K                                                                             | Homo sapiens cathepsin K (CTSK), mRNA [NM_000396]                                                                                            | 5.28199 | up | 5.04865 | up | 162622.66000 | 31879.86000 | 144722.05000 | 25276.95500 | Detected | Detected    | Detected    | Detected    |
| 921 | A_24_P242646  | CTSS      | Hs.181301 | cathepsin S                                                                             | Homo sapiens cathepsin S (CTSS), mRNA [NM_004079]                                                                                            | 5.26659 | up | 7.33458 | up | 29.42997     | 5.78620     | 24.75462     | 2.97609     | Detected | Compromised | Detected    | Compromised |
| 922 | A_23_P6651    | C3orf63   | Hs.116877 | chromosome 3 open reading frame 63                                                      | Homo sapiens chromosome 3 open reading frame 63 (C3orf63), transcript variant 2, mRNA [NM_015224]                                            | 5.26549 | up | 6.25166 | up | 932.78534    | 183.43243   | 707.00195    | 99.72189    | Detected | Detected    | Detected    | Detected    |
| 923 | A_33_P3861385 | PGM5P1    | Hs.650460 | phosphoglucomutase 5 pseudogene 1                                                       | Homo sapiens cDNA FLJ38840 fis, clone MESAN2003490 [AK096159]                                                                                | 5.26441 | up | 3.23065 | up | 20.53688     | 4.03941     | 12.81287     | 3.49722     | Detected | Compromised | Compromised | Compromised |
| 924 | A_23_P422786  | KLHDC1    | Hs.509258 | kelch domain containing 1                                                               | Homo sapiens kelch domain containing 1 (KLHDC1), mRNA [NM_172193]                                                                            | 5.26283 | up | 5.79761 | up | 288.49840    | 56.76197    | 198.51042    | 30.19255    | Detected | Detected    | Detected    | Detected    |
| 925 | A_33_P3300495 |           |           |                                                                                         | Plasminogen-related protein B Precursor [Source:UniProtKB/Swiss-Prot;Acc:Q02325] [ENST00000409310]                                           | 5.26227 | up | 4.52480 | up | 355.92218    | 70.03501    | 153.10292    | 29.83661    | Detected | Detected    | Detected    | Detected    |
| 926 | A_23_P73345   | MITF      | Hs.166017 | microphthalmia-associated transcription factor                                          | Homo sapiens microphthalmia-associated transcription factor (MITF), transcript variant 1, mRNA [NM_198159]                                   | 5.25993 | up | 9.88404 | up | 76.27582     | 15.01550    | 75.48770     | 6.73453     | Detected | Compromised | Detected    | Compromised |
| 927 | A_23_P337729  | TMEM180   | Hs.309069 | transmembrane protein 180                                                               | Homo sapiens transmembrane protein 180 (TMEM180), mRNA [NM_024789]                                                                           | 5.25724 | up | 4.69201 | up | 623.67960    | 122.83911   | 692.44214    | 130.13388   | Detected | Detected    | Detected    | Detected    |
| 928 | A_33_P3414912 | NPL       | Hs.496969 | N-acetylneuraminic pyruvate lyase (dihydrodipicolinate synthase)                        | Homo sapiens N-acetylneuraminic pyruvate lyase (dihydrodipicolinate synthase) (NPL), mRNA [NM_030769]                                        | 5.25488 | up | 3.42956 | up | 48.08538     | 9.47510     | 43.04340     | 11.06710    | Detected | Compromised | Detected    | Compromised |
| 929 | A_23_P50517   | ZNF541    | Hs.14161  | zinc finger protein 541                                                                 | Homo sapiens zinc finger protein 541 (ZNF541), mRNA [NM_001101419]                                                                           | 5.25365 | up | 3.45633 | up | 22.83933     | 4.50148     | 10.50694     | 2.68057     | Detected | Compromised | Compromised | Compromised |
| 930 | A_23_P384748  | PLEKH2    | Hs.164162 | pleckstrin homology domain containing, family H (with MYTH4 domain) member 2            | Homo sapiens pleckstrin homology domain containing, family H (with MYTH4 domain) member 2 (PLEKH2), mRNA [NM_172069]                         | 5.25306 | up | 5.27821 | up | 401.85756    | 79.17293    | 250.45103    | 41.84094    | Detected | Detected    | Detected    | Detected    |
| 931 | A_23_P422911  | HS6ST3    | Hs.171001 | heparan sulfate 6-O-sulfotransferase 3                                                  | Homo sapiens heparan sulfate 6-O-sulfotransferase 3 (HS6ST3), mRNA [NM_153456]                                                               | 5.24280 | up | 7.32828 | up | 100.11653    | 19.77315    | 62.11768     | 7.47444     | Detected | Detected    | Detected    | Compromised |
| 932 | A_23_P41114   | CSTA      | Hs.518198 | cystatin A (stefin A)                                                                   | Homo sapiens cystatin A (stefin A) (CSTA), mRNA [NM_005213]                                                                                  | 5.24028 | up | 3.77240 | up | 214.67030    | 42.41802    | 128.85059    | 30.11859    | Detected | Detected    | Detected    | Detected    |
| 933 | A_33_P3339011 | GOLGA2L1  | Hs.524660 | golgi autoantigen, golgin subfamily a, 2-like 1                                         | Homo sapiens golgi autoantigen, golgin subfamily a, 2-like 1 (GOLGA2L1), transcript variant 2, transcribed RNA [NR_024261]                   | 5.23925 | up | 5.33121 | up | 195.58221    | 38.65387    | 143.24832    | 23.69350    | Detected | Detected    | Detected    | Detected    |
| 934 | A_23_P120594  | ACSS1     | Hs.529353 | acyl-CoA synthetase short-chain family member 1                                         | Homo sapiens acyl-CoA synthetase short-chain family member 1 (ACSS1), nuclear gene encoding mitochondrial protein, mRNA [NM_032501]          | 5.23293 | up | 4.54798 | up | 783.54300    | 155.04270   | 575.39484    | 111.56105   | Detected | Detected    | Detected    | Detected    |
| 935 | A_23_P345460  | PLEKHG4   | Hs.188781 | pleckstrin homology domain containing, family G (with RhoGef domain) member 4           | Homo sapiens pleckstrin homology domain containing, family G (with RhoGef domain) member 4 (PLEKHG4), transcript variant 1, mRNA [NM_015432] | 5.23132 | up | 4.88301 | up | 5489.18260   | 1086.49900  | 2597.03440   | 468.98093   | Detected | Detected    | Detected    | Detected    |
| 936 | A_33_P3322115 | LOC728800 |           | similar to FLJ00402 protein                                                             | PREDICTED: Homo sapiens hypothetical LOC728800 (LOC728800), mRNA [XM_001715974]                                                              | 5.22946 | up | 3.35888 | up | 14.86533     | 2.94341     | 9.21653      | 2.41957     | Detected | Compromised | Compromised | Compromised |
| 937 | A_23_P30098   | ADH4      | Hs.1219   | alcohol dehydrogenase 4 (class II), pi polypeptide                                      | Homo sapiens alcohol dehydrogenase 4 (class II), pi polypeptide (ADH4), mRNA [NM_000670]                                                     | 5.22574 | up | 4.56657 | up | 16.78831     | 3.32654     | 14.34894     | 2.77073     | Detected | Compromised | Detected    | Compromised |
| 938 | A_23_P146849  | APBA2     | Hs.618112 | amyloid beta (A4) precursor protein-binding, family A, member 2                         | Homo sapiens amyloid beta (A4) precursor protein-binding, family A, member 2 (APBA2), transcript variant 1, mRNA [NM_005593]                 | 5.22560 | up | 8.01534 | up | 101.93027    | 20.19760    | 83.10006     | 9.14209     | Detected | Detected    | Detected    | Compromised |
| 939 | A_23_P92042   | ITPR1     | Hs.567295 | inositol 1,4,5-triphosphate receptor, type 1                                            | Homo sapiens inositol 1,4,5-triphosphate receptor, type 1 (ITPR1), transcript variant 2, mRNA [NM_002222]                                    | 5.22509 | up | 4.96950 | up | 470.72705    | 93.28436    | 436.75528    | 77.49809    | Detected | Detected    | Detected    | Detected    |
| 940 | A_33_P3390773 | TRIM66    | Hs.130836 | tripartite motif-containing 66                                                          | Homo sapiens tripartite motif-containing 66 (TRIM66), mRNA [NM_014818]                                                                       | 5.22028 | up | 7.00544 | up | 355.77423    | 70.56895    | 194.62930    | 24.49843    | Detected | Detected    | Detected    | Detected    |

|     |                |              |           |                                                                      |                                                                                                                             |         |    |          |    |             |            |             |            |          |             |             |              |
|-----|----------------|--------------|-----------|----------------------------------------------------------------------|-----------------------------------------------------------------------------------------------------------------------------|---------|----|----------|----|-------------|------------|-------------|------------|----------|-------------|-------------|--------------|
| 941 | A_32_P83811    | FAM47E       | Hs.720509 | family with sequence similarity 47, member E                         | Homo sapiens family with sequence similarity 47, member E (FAM47E), mRNA [NM_001136570]                                     | 5.21885 | up | 4.81702  | up | 15.27917    | 3.03151    | 13.82513    | 2.53079    | Detected | Compromised | Detected    | Compromised  |
| 942 | A_33_P3414107  | LOC729040    | Hs.678658 | hypothetical LOC729040                                               | PREDICTED: Homo sapiens hypothetical LOC729040 (LOC729040), miscRNA [XR_078317]                                             | 5.21386 | up | 2.61004  | up | 53.62075    | 10.64894   | 47.26759    | 15.96916   | Detected | Compromised | Detected    | Detected     |
| 943 | A_23_P501007   | EFEMP1       | Hs.76224  | EGF-containing fibulin-like extracellular matrix protein 1           | Homo sapiens EGF-containing fibulin-like extracellular matrix protein 1 (EFEMP1), transcript variant 1, mRNA [NM_004105]    | 5.21251 | up | 5.18391  | up | 25235.10000 | 5012.92900 | 19172.07600 | 3261.20040 | Detected | Detected    | Detected    | Detected     |
| 944 | A_33_P3336562  | LOC100132701 | Hs.132394 | hypothetical LOC100132701                                            | PREDICTED: Homo sapiens hypothetical LOC100132701 (LOC100132701), mRNA [XM_001715461]                                       | 5.20610 | up | 6.81002  | up | 370.88160   | 73.76598   | 309.49048   | 40.07418   | Detected | Detected    | Detected    | Detected     |
| 945 | A_33_P3220822  | LOC441687    | Hs.685242 | similar to testis expressed gene 21                                  | PREDICTED: Homo sapiens similar to testis expressed gene 21 (LOC441687), mRNA [XM_001717077]                                | 5.20023 | up | 3.90127  | up | 100.22500   | 19.95661   | 79.45029    | 17.95789   | Detected | Detected    | Detected    | Detected     |
| 946 | A_23_P97283    | PAQR6        | Hs.235873 | progesterin and adipoQ receptor family member VI                     | Homo sapiens progesterin and adipoQ receptor family member VI (PAQR6), transcript variant 1, mRNA [NM_024897]               | 5.19998 | up | 5.31183  | up | 1708.25320  | 340.16060  | 1398.29350  | 232.12390  | Detected | Detected    | Detected    | Detected     |
| 947 | A_23_P210109   | CYP26B1      | Hs.91546  | cytochrome P450, family 26, subfamily B, polypeptide 1               | Homo sapiens cytochrome P450, family 26, subfamily B, polypeptide 1 (CYP26B1), mRNA [NM_019885]                             | 5.19271 | up | 2.45685  | up | 16.69956    | 3.33000    | 11.42504    | 4.10058    | Detected | Compromised | Compromised | Compromised  |
| 948 | A_33_P3353471  | NCRNA00110   |           | non-protein coding RNA 110                                           | Homo sapiens non-protein coding RNA 110 (NCRNA00110), non-coding RNA [NR_027021]                                            | 5.18880 | up | 14.31691 | up | 99.17326    | 19.79068   | 73.17088    | 4.50666    | Detected | Detected    | Detected    | Compromised  |
| 949 | A_23_P77000    | VASH1        | Hs.525479 | vasohibin 1                                                          | Homo sapiens vasohibin 1 (VASH1), mRNA [NM_014509]                                                                          | 5.18857 | up | 5.23342  | up | 1781.85220  | 355.59600  | 1720.44460  | 289.88130  | Detected | Detected    | Detected    | Detected     |
| 950 | A_23_P130677   | LOC55908     | Hs.534467 | hepatocellular carcinoma-associated gene TD26                        | Homo sapiens hepatocellular carcinoma-associated gene TD26 (LOC55908), mRNA [NM_018887]                                     | 5.18578 | up | 13.19516 | up | 85.62395    | 17.09679   | 108.47509   | 7.24905    | Detected | Detected    | Detected    | Compromised  |
| 951 | A_33_P3322814  | NTRK3        | Hs.410969 | neurotrophic tyrosine kinase, receptor, type 3                       | Homo sapiens neurotrophic tyrosine kinase, receptor, type 3 (NTRK3), transcript variant 3, mRNA [NM_001007156]              | 5.18520 | up | 5.11359  | up | 287.61640   | 57.43557   | 213.15840   | 36.75718   | Detected | Detected    | Detected    | Detected     |
| 952 | A_33_P3245178  | BEX2         | Hs.398989 | brain expressed X-linked 2                                           | Homo sapiens brain expressed X-linked 2 (BEX2), mRNA [NM_032621]                                                            | 5.18012 | up | 5.88545  | up | 1429.86650  | 285.81757  | 1146.21240  | 171.73200  | Detected | Detected    | Detected    | Detected     |
| 953 | A_32_P189781   | C14orf34     |           | chromosome 14 open reading frame 34                                  | Homo sapiens chromosome 14 open reading frame 34 (C14orf34), transcript variant 1, non-coding RNA [NR_026796]               | 5.17909 | up | 5.51170  | up | 279.14950   | 55.81053   | 154.39142   | 24.70036   | Detected | Detected    | Detected    | Detected     |
| 954 | A_23_P118042   | LRRC36       | Hs.125139 | leucine rich repeat containing 36                                    | Homo sapiens leucine rich repeat containing 36 (LRRC36), transcript variant 1, mRNA [NM_018296]                             | 5.17889 | up | 3.73944  | up | 104.36546   | 20.86667   | 84.64722    | 19.96049   | Detected | Detected    | Detected    | Not Detected |
| 955 | A_33_P3269650  | LOC100128402 | Hs.689574 | hypothetical protein LOC100128402                                    | Homo sapiens cDNA FLJ42583 fis, clone BRACE300909, [AK124574]                                                               | 5.17110 | up | 2.51513  | up | 44.45732    | 8.90212    | 20.54203    | 7.20193    | Detected | Compromised | Detected    | Compromised  |
| 956 | A_23_P415611   | NHEDC1       | Hs.666728 | Na <sup>+</sup> /H <sup>+</sup> exchanger domain containing 1        | Homo sapiens Na <sup>+</sup> /H <sup>+</sup> exchanger domain containing 1 (NHEDC1), transcript variant 1, mRNA [NM_139173] | 5.16976 | up | 3.71998  | up | 51.62310    | 10.33967   | 46.39995    | 10.99874   | Detected | Compromised | Detected    | Compromised  |
| 957 | A_33_P3394272  | C6orf176     |           | chromosome 6 open reading frame 176                                  | Homo sapiens chromosome 6 open reading frame 176 (C6orf176), transcript variant 2, non-coding RNA [NR_026861]               | 5.16554 | up | 2.34725  | up | 17.97071    | 3.60232    | 8.32217     | 3.12638    | Detected | Compromised | Compromised | Compromised  |
| 958 | A_32_P227605   | RGS9BP       | Hs.528491 | regulator of G protein signaling 9 binding protein                   | Homo sapiens regulator of G protein signaling 9 binding protein (RGS9BP), mRNA [NM_207391]                                  | 5.16512 | up | 5.73688  | up | 61.75375    | 12.37988   | 68.15114    | 10.47522   | Detected | Compromised | Detected    | Compromised  |
| 959 | A_33_P3210556  | FLJ42289     | Hs.136982 | hypothetical LOC388182                                               | Homo sapiens hypothetical LOC388182 (FLJ42289), transcript variant 1, non-coding RNA [NR_028139]                            | 5.16464 | up | 7.76636  | up | 36.25965    | 7.26970    | 33.01471    | 3.74848    | Detected | Compromised | Detected    | Compromised  |
| 960 | A_33_P3414389  | SH2B2        | Hs.489448 | SH2B adaptor protein 2                                               | Homo sapiens SH2B adaptor protein 2 (SH2B2), mRNA [NM_020979]                                                               | 5.16325 | up | 4.65553  | up | 3480.98700  | 698.09190  | 3191.83450  | 604.55664  | Detected | Detected    | Detected    | Detected     |
| 961 | A_23_P160720   | BATF3        | Hs.62919  | basic leucine zipper transcription factor, ATF-like 3                | Homo sapiens basic leucine zipper transcription factor, ATF-like 3 (BATF3), mRNA [NM_018664]                                | 5.15968 | up | 4.96409  | up | 1406.03020  | 282.16610  | 1440.00260  | 255.79346  | Detected | Detected    | Detected    | Detected     |
| 962 | A_33_P3402404  | SCN3B        | Hs.4865   | sodium channel, voltage-gated, type III, beta                        | Homo sapiens sodium channel, voltage-gated, type III, beta (SCN3B), transcript variant 1, mRNA [NM_018400]                  | 5.15948 | up | 2.64678  | up | 17.51334    | 3.51476    | 8.88044     | 2.95857    | Detected | Compromised | Compromised | Compromised  |
| 963 | A_33_P3331125  | SLC2A12      | Hs.486508 | solute carrier family 2 (facilitated glucose transporter), member 12 | Homo sapiens solute carrier family 2 (facilitated glucose transporter), member 12 (SLC2A12), mRNA [NM_145176]               | 5.15906 | up | 2.45152  | up | 16.06225    | 3.22381    | 7.60245     | 2.73454    | Detected | Compromised | Compromised | Compromised  |
| 964 | A_33_P33246833 | IL1RN        | Hs.81134  | interleukin 1 receptor antagonist                                    | Homo sapiens interleukin 1 receptor antagonist (IL1RN), transcript variant 1, mRNA [NM_173842]                              | 5.15845 | up | 4.99084  | up | 15056.78500 | 3022.36160 | 13401.92500 | 2367.87670 | Detected | Detected    | Detected    | Detected     |
| 965 | A_23_P160004   | UTY          | Hs.115277 | ubiquitously transcribed tetratricopeptide repeat gene, Y-linked     | Homo sapiens ubiquitously transcribed tetratricopeptide repeat gene, Y-linked (UTY), transcript variant 1, mRNA [NM_132950] | 5.14406 | up | 4.81160  | up | 17.99259    | 3.62177    | 16.44621    | 3.01399    | Detected | Compromised | Detected    | Compromised  |
| 966 | A_33_P3232861  | LOC728558    | Hs.538374 | hypothetical LOC728558                                               | PREDICTED: Homo sapiens hypothetical LOC728558 (LOC728558), mRNA [XM_001130206]                                             | 5.14329 | up | 2.49954  | up | 16.42915    | 3.30755    | 7.85209     | 2.77007    | Detected | Compromised | Compromised | Compromised  |
| 967 | A_32_P183970   | C15orf62     | Hs.631715 | chromosome 15 open reading frame 62                                  | Homo sapiens chromosome 15 open reading frame 62 (C15orf62), mRNA [NM_001130448]                                            | 5.13973 | up | 2.39361  | up | 16.14035    | 3.25167    | 16.50773    | 6.08134    | Detected | Compromised | Detected    | Compromised  |
| 968 | A_23_P128084   | ITGA7        | Hs.524484 | integrin, alpha 7                                                    | Homo sapiens integrin, alpha 7 (ITGA7), transcript variant 2, mRNA [NM_002206]                                              | 5.13459 | up | 5.01097  | up | 9235.27000  | 1862.41870 | 11556.64600 | 2033.64880 | Detected | Detected    | Detected    | Detected     |
| 969 | A_33_P3413483  | SORD         | Hs.633539 | sorbitol dehydrogenase                                               | Homo sapiens cDNA FLJ33419 fis, clone BRACE201987 [AK090738]                                                                | 5.13335 | up | 5.39830  | up | 762.24854   | 153.75491  | 459.68338   | 75.08749   | Detected | Detected    | Detected    | Detected     |



|      |               |            |           |                                                                                         |                                                                                                                                                                                                          |         |    |          |    |             |            |             |            |          |             |             |             |
|------|---------------|------------|-----------|-----------------------------------------------------------------------------------------|----------------------------------------------------------------------------------------------------------------------------------------------------------------------------------------------------------|---------|----|----------|----|-------------|------------|-------------|------------|----------|-------------|-------------|-------------|
| 970  | A_32_P313405  | LAMA1      | Hs.270364 | laminin, alpha 1                                                                        | Homo sapiens laminin, alpha 1 (LAMA1), mRNA [NM_005559]                                                                                                                                                  | 5.13223 | up | 4.70291  | up | 1416.44190  | 285.77600  | 868.29300   | 162.80391  | Detected | Detected    | Detected    | Detected    |
| 971  | A_33_P3221925 | C6orf170   | Hs.121396 | chromosome 6 open reading frame 170                                                     | Homo sapiens chromosome 6 open reading frame 170 (C6orf170), mRNA [NM_152730]                                                                                                                            | 5.13187 | up | 1.10187  | up | 34.94195    | 7.05025    | 15.48297    | 12.39049   | Detected | Compromised | Detected    | Compromised |
| 972  | A_33_P3276364 |            | Hs.492925 |                                                                                         | 3-keto-steroid reductase (EC 1.1.1.270)(Estradiol 17-beta-dehydrogenase 7)(EC 1.1.1.82)(17-beta-hydroxysteroid dehydrogenase 7)(17-beta-HSD 7) [Source:UniProtKB/Swiss-ProtAcc:P56937] [ENST00000367913] | 5.13167 | up | 10.07742 | up | 34.33613    | 6.92828    | 30.28444    | 2.64994    | Detected | Compromised | Detected    | Compromised |
| 973  | A_23_P88278   | RPGRP1     | Hs.126035 | retinitis pigmentosa GTPase regulator interacting protein 1                             | Homo sapiens retinitis pigmentosa GTPase regulator interacting protein 1 (RPGRP1), mRNA [NM_020366]                                                                                                      | 5.11678 | up | 5.24105  | up | 16.46728    | 3.33241    | 16.91269    | 2.84551    | Detected | Compromised | Detected    | Compromised |
| 974  | A_24_P595237  | TMEM90A    | Hs.12400  | transmembrane protein 90A                                                               | Homo sapiens transmembrane protein 90A (TMEM90A), mRNA [NM_001105579]                                                                                                                                    | 5.11476 | up | 2.54073  | up | 16.55605    | 3.35170    | 8.09341     | 2.80892    | Detected | Compromised | Compromised | Compromised |
| 975  | A_33_P3378634 |            |           |                                                                                         |                                                                                                                                                                                                          | 5.11391 | up | 5.2070   | up | 34.05927    | 6.89628    | 29.58238    | 4.72503    | Detected | Compromised | Detected    | Compromised |
| 976  | A_33_P3434239 | FLJ37638   | Hs.131718 | hypothetical gene supported by AK094857                                                 | Homo sapiens cDNA FLJ37638 fis. clone BRHIP1000058 [AK094857]                                                                                                                                            | 5.11265 | up | 2.87334  | up | 16.76293    | 3.39498    | 9.26654     | 2.84378    | Detected | Compromised | Compromised | Compromised |
| 977  | A_24_P110141  | C15orf51   | Hs.567763 | dynamin 1 pseudogene                                                                    | Homo sapiens chromosome 15 open reading frame 51 (C15orf51), non-coding RNA [NR_003260]                                                                                                                  | 5.10584 | up | 4.39807  | up | 121.87061   | 24.71523   | 120.24781   | 24.10910   | Detected | Detected    | Detected    | Detected    |
| 978  | A_23_P156390  | JAKMIP2    | Hs.184323 | janus kinase and microtubule interacting protein 2                                      | Homo sapiens janus kinase and microtubule interacting protein 2 (JAKMIP2), mRNA [NM_014790]                                                                                                              | 5.10560 | up | 3.98764  | up | 14.94080    | 3.03012    | 13.27854    | 2.93630    | Detected | Compromised | Detected    | Compromised |
| 979  | A_33_P3295523 | RAC3       | Hs.45002  | ras-related G3 botulinum toxin substrate 3 (rho family, small GTP binding protein Rac3) | Homo sapiens ras-related G3 botulinum toxin substrate 3 (rho family, small GTP binding protein Rac3) (RAC3), mRNA [NM_005052]                                                                            | 5.10508 | up | 5.02369  | up | 11400.10800 | 2312.27370 | 11214.11900 | 1968.37460 | Detected | Detected    | Detected    | Detected    |
| 980  | A_33_P3244803 | ACOX1      | Hs.464137 | acyl-Coenzyme A oxidase 1, palmitoyl                                                    | Homo sapiens acyl-Coenzyme A oxidase 1, palmitoyl (ACOX1), transcript variant 1, mRNA [NM_004035]                                                                                                        | 5.10499 | up | 3.85315  | up | 9369.03400  | 1900.34670 | 7639.90400  | 1748.38670 | Detected | Detected    | Detected    | Detected    |
| 981  | A_24_P73577   | ALDH1A2    | Hs.643455 | aldehyde dehydrogenase 1 family, member A2                                              | Homo sapiens aldehyde dehydrogenase 1 family, member A2 (ALDH1A2), transcript variant 3, mRNA [NM_170697]                                                                                                | 5.10186 | up | 2.99748  | up | 18.49955    | 3.75462    | 10.58465    | 3.11377    | Detected | Compromised | Compromised | Compromised |
| 982  | A_24_P696761  | LEMD1      | Hs.655520 | LEM domain containing 1                                                                 | Homo sapiens LEM domain containing 1 (LEMD1), mRNA [NM_00103532]                                                                                                                                         | 5.09883 | up | 4.15287  | up | 29.16211    | 5.92217    | 26.10342    | 5.54261    | Detected | Compromised | Detected    | Compromised |
| 983  | A_33_P3319625 | NFIA       | Hs.191911 | nuclear factor I/A                                                                      | Homo sapiens nuclear factor I/A (NFIA), transcript variant 1, mRNA [NM_001134673]                                                                                                                        | 5.09397 | up | 2.36740  | up | 51.04963    | 10.37695   | 53.51714    | 19.93367   | Detected | Compromised | Detected    | Detected    |
| 984  | A_24_P16559   | FOXP2      | Hs.656280 | forkhead box P2                                                                         | Homo sapiens forkhead box P2 (FOXP2), transcript variant 2, mRNA [NM_148898]                                                                                                                             | 5.09006 | up | 2.39104  | up | 18.74792    | 3.81385    | 8.85488     | 3.26559    | Detected | Compromised | Compromised | Compromised |
| 985  | A_33_P3357858 | ZNF815     | Hs.372707 | zinc finger protein 815                                                                 | Homo sapiens zinc finger protein 815 (ZNF815), non-coding RNA [NR_023382]                                                                                                                                | 5.08797 | up | 5.11472  | up | 346.89000   | 70.59599   | 210.83147   | 36.34790   | Detected | Detected    | Detected    | Detected    |
| 986  | A_23_P397543  | NCRNA00174 | Hs.50795  | non-protein coding RNA 174                                                              | Homo sapiens non-protein coding RNA 174 (NCRNA00174), non-coding RNA [NR_026873]                                                                                                                         | 5.08590 | up | 3.24241  | up | 118.46078   | 24.11794   | 60.70594    | 16.50932   | Detected | Detected    | Detected    | Detected    |
| 987  | A_33_P3247988 | PCSK4      | Hs.46884  | proprotein convertase subtilisin/kexin type 4                                           | Homo sapiens proprotein convertase subtilisin/kexin type 4 (PCSK4), mRNA [NM_017573]                                                                                                                     | 5.07671 | up | 7.70736  | up | 1169.35850  | 238.50572  | 1092.87670  | 125.03481  | Detected | Detected    | Detected    | Detected    |
| 988  | A_33_P3311917 |            |           |                                                                                         |                                                                                                                                                                                                          | 5.06854 | up | 5.16130  | up | 202.12732   | 41.29287   | 151.32675   | 25.85368   | Detected | Detected    | Detected    | Detected    |
| 989  | A_33_P3651948 | NEO1       | Hs.388613 | neogenin homolog 1 (chicken)                                                            | Homo sapiens neogenin homolog 1 (chicken) (NEO1), mRNA [NM_002499]                                                                                                                                       | 5.06713 | up | 12.46270 | up | 142.04532   | 29.02674   | 142.29526   | 10.06801   | Detected | Detected    | Detected    | Compromised |
| 990  | A_33_P3295991 | FLJ25694   |           | hypothetical protein FLJ25694                                                           | Homo sapiens cDNA FLJ46084 fis. clone TEST2006543 [AK127969]                                                                                                                                             | 5.06549 | up | 2.68774  | up | 25.64085    | 5.24137    | 17.85759    | 5.85869    | Detected | Compromised | Detected    | Compromised |
| 991  | A_24_P419276  | ZNF248     | Hs.528423 | zinc finger protein 248                                                                 | Homo sapiens zinc finger protein 248 (ZNF248), mRNA [NM_021045]                                                                                                                                          | 5.06483 | up | 2.45627  | up | 23.86897    | 4.87980    | 8.46436     | 3.03867    | Detected | Compromised | Compromised | Compromised |
| 992  | A_24_P75157   | TCP10      | Hs.351    | t-complex 10 homolog (mouse)                                                            | Homo sapiens t-complex 10 homolog (mouse) (TCP10), mRNA [NM_004610]                                                                                                                                      | 5.06196 | up | 4.85396  | up | 51.12970    | 10.45894   | 33.88594    | 6.15587    | Detected | Compromised | Detected    | Compromised |
| 993  | A_23_P156687  | CFB        | Hs.69771  | complement factor B                                                                     | Homo sapiens complement factor B (CFB), mRNA [NM_00101710]                                                                                                                                               | 5.05489 | up | 4.16677  | up | 294.11030   | 60.24644   | 242.97676   | 51.41982   | Detected | Detected    | Detected    | Detected    |
| 994  | A_33_P3351101 | TYSND1     | Hs.720071 | trypsin domain containing 1                                                             | Homo sapiens trypsin domain containing 1 (TYSND1), transcript variant 1, mRNA [NM_173555]                                                                                                                | 5.05093 | up | 6.50208  | up | 246.82085   | 50.59920   | 234.55255   | 31.80925   | Detected | Detected    | Detected    | Detected    |
| 995  | A_33_P3420204 | CRTC1      | Hs.371096 | CREB regulated transcription coactivator 1                                              | Homo sapiens CREB regulated transcription coactivator 1 (CRTC1), transcript variant 3, mRNA [NM_001098482]                                                                                               | 5.05061 | up | 4.48363  | up | 4634.88570  | 950.22986  | 3083.12280  | 606.35450  | Detected | Detected    | Detected    | Detected    |
| 996  | A_24_P64167   | PTGS1      | Hs.201978 | prostaglandin-endoperoxide synthase 1 (prostaglandin G/H synthase and cyclooxygenase)   | Homo sapiens prostaglandin-endoperoxide synthase 1 (prostaglandin G/H synthase and cyclooxygenase) (PTGS1), transcript variant 1, mRNA [NM_000962]                                                       | 5.04041 | up | 4.53811  | up | 32750.52300 | 6727.98900 | 25833.26600 | 5019.61100 | Detected | Detected    | Detected    | Detected    |
| 997  | A_23_P406986  | MOSPD2     | Hs.190043 | motile sperm domain containing 2                                                        | Homo sapiens motile sperm domain containing 2 (MOSPD2), mRNA [NM_152931]                                                                                                                                 | 5.03975 | up | 5.08370  | up | 761.24646   | 156.40466  | 501.17200   | 86.93050   | Detected | Detected    | Detected    | Detected    |
| 998  | A_23_P217379  | COL4A6     | Hs.145586 | collagen, type IV, alpha 6                                                              | Homo sapiens collagen, type IV, alpha 6 (COL4A6), transcript variant B, mRNA [NM_033641]                                                                                                                 | 5.03439 | up | 3.68731  | up | 32.31705    | 6.64689    | 14.02160    | 3.35315    | Detected | Compromised | Compromised | Compromised |
| 999  | A_24_P865226  | LOC440356  | Hs.448823 | hypothetical LOC440356                                                                  | Homo sapiens hypothetical LOC440356 (LOC440356), transcript variant 1, non-coding RNA [NR_015396]                                                                                                        | 5.03195 | up | 5.38969  | up | 69.95384    | 14.39489   | 88.38527    | 14.46046   | Detected | Compromised | Detected    | Detected    |
| 1000 | A_33_P3357591 | ATHL1      | Hs.353181 | ATH1, acid trehalase-like 1 (yeast)                                                     | Homo sapiens ATH1, acid trehalase-like 1 (yeast) (ATHL1), mRNA [NM_025092]                                                                                                                               | 5.03186 | up | 3.92812  | up | 30.21907    | 6.21850    | 34.57362    | 7.76114    | Detected | Compromised | Detected    | Compromised |

|      |               |           |           |                                                                                              |                                                                                                                                                             |         |    |          |    |             |             |             |            |          |             |             |             |
|------|---------------|-----------|-----------|----------------------------------------------------------------------------------------------|-------------------------------------------------------------------------------------------------------------------------------------------------------------|---------|----|----------|----|-------------|-------------|-------------|------------|----------|-------------|-------------|-------------|
| 1001 | A_23_P212126  | COLQ      | Hs.146735 | collagen-like tail subunit (single strand of homotrimer) of asymmetric acetylcholinesterase  | Homo sapiens collagen-like tail subunit (single strand of homotrimer) of asymmetric acetylcholinesterase (COLQ), transcript variant II, mRNA [NM_080538]    | 5.03006 | up | 5.99511  | up | 76.34126    | 15.71519    | 58.37831    | 8.58658    | Detected | Detected    | Detected    | Compromised |
| 1002 | A_23_P348749  | AKD1      | Hs.205144 | adenylate kinase domain containing 1                                                         | Homo sapiens adenylate kinase domain containing 1 (AKD1), transcript variant 2, mRNA [NM_145025]                                                            | 5.02899 | up | 5.50079  | up | 71.85540    | 14.79488    | 62.75016    | 10.05901   | Detected | Compromised | Detected    | Compromised |
| 1003 | A_33_P3423874 | GCOM1     | Hs.437256 | GRINL1A complex locus                                                                        | Homo sapiens GRINL1A complex locus (GCOM1), transcript variant 12, mRNA [NM_001018100]                                                                      | 5.02462 | up | 5.26506  | up | 366.86996   | 75.60349    | 283.71643   | 47.51673   | Detected | Detected    | Detected    | Detected    |
| 1004 | A_24_P940086  | NXP3      | Hs.55069  | neurexophilin 3                                                                              | Homo sapiens neurexophilin 3 (NXP3), mRNA [NM_007225]                                                                                                       | 5.01687 | up | 4.14141  | up | 187.19920   | 38.63708    | 184.58086   | 39.30105   | Detected | Detected    | Detected    | Detected    |
| 1005 | A_23_P383118  | ZSWIM5    | Hs.656613 | zinc finger, SWIM-type containing 5                                                          | Homo sapiens zinc finger, SWIM-type containing 5 (ZSWIM5), mRNA [NM_020883]                                                                                 | 5.00723 | up | 8.27769  | up | 140.61896   | 29.07901    | 106.45200   | 11.33992   | Detected | Detected    | Detected    | Compromised |
| 1006 | A_23_P201687  |           |           |                                                                                              | Transcription factor HES-2 (Hairy and enhancer of split 2) [Source:UniProtKB/Swiss-Prot;Acc:G9Y543] [ENST00000377836]                                       | 5.00692 | up | 3.50056  | up | 15.40227    | 3.18528     | 17.51439    | 4.41188    | Detected | Compromised | Detected    | Compromised |
| 1007 | A_32_P129752  | TMEM30B   | Hs.146180 | transmembrane protein 30B                                                                    | Homo sapiens transmembrane protein 30B (TMEM30B), mRNA [NM_001017970]                                                                                       | 5.00307 | up | 4.60998  | up | 182.10304   | 37.68894    | 89.49455    | 17.11839   | Detected | Detected    | Detected    | Compromised |
| 1008 | A_33_P3300747 | ADHFE1    | Hs.720023 | alcohol dehydrogenase, iron containing, 1                                                    | Homo sapiens alcohol dehydrogenase, iron containing, 1 (ADHFE1), nuclear gene encoding mitochondrial protein, mRNA [NM_144650]                              | 5.00286 | up | 5.94647  | up | 18.83893    | 3.89916     | 18.65873    | 2.76687    | Detected | Compromised | Detected    | Compromised |
| 1009 | A_23_P137248  | PRKY      | Hs.632287 | protein kinase, Y-linked                                                                     | Homo sapiens protein kinase, Y-linked (PRKY), non-coding RNA [NR_028062]                                                                                    | 4.99645 | up | 5.12049  | up | 601.05920   | 124.56294   | 412.87408   | 71.10033   | Detected | Detected    | Detected    | Detected    |
| 1010 | A_23_P201181  | PTPN22    | Hs.535276 | protein tyrosine phosphatase, non-receptor type 22 (lymphoid)                                | Homo sapiens protein tyrosine phosphatase, non-receptor type 22 (lymphoid) (PTPN22), transcript variant 2, mRNA [NM_012411]                                 | 4.99318 | up | 2.48461  | up | 70.96196    | 14.71572    | 49.29162    | 17.49363   | Detected | Compromised | Detected    | Detected    |
| 1011 | A_33_P3372099 | DDIT4L    | Hs.480378 | DNA-damage-inducible transcript 4-like                                                       | Homo sapiens DNA-damage-inducible transcript 4-like (DDIT4L), mRNA [NM_145244]                                                                              | 4.99283 | up | 5.46561  | up | 2207.59100  | 457.83112   | 1506.00900  | 242.97113  | Detected | Detected    | Detected    | Detected    |
| 1012 | A_24_P6517    | PLEKHG1   | Hs.189781 | pleckstrin homology domain containing, family G (with RhoGef domain) member 1                | Homo sapiens pleckstrin homology domain containing, family G (with RhoGef domain) member 1 (PLEKHG1), mRNA [NM_001029884]                                   | 4.98781 | up | 5.91685  | up | 30.57878    | 6.34810     | 18.39860    | 2.74195    | Detected | Compromised | Detected    | Compromised |
| 1013 | A_33_P3748410 | LOC654841 | Hs.659982 | hypothetical LOC654841                                                                       | Homo sapiens cDNA clone IMAGE:5265552 [BC039052]                                                                                                            | 4.98763 | up | 2.11653  | up | 57.91830    | 12.02417    | 26.76186    | 11.14953   | Detected | Compromised | Detected    | Compromised |
| 1014 | A_23_P130359  | ARHGAP28  | Hs.183114 | Rho GTPase activating protein 28                                                             | Homo sapiens Rho GTPase activating protein 28 (ARHGAP28), transcript variant 2, mRNA [NM_030672]                                                            | 4.98375 | up | 2.05344  | up | 14.77368    | 3.06949     | 5.99593     | 2.57478    | Detected | Compromised | Compromised | Compromised |
| 1015 | A_33_P3215635 | CHRN2     | Hs.2306   | cholinergic receptor, nicotinic, beta 2 (neuronal)                                           | Homo sapiens cholinergic receptor, nicotinic, beta 2 (neuronal) (CHRN2), mRNA [NM_000748]                                                                   | 4.98041 | up | 2.40634  | up | 18.44157    | 3.83412     | 15.58569    | 5.71129    | Detected | Compromised | Detected    | Compromised |
| 1016 | A_24_P408047  | PLEKHA4   | Hs.9469   | pleckstrin homology domain containing, family A (phosphoinositide binding specific) member 4 | Homo sapiens pleckstrin homology domain containing, family A (phosphoinositide binding specific) member 4 (PLEKHA4), transcript variant 1, mRNA [NM_020904] | 4.97959 | up | 4.71008  | up | 32617.67400 | 6782.54740  | 23390.27700 | 4378.98050 | Detected | Detected    | Detected    | Detected    |
| 1017 | A_23_P144807  | SEPT8     | Hs.522057 | septin 8                                                                                     | Homo sapiens septin 8 (SEPT8), transcript variant 1, mRNA [NM_001098811]                                                                                    | 4.97926 | up | 3.92878  | up | 614.05994   | 127.69660   | 509.69327   | 114.39742  | Detected | Detected    | Detected    | Detected    |
| 1018 | A_24_P498854  | LOC284998 | Hs.410180 | hypothetical protein LOC284998                                                               | Homo sapiens cDNA FLJ39302 fis, clone OCBBF2012990 [AK096621]                                                                                               | 4.96440 | up | 5.02519  | up | 51.75044    | 10.79395    | 43.14697    | 7.57117    | Detected | Compromised | Detected    | Compromised |
| 1019 | A_33_P3263902 | MX1       | Hs.501023 | MAX interactor 1                                                                             | Homo sapiens MAX interactor 1 (MX1), transcript variant 1, mRNA [NM_005982]                                                                                 | 4.96365 | up | 5.16837  | up | 68.63699    | 14.31826    | 85.42926    | 14.57533   | Detected | Compromised | Detected    | Detected    |
| 1020 | A_23_P149529  | TACSTD2   | Hs.23582  | tumor-associated calcium signal transducer 2                                                 | Homo sapiens tumor-associated calcium signal transducer 2 (TACSTD2), mRNA [NM_002353]                                                                       | 4.96109 | up | 4.78280  | up | 615.56080   | 128.47751   | 409.90692   | 75.57325   | Detected | Detected    | Detected    | Detected    |
| 1021 | A_23_P218358  | FBXW10    | Hs.592128 | F-box and WD repeat domain containing 10                                                     | Homo sapiens F-box and WD repeat domain containing 10 (FBXW10), mRNA [NM_031456]                                                                            | 4.95898 | up | 3.28491  | up | 15.65503    | 3.26885     | 16.96856    | 4.55499    | Detected | Compromised | Detected    | Compromised |
| 1022 | A_24_P158314  | GARL3     | Hs.29304  | GTPase activating Rap/RanGAP domain-like 3                                                   | Homo sapiens GTPase activating Rap/RanGAP domain-like 3 (GARL3), mRNA [NM_032293]                                                                           | 4.95722 | up | 5.38251  | up | 104.13960   | 21.75260    | 104.68707   | 17.15039   | Detected | Detected    | Detected    | Detected    |
| 1023 | A_23_P131089  | KANK3     | Hs.322473 | KN motif and ankyrin repeat domains 3                                                        | Homo sapiens KN motif and ankyrin repeat domains 3 (KANK3), mRNA [NM_198471]                                                                                | 4.95385 | up | 5.27755  | up | 620.36920   | 129.67040   | 651.26260   | 108.81519  | Detected | Detected    | Detected    | Detected    |
| 1024 | A_23_P121082  | GBE1      | Hs.436062 | glucan (1,4-alpha-), branching enzyme 1                                                      | Homo sapiens glucan (1,4-alpha-), branching enzyme 1 (GBE1), mRNA [NM_000158]                                                                               | 4.95374 | up | 4.81197  | up | 50205.56200 | 10494.25600 | 36161.38700 | 6626.56300 | Detected | Detected    | Detected    | Detected    |
| 1025 | A_23_P50368   | OSCAR     | Hs.347655 | osteoclast associated, immunoglobulin-like receptor                                          | Homo sapiens osteoclast associated, immunoglobulin-like receptor (OSCAR), transcript variant 1, mRNA [NM_206818]                                            | 4.95261 | up | 7.32111  | up | 2993.29880  | 625.82010   | 2376.73540  | 286.26590  | Detected | Detected    | Detected    | Detected    |
| 1026 | A_23_P73114   | PROS1     | Hs.64016  | protein S (alpha)                                                                            | Homo sapiens protein S (alpha) (PROS1), mRNA [NM_000313]                                                                                                    | 4.95118 | up | 5.11571  | up | 6521.92240  | 1363.95560  | 3663.78930  | 631.52466  | Detected | Detected    | Detected    | Detected    |
| 1027 | A_23_P371039  | NTSR1     | Hs.590869 | neurotensin receptor 1 (high affinity)                                                       | Homo sapiens neurotensin receptor 1 (high affinity) (NTSR1), mRNA [NM_002531]                                                                               | 4.95019 | up | 18.02848 | up | 140.45374   | 29.37950    | 106.88300   | 5.22775    | Detected | Detected    | Detected    | Compromised |
| 1028 | A_33_P3232637 | LOC729417 | Hs.378425 | hypothetical LOC729417                                                                       | PREDICTED: Homo sapiens hypothetical LOC729417 (LOC729417), mRNA [XM_001130175]                                                                             | 4.93102 | up | 3.47178  | up | 64.83331    | 13.61427    | 38.43239    | 9.76136    | Detected | Compromised | Detected    | Compromised |
| 1029 | A_23_P127557  | KBTBD3    | Hs.101949 | kelch repeat and BTB (POZ) domain containing 3                                               | Homo sapiens kelch repeat and BTB (POZ) domain containing 3 (KBTBD3), transcript variant 2, mRNA [NM_198439]                                                | 4.92969 | up | 8.99072  | up | 70.11935    | 14.72825    | 54.14061    | 5.30999    | Detected | Compromised | Detected    | Compromised |

|      |               |              |           |                                                                                                                          |         |    |          |    |             |            |             |            |          |             |             |             |
|------|---------------|--------------|-----------|--------------------------------------------------------------------------------------------------------------------------|---------|----|----------|----|-------------|------------|-------------|------------|----------|-------------|-------------|-------------|
| 1030 | A_23_P104188  | ELF3         | Hs.67928  | E74-like factor 3 (ets domain transcription factor, epithelial-specific ) (ELF3), transcript variant 1, mRNA [NM_004433] | 4.92884 | up | 3.85855  | up | 16.28275    | 3.42071    | 13.55224    | 3.09708    | Detected | Compromised | Compromised | Compromised |
| 1031 | A_24_P339416  | ARSG         | Hs.437249 | arylsulfatase G                                                                                                          | 4.92708 | up | 6.13373  | up | 608.82090   | 127.90578  | 719.41080   | 103.42311  | Detected | Detected    | Detected    | Detected    |
| 1032 | A_33_P3276100 | LOC100130015 | Hs.719553 | hypothetical LOC100130015                                                                                                | 4.92685 |    | 4.09913  | up | 294.14316   | 61.81912   | 201.16812   | 43.27463   | Detected | Detected    | Detected    | Detected    |
| 1033 | A_23_P40611   | TCN2         | Hs.417948 | transcobalamin II; macrocytic anemia                                                                                     | 4.91426 |    | 5.48596  | up | 98.12585    | 20.67563   | 101.35101   | 16.29076   | Detected | Detected    | Detected    | Detected    |
| 1034 | A_23_P21560   | FAM49A       | Hs.467769 | family with sequence similarity 49, member A                                                                             | 4.91061 |    | 4.96244  | up | 90.51275    | 19.08567   | 84.09650    | 14.94334   | Detected | Detected    | Detected    | Detected    |
| 1035 | A_23_P340376  | MSTP9        | Hs.655432 | macrophage stimulating, pseudogene 9                                                                                     | 4.90796 |    | 4.72500  | up | 16.01123    | 3.37798    | 21.15229    | 3.94749    | Detected | Compromised | Detected    | Compromised |
| 1036 | A_23_P73413   | SLC26A7      | Hs.354013 | solute carrier family 26, member 7                                                                                       | 4.90746 |    | 4.41081  | up | 15.13291    | 3.19300    | 13.47427    | 2.69372    | Detected | Compromised | Detected    | Compromised |
| 1037 | A_23_P26386   | TPPP3        | Hs.534458 | tubulin polymerization-promoting protein family member 3                                                                 | 4.90607 |    | 4.88889  | up | 91.88711    | 19.39341   | 86.69645    | 15.63712   | Detected | Detected    | Detected    | Detected    |
| 1038 | A_33_P3302957 | PLEKHG4      | Hs.188781 | pleckstrin homology domain containing, family G (with RhoGef domain) member 4                                            | 4.90529 |    | 4.51352  | up | 2367.56520  | 499.76993  | 2145.76590  | 419.21124  | Detected | Detected    | Detected    | Detected    |
| 1039 | A_23_P19182   | REEP2        | Hs.416090 | receptor accessory protein 2                                                                                             | 4.90397 |    | 4.68518  | up | 10293.22000 | 2173.38450 | 9871.66900  | 1857.93050 | Detected | Detected    | Detected    | Detected    |
| 1040 | A_32_P221991  | RALGPS1      | Hs.432842 | Ral GEF with PH domain and SH3 binding motif 1                                                                           | 4.90345 |    | 4.34820  | up | 97.67721    | 20.62646   | 95.78336    | 19.42431   | Detected | Detected    | Detected    | Detected    |
| 1041 | A_23_P64828   | OAS1         | Hs.524760 | 2',5'-oligoadenylate synthetase 1, 40/46kDa                                                                              | 4.89465 |    | 2.37652  | up | 18.03274    | 3.81481    | 8.80052     | 3.26537    | Detected | Compromised | Compromised | Compromised |
| 1042 | A_33_P3352148 | AGAP2        | Hs.302435 | ArfGAP with GTPase domain, ankyrin repeat and PH domain 2                                                                | 4.88578 |    | 12.25563 | up | 80.01869    | 16.95864   | 46.05290    | 3.31350    | Detected | Compromised | Detected    | Compromised |
| 1043 | A_33_P3394297 |              |           | Threonine synthase-like 2 (TSH2)(EC 4.2.3.-) [Source:UniProtKB/Swiss-Prot;Acc:Q86YJ6] [ENST00000402102]                  | 4.87958 |    | 5.29729  | up | 149.06760   | 31.63256   | 140.17593   | 23.33377   | Detected | Detected    | Detected    | Detected    |
| 1044 | A_33_P3282988 | LOC100131582 | Hs.671136 | hypothetical protein LOC100131582                                                                                        | 4.87442 |    | 2.89547  | up | 66.58831    | 14.14516   | 70.79940    | 21.56137   | Detected | Compromised | Detected    | Detected    |
| 1045 | A_33_P3384362 |              |           |                                                                                                                          | 4.86357 |    | 3.40371  | up | 17.98289    | 3.82858    | 13.12855    | 3.40118    | Detected | Compromised | Compromised | Compromised |
| 1046 | A_33_P3630129 | FLJ46875     | Hs.641142 | hypothetical LOC440918                                                                                                   | 4.86268 |    | 6.53903  | up | 287.96625   | 61.31950   | 194.59586   | 26.24131   | Detected | Detected    | Detected    | Detected    |
| 1047 | A_23_P98844   | GEFT         | Hs.61581  | RhoA/RAC/CDC42 exchange factor                                                                                           | 4.85520 |    | 3.76392  | up | 327.26917   | 69.79605   | 640.58704   | 150.07327  | Detected | Detected    | Detected    | Detected    |
| 1048 | A_33_P3231613 | CSAG3        | Hs.721609 | CSAG family, member 3                                                                                                    | 4.85078 |    | 5.33233  | up | 335.31204   | 71.57658   | 166.93796   | 27.60601   | Detected | Detected    | Detected    | Detected    |
| 1049 | A_23_P37994   | TP53TG3      | Hs.592038 | TP53 target 3                                                                                                            | 4.84474 |    | 5.72223  | up | 190.25005   | 40.66186   | 115.41032   | 17.78462   | Detected | Detected    | Detected    | Detected    |
| 1050 | A_33_P3270445 | BAI2         | Hs.524138 | brain-specific angiogenesis inhibitor 2                                                                                  | 4.84301 |    | 4.16014  | up | 472.03265   | 100.92283  | 417.83597   | 88.56529   | Detected | Detected    | Detected    | Detected    |
| 1051 | A_24_P216421  | DTNB         | Hs.307720 | dystrobrevin, beta                                                                                                       | 4.83929 |    | 4.41555  | up | 205.77829   | 44.03020   | 106.35621   | 21.23948   | Detected | Detected    | Detected    | Detected    |
| 1052 | A_23_P92093   | CELSR3       | Hs.631926 | cadherin, EGF LAG seven-pass G-type receptor 3 (flamingo homolog, Drosophila)                                            | 4.83875 |    | 6.13592  | up | 352.94574   | 75.52793   | 355.62470   | 51.10666   | Detected | Detected    | Detected    | Detected    |
| 1053 | A_33_P3392391 | CPT1C        | Hs.112195 | carnitine palmitoyltransferase 1C                                                                                        | 4.83805 |    | 4.48652  | up | 1989.02890  | 425.70023  | 1684.93620  | 331.16090  | Detected | Detected    | Detected    | Detected    |
| 1054 | A_33_P3362148 | LOC284900    |           | hypothetical LOC284900                                                                                                   | 4.83485 |    | 5.80876  | up | 236.40208   | 50.62920   | 235.46126   | 35.74389   | Detected | Detected    | Detected    | Detected    |
| 1055 | A_23_P134426  | GPNMB        | Hs.190495 | glycoprotein (transmembrane) nmb                                                                                         | 4.83172 |    | 5.20551  | up | 28336.66600 | 6072.67000 | 23220.44500 | 3933.44560 | Detected | Detected    | Detected    | Detected    |
| 1056 | A_32_P128391  | LOC728431    | Hs.380738 | hypothetical LOC728431                                                                                                   | 4.83150 |    | 4.40908  | up | 685.19830   | 146.84780  | 866.53270   | 173.30140  | Detected | Detected    | Detected    | Detected    |
| 1057 | A_24_P630490  | DFNB59       | Hs.87734  | deafness, autosomal recessive 59                                                                                         | 4.83027 |    | 6.09650  | up | 308.57205   | 66.14830   | 299.01940   | 43.24982   | Detected | Detected    | Detected    | Detected    |
| 1058 | A_33_P3733417 | DRD2         | Hs.73893  | dopamine receptor D2                                                                                                     | 4.81824 |    | 3.07761  | up | 13.94650    | 2.99716    | 8.68712     | 2.48902    | Detected | Compromised | Compromised | Compromised |

|      |               |              |           |                                                                                                                                                               |         |    |          |    |             |            |             |            |          |             |             |             |
|------|---------------|--------------|-----------|---------------------------------------------------------------------------------------------------------------------------------------------------------------|---------|----|----------|----|-------------|------------|-------------|------------|----------|-------------|-------------|-------------|
| 1059 | A_33_P3349883 |              |           | Galectin-8 (Gal-8)(Prostate carcinoma tumor antigen 1)(PCTA-1)(P666-CBP) [Source:UniProtKB/Swiss-Prot;Acc:O00214] [ENST00000366583]                           | 4.81591 | up | 2.15016  | up | 26.88005    | 5.77942    | 26.08296    | 10.69672   | Detected | Compromised | Detected    | Compromised |
| 1060 | A_24_P213370  | Hs.720324    |           | cDNA FLJ26472 fis. clone KDN04506 [Source:UniProtKB/TrEMBL;Acc:Q6ZP57] [ENST00000357132]                                                                      | 4.81171 | up | 5.60432  | up | 796.91327   | 171.49223  | 388.07460   | 61.06018   | Detected | Detected    | Detected    | Detected    |
| 1061 | A_33_P3407895 | RINL         | Hs.446933 | Ras and Rab interactor-like (RINL), mRNA [NM_198445]                                                                                                          | 4.80731 | up | 4.30713  | up | 780.31100   | 168.07335  | 897.40247   | 183.72337  | Detected | Detected    | Detected    | Detected    |
| 1062 | A_33_P3262376 | OTUD7A       | Hs.355236 | OTU domain containing 7A (OTUD7A), mRNA [NM_130901]                                                                                                           | 4.80534 | up | 6.82898  | up | 120.16871   | 25.89410   | 106.65578   | 13.77191   | Detected | Detected    | Detected    | Compromised |
| 1063 | A_33_P3297606 |              | Hs.177968 | Phospholipid scramblase 2 (PL scramblase 2)(Ca <sup>2+</sup> )-dependent phospholipid scramblase 2 [Source:UniProtKB/Swiss-Prot;Acc:Q9NRY7] [ENST00000463633] | 4.80252 | up | 5.08588  | up | 15.15626    | 3.26780    | 22.53095    | 3.90642    | Detected | Compromised | Detected    | Compromised |
| 1064 | A_23_P61487   | LRRC20       | Hs.7778   | leucine rich repeat containing 20 (LRRC20), transcript variant 3, mRNA [NM_018205]                                                                            | 4.80184 | up | 4.70901  | up | 3053.15500  | 658.37610  | 3148.28170  | 589.53516  | Detected | Detected    | Detected    | Detected    |
| 1065 | A_32_P130788  | SAMD13       | Hs.591445 | sterile alpha motif domain containing 13 (SAMD13), transcript variant 1, mRNA [NM_001010971]                                                                  | 4.79023 | up | 7.27905  | up | 141.98491   | 30.69155   | 121.84958   | 14.76097   | Detected | Detected    | Detected    | Detected    |
| 1066 | A_23_P324327  | GPRC5B       | Hs.148685 | G protein-coupled receptor, family C, group 5, member B (GPRC5B), mRNA [NM_016235]                                                                            | 4.78839 | up | 5.77940  | up | 144.73958   | 31.29900   | 145.35898   | 22.17813   | Detected | Detected    | Detected    | Detected    |
| 1067 | A_24_P682579  |              |           |                                                                                                                                                               | 4.78737 | up | 4.64458  | up | 20.08476    | 4.34413    | 17.73376    | 3.36682    | Detected | Compromised | Detected    | Compromised |
| 1068 | A_23_P7957    | GNMT         | Hs.144914 | glycine N-methyltransferase (GNMT), mRNA [NM_018960]                                                                                                          | 4.78702 | up | 6.28200  | up | 96.38959    | 20.84528   | 118.07719   | 16.57423   | Detected | Detected    | Detected    | Detected    |
| 1069 | A_23_P502343  | ADAM33       | Hs.173716 | ADAM metallopeptidase domain 33 (ADAM33), transcript variant 1, mRNA [NM_025220]                                                                              | 4.76658 | up | 5.50664  | up | 3425.10600  | 744.04626  | 3382.75460  | 541.68854  | Detected | Detected    | Detected    | Detected    |
| 1070 | A_23_P211522  | SYNGR1       | Hs.216226 | synaptogyrin 1 (SYNGR1), transcript variant 1c, mRNA [NM_145738]                                                                                              | 4.76622 | up | 4.43900  | up | 889.98016   | 193.34769  | 1409.33070  | 279.95853  | Detected | Detected    | Detected    | Detected    |
| 1071 | A_24_P309645  | TPCN1        | Hs.524763 | two pore segment channel 1 (TPCN1), transcript variant 2, mRNA [NM_017901]                                                                                    | 4.76478 | up | 4.12708  | up | 991.42030   | 215.45064  | 881.98350   | 188.44418  | Detected | Detected    | Detected    | Detected    |
| 1072 | A_24_P73075   | TTC12        | Hs.288772 | tetratricopeptide repeat domain 12 (TTC12), mRNA [NM_017868]                                                                                                  | 4.76058 | up | 5.13604  | up | 320.41846   | 69.69331   | 220.34850   | 37.83093   | Detected | Detected    | Detected    | Detected    |
| 1073 | A_23_P304110  | ANKRD43      | Hs.13308  | ankyrin repeat domain 43 (ANKRD43), mRNA [NM_175873]                                                                                                          | 4.75926 | up | 2.94896  | up | 18.75188    | 4.07980    | 10.58516    | 3.16515    | Detected | Compromised | Compromised | Compromised |
| 1074 | A_33_P3244274 | RNF208       | Hs.512767 | ring finger protein 208 (RNF208), mRNA [NM_031297]                                                                                                            | 4.75610 | up | 4.07712  | up | 497.28550   | 108.26498  | 593.35016   | 128.32846  | Detected | Detected    | Detected    | Detected    |
| 1075 | A_33_P3281028 | MACROD2      | Hs.661576 | MACRO domain containing 2 (MACROD2), transcript variant 1, mRNA [NM_080678]                                                                                   | 4.75595 | up | 4.53521  | up | 14.55479    | 3.16885    | 13.68711    | 2.66121    | Detected | Compromised | Detected    | Compromised |
| 1076 | A_33_P3416787 |              |           |                                                                                                                                                               | 4.75555 | up | 4.68585  | up | 19.65307    | 4.27920    | 19.58363    | 3.68528    | Detected | Compromised | Detected    | Compromised |
| 1077 | A_24_P73730   | CCDC113      | Hs.11614  | coiled-coil domain containing 113 (CCDC113), transcript variant 1, mRNA [NM_014157]                                                                           | 4.75178 | up | 6.21937  | up | 191.24718   | 41.67465   | 116.12389   | 16.46420   | Detected | Detected    | Detected    | Compromised |
| 1078 | A_33_P3475906 | LOC100130331 | Hs.661736 | actin, gamma-like (LOC100130331), non-coding RNA [NR_027247]                                                                                                  | 4.75060 | up | 4.53641  | up | 14.43980    | 3.14736    | 13.58900    | 2.64144    | Detected | Compromised | Detected    | Compromised |
| 1079 | A_33_P3417305 | LOC645225    |           | PREDICTED: Homo sapiens similar to ATP synthase, H <sup>+</sup> transporting, mitochondrial F0 complex, subunit F2 (LOC645225), mRNA [XM_001720758]           | 4.74431 | up | 24.91087 | up | 433.88000   | 94.69554   | 309.63763   | 10.96050   | Detected | Detected    | Detected    | Compromised |
| 1080 | A_33_P3265260 |              |           |                                                                                                                                                               | 4.74401 | up | 2.75549  | up | 16.87539    | 3.68333    | 10.96474    | 3.50885    | Detected | Compromised | Compromised | Compromised |
| 1081 | A_33_P3358745 | SEPP1        | Hs.275775 | selenoprotein P, plasma, 1 (SEPP1), transcript variant 3, mRNA [NM_001093726]                                                                                 | 4.73522 | up | 6.21029  | up | 2137.99700  | 467.51993  | 1985.97560  | 281.98600  | Detected | Detected    | Detected    | Detected    |
| 1082 | A_24_P212435  | NCOA7        | Hs.171426 | nuclear receptor coactivator 7 (NCOA7), transcript variant 1, mRNA [NM_181782]                                                                                | 4.72980 | up | 4.60080  | up | 3495.45390  | 765.26560  | 2739.63010  | 525.07886  | Detected | Detected    | Detected    | Detected    |
| 1083 | A_23_P65532   | PEL12        | Hs.657926 | pellino homolog 2 (Drosophila) (PEL12), mRNA [NM_021255]                                                                                                      | 4.72567 | up | 4.42256  | up | 2086.19600  | 457.11472  | 2279.81370  | 454.55948  | Detected | Detected    | Detected    | Detected    |
| 1084 | A_23_P218817  | CPT1B        | Hs.439777 | carnitine palmitoyltransferase 1B (muscle) (CPT1B), nuclear gene encoding mitochondrial protein, transcript variant 3, mRNA [NM_152246]                       | 4.72221 | up | 4.61717  | up | 496.39972   | 108.84767  | 452.31473   | 86.38345   | Detected | Detected    | Detected    | Detected    |
| 1085 | A_33_P3228132 | LOC400891    |           | chromosome 14 open reading frame 166B pseudogene (LOC400891), non-coding RNA [NR_027006]                                                                      | 4.72032 | up | 2.58015  | up | 43.54580    | 9.55231    | 8.22259     | 2.81015    | Detected | Compromised | Compromised | Compromised |
| 1086 | A_33_P3262884 | LOC440104    | Hs.720564 | hypothetical LOC440104                                                                                                                                        | 4.72015 | up | 2.94697  | up | 20.16032    | 4.42257    | 18.72776    | 5.60370    | Detected | Compromised | Detected    | Compromised |
| 1087 | A_23_P99515   | C13orf33     | Hs.147880 | chromosome 13 open reading frame 33 (C13orf33), mRNA [NM_032849]                                                                                              | 4.71820 | up | 4.66863  | up | 32043.70700 | 7032.33940 | 30612.00000 | 5781.85740 | Detected | Detected    | Detected    | Detected    |
| 1088 | A_33_P3219398 | ZNF521       | Hs.116935 | zinc finger protein 521 (ZNF521), mRNA [NM_015461]                                                                                                            | 4.71485 | up | 4.70203  | up | 472.12003   | 103.68549  | 508.35406   | 95.33361   | Detected | Detected    | Detected    | Detected    |

|      |               |          |           |                                                                   |                                                                                                                                |         |    |          |    |             |            |             |            |              |             |             |             |
|------|---------------|----------|-----------|-------------------------------------------------------------------|--------------------------------------------------------------------------------------------------------------------------------|---------|----|----------|----|-------------|------------|-------------|------------|--------------|-------------|-------------|-------------|
| 1089 | A_33_P3221203 | MMP13    | Hs.2936   | matrix metalloproteinase 13 (collagenase 3)                       | Homo sapiens matrix metalloproteinase 13 (collagenase 3) (MMP13), mRNA [NM_002427]                                             | 4.71329 | up | 2.16280  | up | 14.07820    | 3.09283    | 9.67851     | 3.94601    | Detected     | Compromised | Compromised | Compromised |
| 1090 | A_23_P302672  | DDIT4L   | Hs.480378 | DNA-damage-inducible transcript 4-like                            | Homo sapiens DNA-damage-inducible transcript 4-like (DDIT4L), mRNA [NM_145244]                                                 | 4.71277 | up | 4.33118  | up | 917.03240   | 201.48427  | 720.10740   | 146.60779  | Detected     | Detected    | Detected    | Detected    |
| 1091 | A_23_P120863  | GAL3ST1  | Hs.17958  | galactose-3-O-sulfotransferase 1                                  | Homo sapiens galactose-3-O-sulfotransferase 1 (GAL3ST1), mRNA [NM_004951]                                                      | 4.71012 | up | 2.99743  | up | 28.98957    | 6.37298    | 22.76339    | 6.69659    | Detected     | Compromised | Detected    | Compromised |
| 1092 | A_23_P24433   | CTSF     | Hs.11590  | cathepsin F                                                       | Homo sapiens cathepsin F (CTSF), mRNA [NM_003793]                                                                              | 4.70868 | up | 4.31483  | up | 30439.95700 | 6693.87900 | 28025.80900 | 5727.43360 | Detected     | Detected    | Detected    | Detected    |
| 1093 | A_23_P251031  | IL13     | Hs.845    | interleukin 13                                                    | Homo sapiens interleukin 13 (IL13), mRNA [NM_002188]                                                                           | 4.70451 | up | 3.69135  | up | 29.29162    | 6.44707    | 13.45505    | 3.21415    | Detected     | Compromised | Compromised | Compromised |
| 1094 | A_23_P501831  | C5orf4   | Hs.519694 | chromosome 5 open reading frame 4                                 | Homo sapiens chromosome 5 open reading frame 4 (C5orf4), mRNA [NM_032385]                                                      | 4.70293 | up | 4.79990  | up | 2789.32930  | 614.13620  | 2174.94530  | 399.55997  | Detected     | Detected    | Detected    | Detected    |
| 1095 | A_32_P126375  | NHS      | Hs.201623 | Nance-Horan syndrome (congenital cataracts and dental anomalies)  | Homo sapiens Nance-Horan syndrome (congenital cataracts and dental anomalies) (NHS), transcript variant 1, mRNA [NM_198270]    | 4.70256 | up | 5.40982  | up | 1340.76590  | 295.22406  | 981.63446   | 160.00449  | Detected     | Detected    | Detected    | Detected    |
| 1096 | A_23_P160886  | TAS1R1   | Hs.124574 | taste receptor, type 1, member 1                                  | Homo sapiens taste receptor, type 1, member 1 (TAS1R1), transcript variant 2, mRNA [NM_138697]                                 | 4.70083 | up | 3.83593  | up | 361.56300   | 79.64212   | 360.13248   | 82.78603   | Detected     | Detected    | Detected    | Detected    |
| 1097 | A_33_P3327842 | ZNF436   | Hs.293798 | zinc finger protein 436                                           | Homo sapiens zinc finger protein 436 (ZNF436), transcript variant 1, mRNA [NM_001077195]                                       | 4.69345 | up | 2.02925  | up | 18.07686    | 3.98808    | 17.51654    | 7.61163    | Detected     | Compromised | Detected    | Compromised |
| 1098 | A_32_P178966  | TMEM170B | Hs.146317 | transmembrane protein 170B                                        | Homo sapiens transmembrane protein 170B (TMEM170B), mRNA [NM_001100829]                                                        | 4.69212 | up | 5.35830  | up | 331.79984   | 73.22176   | 260.85242   | 42.92730   | Detected     | Detected    | Detected    | Detected    |
| 1099 | A_23_P203439  | KCNK1    | Hs.552896 | potassium voltage-gated channel, Shaw-related subfamily, member 1 | Homo sapiens potassium voltage-gated channel, Shaw-related subfamily, member 1 (KCNK1), transcript variant B, mRNA [NM_004976] | 4.68346 | up | 5.21333  | up | 23.78365    | 5.25829    | 20.46592    | 3.46164    | Detected     | Compromised | Detected    | Compromised |
| 1100 | A_33_P3229552 | LRFN1    | Hs.97860  | leucine rich repeat and fibronectin type III domain containing 1  | Homo sapiens leucine rich repeat and fibronectin type III domain containing 1 (LRFN1), mRNA [NM_020882]                        | 4.68061 | up | 12.78048 | up | 54.53041    | 12.06339   | 59.94556    | 4.13595    | Detected     | Compromised | Detected    | Compromised |
| 1101 | A_23_P161399  | MXI1     | Hs.501023 | MAX interactor 1                                                  | Homo sapiens MAX interactor 1 (MXI1), transcript variant 2, mRNA [NM_130439]                                                   | 4.67872 | up | 5.13212  | up | 3046.89670  | 674.31670  | 1828.73330  | 314.20944  | Detected     | Detected    | Detected    | Detected    |
| 1102 | A_33_P3290040 | CPT1C    | Hs.112195 | carnitine palmitoyltransferase 1C                                 | Homo sapiens carnitine palmitoyltransferase 1C (CPT1C), transcript variant 2, mRNA [NM_152359]                                 | 4.67785 | up | 4.35979  | up | 3486.45870  | 771.74020  | 3172.10900  | 641.57526  | Detected     | Detected    | Detected    | Detected    |
| 1103 | A_32_P88415   | MYOZ3    | Hs.91626  | myozenin 3                                                        | Homo sapiens myozenin 3 (MYOZ3), transcript variant 2, mRNA [NM_133371]                                                        | 4.66894 | up | 3.93725  | up | 378.48758   | 83.93958   | 363.55865   | 81.42294   | Detected     | Detected    | Detected    | Detected    |
| 1104 | A_23_P122796  | HDDC2    | Hs.32826  | HD domain containing 2                                            | Homo sapiens HD domain containing 2 (HDDC2), mRNA [NM_016063]                                                                  | 4.65671 | up | 4.98417  | up | 403.69067   | 89.76413   | 352.45148   | 62.35508   | Detected     | Detected    | Detected    | Detected    |
| 1105 | A_24_P310256  | LG4      | Hs.65256  | leucine-rich repeat LGI family, member 4                          | Homo sapiens leucine-rich repeat LGI family, member 4 (LG4), mRNA [NM_139284]                                                  | 4.65600 | up | 4.53103  | up | 136.11810   | 30.27167   | 138.62450   | 26.97792   | Detected     | Detected    | Detected    | Detected    |
| 1106 | A_23_P78742   | FLT3LG   | Hs.428    | fms-related tyrosine kinase 3 ligand                              | Homo sapiens fms-related tyrosine kinase 3 ligand (FLT3LG), mRNA [NM_001459]                                                   | 4.65472 | up | 4.07337  | up | 224.41699   | 49.92235   | 287.29944   | 62.19375   | Detected     | Detected    | Detected    | Detected    |
| 1107 | A_24_P133017  | TMEM25   | Hs.564188 | transmembrane protein 25                                          | Homo sapiens transmembrane protein 25 (TMEM25), transcript variant 1, mRNA [NM_032780]                                         | 4.65166 | up | 3.91529  | up | 250.04425   | 55.65982   | 256.41800   | 57.74971   | Detected     | Detected    | Detected    | Detected    |
| 1108 | A_33_P3300837 | LDB2     | Hs.714330 | LIM domain binding 2                                              | Homo sapiens LIM domain binding 2 (LDB2), transcript variant 1, mRNA [NM_001290]                                               | 4.65163 | up | 3.16345  | up | 33.87443    | 7.54049    | 28.66180    | 7.98930    | Detected     | Compromised | Detected    | Compromised |
| 1109 | A_24_P177279  | CSDC2    | Hs.310893 | cold shock domain containing C2, RNA binding                      | Homo sapiens cold shock domain containing C2, RNA binding (CSDC2), mRNA [NM_014460]                                            | 4.64873 | up | 2.77170  | up | 44.47540    | 9.90647    | 43.42648    | 13.81576   | Detected     | Compromised | Detected    | Compromised |
| 1110 | A_23_P159952  | BEX1     | Hs.334370 | brain expressed, X-linked 1                                       | Homo sapiens brain expressed, X-linked 1 (BEX1), mRNA [NM_018476]                                                              | 4.64833 | up | 4.89203  | up | 8086.93100  | 1801.44100 | 4423.39400  | 797.31903  | Detected     | Detected    | Detected    | Detected    |
| 1111 | A_23_P257583  | DENND2A  | Hs.6385   | DENN/MADD domain containing 2A                                    | Homo sapiens DENN/MADD domain containing 2A (DENND2A), mRNA [NM_015689]                                                        | 4.64435 | up | 4.61039  | up | 219.46133   | 48.92904   | 285.48126   | 54.60156   | Detected     | Detected    | Detected    | Detected    |
| 1112 | A_23_P212050  | BCHE     | Hs.420483 | butyrylcholinesterase                                             | Homo sapiens butyrylcholinesterase (BCHE), mRNA [NM_000055]                                                                    | 4.64322 | up | 6.76945  | up | 156.14903   | 34.82197   | 160.59910   | 20.91968   | Detected     | Detected    | Detected    | Detected    |
| 1113 | A_33_P3248982 | FAIM2    | Hs.567424 | Fas apoptotic inhibitory molecule 2                               | Homo sapiens Fas apoptotic inhibitory molecule 2 (FAIM2), mRNA [NM_012306]                                                     | 4.63904 | up | 8.07217  | up | 1640.81920  | 366.23972  | 939.99090   | 102.68311  | Detected     | Detected    | Detected    | Detected    |
| 1114 | A_23_P61466   | CD163L1  | Hs.631727 | CD163 molecule-like 1                                             | Homo sapiens CD163 molecule-like 1 (CD163L1), mRNA [NM_174941]                                                                 | 4.63676 | up | 5.00990  | up | 1274.04190  | 284.51294  | 1365.30410  | 240.30660  | Detected     | Detected    | Detected    | Detected    |
| 1115 | A_23_P125505  | PPEF1    | Hs.211589 | protein phosphatase, EF-hand calcium binding domain 1             | Homo sapiens protein phosphatase, EF-hand calcium binding domain 1 (PPEF1), transcript variant 1, mRNA [NM_006240]             | 4.63422 | up | 1.21955  | up | 15.54859    | 3.47414    | 4.04404     | 2.92403    | Detected     | Compromised | Compromised | Compromised |
| 1116 | A_32_P31963   |          |           |                                                                   |                                                                                                                                | 4.63019 | up | 4.79430  | up | 13.21870    | 2.95613    | 13.18354    | 2.42478    | Detected     | Compromised | Detected    | Compromised |
| 1117 | A_23_P113471  | FAAH2    | Hs.720593 | fatty acid amide hydrolase 2                                      | Homo sapiens fatty acid amide hydrolase 2 (FAAH2), mRNA [NM_174912]                                                            | 4.62988 | up | 5.28911  | up | 17.73367    | 3.96608    | 22.46531    | 3.74537    | Not Detected | Compromised | Detected    | Compromised |
| 1118 | A_33_P3366471 |          |           |                                                                   |                                                                                                                                | 4.62468 | up | 1.34771  | up | 26.53721    | 5.94164    | 7.48528     | 4.89754    | Detected     | Compromised | Compromised | Compromised |
| 1119 | A_23_P168771  | CCDC146  | Hs.113940 | coiled-coil domain containing 146                                 | Homo sapiens coiled-coil domain containing 146 (CCDC146), mRNA [NM_020879]                                                     | 4.62132 | up | 4.96281  | up | 265.67792   | 59.52819   | 212.14160   | 37.69326   | Detected     | Detected    | Detected    | Detected    |
| 1120 | A_23_P369701  | FAM108C1 | Hs.459072 | family with sequence similarity 108, member C1                    | Homo sapiens family with sequence similarity 108, member C1 (FAM108C1), mRNA [NM_021214]                                       | 4.61564 | up | 4.66499  | up | 6549.07900  | 1469.20080 | 4147.35500  | 783.94610  | Detected     | Detected    | Detected    | Detected    |

|      |               |           |           |                                                                             |                                                                                                                                                                                                       |         |    |         |    |            |            |            |            |          |             |             |             |
|------|---------------|-----------|-----------|-----------------------------------------------------------------------------|-------------------------------------------------------------------------------------------------------------------------------------------------------------------------------------------------------|---------|----|---------|----|------------|------------|------------|------------|----------|-------------|-------------|-------------|
| 1121 | A_33_P3308949 | DBT       | Hs.709187 | dihydroipoamide branched chain transacylase E2                              | Homo sapiens dihydroipoamide branched chain transacylase E2 (DBT), nuclear gene encoding mitochondrial protein, mRNA [NM_001918]                                                                      | 4.61551 | up | 5.02506 | up | 906.63916  | 203.39856  | 724.56714  | 127.14599  | Detected | Detected    | Detected    | Detected    |
| 1122 | A_23_P167599  | FAM134B   | Hs.711125 | family with sequence similarity 134, member B                               | Homo sapiens family with sequence similarity 134, member B (FAM134B), transcript variant 1, mRNA [NM_001034850]                                                                                       | 4.61499 | up | 5.41101 | up | 767.93115  | 172.29991  | 568.76636  | 92.68749   | Detected | Detected    | Detected    | Detected    |
| 1123 | A_23_P31273   | AMPH      | Hs.592182 | amphiphysin                                                                 | Homo sapiens amphiphysin (AMPH), transcript variant 1, mRNA [NM_001635]                                                                                                                               | 4.61476 | up | 3.80119 | up | 731.79850  | 164.20102  | 628.08250  | 145.70097  | Detected | Detected    | Detected    | Detected    |
| 1124 | A_24_P6030    |           | Hs.656195 |                                                                             | Protein FAM165B [Source:UniProtKB/Swiss-Prot;Acc:P58511] [ENST00000399299]                                                                                                                            | 4.60928 | up | 5.23095 | up | 2048.03400 | 460.08408  | 1352.40710 | 227.97784  | Detected | Detected    | Detected    | Detected    |
| 1125 | A_23_P66719   | DHRS13    | Hs.631760 | dehydrogenase/reductase (SDR family) member 13                              | Homo sapiens dehydrogenase/reductase (SDR family) member 13 (DHRS13), mRNA [NM_144683]                                                                                                                | 4.60799 | up | 3.89054 | up | 1320.20620 | 296.66312  | 1130.45040 | 256.21637  | Detected | Detected    | Detected    | Detected    |
| 1126 | A_24_P73599   | IL16      | Hs.459095 | interleukin 16 (lymphocyte chemoattractant factor)                          | Homo sapiens interleukin 16 (lymphocyte chemoattractant factor) (IL16), transcript variant 2, mRNA [NM_172217]                                                                                        | 4.60425 | up | 3.15394 | up | 14.26820   | 3.20881    | 9.48871    | 2.65289    | Detected | Compromised | Compromised | Compromised |
| 1127 | A_23_P139260  | SLC22A18  | Hs.50868  | solute carrier family 22, member 18                                         | Homo sapiens solute carrier family 22, member 18 (SLC22A18), transcript variant 2, mRNA [NM_183233]                                                                                                   | 4.60253 | up | 5.42993 | up | 8157.17330 | 1835.17080 | 8984.94600 | 1459.10610 | Detected | Detected    | Detected    | Detected    |
| 1128 | A_33_P3299416 | GRASP     | Hs.407202 | GRP1 (general receptor for phosphoinositides 1)-associated scaffold protein | Homo sapiens GRP1 (general receptor for phosphoinositides 1)-associated scaffold protein (GRASP), mRNA [NM_181711]                                                                                    | 4.60110 | up | 4.46710 | up | 5112.23140 | 1150.48840 | 4425.42970 | 873.56604  | Detected | Detected    | Detected    | Detected    |
| 1129 | A_33_P3297020 | PSORS1C3  | Hs.670091 | psoriasis susceptibility 1 candidate 3 (non-protein coding)                 | Homo sapiens psoriasis susceptibility 1 candidate 3 (non-protein coding) (PSORS1C3), non-coding RNA [NR_026816]                                                                                       | 4.59941 | up | 7.43772 | up | 83.73975   | 18.85222   | 70.24699   | 8.32824    | Detected | Detected    | Detected    | Compromised |
| 1130 | A_24_P393565  |           | Hs.351005 |                                                                             | Zinc finger protein 396 (Zinc finger and SOAN domain-containing protein 14) [Source:UniProtKB/Swiss-Prot;Acc:Q96N95] [ENST00000399057]                                                                | 4.59892 | up | 3.21661 | up | 24.32697   | 5.47728    | 28.87855   | 7.91667    | Detected | Compromised | Detected    | Compromised |
| 1131 | A_33_P3349466 | ANKRD12   | Hs.464585 | ankyrin repeat domain 12                                                    | Homo sapiens ankyrin repeat domain 12 (ANKRD12), transcript variant 1, mRNA [NM_015208]                                                                                                               | 4.59833 | up | 5.72895 | up | 133.94592  | 30.16217   | 82.55695   | 12.70703   | Detected | Detected    | Detected    | Detected    |
| 1132 | A_23_P46045   | RGS5      | Hs.24950  | regulator of G-protein signaling 5                                          | Homo sapiens regulator of G-protein signaling 5 (RGS5), mRNA [NM_003617]                                                                                                                              | 4.59506 | up | 4.37608 | up | 287.01130  | 64.67562   | 199.01865  | 40.10272   | Detected | Detected    | Detected    | Detected    |
| 1133 | A_33_P3379341 | LOC391322 | Hs.711777 | similar to D-dopachrome tautomerase                                         | Homo sapiens similar to D-dopachrome tautomerase (LOC391322), mRNA [NM_001144931]                                                                                                                     | 4.59495 | up | 5.58052 | up | 13.57341   | 3.05873    | 16.05119   | 2.53629    | Detected | Compromised | Detected    | Compromised |
| 1134 | A_32_P114028  | C10orf68  | Hs.585464 | chromosome 10 open reading frame 68                                         | Homo sapiens chromosome 10 open reading frame 68 (C10orf68), mRNA [NM_024688]                                                                                                                         | 4.59052 | up | 2.67823 | up | 46.33748   | 10.45210   | 30.88742   | 10.16948   | Detected | Compromised | Detected    | Compromised |
| 1135 | A_33_P3243439 | GPR162    | Hs.631654 | G protein-coupled receptor 162                                              | Homo sapiens G protein-coupled receptor 162 (GPR162), transcript variant A-2, mRNA [NM_019858]                                                                                                        | 4.58992 | up | 4.96466 | up | 1031.80580 | 232.76956  | 1050.26260 | 186.54080  | Detected | Detected    | Detected    | Detected    |
| 1136 | A_23_P80048   | FER1L4    | Hs.72222  | fer-1-like 4 (C. elegans)                                                   | Homo sapiens fer-1-like 4 (C. elegans) (FER1L4), non-coding RNA [NR_024377]                                                                                                                           | 4.58946 | up | 5.80347 | up | 858.55945  | 193.70550  | 722.50960  | 109.77960  | Detected | Detected    | Detected    | Detected    |
| 1137 | A_24_P82032   | RHOJ      | Hs.656339 | ras homolog gene family, member J                                           | Homo sapiens ras homolog gene family, member J (RHOJ), mRNA [NM_020663]                                                                                                                               | 4.58881 | up | 6.98154 | up | 15.60592   | 3.52146    | 23.39463   | 2.95482    | Detected | Compromised | Detected    | Compromised |
| 1138 | A_32_P223059  | SLC45A1   | Hs.463036 | solute carrier family 45, member 1                                          | Homo sapiens solute carrier family 45, member 1 (SLC45A1), mRNA [NM_001080397]                                                                                                                        | 4.58396 | up | 5.55438 | up | 104.31739  | 23.56400   | 96.16173   | 15.26625   | Detected | Detected    | Detected    | Compromised |
| 1139 | A_33_P3395314 |           | Hs.656750 |                                                                             | DB335107 SYN0V4 Homo sapiens cDNA clone SYN0V409599 3', mRNA sequence [DB335107]                                                                                                                      | 4.58354 | up | 5.04731 | up | 14.46354   | 3.26743    | 15.73334   | 2.74869    | Detected | Compromised | Detected    | Compromised |
| 1140 | A_24_P162244  |           |           |                                                                             | S phase cyclin A-associated protein in the endoplasmic reticulum (S phase cyclin A-associated protein in the ER) (Zinc finger protein 291) [Source:UniProtKB/Swiss-Prot;Acc:Q9BY12] [ENST00000303521] | 4.57768 | up | 5.43371 | up | 55.98806   | 12.66436   | 55.47908   | 9.00323    | Detected | Compromised | Detected    | Compromised |
| 1141 | A_23_P200260  | PCNXL2    | Hs.370605 | pecanex-like 2 (Drosophila)                                                 | Homo sapiens pecanex-like 2 (Drosophila) (PCNXL2), transcript variant 1, mRNA [NM_014801]                                                                                                             | 4.57458 | up | 4.08553 | up | 3050.21970 | 690.41920  | 2652.55180 | 572.50720  | Detected | Detected    | Detected    | Detected    |
| 1142 | A_23_P167389  | ARAP3     | Hs.25277  | ArfGAP with RhoGAP domain, ankyrin repeat and PH domain 3                   | Homo sapiens ArfGAP with RhoGAP domain, ankyrin repeat and PH domain 3 (ARAP3), mRNA [NM_022481]                                                                                                      | 4.57164 | up | 4.71162 | up | 2536.54170 | 574.51764  | 1746.43350 | 326.84910  | Detected | Detected    | Detected    | Detected    |
| 1143 | A_23_P374892  | CES4      |           | carboxylesterase 4-like                                                     | Homo sapiens carboxylesterase 4-like (CES4), non-coding RNA [NR_003276]                                                                                                                               | 4.56123 | up | 4.29278 | up | 13.88885   | 3.15295    | 12.84631   | 2.63879    | Detected | Compromised | Compromised | Compromised |
| 1144 | A_23_P208240  | ZNF160    | Hs.655967 | zinc finger protein 160                                                     | Homo sapiens zinc finger protein 160, mRNA (cDNA clone IMAGE3452857), complete cds. [BC000807]                                                                                                        | 4.56041 | up | 9.83779 | up | 15.21404   | 3.45441    | 33.29692   | 2.98450    | Detected | Compromised | Detected    | Compromised |
| 1145 | A_33_P3336422 | LOC729013 | Hs.649389 | hypothetical protein LOC729013                                              | Homo sapiens, clone IMAGE3930408, mRNA [BC014360]                                                                                                                                                     | 4.56005 | up | 4.05193 | up | 2951.30790 | 670.15920  | 2269.43900 | 493.88080  | Detected | Detected    | Detected    | Detected    |
| 1146 | A_23_P250619  | ZDHHC14   | Hs.187459 | zinc finger, DHHC-type containing 14                                        | Homo sapiens zinc finger, DHHC-type containing 14 (ZDHHC14), transcript variant 2, mRNA [NM_153746]                                                                                                   | 4.55699 | up | 4.16743 | up | 1812.47670 | 411.83936  | 1712.24170 | 362.29483  | Detected | Detected    | Detected    | Detected    |
| 1147 | A_24_P13024   | SLC16A12  | Hs.530338 | solute carrier family 16, member 12 (monocarboxylic acid transporter 12)    | Homo sapiens solute carrier family 16, member 12 (monocarboxylic acid transporter 12) (SLC16A12), mRNA [NM_213606]                                                                                    | 4.55221 | up | 1.15761 | up | 16.48366   | 3.74942    | 4.14773    | 3.15947    | Detected | Compromised | Compromised | Compromised |

|      |               |              |           |                                                                                  |                                                                                                                                   |         |    |          |    |            |            |            |            |          |             |             |             |
|------|---------------|--------------|-----------|----------------------------------------------------------------------------------|-----------------------------------------------------------------------------------------------------------------------------------|---------|----|----------|----|------------|------------|------------|------------|----------|-------------|-------------|-------------|
| 1148 | A_23_P135548  | DPYD         | Hs.335034 | dihydropyrimidine dehydrogenase                                                  | Homo sapiens dihydropyrimidine dehydrogenase (DPYD), transcript variant 1, mRNA [NM_000110]                                       | 4.54825 | up | 4.47335  | up | 1642.86500 | 374.01648  | 1029.18530 | 202.87373  | Detected | Detected    | Detected    | Detected    |
| 1149 | A_33_P3245484 | LOC100131000 | Hs.658271 | hypothetical protein LOC100131000                                                | Homo sapiens cDNA FLJ42370 fis, clone UTERU2030280, [AK124361]                                                                    | 4.54347 | up | 4.93922  | up | 127.87575  | 29.09739   | 129.65665  | 23.14739   | Detected | Detected    | Detected    | Detected    |
| 1150 | A_23_P307844  | PHYHD1       | Hs.709447 | phytanoyl-CoA dioxygenase domain containing 1                                    | Homo sapiens phytanoyl-CoA dioxygenase domain containing 1 (PHYHD1), transcript variant 2, mRNA [NM_174933]                       | 4.54242 | up | 4.24269  | up | 705.89100  | 160.91031  | 482.79248  | 100.34256  | Detected | Detected    | Detected    | Detected    |
| 1151 | A_24_P226962  | KIAA0368     | Hs.368255 | KIAA0368                                                                         | Homo sapiens KIAA0368 (KIAA0368), mRNA [NM_001080398]                                                                             | 4.54014 | up | 5.01180  | up | 500.20325  | 114.08032  | 369.18720  | 64.95589   | Detected | Detected    | Detected    | Detected    |
| 1152 | A_23_P114689  | ASAP3        | Hs.437379 | ArfGAP with SH3 domain, ankyrin repeat and PH domain 3                           | Homo sapiens ArfGAP with SH3 domain, ankyrin repeat and PH domain 3 (ASAP3), transcript variant 1, mRNA [NM_017707]               | 4.53819 | up | 4.06884  | up | 886.52000  | 202.27348  | 882.92330  | 190.50250  | Detected | Detected    | Detected    | Detected    |
| 1153 | A_23_P48713   | PTGR2        | Hs.632344 | prostaglandin reductase 2                                                        | Homo sapiens prostaglandin reductase 2 (PTGR2), transcript variant 1, mRNA [NM_152444]                                            | 4.53726 | up | 4.55666  | up | 384.41153  | 87.72746   | 363.63992  | 70.37046   | Detected | Detected    | Detected    | Detected    |
| 1154 | A_24_P320604  | ARMC2        | Hs.645481 | armadillo repeat containing 2                                                    | Homo sapiens armadillo repeat containing 2 (ARMC2), mRNA [NM_032131]                                                              | 4.53599 | up | 5.43194  | up | 142.82497  | 32.60357   | 113.98851  | 18.50424   | Detected | Detected    | Detected    | Detected    |
| 1155 | A_33_P3372069 | COX8C        | Hs.666459 | cytochrome c oxidase subunit 8C                                                  | Homo sapiens cytochrome c oxidase subunit 8C (COX8C), nuclear gene encoding mitochondrial protein, mRNA [NM_182971]               | 4.52442 | up | 2.20317  | up | 13.59755   | 3.11194    | 6.56927    | 2.62926    | Detected | Compromised | Compromised | Compromised |
| 1156 | A_23_P63232   | CREB3L4      | Hs.372924 | cAMP responsive element binding protein 3-like 4                                 | Homo sapiens cAMP responsive element binding protein 3-like 4 (CREB3L4), mRNA [NM_130898]                                         | 4.52346 | up | 4.52622  | up | 3004.69000 | 687.79950  | 3296.42700 | 642.20410  | Detected | Detected    | Detected    | Detected    |
| 1157 | A_33_P3252394 | GADD45G      | Hs.9701   | growth arrest and DNA-damage-inducible, gamma                                    | Homo sapiens growth arrest and DNA-damage-inducible, gamma (GADD45G), mRNA [NM_006705]                                            | 4.52141 | up | 5.30153  | up | 1010.35004 | 231.38281  | 808.46600  | 134.47029  | Detected | Detected    | Detected    | Detected    |
| 1158 | A_23_P363255  | CCDC68       | Hs.120790 | coiled-coil domain containing 68                                                 | Homo sapiens coiled-coil domain containing 68 (CCDC68), transcript variant 1, mRNA [NM_025214]                                    | 4.51390 | up | 3.73731  | up | 128.43408  | 29.46196   | 51.23665   | 12.08892   | Detected | Detected    | Detected    | Compromised |
| 1159 | A_23_P321466  | PEX11G       | Hs.515100 | peroxisomal biogenesis factor 11 gamma                                           | Homo sapiens peroxisomal biogenesis factor 11 gamma (PEX11G), mRNA [NM_080662]                                                    | 4.51340 | up | 4.05669  | up | 123.82841  | 28.40856   | 138.05542  | 30.00870   | Detected | Detected    | Detected    | Detected    |
| 1160 | A_23_P319583  | RIMS3        | Hs.654808 | regulating synaptic membrane exocytosis 3                                        | Homo sapiens regulating synaptic membrane exocytosis 3 (RIMS3), mRNA [NM_014747]                                                  | 4.51271 | up | 4.52296  | up | 88.49886   | 20.30641   | 49.97285   | 9.74265    | Detected | Detected    | Detected    | Compromised |
| 1161 | A_33_P3299220 | ADAMTSL4     | Hs.719991 | ADAMTS-like 4                                                                    | Homo sapiens ADAMTS-like 4 (ADAMTSL4), transcript variant 2, mRNA [NM_025008]                                                     | 4.50749 | up | 4.29277  | up | 3408.09720 | 782.90674  | 4386.43160 | 901.03015  | Detected | Detected    | Detected    | Detected    |
| 1162 | A_33_P3308872 | POM121L1P    | Hs.318898 | POM121 membrane glycoprotein-like 1 (rat) pseudogene                             | Homo sapiens POM121 membrane glycoprotein-like 1 (rat) pseudogene (POM121L1P), non-coding RNA [NR_024591]                         | 4.50101 | up | 4.82413  | up | 284.25183  | 65.39221   | 257.48587  | 47.06519   | Detected | Detected    | Detected    | Detected    |
| 1163 | A_33_P3666884 | PNPLA7       | Hs.294147 | patatin-like phospholipase domain containing 7                                   | Homo sapiens patatin-like phospholipase domain containing 7 (PNPLA7), transcript variant 1, mRNA [NM_001098537]                   | 4.49943 | up | 9.98095  | up | 3373.47400 | 776.34210  | 2216.74830 | 195.84381  | Detected | Detected    | Detected    | Detected    |
| 1164 | A_24_P375322  | GGT8P        | Hs.650223 | gamma-glutamyltransferase 8 pseudogene                                           | Homo sapiens gamma-glutamyltransferase 8 pseudogene (GGT8P), non-coding RNA [NR_003503]                                           | 4.49157 | up | 2.52102  | up | 16.26524   | 3.74969    | 15.05574   | 5.26612    | Detected | Compromised | Compromised | Compromised |
| 1165 | A_33_P3244610 | SIRPD        | Hs.664861 | signal-regulatory protein delta                                                  | Homo sapiens signal-regulatory protein delta (SIRPD), mRNA [NM_178460]                                                            | 4.49093 | up | 11.70869 | up | 26.55673   | 6.12310    | 34.94795   | 2.63196    | Detected | Compromised | Detected    | Compromised |
| 1166 | A_33_P3283684 | C7orf31      | Hs.122055 | chromosome 7 open reading frame 31                                               | Homo sapiens chromosome 7 open reading frame 31 (C7orf31), mRNA [NM_138811]                                                       | 4.48947 | up | 1.36484  | up | 13.55404   | 3.12612    | 7.41918    | 4.79336    | Detected | Compromised | Compromised | Compromised |
| 1167 | A_33_P3626301 | DPY19L2P1    | Hs.594815 | dpy-19-like 2 pseudogene 1 (C. elegans)                                          | Homo sapiens dpy-19-like 2 pseudogene 1 (C. elegans), mRNA (cDNA clone IMAGE:4838596), [BC066987]                                 | 4.48487 | up | 2.47980  | up | 42.05948   | 9.71062    | 44.21146   | 15.72116   | Detected | Compromised | Detected    | Detected    |
| 1168 | A_33_P3233440 |              |           |                                                                                  |                                                                                                                                   | 4.48261 | up | 3.07988  | up | 66.54591   | 15.37176   | 50.42661   | 14.43746   | Detected | Compromised | Detected    | Detected    |
| 1169 | A_23_P411806  | SLC44A1      | Hs.573495 | solute carrier family 44, member 1                                               | Homo sapiens solute carrier family 44, member 1 (SLC44A1), mRNA [NM_080546]                                                       | 4.48095 | up | 4.22385  | up | 2725.93000 | 629.90826  | 2734.24050 | 570.81310  | Detected | Detected    | Detected    | Detected    |
| 1170 | A_23_P106806  | PRSS27       | Hs.332878 | protease, serine 27                                                              | Homo sapiens protease, serine 27 (PRSS27), mRNA [NM_031948]                                                                       | 4.47995 | up | 5.36422  | up | 105.59972  | 24.40746   | 116.40633  | 19.13533   | Detected | Detected    | Detected    | Detected    |
| 1171 | A_23_P2920    | SERPINA3     | Hs.534293 | serpin peptidase inhibitor, clade A (alpha-1 antitrypsin, antitrypsin), member 3 | Homo sapiens serpin peptidase inhibitor, clade A (alpha-1 antitrypsin, antitrypsin), member 3 (SERPINA3), mRNA [NM_001085]        | 4.47337 | up | 5.27765  | up | 209.56696  | 48.50884   | 232.33983  | 38.81937   | Detected | Detected    | Detected    | Detected    |
| 1172 | A_23_P115064  | CRABP2       | Hs.405662 | cellular retinoic acid binding protein 2                                         | Homo sapiens cellular retinoic acid binding protein 2 (CRABP2), mRNA [NM_001878]                                                  | 4.47245 | up | 3.91688  | up | 1767.93600 | 409.31204  | 1529.48240 | 344.32623  | Detected | Detected    | Detected    | Detected    |
| 1173 | A_23_P333038  | C10orf79     | Hs.288927 | chromosome 10 open reading frame 79                                              | Homo sapiens chromosome 10 open reading frame 79 (C10orf79), mRNA [NM_025145]                                                     | 4.46829 | up | 4.00524  | up | 13.92773   | 3.22755    | 12.23256   | 2.69312    | Detected | Compromised | Compromised | Compromised |
| 1174 | A_24_P191971  | SAP30L       | Hs.592566 | SAP30-like                                                                       | Homo sapiens SAP30-like (SAP30L), transcript variant 1, mRNA [NM_024632]                                                          | 4.46575 | up | 4.62594  | up | 1838.99610 | 426.40234  | 1366.40560 | 260.46250  | Detected | Detected    | Detected    | Detected    |
| 1175 | A_33_P3421200 | hCG_1990547  | Hs.656318 | family with sequence similarity 86, member A pseudogene                          | Homo sapiens family with sequence similarity 86, member A pseudogene (FLJ10661), transcript variant 2, non-coding RNA [NR_024361] | 4.46268 | up | 4.35454  | up | 932.64290  | 216.39775  | 849.52783  | 172.02876  | Detected | Detected    | Detected    | Detected    |
| 1176 | A_23_P52227   | GDF10        | Hs.2171   | growth differentiation factor 10                                                 | Homo sapiens growth differentiation factor 10 (GDF10), mRNA [NM_004982]                                                           | 4.46201 | up | 14.17792 | up | 53.35391   | 12.38138   | 45.57743   | 2.83467    | Detected | Compromised | Detected    | Compromised |
| 1177 | A_33_P3238290 | FAM65C       | Hs.372578 | family with sequence similarity 65, member C                                     | Homo sapiens family with sequence similarity 65, member C (FAM65C), mRNA [NM_080829]                                              | 4.46131 | up | 4.36510  | up | 5840.50340 | 1355.56650 | 4975.03120 | 1005.00250 | Detected | Detected    | Detected    | Detected    |

|      |               |           |           |                                                                                        |                                                                                                                                                           |         |    |         |    |             |             |             |             |          |             |             |             |
|------|---------------|-----------|-----------|----------------------------------------------------------------------------------------|-----------------------------------------------------------------------------------------------------------------------------------------------------------|---------|----|---------|----|-------------|-------------|-------------|-------------|----------|-------------|-------------|-------------|
| 1178 | A_23_P257834  | ALB       | Hs.418167 | albumin                                                                                | Homo sapiens albumin (ALB), mRNA [NM_000477]                                                                                                              | 4.45567 | up | 4.83850 | up | 38.35960    | 8.91443     | 38.92801    | 7.09442     | Detected | Compromised | Detected    | Compromised |
| 1179 | A_23_P31721   | E2F5      | Hs.445758 | E2F transcription factor 5, p130-binding                                               | Homo sapiens E2F transcription factor 5, p130-binding (E2F5), transcript variant 1, mRNA [NM_001951]                                                      | 4.45418 | up | 3.32628 | up | 99.44153    | 23.11706    | 67.42403    | 17.87401    | Detected | Detected    | Detected    | Compromised |
| 1180 | A_24_P826348  | ZC3H6     | Hs.190477 | zinc finger COCH-type containing 6                                                     | Homo sapiens zinc finger COCH-type containing 6 (ZC3H6), mRNA [NM_198581]                                                                                 | 4.44850 | up | 4.90789 | up | 1192.37680  | 277.54504   | 625.84990   | 112.44510   | Detected | Detected    | Detected    | Detected    |
| 1181 | A_23_P42909   | TMEM139   | Hs.17558  | transmembrane protein 139                                                              | Homo sapiens transmembrane protein 139 (TMEM139), mRNA [NM_153345]                                                                                        | 4.44751 | up | 1.80420 | up | 13.19684    | 3.07246     | 5.20544     | 2.54412     | Detected | Compromised | Compromised | Compromised |
| 1182 | A_33_P3254082 |           | Hs.179615 |                                                                                        | Uncharacterized protein C9orf68 [Source:UniProtKB/Swiss-Prot;Acc:Q8N4H0] [ENST00000381890]                                                                | 4.44720 | up | 4.39126 | up | 13.67299    | 3.18354     | 23.88859    | 4.79697     | Detected | Compromised | Detected    | Compromised |
| 1183 | A_24_P144439  | EFHB      | Hs.670883 | EF-hand domain family, member B                                                        | Homo sapiens EF-hand domain family, member B (EFHB), mRNA [NM_144715]                                                                                     | 4.44714 | up | 4.12205 | up | 16.02420    | 3.73103     | 15.17499    | 3.24624     | Detected | Compromised | Compromised | Compromised |
| 1184 | A_32_P66222   | ANKRD20A2 | Hs.632663 | ankyrin repeat domain 20 family, member A2                                             | Homo sapiens ankyrin repeat domain 20 family, member A2 (ANKRD20A2), mRNA [NM_001012421]                                                                  | 4.44635 | up | 1.41156 | up | 16.25730    | 3.78598     | 9.40287     | 5.87389     | Detected | Compromised | Compromised | Compromised |
| 1185 | A_23_P303803  | C19orf18  | Hs.134209 | chromosome 19 open reading frame 18                                                    | Homo sapiens chromosome 19 open reading frame 18 (C19orf18), mRNA [NM_152474]                                                                             | 4.44557 | up | 5.64619 | up | 275.15582   | 64.08912    | 216.96654   | 33.88465    | Detected | Detected    | Detected    | Detected    |
| 1186 | A_33_P3228591 |           | Hs.632807 |                                                                                        | WD repeat domain phosphoinositide-interacting protein 4 (WIP4)/WD repeat-containing protein 45 [Source:UniProtKB/Swiss-Prot;Acc:Q9Y484] [ENST00000376358] | 4.44493 | up | 3.11226 | up | 70.93971    | 16.52561    | 52.24096    | 14.80132    | Detected | Compromised | Detected    | Compromised |
| 1187 | A_33_P3231670 |           |           |                                                                                        |                                                                                                                                                           | 4.44409 | up | 4.45574 | up | 490.95578   | 114.39117   | 608.64026   | 120.44980   | Detected | Detected    | Detected    | Detected    |
| 1188 | A_33_P3305731 | NINL      | Hs.631508 | ninein-like                                                                            | Homo sapiens ninein-like (NINL), mRNA [NM_025176]                                                                                                         | 4.44301 | up | 3.47479 | up | 159.46797   | 37.16459    | 126.57566   | 32.12083    | Detected | Detected    | Detected    | Detected    |
| 1189 | A_23_P61580   | NSUN6     | Hs.396175 | NOL1/NOP2/Sun domain family, member 6                                                  | Homo sapiens NOL1/NOP2/Sun domain family, member 6 (NSUN6), mRNA [NM_182543]                                                                              | 4.44232 | up | 3.96747 | up | 493.22990   | 114.96678   | 437.74265   | 97.29054    | Detected | Detected    | Detected    | Detected    |
| 1190 | A_23_P323094  | PHC1      | Hs.305985 | polyhomeotic homolog 1 (Drosophila)                                                    | Homo sapiens polyhomeotic homolog 1 (Drosophila) (PHC1), mRNA [NM_004426]                                                                                 | 4.44099 | up | 4.90303 | up | 188.86420   | 44.03547    | 144.88390   | 26.05678    | Detected | Detected    | Detected    | Detected    |
| 1191 | A_33_P3813128 | SEMA3F    | Hs.32981  | sema domain, immunoglobulin domain (Ig), short basic domain, secreted, (semaphorin) 3F | Homo sapiens sema domain, immunoglobulin domain (Ig), short basic domain, secreted, (semaphorin) 3F (SEMA3F), mRNA [NM_004186]                            | 4.43996 | up | 3.74454 | up | 987.31440   | 230.25525   | 767.37750   | 180.70735   | Detected | Detected    | Detected    | Detected    |
| 1192 | A_33_P3392787 | CCDC147   | Hs.253576 | coiled-coil domain containing 147                                                      | Homo sapiens coiled-coil domain containing 147 (CCDC147), mRNA [NM_001008723]                                                                             | 4.43922 | up | 2.20240 | up | 86.56288    | 20.19100    | 61.93649    | 24.79793    | Detected | Detected    | Detected    | Detected    |
| 1193 | A_23_P258190  | AKR1B1    | Hs.521212 | aldo-keto reductase family 1, member B1 (aldose reductase)                             | Homo sapiens aldo-keto reductase family 1, member B1 (aldose reductase) (AKR1B1), mRNA [NM_001628]                                                        | 4.43563 | up | 3.87189 | up | 59975.41800 | 14000.75700 | 68133.56000 | 15516.85800 | Detected | Detected    | Detected    | Detected    |
| 1194 | A_24_P362881  | IFT57     | Hs.412196 | intraflagellar transport 57 homolog (Chlamydomonas)                                    | Homo sapiens intraflagellar transport 57 homolog (Chlamydomonas) (IFT57), mRNA [NM_018010]                                                                | 4.42352 | up | 6.38181 | up | 54.98898    | 12.87185    | 55.07467    | 7.60981     | Detected | Compromised | Detected    | Compromised |
| 1195 | A_33_P3212630 | FAM90A10  | Hs.715411 | family with sequence similarity 90, member A10                                         | Homo sapiens family with sequence similarity 90, member A10 (FAM90A10), mRNA [NM_001164447]                                                               | 4.42294 | up | 3.97358 | up | 94.24470    | 22.06375    | 100.14470   | 22.22345    | Detected | Detected    | Detected    | Detected    |
| 1196 | A_33_P3298810 | FFAR3     | Hs.248055 | free fatty acid receptor 3                                                             | Homo sapiens free fatty acid receptor 3 (FFAR3), mRNA [NM_005304]                                                                                         | 4.42044 | up | 2.92052 | up | 22.33439    | 5.23169     | 31.04200    | 9.37250     | Detected | Compromised | Detected    | Compromised |
| 1197 | A_33_P3313830 | FLJ33630  | Hs.340623 | hypothetical LOC644873                                                                 | Homo sapiens hypothetical LOC644873 (FLJ33630), non-coding RNA [NR_015360]                                                                                | 4.41738 | up | 4.52622 | up | 612.39510   | 143.54910   | 435.59793   | 84.86240    | Detected | Detected    | Detected    | Detected    |
| 1198 | A_23_P208400  | ADCK4     | Hs.130712 | aarF domain containing kinase 4                                                        | Homo sapiens aarF domain containing kinase 4 (ADCK4), transcript variant 1, mRNA [NM_024876]                                                              | 4.41649 | up | 3.21060 | up | 177.98210   | 41.72846    | 171.90611   | 47.21402    | Detected | Detected    | Detected    | Detected    |
| 1199 | A_32_P129419  | NARG2     | Hs.200943 | NMDA receptor regulated 2                                                              | Homo sapiens NMDA receptor regulated 2 (NARG2), transcript variant 1, mRNA [NM_024611]                                                                    | 4.41490 | up | 3.77737 | up | 127.11490   | 29.81319    | 60.29860    | 14.07613    | Detected | Detected    | Detected    | Compromised |
| 1200 | A_32_P101570  | SUGT1L1   | Hs.442781 | SGT1, suppressor of G2 allele of SKP1 like 1 (S. cerevisiae)                           | Homo sapiens SGT1, suppressor of G2 allele of SKP1 like 1 (S. cerevisiae) (SUGT1L1), non-coding RNA [NR_003365]                                           | 4.41347 | up | 5.33544 | up | 21.74824    | 5.10243     | 15.97699    | 2.64052     | Detected | Compromised | Detected    | Compromised |
| 1201 | A_24_P106794  | NUDCD1    | Hs.380291 | NudC domain containing 1                                                               | Homo sapiens NudC domain containing 1 (NUDCD1), transcript variant 1, mRNA [NM_032869]                                                                    | 4.41189 | up | 4.45024 | up | 347.13248   | 81.47108    | 192.71810   | 38.18600    | Detected | Detected    | Detected    | Detected    |
| 1202 | A_23_P64689   | PAN2      | Hs.273397 | PAN2 poly(A) specific ribonuclease subunit homolog (S. cerevisiae)                     | Homo sapiens PAN2 poly(A) specific ribonuclease subunit homolog (S. cerevisiae) (PAN2), transcript variant 3, mRNA [NM_014871]                            | 4.41070 | up | 4.58343 | up | 610.54224   | 143.33139   | 390.88320   | 75.20065    | Detected | Detected    | Detected    | Detected    |
| 1203 | A_33_P3248957 | LOC441493 | Hs.496083 | hypothetical LOC441493                                                                 | PREDICTED: Homo sapiens hypothetical LOC441493 (LOC441493), miscRNA [XR_017739]                                                                           | 4.40354 | up | 2.17923 | up | 15.01440    | 3.53053     | 7.41246     | 2.99934     | Detected | Compromised | Compromised | Compromised |
| 1204 | A_24_P30141   | C10orf4   | Hs.658192 | chromosome 10 open reading frame 4                                                     | Homo sapiens chromosome 10 open reading frame 4 (C10orf4), mRNA [NM_145246]                                                                               | 4.40277 | up | 3.58398 | up | 68.40400    | 16.08749    | 41.50301    | 10.21126    | Detected | Compromised | Detected    | Compromised |
| 1205 | A_33_P3741059 | LOC284475 | Hs.196026 | hypothetical protein LOC284475                                                         | Homo sapiens mRNA; cDNA DKFP667K053 (from clone DKFP667K053) [AL832882]                                                                                   | 4.40084 | up | 1.82108 | up | 39.15750    | 9.21325     | 20.03738    | 9.70236     | Detected | Compromised | Detected    | Compromised |
| 1206 | A_24_P396702  | CD302     | Hs.130014 | CD302 molecule                                                                         | Homo sapiens CD302 molecule (CD302), mRNA [NM_014890]                                                                                                     | 4.39995 | up | 4.57333 | up | 1640.19020  | 385.99304   | 1189.57090  | 229.36284   | Detected | Detected    | Detected    | Detected    |
| 1207 | A_23_P320862  | C9orf43   | Hs.632691 | chromosome 9 open reading frame 43                                                     | Homo sapiens chromosome 9 open reading frame 43 (C9orf43), mRNA [NM_152786]                                                                               | 4.39602 | up | 2.56760 | up | 49.57161    | 11.67632    | 52.58179    | 18.05815    | Detected | Compromised | Detected    | Detected    |
| 1208 | A_23_P165707  | LYG1      | Hs.164589 | lysozyme G-like 1                                                                      | Homo sapiens lysozyme G-like 1 (LYG1), mRNA [NM_174898]                                                                                                   | 4.39179 | up | 4.08880 | up | 201.61037   | 47.53405    | 205.81415   | 44.38588    | Detected | Detected    | Detected    | Detected    |



|      |               |              |           |                                                                     |                                                                                                                                   |         |    |         |    |             |            |             |            |          |             |             |             |
|------|---------------|--------------|-----------|---------------------------------------------------------------------|-----------------------------------------------------------------------------------------------------------------------------------|---------|----|---------|----|-------------|------------|-------------|------------|----------|-------------|-------------|-------------|
| 1209 | A_23_P25030   | HSD17B6      | Hs.524513 | hydroxysteroid (17-beta) dehydrogenase 6 homolog (mouse)            | Homo sapiens hydroxysteroid (17-beta) dehydrogenase 6 homolog (mouse) (HSD17B6), mRNA [NM_003725]                                 | 4.39041 | up | 4.50660 | up | 243.50665   | 57.42999   | 261.99920   | 51.26448   | Detected | Detected    | Detected    | Detected    |
| 1210 | A_23_P81825   | GUCA1B       | Hs.446529 | guanylate cyclase activator 1B (retina)                             | Homo sapiens guanylate cyclase activator 1B (retina) (GUCA1B), mRNA [NM_002098]                                                   | 4.38951 | up | 3.91763 | up | 37.69983    | 8.89317    | 21.89507    | 4.92820    | Detected | Compromised | Detected    | Compromised |
| 1211 | A_24_P400604  | RBMY1B       | Hs.536001 | RNA binding motif protein, Y-linked, family 1, member B             | Homo sapiens RNA binding motif protein, Y-linked, family 1, member B (RBMY1B), mRNA [NM_001006121]                                | 4.38691 | up | 3.32146 | up | 16.17409    | 3.81763    | 12.24152    | 3.24992    | Detected | Compromised | Compromised | Compromised |
| 1212 | A_33_P3298206 | PPP4R4       | Hs.259599 | protein phosphatase 4, regulatory subunit 4                         | Homo sapiens protein phosphatase 4, regulatory subunit 4 (PPP4R4), transcript variant 2, mRNA [NM_020958]                         | 4.37958 | up | 9.95245 | up | 41.84698    | 9.89384    | 35.81535    | 3.17325    | Detected | Compromised | Detected    | Compromised |
| 1213 | A_23_P419213  | KIAA1407     | Hs.477159 | KIAA1407                                                            | Homo sapiens KIAA1407 (KIAA1407), mRNA [NM_020817]                                                                                | 4.37442 | up | 4.46658 | up | 176.56757   | 41.79492   | 175.95824   | 34.73760   | Detected | Detected    | Detected    | Detected    |
| 1214 | A_23_P43490   | CDKN2A       | Hs.512599 | cyclin-dependent kinase inhibitor 2A (melanoma, p16, inhibits CDK4) | Homo sapiens cyclin-dependent kinase inhibitor 2A (melanoma, p16, inhibits CDK4) (CDKN2A), transcript variant 3, mRNA [NM_058197] | 4.37423 | up | 4.62509 | up | 23289.71300 | 5513.09960 | 23008.87000 | 4386.72460 | Detected | Detected    | Detected    | Detected    |
| 1215 | A_23_P151046  | KLRC1        | Hs.512576 | killer cell lectin-like receptor subfamily C, member 1              | Homo sapiens killer cell lectin-like receptor subfamily C, member 1 (KLRC1), transcript variant 1, mRNA [NM_002259]               | 4.37060 | up | 5.27064 | up | 14.72006    | 3.48740    | 17.74364    | 2.96856    | Detected | Compromised | Detected    | Compromised |
| 1216 | A_33_P3272948 | C17orf107    | Hs.579243 | chromosome 17 open reading frame 107                                | Homo sapiens chromosome 17 open reading frame 107 (C17orf107), mRNA [NM_001145536]                                                | 4.37005 | up | 4.55362 | up | 634.48846   | 150.33842  | 535.32460   | 103.66349  | Detected | Detected    | Detected    | Detected    |
| 1217 | A_32_P394951  | NTN5         | Hs.326217 | netrin 5                                                            | Homo sapiens netrin 5 (NTN5), mRNA [NM_145807]                                                                                    | 4.36515 | up | 4.00559 | up | 27.43268    | 6.50733    | 26.73481    | 5.88539    | Detected | Compromised | Detected    | Compromised |
| 1218 | A_33_P3407235 | LOC100133180 | Hs.709917 | similar to DEAD (Asp-Glu-Ala-Asp) box polypeptide 3, Y-linked       | PREDICTED: Homo sapiens similar to DEAD (Asp-Glu-Ala-Asp) box polypeptide 3, Y-linked (LOC100133180), miscRNA [XR_037576]         | 4.36188 | up | 4.77797 | up | 335.97278   | 79.75597   | 57.15229    | 10.54766   | Detected | Detected    | Detected    | Compromised |
| 1219 | A_24_P941359  | FAM65B       | Hs.559459 | family with sequence similarity 65, member B                        | Homo sapiens family with sequence similarity 65, member B (FAM65B), transcript variant 1, mRNA [NM_014722]                        | 4.36111 | up | 4.99454 | up | 284.77618   | 67.61446   | 188.60900   | 33.29909   | Detected | Detected    | Detected    | Detected    |
| 1220 | A_33_P3415888 | TEPP         | Hs.132976 | testis, prostate and placenta expressed                             | Homo sapiens testis, prostate and placenta expressed (TEPP), transcript variant 1, mRNA [NM_199046]                               | 4.35862 | up | 1.71749 | up | 14.53949    | 3.45409    | 5.85059     | 3.00379    | Detected | Compromised | Compromised | Compromised |
| 1221 | A_23_P98205   | CHST1        | Hs.104576 | carbohydrate (keratan sulfate Gal-6) sulfotransferase 1             | Homo sapiens carbohydrate (keratan sulfate Gal-6) sulfotransferase 1 (CHST1), mRNA [NM_003654]                                    | 4.35462 | up | 8.60330 | up | 208.01633   | 49.46301   | 142.28868   | 14.58380   | Detected | Detected    | Detected    | Detected    |
| 1222 | A_23_P106661  | CMTM1        | Hs.698621 | CKLF-like MARVEL transmembrane domain containing 1                  | Homo sapiens CKLF-like MARVEL transmembrane domain containing 1 (CMTM1), transcript variant 17, mRNA [NM_029999]                  | 4.35042 | up | 4.72062 | up | 799.86930   | 190.37970  | 729.16110   | 136.20396  | Detected | Detected    | Detected    | Detected    |
| 1223 | A_32_P118568  | RFPL1S       | Hs.167750 | RFPL1 antisense RNA (non-protein coding)                            | Homo sapiens RFPL1 antisense RNA (non-protein coding) (RFPL1S), antisense RNA [NR_002727]                                         | 4.34595 | up | 9.34787 | up | 43.10982    | 10.27129   | 31.32931    | 2.95532    | Detected | Compromised | Detected    | Compromised |
| 1224 | A_32_P114003  | LOC100192378 | Hs.596420 | hypothetical LOC100192378                                           | Homo sapiens hypothetical LOC100192378 (LOC100192378), non-coding RNA [NR_024360]                                                 | 4.34358 | up | 1.23009 | up | 13.69514    | 3.26477    | 3.77483     | 2.70599    | Detected | Compromised | Compromised | Compromised |
| 1225 | A_33_P3222451 |              | Hs.628396 |                                                                     | Proline-rich AKT1 substrate 1 (40 kDa proline-rich AKT substrate) [Source:UniProtKB/Swiss-Prot;Acc:Q96536] [ENST00000391830]      | 4.34012 | up | 2.87848 | up | 17.10599    | 4.08113    | 18.05234    | 5.53013    | Detected | Compromised | Detected    | Compromised |
| 1226 | A_24_P14932   | WDR52        | Hs.584936 | WD repeat domain 52                                                 | Homo sapiens WD repeat domain 52 (WDR52), transcript variant 2, mRNA [NM_018338]                                                  | 4.33225 | up | 3.61970 | up | 13.55816    | 3.24056    | 10.82542    | 2.63717    | Detected | Compromised | Compromised | Compromised |
| 1227 | A_33_P3831566 |              | Hs.667154 |                                                                     | Homo sapiens HSFE-1 mRNA, partial cds. [AF072164]                                                                                 | 4.32906 | up | 3.83749 | up | 204.75128   | 48.97406   | 115.23281   | 26.47856   | Detected | Detected    | Detected    | Detected    |
| 1228 | A_23_P419107  | TOP11L2      | Hs.696047 | t-complex 11 (mouse)-like 2                                         | Homo sapiens t-complex 11 (mouse)-like 2 (TOP11L2), mRNA [NM_152772]                                                              | 4.32646 | up | 3.18550 | up | 155.06088   | 37.11098   | 147.00056   | 40.69178   | Detected | Detected    | Detected    | Detected    |
| 1229 | A_33_P3209537 | EBF4         | Hs.471955 | early B-cell factor 4                                               | Homo sapiens early B-cell factor 4 (EBF4), mRNA [NM_001110514]                                                                    | 4.32379 | up | 8.94597 | up | 377.44170   | 90.38952   | 345.10098   | 34.01606   | Detected | Detected    | Detected    | Detected    |
| 1230 | A_24_P45476   | XCL1         | Hs.546295 | chemokine (C motif) ligand 1                                        | Homo sapiens chemokine (C motif) ligand 1 (XCL1), mRNA [NM_002995]                                                                | 4.32246 | up | 1.34091 | up | 17.33644    | 4.15300    | 5.57219     | 3.66432    | Detected | Compromised | Compromised | Compromised |
| 1231 | A_23_P66827   | FAM106A      | Hs.674403 | family with sequence similarity 106, member A                       | Homo sapiens family with sequence similarity 106, member A (FAM106A), non-coding RNA [NR_026809]                                  | 4.32029 | up | 2.54521 | up | 17.14978    | 4.11035    | 12.76762    | 4.42336    | Detected | Compromised | Compromised | Compromised |
| 1232 | A_33_P3256952 | EGLN3        | Hs.135507 | egl nine homolog 3 (C. elegans)                                     | Homo sapiens egl nine homolog 3 (C. elegans) (EGLN3), mRNA [NM_022073]                                                            | 4.31928 | up | 7.13851 | up | 32.55422    | 7.80420    | 25.16468    | 3.10849    | Detected | Compromised | Detected    | Compromised |
| 1233 | A_33_P3359084 | TAS1R3       |           | taste receptor, type 1, member 3                                    | Taste receptor type 1 member 3 Precursor (Sweet taste receptor T1R3) [Source:UniProtKB/Swiss-Prot;Acc:Q7RTX0] [ENST00000339381]   | 4.31672 | up | 4.97339 | up | 142.18000   | 34.10497   | 131.86534   | 23.37994   | Detected | Detected    | Detected    | Detected    |
| 1234 | A_33_P3412087 | C6orf97      | Hs.660044 | chromosome 6 open reading frame 97                                  | Homo sapiens chromosome 6 open reading frame 97 (C6orf97), mRNA [NM_025059]                                                       | 4.30243 | up | 3.96715 | up | 223.97046   | 53.90266   | 189.53763   | 42.12913   | Detected | Detected    | Detected    | Detected    |
| 1235 | A_23_P207003  | SEPT4        | Hs.287518 | septin 4                                                            | Homo sapiens septin 4 (SEPT4), transcript variant 1, mRNA [NM_004574]                                                             | 4.29982 | up | 3.07146 | up | 22.97934    | 5.53376    | 19.66872    | 5.64674    | Detected | Compromised | Detected    | Compromised |
| 1236 | A_23_P33583   | DNAH7        | Hs.97403  | dynein, axonemal, heavy chain 7                                     | Homo sapiens dynein, axonemal, heavy chain 7 (DNAH7), mRNA [NM_018897]                                                            | 4.29871 | up | 4.08467 | up | 53.21900    | 12.81922   | 45.18938    | 9.75539    | Detected | Compromised | Detected    | Compromised |
| 1237 | A_33_P3217317 | C14orf81     | Hs.650220 | chromosome 14 open reading frame 81                                 | Homo sapiens cDNA FLJ32169 fis, clone PLACE6000523. [AK056731]                                                                    | 4.29232 | up | 2.99681 | up | 15.65985    | 3.77771    | 13.40368    | 3.94395    | Detected | Compromised | Detected    | Compromised |
| 1238 | A_33_P3344204 | ZDHHC11      | Hs.654874 | zinc finger, DHHC-type containing 11                                | Homo sapiens zinc finger, DHHC-type containing 11 (ZDHHC11), mRNA [NM_024786]                                                     | 4.29081 | up | 3.28568 | up | 297.60416   | 71.81793   | 211.07822   | 56.64791   | Detected | Detected    | Detected    | Detected    |

|      |               |           |           |                                                                               |                                                                                                                                                                               |         |    |         |            |           |            |           |          |             |             |             |
|------|---------------|-----------|-----------|-------------------------------------------------------------------------------|-------------------------------------------------------------------------------------------------------------------------------------------------------------------------------|---------|----|---------|------------|-----------|------------|-----------|----------|-------------|-------------|-------------|
| 1239 | A_23_P103756  | OVGP1     | Hs.1154   | oviductal glycoprotein 1, 120kDa                                              | Homo sapiens oviductal glycoprotein 1, 120kDa (OVGP1), mRNA [NM_002557]                                                                                                       | 4.28728 | up | 4.06465 | 703.40180  | 169.88507 | 609.74320  | 132.27867 | Detected | Detected    | Detected    | Detected    |
| 1240 | A_24_P230938  |           | Hs.217409 |                                                                               | MORN repeat-containing protein 4 (Protein 44050) [Source:UniProtKB/Swiss-Prot;Acc:Q8ND04] [ENST00000370635]                                                                   | 4.28257 | up | 4.60970 | 1809.74100 | 437.56790 | 1637.10850 | 313.16312 | Detected | Detected    | Detected    | Detected    |
| 1241 | A_24_P100830  | AMN1      | Hs.591146 | antagonist of mitotic exit network 1 homolog (S. cerevisiae)                  | Homo sapiens antagonist of mitotic exit network 1 homolog (S. cerevisiae) (AMN1), transcript variant 1, mRNA [NM_001113402]                                                   | 4.28182 | up | 5.83566 | 243.64899  | 58.92087  | 175.91446  | 26.58136  | Detected | Detected    | Detected    | Detected    |
| 1242 | A_23_P207345  | ADAM11    | Hs.6088   | ADAM metallopeptidase domain 11                                               | Homo sapiens ADAM metallopeptidase domain 11 (ADAM11), mRNA [NM_002390]                                                                                                       | 4.28102 | up | 2.31261 | 18.49724   | 4.47397   | 27.62122   | 10.53186  | Detected | Compromised | Detected    | Compromised |
| 1243 | A_33_P3232955 | TDRD1     | Hs.333132 | tudor domain containing 1                                                     | Homo sapiens tudor domain containing 1 (TDRD1), mRNA [NM_198795]                                                                                                              | 4.27767 | up | 9.34267 | 52.20979   | 12.63799  | 37.70708   | 3.55891   | Detected | Compromised | Detected    | Compromised |
| 1244 | A_24_P520767  | LOC149351 | Hs.546492 | hypothetical protein LOC149351                                                | Homo sapiens cDNA FLJ12836 fis. clone NTZRP2003206 [AK022886]                                                                                                                 | 4.27678 | up | 5.77382 | 304.43420  | 73.70721  | 288.58423  | 44.07320  | Detected | Detected    | Detected    | Detected    |
| 1245 | A_33_P3327063 | STRC      | Hs.657395 | stereocilin                                                                   | Homo sapiens stereocilin (STRC), mRNA [NM_153700]                                                                                                                             | 4.27340 | up | 3.72085 | 13.81736   | 3.34800   | 11.87717   | 2.81472   | Detected | Compromised | Compromised | Compromised |
| 1246 | A_33_P332521  | PCDHA3    | Hs.199343 | protocadherin alpha 3                                                         | Homo sapiens protocadherin alpha 3 (PCDHA3), transcript variant 2, mRNA [NM_031497]                                                                                           | 4.27089 | up | 9.24623 | 69.75982   | 16.91298  | 54.74779   | 5.22117   | Detected | Compromised | Detected    | Compromised |
| 1247 | A_33_P3401701 | EDNRA     | Hs.183713 | endothelin receptor type A                                                    | Homo sapiens endothelin receptor type A (EDNRA), transcript variant 1, mRNA [NM_001957]                                                                                       | 4.26784 | up | 4.23394 | 302.80350  | 73.46599  | 232.20662  | 48.36105  | Detected | Detected    | Detected    | Detected    |
| 1248 | A_33_P3323218 | ALS2CR8   | Hs.444982 | amyotrophic lateral sclerosis 2 (juvenile) chromosome region, candidate 8     | Homo sapiens amyotrophic lateral sclerosis 2 (juvenile) chromosome region, candidate 8 (ALS2CR8), mRNA [NM_024744]                                                            | 4.26391 | up | 1.72678 | 302.18063  | 73.38234  | 185.46985  | 94.71148  | Detected | Detected    | Detected    | Detected    |
| 1249 | A_24_P14260   | CARD8     | Hs.446146 | caspase recruitment domain family, member 8                                   | Homo sapiens caspase recruitment domain family, member 8 (CARD8), mRNA [NM_014959]                                                                                            | 4.26280 | up | 3.94065 | 216.15434  | 52.50522  | 189.69969  | 42.44869  | Detected | Detected    | Detected    | Detected    |
| 1250 | A_24_P409800  | KCTD16    | Hs.661870 | potassium channel tetramerisation domain containing 16                        | Homo sapiens potassium channel tetramerisation domain containing 16 (KCTD16), mRNA [NM_020768]                                                                                | 4.25931 | up | 1.77734 | 14.80215   | 3.59848   | 15.21657   | 7.54938   | Detected | Compromised | Detected    | Compromised |
| 1251 | A_33_P3365408 | UNQ2963   | Hs.246046 | hypothetical LOC283314                                                        | Homo sapiens hypothetical LOC283314 (LOC283314), non-coding RNA [NR_026947]                                                                                                   | 4.25869 | up | 4.26358 | 51.41370   | 12.50075  | 25.30603   | 5.23378   | Detected | Compromised | Detected    | Compromised |
| 1252 | A_33_P3361546 | TFAP2A    | Hs.519880 | transcription factor AP-2 alpha (activating enhancer binding protein 2 alpha) | Homo sapiens transcription factor AP-2 alpha (activating enhancer binding protein 2 alpha) (TFAP2A), transcript variant 2, mRNA [NM_001032280]                                | 4.25285 | up | 3.35815 | 12.67772   | 3.08670   | 13.38969   | 3.51590   | Detected | Compromised | Detected    | Compromised |
| 1253 | A_23_P309619  | KIAA1671  | Hs.419171 | KIAA1671                                                                      | Homo sapiens KIAA1671 (KIAA1671), mRNA [NM_001145206]                                                                                                                         | 4.24529 | up | 4.65462 | 152.44044  | 37.18138  | 103.03821  | 19.52000  | Detected | Detected    | Detected    | Detected    |
| 1254 | A_23_P368484  | C17orf76  | Hs.25425  | chromosome 17 open reading frame 76                                           | Homo sapiens chromosome 17 open reading frame 76 (C17orf76), transcript variant 2, mRNA [NM_207387]                                                                           | 4.24506 | up | 4.74111 | 123.88449  | 30.21804  | 111.58860  | 20.75418  | Detected | Detected    | Detected    | Detected    |
| 1255 | A_24_P22079   | FOXO1     | Hs.370666 | forkhead box O1                                                               | Homo sapiens forkhead box O1 (FOXO1), mRNA [NM_002015]                                                                                                                        | 4.23472 | up | 4.89830 | 1664.30000 | 406.94894 | 1473.73840 | 265.30220 | Detected | Detected    | Detected    | Detected    |
| 1256 | A_33_P3213362 | CASC2     | Hs.89387  | cancer susceptibility candidate 2                                             | Homo sapiens cancer susceptibility candidate 2 (CASC2), transcript variant 1, non-coding RNA [NR_026939]                                                                      | 4.23409 | up | 4.69759 | 226.79146  | 55.46254  | 180.87760  | 33.95279  | Detected | Detected    | Detected    | Detected    |
| 1257 | A_23_P69383   | PARP9     | Hs.518200 | poly (ADP-ribose) polymerase family, member 9                                 | Homo sapiens poly (ADP-ribose) polymerase family, member 9 (PARP9), transcript variant 1, mRNA [NM_031458]                                                                    | 4.23395 | up | 4.01104 | 901.21246  | 220.40175 | 801.56946  | 176.21770 | Detected | Detected    | Detected    | Detected    |
| 1258 | A_23_P96271   | MYO1      | Hs.464469 | myomesin 1, 185kDa                                                            | Homo sapiens myomesin 1, 185kDa (MYO1), transcript variant 1, mRNA [NM_003803]                                                                                                | 4.23158 | up | 2.77341 | 40.11065   | 9.81500   | 37.11859   | 11.80164  | Detected | Compromised | Detected    | Compromised |
| 1259 | A_33_P3346473 | PHF21A    | Hs.502458 | PHD finger protein 21A                                                        | Homo sapiens PHD finger protein 21A (PHF21A), transcript variant 1, mRNA [NM_001101802]                                                                                       | 4.23113 | up | 4.78180 | 1713.12930 | 419.24420 | 623.53040  | 114.98240 | Detected | Detected    | Detected    | Detected    |
| 1260 | A_33_P3329750 |           |           |                                                                               |                                                                                                                                                                               | 4.23058 | up | 2.93927 | 32.80483   | 8.02918   | 33.68646   | 10.10606  | Detected | Compromised | Detected    | Compromised |
| 1261 | A_23_P145935  | EPHB6     | Hs.380089 | EPH receptor B6                                                               | Homo sapiens EPH receptor B6 (EPHB6), mRNA [NM_004445]                                                                                                                        | 4.23037 | up | 3.76165 | 376.65836  | 92.19390  | 474.44800  | 111.21818 | Detected | Detected    | Detected    | Detected    |
| 1262 | A_33_P3324383 | FIGLN2    | Hs.648218 | figletin-like 2                                                               | Homo sapiens figletin-like 2 (FIGLN2), mRNA [NM_001013690]                                                                                                                    | 4.22780 | up | 4.14428 | 318.77966  | 78.07452  | 238.73192  | 50.79574  | Detected | Detected    | Detected    | Detected    |
| 1263 | A_32_P213661  | CCDC122   | Hs.170849 | coiled-coil domain containing 122                                             | Homo sapiens coiled-coil domain containing 122 (CCDC122), mRNA [NM_144974]                                                                                                    | 4.22606 | up | 3.90342 | 333.25146  | 81.65242  | 184.68288  | 41.72022  | Detected | Detected    | Detected    | Detected    |
| 1264 | A_23_P121106  | HESX1     | Hs.171980 | HESX homeobox 1                                                               | Homo sapiens HESX homeobox 1 (HESX1), mRNA [NM_003865]                                                                                                                        | 4.22427 | up | 8.36301 | 68.82225   | 16.86980  | 65.66126   | 6.92329   | Detected | Detected    | Detected    | Compromised |
| 1265 | A_24_P212481  | MCTP1     | Hs.655087 | multiple C2 domains, transmembrane 1                                          | Homo sapiens multiple C2 domains, transmembrane 1 (MCTP1), transcript variant L, mRNA [NM_024717]                                                                             | 4.22266 | up | 3.51481 | 317.66730  | 77.89672  | 247.94930  | 62.20525  | Detected | Detected    | Detected    | Detected    |
| 1266 | A_23_P24535   | TTC12     | Hs.288772 | tetratricopeptide repeat domain 12                                            | Homo sapiens tetratricopeptide repeat domain 12 (TTC12), mRNA [NM_017868]                                                                                                     | 4.22221 | up | 4.07287 | 973.86630  | 238.83199 | 858.95120  | 185.96600 | Detected | Detected    | Detected    | Detected    |
| 1267 | A_33_P3388810 |           | Hs.480085 |                                                                               | Fucose-1-phosphate guanylyltransferase (EC 2.7.7.30)(GDP-L-fucose pyrophosphorylase)(GDP-L-fucose diphosphorylase) [Source:UniProtKB/Swiss-Prot;Acc:O14772] [ENST00000370895] | 4.21929 | up | 4.15450 | 363.03560  | 89.09296  | 360.86264  | 76.59300  | Detected | Detected    | Detected    | Detected    |
| 1268 | A_24_P759477  | ITGB8     | Hs.592171 | integrin, beta 8                                                              | Homo sapiens integrin, beta 8 (ITGB8), mRNA [NM_002214]                                                                                                                       | 4.21200 | up | 3.25778 | 177.05466  | 43.52636  | 80.70503   | 21.84463  | Detected | Detected    | Detected    | Detected    |

|      |               |           |           |                                                                                   |                                                                                                                             |         |    |         |    |              |             |              |             |          |             |             |             |
|------|---------------|-----------|-----------|-----------------------------------------------------------------------------------|-----------------------------------------------------------------------------------------------------------------------------|---------|----|---------|----|--------------|-------------|--------------|-------------|----------|-------------|-------------|-------------|
| 1269 | A_23_P55356   | VMO1      | Hs.122561 | vitelline membrane outer layer 1 homolog (chicken)                                | Homo sapiens vitelline membrane outer layer 1 homolog (chicken) (VMO1), transcript variant 1, mRNA [NM_182566]              | 4.20626 | up | 3.30434 | up | 150.18779    | 36.97193    | 222.73726    | 59.43932    | Detected | Detected    | Detected    | Detected    |
| 1270 | A_23_P77135   | ATPBD4    | Hs.107196 | ATP binding domain 4                                                              | Homo sapiens ATP binding domain 4 (ATPBD4), transcript variant 1, mRNA [NM_006550]                                          | 4.20308 | up | 2.94112 | up | 52.67199     | 12.97613    | 49.46977     | 14.83178    | Detected | Compromised | Detected    | Detected    |
| 1271 | A_23_P89431   | CCL2      | Hs.303649 | chemokine (C-C motif) ligand 2                                                    | Homo sapiens chemokine (C-C motif) ligand 2 (CCL2), mRNA [NM_002982]                                                        | 4.20265 | up | 4.26056 | up | 1433.46640   | 353.18146   | 1353.83640   | 280.19830   | Detected | Detected    | Detected    | Detected    |
| 1272 | A_33_P3413840 | GK        | Hs.1466   | glycerol kinase                                                                   | Homo sapiens glycerol kinase (GK), transcript variant 3, mRNA [NM_001128127]                                                | 4.20101 | up | 4.37331 | up | 1398.76310   | 344.76514   | 703.70966    | 141.88902   | Detected | Detected    | Detected    | Detected    |
| 1273 | A_23_P152047  | SCAMP5    | Hs.374180 | secretory carrier membrane protein 5                                              | Homo sapiens secretory carrier membrane protein 5 (SCAMP5), mRNA [NM_138967]                                                | 4.19923 | up | 4.04478 | up | 246.35417    | 60.74674    | 203.43346    | 44.34990    | Detected | Detected    | Detected    | Detected    |
| 1274 | A_23_P150555  | SCGB1D2   | Hs.204096 | secretoglobin, family 1D, member 2                                                | Homo sapiens secretoglobin, family 1D, member 2 (SCGB1D2), mRNA [NM_006551]                                                 | 4.19636 | up | 4.36102 | up | 21.28573     | 5.25230     | 16.61231     | 3.35898     | Detected | Compromised | Detected    | Compromised |
| 1275 | A_24_P274814  | TBXAS1    | Hs.520757 | thromboxane A synthase 1 (platelet)                                               | Homo sapiens thromboxane A synthase 1 (platelet) (TBXAS1), transcript variant 2, mRNA [NM_030984]                           | 4.19410 | up | 8.27205 | up | 449.25684    | 110.91463   | 419.25920    | 44.69256    | Detected | Detected    | Detected    | Detected    |
| 1276 | A_24_P418408  | FAM89A    | Hs.38516  | family with sequence similarity 89, member A                                      | Homo sapiens family with sequence similarity 89, member A (FAM89A), mRNA [NM_198552]                                        | 4.19108 | up | 4.32402 | up | 6070.43850   | 1499.78000  | 4641.85800   | 946.60740   | Detected | Detected    | Detected    | Detected    |
| 1277 | A_32_P309404  | SLC22A3   | Hs.567337 | solute carrier family 22 (extraneuronal monoamine transporter), member 3          | Homo sapiens solute carrier family 22 (extraneuronal monoamine transporter), member 3 (SLC22A3), mRNA [NM_021977]           | 4.19067 | up | 2.17335 | up | 14.26344     | 3.52431     | 7.30801      | 2.96508     | Detected | Compromised | Compromised | Compromised |
| 1278 | A_23_P334328  | LAMB4     | Hs.62022  | laminin, beta 4                                                                   | Homo sapiens laminin, beta 4 (LAMB4), mRNA [NM_007356]                                                                      | 4.19035 | up | 2.94441 | up | 14.78204     | 3.65273     | 10.30638     | 3.08655     | Detected | Compromised | Compromised | Compromised |
| 1279 | A_24_P131173  | C1orf115  | Hs.519839 | chromosome 1 open reading frame 115                                               | Homo sapiens chromosome 1 open reading frame 115 (C1orf115), mRNA [NM_024709]                                               | 4.18514 | up | 2.67618 | up | 145.61519    | 36.02716    | 116.87350    | 38.50933    | Detected | Detected    | Detected    | Detected    |
| 1280 | A_23_P327483  | SPATA6    | Hs.538103 | spermatogenesis associated 6                                                      | Homo sapiens spermatogenesis associated 6 (SPATA6), mRNA [NM_019073]                                                        | 4.18350 | up | 4.11182 | up | 407.93903    | 100.96921   | 373.56552    | 80.11219    | Detected | Detected    | Detected    | Detected    |
| 1281 | A_23_P70746   | AHI1      | Hs.386684 | Abelson helper integration site 1                                                 | Homo sapiens Abelson helper integration site 1 (AHI1), transcript variant 2, mRNA [NM_017651]                               | 4.18281 | up | 4.08390 | up | 465.91443    | 115.33756   | 303.56808    | 65.54598    | Detected | Detected    | Detected    | Detected    |
| 1282 | A_33_P3266429 | SAMD13    | Hs.591445 | sterile alpha motif domain containing 13                                          | Homo sapiens sterile alpha motif domain containing 13 (SAMD13), transcript variant 1, mRNA [NM_001010971]                   | 4.18197 | up | 2.49187 | up | 12.74593     | 3.15591     | 7.53123      | 2.66505     | Detected | Compromised | Compromised | Compromised |
| 1283 | A_23_P94533   | CTSL1     | Hs.418123 | cathepsin L1                                                                      | Homo sapiens cathepsin L1 (CTSL1), transcript variant 1, mRNA [NM_001912]                                                   | 4.17921 | up | 3.98334 | up | 166162.97000 | 41169.31600 | 148621.38000 | 32900.24600 | Detected | Detected    | Detected    | Detected    |
| 1284 | A_24_P315921  |           |           |                                                                                   |                                                                                                                             | 4.17001 | up | 4.23989 | up | 948.86220    | 235.61275   | 1090.01460   | 226.69583   | Detected | Detected    | Detected    | Detected    |
| 1285 | A_23_P436048  | LPAR3     | Hs.674915 | lysophosphatidic acid receptor 3                                                  | Homo sapiens lysophosphatidic acid receptor 3 (LPAR3), mRNA [NM_012152]                                                     | 4.16962 | up | 6.15561 | up | 11.89851     | 2.95480     | 16.90189     | 2.42119     | Detected | Compromised | Detected    | Compromised |
| 1286 | A_33_P3331437 | ZNF518A   | Hs.600823 | zinc finger protein 518A                                                          | Homo sapiens zinc finger protein 518A (ZNF518A), mRNA [NM_014803]                                                           | 4.16530 | up | 2.39922 | up | 49.41702     | 12.28466    | 27.61905     | 10.15088    | Detected | Compromised | Detected    | Compromised |
| 1287 | A_23_P502336  | EMR2      | Hs.531619 | egf-like module containing, mucin-like, hormone receptor-like 2                   | Homo sapiens egf-like module containing, mucin-like, hormone receptor-like 2 (EMR2), transcript variant 1, mRNA [NM_013447] | 4.16358 | up | 6.96068 | up | 121.46176    | 30.20690    | 103.78359    | 13.14748    | Detected | Detected    | Detected    | Compromised |
| 1288 | A_33_P3436646 | LOC151657 | Hs.587187 | hypothetical protein LOC151657                                                    | Homo sapiens cDNA FLJ33795 fis, clone CTONG100009 [AK091114]                                                                | 4.16341 | up | 1.94435 | up | 35.25608     | 8.76835     | 19.69265     | 8.93090     | Detected | Compromised | Detected    | Compromised |
| 1289 | A_23_P65230   | TMTC4     | Hs.190983 | transmembrane and tetratricopeptide repeat containing 4                           | Homo sapiens transmembrane and tetratricopeptide repeat containing 4 (TMTC4), transcript variant 1, mRNA [NM_032813]        | 4.15981 | up | 4.24639 | up | 1967.65900   | 489.78950   | 1605.23330   | 333.33740   | Detected | Detected    | Detected    | Detected    |
| 1290 | A_23_P32404   | ISG20     | Hs.459265 | interferon stimulated exonuclease gene 20kDa                                      | Homo sapiens interferon stimulated exonuclease gene 20kDa (ISG20), mRNA [NM_002201]                                         | 4.15756 | up | 4.38343 | up | 9246.77800   | 2302.95200  | 9035.14300   | 1817.55050  | Detected | Detected    | Detected    | Detected    |
| 1291 | A_23_P29153   | RTDR1     | Hs.526920 | rhabdoid tumor deletion region gene 1                                             | Homo sapiens rhabdoid tumor deletion region gene 1 (RTDR1), mRNA [NM_014433]                                                | 4.15382 | up | 5.27717 | up | 120.39317    | 30.01149    | 124.28970    | 20.76825    | Detected | Detected    | Detected    | Detected    |
| 1292 | A_33_P3280694 |           |           |                                                                                   | Protein pigeon homolog [Source:UniProtKB/Swiss-Prot;Acc:A4D1B5] [ENST0000334003]                                            | 4.15292 | up | 4.00454 | up | 254.03325    | 63.33889    | 154.05493    | 33.92256    | Detected | Detected    | Detected    | Detected    |
| 1293 | A_32_P19294   | GLT1D1    | Hs.655668 | glycosyltransferase 1 domain containing 1                                         | Homo sapiens glycosyltransferase 1 domain containing 1 (GLT1D1), mRNA [NM_144689]                                           | 4.15165 | up | 2.12770 | up | 15.58739     | 3.88763     | 7.90697      | 3.27692     | Detected | Compromised | Compromised | Compromised |
| 1294 | A_33_P3263867 | P2RX7     | Hs.507102 | purinergic receptor P2X, ligand-gated ion channel, 7                              | Homo sapiens purinergic receptor P2X, ligand-gated ion channel, 7 (P2RX7), mRNA [NM_002562]                                 | 4.14758 | up | 4.18541 | up | 156.49123    | 39.06867    | 132.26050    | 27.86493    | Detected | Detected    | Detected    | Detected    |
| 1295 | A_33_P3387621 | RHPN2     | Hs.466435 | rhophilin, Rho GTPase binding protein 2                                           | Homo sapiens rhophilin, Rho GTPase binding protein 2 (RHPN2), mRNA [NM_033103]                                              | 4.14416 | up | 4.04402 | up | 779.31090    | 194.71843   | 712.31840    | 155.31970   | Detected | Detected    | Detected    | Detected    |
| 1296 | A_32_P209230  | CITED4    | Hs.355820 | Cbp/p300-interacting transactivator, with Glu/Asp-rich carboxy-terminal domain, 4 | Homo sapiens Cbp/p300-interacting transactivator, with Glu/Asp-rich carboxy-terminal domain, 4 (CITED4), mRNA [NM_133467]   | 4.14223 | up | 4.14959 | up | 22435.80000  | 5608.42400  | 22865.22300  | 4858.88130  | Detected | Detected    | Detected    | Detected    |
| 1297 | A_33_P3414880 | LOC339192 | Hs.560498 | hypothetical protein LOC339192                                                    | PREDICTED: Homo sapiens hypothetical protein LOC339192 (LOC339192), mRNA [XM_001726300]                                     | 4.14170 | up | 7.49634 | up | 160.01030    | 40.00394    | 170.36528    | 20.03998    | Detected | Detected    | Detected    | Detected    |
| 1298 | A_24_P944827  | ATG7      | Hs.38032  | ATG7 autophagy related 7 homolog (S. cerevisiae)                                  | Homo sapiens ATG7 autophagy related 7 homolog (S. cerevisiae) (ATG7), transcript variant 1, mRNA [NM_006395]                | 4.14148 | up | 3.94967 | up | 352.01746    | 88.01202    | 309.09262    | 69.00704    | Detected | Detected    | Detected    | Detected    |

|      |               |          |           |                                                                                                            |                                                                                                                                                                      |         |    |         |    |             |             |             |            |          |             |             |             |
|------|---------------|----------|-----------|------------------------------------------------------------------------------------------------------------|----------------------------------------------------------------------------------------------------------------------------------------------------------------------|---------|----|---------|----|-------------|-------------|-------------|------------|----------|-------------|-------------|-------------|
| 1299 | A_33_P3229370 | ID4      | Hs.519601 | inhibitor of DNA binding 4, dominant negative helix-loop-helix protein (ID4), mRNA [NM_001546]             | Homo sapiens inhibitor of DNA binding 4, dominant negative helix-loop-helix protein (ID4), mRNA [NM_001546]                                                          | 4.13577 | up | 4.56578 | up | 1238.90590  | 310.18090   | 990.65704   | 191.32608  | Detected | Detected    | Detected    | Detected    |
| 1300 | A_23_P502350  | RFX2     | Hs.465709 | regulatory factor X, 2 (influences HLA class II expression) (RFX2), transcript variant 1, mRNA [NM_006935] | Homo sapiens regulatory factor X, 2 (influences HLA class II expression) (RFX2), transcript variant 1, mRNA [NM_006935]                                              | 4.13359 | up | 4.08139 | up | 1625.21860  | 407.11523   | 1509.00260  | 326.02222  | Detected | Detected    | Detected    | Detected    |
| 1301 | A_33_P3254460 | DLK2     | Hs.337251 | delta-like 2 homolog (Drosophila)                                                                          | Homo sapiens delta-like 2 homolog (Drosophila) (DLK2), transcript variant 2, mRNA [NM_206539]                                                                        | 4.13284 | up | 3.82540 | up | 292.87988   | 73.37940    | 308.35610   | 71.07905   | Detected | Detected    | Detected    | Detected    |
| 1302 | A_24_P372223  | MSR1     | Hs.147635 | macrophage scavenger receptor 1                                                                            | Homo sapiens macrophage scavenger receptor 1 (MSR1), transcript variant SR-AL, mRNA [NM_138715]                                                                      | 4.12681 | up | 2.27988 | up | 12.20193    | 3.06159     | 9.12126     | 3.52783    | Detected | Compromised | Compromised | Compromised |
| 1303 | A_32_P128701  | USP53    | Hs.431081 | ubiquitin specific peptidase 53                                                                            | Homo sapiens ubiquitin specific peptidase 53 (USP53), mRNA [NM_019050]                                                                                               | 4.12625 | up | 4.01253 | up | 2448.41300  | 614.41600   | 1730.34560  | 380.25986  | Detected | Detected    | Detected    | Detected    |
| 1304 | A_33_P3221999 | GSDMB    | Hs.306777 | gasdermin B                                                                                                | Homo sapiens gasdermin B (GSDMB), transcript variant 3, mRNA [NM_001165958]                                                                                          | 4.12451 | up | 4.23170 | up | 827.25714   | 207.68341   | 649.26166   | 135.29141  | Detected | Detected    | Detected    | Detected    |
| 1305 | A_24_P364057  | C11orf70 | Hs.98328  | chromosome 11 open reading frame 70                                                                        | Homo sapiens chromosome 11 open reading frame 70 (C11orf70), mRNA [NM_032930]                                                                                        | 4.12170 | up | 4.05795 | up | 668.40900   | 167.91855   | 543.42224   | 118.08538  | Detected | Detected    | Detected    | Detected    |
| 1306 | A_23_P150249  | CCDC85B  | Hs.66713  | coiled-coil domain containing 85B                                                                          | Homo sapiens coiled-coil domain containing 85B (CCDC85B), mRNA [NM_006848]                                                                                           | 4.12125 | up | 3.58539 | up | 6420.67400  | 1613.18580  | 14881.96700 | 3660.07370 | Detected | Detected    | Detected    | Detected    |
| 1307 | A_33_P3232718 | UACA     | Hs.108049 | uveal autoantigen with coiled-coil domains and ankryrin repeats                                            | Homo sapiens uveal autoantigen with coiled-coil domains and ankryrin repeats (UACA), transcript variant 2, mRNA [NM_001008224]                                       | 4.12033 | up | 4.01461 | up | 2155.06670  | 541.57935   | 1601.09480  | 351.67346  | Detected | Detected    | Detected    | Detected    |
| 1308 | A_32_P188860  | IL17RD   | Hs.150725 | interleukin 17 receptor D                                                                                  | Homo sapiens interleukin 17 receptor D (IL17RD), mRNA [NM_017563]                                                                                                    | 4.11834 | up | 4.81212 | up | 510.33313   | 128.31130   | 305.19950   | 55.92594   | Detected | Detected    | Detected    | Detected    |
| 1309 | A_33_P3421084 | FLJ42289 | Hs.136982 | hypothetical LOC388182                                                                                     | Homo sapiens hypothetical LOC388182 (FLJ42289), transcript variant 1, non-coding RNA [NR_028139]                                                                     | 4.11570 | up | 4.46446 | up | 31.21387    | 7.85303     | 40.69748    | 8.03830    | Detected | Compromised | Detected    | Compromised |
| 1310 | A_23_P113393  | APLN     | Hs.303084 | apelin                                                                                                     | Homo sapiens apelin (APLN), mRNA [NM_017413]                                                                                                                         | 4.11289 | up | 4.04194 | up | 148.97510   | 37.50589    | 118.28753   | 25.80565   | Detected | Detected    | Detected    | Detected    |
| 1311 | A_33_P3289810 |          |           |                                                                                                            |                                                                                                                                                                      | 4.11142 | up | 1.73361 | up | 19.60316    | 4.93705     | 17.76529    | 9.03620    | Detected | Compromised | Detected    | Compromised |
| 1312 | A_33_P3355040 | MGC21881 | Hs.459704 | hypothetical locus MGC21881                                                                                | z556g04.r1 Soares fetal liver spleen_1NFLS.S1 Homo sapiens cDNA clone IMAGE446550.5 similar to contains element MER12 repetitive element ., mRNA sequence [AA203336] | 4.10819 | up | 4.87983 | up | 286.07500   | 72.10458    | 183.35406   | 33.13226   | Detected | Detected    | Detected    | Detected    |
| 1313 | A_32_P8551    | NRN1L    | Hs.435464 | neurtin 1-like                                                                                             | Homo sapiens neurtin 1-like (NRN1L), mRNA [NM_198443]                                                                                                                | 4.10699 | up | 3.97228 | up | 142.99129   | 36.05116    | 113.14838   | 25.11734   | Detected | Detected    | Detected    | Detected    |
| 1314 | A_24_P277615  | TRIM7    | Hs.487412 | tripartite motif-containing 7                                                                              | Homo sapiens tripartite motif-containing 7 (TRIM7), transcript variant 2, mRNA [NM_203297]                                                                           | 4.10586 | up | 4.03536 | up | 98.68065    | 24.88635    | 112.85958   | 24.66164   | Detected | Detected    | Detected    | Detected    |
| 1315 | A_33_P3407941 |          |           |                                                                                                            |                                                                                                                                                                      | 4.10562 | up | 1.41118 | up | 31.80863    | 8.02232     | 8.85773     | 5.53483    | Detected | Compromised | Compromised | Compromised |
| 1316 | A_24_P168398  | ZNF177   | Hs.172979 | zinc finger protein 177                                                                                    | Homo sapiens zinc finger protein 177 (ZNF177), mRNA [NM_003451]                                                                                                      | 4.10288 | up | 3.62436 | up | 231.35315   | 58.38754    | 148.67000   | 36.41404   | Detected | Detected    | Detected    | Detected    |
| 1317 | A_33_P3308137 | C7orf46  | Hs.592178 | chromosome 7 open reading frame 46                                                                         | Homo sapiens chromosome 7 open reading frame 46 (C7orf46), transcript variant 1, mRNA [NM_199136]                                                                    | 4.10065 | up | 5.71734 | up | 125.83962   | 31.77587    | 122.19788   | 18.84670   | Detected | Detected    | Detected    | Detected    |
| 1318 | A_23_P141992  | HSD11B1L | Hs.631840 | hydroxysteroid (11-beta) dehydrogenase 1-like                                                              | Homo sapiens hydroxysteroid (11-beta) dehydrogenase 1-like (HSD11B1L), transcript variant b, mRNA [NM_198706]                                                        | 4.10043 | up | 3.77967 | up | 2259.72800  | 570.63730   | 2025.16770  | 472.46844  | Detected | Detected    | Detected    | Detected    |
| 1319 | A_33_P3520835 | FLJ41455 | Hs.494023 | hypothetical gene supported by AK123449; BX641014                                                          | Homo sapiens cDNA FLJ41455 fis, clone BRSTN2012284 [AK123449]                                                                                                        | 4.10035 | up | 3.87664 | up | 81.45468    | 20.56972    | 37.69471    | 8.57414    | Detected | Detected    | Detected    | Compromised |
| 1320 | A_23_P83134   | GAS1     | Hs.65029  | growth arrest-specific 1                                                                                   | Homo sapiens growth arrest-specific 1 (GAS1), mRNA [NM_002048]                                                                                                       | 4.09816 | up | 3.93629 | up | 15664.98700 | 3957.98410  | 14627.56400 | 3276.80000 | Detected | Detected    | Detected    | Detected    |
| 1321 | A_32_P68942   | C21orf81 | Hs.364456 | ankyrin repeat domain 20 family, member A3 pseudogene                                                      | Homo sapiens chromosome 21 open reading frame 81 (C21orf81), non-coding RNA [NR_027270]                                                                              | 4.09706 | up | 1.77122 | up | 11.97424    | 3.02628     | 6.22913     | 3.10114    | Detected | Compromised | Compromised | Compromised |
| 1322 | A_23_P62298   | NLGN3    | Hs.438877 | neuroligin 3                                                                                               | Homo sapiens neuroligin 3 (NLGN3), transcript variant 2, mRNA [NM_018977]                                                                                            | 4.09360 | up | 2.16533 | up | 12.61127    | 3.18997     | 6.56902     | 2.67511    | Detected | Compromised | Compromised | Compromised |
| 1323 | A_23_P406785  | C9orf50  | Hs.124223 | chromosome 9 open reading frame 50                                                                         | Homo sapiens chromosome 9 open reading frame 50 (C9orf50), mRNA [NM_198350]                                                                                          | 4.09283 | up | 4.37074 | up | 586.85736   | 148.47101   | 793.08380   | 160.00354  | Detected | Detected    | Detected    | Detected    |
| 1324 | A_33_P3222977 | TEKT5    | Hs.143519 | tektin 5                                                                                                   | Homo sapiens tektin 5 (TEKT5), mRNA [NM_144674]                                                                                                                      | 4.08990 | up | 2.06141 | up | 32.39949    | 8.20273     | 23.08075    | 9.87305    | Detected | Compromised | Detected    | Compromised |
| 1325 | A_33_P3287631 | CTSB     | Hs.520898 | cathepsin B                                                                                                | Homo sapiens cathepsin B (CTSB), transcript variant 2, mRNA [NM_147780]                                                                                              | 4.08864 | up | 3.73594 | up | 43379.19000 | 10985.90100 | 35090.57400 | 8282.38800 | Detected | Detected    | Detected    | Detected    |
| 1326 | A_32_P150632  | ANXA11   |           | annexin A11                                                                                                | Annexin A11 (Annexin-11)(Annexin XI)(Calycylin-associated annexin 50)(CAP-50)(56 kDa autoantigen) [Source:UniProtKB/SwissProt;Acc:P50995] [ENST00000372234]          | 4.08387 | up | 4.29261 | up | 255.22713   | 64.71246    | 196.91203   | 40.44983   | Detected | Detected    | Detected    | Detected    |
| 1327 | A_33_P3259443 |          | Hs.635230 |                                                                                                            | Putative uncharacterized protein ENSP00000340488 Fragment [Source:UniProtKB/TrEMBL;Acc:A6NL95] [ENST00000338857]                                                     | 4.08331 | up | 3.12634 | up | 102.07733   | 25.88511    | 15.45255    | 4.35843    | Detected | Detected    | Detected    | Compromised |
| 1328 | A_33_P3301351 | RBM44    | Hs.720233 | RNA binding motif protein 44                                                                               | Homo sapiens RNA binding motif protein 44 (RBM44), mRNA [NM_001080504]                                                                                               | 4.08319 | up | 3.94047 | up | 87.92421    | 22.29676    | 69.63701    | 15.58324   | Detected | Detected    | Detected    | Detected    |
| 1329 | A_24_P218688  | ALDH3B1  | Hs.523841 | aldehyde dehydrogenase 3 family, member B1                                                                 | Homo sapiens aldehyde dehydrogenase 3 family, member B1 (ALDH3B1), transcript variant 1, mRNA [NM_000694]                                                            | 4.08207 | up | 3.26276 | up | 1859.22300  | 471.61070   | 1401.24890  | 378.70032  | Detected | Detected    | Detected    | Detected    |

|      |               |              |           |                                                                    |                                                                                                                                                                  |         |    |          |    |             |            |             |            |          |             |              |             |
|------|---------------|--------------|-----------|--------------------------------------------------------------------|------------------------------------------------------------------------------------------------------------------------------------------------------------------|---------|----|----------|----|-------------|------------|-------------|------------|----------|-------------|--------------|-------------|
| 1330 | A_32.P199884  | HORMAD1      | Hs.298312 | HORMA domain containing 1                                          | Homo sapiens HORMA domain containing 1 (HORMAD1), mRNA [NM_032132]                                                                                               | 4.07748 | up | 4.72932  | up | 14.39697    | 3.65606    | 16.56413    | 3.08841    | Detected | Compromised | Detected     | Compromised |
| 1331 | A_23.P103398  | PSEN2        | Hs.25363  | presenilin 2 (Alzheimer disease 4)                                 | Homo sapiens presenilin 2 (Alzheimer disease 4) (PSEN2), transcript variant 1, mRNA [NM_000447]                                                                  | 4.07392 | up | 3.70755  | up | 9182.99600  | 2334.02200 | 6278.15140  | 1493.17300 | Detected | Detected    | Detected     | Detected    |
| 1332 | A_23.P214533  | ZNF323       | Hs.656413 | zinc finger protein 323                                            | Homo sapiens zinc finger protein 323 (ZNF323), transcript variant 1, mRNA [NM_030899]                                                                            | 4.07361 | up | 2.45691  | up | 16.14028    | 4.10265    | 10.10185    | 3.62558    | Detected | Compromised | Compromised  | Compromised |
| 1333 | A_33.P3361388 | MYCBPAP      | Hs.398196 | MYCBP associated protein                                           | Homo sapiens MYCBP associated protein (MYCBPAP), mRNA [NM_032133]                                                                                                | 4.07168 | up | 3.47633  | up | 28.68038    | 7.29365    | 17.27950    | 4.38304    | Detected | Compromised | Detected     | Compromised |
| 1334 | A_24.P400457  | CYB5RL       | Hs.591426 | cytochrome b5 reductase-like                                       | Homo sapiens cytochrome b5 reductase-like (CYB5RL), mRNA [NM_001031672]                                                                                          | 4.06960 | up | 4.96759  | up | 76.25545    | 19.40226   | 35.40360    | 6.28445    | Detected | Detected    | Detected     | Compromised |
| 1335 | A_24.P36229   | DTNA         | Hs.643454 | dystrobrevin, alpha                                                | Homo sapiens dystrobrevin, alpha (DTNA), transcript variant 3, mRNA [NM_001391]                                                                                  | 4.06691 | up | 2.88156  | up | 23.37894    | 5.95242    | 21.00159    | 6.42674    | Detected | Compromised | Detected     | Compromised |
| 1336 | A_33.P3384885 |              |           |                                                                    | Zinc finger protein 511 [Source:UniProtKB/Swiss-Prot;Acc:O8NB15][ENST00000359035]                                                                                | 4.06382 | up | 4.24033  | up | 452.78350   | 115.36909  | 370.71100   | 77.09063   | Detected | Detected    | Detected     | Detected    |
| 1337 | A_23.P410110  | C10orf25     | Hs.655124 | chromosome 10 open reading frame 25                                | Homo sapiens chromosome 10 open reading frame 25 (C10orf25), mRNA [NM_001039380]                                                                                 | 4.06193 | up | 3.49894  | up | 142.40912   | 36.30266   | 141.09029   | 35.55708   | Detected | Detected    | Detected     | Detected    |
| 1338 | A_23.P353014  | CACNA2D4     | Hs.13768  | calcium channel, voltage-dependent, alpha 2/delta subunit 4        | Homo sapiens calcium channel, voltage-dependent, alpha 2/delta subunit 4 (CACNA2D4), mRNA [NM_172364]                                                            | 4.05274 | up | 3.06964  | up | 31.74249    | 8.11009    | 27.10278    | 7.78559    | Detected | Compromised | Detected     | Compromised |
| 1339 | A_33.P3408137 | LOC100130248 | Hs.656333 | hypothetical protein LOC100130248                                  | Homo sapiens cDNA FLJ42222 fis, clone HTYMUJ2039411, [AK124216]                                                                                                  | 4.05169 | up | 1.25403  | up | 16.73500    | 4.27684    | 8.58857     | 6.03917    | Detected | Compromised | Compromised  | Compromised |
| 1340 | A_23.P9280    | LOC389765    | Hs.601256 | kinesin family member 27 pseudogene                                | Homo sapiens kinesin family member 27 pseudogene (LOC389765), non-coding RNA [NR_029410]                                                                         | 4.04717 | up | 4.83612  | up | 371.47488   | 95.04108   | 216.14198   | 39.41015   | Detected | Detected    | Detected     | Detected    |
| 1341 | A_23.P10542   | HTRA3        | Hs.479119 | HtrA serine peptidase 3                                            | Homo sapiens HtrA serine peptidase 3 (HTRA3), mRNA [NM_053044]                                                                                                   | 4.04434 | up | 3.12971  | up | 256.98322   | 65.79461   | 263.47887   | 74.23415   | Detected | Detected    | Detected     | Detected    |
| 1342 | A_23.P339119  | ACSS3        | Hs.259559 | acyl-CoA synthetase short-chain family member 3                    | Homo sapiens acyl-CoA synthetase short-chain family member 3 (ACSS3), mRNA [NM_024560]                                                                           | 4.03627 | up | 4.00633  | up | 1371.28470  | 351.78787  | 1364.29370  | 300.28000  | Detected | Detected    | Detected     | Detected    |
| 1343 | A_23.P145074  | PNRC1        | Hs.75969  | proline-rich nuclear receptor coactivator 1                        | Homo sapiens proline-rich nuclear receptor coactivator 1 (PNRC1), mRNA [NM_006813]                                                                               | 4.03392 | up | 3.98440  | up | 31909.37700 | 8190.75440 | 17985.02000 | 3980.28320 | Detected | Detected    | Detected     | Detected    |
| 1344 | A_33.P3376264 |              |           |                                                                    | Glycerol kinase (EC 2.7.1.30)(ATP-glycerol 3-phosphotransferase)(Glycerokinase)(GK) [Source:UniProtKB/Swiss-Prot;Acc:P32189][ENST00000378938]                    | 4.02742 | up | 7.77081  | up | 70.70306    | 18.17792   | 38.59238    | 4.37926    | Detected | Detected    | Detected     | Compromised |
| 1345 | A_33.P3336622 | ALDH3A2      | Hs.499886 | aldehyde dehydrogenase 3 family, member A2                         | Homo sapiens aldehyde dehydrogenase 3 family, member A2 (ALDH3A2), transcript variant 1, mRNA [NM_001031806]                                                     | 4.02699 | up | 4.16222  | up | 4356.19240  | 1120.10580 | 3473.77150  | 735.93850  | Detected | Detected    | Detected     | Detected    |
| 1346 | A_23.P69109   | PLSCR1       | Hs.130759 | phospholipid scramblase 1                                          | Homo sapiens phospholipid scramblase 1 (PLSCR1), mRNA [NM_021105]                                                                                                | 4.02646 | up | 4.19947  | up | 4864.03560  | 1250.85280 | 3857.17550  | 809.91670  | Detected | Detected    | Detected     | Detected    |
| 1347 | A_33.P3249936 | C3orf67      | Hs.368434 | chromosome 3 open reading frame 67                                 | Homo sapiens chromosome 3 open reading frame 67 (C3orf67), mRNA [NM_198463]                                                                                      | 4.01730 | up | 4.32566  | up | 485.95013   | 125.25383  | 328.04327   | 66.87203   | Detected | Detected    | Detected     | Detected    |
| 1348 | A_24.P26792   | TRPM6        | Hs.272225 | transient receptor potential cation channel, subfamily M, member 6 | Homo sapiens transient receptor potential cation channel, subfamily M, member 6 (TRPM6), mRNA [NM_017662]                                                        | 4.01522 | up | 1.43359  | up | 11.90988    | 3.07136    | 4.17710     | 2.56930    | Detected | Compromised | Compromised  | Compromised |
| 1349 | A_33.P3304133 | GLB1L2       | Hs.436178 | galactosidase, beta 1-like 2                                       | Homo sapiens galactosidase, beta 1-like 2 (GLB1L2), mRNA [NM_138342]                                                                                             | 4.01138 | up | 11.67637 | up | 44.24946    | 11.42213   | 48.24004    | 3.64305    | Detected | Compromised | Detected     | Compromised |
| 1350 | A_33.P3332970 | CLEC2B       | Hs.85201  | C-type lectin domain family 2, member B                            | Homo sapiens C-type lectin domain family 2, member B (CLEC2B), mRNA [NM_005127]                                                                                  | 4.00844 | up | 3.66369  | up | 6559.26900  | 1694.38760 | 6492.38000  | 1562.61010 | Detected | Detected    | Detected     | Detected    |
| 1351 | A_23.P417891  | ARHGEF7      | Hs.508738 | Rho guanine nucleotide exchange factor (GEF) 7                     | Homo sapiens Rho guanine nucleotide exchange factor (GEF) 7 (ARHGEF7), transcript variant 2, mRNA [NM_145735]                                                    | 4.00629 | up | 6.35238  | up | 36.89678    | 9.53628    | 19.34209    | 2.68493    | Detected | Compromised | Detected     | Compromised |
| 1352 | A_23.P160546  | FAM63A       | Hs.3346   | family with sequence similarity 63, member A                       | Homo sapiens family with sequence similarity 63, member A (FAM63A), transcript variant 2, mRNA [NM_001040217]                                                    | 4.00535 | up | 3.65973  | up | 1415.32710  | 365.88910  | 852.81430   | 205.48088  | Detected | Detected    | Detected     | Detected    |
| 1353 | A_24.P401830  | LOC100129196 | Hs.659751 | similar to hCG2033298                                              | Homo sapiens cDNA FLJ33163 fis, clone UTERU2005941, [AK057725]                                                                                                   | 4.00417 | up | 4.22292  | up | 228.31047   | 59.04005   | 140.88440   | 29.41816   | Detected | Detected    | Detected     | Detected    |
| 1354 | A_33.P3269919 | C1orf129     | Hs.591489 | chromosome 1 open reading frame 129                                | Homo sapiens chromosome 1 open reading frame 129 (C1orf129), transcript variant 2, mRNA [NM_025063]                                                              | 4.00251 | up | 3.98939  | up | 46.47594    | 12.02345   | 42.83126    | 9.46716    | Detected | Compromised | Detected     | Compromised |
| 1355 | A_33.P3285992 |              |           |                                                                    | Vitamin K epoxide reductase complex subunit 1 (EC 1.1.4.1)(Vitamin K1 2,3-epoxide reductase subunit 1) [Source:UniProtKB/Swiss-Prot;Acc:O9BQ86][ENST00000498155] | 4.00197 | up | 2.57884  | up | 39.51190    | 10.22320   | 49.21316    | 16.82763   | Detected | Compromised | Detected     | Detected    |
| 1356 | A_32.P213881  | C20orf202    | Hs.148503 | chromosome 20 open reading frame 202                               | Homo sapiens chromosome 20 open reading frame 202 (C20orf202), mRNA [NM_001009612]                                                                               | 4.00160 | up | 2.64357  | up | 14.37132    | 3.71874    | 9.80482     | 3.27050    | Detected | Compromised | Compromised  | Compromised |
| 1357 | A_23.P114185  | TSPAN7       | Hs.441664 | tetraspanin 7                                                      | Homo sapiens tetraspanin 7 (TSPAN7), mRNA [NM_004615]                                                                                                            | 4.00157 | up | 3.75845  | up | 13.22887    | 3.42315    | 12.42338    | 2.91472    | Detected | Compromised | Not Detected | Compromised |
| 1358 | A_23.P48295   | CDADC1       | Hs.388220 | cytidine and dCMP deaminase domain containing 1                    | Homo sapiens cytidine and dCMP deaminase domain containing 1 (CDADC1), mRNA [NM_030911]                                                                          | 3.99992 | up | 4.75412  | up | 145.79910   | 37.74307   | 91.41530    | 16.95566   | Detected | Detected    | Detected     | Detected    |

|      |               |              |           |                                                                                |                                                                                                                                                                       |         |    |          |    |             |            |             |            |          |             |             |             |
|------|---------------|--------------|-----------|--------------------------------------------------------------------------------|-----------------------------------------------------------------------------------------------------------------------------------------------------------------------|---------|----|----------|----|-------------|------------|-------------|------------|----------|-------------|-------------|-------------|
| 1359 | A_23_P133386  | RASGRF2      | Hs.162129 | Ras protein-specific guanine nucleotide-releasing factor 2                     | Homo sapiens Ras protein-specific guanine nucleotide-releasing factor 2 (RASGRF2), mRNA [NM_006909]                                                                   | 3.99407 | up | 12.18387 | up | 38.70342    | 10.03382   | 36.86875    | 2.66833    | Detected | Compromised | Detected    | Compromised |
| 1360 | A_33_P3354823 | BTBD19       | Hs.632400 | BTB (POZ) domain containing 19                                                 | Homo sapiens BTB (POZ) domain containing 19 (BTBD19), mRNA [NM_001136537]                                                                                             | 3.99304 | up | 1.16583  | up | 26.18178    | 6.78935    | 15.23083    | 11.52002   | Detected | Compromised | Compromised | Compromised |
| 1361 | A_32_P223210  | C7orf45      | Hs.351816 | chromosome 7 open reading frame 45                                             | Homo sapiens chromosome 7 open reading frame 45 (C7orf45), mRNA [NM_145286]                                                                                           | 3.98562 | up | 7.23435  | up | 25.53161    | 6.63309    | 30.59643    | 3.72938    | Detected | Compromised | Detected    | Compromised |
| 1362 | A_23_P385067  | CLIC6        | Hs.473695 | chloride intracellular channel 6                                               | Homo sapiens chloride intracellular channel 6 (CLIC6), mRNA [NM_053277]                                                                                               | 3.98175 | up | 4.47525  | up | 300.41122   | 78.12225   | 226.71584   | 44.67143   | Detected | Detected    | Detected    | Detected    |
| 1363 | A_23_P205046  | ANKRD10      | Hs.525163 | ankyrin repeat domain 10                                                       | Homo sapiens ankyrin repeat domain 10 (ANKRD10), mRNA [NM_017664]                                                                                                     | 3.97836 | up | 4.27421  | up | 2511.67580  | 653.72064  | 1506.67720  | 310.83487  | Detected | Detected    | Detected    | Detected    |
| 1364 | A_33_P3235053 | TRIM47       | Hs.293660 | tripartite motif-containing 47                                                 | Homo sapiens tripartite motif-containing 47 (TRIM47), mRNA [NM_033452]                                                                                                | 3.97826 | up | 4.52904  | up | 23924.12900 | 6226.96240 | 17745.28000 | 3454.95630 | Detected | Detected    | Detected    | Detected    |
| 1365 | A_32_P197621  | LOC492303    | Hs.550796 | FAM51A1 pseudogene                                                             | Homo sapiens FAM51A1 pseudogene (LOC492303), non-coding RNA [NR_002830]                                                                                               | 3.97411 | up | 2.31137  | up | 34.31964    | 8.94204    | 6.36858     | 2.42962    | Detected | Compromised | Compromised | Compromised |
| 1366 | A_24_P148026  | LOC100294391 | Hs.638348 | hypothetical protein LOC100294391                                              | PREDICTED: Homo sapiens hypothetical protein LOC100294391 (LOC100294391), mRNA [XM_002346360]                                                                         | 3.97402 | up | 3.31534  | up | 131.99005   | 34.39092   | 123.85309   | 32.94152   | Detected | Detected    | Detected    | Detected    |
| 1367 | A_23_P259741  | SATB1        | Hs.517717 | SATB homeobox 1                                                                | Homo sapiens SATB homeobox 1 (SATB1), transcript variant 1, mRNA [NM_002971]                                                                                          | 3.97349 | up | 3.73541  | up | 1120.19470  | 291.91364  | 592.48596   | 139.86392  | Detected | Detected    | Detected    | Detected    |
| 1368 | A_33_P3732688 | LOC646034    | Hs.512237 | hypothetical LOC646034                                                         | PREDICTED: Homo sapiens hypothetical LOC646034 (LOC646034), mRNA [XM_001724735]                                                                                       | 3.97306 | up | 2.04548  | up | 16.21443    | 4.22581    | 21.89357    | 9.43815    | Detected | Compromised | Detected    | Compromised |
| 1369 | A_24_P945283  | DLG3         | Hs.649747 | discs, large homolog 3 (Drosophila)                                            | Homo sapiens discs, large homolog 3 (Drosophila) (DLG3), transcript variant 1, mRNA [NM_021120]                                                                       | 3.97100 | up | 3.62094  | up | 2060.24240  | 537.21936  | 1754.79200  | 427.33580  | Detected | Detected    | Detected    | Detected    |
| 1370 | A_32_P180315  | KIAA1529     | Hs.435629 | KIAA1529                                                                       | Homo sapiens KIAA1529 (KIAA1529), mRNA [NM_020893]                                                                                                                    | 3.96854 | up | 4.35828  | up | 131.57239   | 34.32949   | 131.35678   | 26.57680   | Detected | Detected    | Detected    | Detected    |
| 1371 | A_23_P42397   | PRSS35       | Hs.98381  | protease, serine, 35                                                           | Homo sapiens protease, serine, 35 (PRSS35), mRNA [NM_153362]                                                                                                          | 3.96791 | up | 1.82946  | up | 27.41526    | 7.15424    | 26.93970    | 12.98481   | Detected | Compromised | Detected    | Compromised |
| 1372 | A_32_P224522  | SLC25A23     | Hs.356231 | solute carrier family 25 (mitochondrial carrier; phosphate carrier), member 23 | Homo sapiens solute carrier family 25 (mitochondrial carrier; phosphate carrier), member 23 (SLC25A23), nuclear gene encoding mitochondrial protein, mRNA [NM_024103] | 3.96470 | up | 4.46638  | up | 1127.95140  | 294.58700  | 944.26320   | 186.42442  | Detected | Detected    | Detected    | Detected    |
| 1373 | A_23_P324754  | KIAA1199     | Hs.459088 | KIAA1199                                                                       | Homo sapiens KIAA1199 (KIAA1199), mRNA [NM_018689]                                                                                                                    | 3.96435 | up | 3.79877  | up | 28472.25000 | 7436.74950 | 16810.92200 | 3902.24340 | Detected | Detected    | Detected    | Detected    |
| 1374 | A_33_P3226542 | SNORD3B-1    | Hs.658815 | small nucleolar RNA, C/D box 3B-1                                              | Homo sapiens small nucleolar RNA, C/D box 3B-1 (SNORD3B-1), small nucleolar RNA [NR_003271]                                                                           | 3.96417 | up | 3.48037  | up | 7005.36870  | 1829.83480 | 5235.63250  | 1326.55810 | Detected | Detected    | Detected    | Detected    |
| 1375 | A_23_P38206   | LSMD1        | Hs.565094 | LSM domain containing 1                                                        | Homo sapiens LSM domain containing 1 (LSMD1), mRNA [NM_032356]                                                                                                        | 3.96331 | up | 2.94147  | up | 126.21130   | 32.97415   | 100.40221   | 30.09846   | Detected | Detected    | Detected    | Detected    |
| 1376 | A_23_P256581  | PRDM13       | Hs.287386 | PR domain containing 13                                                        | Homo sapiens PR domain containing 13 (PRDM13), mRNA [NM_021620]                                                                                                       | 3.96278 | up | 1.16065  | up | 15.65043    | 4.08940    | 4.55909     | 3.46371    | Detected | Compromised | Compromised | Compromised |
| 1377 | A_33_P3376321 | ANK1         | Hs.654438 | ankyrin 1, erythrocytic                                                        | Homo sapiens ankyrin 1, erythrocytic (ANK1), transcript variant 2, mRNA [NM_020477]                                                                                   | 3.96163 | up | 5.24256  | up | 40.78545    | 10.66018   | 34.80586    | 5.85430    | Detected | Compromised | Detected    | Compromised |
| 1378 | A_23_P383986  | CHST15       | Hs.287537 | carbohydrate (N-acetyl)galactosamine 4-sulfate 6-O-sulfotransferase 15         | Homo sapiens carbohydrate (N-acetyl)galactosamine 4-sulfate 6-O-sulfotransferase 15 (CHST15), mRNA [NM_015892]                                                        | 3.96153 | up | 3.99081  | up | 1147.63930  | 299.96872  | 823.15674   | 181.88097  | Detected | Detected    | Detected    | Detected    |
| 1379 | A_24_P140405  | ADAMTS3      | Hs.590919 | ADAM metalloproteinase with thrombospondin type 1 motif, 3                     | Homo sapiens ADAM metalloproteinase with thrombospondin type 1 motif, 3 (ADAMTS3), mRNA [NM_014243]                                                                   | 3.95738 | up | 4.32049  | up | 123.25340   | 32.24962   | 92.68060    | 18.91567   | Detected | Detected    | Detected    | Detected    |
| 1380 | A_23_P90542   | ZNF540       | Hs.121283 | zinc finger protein 540                                                        | Homo sapiens zinc finger protein 540 (ZNF540), mRNA [NM_152606]                                                                                                       | 3.95715 | up | 8.37599  | up | 50.76350    | 13.28317   | 29.92186    | 3.15006    | Detected | Compromised | Detected    | Compromised |
| 1381 | A_23_P105251  | GLI1         | Hs.632702 | GLI family zinc finger 1                                                       | Homo sapiens GLI family zinc finger 1 (GLI1), transcript variant 1, mRNA [NM_005269]                                                                                  | 3.95705 | up | 3.76429  | up | 534.24560   | 139.79857  | 246.28310   | 57.69225   | Detected | Detected    | Detected    | Detected    |
| 1382 | A_23_P86283   | LAPTM5       | Hs.371021 | lysosomal protein transmembrane 5                                              | Homo sapiens lysosomal protein transmembrane 5 (LAPTM5), mRNA [NM_006762]                                                                                             | 3.95479 | up | 2.15939  | up | 66.41994    | 17.39035   | 59.10638    | 24.13623   | Detected | Compromised | Detected    | Detected    |
| 1383 | A_33_P3242483 | ARHGAP5      | Hs.592313 | Rho GTPase activating protein 5                                                | Homo sapiens Rho GTPase activating protein 5 (ARHGAP5), transcript variant 1, mRNA [NM_001030055]                                                                     | 3.95420 | up | 3.63082  | up | 2297.71660  | 601.68810  | 1830.94800  | 444.66840  | Detected | Detected    | Detected    | Detected    |
| 1384 | A_23_P74870   | C1orf129     | Hs.591489 | chromosome 1 open reading frame 129                                            | Homo sapiens chromosome 1 open reading frame 129 (C1orf129), transcript variant 2, mRNA [NM_025063]                                                                   | 3.95415 | up | 3.65744  | up | 69.03223    | 18.07723   | 35.39471    | 8.53349    | Detected | Detected    | Detected    | Compromised |
| 1385 | A_24_P6825    | ZOCHC18      | Hs.648338 | zinc finger, CCHC domain containing 18                                         | Homo sapiens zinc finger, CCHC domain containing 18 (ZOCHC18), transcript variant 1, mRNA [NM_001143978]                                                              | 3.95337 | up | 1.67722  | up | 14.43170    | 3.77993    | 6.43068     | 3.38089    | Detected | Compromised | Compromised | Compromised |
| 1386 | A_24_P118196  | GLT8D4       | Hs.710275 | glycosyltransferase 8 domain containing 4                                      | Homo sapiens glycosyltransferase 8 domain containing 4 (GLT8D4), mRNA [NM_001080393]                                                                                  | 3.95301 | up | 4.15405  | up | 725.89080   | 190.14111  | 611.78613   | 129.86551  | Detected | Detected    | Detected    | Detected    |
| 1387 | A_32_P86245   | EFHC1        | Hs.403171 | EF-hand domain (C-terminal) containing 1                                       | Homo sapiens EF-hand domain (C-terminal) containing 1 (EFHC1), mRNA [NM_018100]                                                                                       | 3.95060 | up | 3.51717  | up | 25.92156    | 6.79409    | 25.66364    | 6.43415    | Detected | Compromised | Detected    | Compromised |
| 1388 | A_32_P48466   | LCA5L        | Hs.517284 | Leber congenital amaurosis 5-like                                              | Homo sapiens Leber congenital amaurosis 5-like (LCA5L), mRNA [NM_152505]                                                                                              | 3.94677 | up | 4.14512  | up | 97.81629    | 25.66273   | 83.47168    | 17.75692   | Detected | Detected    | Detected    | Compromised |
| 1389 | A_23_P102364  | NGEF         | Hs.97316  | neuronal guanine nucleotide exchange factor                                    | Homo sapiens neuronal guanine nucleotide exchange factor (NGEF), transcript variant 1, mRNA [NM_019850]                                                               | 3.94372 | up | 3.89704  | up | 1081.15360  | 283.86688  | 750.09326   | 169.72530  | Detected | Detected    | Detected    | Detected    |

|      |               |              |           |                                                                                   |                                                                                                                          |         |    |          |    |            |            |            |           |          |             |             |             |
|------|---------------|--------------|-----------|-----------------------------------------------------------------------------------|--------------------------------------------------------------------------------------------------------------------------|---------|----|----------|----|------------|------------|------------|-----------|----------|-------------|-------------|-------------|
| 1390 | A_24_P822704  | TMEM198      | Hs.446664 | transmembrane protein 198                                                         | Homo sapiens transmembrane protein 198 (TMEM198), mRNA [NM_001005209]                                                    | 3.94368 | up | 3.50985  | up | 457.51315  | 120.12550  | 441.14774  | 110.83108 | Detected | Detected    | Detected    | Detected    |
| 1391 | A_33_P3396404 | CLLUIOS      | Hs.551199 | chronic lymphocytic leukemia up-regulated 1 opposite strand                       | Homo sapiens chronic lymphocytic leukemia up-regulated 1 opposite strand (CLLUIOS), mRNA [NM_001029232]                  | 3.94298 | up | 2.87000  | up | 61.93248   | 16.26399   | 47.94620   | 14.73121  | Detected | Detected    | Detected    | Detected    |
| 1392 | A_24_P40551   | BEX4         | Hs.184736 | brain expressed, X-linked 4                                                       | Homo sapiens brain expressed, X-linked 4 (BEX4), mRNA [NM_001127688]                                                     | 3.94295 | up | 3.62412  | up | 2022.77820 | 531.20306  | 1583.26700 | 385.22784 | Detected | Detected    | Detected    | Detected    |
| 1393 | A_23_P91636   | POM121L9P    | Hs.318898 | POM121 membrane glycoprotein-like 9 (rat) pseudogene                              | Homo sapiens POM121 membrane glycoprotein-like 9 (rat) pseudogene (POM121L9P), non-coding RNA [NR_003714]                | 3.94133 | up | 3.96913  | up | 257.61490  | 67.68008   | 229.35724  | 50.95446  | Detected | Detected    | Detected    | Detected    |
| 1394 | A_23_P204246  | PHC1         | Hs.305985 | polyhomeotic homolog 1 (Drosophila)                                               | Homo sapiens polyhomeotic homolog 1 (Drosophila) (PHC1), mRNA [NM_004426]                                                | 3.93980 | up | 3.33722  | up | 101.40911  | 26.65234   | 71.05072   | 18.77369  | Detected | Detected    | Detected    | Detected    |
| 1395 | A_23_P333022  | PXT1         | Hs.520097 | peroxisomal, testis specific 1                                                    | Homo sapiens peroxisomal, testis specific 1 (PXT1), mRNA [NM_152990]                                                     | 3.93623 | up | 1.60664  | up | 12.42804   | 3.26930    | 9.68831    | 5.31736   | Detected | Compromised | Compromised | Compromised |
| 1396 | A_33_P3231727 | LOC100134240 | Hs.98178  | similar to LOC339742 protein                                                      | PREDICTED: Homo sapiens hypothetical LOC100134240 (LOC100134240), mRNA [XM_001718062]                                    | 3.93564 | up | 10.13036 | up | 65.25548   | 17.16860   | 36.36771   | 3.16561   | Detected | Compromised | Detected    | Compromised |
| 1397 | A_33_P3390939 | LOC100129950 |           | similar to UCA1 protein                                                           | PREDICTED: Homo sapiens similar to UCA1 protein (LOC100129950), mRNA [XM_001718934]                                      | 3.93409 | up | 2.50587  | up | 13.08650   | 3.44439    | 7.76351    | 2.73191   | Detected | Compromised | Compromised | Compromised |
| 1398 | A_33_P3601202 | IFNAP22      | Hs.545842 | interferon, alpha pseudogene 22                                                   | Messenger RNA for human leukocyte (alpha) interferon [V00539]                                                            | 3.93058 | up | 4.53525  | up | 60.90162   | 16.04371   | 49.27830   | 9.58121   | Detected | Detected    | Detected    | Compromised |
| 1399 | A_33_P3315554 | ANKMY1       | Hs.656615 | ankyrin repeat and MYND domain containing 1                                       | Homo sapiens ankyrin repeat and MYND domain containing 1 (ANKMY1), transcript variant 1, mRNA [NM_016552]                | 3.92714 | up | 3.75475  | up | 498.42090  | 131.41740  | 478.09375  | 112.27869 | Detected | Detected    | Detected    | Detected    |
| 1400 | A_33_P3245415 | N4BP2L1      | Hs.161220 | NEDD4 binding protein 2-like 1                                                    | Homo sapiens NEDD4 binding protein 2-like 1 (N4BP2L1), transcript variant 1, mRNA [NM_052818]                            | 3.92706 | up | 5.69033  | up | 148.82596  | 39.18866   | 158.29610  | 24.53004  | Detected | Detected    | Detected    | Detected    |
| 1401 | A_23_P99405   | ZMYM2        | Hs.644041 | zinc finger, MYM-type 2                                                           | Homo sapiens zinc finger, MYM-type 2 (ZMYM2), mRNA [NM_003453]                                                           | 3.92627 | up | 4.26607  | up | 3270.34300 | 862.47534  | 1891.97250 | 391.06775 | Detected | Detected    | Detected    | Detected    |
| 1402 | A_32_P178499  | C16orf86     | Hs.632208 | chromosome 16 open reading frame 86                                               | Homo sapiens chromosome 16 open reading frame 86 (C16orf86), mRNA [NM_001012984]                                         | 3.92509 | up | 3.74171  | up | 667.11255  | 175.98761  | 835.20966  | 196.82967 | Detected | Detected    | Detected    | Detected    |
| 1403 | A_23_P392126  | C17orf108    | Hs.434386 | chromosome 17 open reading frame 108                                              | Homo sapiens chromosome 17 open reading frame 108 (C17orf108), mRNA [NM_001076690]                                       | 3.92488 | up | 3.47278  | up | 5686.34770 | 1500.16870 | 3847.45040 | 976.92505 | Detected | Detected    | Detected    | Detected    |
| 1404 | A_24_P419177  | ZNF638       | Hs.434401 | zinc finger protein 638                                                           | Homo sapiens zinc finger protein 638 (ZNF638), transcript variant 1, mRNA [NM_014497]                                    | 3.92189 | up | 4.12572  | up | 478.07290  | 126.22093  | 231.67874  | 49.51670  | Detected | Detected    | Detected    | Detected    |
| 1405 | A_33_P3269218 | BAI2         | Hs.524138 | brain-specific angiogenesis inhibitor 2                                           | Homo sapiens brain-specific angiogenesis inhibitor 2 (BAI2), mRNA [NM_001703]                                            | 3.91935 | up | 4.24733  | up | 2341.00780 | 618.47424  | 2213.78150 | 459.60500 | Detected | Detected    | Detected    | Detected    |
| 1406 | A_23_P86195   | SLC44A3      | Hs.483423 | solute carrier family 44, member 3                                                | Homo sapiens solute carrier family 44, member 3 (SLC44A3), transcript variant 2, mRNA [NM_152369]                        | 3.91420 | up | 2.67141  | up | 71.93552   | 19.02978   | 62.75941   | 20.71590  | Detected | Detected    | Detected    | Detected    |
| 1407 | A_33_P3395688 | GCOM1        | Hs.437256 | GRINL1A complex locus                                                             | Homo sapiens GRINL1A complex locus (GCOM1), transcript variant 12, mRNA [NM_001018100]                                   | 3.91412 | up | 3.18867  | up | 29.32269   | 7.75716    | 24.79713   | 6.85737   | Detected | Compromised | Detected    | Compromised |
| 1408 | A_23_P358542  | KIFC2        | Hs.528713 | kinesin family member C2                                                          | Homo sapiens kinesin family member C2 (KIFC2), mRNA [NM_145754]                                                          | 3.90962 | up | 3.58986  | up | 556.58040  | 147.40990  | 577.44290  | 141.83932 | Detected | Detected    | Detected    | Detected    |
| 1409 | A_33_P3336282 | TAF4B        | Hs.369519 | TAF4b RNA polymerase II, TATA box binding protein (TBP)-associated factor, 105kDa | Homo sapiens TAF4b RNA polymerase II, TATA box binding protein (TBP)-associated factor, 105kDa (TAF4B), mRNA [NM_005640] | 3.90695 | up | 1.94559  | up | 19.03182   | 5.04400    | 12.72849   | 5.76888   | Detected | Compromised | Compromised | Compromised |
| 1410 | A_33_P3264163 | DDR1         | Hs.631988 | discoidin domain receptor tyrosine kinase 1                                       | Homo sapiens discoidin domain receptor tyrosine kinase 1 (DDR1), transcript variant 2, mRNA [NM_001954]                  | 3.90601 | up | 1.68943  | up | 15.23726   | 4.03931    | 14.01807   | 7.31668   | Detected | Compromised | Compromised | Compromised |
| 1411 | A_33_P3221414 | NTNG1        |           | netrin G1                                                                         | Netrin-G1 Precursor (Laminet-1) [Source:UniProtKB/Swiss-Prot;Acc:Q9Y2I2] [ENST00000370066]                               | 3.90567 | up | 2.83556  | up | 71.04034   | 18.83402   | 53.79359   | 16.72850  | Detected | Detected    | Detected    | Detected    |
| 1412 | A_24_P944049  | CEP68        | Hs.709257 | centrosomal protein 68kDa                                                         | Homo sapiens centrosomal protein 68kDa (CEP68), mRNA [NM_015147]                                                         | 3.90061 | up | 3.04144  | up | 226.58691  | 60.14996   | 149.94128  | 43.47173  | Detected | Detected    | Detected    | Detected    |
| 1413 | A_32_P337442  | C10orf67     | Hs.522360 | chromosome 10 open reading frame 67                                               | Homo sapiens chromosome 10 open reading frame 67 (C10orf67), mRNA [NM_153714]                                            | 3.89984 | up | 2.54999  | up | 12.49425   | 3.31739    | 8.10686    | 2.80337   | Detected | Compromised | Compromised | Compromised |
| 1414 | A_23_P254442  | ZNF783       |           | zinc finger family member 783                                                     | Homo sapiens zinc finger family member 783 (ZNF783), non-coding RNA [NR_015357]                                          | 3.89560 | up | 3.85740  | up | 924.48290  | 245.72963  | 715.10950  | 163.47182 | Detected | Detected    | Detected    | Detected    |
| 1415 | A_23_P404821  | KIAA1147     | Hs.521240 | KIAA1147                                                                          | Homo sapiens KIAA1147 (KIAA1147), mRNA [NM_001080392]                                                                    | 3.89476 | up | 3.73509  | up | 315.45940  | 83.86786   | 232.79349  | 54.95851  | Detected | Detected    | Detected    | Detected    |
| 1416 | A_23_P39910   | C2orf64      | Hs.596537 | chromosome 2 open reading frame 64                                                | Homo sapiens chromosome 2 open reading frame 64 (C2orf64), mRNA [NM_001008215]                                           | 3.89305 | up | 4.19437  | up | 2596.91940 | 690.71954  | 2323.07030 | 488.38410 | Detected | Detected    | Detected    | Detected    |
| 1417 | A_23_P98645   | DCHS1        | Hs.199850 | dachsous 1 (Drosophila)                                                           | Homo sapiens dachsous 1 (Drosophila) (DCHS1), mRNA [NM_003737]                                                           | 3.89171 | up | 3.88217  | up | 569.51090  | 151.52866  | 538.25726  | 122.25888 | Detected | Detected    | Detected    | Detected    |
| 1418 | A_33_P3245631 | TTC39A       | Hs.112949 | tetratricopeptide repeat domain 39A                                               | Homo sapiens tetratricopeptide repeat domain 39A (TTC39A), transcript variant 2, mRNA [NM_001080484]                     | 3.88785 | up | 1.62452  | up | 14.85822   | 3.95722    | 19.78834   | 10.74111  | Detected | Compromised | Detected    | Compromised |
| 1419 | A_24_P918907  | LOC154761    |           | hypothetical LOC154761                                                            | Homo sapiens hypothetical LOC154761 (LOC154761), non-coding RNA [NR_015421]                                              | 3.88440 | up | 4.06668  | up | 78.62959   | 20.96021   | 48.99228   | 10.62314  | Detected | Detected    | Detected    | Compromised |
| 1420 | A_24_P396650  | RPS6KA1      | Hs.149957 | ribosomal protein S6 kinase, 90kDa, polypeptide 1                                 | Homo sapiens ribosomal protein S6 kinase, 90kDa, polypeptide 1 (RPS6KA1), transcript variant 1, mRNA [NM_002953]         | 3.88361 | up | 3.92335  | up | 669.94570  | 178.62280  | 574.82227  | 129.19400 | Detected | Detected    | Detected    | Detected    |

|      |               |              |           |                                                                         |                                                                                                                        |         |    |         |    |             |            |             |            |              |             |             |             |
|------|---------------|--------------|-----------|-------------------------------------------------------------------------|------------------------------------------------------------------------------------------------------------------------|---------|----|---------|----|-------------|------------|-------------|------------|--------------|-------------|-------------|-------------|
| 1421 | A_33_P3262685 | POM121L1P    | Hs.318898 | POM121 membrane glycoprotein-like 1 (rat) pseudogene                    | Homo sapiens POM121 membrane glycoprotein-like 1 (rat) pseudogene (POM121L1P), non-coding RNA [NR_024591]              | 3.88246 | up | 3.31579 | up | 93.91161    | 25.04640   | 92.79379    | 24.67730   | Detected     | Detected    | Detected    | Detected    |
| 1422 | A_23_P332326  | ARHGEF19     | Hs.591532 | Rho guanine nucleotide exchange factor (GEF) 19                         | Homo sapiens Rho guanine nucleotide exchange factor (GEF) 19 (ARHGEF19), mRNA [NM_153213]                              | 3.87855 | up | 3.80429 | up | 3027.87480  | 808.35330  | 3155.46970  | 731.40140  | Detected     | Detected    | Detected    | Detected    |
| 1423 | A_33_P3311165 |              | Hs.451549 |                                                                         | cDNA FLJ44313 fis. clone TRACH202591.FLJ44313 protein : [Source:UniProtKB/TrEMBL;Acc:Q6ZTR6] [ENST00000405150]         | 3.87412 | up | 4.84442 | up | 123.72891   | 33.06974   | 66.33850    | 12.07507   | Detected     | Detected    | Detected    | Compromised |
| 1424 | A_23_P348063  | SYNGR1       | Hs.216226 | synaptogyrin 1                                                          | Homo sapiens synaptogyrin 1 (SYNGR1), transcript variant 1a, mRNA [NM_004711]                                          | 3.87357 | up | 4.08558 | up | 283.81640   | 75.86820   | 312.69934   | 67.48994   | Detected     | Detected    | Detected    | Detected    |
| 1425 | A_23_P39024   | MORG1        | Hs.657204 | mitogen-activated protein kinase organizer 1                            | Homo sapiens mitogen-activated protein kinase organizer 1 (MORG1), transcript variant 2, mRNA [NM_032332]              | 3.87285 | up | 1.27212 | up | 2078.98220  | 555.84393  | 1022.96960  | 709.08670  | Not Detected | Detected    | Detected    | Detected    |
| 1426 | A_33_P3293913 | BICC1        | Hs.158745 | bicaudal C homolog 1 (Drosophila)                                       | Homo sapiens bicaudal C homolog 1 (Drosophila) (BICC1), mRNA [NM_001080512]                                            | 3.86809 | up | 4.11923 | up | 75.19399    | 20.12886   | 15.77041    | 3.37592    | Detected     | Detected    | Detected    | Compromised |
| 1427 | A_23_P67299   | DOCK6        | Hs.591002 | dedicator of cytokinesis 6                                              | Homo sapiens dedicator of cytokinesis 6 (DOCK6), mRNA [NM_020812]                                                      | 3.86124 | up | 3.47972 | up | 1748.44000  | 468.87552  | 1698.29540  | 430.36313  | Detected     | Detected    | Detected    | Detected    |
| 1428 | A_23_P210330  | HSPC159      | Hs.372208 | galectin-related protein                                                | Homo sapiens galectin-related protein (HSPC159), mRNA [NM_014181]                                                      | 3.85685 | up | 3.94276 | up | 647.40800   | 173.81142  | 568.76790   | 127.20379  | Detected     | Detected    | Detected    | Detected    |
| 1429 | A_23_P114670  | ARHGEF16     | Hs.87435  | Rho guanine exchange factor (GEF) 16                                    | Homo sapiens Rho guanine exchange factor (GEF) 16 (ARHGEF16), mRNA [NM_014448]                                         | 3.85308 | up | 3.71087 | up | 103.10102   | 27.70688   | 115.26511   | 27.38974   | Detected     | Detected    | Detected    | Detected    |
| 1430 | A_23_P60180   | ABL1         | Hs.431048 | c-abl oncogene 1, receptor tyrosine kinase                              | Homo sapiens c-abl oncogene 1, receptor tyrosine kinase (ABL1), transcript variant a, mRNA [NM_005157]                 | 3.85129 | up | 3.37780 | up | 17743.97700 | 4770.65530 | 14995.34100 | 3914.60080 | Detected     | Detected    | Detected    | Detected    |
| 1431 | A_33_P3254216 | MAPK10       | Hs.125503 | mitogen-activated protein kinase 10                                     | Homo sapiens mitogen-activated protein kinase 10 (MAPK10), transcript variant 3, mRNA [NM_138980]                      | 3.84996 | up | 4.09597 | up | 13.96894    | 3.75699    | 14.78389    | 3.18272    | Detected     | Compromised | Compromised | Compromised |
| 1432 | A_33_P3422439 | LOC100129555 | Hs.533086 | similar to High-mobility group nucleosome binding domain 1              | PREDICTED: Homo sapiens similar to high-mobility group nucleosome binding domain 1 (LOC100129555), miscRNA [XR_038415] | 3.84283 | up | 1.77416 | up | 24.31159    | 6.55082    | 12.93433    | 6.42859    | Detected     | Compromised | Detected    | Compromised |
| 1433 | A_33_P3268726 |              |           |                                                                         |                                                                                                                        | 3.84096 | up | 3.16871 | up | 15.40797    | 4.15374    | 18.31080    | 5.09554    | Detected     | Compromised | Detected    | Compromised |
| 1434 | A_23_P40096   | PROC         | Hs.224698 | protein C (inactivator of coagulation factors Va and VIIIa)             | Homo sapiens protein C (inactivator of coagulation factors Va and VIIIa) (PROC), mRNA [NM_008312]                      | 3.84053 | up | 1.22244 | up | 13.99061    | 3.77206    | 6.58614     | 4.75081    | Detected     | Compromised | Compromised | Compromised |
| 1435 | A_32_P172848  | GK           | Hs.1466   | glycerol kinase                                                         | Homo sapiens glycerol kinase (GK), transcript variant 2, mRNA [NM_000167]                                              | 3.83873 | up | 5.90882 | up | 331.90317   | 89.52751   | 323.37872   | 48.25875   | Detected     | Detected    | Detected    | Detected    |
| 1436 | A_33_P3221418 | NTNG1        | Hs.657434 | netrin G1                                                               | Homo sapiens netrin G1 (NTNG1), transcript variant 2, mRNA [NM_00113228]                                               | 3.83787 | up | 2.17658 | up | 12.31479    | 3.32254    | 16.20202    | 6.56387    | Compromised  | Compromised | Detected    | Compromised |
| 1437 | A_23_P367586  | DNHD1        | Hs.720080 | dynein heavy chain domain 1                                             | Homo sapiens dynein heavy chain domain 1 (DNHD1), transcript variant 2, mRNA [NM_173589]                               | 3.83736 | up | 4.07426 | up | 12.33440    | 3.32827    | 15.08395    | 3.26462    | Compromised  | Compromised | Detected    | Compromised |
| 1438 | A_23_P322854  | LOC100288439 | Hs.616684 | hypothetical protein LOC100288439                                       | Putative uncharacterized protein [Source:UniProtKB/TrEMBL;Acc:Q96FL4] [ENST00000328202]                                | 3.83602 | up | 2.90665 | up | 124.54832   | 33.61945   | 145.91930   | 44.26753   | Detected     | Detected    | Detected    | Detected    |
| 1439 | A_24_P37540   | TTL3         | Hs.709359 | tubulin tyrosine ligase-like family, member 3                           | Homo sapiens tubulin tyrosine ligase-like family, member 3 (TTL3), mRNA [NM_001025930]                                 | 3.83219 | up | 3.62226 | up | 720.61456   | 194.71031  | 944.70080   | 229.97460  | Detected     | Detected    | Detected    | Detected    |
| 1440 | A_33_P3242878 | EFCAB6       | Hs.658996 | EF-hand calcium binding domain 6                                        | Homo sapiens EF-hand calcium binding domain 6 (EFCAB6), transcript variant 1, mRNA [NM_022785]                         | 3.82929 | up | 7.67010 | up | 29.95172    | 8.09910    | 26.79373    | 3.08033    | Detected     | Compromised | Detected    | Compromised |
| 1441 | A_24_P333567  | hCG_2022304  | Hs.593896 | similar to hCG2022304                                                   | Homo sapiens similar to hCG2022304 (LOC100289341), non-coding RNA [NR_027447]                                          | 3.82644 | up | 3.63314 | up | 975.81305   | 264.06116  | 689.26090   | 167.28897  | Detected     | Detected    | Detected    | Detected    |
| 1442 | A_33_P3389291 | TEX9         | Hs.511476 | testis expressed 9                                                      | Homo sapiens testis expressed 9 (TEX9), mRNA [NM_198524]                                                               | 3.82288 | up | 1.72788 | up | 13.78618    | 3.73410    | 6.28083     | 3.20531    | Detected     | Compromised | Compromised | Compromised |
| 1443 | A_33_P3345586 | HCN2         | Hs.124161 | hyperpolarization activated cyclic nucleotide-gated potassium channel 2 | Homo sapiens hyperpolarization activated cyclic nucleotide-gated potassium channel 2 (HCN2), mRNA [NM_001194]          | 3.82234 | up | 2.27881 | up | 30.22003    | 8.18651    | 19.88368    | 7.70081    | Detected     | Compromised | Detected    | Compromised |
| 1444 | A_23_P202810  | OVOL1        | Hs.134434 | ovo-like 1 (Drosophila)                                                 | Homo sapiens ovo-like 1 (Drosophila) (OVOL1), mRNA [NM_004561]                                                         | 3.82144 | up | 5.02161 | up | 12.07757    | 3.27255    | 15.60781    | 2.74072    | Compromised  | Compromised | Detected    | Compromised |
| 1445 | A_23_P92672   | OCLN         | Hs.592605 | occludin                                                                | Homo sapiens occludin (OCLN), mRNA [NM_002538]                                                                         | 3.82014 | up | 2.40648 | up | 16.91504    | 4.58487    | 9.13593     | 3.34762    | Detected     | Compromised | Compromised | Compromised |
| 1446 | A_33_P3576797 | LOC158863    | Hs.138411 | hypothetical protein LOC158863                                          | Homo sapiens mRNA; cDNA DKFP586J1922 (from clone DKFP586J1922) [AL110203]                                              | 3.82007 | up | 2.25387 | up | 26.75259    | 7.25151    | 27.86678    | 10.90243   | Detected     | Compromised | Detected    | Compromised |
| 1447 | A_23_P58266   | S100P        | Hs.2962   | S100 calcium binding protein P                                          | Homo sapiens S100 calcium binding protein P (S100P), mRNA [NM_005980]                                                  | 3.81446 | up | 4.20956 | up | 1624.49260  | 440.97894  | 1623.27730  | 340.03360  | Detected     | Detected    | Detected    | Detected    |
| 1448 | A_23_P142447  | MYO1F        | Hs.465818 | myosin IF                                                               | Homo sapiens myosin IF (MYO1F), mRNA [NM_012335]                                                                       | 3.81399 | up | 3.34297 | up | 600.53060   | 163.03789  | 621.51935   | 163.94110  | Detected     | Detected    | Detected    | Detected    |
| 1449 | A_23_P4082    | CCT6B        | Hs.73072  | chaperonin containing TCP1, subunit 6B (zeta 2)                         | Homo sapiens chaperonin containing TCP1, subunit 6B (zeta 2) (CCT6B), mRNA [NM_006584]                                 | 3.81367 | up | 3.81569 | up | 1664.71810  | 451.99194  | 1194.77540  | 276.10800  | Detected     | Detected    | Detected    | Detected    |
| 1450 | A_23_P124044  | DEAF1        | Hs.243994 | deformed epidermal autoregulatory factor 1 (Drosophila)                 | Homo sapiens deformed epidermal autoregulatory factor 1 (Drosophila) (DEAF1), mRNA [NM_021008]                         | 3.81364 | up | 3.46368 | up | 7695.43500  | 2089.42290 | 5654.64000  | 1439.57040 | Detected     | Detected    | Detected    | Detected    |
| 1451 | A_23_P119143  | ICAM5        | Hs.465862 | intercellular adhesion molecule 5, telencephalin                        | Homo sapiens intercellular adhesion molecule 5, telencephalin (ICAM5), mRNA [NM_003259]                                | 3.81283 | up | 3.50499 | up | 462.23810   | 125.53117  | 346.64862   | 87.21031   | Detected     | Detected    | Detected    | Detected    |



|      |               |           |           |                                                                                                                                             |                                                                                                                                                          |         |    |          |    |             |            |             |            |              |             |              |             |
|------|---------------|-----------|-----------|---------------------------------------------------------------------------------------------------------------------------------------------|----------------------------------------------------------------------------------------------------------------------------------------------------------|---------|----|----------|----|-------------|------------|-------------|------------|--------------|-------------|--------------|-------------|
| 1452 | A_23_P127068  | SEMA4G    | Hs.591923 | sema domain, immunoglobulin domain (Ig), transmembrane domain (TM) and short cytoplasmic domain, (semaphorin) 4G (SEMA4G), mRNA [NM_017893] | Homo sapiens sema domain, immunoglobulin domain (Ig), transmembrane domain (TM) and short cytoplasmic domain, (semaphorin) 4G (SEMA4G), mRNA [NM_017893] | 3.81206 | up | 3.85565  | up | 141.31444   | 38.38482   | 118.24230   | 27.04213   | Detected     | Detected    | Detected     | Detected    |
| 1453 | A_24_P219474  | MGAT5B    | Hs.144531 | mannosyl (alpha-1,6-)-glycoprotein beta-1,6-N-acetylglucosaminyltransferase, isozyme B (MGAT5B), transcript variant 1, mRNA [NM_144677]     | Homo sapiens mannosyl (alpha-1,6-)-glycoprotein beta-1,6-N-acetylglucosaminyltransferase, isozyme B (MGAT5B), transcript variant 1, mRNA [NM_144677]     | 3.81193 | up | 3.21846  | up | 94.82007    | 25.75658   | 50.82652    | 13.92539   | Detected     | Detected    | Detected     | Compromised |
| 1454 | A_33_P3353345 | SULT4A1   | Hs.189810 | sulfotransferase family 4A, member 1 (SULT4A1), mRNA [NM_014351]                                                                            | Homo sapiens sulfotransferase family 4A, member 1 (SULT4A1), mRNA [NM_014351]                                                                            | 3.80869 | up | 3.30144  | up | 174.02548   | 47.31189   | 143.57425   | 38.34769   | Detected     | Detected    | Detected     | Detected    |
| 1455 | A_24_P678418  | FLJ45244  | Hs.189810 | hypothetical locus FLJ45244                                                                                                                 | Homo sapiens hypothetical locus FLJ45244 (FLJ45244), non-coding RNA [NR_015415]                                                                          | 3.80582 | up | 3.72186  | up | 502.15625   | 136.62286  | 423.51877   | 100.34090  | Detected     | Detected    | Detected     | Detected    |
| 1456 | A_33_P3308585 | UNQ2963   | Hs.246046 | hypothetical LOC283314                                                                                                                      | Homo sapiens hypothetical LOC283314 (LOC283314), non-coding RNA [NR_026947]                                                                              | 3.80383 | up | 1.00935  | up | 13.81035    | 3.75938    | 8.53236     | 7.45404    | Detected     | Compromised | Compromised  | Compromised |
| 1457 | A_24_P281988  | PLCL2     | Hs.202010 | phospholipase C-like 2 (PLCL2), transcript variant 2, mRNA [NM_015184]                                                                      | Homo sapiens phospholipase C-like 2 (PLCL2), transcript variant 2, mRNA [NM_015184]                                                                      | 3.80355 | up | 4.04886  | up | 715.88900   | 194.89008  | 537.98160   | 117.16563  | Detected     | Detected    | Detected     | Detected    |
| 1458 | A_23_P78108   | ALDOC     | Hs.155247 | aldolase C, fructose-bisphosphate (ALDOC), mRNA [NM_005165]                                                                                 | Homo sapiens aldolase C, fructose-bisphosphate (ALDOC), mRNA [NM_005165]                                                                                 | 3.80205 | up | 3.56683  | up | 527.72205   | 143.72101  | 798.11110   | 197.30899  | Detected     | Detected    | Detected     | Detected    |
| 1459 | A_33_P3228305 | ARHGAP26  | Hs.654668 | Rho GTPase activating protein 26 (ARHGAP26), transcript variant 1, mRNA [NM_015071]                                                         | Homo sapiens Rho GTPase activating protein 26 (ARHGAP26), transcript variant 1, mRNA [NM_015071]                                                         | 3.80155 | up | 4.21495  | up | 86.02752    | 23.43202   | 69.06851    | 14.44951   | Detected     | Detected    | Detected     | Detected    |
| 1460 | A_33_P3213792 | KCNK4     | Hs.647233 | potassium channel, subfamily K, member 4 (KCNK4), mRNA [NM_033310]                                                                          | Homo sapiens potassium channel, subfamily K, member 4 (KCNK4), mRNA [NM_033310]                                                                          | 3.79975 | up | 3.20581  | up | 114.83621   | 31.29369   | 102.70381   | 28.24970   | Detected     | Detected    | Detected     | Detected    |
| 1461 | A_33_P3401156 | ETV1      | Hs.22634  | ets variant 1 (ETV1), transcript variant 1, mRNA [NM_004956]                                                                                | Homo sapiens ets variant 1 (ETV1), transcript variant 1, mRNA [NM_004956]                                                                                | 3.79950 | up | 3.85688  | up | 874.94086   | 238.44322  | 798.51160   | 182.56226  | Detected     | Detected    | Detected     | Detected    |
| 1462 | A_23_P369899  | TMEM158   | Hs.716411 | transmembrane protein 158 (TMEM158), mRNA [NM_015444]                                                                                       | Homo sapiens transmembrane protein 158 (TMEM158), mRNA [NM_015444]                                                                                       | 3.79885 | up | 4.01390  | up | 20499.51600 | 5587.59000 | 13591.27700 | 2985.78930 | Detected     | Detected    | Detected     | Detected    |
| 1463 | A_24_P892472  | EMX2OS    | Hs.312592 | EMX2 opposite strand (non-protein coding) (EMX2OS), non-coding RNA [NR_002791]                                                              | Homo sapiens EMX2 opposite strand (non-protein coding) (EMX2OS), non-coding RNA [NR_002791]                                                              | 3.79486 | up | 3.79630  | up | 4735.68750  | 1292.17140 | 3871.12230  | 899.16900  | Detected     | Detected    | Detected     | Detected    |
| 1464 | A_33_P3361758 | C15orf33  | Hs.712959 | chromosome 15 open reading frame 33 (C15orf33), mRNA [NM_152647]                                                                            | Homo sapiens chromosome 15 open reading frame 33 (C15orf33), mRNA [NM_152647]                                                                            | 3.79408 | up | 3.51256  | up | 11.72691    | 3.20045    | 12.89860    | 3.23806    | Compromised  | Compromised | Detected     | Compromised |
| 1465 | A_24_P932939  | LOC401052 | Hs.662766 | hypothetical LOC401052                                                                                                                      | Homo sapiens hypothetical LOC401052 (LOC401052), mRNA [NM_001008737]                                                                                     | 3.79278 | up | 1.93672  | up | 22.57457    | 6.16304    | 18.38608    | 8.37119    | Detected     | Compromised | Detected     | Compromised |
| 1466 | A_23_P99226   | SIRT4     | Hs.50861  | sirtuin (silent mating type information regulation 2 homolog) 4 (S. cerevisiae) (SIRT4), mRNA [NM_012240]                                   | Homo sapiens sirtuin (silent mating type information regulation 2 homolog) 4 (S. cerevisiae) (SIRT4), mRNA [NM_012240]                                   | 3.79266 | up | 4.17605  | up | 194.12563   | 52.99957   | 178.01634   | 37.58888   | Detected     | Detected    | Detected     | Detected    |
| 1467 | A_33_P3229402 | PECAM1    | Hs.514412 | platelet/endothelial cell adhesion molecule (PECAM1), mRNA [NM_000442]                                                                      | Homo sapiens platelet/endothelial cell adhesion molecule (PECAM1), mRNA [NM_000442]                                                                      | 3.79197 | up | 10.55478 | up | 42.67268    | 11.65248   | 42.51489    | 3.55187    | Detected     | Compromised | Detected     | Compromised |
| 1468 | A_23_P370454  | KCNAB3    | Hs.435074 | potassium voltage-gated channel, shaker-related subfamily, beta member 3 (KCNAB3), mRNA [NM_004732]                                         | Homo sapiens potassium voltage-gated channel, shaker-related subfamily, beta member 3 (KCNAB3), mRNA [NM_004732]                                         | 3.79073 | up | 3.24222  | up | 125.41696   | 34.25639   | 81.00155    | 22.03007   | Detected     | Detected    | Detected     | Detected    |
| 1469 | A_23_P167509  | CYFIP2    | Hs.519702 | cytoplasmic FMR1 interacting protein 2 (CYFIP2), transcript variant 2, mRNA [NM_001937332]                                                  | Homo sapiens cytoplasmic FMR1 interacting protein 2 (CYFIP2), transcript variant 2, mRNA [NM_001937332]                                                  | 3.79071 | up | 3.03920  | up | 65.15610    | 17.79787   | 60.37597    | 17.51742   | Detected     | Detected    | Detected     | Detected    |
| 1470 | A_23_P106405  | NDN       | Hs.50130  | necdin homolog (mouse) (NDN), mRNA [NM_002487]                                                                                              | Homo sapiens necdin homolog (mouse) (NDN), mRNA [NM_002487]                                                                                              | 3.78980 | up | 3.94751  | up | 4478.53120  | 1223.63540 | 3049.49000  | 681.19244  | Detected     | Detected    | Detected     | Detected    |
| 1471 | A_23_P103617  | ANXA9     | Hs.720072 | annexin A9 (ANXA9), mRNA [NM_003568]                                                                                                        | Homo sapiens annexin A9 (ANXA9), mRNA [NM_003568]                                                                                                        | 3.78940 | up | 6.94954  | up | 17.42940    | 4.76261    | 29.12772    | 3.69587    | Not Detected | Compromised | Not Detected | Compromised |
| 1472 | A_23_P376449  | LOC642413 | Hs.558776 | similar to Putative cathepsin L-like protein 6 (LOC642413), miscRNA [XR_016155]                                                             | PREDICTED: Homo sapiens similar to Putative cathepsin L-like protein 6 (LOC642413), miscRNA [XR_016155]                                                  | 3.78738 | up | 3.93248  | up | 18216.83400 | 4980.42770 | 19787.43400 | 4436.98830 | Detected     | Detected    | Detected     | Detected    |
| 1473 | A_23_P423427  | FAM171B   | Hs.28872  | family with sequence similarity 171, member B (FAM171B), mRNA [NM_177454]                                                                   | Homo sapiens family with sequence similarity 171, member B (FAM171B), mRNA [NM_177454]                                                                   | 3.78712 | up | 3.90628  | up | 31.23506    | 8.54017    | 28.24580    | 6.37612    | Detected     | Compromised | Detected     | Compromised |
| 1474 | A_24_P179816  | SLC27A3   | Hs.438723 | solute carrier family 27 (fatty acid transporter), member 3 (SLC27A3), mRNA [NM_024330]                                                     | Homo sapiens solute carrier family 27 (fatty acid transporter), member 3 (SLC27A3), mRNA [NM_024330]                                                     | 3.78702 | up | 3.17150  | up | 1644.66550  | 449.69003  | 1772.72350  | 492.88116  | Detected     | Detected    | Detected     | Detected    |
| 1475 | A_23_P347468  | FZD3      | Hs.40735  | frizzled homolog 3 (Drosophila) (FZD3), mRNA [NM_017412]                                                                                    | Homo sapiens frizzled homolog 3 (Drosophila) (FZD3), mRNA [NM_017412]                                                                                    | 3.78656 | up | 3.48770  | up | 139.20070   | 38.06531   | 67.09385    | 16.96326   | Detected     | Detected    | Detected     | Detected    |
| 1476 | A_33_P3424067 | SUV420H1  | Hs.632120 | suppressor of variegation 4-20 homolog 1 (Drosophila) (SUV420H1), transcript variant 1, mRNA [NM_017635]                                    | Homo sapiens suppressor of variegation 4-20 homolog 1 (Drosophila) (SUV420H1), transcript variant 1, mRNA [NM_017635]                                    | 3.78501 | up | 5.44438  | up | 92.04596    | 25.18086   | 47.91030    | 7.75972    | Detected     | Detected    | Detected     | Compromised |
| 1477 | A_23_P362148  | DNER      | Hs.234074 | delta/notch-like EGF repeat containing (DNER), mRNA [NM_139072]                                                                             | Homo sapiens delta/notch-like EGF repeat containing (DNER), mRNA [NM_139072]                                                                             | 3.78299 | up | 3.67949  | up | 607.48260   | 166.27700  | 420.82130   | 100.84981  | Detected     | Detected    | Detected     | Detected    |
| 1478 | A_33_P3419460 | VAPA      | Hs.699980 | VAMP (vesicle-associated membrane protein)-associated protein A, 33kDa (VAPA), transcript variant 1, mRNA [NM_003574]                       | Homo sapiens VAMP (vesicle-associated membrane protein)-associated protein A, 33kDa (VAPA), transcript variant 1, mRNA [NM_003574]                       | 3.78281 | up | 3.88242  | up | 460.91266   | 126.16458  | 320.39642   | 72.76965   | Detected     | Detected    | Detected     | Detected    |
| 1479 | A_23_P316472  | DNHD1     | Hs.720080 | dynein heavy chain domain 1 (DNHD1), transcript variant 1, mRNA [NM_144666]                                                                 | Homo sapiens dynein heavy chain domain 1 (DNHD1), transcript variant 1, mRNA [NM_144666]                                                                 | 3.78053 | up | 4.90939  | up | 84.83690    | 23.23619   | 117.27170   | 21.06353   | Detected     | Detected    | Detected     | Detected    |

|      |               |              |           |                                                                                |                                                                                                                                              |         |    |         |    |             |            |             |            |             |             |             |             |
|------|---------------|--------------|-----------|--------------------------------------------------------------------------------|----------------------------------------------------------------------------------------------------------------------------------------------|---------|----|---------|----|-------------|------------|-------------|------------|-------------|-------------|-------------|-------------|
| 1480 | A_23_P79231   | CREB1        | Hs.516646 | cAMP responsive element binding protein 1                                      | Homo sapiens cAMP responsive element binding protein 1 (CREB1), transcript variant B, mRNA [NM_134442]                                       | 3.77870 | up | 3.88405 | up | 445.98395   | 122.21092  | 267.75995   | 60.78926   | Detected    | Detected    | Detected    | Detected    |
| 1481 | A_23_P214139  | REV3L        | Hs.232021 | REV3-like, catalytic subunit of DNA polymerase zeta (yeast)                    | Homo sapiens REV3-like, catalytic subunit of DNA polymerase zeta (yeast) (REV3L), mRNA [NM_002912]                                           | 3.77566 | up | 3.83687 | up | 7977.15970  | 2187.70480 | 5887.04440  | 1352.96420 | Detected    | Detected    | Detected    | Detected    |
| 1482 | A_23_P3956    | C1QTNF1      | Hs.201398 | C1q and tumor necrosis factor related protein 1                                | Homo sapiens C1q and tumor necrosis factor related protein 1 (C1QTNF1), mRNA [NM_198594]                                                     | 3.77415 | up | 3.76233 | up | 619.57990   | 169.98517  | 639.86290   | 149.96681  | Detected    | Detected    | Detected    | Detected    |
| 1483 | A_23_P382835  | P2RY1        | Hs.654526 | purinergic receptor P2Y, G-protein coupled, 1                                  | Homo sapiens purinergic receptor P2Y, G-protein coupled, 1 (P2RY1), mRNA [NM_002563]                                                         | 3.77395 | up | 1.83752 | up | 17.15684    | 4.70732    | 5.47658     | 2.62810    | Detected    | Compromised | Compromised | Compromised |
| 1484 | A_33_P3368695 | HES7         | Hs.434828 | hairly and enhancer of split 7 (Drosophila)                                    | Homo sapiens hairy and enhancer of split 7 (Drosophila) (HES7), transcript variant 1, mRNA [NM_001165967]                                    | 3.77028 | up | 2.88273 | up | 161.90022   | 44.46381   | 94.14091    | 28.79653   | Detected    | Detected    | Detected    | Detected    |
| 1485 | A_23_P105619  | TMEM116      | Hs.506815 | transmembrane protein 116                                                      | Homo sapiens transmembrane protein 116 (TMEM116), mRNA [NM_138341]                                                                           | 3.76817 | up | 3.72310 | up | 427.42422   | 117.45231  | 390.12170   | 92.39768   | Detected    | Detected    | Detected    | Detected    |
| 1486 | A_23_P99642   | SLC7A7       | Hs.513147 | solute carrier family 7 (cationic amino acid transporter, y+ system), member 7 | Homo sapiens solute carrier family 7 (cationic amino acid transporter, y+ system), member 7 (SLC7A7), transcript variant 1, mRNA [NM_003982] | 3.76810 | up | 3.91321 | up | 765.40125   | 210.32936  | 527.87520   | 118.94975  | Detected    | Detected    | Detected    | Detected    |
| 1487 | A_23_P129358  | SETD6        | Hs.460923 | SET domain containing 6                                                        | Homo sapiens SET domain containing 6 (SETD6), transcript variant 2, mRNA [NM_024860]                                                         | 3.76806 | up | 3.89688 | up | 816.05230   | 224.25023  | 497.02030   | 112.46640  | Detected    | Detected    | Detected    | Detected    |
| 1488 | A_33_P3394140 | LOC283050    |           | hypothetical LOC283050                                                         | Homo sapiens hypothetical LOC283050 (LOC283050), transcript variant 1, non-coding RNA [NR_024431]                                            | 3.76802 | up | 3.92239 | up | 5194.86230  | 1427.55730 | 3780.84230  | 849.96936  | Detected    | Detected    | Detected    | Detected    |
| 1489 | A_23_P404965  | GNL1         | Hs.654655 | guanine nucleotide binding protein-like 1                                      | Guanine nucleotide-binding protein-like 1 (GTP-binding protein HSR1) [Source:UniProtKB/Swiss-Prot;Acc:P36915] [ENST00000376621]              | 3.76600 | up | 3.79170 | up | 6723.96040  | 1848.74950 | 4459.11430  | 1037.00330 | Detected    | Detected    | Detected    | Detected    |
| 1490 | A_23_P422245  | C5orf36      | Hs.425123 | chromosome 5 open reading frame 36                                             | Homo sapiens chromosome 5 open reading frame 36 (C5orf36), transcript variant 2, mRNA [NM_173665]                                            | 3.76260 | up | 2.06609 | up | 12.64150    | 3.47892    | 7.01882     | 2.99558    | Detected    | Compromised | Compromised | Compromised |
| 1491 | A_24_P275585  | IQCH         | Hs.657894 | IQ motif containing H                                                          | Homo sapiens IQ motif containing H (IQCH), transcript variant 2, mRNA [NM_022784]                                                            | 3.76187 | up | 2.08700 | up | 40.62959    | 11.18335   | 35.52412    | 15.00952   | Detected    | Compromised | Detected    | Compromised |
| 1492 | A_23_P7684    | CCNJL        | Hs.14070  | cyclin J-like                                                                  | Homo sapiens cyclin J-like (CCNJL), mRNA [NM_024565]                                                                                         | 3.76053 | up | 3.26124 | up | 12.07663    | 3.32529    | 20.28200    | 5.48395    | Compromised | Compromised | Detected    | Compromised |
| 1493 | A_24_P481375  | LOC100131564 | Hs.648647 | hypothetical protein LOC100131564                                              | Homo sapiens mRNA: cDNA DKFZp667D2123 (from clone DKFZp667D2123) [AL832786]                                                                  | 3.75806 | up | 4.74721 | up | 362.46060   | 99.86876   | 189.64716   | 35.22683   | Detected    | Detected    | Detected    | Detected    |
| 1494 | A_23_P99360   | TRIM13       | Hs.436922 | tripartite motif-containing 13                                                 | Homo sapiens tripartite motif-containing 13 (TRIM13), transcript variant 3, mRNA [NM_213590]                                                 | 3.75761 | up | 4.94596 | up | 1300.43030  | 358.35098  | 1649.46260  | 294.07470  | Detected    | Detected    | Detected    | Detected    |
| 1495 | A_24_P413669  | PFKFB2       | Hs.282702 | 6-phosphofructo-2-kinase/fructose-2,6-bisphosphatase 2                         | Homo sapiens 6-phosphofructo-2-kinase/fructose-2,6-bisphosphatase 2 (PFKFB2), transcript variant 2, mRNA [NM_001018053]                      | 3.75458 | up | 4.04421 | up | 30.80143    | 8.49458    | 15.60664    | 3.40284    | Detected    | Compromised | Compromised | Compromised |
| 1496 | A_33_P3240652 |              |           |                                                                                |                                                                                                                                              | 3.75387 | up | 4.13103 | up | 37.31189    | 10.29204   | 37.89582    | 8.08906    | Detected    | Compromised | Detected    | Compromised |
| 1497 | A_24_P38143   | AHI1         | Hs.386684 | Abelson helper integration site 1                                              | Homo sapiens Abelson helper integration site 1 (AHI1), transcript variant 2, mRNA [NM_017651]                                                | 3.75284 | up | 3.98535 | up | 1246.55310  | 343.94090  | 782.93260   | 173.23033  | Detected    | Detected    | Detected    | Detected    |
| 1498 | A_33_P3298159 | PTGDS        | Hs.446429 | prostaglandin D2 synthase 21kDa (brain)                                        | Homo sapiens prostaglandin D2 synthase 21kDa (brain) (PTGDS), mRNA [NM_000954]                                                               | 3.75108 | up | 3.69373 | up | 12328.52900 | 3403.20300 | 13469.03200 | 3215.41100 | Detected    | Detected    | Detected    | Detected    |
| 1499 | A_33_P3221408 | NTNG1        | Hs.657434 | netrin G1                                                                      | Homo sapiens netrin G1 (NTNG1), transcript variant 1, mRNA [NM_001113226]                                                                    | 3.74984 | up | 3.72312 | up | 3468.41600  | 957.74940  | 2579.15820  | 610.85266  | Detected    | Detected    | Detected    | Detected    |
| 1500 | A_33_P3892608 | KCNT2        | Hs.657046 | potassium channel, subfamily T, member 2                                       | Homo sapiens potassium channel, subfamily T, member 2 (KCNT2), mRNA [NM_199503]                                                              | 3.74967 | up | 1.89389 | up | 15.01386    | 4.14603    | 7.49889     | 3.48727    | Detected    | Compromised | Compromised | Compromised |
| 1501 | A_32_P130630  | SLC16A7      | Hs.439643 | solute carrier family 16, member 7 (monocarboxylic acid transporter 2)         | Homo sapiens solute carrier family 16, member 7 (monocarboxylic acid transporter 2) (SLC16A7), mRNA [NM_004731]                              | 3.74918 | up | 2.45916 | up | 91.78311    | 25.34896   | 65.52706    | 23.49634   | Detected    | Detected    | Detected    | Detected    |
| 1502 | A_23_P145424  | KIAA1009     | Hs.485865 | KIAA1009                                                                       | Homo sapiens KIAA1009 (KIAA1009), mRNA [NM_014895]                                                                                           | 3.74719 | up | 4.59266 | up | 435.30176   | 120.28680  | 266.60367   | 51.18790   | Detected    | Detected    | Detected    | Detected    |
| 1503 | A_32_P46840   | LOC729680    | Hs.130652 | hypothetical protein LOC729680                                                 | PREDICTED: Homo sapiens hypothetical protein LOC729680 (LOC729680), miscRNA [XR_040503]                                                      | 3.74645 | up | 3.94487 | up | 1055.80350  | 291.80753  | 991.79584   | 221.69432  | Detected    | Detected    | Detected    | Detected    |
| 1504 | A_23_P50081   | IMPA2        | Hs.720058 | inositol(myo)-1-(or 4)-monophosphatase 2                                       | Homo sapiens inositol(myo)-1-(or 4)-monophosphatase 2 (IMPA2), mRNA [NM_014214]                                                              | 3.74426 | up | 3.55023 | up | 7392.97460  | 2044.49670 | 6137.30760  | 1524.36000 | Detected    | Detected    | Detected    | Detected    |
| 1505 | A_33_P3333777 | LOC100129387 | Hs.720669 | hypothetical LOC100129387                                                      | Homo sapiens hypothetical LOC100129387 (LOC100129387), non-coding RNA [NR_024490]                                                            | 3.74167 | up | 3.59364 | up | 404.24475   | 111.86959  | 393.32663   | 96.51258   | Detected    | Detected    | Detected    | Detected    |
| 1506 | A_23_P398566  | NR4A3        | Hs.279522 | nuclear receptor subfamily 4, group A, member 3                                | Homo sapiens nuclear receptor subfamily 4, group A, member 3 (NR4A3), transcript variant 2, mRNA [NM_173198]                                 | 3.74140 | up | 4.20297 | up | 644.86800   | 178.47185  | 622.18320   | 130.53502  | Detected    | Detected    | Detected    | Detected    |
| 1507 | A_24_P174503  | AMT          | Hs.102    | aminomethyltransferase                                                         | Homo sapiens aminomethyltransferase (AMT), nuclear gene encoding mitochondrial protein, transcript variant 1, mRNA [NM_000481]               | 3.73965 | up | 4.25946 | up | 196.88203   | 54.51399   | 152.47295   | 31.56484   | Detected    | Detected    | Detected    | Detected    |
| 1508 | A_23_P216225  | EGR3         | Hs.534313 | early growth response 3                                                        | Homo sapiens early growth response 3 (EGR3), mRNA [NM_004430]                                                                                | 3.73655 | up | 5.46198 | up | 279.88803   | 77.56148   | 216.44210   | 34.94274   | Detected    | Detected    | Detected    | Detected    |
| 1509 | A_33_P3773168 | LOC285768    | Hs.209463 | hypothetical LOC285768                                                         | Homo sapiens hypothetical LOC285768 (LOC285768), non-coding RNA [NR_027115]                                                                  | 3.73592 | up | 1.71572 | up | 14.21312    | 3.93935    | 6.81712     | 3.50364    | Detected    | Compromised | Compromised | Compromised |

|      |               |           |           |                                                                                                    |                                                                                                                                                                   |         |    |          |    |             |             |             |             |          |             |             |             |
|------|---------------|-----------|-----------|----------------------------------------------------------------------------------------------------|-------------------------------------------------------------------------------------------------------------------------------------------------------------------|---------|----|----------|----|-------------|-------------|-------------|-------------|----------|-------------|-------------|-------------|
| 1510 | A_33_P3273584 | SCARNA2   | Hs.550815 | small Cajal body-specific RNA 2                                                                    | Homo sapiens small Cajal body-specific RNA 2 (SCARNA2), guide RNA [NR_003023]                                                                                     | 3.73534 | up | 3.43040  | up | 398.76890   | 110.54126   | 349.17383   | 89.75574    | Detected | Detected    | Detected    | Detected    |
| 1511 | A_24_P70117   | DTWD1     | Hs.127432 | DTW domain containing 1                                                                            | Homo sapiens DTW domain containing 1 (DTWD1), transcript variant 1, mRNA [NM_020234]                                                                              | 3.73495 | up | 3.80609  | up | 2518.18950  | 698.12976   | 2234.94300  | 517.78920   | Detected | Detected    | Detected    | Detected    |
| 1512 | A_33_P3390057 | TM4SF1    | Hs.351316 | transmembrane 4 L six family member 1                                                              | Homo sapiens transmembrane 4 L six family member 1 (TM4SF1), mRNA [NM_014202]                                                                                     | 3.73289 | up | 3.13430  | up | 87213.04000 | 24191.88900 | 55772.64500 | 15690.85500 | Detected | Detected    | Detected    | Detected    |
| 1513 | A_24_P60500   | BDH2      | Hs.124696 | 3-hydroxybutyrate dehydrogenase, type 2                                                            | Homo sapiens 3-hydroxybutyrate dehydrogenase, type 2 (BDH2), mRNA [NM_020139]                                                                                     | 3.73060 | up | 3.39669  | up | 159.72878   | 44.33409    | 138.96709   | 36.07628    | Detected | Detected    | Detected    | Detected    |
| 1514 | A_33_P3854030 | MBD5      | Hs.458312 | methyl-CpG binding domain protein 5                                                                | Homo sapiens methyl-CpG binding domain protein 5 (MBD5), mRNA [NM_018328]                                                                                         | 3.72926 | up | 4.01712  | up | 451.67593   | 125.41161   | 422.66632   | 92.77867    | Detected | Detected    | Detected    | Detected    |
| 1515 | A_33_P3390187 | NHLRC4    | Hs.664267 | NHL repeat containing 4                                                                            | Homo sapiens NHL repeat containing 4 (NHLRC4), mRNA [NM_176677]                                                                                                   | 3.72559 | up | 2.26201  | up | 26.81049    | 7.45149     | 25.40453    | 9.90337     | Detected | Compromised | Detected    | Compromised |
| 1516 | A_23_P52676   | CATSPER1  | Hs.189105 | cation channel, sperm associated 1                                                                 | Homo sapiens cation channel, sperm associated 1 (CATSPER1), mRNA [NM_053054]                                                                                      | 3.72455 | up | 3.72468  | up | 313.74683   | 87.22459    | 431.14017   | 102.06937   | Detected | Detected    | Detected    | Detected    |
| 1517 | A_33_P3396379 |           |           |                                                                                                    | Putative uncharacterized protein ENSP0000380831 Fragment [Source:UniProtKB/T/EMBL/CC/AGMZ5] [ENST00000397494]                                                     | 3.72421 | up | 4.07395  | up | 37.09197    | 10.31286    | 51.21211    | 11.08465    | Detected | Compromised | Detected    | Compromised |
| 1518 | A_33_P3371115 | AQP7P3    | Hs.658215 | aquaporin 7 pseudogene 3                                                                           | Homo sapiens aquaporin 7 pseudogene 3 (AQP7P3), non-coding RNA [NR_026558]                                                                                        | 3.72384 | up | 5.42389  | up | 463.08527   | 128.76651   | 370.10010   | 60.16909    | Detected | Detected    | Detected    | Detected    |
| 1519 | A_23_P91910   | PLSCR4    | Hs.477869 | phospholipid scramblase 4                                                                          | Homo sapiens phospholipid scramblase 4 (PLSCR4), transcript variant 2, mRNA [NM_020353]                                                                           | 3.72279 | up | 4.15875  | up | 3377.51700  | 939.42500   | 2422.62330  | 513.67535   | Detected | Detected    | Detected    | Detected    |
| 1520 | A_33_P3392320 | SLC6A15   | Hs.44424  | solute carrier family 6 (neutral amino acid transporter), member 15                                | Homo sapiens solute carrier family 6 (neutral amino acid transporter), member 15 (SLC6A15), transcript variant 2, mRNA [NM_018057]                                | 3.72251 | up | 5.01654  | up | 118.91280   | 33.07696    | 119.35487   | 20.97982    | Detected | Detected    | Detected    | Detected    |
| 1521 | A_33_P3334923 | LOC338758 |           | hypothetical LOC338758                                                                             | Homo sapiens hypothetical LOC338758 (LOC338758), non-coding RNA [NR_028138]                                                                                       | 3.72069 | up | 3.02574  | up | 78.34594    | 21.80352    | 63.77973    | 18.58729    | Detected | Detected    | Detected    | Detected    |
| 1522 | A_23_P83200   | C9orf98   | Hs.421340 | chromosome 9 open reading frame 98                                                                 | Homo sapiens chromosome 9 open reading frame 98 (C9orf98), mRNA [NM_152572]                                                                                       | 3.72054 | up | 3.72767  | up | 116.43977   | 32.40622    | 114.06912   | 26.98334    | Detected | Detected    | Detected    | Detected    |
| 1523 | A_23_P320242  | KIAA1324L | Hs.208093 | KIAA1324-like                                                                                      | Homo sapiens KIAA1324-like (KIAA1324L), transcript variant 2, mRNA [NM_152748]                                                                                    | 3.71749 | up | 3.75358  | up | 535.53830   | 149.16720   | 405.43512   | 95.24467    | Detected | Detected    | Detected    | Detected    |
| 1524 | A_33_P3663974 | THRB      | Hs.187861 | thyroid hormone receptor, beta (erythroblastic leukemia viral (v-erb-a) oncogene homolog 2, avian) | Homo sapiens thyroid hormone receptor, beta (erythroblastic leukemia viral (v-erb-a) oncogene homolog 2, avian) (THRB), transcript variant 3, mRNA [NM_001128177] | 3.71528 | up | 3.94270  | up | 106.54867   | 29.69543    | 96.40772    | 21.56174    | Detected | Detected    | Detected    | Detected    |
| 1525 | A_33_P3302165 | ABHD8     | Hs.515664 | abhydrolase domain containing 8                                                                    | Homo sapiens abhydrolase domain containing 8 (ABHD8), mRNA [NM_024527]                                                                                            | 3.70954 | up | 3.55298  | up | 9800.42000  | 2735.63090  | 9515.56700  | 2361.60840  | Detected | Detected    | Detected    | Detected    |
| 1526 | A_33_P3782469 | PYGO1     | Hs.87194  | pygopus homolog 1 (Drosophila)                                                                     | Pygopus homolog 1 [Source:UniProtKB/Swiss-Prot/CC/Q9Y3Y4] [ENST00000302000]                                                                                       | 3.70729 | up | 3.42496  | up | 451.14478   | 126.00648   | 285.68118   | 73.55151    | Detected | Detected    | Detected    | Detected    |
| 1527 | A_23_P257164  | AMT       | Hs.102    | aminomethyltransferase                                                                             | Homo sapiens aminomethyltransferase (AMT), nuclear gene encoding mitochondrial protein, transcript variant 1, mRNA [NM_000461]                                    | 3.70192 | up | 4.14602  | up | 344.69950   | 96.41560    | 358.31924   | 76.20873    | Detected | Detected    | Detected    | Detected    |
| 1528 | A_23_P253791  | CAMP      | Hs.51120  | cathelicidin antimicrobial peptide                                                                 | Homo sapiens cathelicidin antimicrobial peptide (CAMP), mRNA [NM_004345]                                                                                          | 3.70175 | up | 3.58406  | up | 15.02276    | 4.20219     | 10.54299    | 2.59391     | Detected | Compromised | Compromised | Compromised |
| 1529 | A_33_P3560878 | LOC283587 | Hs.525513 | hypothetical protein LOC283587                                                                     | Homo sapiens cDNA clone IMAGE:4734409 [BC029479]                                                                                                                  | 3.69999 | up | 14.89842 | up | 106.59161   | 29.83018    | 51.57369    | 3.05249     | Detected | Detected    | Detected    | Compromised |
| 1530 | A_23_P140821  | PARDA6A   | Hs.112933 | par-6 partitioning defective 6 homolog alpha (C. elegans)                                          | Homo sapiens par-6 partitioning defective 6 homolog alpha (C. elegans) (PARDA6A), transcript variant 1, mRNA [NM_016948]                                          | 3.69848 | up | 2.43429  | up | 38.57728    | 10.80045    | 62.34737    | 22.58453    | Detected | Compromised | Detected    | Detected    |
| 1531 | A_23_P158533  | DEAF1     | Hs.243994 | deformed epidermal autoregulatory factor 1 (Drosophila)                                            | Homo sapiens deformed epidermal autoregulatory factor 1 (Drosophila) (DEAF1), mRNA [NM_021008]                                                                    | 3.69600 | up | 3.31597  | up | 4040.31840  | 1131.92360  | 3767.96040  | 1001.98490  | Detected | Detected    | Detected    | Detected    |
| 1532 | A_33_P3220663 | STAC3     | Hs.417595 | SH3 and cysteine rich domain 3                                                                     | Homo sapiens SH3 and cysteine rich domain 3 (STAC3), mRNA [NM_145064]                                                                                             | 3.69383 | up | 3.55879  | up | 568.72205   | 159.42508   | 479.86017   | 118.89889   | Detected | Detected    | Detected    | Detected    |
| 1533 | A_33_P3328559 | TBC1D10C  | Hs.534648 | TBC1 domain family, member 10C                                                                     | Homo sapiens TBC1 domain family, member 10C (TBC1D10C), mRNA [NM_198517]                                                                                          | 3.69353 | up | 6.45684  | up | 128.47165   | 36.01627    | 139.85380   | 19.09940    | Detected | Detected    | Detected    | Detected    |
| 1534 | A_23_P64044   | FERMT3    | Hs.180535 | fermitin family homolog 3 (Drosophila)                                                             | Homo sapiens fermitin family homolog 3 (Drosophila) (FERMT3), transcript variant URP2LF, mRNA [NM_178443]                                                         | 3.69286 | up | 3.25611  | up | 125.23417   | 35.11507    | 151.92232   | 41.14222    | Detected | Detected    | Detected    | Detected    |
| 1535 | A_33_P3374087 | RBM44     | Hs.720233 | RNA binding motif protein 44                                                                       | Homo sapiens RNA binding motif protein 44 (RBM44), mRNA [NM_001080504]                                                                                            | 3.69253 | up | 3.60037  | up | 19.65494    | 5.51164     | 18.68643    | 4.57662     | Detected | Compromised | Detected    | Compromised |
| 1536 | A_33_P3309556 | PTPRE     | Hs.127022 | protein tyrosine phosphatase, receptor type, E                                                     | Homo sapiens protein tyrosine phosphatase, receptor type, E (PTPRE), transcript variant 1, mRNA [NM_006504]                                                       | 3.69219 | up | 5.53012  | up | 354.99945   | 99.55811    | 188.11212   | 29.99493    | Detected | Detected    | Detected    | Detected    |

|      |               |                 |           |                                                                                                              |                                                                                                                                                                                                                                                     |         |    |         |    |              |             |              |             |             |             |             |             |
|------|---------------|-----------------|-----------|--------------------------------------------------------------------------------------------------------------|-----------------------------------------------------------------------------------------------------------------------------------------------------------------------------------------------------------------------------------------------------|---------|----|---------|----|--------------|-------------|--------------|-------------|-------------|-------------|-------------|-------------|
| 1537 | A_33_P3420392 |                 |           |                                                                                                              | Xaa-Pro aminopeptidase 2 Precursor (EC 3.4.11.9)(X-Pro aminopeptidase 2)(Membrane-bound aminopeptidase P)(Membrane-bound APP)(Membrane-bound Amp)(mAmP)(Aminoacylproline aminopeptidase) [Source:UniProtKB/Swiss-Prot;Acc:O43895] [ENST00000371105] | 3.69002 | up | 5.86501 | up | 96.36507     | 27.04108    | 55.49580     | 8.34367     | Detected    | Detected    | Detected    | Compromised |
| 1538 | A_33_P3618429 | PRKXP1          | Hs.12250  | protein kinase, X-linked, pseudogene 1                                                                       | Homo sapiens cDNA FLJ38474 fis, clone FEBRA202255 [AK095793]                                                                                                                                                                                        | 3.68867 | up | 3.43208 | up | 1432.22000   | 402.04300   | 817.58410    | 210.05856   | Detected    | Detected    | Detected    | Detected    |
| 1539 | A_23_P431268  | PLEKHA6         | Hs.253146 | pleckstrin homology domain containing, family A member 6                                                     | Homo sapiens pleckstrin homology domain containing, family A member 6 (PLEKHA6), mRNA [NM_014935]                                                                                                                                                   | 3.68816 | up | 1.34745 | up | 34.45024     | 9.67197     | 17.41927     | 11.39942    | Detected    | Compromised | Detected    | Compromised |
| 1540 | A_33_P3421626 | KIAA1147        | Hs.521240 | KIAA1147                                                                                                     | Homo sapiens KIAA1147 (KIAA1147), mRNA [NM_001080392]                                                                                                                                                                                               | 3.68709 | up | 4.04137 | up | 926.03400    | 260.06198   | 502.30463    | 109.59837   | Detected    | Detected    | Detected    | Detected    |
| 1541 | A_24_P190877  | C1orf25         | Hs.107149 | chromosome 1 open reading frame 25                                                                           | Homo sapiens chromosome 1 open reading frame 25 (C1orf25), mRNA [NM_030934]                                                                                                                                                                         | 3.68474 | up | 4.09297 | up | 287.19424    | 80.70522    | 192.66612    | 41.50810    | Detected    | Detected    | Detected    | Detected    |
| 1542 | A_23_P127584  | NNMT            | Hs.503911 | nicotinamide N-methyltransferase                                                                             | Homo sapiens nicotinamide N-methyltransferase (NNMT), mRNA [NM_006169]                                                                                                                                                                              | 3.68432 | up | 3.03852 | up | 163610.11000 | 45981.79700 | 119643.73400 | 34721.07000 | Detected    | Detected    | Detected    | Detected    |
| 1543 | A_33_P3264042 | EFCAB3          | Hs.152670 | EF-hand calcium binding domain 3                                                                             | Homo sapiens EF-hand calcium binding domain 3 (EFCAB3), transcript variant 1, mRNA [NM_001144933]                                                                                                                                                   | 3.68135 | up | 2.01426 | up | 14.19927     | 3.99385     | 11.43922     | 5.00779     | Detected    | Compromised | Compromised | Compromised |
| 1544 | A_23_P58443   | ANKHD1-EIF4EBP3 | Hs.594084 | ANKHD1-EIF4EBP3 readthrough transcript                                                                       | Homo sapiens ANKHD1-EIF4EBP3 readthrough transcript (ANKHD1-EIF4EBP3), mRNA [NM_020600]                                                                                                                                                             | 3.67835 | up | 3.67855 | up | 1667.69200   | 469.45703   | 1574.97050   | 377.53854   | Detected    | Detected    | Detected    | Detected    |
| 1545 | A_23_P45324   | TMEM35          | Hs.45140  | transmembrane protein 35                                                                                     | Homo sapiens transmembrane protein 35 (TMEM35), mRNA [NM_021637]                                                                                                                                                                                    | 3.67728 | up | 3.06981 | up | 3834.39260   | 1079.70020  | 2609.58500   | 749.59360   | Detected    | Detected    | Detected    | Detected    |
| 1546 | A_23_P383590  | LOC339524       | Hs.306423 | hypothetical LOC339524                                                                                       | Homo sapiens hypothetical LOC339524 (LOC339524), transcript variant 1, non-coding RNA [NR_026985]                                                                                                                                                   | 3.67488 | up | 7.95340 | up | 13.06541     | 3.68140     | 28.09778     | 3.11519     | Compromised | Compromised | Detected    | Compromised |
| 1547 | A_24_P371053  | ORMDL1          | Hs.700632 | ORM1-like 1 (S. cerevisiae)                                                                                  | Homo sapiens ORM1-like 1 (S. cerevisiae) (ORMDL1), transcript variant 1, mRNA [NM_016467]                                                                                                                                                           | 3.67375 | up | 4.06675 | up | 789.61300    | 222.55550   | 594.88104    | 128.98763   | Detected    | Detected    | Detected    | Detected    |
| 1548 | A_33_P3282688 |                 | Hs.640142 |                                                                                                              | Putative uncharacterized protein ENSP00000366511 [Source:UniProtKB/TrEMBL;Acc:B7WP54] [ENST00000377296]                                                                                                                                             | 3.67129 | up | 3.98879 | up | 661.98737    | 186.70863   | 427.74700    | 94.56090    | Detected    | Detected    | Detected    | Detected    |
| 1549 | A_33_P3229215 | C1orf203        | Hs.664752 | chromosome 1 open reading frame 203                                                                          | Homo sapiens chromosome 1 open reading frame 203 (C1orf203), transcript variant 3, non-coding RNA [NR_024126]                                                                                                                                       | 3.66858 | up | 2.49668 | up | 19.91217     | 5.62022     | 17.97032     | 6.34684     | Detected    | Compromised | Detected    | Compromised |
| 1550 | A_32_P202759  | FAM171B         | Hs.28872  | family with sequence similarity 171, member B                                                                | Homo sapiens family with sequence similarity 171, member B (FAM171B), mRNA [NM_177454]                                                                                                                                                              | 3.66674 | up | 2.40821 | up | 82.00626     | 23.15795    | 70.66210     | 25.87360    | Detected    | Detected    | Detected    | Detected    |
| 1551 | A_23_P416711  | ST6GALNAC3      | Hs.337040 | ST6 (alpha-N-acetylneuraminyl-2,3-beta-galactosyl-1,3)-N-acetylgalactosaminide alpha-2,6-sialyltransferase 3 | Homo sapiens ST6 (alpha-N-acetylneuraminyl-2,3-beta-galactosyl-1,3)-N-acetylgalactosaminide alpha-2,6-sialyltransferase 3 (ST6GALNAC3), transcript variant 1, mRNA [NM_152996]                                                                      | 3.66537 | up | 3.76077 | up | 75.69702     | 21.38424    | 52.05541     | 12.20548    | Detected    | Detected    | Detected    | Compromised |
| 1552 | A_33_P3225522 | OAS2            | Hs.414332 | 2'-5'-oligoadenylate synthetase 2, 69/71kDa                                                                  | Homo sapiens 2'-5'-oligoadenylate synthetase 2, 69/71kDa (OAS2), transcript variant 3, mRNA [NM_001032731]                                                                                                                                          | 3.66501 | up | 1.62968 | up | 795.27090    | 224.68470   | 279.25027    | 151.09770   | Detected    | Detected    | Detected    | Detected    |
| 1553 | A_23_P352950  | PNMA5           | Hs.573567 | paraneoplastic antigen like 5                                                                                | Homo sapiens paraneoplastic antigen like 5 (PNMA5), transcript variant 3, mRNA [NM_052926]                                                                                                                                                          | 3.66459 | up | 6.36860 | up | 2440.80350   | 689.66930   | 2165.92100   | 299.89140   | Detected    | Detected    | Detected    | Detected    |
| 1554 | A_23_P131899  | SDCBP2          | Hs.657015 | syndecan binding protein (syntenin) 2                                                                        | Homo sapiens syndecan binding protein (syntenin) 2 (SDCBP2), transcript variant 1, mRNA [NM_060489]                                                                                                                                                 | 3.66257 | up | 3.35063 | up | 3894.30640   | 1100.97550  | 4416.45200   | 1162.28630  | Detected    | Detected    | Detected    | Detected    |
| 1555 | A_33_P3615922 | C7orf63         | Hs.657403 | chromosome 7 open reading frame 63                                                                           | Homo sapiens chromosome 7 open reading frame 63 (C7orf63), transcript variant 1, mRNA [NM_001039706]                                                                                                                                                | 3.66080 | up | 6.91279 | up | 68.84095     | 19.47169    | 42.75375     | 5.45364     | Detected    | Compromised | Detected    | Compromised |
| 1556 | A_23_P82979   | LAMC3           | Hs.201805 | laminin, gamma 3                                                                                             | Homo sapiens laminin, gamma 3 (LAMC3), mRNA [NM_006059]                                                                                                                                                                                             | 3.66019 | up | 6.85817 | up | 338.02580    | 95.62666    | 394.93204    | 50.77848    | Detected    | Detected    | Detected    | Detected    |
| 1557 | A_24_P605081  | LOC253039       | Hs.594170 | hypothetical LOC253039                                                                                       | Homo sapiens hypothetical LOC253039 (LOC253039), non-coding RNA [NR_024408]                                                                                                                                                                         | 3.65857 | up | 4.55239 | up | 25.43391     | 7.19838     | 16.36787     | 3.17043     | Detected    | Compromised | Detected    | Compromised |
| 1558 | A_32_P197561  | EBF1            | Hs.573143 | early B-cell factor 1                                                                                        | Homo sapiens early B-cell factor 1 (EBF1), mRNA [NM_024007]                                                                                                                                                                                         | 3.65833 | up | 3.72375 | up | 1812.24180   | 512.94040   | 1323.90030   | 313.50220   | Detected    | Detected    | Detected    | Detected    |
| 1559 | A_23_P420236  | PCDH9           | Hs.654709 | protocadherin 9                                                                                              | Homo sapiens protocadherin 9 (PCDH9), transcript variant 1, mRNA [NM_203487]                                                                                                                                                                        | 3.65730 | up | 1.30611 | up | 17.59978     | 4.98287     | 9.23901      | 6.23751     | Detected    | Compromised | Compromised | Compromised |
| 1560 | A_33_P3440636 | LOC286071       | Hs.410678 | hypothetical protein LOC286071                                                                               | Homo sapiens cDNA FLJ34440 fis, clone HLUNG2001214 [AK091759]                                                                                                                                                                                       | 3.65721 | up | 3.62960 | up | 98.07129     | 27.76676    | 41.96167     | 10.19434    | Detected    | Detected    | Detected    | Compromised |
| 1561 | A_23_P160240  | ACP6            | Hs.582154 | acid phosphatase 6, lysophosphatidic                                                                         | Homo sapiens acid phosphatase 6, lysophosphatidic (ACP6), mRNA [NM_016361]                                                                                                                                                                          | 3.65554 | up | 3.26002 | up | 285.65872    | 80.91502    | 333.53930    | 90.21769    | Detected    | Detected    | Detected    | Detected    |
| 1562 | A_23_P14673   | IGDCC4          | Hs.458607 | immunoglobulin superfamily, DCC subclass, member 4                                                           | Homo sapiens immunoglobulin superfamily, DCC subclass, member 4 (IGDCC4), mRNA [NM_020962]                                                                                                                                                          | 3.65551 | up | 3.66911 | up | 406.11694    | 115.03668   | 249.56769    | 59.97808    | Detected    | Detected    | Detected    | Detected    |
| 1563 | A_23_P384044  | CNIH3           | Hs.28659  | cornichon homolog 3 (Drosophila)                                                                             | Homo sapiens cornichon homolog 3 (Drosophila) (CNIH3), mRNA [NM_152495]                                                                                                                                                                             | 3.65547 | up | 3.59904 | up | 15682.16600  | 4442.17700  | 15978.98500  | 3914.97100  | Detected    | Detected    | Detected    | Detected    |
| 1564 | A_23_P157569  | ADHFE1          | Hs.720023 | alcohol dehydrogenase, iron containing, 1                                                                    | Homo sapiens alcohol dehydrogenase, iron containing, 1 (ADHFE1), nuclear gene encoding mitochondrial protein, mRNA [NM_144650]                                                                                                                      | 3.65369 | up | 4.13561 | up | 284.59665    | 80.65495    | 208.03200    | 44.35641    | Detected    | Detected    | Detected    | Detected    |

|      |               |              |           |                                                                                                |                                                                                                                                             |         |    |         |    |             |            |             |            |              |             |             |             |
|------|---------------|--------------|-----------|------------------------------------------------------------------------------------------------|---------------------------------------------------------------------------------------------------------------------------------------------|---------|----|---------|----|-------------|------------|-------------|------------|--------------|-------------|-------------|-------------|
| 1565 | A_24.P150466  | SMOC1        | Hs.497349 | SPARC related modular calcium binding 1                                                        | Homo sapiens SPARC related modular calcium binding 1 (SMOC1), transcript variant 1, mRNA [NM_001034852]                                     | 3.65205 | up | 3.53678 | up | 1984.49010  | 562.65860  | 2292.87040  | 571.65857  | Detected     | Detected    | Detected    | Detected    |
| 1566 | A_23.P3212    | DTWD1        | Hs.127432 | DTW domain containing 1                                                                        | Homo sapiens DTW domain containing 1 (DTWD1), transcript variant 1, mRNA [NM_020234]                                                        | 3.65192 | up | 3.79882 | up | 7187.43460  | 2037.91470 | 5620.43750  | 1304.62770 | Detected     | Detected    | Detected    | Detected    |
| 1567 | A_33.P3228460 | FXD3         | Hs.301350 | FXD domain containing ion transport regulator 3                                                | Homo sapiens FXD domain containing ion transport regulator 3 (FXD3), transcript variant 3, mRNA [NM_001136007]                              | 3.65042 | up | 3.14284 | up | 93.05353    | 26.39510   | 87.39114    | 24.51946   | Detected     | Detected    | Detected    | Detected    |
| 1568 | A_33.P3242369 |              | Hs.689808 |                                                                                                | Homo sapiens PP10881 mRNA, complete cds. [AF370399]                                                                                         | 3.64806 | up | 3.33725 | up | 77.86032    | 22.09975   | 77.11816    | 20.37866   | Detected     | Detected    | Detected    | Detected    |
| 1569 | A_33.P3313302 | PARP6        | Hs.270244 | poly (ADP-ribose) polymerase family, member 6                                                  | Homo sapiens poly (ADP-ribose) polymerase family, member 6 (PARP6), mRNA [NM_020214]                                                        | 3.64801 | up | 3.42680 | up | 1529.34100  | 434.09200  | 1067.67150  | 274.73508  | Detected     | Detected    | Detected    | Detected    |
| 1570 | A_23.P362191  | C17orf44     | Hs.121692 | chromosome 17 open reading frame 44                                                            | Homo sapiens chromosome 17 open reading frame 44 (C17orf44), non-coding RNA [NR_026951]                                                     | 3.64517 | up | 4.74005 | up | 53.05029    | 15.06963   | 60.87252    | 11.32410   | Detected     | Compromised | Detected    | Compromised |
| 1571 | A_24.P186065  | DHFRL1       | Hs.718516 | dihydrofolate reductase-like 1                                                                 | Homo sapiens dihydrofolate reductase-like 1 (DHFRL1), mRNA [NM_178915]                                                                      | 3.64470 | up | 3.77444 | up | 566.89040   | 161.05354  | 307.04030   | 71.73125   | Detected     | Detected    | Detected    | Detected    |
| 1572 | A_33.P3386429 | SEN6         | Hs.485784 | SUMO1/sentrin specific peptidase 6                                                             | Homo sapiens SUMO1/sentrin specific peptidase 6 (SEN6), transcript variant 1, mRNA [NM_015571]                                              | 3.64452 | up | 2.07260 | up | 40.14382    | 11.40541   | 27.55107    | 11.72163   | Detected     | Compromised | Detected    | Compromised |
| 1573 | A_23.P321935  | OSBP2        | Hs.517546 | oxysterol binding protein 2                                                                    | Homo sapiens oxysterol binding protein 2 (OSBP2), transcript variant 1, mRNA [NM_030758]                                                    | 3.64275 | up | 6.74190 | up | 154.94116   | 44.04231   | 155.70500   | 20.36507   | Detected     | Detected    | Detected    | Detected    |
| 1574 | A_24.P102920  | WDR33        |           | WD repeat domain 33                                                                            | WD repeat-containing protein 33 (WD repeat-containing protein WDC146) [Source:UniProtKB/Swiss-Prot;Acc:Q90A08] [ENST00000409658]            | 3.63966 | up | 3.46171 | up | 56.17299    | 15.98086   | 41.71609    | 10.62620   | Detected     | Compromised | Detected    | Compromised |
| 1575 | A_23.P171107  | CCNB3        | Hs.130310 | cyclin B3                                                                                      | Homo sapiens cyclin B3 (CCNB3), transcript variant 3, mRNA [NM_033031]                                                                      | 3.63903 | up | 3.79738 | up | 26.94489    | 7.66697    | 22.54833    | 5.23595    | Detected     | Compromised | Detected    | Compromised |
| 1576 | A_33.P3378665 | TC2N         | Hs.510262 | tandem C2 domains, nuclear                                                                     | Homo sapiens tandem C2 domains, nuclear (TC2N), transcript variant 1, mRNA [NM_152332]                                                      | 3.63840 | up | 4.40217 | up | 161.10220   | 45.84837   | 123.10281   | 24.65850   | Detected     | Detected    | Detected    | Detected    |
| 1577 | A_24.P286114  | SLC1A3       | Hs.481918 | solute carrier family 1 (glial high affinity glutamate transporter), member 3                  | Homo sapiens solute carrier family 1 (glial high affinity glutamate transporter), member 3 (SLC1A3), transcript variant 1, mRNA [NM_004172] | 3.63596 | up | 3.67887 | up | 3182.95340  | 906.45160  | 2142.53700  | 513.54630  | Detected     | Detected    | Detected    | Detected    |
| 1578 | A_23.P66948   | FAM59A       | Hs.444314 | family with sequence similarity 59, member A                                                   | Homo sapiens family with sequence similarity 59, member A (FAM59A), mRNA [NM_022751]                                                        | 3.63315 | up | 3.46723 | up | 1752.63230  | 499.50638  | 1476.24430  | 375.44055  | Detected     | Detected    | Detected    | Detected    |
| 1579 | A_24.P242361  | HS2ST1       | Hs.719144 | heparan sulfate 2-O-sulfotransferase 1                                                         | Homo sapiens heparan sulfate 2-O-sulfotransferase 1 (HS2ST1), transcript variant 1, mRNA [NM_012292]                                        | 3.63004 | up | 3.99284 | up | 3179.04440  | 906.81480  | 1960.46250  | 432.95400  | Detected     | Detected    | Detected    | Detected    |
| 1580 | A_24.P84396   | KIAA1199     | Hs.459088 | KIAA1199                                                                                       | Homo sapiens KIAA1199 (KIAA1199), mRNA [NM_018689]                                                                                          | 3.62596 | up | 3.79346 | up | 220.31958   | 62.91629   | 185.60396   | 43.14364   | Detected     | Detected    | Detected    | Detected    |
| 1581 | A_23.P250735  | CBX7         | Hs.356416 | chromobox homolog 7                                                                            | Homo sapiens chromobox homolog 7 (CBX7), mRNA [NM_175709]                                                                                   | 3.62589 | up | 3.51104 | up | 3417.73500  | 976.01495  | 3322.14840  | 834.35210  | Detected     | Detected    | Detected    | Detected    |
| 1582 | A_23.P170978  | ZNF692       | Hs.377705 | zinc finger protein 692                                                                        | Homo sapiens zinc finger protein 692 (ZNF692), transcript variant 2, mRNA [NM_017865]                                                       | 3.62586 | up | 3.11649 | up | 1319.79170  | 376.90143  | 1346.99580  | 381.12326  | Detected     | Detected    | Detected    | Detected    |
| 1583 | A_32.P78491   | ETV1         | Hs.22634  | ets variant 1                                                                                  | Homo sapiens ets variant 1 (ETV1), transcript variant 1, mRNA [NM_004956]                                                                   | 3.62580 | up | 3.74082 | up | 1174.53590  | 335.42465  | 818.79990   | 193.00845  | Detected     | Detected    | Detected    | Detected    |
| 1584 | A_32.P98683   | MLLT6        | Hs.91531  | myeloid/lymphoid or mixed-lineage leukemia (trithorax homolog, Drosophila); translocated to, 6 | Homo sapiens myeloid/lymphoid or mixed-lineage leukemia (trithorax homolog, Drosophila); translocated to, 6 (MLLT6), mRNA [NM_005937]       | 3.62552 | up | 3.25349 | up | 5771.53960  | 1648.37050 | 5743.26200  | 1556.58940 | Detected     | Detected    | Detected    | Detected    |
| 1585 | A_23.P396299  |              | Hs.246769 |                                                                                                | LOC100129827 protein HCG1991909; [Source:UniProtKB/TrEMBL;Acc:Q8N6V7] [ENST00000324928]                                                     | 3.62485 | up | 6.22258 | up | 13.46622    | 3.84671    | 19.30531    | 2.73572    | Detected     | Compromised | Detected    | Compromised |
| 1586 | A_23.P322253  | NFIL3        | Hs.79334  | nuclear factor, interleukin 3 regulated                                                        | Homo sapiens nuclear factor, interleukin 3 regulated (NFIL3), mRNA [NM_005384]                                                              | 3.62369 | up | 3.74424 | up | 31709.07400 | 9060.78900 | 21012.61100 | 4948.58840 | Detected     | Detected    | Detected    | Detected    |
| 1587 | A_33.P3482466 | LOC100271715 | Hs.99841  | DH and coiled-coil domain-containing protein                                                   | Homo sapiens DH and coiled-coil domain-containing protein (LOC100271715), mRNA [NM_001145451]                                               | 3.62137 | up | 1.42254 | up | 43.01858    | 12.30030   | 17.95940    | 11.13249   | Detected     | Compromised | Detected    | Compromised |
| 1588 | A_23.P134125  | MAP3K5       | Hs.186486 | mitogen-activated protein kinase kinase 5                                                      | Homo sapiens mitogen-activated protein kinase kinase 5 (MAP3K5), mRNA [NM_005923]                                                           | 3.61988 | up | 3.72194 | up | 5312.23050  | 1519.55100 | 3606.47780  | 854.43660  | Detected     | Detected    | Detected    | Detected    |
| 1589 | A_23.P217704  | GYG2         | Hs.567381 | glycogenin 2                                                                                   | Homo sapiens glycogenin 2 (GYG2), transcript variant 2, mRNA [NM_003918]                                                                    | 3.61803 | up | 2.94297 | up | 113.63329   | 32.52123   | 115.74461   | 34.68008   | Detected     | Detected    | Detected    | Detected    |
| 1590 | A_33.P3233125 | PSD          | Hs.154658 | pleckstrin and Sec7 domain containing                                                          | Homo sapiens pleckstrin and Sec7 domain containing (PSD), mRNA [NM_002779]                                                                  | 3.61673 | up | 6.50423 | up | 2574.41260  | 737.04600  | 2469.64550  | 334.81433  | Detected     | Detected    | Detected    | Detected    |
| 1591 | A_23.P81103   | SFRP2        | Hs.481022 | secreted frizzled-related protein 2                                                            | Homo sapiens secreted frizzled-related protein 2 (SFRP2), mRNA [NM_003013]                                                                  | 3.61486 | up | 3.67848 | up | 1752.75280  | 502.06827  | 1930.71290  | 462.82330  | Detected     | Detected    | Detected    | Detected    |
| 1592 | A_33.P3318053 | C17orf69     |           | chromosome 17 open reading frame 69                                                            | Homo sapiens chromosome 17 open reading frame 69 (C17orf69), transcript variant 2, non-coding RNA [NR_026906]                               | 3.61485 | up | 2.85084 | up | 39.50703    | 11.31663   | 20.75252    | 6.41894    | Detected     | Compromised | Detected    | Compromised |
| 1593 | A_23.P118854  | KRT37        | Hs.673852 | keratin 37                                                                                     | Homo sapiens keratin 37 (KRT37), mRNA [NM_003770]                                                                                           | 3.61294 | up | 1.38119 | up | 12.05978    | 3.45631    | 4.58338     | 2.92615    | Not Detected | Compromised | Compromised | Compromised |

|      |               |              |           |                                                              |                                                                                                                                                                                                                                  |         |    |         |    |             |             |             |             |             |             |             |             |
|------|---------------|--------------|-----------|--------------------------------------------------------------|----------------------------------------------------------------------------------------------------------------------------------------------------------------------------------------------------------------------------------|---------|----|---------|----|-------------|-------------|-------------|-------------|-------------|-------------|-------------|-------------|
| 1594 | A_33_P3282840 | RPS29        | Hs.156367 | ribosomal protein S29                                        | Homo sapiens ribosomal protein S29 (RPS29), transcript variant 2, mRNA [NM_001030001]                                                                                                                                            | 3.61072 | up | 3.92463 | up | 2364.17460  | 677.98315   | 1611.71170  | 362.12150   | Detected    | Detected    | Detected    | Detected    |
| 1595 | A_33_P3389376 | MDM4         | Hs.497492 | Mdm4 p53 binding protein homolog (mouse)                     | Homo sapiens Mdm4 p53 binding protein homolog (mouse) (MDM4), transcript variant 1, mRNA [NM_002393]                                                                                                                             | 3.60834 | up | 3.11786 | up | 139.39375   | 40.00084    | 116.69451   | 33.00345    | Detected    | Detected    | Detected    | Detected    |
| 1596 | A_24_P366787  | FLJ42875     | Hs.531041 | hypothetical LOC440556                                       | Homo sapiens hypothetical LOC440556 (FLJ42875), transcript variant 2, non-coding RNA [NR_024371]                                                                                                                                 | 3.60306 | up | 3.80597 | up | 141.65352   | 40.70885    | 175.66660   | 40.69949    | Detected    | Detected    | Detected    | Detected    |
| 1597 | A_32_P76853   |              | Hs.525905 |                                                              | Golgin subfamily A member 8-like protein 1 [Source:UniProtKB/Swiss-Prot;Acc:A6NCT78] [ENST00000450802]                                                                                                                           | 3.60159 | up | 3.89410 | up | 828.08330   | 238.07475   | 713.12400   | 161.48187   | Detected    | Detected    | Detected    | Detected    |
| 1598 | A_23_P50508   | PLA2G4C      | Hs.631562 | phospholipase A2_group IVC (cytosolic, calcium-independent)  | Homo sapiens phospholipase A2_group IVC (cytosolic, calcium-independent) (PLA2G4C), transcript variant 1, mRNA [NM_003706]                                                                                                       | 3.60115 | up | 3.12145 | up | 304.54370   | 87.56720    | 275.25370   | 77.75748    | Detected    | Detected    | Detected    | Detected    |
| 1599 | A_33_P3255290 | JAKMIP2      | Hs.184323 | janus kinase and microtubule interacting protein 2           | Homo sapiens janus kinase and microtubule interacting protein 2 (JAKMIP2), mRNA [NM_014790]                                                                                                                                      | 3.59998 | up | 4.20435 | up | 11.50306    | 3.30861     | 13.51270    | 2.83406     | Compromised | Compromised | Detected    | Compromised |
| 1600 | A_32_P149546  | CROCC        | Hs.309403 | ciliary rootlet coiled-coil, rootletin                       | Homo sapiens ciliary rootlet coiled-coil, rootletin (CROCC), mRNA [NM_014675]                                                                                                                                                    | 3.59752 | up | 3.00261 | up | 50.55953    | 14.55234    | 43.12153    | 12.66369    | Detected    | Compromised | Detected    | Compromised |
| 1601 | A_33_P3302518 | CCDC40       | Hs.202542 | coiled-coil domain containing 40                             | Homo sapiens coiled-coil domain containing 40 (CCDC40), mRNA [NM_017950]                                                                                                                                                         | 3.59598 | up | 2.38884 | up | 172.90828   | 49.78875    | 160.99239   | 59.42691    | Detected    | Detected    | Detected    | Detected    |
| 1602 | A_33_P3314643 | SPEF1        | Hs.72620  | sperm flagellar 1                                            | Homo sapiens sperm flagellar 1 (SPEF1), mRNA [NM_015417]                                                                                                                                                                         | 3.59452 | up | 3.20838 | up | 435.99808   | 125.59629   | 405.89447   | 111.55589   | Detected    | Detected    | Detected    | Detected    |
| 1603 | A_33_P3367447 | ALDH3B1      | Hs.523841 | aldehyde dehydrogenase 3 family, member B1                   | Homo sapiens aldehyde dehydrogenase 3 family, member B1 (ALDH3B1), transcript variant 3, mRNA [NM_001161473]                                                                                                                     | 3.59314 | up | 2.87858 | up | 1011.63520  | 291.53010   | 771.86926   | 236.44507   | Detected    | Detected    | Detected    | Detected    |
| 1604 | A_24_P88801   | NPHP1        | Hs.280388 | nephronophthisis 1 (juvenile)                                | Homo sapiens nephronophthisis 1 (juvenile) (NPHP1), transcript variant 1, mRNA [NM_000272]                                                                                                                                       | 3.59216 | up | 3.38714 | up | 1405.62020  | 405.17764   | 1274.20360  | 331.71980   | Detected    | Detected    | Detected    | Detected    |
| 1605 | A_23_P23947   | MAP3K8       | Hs.432453 | mitogen-activated protein kinase kinase kinase 8             | Homo sapiens mitogen-activated protein kinase kinase kinase 8 (MAP3K8), mRNA [NM_005204]                                                                                                                                         | 3.59159 | up | 3.82053 | up | 384.24410   | 110.77798   | 360.49335   | 83.20309    | Detected    | Detected    | Detected    | Detected    |
| 1606 | A_23_P42257   | IER3         | Hs.591785 | immediate early response 3                                   | Homo sapiens immediate early response 3 (IER3), mRNA [NM_003897]                                                                                                                                                                 | 3.59103 | up | 3.30767 | up | 67134.43000 | 19357.94000 | 53813.27300 | 14346.06700 | Detected    | Detected    | Detected    | Detected    |
| 1607 | A_23_P163258  | PARP6        | Hs.270244 | poly (ADP-ribose) polymerase family, member 6                | Homo sapiens poly (ADP-ribose) polymerase family, member 6 (PARP6), mRNA [NM_020214]                                                                                                                                             | 3.58963 | up | 3.39774 | up | 5390.45600  | 1554.92440  | 5197.07400  | 1348.76010  | Detected    | Detected    | Detected    | Detected    |
| 1608 | A_33_P3335077 | LOC100130840 | Hs.638946 | hypothetical LOC100130840                                    | PREDICTED: Homo sapiens hypothetical LOC100130840 (LOC100130840), mRNA [XM_001722076]                                                                                                                                            | 3.58931 | up | 3.90131 | up | 152.71529   | 44.05592    | 94.43475    | 21.34453    | Detected    | Detected    | Detected    | Detected    |
| 1609 | A_23_P35349   | SVIL         | Hs.499209 | supervillin                                                  | Homo sapiens supervillin (SVIL), transcript variant 2, mRNA [NM_021738]                                                                                                                                                          | 3.58849 | up | 3.44995 | up | 4242.21800  | 1224.09250  | 3465.01540  | 885.64080   | Detected    | Detected    | Detected    | Detected    |
| 1610 | A_24_P115700  | COX15        | Hs.28326  | COX15 homolog, cytochrome c oxidase assembly protein (yeast) | Homo sapiens COX15 homolog, cytochrome c oxidase assembly protein (yeast) (COX15), nuclear gene encoding mitochondrial protein, transcript variant 1, mRNA [NM_078470]                                                           | 3.58679 | up | 2.94805 | up | 145.35582   | 41.96235    | 99.63257    | 29.80107    | Detected    | Detected    | Detected    | Detected    |
| 1611 | A_33_P3216898 | LOC286367    | Hs.720355 | FP944                                                        | Homo sapiens FP944 (LOC286367), non-coding RNA [NR_024011]                                                                                                                                                                       | 3.58517 | up | 4.01068 | up | 305.39200   | 88.20250    | 214.72481   | 47.20954    | Detected    | Detected    | Detected    | Detected    |
| 1612 | A_33_P3355252 |              |           |                                                              | Novel proteinPutative uncharacterized protein ENSP00000368839 : [Source:UniProtKB/TrEMBL;Acc:Q5VX X5] [ENST00000379524]                                                                                                          | 3.58489 | up | 4.31669 | up | 108.92868   | 31.46297    | 132.45271   | 27.05674    | Detected    | Detected    | Detected    | Detected    |
| 1613 | A_33_P3344504 |              | Hs.618112 |                                                              | Amyloid beta A4 precursor protein-binding family A member 2 (Neuron-specific X11L protein)(Neuronal Munc18-1-interacting protein 2)(Mint-2)(Adapter protein X11 beta) [Source:UniProtKB/Swiss-Prot;Acc:Q99767] [ENST00000382938] | 3.58220 | up | 2.82836 | up | 33.92819    | 9.80719     | 8.54840     | 2.66511     | Detected    | Compromised | Compromised | Compromised |
| 1614 | A_33_P3390172 | ADAMDEC1     | Hs.521459 | ADAM-like, decysin 1                                         | Homo sapiens ADAM-like, decysin 1 (ADAMDEC1), transcript variant 2, mRNA [NM_001145271]                                                                                                                                          | 3.58198 | up | 7.35125 | up | 12.73327    | 3.68086     | 25.90791    | 3.10768     | Compromised | Compromised | Detected    | Compromised |
| 1615 | A_33_P3398727 |              | Hs.650636 |                                                              | AGENCOURT_7904926 NIH_MGC_82 Homo sapiens cDNA clone IMAGE:6105930 5', mRNA sequence [BQ441254]                                                                                                                                  | 3.57776 | up | 3.21129 | up | 57.06456    | 16.51537    | 33.11118    | 9.09201     | Detected    | Detected    | Detected    | Compromised |
| 1616 | A_23_P168551  | SLC29A4      | Hs.4302   | solute carrier family 29 (nucleoside transporters), member 4 | Homo sapiens solute carrier family 29 (nucleoside transporters), member 4 (SLC29A4), transcript variant 1, mRNA [NM_001040681]                                                                                                   | 3.57508 | up | 4.74021 | up | 120.09771   | 34.78423    | 130.02846   | 24.18835    | Detected    | Detected    | Detected    | Detected    |
| 1617 | A_23_P119196  | KLF2         | Hs.107740 | Kruppel-like factor 2 (lung)                                 | Homo sapiens Kruppel-like factor 2 (lung) (KLF2), mRNA [NM_016270]                                                                                                                                                               | 3.57506 | up | 3.46525 | up | 6568.12060  | 1902.35140  | 5248.78960  | 1335.64230  | Detected    | Detected    | Detected    | Detected    |
| 1618 | A_23_P4190    | ACSF2        | Hs.288959 | acyl-CoA synthetase family member 2                          | Homo sapiens acyl-CoA synthetase family member 2 (ACSF2), mRNA [NM_025149]                                                                                                                                                       | 3.57065 | up | 3.52768 | up | 864.44560   | 250.68234   | 731.38354   | 182.81906   | Detected    | Detected    | Detected    | Detected    |
| 1619 | A_23_P209564  | CYBRD1       | Hs.221941 | cytochrome b reductase 1                                     | Homo sapiens cytochrome b reductase 1 (CYBRD1), transcript variant 1, mRNA [NM_024843]                                                                                                                                           | 3.56845 | up | 3.12987 | up | 22160.46300 | 6430.32000  | 24767.81600 | 6977.93850  | Detected    | Detected    | Detected    | Detected    |
| 1620 | A_33_P3258581 | LOC389791    | Hs.632678 | hypothetical LOC389791                                       | Homo sapiens hypothetical LOC389791 (LOC389791), non-coding RNA [NR_024425]                                                                                                                                                      | 3.56718 | up | 3.44778 | up | 173.79689   | 50.44876    | 139.96048   | 35.79572    | Detected    | Detected    | Detected    | Detected    |

|      |               |              |           |                                                                   |                                                                                                                      |         |    |         |    |             |            |             |            |             |             |             |             |
|------|---------------|--------------|-----------|-------------------------------------------------------------------|----------------------------------------------------------------------------------------------------------------------|---------|----|---------|----|-------------|------------|-------------|------------|-------------|-------------|-------------|-------------|
| 1621 | A_23_P417942  | FNBP1L       | Hs.134060 | formin binding protein 1-like                                     | Homo sapiens formin binding protein 1-like (FNBP1L), transcript variant 1, mRNA [NM_001024948]                       | 3.56612 | up | 3.92056 | up | 2283.83960  | 663.13574  | 1493.06930  | 335.81310  | Detected    | Detected    | Detected    | Detected    |
| 1622 | A_33_P3398111 |              | Hs.120392 |                                                                   | Putative uncharacterized protein C16orf85 [Source:UniProtKB/Swiss-Prot;Acc:Q6ZSH3] [ENST00000379416]                 | 3.56530 | up | 6.00368 | up | 40.53354    | 11.77204   | 40.46209    | 5.94287    | Detected    | Compromised | Detected    | Compromised |
| 1623 | A_33_P3345643 | ZDHH11B      |           | zinc finger, DHHC-type containing 11B                             | PREDICTED: Homo sapiens zinc finger, DHHC-type containing 11B (ZDHH11B), mRNA [XM_001716434]                         | 3.56511 | up | 3.11255 | up | 331.82440   | 96.37583   | 241.80437   | 68.50353   | Detected    | Detected    | Detected    | Detected    |
| 1624 | A_33_P3240144 |              |           |                                                                   |                                                                                                                      | 3.56408 | up | 3.46930 | up | 97.15759    | 28.22687   | 91.06741    | 23.14658   | Detected    | Detected    | Detected    | Detected    |
| 1625 | A_33_P3342111 | ZNF169       | Hs.387623 | zinc finger protein 169                                           | Homo sapiens zinc finger protein 169 (ZNF169), mRNA [NM_194320]                                                      | 3.56200 | up | 3.04901 | up | 440.11954   | 127.94099  | 306.36032   | 88.60101   | Detected    | Detected    | Detected    | Detected    |
| 1626 | A_23_P125253  | LDB2         | Hs.714330 | LIM domain binding 2                                              | Homo sapiens LIM domain binding 2 (LDB2), transcript variant 1, mRNA [NM_001290]                                     | 3.55983 | up | 3.54417 | up | 75.30250    | 21.90350   | 74.57307    | 18.55379   | Detected    | Detected    | Detected    | Compromised |
| 1627 | A_23_P200298  | AGL          | Hs.904    | amylase-1, 6-glucosidase, 4-alpha-glucanotransferase              | Homo sapiens amylase-1, 6-glucosidase, 4-alpha-glucanotransferase (AGL), transcript variant 4, mRNA [NM_000028]      | 3.55967 | up | 3.27552 | up | 1425.77870  | 414.73935  | 967.82410   | 260.54430  | Detected    | Detected    | Detected    | Detected    |
| 1628 | A_23_P143374  | NINL         | Hs.631508 | ninein-like                                                       | Homo sapiens ninein-like (NINL), mRNA [NM_025176]                                                                    | 3.55930 | up | 3.31997 | up | 2125.77170  | 618.42230  | 1310.51390  | 348.07526  | Detected    | Detected    | Detected    | Detected    |
| 1629 | A_23_P153867  | LASS4        | Hs.515111 | LAG1 homolog, ceramide synthase 4                                 | Homo sapiens LAG1 homolog, ceramide synthase 4 (LASS4), mRNA [NM_024552]                                             | 3.55828 | up | 4.89378 | up | 62.79794    | 18.27421   | 63.07991    | 11.36612   | Detected    | Detected    | Detected    | Compromised |
| 1630 | A_23_P316150  | IFT80        | Hs.478095 | intraflagellar transport 80 homolog (Chlamydomonas)               | Homo sapiens intraflagellar transport 80 homolog (Chlamydomonas) (IFT80), mRNA [NM_020800]                           | 3.55800 | up | 3.22053 | up | 1245.15640  | 362.36908  | 1048.37870  | 287.04944  | Detected    | Detected    | Detected    | Detected    |
| 1631 | A_23_P67453   | TNNI3        | Hs.709179 | troponin I type 3 (cardiac)                                       | Homo sapiens troponin I type 3 (cardiac) (TNNI3), mRNA [NM_000363]                                                   | 3.55771 | up | 8.10103 | up | 64.91136    | 18.89221   | 96.89681    | 10.54714   | Detected    | Detected    | Detected    | Compromised |
| 1632 | A_23_P147397  | DYNC2H1      | Hs.503721 | dynein, cytoplasmic 2, heavy chain 1                              | Homo sapiens dynein, cytoplasmic 2, heavy chain 1 (DYNC2H1), mRNA [NM_001080463]                                     | 3.55719 | up | 3.51423 | up | 2354.29660  | 685.30970  | 1913.72940  | 480.19305  | Detected    | Detected    | Detected    | Detected    |
| 1633 | A_33_P3296119 | C13orf38     | Hs.720832 | chromosome 13 open reading frame 38                               | Homo sapiens chromosome 13 open reading frame 38 (C13orf38), transcript variant 1, mRNA [NM_001144981]               | 3.55138 | up | 3.39422 | up | 115.73061   | 33.74306   | 117.21819   | 30.45235   | Detected    | Detected    | Detected    | Detected    |
| 1634 | A_24_P9346    | SYNGAP1      | Hs.586264 | synaptic Ras GTPase activating protein 1 homolog (rat)            | Homo sapiens synaptic Ras GTPase activating protein 1 homolog (rat) (SYNGAP1), mRNA [NM_006772]                      | 3.54982 | up | 1.50162 | up | 17.86921    | 5.21233    | 22.19660    | 13.03442   | Detected    | Compromised | Detected    | Compromised |
| 1635 | A_33_P3229512 | LOC100130387 | Hs.720681 | similar to hCG2042422                                             | PREDICTED: Homo sapiens similar to hCG2042422 (LOC100130387), mRNA [XM_001715803]                                    | 3.54847 | up | 3.14560 | up | 100.52268   | 29.33296   | 103.04519   | 28.88612   | Detected    | Detected    | Detected    | Detected    |
| 1636 | A_33_P3356392 | RGL3         | Hs.720291 | ral guanine nucleotide dissociation stimulator-like 3             | Homo sapiens ral guanine nucleotide dissociation stimulator-like 3 (RGL3), transcript variant 1, mRNA [NM_001161616] | 3.54837 | up | 6.28886 | up | 13.58671    | 3.96477    | 19.03892    | 2.66954    | Detected    | Compromised | Detected    | Compromised |
| 1637 | A_33_P3296220 |              |           |                                                                   |                                                                                                                      | 3.54748 | up | 4.32383 | up | 10.82510    | 3.15969    | 12.95025    | 2.64104    | Compromised | Compromised | Detected    | Compromised |
| 1638 | A_24_P171873  | FBXO4        | Hs.165575 | F-box protein 4                                                   | Homo sapiens F-box protein 4 (FBXO4), transcript variant 1, mRNA [NM_012176]                                         | 3.54690 | up | 3.94588 | up | 1860.97770  | 543.28253  | 1464.78850  | 327.33840  | Detected    | Detected    | Detected    | Detected    |
| 1639 | A_33_P3394710 | SLC35A1      | Hs.423163 | solute carrier family 35 (CMP-sialic acid transporter), member A1 | Homo sapiens solute carrier family 35 (CMP-sialic acid transporter), member A1 (SLC35A1), mRNA [NM_006416]           | 3.54588 | up | 3.41519 | up | 409.90256   | 119.69861  | 561.53460   | 144.98631  | Detected    | Detected    | Detected    | Detected    |
| 1640 | A_33_P3290403 | IMPA2        | Hs.720058 | inositol(myo)-1(or 4)-monophosphatase 2                           | Homo sapiens inositol(myo)-1(or 4)-monophosphatase 2 (IMPA2), mRNA [NM_014214]                                       | 3.54584 | up | 3.26568 | up | 646.22410   | 188.71120  | 462.48260   | 124.87829  | Detected    | Detected    | Detected    | Detected    |
| 1641 | A_33_P3369920 | LOC100128402 | Hs.689574 | hypothetical protein LOC100128402                                 | Homo sapiens cDNA FLJ42583 fis, clone BRACE3009090. [AK124574]                                                       | 3.54424 | up | 3.22057 | up | 21.31879    | 6.22834    | 9.91581     | 2.71495    | Detected    | Compromised | Compromised | Compromised |
| 1642 | A_33_P3227231 |              |           |                                                                   | cDNA FLJ61016 [Source:UniProtKB/TrEMBL;Acc:BAE0R4] [ENST00000418158]                                                 | 3.54086 | up | 3.71779 | up | 51.36776    | 15.02155   | 12.51492    | 2.96831    | Detected    | Compromised | Compromised | Compromised |
| 1643 | A_24_P612446  | C6orf89      | Hs.433381 | chromosome 6 open reading frame 89                                | Homo sapiens chromosome 6 open reading frame 89 (C6orf89), mRNA [NM_152734]                                          | 3.53918 | up | 3.30985 | up | 1758.58120  | 514.50934  | 1263.04260  | 336.49265  | Detected    | Detected    | Detected    | Detected    |
| 1644 | A_23_P129157  | NEIL1        | Hs.512732 | nei endonuclease VIII-like 1 (E. coli)                            | Homo sapiens nei endonuclease VIII-like 1 (E. coli) (NEIL1), mRNA [NM_024608]                                        | 3.53743 | up | 3.37163 | up | 465.97850   | 136.39890  | 552.45330   | 144.48430  | Detected    | Detected    | Detected    | Detected    |
| 1645 | A_33_P3377130 | MAP3K5       | Hs.186486 | mitogen-activated protein kinase kinase kinase 5                  | Homo sapiens mitogen-activated protein kinase kinase kinase 5 (MAP3K5), mRNA [NM_005923]                             | 3.53708 | up | 3.67891 | up | 849.81820   | 248.77913  | 638.20070   | 152.96898  | Detected    | Detected    | Detected    | Detected    |
| 1646 | A_23_P170186  | OPLAH        | Hs.305882 | 5-oxoprolinase (ATP-hydrolysing)                                  | Homo sapiens 5-oxoprolinase (ATP-hydrolysing) (OPLAH), mRNA [NM_017570]                                              | 3.53418 | up | 3.09577 | up | 1979.40030  | 579.93390  | 1974.36650  | 562.37270  | Detected    | Detected    | Detected    | Detected    |
| 1647 | A_24_P191417  | NAB1         | Hs.107474 | NGFI-A binding protein 1 (EGR1 binding protein 1)                 | Homo sapiens NGFI-A binding protein 1 (EGR1 binding protein 1) (NAB1), mRNA [NM_005966]                              | 3.53207 | up | 3.70580 | up | 2311.19800  | 677.54900  | 1538.06290  | 365.98004  | Detected    | Detected    | Detected    | Detected    |
| 1648 | A_32_P846696  | LOC349196    | Hs.722381 | hypothetical LOC349196                                            | Homo sapiens hypothetical LOC349196 (LOC349196), non-coding RNA [NR_027000]                                          | 3.53042 | up | 3.35395 | up | 577.95800   | 169.51305  | 376.68848   | 99.03562   | Detected    | Detected    | Detected    | Detected    |
| 1649 | A_33_P3269924 |              |           |                                                                   |                                                                                                                      | 3.52969 | up | 2.74722 | up | 129.37459   | 37.95295   | 110.42434   | 35.44351   | Detected    | Detected    | Detected    | Detected    |
| 1650 | A_23_P434890  | CARD10       | Hs.57973  | caspase recruitment domain family, member 10                      | Homo sapiens caspase recruitment domain family, member 10 (CARD10), mRNA [NM_014550]                                 | 3.52860 | up | 3.28053 | up | 10937.75800 | 3209.66020 | 11371.94400 | 3056.72530 | Detected    | Detected    | Detected    | Detected    |
| 1651 | A_24_P160413  | MTMR9L       | Hs.471067 | myotubularin related protein 9-like                               | Homo sapiens myotubularin related protein 9-like (MTMR9L), non-coding RNA [NR_026850]                                | 3.52709 | up | 3.63214 | up | 533.08640   | 156.50012  | 389.90180   | 94.65812   | Detected    | Detected    | Detected    | Detected    |
| 1652 | A_33_P3423551 | IER3         | Hs.591785 | immediate early response 3                                        | Homo sapiens immediate early response 3 (IER3), mRNA [NM_003897]                                                     | 3.51849 | up | 3.29986 | up | 23844.66600 | 7017.26600 | 27244.95900 | 7280.40700 | Detected    | Detected    | Detected    | Detected    |

|      |               |           |           |                                                                                |                                                                                                                                              |         |    |         |    |             |            |             |            |             |             |             |             |
|------|---------------|-----------|-----------|--------------------------------------------------------------------------------|----------------------------------------------------------------------------------------------------------------------------------------------|---------|----|---------|----|-------------|------------|-------------|------------|-------------|-------------|-------------|-------------|
| 1653 | A_23_P346912  | SPATA17   | Hs.171130 | spermatogenesis associated 17                                                  | Homo sapiens spermatogenesis associated 17 (SPATA17), mRNA [NM_138796]                                                                       | 3.51794 | up | 3.79146 | up | 81.48010    | 23.98258   | 70.66014    | 16.43363   | Detected    | Detected    | Detected    | Detected    |
| 1654 | A_32_P156373  |           | Hs.666632 |                                                                                | DA110513 BRACE3 Homo sapiens cDNA clone BRACE3027555 5', mRNA sequence [DA110513]                                                            | 3.51633 | up | 1.51763 | up | 86.19940    | 25.38326   | 43.79826    | 25.44821   | Detected    | Detected    | Detected    | Detected    |
| 1655 | A_23_P59616   | GTF2IRD2  | Hs.647017 | GTF2I repeat domain containing 2                                               | Homo sapiens GTF2I repeat domain containing 2 (GTF2IRD2), mRNA [NM_173537]                                                                   | 3.51555 | up | 3.35763 | up | 280.25424   | 82.54521   | 318.89220   | 83.74839   | Detected    | Detected    | Detected    | Detected    |
| 1656 | A_23_P66038   | ZDHHC1    | Hs.658333 | zinc finger, DHHC-type containing 1                                            | Homo sapiens zinc finger, DHHC-type containing 1 (ZDHHC1), mRNA [NM_013304]                                                                  | 3.51459 | up | 3.37710 | up | 325.30707   | 95.84110   | 324.18497   | 84.64754   | Detected    | Detected    | Detected    | Detected    |
| 1657 | A_33_P3252499 | WDR52     | Hs.584936 | WD repeat domain 52                                                            | Homo sapiens WD repeat domain 52 (WDR52), transcript variant 1, mRNA [NM_001164496]                                                          | 3.51396 | up | 1.41660 | up | 17.42707    | 5.13524    | 8.96346     | 5.57949    | Detected    | Compromised | Compromised | Compromised |
| 1658 | A_33_P3302185 | HS3ST6    | Hs.670144 | heparan sulfate (glucosamine) 3-O-sulfotransferase 6                           | Homo sapiens heparan sulfate (glucosamine) 3-O-sulfotransferase 6 (HS3ST6), mRNA [NM_001009606]                                              | 3.50833 | up | 3.23090 | up | 10.91772    | 3.22229    | 13.30177    | 3.63038    | Compromised | Compromised | Detected    | Compromised |
| 1659 | A_33_P3305487 | REM2      | Hs.444911 | RAS (RAD and GEM)-like GTP binding 2                                           | Homo sapiens RAS (RAD and GEM)-like GTP binding 2 (REM2), mRNA [NM_173527]                                                                   | 3.50817 | up | 3.55839 | up | 518.81020   | 153.13045  | 456.49930   | 113.12332  | Detected    | Detected    | Detected    | Detected    |
| 1660 | A_32_P41026   | SC5DL     | Hs.287749 | sterol-C5-desaturase (ERG3 delta-5-desaturase homolog, S. cerevisiae)-like     | Homo sapiens sterol-C5-desaturase (ERG3 delta-5-desaturase homolog, S. cerevisiae)-like (SC5DL), transcript variant 2, mRNA [NM_001024956]   | 3.50639 | up | 6.05258 | up | 66.26868    | 19.56955   | 116.33959   | 16.94933   | Detected    | Detected    | Detected    | Detected    |
| 1661 | A_24_P396720  | PPP1CB    | Hs.702907 | protein phosphatase 1, catalytic subunit, beta isoform                         | Homo sapiens protein phosphatase 1, catalytic subunit, beta isoform (PPP1CB), transcript variant 1, mRNA [NM_002709]                         | 3.50570 | up | 3.30802 | up | 14584.61800 | 4307.78100 | 13471.40100 | 3590.95560 | Detected    | Detected    | Detected    | Detected    |
| 1662 | A_23_P48029   | CLEC4A    | Hs.504657 | C-type lectin domain family 4, member A                                        | Homo sapiens C-type lectin domain family 4, member A (CLEC4A), transcript variant 1, mRNA [NM_016184]                                        | 3.49800 | up | 3.80101 | up | 261.87177   | 77.51788   | 182.94298   | 42.44064   | Detected    | Detected    | Detected    | Detected    |
| 1663 | A_23_P35343   | ZNF248    | Hs.528423 | zinc finger protein 248                                                        | Homo sapiens zinc finger protein 248 (ZNF248), mRNA [NM_021045]                                                                              | 3.49670 | up | 3.48105 | up | 244.93214   | 72.53056   | 176.16220   | 44.62397   | Detected    | Detected    | Detected    | Detected    |
| 1664 | A_23_P254688  | TMEM108   | Hs.191616 | transmembrane protein 108                                                      | Homo sapiens transmembrane protein 108 (TMEM108), transcript variant 1, mRNA [NM_023943]                                                     | 3.49493 | up | 2.28341 | up | 16.29843    | 4.82882    | 7.60343     | 2.93624    | Detected    | Compromised | Compromised | Compromised |
| 1665 | A_33_P3422240 | KIAA1530  | Hs.380475 | KIAA1530                                                                       | Homo sapiens KIAA1530 (KIAA1530), mRNA [NM_020894]                                                                                           | 3.49083 | up | 1.94352 | up | 60.49444    | 17.94405   | 52.01551    | 23.59981   | Detected    | Compromised | Detected    | Detected    |
| 1666 | A_33_P3354374 |           |           |                                                                                | Putative uncharacterized protein ENSP00000380701 [Source:UniProtKB/Swiss-Prot;Acc:ABMTB1] [ENST00000397571]                                  | 3.48928 | up | 6.82353 | up | 104.87907   | 31.12331   | 76.15112    | 9.84085    | Detected    | Detected    | Detected    | Compromised |
| 1667 | A_33_P3215611 |           |           |                                                                                |                                                                                                                                              | 3.48912 | up | 2.51871 | up | 231.80783   | 68.73375   | 23.10415    | 8.08869    | Detected    | Detected    | Detected    | Compromised |
| 1668 | A_23_P123454  | NUDT18    | Hs.721833 | nudix (nucleoside diphosphate linked moiety X)-type motif 18                   | Homo sapiens nudix (nucleoside diphosphate linked moiety X)-type motif 18 (NUDT18), mRNA [NM_024815]                                         | 3.48853 | up | 3.43320 | up | 1228.29110  | 364.57907  | 1351.67600  | 347.16757  | Detected    | Detected    | Detected    | Detected    |
| 1669 | A_33_P3243093 | RGS5      | Hs.24950  | regulator of G-protein signaling 5                                             | Homo sapiens regulator of G-protein signaling 5 (RGS5), mRNA [NM_003617]                                                                     | 3.48742 | up | 3.84304 | up | 164.69100   | 48.89890   | 119.81332   | 27.49131   | Detected    | Detected    | Detected    | Detected    |
| 1670 | A_33_P3314813 | C11orf94  | Hs.193741 | chromosome 11 open reading frame 94                                            | Homo sapiens chromosome 11 open reading frame 94 (C11orf94), mRNA [NM_001080446]                                                             | 3.48578 | up | 3.24945 | up | 71.51778    | 21.24453   | 59.79224    | 16.22558   | Detected    | Detected    | Detected    | Detected    |
| 1671 | A_23_P201939  | PPM1J     | Hs.655231 | protein phosphatase 1J (PP2C domain containing)                                | Homo sapiens protein phosphatase 1J (PP2C domain containing) (PPM1J), mRNA [NM_005167]                                                       | 3.48513 | up | 3.43103 | up | 578.89020   | 171.99289  | 745.83720   | 191.68364  | Detected    | Detected    | Detected    | Detected    |
| 1672 | A_33_P3316456 | NPL       | Hs.496969 | N-acetylneuraminase pyruvate lyase (dihydrodipicolinate synthase)              | Homo sapiens N-acetylneuraminase pyruvate lyase (dihydrodipicolinate synthase) (NPL), mRNA [NM_030769]                                       | 3.48494 | up | 4.76134 | up | 66.36359    | 19.71821   | 54.51500    | 10.09606   | Detected    | Detected    | Detected    | Compromised |
| 1673 | A_23_P134542  | FOXP2     | Hs.656280 | forkhead box P2                                                                | Homo sapiens forkhead box P2 (FOXP2), transcript variant 2, mRNA [NM_148896]                                                                 | 3.48230 | up | 4.66033 | up | 34.95438    | 10.39367   | 19.81325    | 3.74891    | Detected    | Compromised | Detected    | Compromised |
| 1674 | A_32_P118250  | C14orf167 |           | chromosome 14 open reading frame 167                                           | Homo sapiens chromosome 14 open reading frame 167 (C14orf167), transcript variant 1, non-coding RNA [NR_023921]                              | 3.47629 | up | 3.61179 | up | 673.70056   | 200.67060  | 459.84750   | 112.26830  | Detected    | Detected    | Detected    | Detected    |
| 1675 | A_33_P3329149 | CDC2L5    | Hs.233552 | cell division cycle 2-like 5 (cholinesterase-related cell division controller) | Homo sapiens cell division cycle 2-like 5 (cholinesterase-related cell division controller) (CDC2L5), transcript variant 2, mRNA [NM_031267] | 3.47153 | up | 2.27811 | up | 305.51297   | 91.12592   | 131.37502   | 50.85149   | Detected    | Detected    | Detected    | Detected    |
| 1676 | A_33_P3399571 | VNN1      | Hs.12114  | vanin 1                                                                        | Homo sapiens vanin 1 (VNN1), mRNA [NM_004966]                                                                                                | 3.46848 | up | 3.04297 | up | 96.48717    | 28.80472   | 64.80814    | 18.78009   | Detected    | Detected    | Detected    | Detected    |
| 1677 | A_33_P3237775 | NR1H3     | Hs.438863 | nuclear receptor subfamily 1, group H, member 3                                | Homo sapiens nuclear receptor subfamily 1, group H, member 3 (NR1H3), transcript variant 1, mRNA [NM_005693]                                 | 3.46450 | up | 3.43277 | up | 2694.90920  | 805.44730  | 2761.34810  | 709.31964  | Detected    | Detected    | Detected    | Detected    |
| 1678 | A_33_P3218951 | RPA1      | Hs.461925 | replication protein A1, 70kDa                                                  | Homo sapiens replication protein A1, 70kDa (RPA1), mRNA [NM_002945]                                                                          | 3.46163 | up | 3.73125 | up | 378.90866   | 113.34091  | 339.45755   | 80.22252   | Detected    | Detected    | Detected    | Detected    |
| 1679 | A_23_P62588   | CALML6    | Hs.85902  | calmodulin-like 6                                                              | Homo sapiens calmodulin-like 6 (CALML6), mRNA [NM_138705]                                                                                    | 3.46162 | up | 2.91189 | up | 47.31645    | 14.15356   | 37.23115    | 11.27448   | Detected    | Compromised | Detected    | Compromised |
| 1680 | A_33_P3419865 | LOC646719 | Hs.697792 | hypothetical LOC646719                                                         | PREDICTED: Homo sapiens hypothetical LOC646719 (LOC646719), miscRNA [XR_041071]                                                              | 3.46143 | up | 1.94651 | up | 81.24563    | 24.30400   | 39.03117    | 17.68151   | Detected    | Detected    | Detected    | Detected    |
| 1681 | A_33_P3887081 | LOC338817 | Hs.524257 | hypothetical protein LOC338817                                                 | Homo sapiens hypothetical protein LOC338817, mRNA (cDNA clone IMAGE:5267955) [BC041827]                                                      | 3.46029 | up | 3.20898 | up | 54.44406    | 16.29188   | 29.77458    | 8.18172    | Detected    | Compromised | Detected    | Compromised |
| 1682 | A_23_P30976   | GRM1      | Hs.32945  | glutamate receptor, metabotropic 1                                             | Homo sapiens glutamate receptor, metabotropic 1 (GRM1), transcript variant 1, mRNA [NM_000838]                                               | 3.46025 | up | 3.36211 | up | 22.09716    | 6.61245    | 12.97252    | 3.40234    | Detected    | Compromised | Compromised | Compromised |



|      |               |              |           |                                                                     |                                                                                                                         |         |    |         |    |             |            |             |            |             |             |             |             |
|------|---------------|--------------|-----------|---------------------------------------------------------------------|-------------------------------------------------------------------------------------------------------------------------|---------|----|---------|----|-------------|------------|-------------|------------|-------------|-------------|-------------|-------------|
| 1683 | A_33_P3242014 | PHC1         | Hs.305985 | polyhomeotic homolog 1 (Drosophila)                                 | Homo sapiens polyhomeotic homolog 1 (Drosophila) (PHC1). mRNA [NM_004426]                                               | 3.45983 | up | 3.55190 | up | 2592.50800  | 775.88760  | 1949.52170  | 483.98657  | Detected    | Detected    | Detected    | Detected    |
| 1684 | A_23_P398172  | FAM135A      | Hs.211700 | family with sequence similarity 135, member A                       | Homo sapiens family with sequence similarity 135, member A (FAM135A), transcript variant 2, mRNA [NM_020818]            | 3.45667 | up | 4.17388 | up | 504.74140   | 151.19731  | 308.59796   | 65.19569   | Detected    | Detected    | Detected    | Detected    |
| 1685 | A_33_P3301980 | LOC100132625 | Hs.711757 | hypothetical LOC100132625                                           | PREDICTED: Homo sapiens hypothetical LOC100132625 (LOC100132625), mRNA [XM_001720431]                                   | 3.45553 | up | 1.95668 | up | 13.16082    | 3.94368    | 6.58631     | 2.96817    | Detected    | Compromised | Compromised | Compromised |
| 1686 | A_23_P67569   | LPPR3        | Hs.546439 | lipid phosphate phosphatase-related protein type 3                  | Homo sapiens lipid phosphate phosphatase-related protein type 3 (LPPR3), mRNA [NM_024888]                               | 3.45144 | up | 4.53070 | up | 75.44769    | 22.63489   | 127.61361   | 24.83690   | Detected    | Detected    | Detected    | Detected    |
| 1687 | A_33_P3239242 | SPATA6       | Hs.538103 | spermatogenesis associated 6                                        | Homo sapiens spermatogenesis associated 6 (SPATA6), mRNA [NM_019073]                                                    | 3.44937 | up | 3.91859 | up | 153.80193   | 46.16944   | 115.49961   | 25.99058   | Detected    | Detected    | Detected    | Detected    |
| 1688 | A_32_P66364   | PPP1R1C      | Hs.10941  | protein phosphatase 1, regulatory (inhibitor) subunit 1C            | Homo sapiens protein phosphatase 1, regulatory (inhibitor) subunit 1C (PPP1R1C), mRNA [NM_01080545]                     | 3.44406 | up | 3.65198 | up | 369.87850   | 111.20429  | 313.43857   | 75.68146   | Detected    | Detected    | Detected    | Detected    |
| 1689 | A_23_P73809   | LRCH2        | Hs.65366  | leucine-rich repeats and calponin homology (CH) domain containing 2 | Homo sapiens leucine-rich repeats and calponin homology (CH) domain containing 2 (LRCH2), mRNA [NM_020871]              | 3.44277 | up | 3.28187 | up | 299.69025   | 90.13582   | 299.90585   | 80.58026   | Detected    | Detected    | Detected    | Detected    |
| 1690 | A_24_P521994  | KLHL24       | Hs.407709 | kelch-like 24 (Drosophila)                                          | Homo sapiens kelch-like 24 (Drosophila) (KLHL24), mRNA [NM_017644]                                                      | 3.43452 | up | 3.56704 | up | 1701.70040  | 513.03810  | 1084.29200  | 268.04242  | Detected    | Detected    | Detected    | Detected    |
| 1691 | A_33_P3317460 | LOC100130141 | Hs.722967 | hypothetical LOC100130141                                           | PREDICTED: Homo sapiens similar to Kruppel-like factor (LOC100130141), miscRNA [XR_037929]                              | 3.43361 | up | 3.17538 | up | 1069.53860  | 322.53674  | 413.09738   | 114.71539  | Detected    | Detected    | Detected    | Detected    |
| 1692 | A_23_P163402  | CYP1A1       | Hs.72912  | cytochrome P450, family 1, subfamily A, polypeptide 1               | Homo sapiens cytochrome P450, family 1, subfamily A, polypeptide 1 (CYP1A1), mRNA [NM_000499]                           | 3.42941 | up | 2.63223 | up | 103.43832   | 31.23194   | 105.67860   | 35.40213   | Detected    | Detected    | Detected    | Detected    |
| 1693 | A_33_P3261520 | FLJ41309     | Hs.364045 | hypothetical protein LOC645079                                      | Homo sapiens cDNA FLJ41309 fis, clone BRAMY2042641, [AK123303]                                                          | 3.42917 | up | 6.88871 | up | 76.15928    | 22.99678   | 47.47089    | 6.07652    | Detected    | Detected    | Detected    | Compromised |
| 1694 | A_23_P90359   | NRTN         | Hs.234775 | neurturin                                                           | Homo sapiens neurturin (NRTN), mRNA [NM_004558]                                                                         | 3.42729 | up | 5.61734 | up | 49.59145    | 14.98267   | 104.18828   | 16.35512   | Detected    | Compromised | Detected    | Detected    |
| 1695 | A_33_P3350580 |              |           |                                                                     | Protein kinase C delta type (EC 2.7.11.13)(nPKC-delta) [Source:UniProtKB/Swiss-Prot;Acc:Q05655] [ENST00000394727]       | 3.42528 | up | 1.51866 | up | 32.04597    | 9.68748    | 10.09262    | 5.86017    | Detected    | Compromised | Compromised | Compromised |
| 1696 | A_33_P3212640 | NOTCH2NL     | Hs.709526 | Notch homolog 2 (Drosophila) N-terminal like                        | Homo sapiens Notch homolog 2 (Drosophila) N-terminal like (NOTCH2NL), mRNA [NM_203458]                                  | 3.42504 | up | 2.50405 | up | 217.71080   | 65.81836   | 154.98172   | 54.57623   | Detected    | Detected    | Detected    | Detected    |
| 1697 | A_23_P147255  | PCBP3        | Hs.474049 | poly(rC) binding protein 3                                          | Homo sapiens poly(rC) binding protein 3 (PCBP3), transcript variant 1, mRNA [NM_020528]                                 | 3.42335 | up | 3.13726 | up | 401.60260   | 121.47260  | 349.18950   | 98.14671   | Detected    | Detected    | Detected    | Detected    |
| 1698 | A_24_P16124   | IFITM4P      |           | interferon induced transmembrane protein 4 pseudogene               | Homo sapiens interferon induced transmembrane protein 4 pseudogene (IFITM4P), non-coding RNA [NR_001590]                | 3.42221 | up | 3.48262 | up | 19027.96500 | 5757.29600 | 17262.69100 | 4370.86570 | Detected    | Detected    | Detected    | Detected    |
| 1699 | A_23_P381017  | WBSR27       | Hs.647042 | Williams Beuren syndrome chromosome region 27                       | Homo sapiens Williams Beuren syndrome chromosome region 27 (WBSR27), mRNA [NM_152559]                                   | 3.42096 | up | 3.10278 | up | 114.25768   | 34.58360   | 152.67113   | 43.38819   | Detected    | Detected    | Detected    | Detected    |
| 1700 | A_32_P106933  | BCAR4        | Hs.24611  | breast cancer anti-estrogen resistance 4                            | Homo sapiens breast cancer anti-estrogen resistance 4 (BCAR4), non-coding RNA [NR_024049]                               | 3.41651 | up | 1.47511 | up | 30.29793    | 9.18255    | 22.96960    | 13.73075   | Detected    | Compromised | Detected    | Compromised |
| 1701 | A_33_P3385266 | ABCC6        | Hs.442182 | ATP-binding cassette, sub-family C (CFTR/MRP), member 6             | Homo sapiens ATP-binding cassette, sub-family C (CFTR/MRP), member 6 (ABCC6), transcript variant 2, mRNA [NM_001079528] | 3.41307 | up | 4.36598 | up | 214.72296   | 65.14271   | 185.94418   | 37.55487   | Detected    | Detected    | Detected    | Detected    |
| 1702 | A_33_P3275943 | PWWP2A       | Hs.438851 | PWWP domain containing 2A                                           | Homo sapiens PWWP domain containing 2A (PWWP2A), transcript variant 1, mRNA [NM_052927]                                 | 3.41295 | up | 1.26572 | up | 10.79449    | 3.27496    | 14.68760    | 10.23242   | Compromised | Compromised | Detected    | Compromised |
| 1703 | A_32_P217750  | IL3RA        | Hs.632790 | interleukin 3 receptor, alpha (low affinity)                        | Homo sapiens interleukin 3 receptor, alpha (low affinity) (IL3RA), mRNA [NM_002183]                                     | 3.41175 | up | 2.54756 | up | 24.63777    | 7.47751    | 24.33654    | 8.42365    | Detected    | Compromised | Detected    | Compromised |
| 1704 | A_23_P250231  | ANKRD7       | Hs.657737 | ankyrin repeat domain 7                                             | Homo sapiens ankyrin repeat domain 7 (ANKRD7), mRNA [NM_019644]                                                         | 3.41122 | up | 3.75617 | up | 133.59859   | 40.55326   | 135.77437   | 31.87409   | Detected    | Detected    | Detected    | Detected    |
| 1705 | A_32_P67623   | FAM120C      | Hs.86045  | family with sequence similarity 120C                                | Homo sapiens family with sequence similarity 120C (FAM120C), mRNA [NM_017848]                                           | 3.40896 | up | 3.52722 | up | 2931.53340  | 890.44270  | 2161.20830  | 540.29315  | Detected    | Detected    | Detected    | Detected    |
| 1706 | A_33_P3556116 | LOC145678    | Hs.23777  | hypothetical protein LOC145678                                      | Homo sapiens mRNA full length insert cDNA clone EUROIMAGE 35394 [AL109682]                                              | 3.40866 | up | 1.82839 | up | 14.45228    | 4.39022    | 16.12279    | 7.77567    | Detected    | Compromised | Detected    | Compromised |
| 1707 | A_32_P231617  | TM4SF1       | Hs.351316 | transmembrane 4 L six family member 1                               | Homo sapiens transmembrane 4 L six family member 1 (TM4SF1), mRNA [NM_014220]                                           | 3.40665 | up | 3.08102 | up | 17096.97900 | 5196.66900 | 16455.67000 | 4709.62650 | Detected    | Detected    | Detected    | Detected    |
| 1708 | A_23_P121564  | GUCY1B3      | Hs.77890  | guanylate cyclase 1, soluble, beta 3                                | Homo sapiens guanylate cyclase 1, soluble, beta 3 (GUCY1B3), mRNA [NM_000857]                                           | 3.40324 | up | 3.84279 | up | 175.75934   | 53.47599   | 111.30045   | 25.53968   | Detected    | Detected    | Detected    | Detected    |
| 1709 | A_23_P150979  | MUCL1        | Hs.348419 | mucin-like 1                                                        | Homo sapiens mucin-like 1 (MUCL1), mRNA [NM_058173]                                                                     | 3.40226 | up | 5.16980 | up | 90.45718    | 27.53015   | 60.18936    | 10.26625   | Detected    | Detected    | Detected    | Compromised |
| 1710 | A_23_P4161    | ARSG         |           | arylsulfatase G                                                     | Arylsulfatase G Precursor (ASG)\EC 3.1.6.- [Source:UniProtKB/Swiss-Prot;Acc:Q98EG1] [ENST00000355179]                   | 3.40167 | up | 3.49782 | up | 269.70120   | 82.09647   | 221.88147   | 55.93572   | Detected    | Detected    | Detected    | Detected    |
| 1711 | A_32_P232559  | LOC439949    | Hs.590887 | hypothetical protein LOC439949                                      | PREDICTED: Homo sapiens hypothetical protein LOC439949 (LOC439949), mRNA [XM_001128367]                                 | 3.40082 | up | 4.06075 | up | 65.27770    | 19.87532   | 49.82679    | 10.81987   | Detected    | Detected    | Detected    | Compromised |
| 1712 | A_33_P3390207 | TMEM155      | Hs.27524  | transmembrane protein 155                                           | Homo sapiens transmembrane protein 155 (TMEM155), mRNA [NM_152399]                                                      | 3.40038 | up | 5.85635 | up | 26.57940    | 8.09377    | 25.20557    | 3.79520    | Detected    | Compromised | Detected    | Compromised |

|      |               |           |           |                                                                                        |                                                                                                                                                   |         |    |         |    |             |            |             |            |          |             |             |             |
|------|---------------|-----------|-----------|----------------------------------------------------------------------------------------|---------------------------------------------------------------------------------------------------------------------------------------------------|---------|----|---------|----|-------------|------------|-------------|------------|----------|-------------|-------------|-------------|
| 1713 | A_24_P356916  | SLC13A3   | Hs.655498 | solute carrier family 13 (sodium-dependent dicarboxylate transporter), member 3        | Homo sapiens solute carrier family 13 (sodium-dependent dicarboxylate transporter), member 3 (SLC13A3), transcript variant 2, mRNA [NM_001011554] | 3.39894 | up | 2.77815 | up | 279.44970   | 85.13203   | 213.41995   | 67.73985   | Detected | Detected    | Detected    | Detected    |
| 1714 | A_23_P80594   | PLCL2     | Hs.202010 | phospholipase C-like 2                                                                 | Homo sapiens phospholipase C-like 2 (PLCL2), transcript variant 2, mRNA [NM_015184]                                                               | 3.39820 | up | 2.83208 | up | 2247.69500  | 684.89040  | 1238.15590  | 385.50934  | Detected | Detected    | Detected    | Detected    |
| 1715 | A_24_P131589  | CD86      | Hs.171182 | CD86 molecule                                                                          | Homo sapiens CD86 molecule (CD86), transcript variant 2, mRNA [NM_006889]                                                                         | 3.39751 | up | 1.72718 | up | 1226.64230  | 373.84344  | 46.24458    | 23.60967   | Detected | Detected    | Detected    | Detected    |
| 1716 | A_24_P416961  | ARVCF     | Hs.713616 | armadillo repeat gene deletes in velocardiofacial syndrome                             | Homo sapiens armadillo repeat gene deletes in velocardiofacial syndrome (ARVCF), mRNA [NM_001670]                                                 | 3.39537 | up | 4.04400 | up | 639.01373   | 194.87482  | 236.49852   | 51.56830   | Detected | Detected    | Detected    | Detected    |
| 1717 | A_23_P428248  | TTC21A    | Hs.443935 | tetratricopeptide repeat domain 21A                                                    | Homo sapiens tetratricopeptide repeat domain 21A (TTC21A), transcript variant 2, mRNA [NM_145755]                                                 | 3.39198 | up | 3.50495 | up | 1205.40160  | 367.96973  | 1042.41490  | 262.25513  | Detected | Detected    | Detected    | Detected    |
| 1718 | A_33_P3220698 | EPS8L1    | Hs.438862 | EPS8-like 1                                                                            | Homo sapiens EPS8-like 1 (EPS8L1), transcript variant 1, mRNA [NM_133180]                                                                         | 3.39170 | up | 3.16580 | up | 1609.46200  | 491.35645  | 1443.56980  | 402.08658  | Detected | Detected    | Detected    | Detected    |
| 1719 | A_33_P3285540 | CLDN5     | Hs.505337 | claudin 5                                                                              | Homo sapiens claudin 5 (CLDN5), transcript variant 1, mRNA [NM_001130861]                                                                         | 3.39007 | up | 1.31431 | up | 19.81551    | 6.05243    | 11.14288    | 7.47590    | Detected | Compromised | Compromised | Compromised |
| 1720 | A_33_P3382303 | FMNL1     | Hs.720131 | formin-like 1                                                                          | Homo sapiens formin-like 1 (FMNL1), mRNA [NM_005892]                                                                                              | 3.38982 | up | 3.75514 | up | 127.98245   | 39.09370   | 129.19661   | 30.33828   | Detected | Detected    | Detected    | Detected    |
| 1721 | A_33_P3373203 |           |           |                                                                                        |                                                                                                                                                   | 3.38952 | up | 3.11154 | up | 168.67639   | 51.52873   | 99.56650    | 28.21648   | Detected | Detected    | Detected    | Detected    |
| 1722 | A_33_P3399363 | GPR155    | Hs.516604 | G protein-coupled receptor 155                                                         | Homo sapiens G protein-coupled receptor 155 (GPR155), transcript variant 9, mRNA [NM_001033045]                                                   | 3.38946 | up | 3.64750 | up | 159.63731   | 48.76824   | 123.96223   | 29.96816   | Detected | Detected    | Detected    | Detected    |
| 1723 | A_33_P3239634 | NFYA      | Hs.10441  | nuclear transcription factor Y, alpha                                                  | Homo sapiens nuclear transcription factor Y, alpha (NFYA), transcript variant 1, mRNA [NM_002505]                                                 | 3.38613 | up | 2.80674 | up | 431.47147   | 131.94164  | 292.97107   | 92.04243   | Detected | Detected    | Detected    | Detected    |
| 1724 | A_33_P3421275 | NKX6-3    | Hs.647132 | NK6 homeobox 3                                                                         | Homo sapiens NK6 homeobox 3 (NKX6-3), mRNA [NM_152568]                                                                                            | 3.38414 | up | 4.50921 | up | 374.16632   | 114.48536  | 258.07562   | 50.46759   | Detected | Detected    | Detected    | Detected    |
| 1725 | A_33_P3421611 |           |           |                                                                                        |                                                                                                                                                   | 3.38404 | up | 3.08973 | up | 804.58154   | 246.18813  | 821.20500   | 234.36671  | Detected | Detected    | Detected    | Detected    |
| 1726 | A_33_P3329462 |           | Hs.722230 |                                                                                        | ig32f10.y1 HR85 islet Homo sapiens cDNA 5', mRNA sequence [BM294234]                                                                              | 3.38395 | up | 2.93942 | up | 837.24445   | 256.18960  | 211.83520   | 63.54808   | Detected | Detected    | Detected    | Detected    |
| 1727 | A_23_P130158  | WNT3      | Hs.445884 | wingless-type MMTV integration site family, member 3                                   | Homo sapiens wingless-type MMTV integration site family, member 3 (WNT3), mRNA [NM_030753]                                                        | 3.38270 | up | 3.66578 | up | 719.23870   | 220.16235  | 544.41500   | 130.95697  | Detected | Detected    | Detected    | Detected    |
| 1728 | A_33_P3397905 | BET1      | Hs.489132 | blocked early in transport 1 homolog (S. cerevisiae)                                   | Homo sapiens blocked early in transport 1 homolog (S. cerevisiae) (BET1), mRNA [NM_005868]                                                        | 3.38234 | up | 3.75171 | up | 439.11900   | 134.43042  | 486.01727   | 114.23219  | Detected | Detected    | Detected    | Detected    |
| 1729 | A_23_P58912   | SLC35A1   | Hs.423163 | solute carrier family 35 (CMP-sialic acid transporter), member A1                      | Homo sapiens solute carrier family 35 (CMP-sialic acid transporter), member A1 (SLC35A1), mRNA [NM_006416]                                        | 3.38105 | up | 3.95291 | up | 1278.35280  | 391.50073  | 1099.35580  | 245.23778  | Detected | Detected    | Detected    | Detected    |
| 1730 | A_33_P3605352 | LOC440983 | Hs.535002 | hypothetical gene supported by BC066916                                                | Homo sapiens hypothetical gene supported by BC066916, mRNA (cDNA clone IMAGE-4838452) [BC066916]                                                  | 3.37972 | up | 1.67420 | up | 17.84400    | 5.46695    | 15.09054    | 7.94811    | Detected | Compromised | Detected    | Compromised |
| 1731 | A_23_P10194   | SEZ6L2    | Hs.6314   | seizure related 6 homolog (mouse)-like 2                                               | Homo sapiens seizure related 6 homolog (mouse)-like 2 (SEZ6L2), transcript variant 2, mRNA [NM_201575]                                            | 3.37918 | up | 3.10171 | up | 8300.26100  | 2543.39200 | 8044.77300  | 2287.06200 | Detected | Detected    | Detected    | Detected    |
| 1732 | A_23_P85682   | NFIA      | Hs.191911 | nuclear factor 1/A                                                                     | Homo sapiens nuclear factor 1/A (NFIA), transcript variant 2, mRNA [NM_005595]                                                                    | 3.37602 | up | 3.04742 | up | 1977.55480  | 606.53610  | 1197.00230  | 346.36002  | Detected | Detected    | Detected    | Detected    |
| 1733 | A_33_P3271111 | NINJ1     | Hs.494457 | ninjurin 1                                                                             | Homo sapiens ninjurin 1 (NINJ1), mRNA [NM_004148]                                                                                                 | 3.37435 | up | 3.62090 | up | 31492.26600 | 9663.78600 | 28584.60700 | 6961.14550 | Detected | Detected    | Detected    | Detected    |
| 1734 | A_33_P3264662 | CYP27C1   | Hs.407639 | cytochrome P450, family 27, subfamily C, polypeptide 1                                 | Homo sapiens cytochrome P450, family 27, subfamily C, polypeptide 1 (CYP27C1), mRNA [NM_001001665]                                                | 3.37305 | up | 2.71830 | up | 499.73987   | 153.41045  | 315.68512   | 102.40508  | Detected | Detected    | Detected    | Detected    |
| 1735 | A_23_P40174   | MMP9      | Hs.297413 | matrix metalloproteinase 9 (gelatinase B, 92kDa gelatinase, 92kDa type IV collagenase) | Homo sapiens matrix metalloproteinase 9 (gelatinase B, 92kDa gelatinase, 92kDa type IV collagenase) (MMP9), mRNA [NM_004994]                      | 3.36932 | up | 4.68286 | up | 579.02760   | 177.94675  | 464.11280   | 87.39334   | Detected | Detected    | Detected    | Detected    |
| 1736 | A_23_P136964  | RPGR      | Hs.61438  | retinitis pigmentosa GTPase regulator                                                  | Homo sapiens retinitis pigmentosa GTPase regulator (RPGR), transcript variant A, mRNA [NM_000328]                                                 | 3.36878 | up | 3.25767 | up | 2732.72830  | 839.95630  | 2471.28170  | 668.93054  | Detected | Detected    | Detected    | Detected    |
| 1737 | A_33_P3266444 | MRPS25    | Hs.715617 | mitochondrial ribosomal protein S25                                                    | Homo sapiens mitochondrial ribosomal protein S25 (MRPS25), nuclear gene encoding mitochondrial protein, mRNA [NM_022497]                          | 3.36762 | up | 3.17167 | up | 1602.99580  | 492.88116  | 1236.05750  | 343.64975  | Detected | Detected    | Detected    | Detected    |
| 1738 | A_23_P210048  | HDAC4     | Hs.20516  | histone deacetylase 4                                                                  | Homo sapiens histone deacetylase 4 (HDAC4), mRNA [NM_006037]                                                                                      | 3.36728 | up | 4.89179 | up | 1338.12560  | 411.48150  | 691.21790   | 124.59839  | Detected | Detected    | Detected    | Detected    |
| 1739 | A_33_P3387110 | LOC145783 | Hs.620525 | hypothetical LOC145783                                                                 | Homo sapiens hypothetical LOC145783 (LOC145783), non-coding RNA [NR_015419]                                                                       | 3.36695 | up | 5.91598 | up | 38.19764    | 11.74716   | 43.03569    | 6.41457    | Detected | Compromised | Detected    | Compromised |
| 1740 | A_24_P156267  | SOX12     | Hs.43627  | SRY (sex determining region Y)-box 12                                                  | Homo sapiens SRY (sex determining region Y)-box 12 (SOX12), mRNA [NM_006943]                                                                      | 3.36651 | up | 4.81029 | up | 72.84500    | 22.40542   | 55.37658    | 10.15128   | Detected | Detected    | Detected    | Compromised |
| 1741 | A_23_P90601   | STEAP3    | Hs.647822 | STEAP family member 3                                                                  | Homo sapiens STEAP family member 3 (STEAP3), transcript variant 1, mRNA [NM_182915]                                                               | 3.36638 | up | 3.50103 | up | 15551.47400 | 4783.46000 | 19297.06000 | 4860.27540 | Detected | Detected    | Detected    | Detected    |
| 1742 | A_33_P3238335 |           | Hs.535239 |                                                                                        | Mucolipin-3 [Source:UniProtKB/Swiss-Prot;Acc:Q8TDD5] [ENST00000370587]                                                                            | 3.36515 | up | 1.75982 | up | 80.26930    | 24.69891   | 23.95441    | 12.00282   | Detected | Detected    | Detected    | Compromised |
| 1743 | A_23_P114947  | RGS2      | Hs.78944  | regulator of G-protein signaling 2, 24kDa                                              | Homo sapiens regulator of G-protein signaling 2, 24kDa (RGS2), mRNA [NM_002923]                                                                   | 3.36457 | up | 3.31915 | up | 6021.32500  | 1853.08690 | 4250.02930  | 1129.09350 | Detected | Detected    | Detected    | Detected    |

|      |               |           |           |                                                                     |                                                                                                                        |         |    |         |    |             |             |             |            |          |             |             |             |
|------|---------------|-----------|-----------|---------------------------------------------------------------------|------------------------------------------------------------------------------------------------------------------------|---------|----|---------|----|-------------|-------------|-------------|------------|----------|-------------|-------------|-------------|
| 1744 | A_33_P3357949 | ETV1      | Hs.22634  | ets variant 1                                                       | Homo sapiens ets variant 1 (ETV1), transcript variant 1, mRNA [NM_004956]                                              | 3.36277 | up | 3.24076 | up | 2218.69500  | 683.17706   | 1149.69780  | 312.82526  | Detected | Detected    | Detected    | Detected    |
| 1745 | A_23_P431330  | CRIPAK    | Hs.26410  | cysteine-rich PAK1 inhibitor                                        | Homo sapiens cysteine-rich PAK1 inhibitor (CRIPAK), mRNA [NM_175918]                                                   | 3.36065 | up | 3.19568 | up | 1937.77210  | 597.05210   | 1074.60560  | 296.51843  | Detected | Detected    | Detected    | Detected    |
| 1746 | A_33_P3313640 |           |           |                                                                     |                                                                                                                        | 3.35789 | up | 1.15604 | up | 346.62686   | 106.88788   | 33.98067    | 25.91929   | Detected | Detected    | Detected    | Detected    |
| 1747 | A_23_P104804  | ZBTB16    | Hs.591945 | zinc finger and BTB domain containing 16                            | Homo sapiens zinc finger and BTB domain containing 16 (ZBTB16), transcript variant 1, mRNA [NM_006006]                 | 3.35599 | up | 3.20976 | up | 4052.93870  | 1250.49820  | 4179.66600  | 1148.24630 | Detected | Detected    | Detected    | Detected    |
| 1748 | A_23_P306956  | ZNF566    | Hs.533939 | zinc finger protein 566                                             | Homo sapiens zinc finger protein 566 (ZNF566), transcript variant 3, mRNA [NM_032838]                                  | 3.35362 | up | 3.29340 | up | 24.33061    | 7.51235     | 18.33152    | 4.90817    | Detected | Compromised | Detected    | Compromised |
| 1749 | A_33_P3273480 | BRSK2     | Hs.170819 | BR serine/threonine kinase 2                                        | Homo sapiens BR serine/threonine kinase 2 (BRSK2), mRNA [NM_003957]                                                    | 3.35322 | up | 4.18816 | up | 32.42313    | 10.01212    | 25.81219    | 5.43460    | Detected | Compromised | Detected    | Compromised |
| 1750 | A_23_P382043  | NTSDC1    | Hs.719198 | 5'-nucleotidase domain containing 1                                 | Homo sapiens 5'-nucleotidase domain containing 1 (NTSDC1), mRNA [NM_152729]                                            | 3.35258 | up | 3.76160 | up | 1665.52160  | 514.40424   | 1035.24300  | 242.68092  | Detected | Detected    | Detected    | Detected    |
| 1751 | A_32_P5276    | SGEF      | Hs.240845 | Src homology 3 domain-containing guanine nucleotide exchange factor | Homo sapiens Src homology 3 domain-containing guanine nucleotide exchange factor (SGEF), mRNA [NM_015595]              | 3.35067 | up | 3.35058 | up | 696.46990   | 215.23064   | 625.61490   | 164.64664  | Detected | Detected    | Detected    | Detected    |
| 1752 | A_23_P24948   | KCNE3     | Hs.523899 | potassium voltage-gated channel, Isk-related family, member 3       | Homo sapiens potassium voltage-gated channel, Isk-related family, member 3 (KCNE3), mRNA [NM_005472]                   | 3.34961 | up | 3.45120 | up | 27.69973    | 8.56278     | 18.19641    | 4.64923    | Detected | Compromised | Detected    | Compromised |
| 1753 | A_23_P29663   | ZMYND10   | Hs.526735 | zinc finger, MYND-type containing 10                                | Homo sapiens zinc finger, MYND-type containing 10 (ZMYND10), mRNA [NM_015896]                                          | 3.34895 | up | 3.07910 | up | 112.50269   | 34.78461    | 114.30830   | 32.73550   | Detected | Detected    | Detected    | Detected    |
| 1754 | A_23_P305877  | C9orf123  | Hs.7517   | chromosome 9 open reading frame 123                                 | Homo sapiens chromosome 9 open reading frame 123 (C9orf123), mRNA [NM_034428]                                          | 3.34610 | up | 4.25329 | up | 216.78940   | 67.08602    | 153.27502   | 31.77691   | Detected | Detected    | Detected    | Detected    |
| 1755 | A_24_P808100  | MCTS1     | Hs.102696 | malignant T cell amplified sequence 1                               | Homo sapiens malignant T cell amplified sequence 1 (MCTS1), transcript variant 1, mRNA [NM_014060]                     | 3.34420 | up | 3.26019 | up | 205.85536   | 63.73870    | 123.76613   | 33.47527   | Detected | Detected    | Detected    | Detected    |
| 1756 | A_24_P269129  | ZDHHC14   | Hs.187459 | zinc finger, DHHC-type containing 14                                | Homo sapiens zinc finger, DHHC-type containing 14 (ZDHHC14), transcript variant 2, mRNA [NM_153746]                    | 3.34347 | up | 3.41259 | up | 107.59398   | 33.32147    | 84.31381    | 21.78611   | Detected | Detected    | Detected    | Detected    |
| 1757 | A_33_P3269208 | STX19     | Hs.679768 | syntaxin 19                                                         | Homo sapiens syntaxin 19 (STX19), mRNA [NM_001001850]                                                                  | 3.34270 | up | 8.44525 | up | 46.72910    | 14.47515    | 28.43114    | 2.96857    | Detected | Compromised | Detected    | Compromised |
| 1758 | A_33_P3309662 | GPX4      | Hs.433951 | glutathione peroxidase 4 (phospholipid hydroperoxidase)             | Homo sapiens glutathione peroxidase 4 (phospholipid hydroperoxidase) (GPX4), transcript variant 3, mRNA [NM_001039848] | 3.34178 | up | 3.03888 | up | 38499.97000 | 11929.30200 | 33813.95300 | 9811.78300 | Detected | Detected    | Detected    | Detected    |
| 1759 | A_23_P354074  | LYST      | Hs.532411 | lysosomal trafficking regulator                                     | Homo sapiens lysosomal trafficking regulator (LYST), mRNA [NM_000081]                                                  | 3.33780 | up | 3.50033 | up | 1707.49670  | 529.70337   | 914.33340   | 230.33540  | Detected | Detected    | Detected    | Detected    |
| 1760 | A_33_P3287228 |           | Hs.568276 |                                                                     | IQ domain-containing protein D [Source:UniProtKB/Swiss-Prot;Acc:Q96DY2] [ENST00000392574]                              | 3.33619 | up | 7.44932 | up | 37.31191    | 11.58055    | 27.00180    | 3.19626    | Detected | Compromised | Detected    | Compromised |
| 1761 | A_33_P3456233 | LOC286254 | Hs.635171 | hypothetical protein LOC286254                                      | Homo sapiens cDNA FLJ35432 fis, clone SMINT2002311 [AK092751]                                                          | 3.32730 | up | 4.93090 | up | 606.14166   | 188.63219   | 472.33295   | 84.46707   | Detected | Detected    | Detected    | Detected    |
| 1762 | A_33_P3388376 | TBC1D3B   | Hs.454713 | TBC1 domain family, member 3B                                       | Homo sapiens TBC1 domain family, member 3B (TBC1D3B), mRNA [NM_001001417]                                              | 3.32647 | up | 2.65039 | up | 18.65774    | 5.80775     | 13.53422    | 4.50287    | Detected | Compromised | Compromised | Compromised |
| 1763 | A_33_P3376806 | C10orf67  | Hs.522360 | chromosome 10 open reading frame 67                                 | Homo sapiens chromosome 10 open reading frame 67 (C10orf67), mRNA [NM_153714]                                          | 3.32542 | up | 3.86883 | up | 149.93806   | 46.68728    | 126.95039   | 28.93476   | Detected | Detected    | Detected    | Detected    |
| 1764 | A_32_P191441  | C10orf90  | Hs.587663 | chromosome 10 open reading frame 90                                 | Homo sapiens chromosome 10 open reading frame 90 (C10orf90), mRNA [NM_001004298]                                       | 3.32210 | up | 3.41843 | up | 503.95825   | 157.07810   | 507.93720   | 131.02342  | Detected | Detected    | Detected    | Detected    |
| 1765 | A_33_P3240538 | TUBE1     | Hs.34851  | tubulin, epsilon 1                                                  | Homo sapiens tubulin, epsilon 1 (TUBE1), mRNA [NM_016262]                                                              | 3.32193 | up | 3.33073 | up | 1822.66150  | 568.13135   | 1274.64090  | 337.45337  | Detected | Detected    | Detected    | Detected    |
| 1766 | A_33_P3351664 | CCDC57    | Hs.631724 | coiled-coil domain containing 57                                    | Homo sapiens coiled-coil domain containing 57 (CCDC57), mRNA [NM_198082]                                               | 3.32182 | up | 3.71923 | up | 1948.60060  | 607.40630   | 1683.95740  | 399.24920  | Detected | Detected    | Detected    | Detected    |
| 1767 | A_33_P3266719 | TET2      | Hs.367639 | tet oncogene family member 2                                        | Homo sapiens tet oncogene family member 2 (TET2), transcript variant 2, mRNA [NM_017628]                               | 3.32021 | up | 3.20611 | up | 108.72416   | 33.90730    | 75.47787    | 20.75903   | Detected | Detected    | Detected    | Detected    |
| 1768 | A_23_P434430  | ZNF439    | Hs.528731 | zinc finger protein 439                                             | Homo sapiens zinc finger protein 439 (ZNF439), mRNA [NM_152262]                                                        | 3.31406 | up | 3.06807 | up | 478.76898   | 149.58860   | 287.89963   | 82.74487   | Detected | Detected    | Detected    | Detected    |
| 1769 | A_23_P123086  | KIAA1908  | Hs.436146 | hypothetical LOC114796                                              | Homo sapiens hypothetical LOC114796 (KIAA1908), transcript variant 1, non-coding RNA [NR_027329]                       | 3.31108 | up | 2.67927 | up | 455.75275   | 142.52562   | 388.34558   | 127.81082  | Detected | Detected    | Detected    | Detected    |
| 1770 | A_23_P39131   | GLTSCR2   | Hs.421907 | glioma tumor suppressor candidate region gene 2                     | Homo sapiens glioma tumor suppressor candidate region gene 2 (GLTSCR2), mRNA [NM_015710]                               | 3.31005 | up | 2.85403 | up | 7135.15400  | 2232.04170  | 9520.51300  | 2941.48780 | Detected | Detected    | Detected    | Detected    |
| 1771 | A_23_P68487   | BMP7      | Hs.473163 | bone morphogenetic protein 7                                        | Homo sapiens bone morphogenetic protein 7 (BMP7), mRNA [NM_001719]                                                     | 3.30932 | up | 1.43095 | up | 34.69455    | 10.85565    | 28.08055    | 17.30404   | Detected | Compromised | Detected    | Detected    |
| 1772 | A_33_P3369461 | AMIGO1    | Hs.655656 | adhesion molecule with Ig-like domain 1                             | Homo sapiens adhesion molecule with Ig-like domain 1 (AMIGO1), mRNA [NM_020703]                                        | 3.30928 | up | 2.76182 | up | 48.82508    | 15.27714    | 42.60979    | 13.60440   | Detected | Compromised | Detected    | Compromised |
| 1773 | A_23_P171388  | TMSB4Y    | Hs.159201 | thymosin beta 4, Y-linked                                           | Homo sapiens thymosin beta 4, Y-linked (TMSB4Y), mRNA [NM_004202]                                                      | 3.30717 | up | 6.01317 | up | 168.74435   | 52.83315    | 63.03204    | 9.24322    | Detected | Detected    | Detected    | Compromised |
| 1774 | A_23_P23639   | MCOLN2    | Hs.591446 | mucopolip 2                                                         | Homo sapiens mucopolip 2 (MCOLN2), mRNA [NM_153259]                                                                    | 3.30703 | up | 2.65507 | up | 31.19053    | 9.76603     | 34.10172    | 11.32572   | Detected | Compromised | Detected    | Compromised |
| 1775 | A_33_P3404899 | LPHN2     | Hs.24212  | latrophilin 2                                                       | Homo sapiens latrophilin 2 (LPHN2), mRNA [NM_012302]                                                                   | 3.30524 | up | 2.22107 | up | 49.21060    | 15.41660    | 32.42074    | 12.87143   | Detected | Compromised | Detected    | Compromised |

|      |               |           |           |                                                                     |                                                                                                                                                    |         |    |          |            |            |            |            |             |             |          |             |
|------|---------------|-----------|-----------|---------------------------------------------------------------------|----------------------------------------------------------------------------------------------------------------------------------------------------|---------|----|----------|------------|------------|------------|------------|-------------|-------------|----------|-------------|
| 1776 | A_23.P110234  | CSN1S1    | Hs.3155   | casein alpha s1                                                     | Homo sapiens casein alpha s1 (CSN1S1), transcript variant 1, mRNA [NM_001890]                                                                      | 3.30414 | up | 2.66120  | 69.34351   | 21.73105   | 53.49363   | 17.72514   | Detected    | Detected    | Detected | Detected    |
| 1777 | A_24.P74508   | SLC25A18  | Hs.282982 | solute carrier family 25 (mitochondrial carrier), member 18         | Homo sapiens solute carrier family 25 (mitochondrial carrier), member 18 (SLC25A18), nuclear gene encoding mitochondrial protein, mRNA [NM_031481] | 3.30256 | up | 6.69899  | 24.55994   | 7.70033    | 19.89780   | 2.61916    | Detected    | Compromised | Detected | Compromised |
| 1778 | A_24.P49183   | EXD3      | Hs.495553 | exonuclease 3'-5' domain containing 3                               | Homo sapiens exonuclease 3'-5' domain containing 3 (EXD3), mRNA [NM_017820]                                                                        | 3.30256 | up | 11.31794 | 34.96183   | 10.96166   | 41.65928   | 3.24571    | Detected    | Compromised | Detected | Compromised |
| 1779 | A_23.P128201  | NCKAP1L   | Hs.182014 | NCK-associated protein 1-like                                       | Homo sapiens NCK-associated protein 1-like (NCKAP1L), mRNA [NM_005337]                                                                             | 3.30046 | up | 3.77996  | 23.98062   | 7.52348    | 21.25066   | 4.95736    | Detected    | Compromised | Detected | Compromised |
| 1780 | A_23.P152620  | TNFSF13   | Hs.54673  | tumor necrosis factor (ligand) superfamily, member 13               | Homo sapiens tumor necrosis factor (ligand) superfamily, member 13 (TNFSF13), transcript variant gamma, mRNA [NM_172088]                           | 3.29152 | up | 3.38086  | 241.37310  | 75.93219   | 250.86080  | 65.42909   | Detected    | Detected    | Detected | Detected    |
| 1781 | A_23.P106773  | SULT1A2   | Hs.546304 | sulfotransferase family, cytosolic, 1A, phenol-preferring, member 2 | Homo sapiens sulfotransferase family, cytosolic, 1A, phenol-preferring, member 2 (SULT1A2), transcript variant 2, mRNA [NM_177528]                 | 3.29043 | up | 3.15481  | 2024.97100 | 637.23364  | 622.47650  | 173.98610  | Detected    | Detected    | Detected | Detected    |
| 1782 | A_32.P212058  | C3orf34   | Hs.282800 | chromosome 3 open reading frame 34                                  | Homo sapiens chromosome 3 open reading frame 34 (C3orf34), mRNA [NM_032898]                                                                        | 3.28655 | up | 3.26176  | 417.85086  | 131.64812  | 248.25688  | 67.11423   | Detected    | Detected    | Detected | Detected    |
| 1783 | A_24.P184445  | MMP19     | Hs.591033 | matrix metalloproteinase 19                                         | Homo sapiens matrix metalloproteinase 19 (MMP19), transcript variant 1, mRNA [NM_002429]                                                           | 3.28633 | up | 3.33740  | 1573.85160 | 495.89005  | 1443.50400 | 381.39545  | Detected    | Detected    | Detected | Detected    |
| 1784 | A_23.P120062  | C2orf3    | Hs.303808 | chromosome 2 open reading frame 3                                   | Homo sapiens chromosome 2 open reading frame 3 (C2orf3), mRNA [NM_003203]                                                                          | 3.28617 | up | 3.27116  | 2689.47950 | 847.44360  | 1702.17190 | 458.84640  | Detected    | Detected    | Detected | Detected    |
| 1785 | A_33.P3217649 | C9orf116  | Hs.414028 | chromosome 9 open reading frame 116                                 | Homo sapiens chromosome 9 open reading frame 116 (C9orf116), transcript variant 1, mRNA [NM_001048265]                                             | 3.28421 | up | 2.87939  | 784.76636  | 247.42477  | 753.50745  | 230.75587  | Detected    | Detected    | Detected | Detected    |
| 1786 | A_23.P161156  | ZNF438    | Hs.660642 | zinc finger protein 438                                             | Homo sapiens zinc finger protein 438 (ZNF438), transcript variant 2, mRNA [NM_182755]                                                              | 3.28395 | up | 3.05094  | 8951.29700 | 2822.42580 | 6569.07230 | 1904.39220 | Detected    | Detected    | Detected | Detected    |
| 1787 | A_33.P3345708 | CREB3L4   | Hs.372924 | cAMP responsive element binding protein 3-like 4                    | Homo sapiens cAMP responsive element binding protein 3-like 4 (CREB3L4), mRNA [NM_130898]                                                          | 3.28355 | up | 4.32702  | 763.54610  | 240.78235  | 704.89734  | 143.64902  | Detected    | Detected    | Detected | Detected    |
| 1788 | A_23.P130735  | SLC6A16   | Hs.130949 | solute carrier family 6, member 16                                  | Homo sapiens solute carrier family 6, member 16 (SLC6A16), mRNA [NM_014037]                                                                        | 3.28263 | up | 4.07650  | 429.04285  | 135.33570  | 239.76053  | 51.86281   | Detected    | Detected    | Detected | Detected    |
| 1789 | A_33.P3317543 | GTF2IRD2  | Hs.647017 | GTF2I repeat domain containing 2                                    | Homo sapiens GTF2I repeat domain containing 2 (GTF2IRD2), mRNA [NM_173537]                                                                         | 3.28066 | up | 2.86278  | 120.66916  | 38.08629   | 174.16417  | 53.64592   | Detected    | Detected    | Detected | Detected    |
| 1790 | A_33.P3649236 | FLJ39534  | Hs.570631 | hypothetical FLJ39534                                               | Homo sapiens cDNA FLJ39534 fis, clone CTONG2018279 [AK091264]                                                                                      | 3.27914 | up | 2.57471  | 138.70801  | 43.80007   | 111.93742  | 38.33657   | Detected    | Detected    | Detected | Detected    |
| 1791 | A_23.P153583  | PPP5C     | Hs.654604 | protein phosphatase 5, catalytic subunit                            | Homo sapiens protein phosphatase 5, catalytic subunit (PPP5C), mRNA [NM_006247]                                                                    | 3.27889 | up | 1.28325  | 1766.54940 | 557.86957  | 799.48020  | 549.36630  | Detected    | Detected    | Detected | Detected    |
| 1792 | A_23.P363275  | WDR66     | Hs.709837 | WD repeat domain 66                                                 | Homo sapiens WD repeat domain 66 (WDR66), mRNA [NM_144668]                                                                                         | 3.27776 | up | 3.39891  | 95.61202   | 30.20429   | 97.14960   | 25.20381   | Detected    | Detected    | Detected | Detected    |
| 1793 | A_24.P109071  | KIF27     | Hs.697514 | kinesin family member 27                                            | Homo sapiens kinesin family member 27 (KIF27), mRNA [NM_017576]                                                                                    | 3.27561 | up | 3.66008  | 71.66179   | 22.65316   | 53.24745   | 12.82845   | Detected    | Detected    | Detected | Compromised |
| 1794 | A_32.P489130  | BRWD3     | Hs.170667 | bromodomain and WD repeat domain containing 3                       | Homo sapiens bromodomain and WD repeat domain containing 3 (BRWD3), mRNA [NM_153252]                                                               | 3.27433 | up | 2.77034  | 194.48450  | 61.50298   | 123.97522  | 39.46098   | Detected    | Detected    | Detected | Detected    |
| 1795 | A_23.P302018  | TXK       | Hs.479669 | TXK tyrosine kinase                                                 | Homo sapiens TXK tyrosine kinase (TXK), mRNA [NM_003328]                                                                                           | 3.27417 | up | 3.78992  | 12.63491   | 3.99581    | 16.68772   | 3.88269    | Compromised | Compromised | Detected | Compromised |
| 1796 | A_33.P3265301 | GJD3      | Hs.444663 | gap junction protein, delta 3, 31.9kDa                              | Homo sapiens gap junction protein, delta 3, 31.9kDa (GJD3), mRNA [NM_152219]                                                                       | 3.27158 | up | 3.73841  | 415.18372  | 131.40623  | 436.67474  | 102.99990  | Detected    | Detected    | Detected | Detected    |
| 1797 | A_23.P111860  | RADL      | Hs.667336 | Ras association and DIL domains                                     | Homo sapiens Ras association and DIL domains (RADL), mRNA [NM_018059]                                                                              | 3.27080 | up | 3.98136  | 2471.22950 | 782.33405  | 1736.54140 | 384.60852  | Detected    | Detected    | Detected | Detected    |
| 1798 | A_23.P211167  | C21orf2   | Hs.517331 | chromosome 21 open reading frame 2                                  | Homo sapiens chromosome 21 open reading frame 2 (C21orf2), mRNA [NM_004928]                                                                        | 3.27018 | up | 2.89205  | 371.11703  | 117.50931  | 379.00534  | 115.55949  | Detected    | Detected    | Detected | Detected    |
| 1799 | A_23.P158925  | GPR125    | Hs.99195  | G protein-coupled receptor 125                                      | Homo sapiens G protein-coupled receptor 125 (GPR125), mRNA [NM_145290]                                                                             | 3.26799 | up | 3.42790  | 9099.14900 | 2883.05470 | 6871.06450 | 1767.50840 | Detected    | Detected    | Detected | Detected    |
| 1800 | A_33.P3380063 | ADAMTSL4  | Hs.719991 | ADAMTS-like 4                                                       | Homo sapiens ADAMTS-like 4 (ADAMTSL4), transcript variant 2, mRNA [NM_025008]                                                                      | 3.26771 | up | 4.07263  | 2146.69950 | 680.23895  | 2664.96880 | 577.00867  | Detected    | Detected    | Detected | Detected    |
| 1801 | A_33.P3285132 | ZNF599    | Hs.590961 | zinc finger protein 599                                             | Homo sapiens zinc finger protein 599 (ZNF599), mRNA [NM_001007248]                                                                                 | 3.26757 | up | 1.56556  | 34.52332   | 10.94009   | 25.91915   | 14.59877   | Detected    | Compromised | Detected | Detected    |
| 1802 | A_24.P481783  | LOC390595 | Hs.659256 | similar to ubiquitin-associated protein 1 (predicted)               | Homo sapiens similar to ubiquitin-associated protein 1 (predicted) (LOC390595), mRNA [NM_001163692]                                                | 3.26738 | up | 3.10985  | 679.22797  | 215.25311  | 585.92430  | 166.13730  | Detected    | Detected    | Detected | Detected    |
| 1803 | A_24.P456490  | C1orf204  | Hs.647718 | chromosome 1 open reading frame 204                                 | Homo sapiens chromosome 1 open reading frame 204 (C1orf204), mRNA [NM_001134233]                                                                   | 3.26489 | up | 4.58459  | 56.72392   | 17.98997   | 48.61577   | 9.35065    | Detected    | Detected    | Detected | Compromised |
| 1804 | A_23.P202496  | NOC3L     | Hs.74899  | nucleolar complex associated 3 homolog (S. cerevisiae)              | Homo sapiens nucleolar complex associated 3 homolog (S. cerevisiae) (NOC3L), mRNA [NM_022451]                                                      | 3.26212 | up | 3.26686  | 2909.44630 | 923.51540  | 2156.93950 | 582.20013  | Detected    | Detected    | Detected | Detected    |
| 1805 | A_23.P200637  | FBXO44    | Hs.556006 | F-box protein 44                                                    | Homo sapiens F-box protein 44 (FBXO44), transcript variant 4, mRNA [NM_001014765]                                                                  | 3.26043 | up | 2.45825  | 224.58595  | 71.32488   | 231.45303  | 83.02385   | Detected    | Detected    | Detected | Detected    |
| 1806 | A_33.P3353996 | PPP1R3G   | Hs.653089 | protein phosphatase 1, regulatory (inhibitor) subunit 3G            | Homo sapiens protein phosphatase 1, regulatory (inhibitor) subunit 3G (PPP1R3G), mRNA [NM_001145115]                                               | 3.26005 | up | 2.93385  | 489.36780  | 155.43356  | 587.98346  | 176.72258  | Detected    | Detected    | Detected | Detected    |

|      |               |              |           |                                                       |                                                                                                                                                                                                                          |         |    |         |    |             |            |            |            |             |             |          |             |
|------|---------------|--------------|-----------|-------------------------------------------------------|--------------------------------------------------------------------------------------------------------------------------------------------------------------------------------------------------------------------------|---------|----|---------|----|-------------|------------|------------|------------|-------------|-------------|----------|-------------|
| 1807 | A_23_P43317   | PRDM12       | Hs.495311 | PR domain containing 12                               | Homo sapiens PR domain containing 12 (PRDM12), mRNA [NM_021619]                                                                                                                                                          | 3.25705 | up | 2.63694 | up | 77.02335    | 24.48676   | 66.33418   | 22.18207   | Detected    | Detected    | Detected | Detected    |
| 1808 | A_23_P133648  | FAM8A1       | Hs.95260  | family with sequence similarity 8, member A1          | Homo sapiens family with sequence similarity 8, member A1 (FAM8A1), mRNA [NM_016255]                                                                                                                                     | 3.25553 | up | 3.31803 | up | 802.26600   | 255.16994  | 444.42126  | 118.10822  | Detected    | Detected    | Detected | Detected    |
| 1809 | A_23_P156861  | RGS17        | Hs.166313 | regulator of G-protein signaling 17                   | Homo sapiens regulator of G-protein signaling 17 (RGS17), mRNA [NM_012419]                                                                                                                                               | 3.24953 | up | 3.45866 | up | 574.71590   | 183.13281  | 349.17980  | 89.02399   | Detected    | Detected    | Detected | Detected    |
| 1810 | A_23_P364437  | CDH23        | Hs.656032 | cadherin-like 23                                      | Homo sapiens cadherin-like 23 (CDH23), transcript variant 1, mRNA [NM_022124]                                                                                                                                            | 3.24931 | up | 2.61979 | up | 37.57147    | 11.97293   | 14.81460   | 4.98642    | Detected    | Compromised | Detected | Compromised |
| 1811 | A_33_P3279708 | RNU2-2       | Hs.640133 | RNA, U2 small nuclear 2                               | Homo sapiens RNA, U2 small nuclear 2 (RNU2-2), small nuclear RNA [NR_002761]                                                                                                                                             | 3.24894 | up | 2.74596 | up | 1051.34890  | 335.07250  | 1027.35620 | 329.90760  | Detected    | Detected    | Detected | Detected    |
| 1812 | A_33_P3368750 | PAQR5        | Hs.591096 | progesterin and adipoQ receptor family member V       | Homo sapiens progesterin and adipoQ receptor family member V (PAQR5), transcript variant 1, mRNA [NM_001104554]                                                                                                          | 3.24798 | up | 4.25104 | up | 1535.94560  | 489.66130  | 1506.67420 | 312.52844  | Detected    | Detected    | Detected | Detected    |
| 1813 | A_23_P312851  | SILV         | Hs.95972  | silver homolog (mouse)                                | Homo sapiens silver homolog (mouse) (SILV), mRNA [NM_006928]                                                                                                                                                             | 3.24616 | up | 2.47211 | up | 70.37856    | 22.44931   | 81.25911   | 28.98480   | Detected    | Detected    | Detected | Detected    |
| 1814 | A_23_P12241   | MCOLN3       | Hs.535239 | mucoilin 3                                            | Homo sapiens mucoilin 3 (MCOLN3), mRNA [NM_018298]                                                                                                                                                                       | 3.24608 | up | 2.62447 | up | 28.86564    | 9.20777    | 13.98728   | 4.69957    | Detected    | Compromised | Detected | Compromised |
| 1815 | A_23_P217098  | VPS13A       | Hs.459790 | vacuolar protein sorting 13 homolog A (S. cerevisiae) | Homo sapiens vacuolar protein sorting 13 homolog A (S. cerevisiae) (VPS13A), transcript variant A, mRNA [NM_033305]                                                                                                      | 3.24242 | up | 3.25346 | up | 1091.27700  | 348.49725  | 638.02350  | 172.92480  | Detected    | Detected    | Detected | Detected    |
| 1816 | A_33_P3314166 |              | Hs.689460 |                                                       | Homo sapiens cDNA FLJ46531 fis, clone THYMU3036310, [AK128388]                                                                                                                                                           | 3.23628 | up | 3.39539 | up | 216.91240   | 69.40195   | 133.82097  | 34.75362   | Detected    | Detected    | Detected | Detected    |
| 1817 | A_33_P3397073 |              | Hs.549204 |                                                       | Proline-rich transmembrane protein 1 [Source:UniProtKB/Swiss-Prot;Acc:Q99946] [ENST00000427462]                                                                                                                          | 3.23552 | up | 3.09197 | up | 562.12177   | 179.89493  | 548.24457  | 156.35257  | Detected    | Detected    | Detected | Detected    |
| 1818 | A_32_P52018   | PHACTR1      | Hs.436996 | phosphatase and actin regulator 1                     | Homo sapiens phosphatase and actin regulator 1 (PHACTR1), mRNA [NM_030948]                                                                                                                                               | 3.23366 | up | 2.52427 | up | 52.35361    | 16.76431   | 84.57846   | 29.54536   | Detected    | Compromised | Detected | Detected    |
| 1819 | A_32_P134290  | ZOCHC2       | Hs.114191 | zinc finger, CCHC domain containing 2                 | Homo sapiens zinc finger, CCHC domain containing 2 (ZOCHC2), mRNA [NM_017742]                                                                                                                                            | 3.23338 | up | 3.11755 | up | 1173.92880  | 375.93920  | 901.53064  | 254.99518  | Detected    | Detected    | Detected | Detected    |
| 1820 | A_23_P904     | BEND5        | Hs.475348 | BEN domain containing 5                               | Homo sapiens BEN domain containing 5 (BEND5), mRNA [NM_024603]                                                                                                                                                           | 3.23003 | up | 4.44474 | up | 116.40548   | 37.31645   | 78.48320   | 15.57027   | Detected    | Detected    | Detected | Compromised |
| 1821 | A_32_P85999   | CDH13        | Hs.654386 | cadherin 13, H-cadherin (heart)                       | Homo sapiens cadherin 13, H-cadherin (heart) (CDH13), mRNA [NM_001257]                                                                                                                                                   | 3.22907 | up | 3.30198 | up | 10328.62200 | 3312.05960 | 7102.83840 | 1896.80870 | Detected    | Detected    | Detected | Detected    |
| 1822 | A_24_P943301  | PEAR1        | Hs.142003 | platelet endothelial aggregation receptor 1           | Homo sapiens platelet endothelial aggregation receptor 1 (PEAR1), mRNA [NM_001080471]                                                                                                                                    | 3.22842 | up | 2.58773 | up | 163.78783   | 52.53207   | 142.25570  | 48.47480   | Detected    | Detected    | Detected | Detected    |
| 1823 | A_24_P941922  |              | Hs.490224 |                                                       | CCR4-NOT transcription complex subunit 4 (EC 6.3.2.-)(E3 ubiquitin-protein ligase CNOT4/CCR4-associated factor 4)(Potential transcriptional repressor NOT4Hp) [Source:UniProtKB/Swiss-Prot;Acc:O95628] [ENST00000315544] | 3.22487 | up | 3.06329 | up | 129.02762   | 41.42889   | 95.79286   | 27.57472   | Detected    | Detected    | Detected | Detected    |
| 1824 | A_33_P3888485 | BCO2         | Hs.647227 | beta-carotene oxygenase 2                             | Homo sapiens beta-carotene oxygenase 2 (BCO2), transcript variant 1, mRNA [NM_031938]                                                                                                                                    | 3.21931 | up | 4.05313 | up | 292.88007   | 94.20188   | 155.74474  | 33.88350   | Detected    | Detected    | Detected | Detected    |
| 1825 | A_33_P3690933 | LOC401022    | Hs.98661  | hypothetical LOC401022                                | Homo sapiens hypothetical LOC401022, mRNA (cDNA clone IMAGE:5296725) [BC047481]                                                                                                                                          | 3.21698 | up | 2.51477 | up | 367.97190   | 118.44038  | 270.66370  | 94.90667   | Detected    | Detected    | Detected | Detected    |
| 1826 | A_24_P192727  |              | Hs.632079 |                                                       | Kazal-type serine protease inhibitor domain-containing protein 1 Precursor [Source:UniProtKB/Swiss-Prot;Acc:Q96882] [ENST00000313664]                                                                                    | 3.21601 | up | 2.60849 | up | 4094.32150  | 1318.24760 | 3417.45730 | 1155.25830 | Detected    | Detected    | Detected | Detected    |
| 1827 | A_23_P416894  | PION         | Hs.186649 | pigeon homolog (Drosophila)                           | Homo sapiens pigeon homolog (Drosophila) (PION), mRNA [NM_017439]                                                                                                                                                        | 3.21595 | up | 3.81272 | up | 233.35948   | 75.13628   | 219.79060  | 50.83225   | Detected    | Detected    | Detected | Detected    |
| 1828 | A_33_P3352103 | LYPLAL1      | Hs.657617 | lysophospholipase-like 1                              | Homo sapiens lysophospholipase-like 1 (LYPLAL1), mRNA [NM_138794]                                                                                                                                                        | 3.21459 | up | 3.19356 | up | 1960.50660  | 631.50290  | 1517.36590 | 418.96770  | Detected    | Detected    | Detected | Detected    |
| 1829 | A_23_P93311   | DDR1         | Hs.631988 | discoidin domain receptor tyrosine kinase 1           | Homo sapiens discoidin domain receptor tyrosine kinase 1 (DDR1), transcript variant 1, mRNA [NM_013993]                                                                                                                  | 3.21362 | up | 2.73218 | up | 1082.10450  | 348.66455  | 1119.00240 | 361.14926  | Detected    | Detected    | Detected | Detected    |
| 1830 | A_33_P3427239 | LOC100134937 | Hs.659762 | hypothetical LOC100134937                             | Homo sapiens cDNA clone IMAGE:5263734 [BC035129]                                                                                                                                                                         | 3.21241 | up | 3.32004 | up | 2536.55520  | 817.61170  | 1584.55690 | 420.85272  | Detected    | Detected    | Detected | Detected    |
| 1831 | A_33_P3362900 | LOC375190    | Hs.710370 | hypothetical protein LOC375190                        | Homo sapiens hypothetical protein LOC375190 (LOC375190), mRNA [NM_001145710]                                                                                                                                             | 3.21125 | up | 3.39598 | up | 2917.37500  | 940.69950  | 2516.14770 | 653.33620  | Detected    | Detected    | Detected | Detected    |
| 1832 | A_33_P3344564 |              | Hs.586199 |                                                       | Uncharacterized protein C5orf42 [Source:UniProtKB/Swiss-Prot;Acc:Q9H799] [ENST00000388739]                                                                                                                               | 3.20983 | up | 2.65740 | up | 15.78332    | 5.09154    | 13.72050   | 4.55281    | Detected    | Compromised | Detected | Compromised |
| 1833 | A_23_P344578  | FAM154A      | Hs.720871 | family with sequence similarity 154, member A         | Homo sapiens family with sequence similarity 154, member A (FAM154A), mRNA [NM_153707]                                                                                                                                   | 3.20621 | up | 1.32835 | up | 9.94275     | 3.21106    | 15.86384   | 10.53082   | Compromised | Compromised | Detected | Compromised |
| 1834 | A_33_P3331491 | LOC728392    | Hs.104305 | hypothetical protein LOC728392                        | Homo sapiens hypothetical protein LOC728392 (LOC728392), mRNA [NM_001182371]                                                                                                                                             | 3.20611 | up | 3.33937 | up | 8745.28000  | 2824.41160 | 5729.08840 | 1512.81880 | Detected    | Detected    | Detected | Detected    |
| 1835 | A_33_P3334155 | LOC730495    | Hs.369771 | hypothetical protein LOC730495                        | Homo sapiens cDNA FLJ45934 fis, clone PLACE7003684 [AK127831]                                                                                                                                                            | 3.20605 | up | 3.50368 | up | 127.75951   | 41.26251   | 52.35310   | 13.17601   | Detected    | Detected    | Detected | Compromised |
| 1836 | A_33_P3286621 | SCARNA16     | Hs.722642 | small Cajal body-specific RNA 16                      | Homo sapiens small Cajal body-specific RNA 16 (SCARNA16), guide RNA [NR_003013]                                                                                                                                          | 3.20473 | up | 2.94030 | up | 792.75360   | 256.14117  | 563.69430  | 169.05106  | Detected    | Detected    | Detected | Detected    |

|      |               |              |           |                                                                     |                                                                                                                                       |         |    |         |    |            |            |            |            |          |             |             |             |
|------|---------------|--------------|-----------|---------------------------------------------------------------------|---------------------------------------------------------------------------------------------------------------------------------------|---------|----|---------|----|------------|------------|------------|------------|----------|-------------|-------------|-------------|
| 1837 | A_33_P3265855 | PRR5-ARHGAP8 | Hs.720401 | PRR5-ARHGAP8 readthrough                                            | Homo sapiens PRR5-ARHGAP8 fusion (LOC553158). mRNA [NM_181334]                                                                        | 3.20364 | up | 3.92503 | up | 608.85230  | 196.78946  | 583.90640  | 131.17946  | Detected | Detected    | Detected    | Detected    |
| 1838 | A_32_P79483   | LOC283481    | Hs.646604 | hypothetical protein LOC283481                                      | PREDICTED: Homo sapiens hypothetical protein LOC283481 (LOC283481). mRNA [XM_001128325]                                               | 3.20102 | up | 2.95682 | up | 846.57910  | 273.84988  | 642.83014  | 191.70665  | Detected | Detected    | Detected    | Detected    |
| 1839 | A_32_P68533   | FAM161A      | Hs.440466 | family with sequence similarity 161, member A                       | Homo sapiens family with sequence similarity 161, member A (FAM161A). mRNA [NM_032180]                                                | 3.19860 | up | 2.46817 | up | 325.04373  | 105.22417  | 227.84587  | 81.40136   | Detected | Detected    | Detected    | Detected    |
| 1840 | A_24_P110558  | C5orf53      | Hs.696360 | chromosome 5 open reading frame 53                                  | Homo sapiens chromosome 5 open reading frame 53 (C5orf53). mRNA [NM_001007189]                                                        | 3.19684 | up | 3.74135 | up | 873.86580  | 283.04617  | 522.34670  | 123.11062  | Detected | Detected    | Detected    | Detected    |
| 1841 | A_23_P306890  | POLI         | Hs.438533 | polymerase (DNA directed) iota                                      | Homo sapiens polymerase (DNA directed) iota (POLI). mRNA [NM_007195]                                                                  | 3.19606 | up | 3.28953 | up | 3923.29980 | 1271.07150 | 2167.64380 | 581.05750  | Detected | Detected    | Detected    | Detected    |
| 1842 | A_23_P145984  | TSPAN12      | Hs.16529  | tetraspanin 12                                                      | Homo sapiens tetraspanin 12 (TSPAN12). mRNA [NM_012338]                                                                               | 3.19404 | up | 4.23272 | up | 164.56580  | 53.34979   | 87.04568   | 18.13400   | Detected | Detected    | Detected    | Detected    |
| 1843 | A_23_P324523  | IQCK         | Hs.460217 | IQ motif containing K                                               | Homo sapiens IQ motif containing K (IQCK). mRNA [NM_153208]                                                                           | 3.19286 | up | 3.06883 | up | 3506.24490 | 1137.09140 | 2589.39430 | 739.69147  | Detected | Detected    | Detected    | Detected    |
| 1844 | A_23_P90722   | PTPRN        | Hs.89655  | protein tyrosine phosphatase, receptor type, N                      | Homo sapiens protein tyrosine phosphatase, receptor type, N (PTPRN). mRNA [NM_002846]                                                 | 3.19272 | up | 3.12222 | up | 855.39900  | 277.42215  | 692.73193  | 195.64409  | Detected | Detected    | Detected    | Detected    |
| 1845 | A_33_P3394243 | C1orf101     | Hs.459534 | chromosome 1 open reading frame 101                                 | Homo sapiens chromosome 1 open reading frame 101 (C1orf101). transcript variant 2. mRNA [NM_173807]                                   | 3.19190 | up | 3.89946 | up | 186.21548  | 60.40869   | 159.18535  | 35.99682   | Detected | Detected    | Detected    | Detected    |
| 1846 | A_23_P46412   | SCNN1D       | Hs.512681 | sodium channel, nonvoltage-gated 1, delta                           | Homo sapiens sodium channel, nonvoltage-gated 1, delta (SCNN1D). transcript variant 2. mRNA [NM_002978]                               | 3.19053 | up | 4.12122 | up | 233.71454  | 75.85007   | 170.85457  | 36.55663   | Detected | Detected    | Detected    | Detected    |
| 1847 | A_33_P3368879 | LMOD1        | Hs.519075 | leiomodlin 1 (smooth muscle)                                        | Homo sapiens leiomodlin 1 (smooth muscle) (LMOD1). mRNA [NM_012134]                                                                   | 3.18963 | up | 3.78473 | up | 37.84213   | 12.28481   | 32.98058   | 7.68402    | Detected | Compromised | Detected    | Compromised |
| 1848 | A_23_P389102  | MYO1D        | Hs.658000 | myosin ID                                                           | Homo sapiens myosin ID (MYO1D). mRNA [NM_015194]                                                                                      | 3.18852 | up | 3.27488 | up | 7918.14000 | 2571.38530 | 4539.04900 | 1222.18100 | Detected | Detected    | Detected    | Detected    |
| 1849 | A_23_P147641  | TCEA2        | Hs.505004 | transcription elongation factor A (SID)                             | Homo sapiens transcription elongation factor A (SID), 2 (TCEA2). transcript variant 1. mRNA [NM_003195]                               | 3.18818 | up | 2.97140 | up | 3080.45600 | 1000.47394 | 3455.08420 | 1025.32690 | Detected | Detected    | Detected    | Detected    |
| 1850 | A_24_P921683  | FOXP2        | Hs.656280 | forkhead box P2                                                     | Homo sapiens forkhead box P2 (FOXP2). transcript variant 1. mRNA [NM_014491]                                                          | 3.18684 | up | 2.63705 | up | 97.62041   | 31.71851   | 100.64842  | 33.65540   | Detected | Detected    | Detected    | Detected    |
| 1851 | A_33_P3405384 | C8orf45      | Hs.437006 | chromosome 8 open reading frame 45                                  | Homo sapiens chromosome 8 open reading frame 45 (C8orf45). transcript variant 1. mRNA [NM_173518]                                     | 3.18586 | up | 2.21039 | up | 14.78272   | 4.80463    | 9.76846    | 3.89692    | Detected | Compromised | Compromised | Compromised |
| 1852 | A_33_P3422679 | FAM149B1     | Hs.408577 | family with sequence similarity 149, member B1                      | Homo sapiens family with sequence similarity 149, member B1 (FAM149B1). mRNA [NM_173348]                                              | 3.18531 | up | 3.08314 | up | 1732.32900 | 563.13450  | 1198.33860 | 342.72983  | Detected | Detected    | Detected    | Detected    |
| 1853 | A_33_P3238533 | C18orf34     | Hs.115461 | chromosome 18 open reading frame 34                                 | Homo sapiens chromosome 18 open reading frame 34 (C18orf34). transcript variant 1. mRNA [NM_001105528]                                | 3.18268 | up | 1.99742 | up | 16.48797   | 5.36424    | 22.86861   | 10.09570   | Detected | Compromised | Detected    | Compromised |
| 1854 | A_24_P344961  | AMOT         | Hs.528051 | angiomin                                                            | Homo sapiens angiomin (AMOT). transcript variant 2. mRNA [NM_133265]                                                                  | 3.18239 | up | 3.79340 | up | 110.54550  | 35.96836   | 75.13824   | 17.46619   | Detected | Detected    | Detected    | Detected    |
| 1855 | A_24_P261259  | PFKFB3       | Hs.195471 | 6-phosphofructo-2-kinase/fructose-2,6-biphosphatase 3               | Homo sapiens 6-phosphofructo-2-kinase/fructose-2,6-biphosphatase 3 (PFKFB3). transcript variant 1. mRNA [NM_004566]                   | 3.17826 | up | 2.76253 | up | 4227.55700 | 1377.31410 | 3518.72730 | 1123.16580 | Detected | Detected    | Detected    | Detected    |
| 1856 | A_33_P3279831 | PNRC1        | Hs.75969  | proline-rich nuclear receptor coactivator 1                         | Homo sapiens proline-rich nuclear receptor coactivator 1 (PNRC1). mRNA [NM_006813]                                                    | 3.17816 | up | 3.54741 | up | 4833.97270 | 1574.92870 | 4292.03120 | 1066.88490 | Detected | Detected    | Detected    | Detected    |
| 1857 | A_24_P314597  |              |           |                                                                     | Uncharacterized protein KIAA0319-like [Source:UniProtKB/Swiss-Prot;Acc:G8EZA0] [ENST00000335883]                                      | 3.17691 | up | 2.21622 | up | 226.68571  | 73.88444   | 166.48575  | 66.24146   | Detected | Detected    | Detected    | Detected    |
| 1858 | A_33_P3294901 | SULT1A4      | Hs.460558 | sulfotransferase family, cytosolic, 1A, phenol-preferring, member 4 | Homo sapiens sulfotransferase family, cytosolic, 1A, phenol-preferring, member 4 (SULT1A4). transcript variant 1. mRNA [NM_001017389] | 3.17593 | up | 3.06160 | up | 853.39910  | 278.23703  | 981.85706  | 282.79090  | Detected | Detected    | Detected    | Detected    |
| 1859 | A_32_P132317  | GPR155       | Hs.516604 | G protein-coupled receptor 155                                      | Homo sapiens G protein-coupled receptor 155 (GPR155). transcript variant 9. mRNA [NM_001033045]                                       | 3.17493 | up | 3.01188 | up | 442.03516  | 144.16379  | 340.52194  | 99.69482   | Detected | Detected    | Detected    | Detected    |
| 1860 | A_33_P3306413 | INCA1        | Hs.658926 | inhibitor of CDK, cyclin A1 interacting protein 1                   | Homo sapiens inhibitor of CDK, cyclin A1 interacting protein 1 (INCA1). mRNA [NM_213726]                                              | 3.17366 | up | 2.26333 | up | 77.87960   | 25.40955   | 107.72173  | 41.96820   | Detected | Detected    | Detected    | Detected    |
| 1861 | A_23_P157793  | CA9          | Hs.63287  | carbonic anhydrase IX                                               | Homo sapiens carbonic anhydrase IX (CA9). mRNA [NM_001216]                                                                            | 3.17109 | up | 4.85881 | up | 56.50852   | 18.45177   | 46.69330   | 8.47404    | Detected | Detected    | Detected    | Compromised |
| 1862 | A_23_P216361  | COL14A1      | Hs.409662 | collagen, type XIV, alpha 1                                         | Homo sapiens collagen, type XIV, alpha 1 (COL14A1). mRNA [NM_021110]                                                                  | 3.17057 | up | 4.27010 | up | 27.85370   | 9.09658    | 26.13008   | 5.39596    | Detected | Compromised | Detected    | Compromised |
| 1863 | A_23_P64617   | FZD4         | Hs.591968 | frizzled homolog 4 (Drosophila)                                     | Homo sapiens frizzled homolog 4 (Drosophila) (FZD4). mRNA [NM_012183]                                                                 | 3.16831 | up | 3.25170 | up | 3876.91750 | 1267.04490 | 2830.62820 | 767.60583  | Detected | Detected    | Detected    | Detected    |
| 1864 | A_33_P329656  | RPGR         | Hs.61438  | retinitis pigmentosa GTPase regulator                               | Homo sapiens retinitis pigmentosa GTPase regulator (RPGR). transcript variant A. mRNA [NM_000328]                                     | 3.16618 | up | 3.27434 | up | 897.44760  | 293.49908  | 372.08435  | 100.20367  | Detected | Detected    | Detected    | Detected    |
| 1865 | A_33_P3222635 | XGPY2        |           | Xg pseudogene, Y-linked 2                                           | Homo sapiens Xg pseudogene, Y-linked 2 (XGPY2). non-coding RNA [NR_003254]                                                            | 3.16491 | up | 4.67914 | up | 21.75178   | 7.11650    | 14.97871   | 2.82276    | Detected | Compromised | Detected    | Compromised |
| 1866 | A_33_P3255509 | FCHO1        | Hs.96485  | FCH domain only 1                                                   | Homo sapiens FCH domain only 1 (FCHO1). transcript variant 1. mRNA [NM_001161357]                                                     | 3.16293 | up | 3.15349 | up | 2036.98400 | 666.85504  | 1496.57320 | 418.47750  | Detected | Detected    | Detected    | Detected    |
| 1867 | A_33_P3413098 | LOC100129550 | Hs.61558  | hypothetical LOC100129550                                           | Homo sapiens hypothetical LOC100129550 (LOC100129550). non-coding RNA [NR_024618]                                                     | 3.16284 | up | 3.10889 | up | 7576.69000 | 2480.47800 | 4264.29400 | 1209.50260 | Detected | Detected    | Detected    | Detected    |

|      |               |              |           |                                                                                                                      |                                                                                                                                                    |         |    |         |    |             |            |             |            |          |             |             |             |
|------|---------------|--------------|-----------|----------------------------------------------------------------------------------------------------------------------|----------------------------------------------------------------------------------------------------------------------------------------------------|---------|----|---------|----|-------------|------------|-------------|------------|----------|-------------|-------------|-------------|
| 1868 | A_33_P3237135 | MMP2         | Hs.513617 | matrix metalloproteinase 2 (gelatinase A, 72kDa gelatinase, 72kDa type IV collagenase)                               | Homo sapiens matrix metalloproteinase 2 (gelatinase A, 72kDa gelatinase, 72kDa type IV collagenase) (MMP2), transcript variant 1, mRNA [NM_004530] | 3.16127 | up | 3.00790 | up | 23241.45300 | 7612.63040 | 17475.42000 | 5123.05660 | Detected | Detected    | Detected    | Detected    |
| 1869 | A_33_P3408514 | SCNN1D       | Hs.512681 | sodium channel, nonvoltage-gated 1, delta                                                                            | Homo sapiens sodium channel, nonvoltage-gated 1, delta (SCNN1D), transcript variant 2, mRNA [NM_002978]                                            | 3.15976 | up | 2.76239 | up | 17.88340    | 5.86043    | 21.79800    | 6.95821    | Detected | Compromised | Detected    | Compromised |
| 1870 | A_33_P3235330 | MTMR3        | Hs.474536 | myotubularin related protein 3                                                                                       | Homo sapiens myotubularin related protein 3 (MTMR3), transcript variant 3, mRNA [NM_021090]                                                        | 3.15795 | up | 3.76015 | up | 825.26196   | 270.59534  | 504.27518   | 118.25720  | Detected | Detected    | Detected    | Detected    |
| 1871 | A_33_P3363485 | SOBP         | Hs.445244 | sine oculis binding protein homolog (Drosophila)                                                                     | Homo sapiens sine oculis binding protein homolog (SOBP), mRNA [NM_018013]                                                                          | 3.15180 | up | 5.52492 | up | 39.57497    | 13.00156   | 25.01229    | 3.99202    | Detected | Compromised | Detected    | Compromised |
| 1872 | A_24_P89891   | TRAF1        | Hs.531251 | TNF receptor-associated factor 1                                                                                     | Homo sapiens TNF receptor-associated factor 1 (TRAF1), mRNA [NM_005658]                                                                            | 3.14990 | up | 3.54761 | up | 299.98737   | 98.61404   | 181.89702   | 45.21218   | Detected | Detected    | Detected    | Detected    |
| 1873 | A_33_P3214988 | EFCAB1       | Hs.23245  | EF-hand calcium binding domain 1                                                                                     | Homo sapiens EF-hand calcium binding domain 1 (EFCAB1), transcript variant 2, mRNA [NM_001142857]                                                  | 3.14781 | up | 5.74003 | up | 177.49733   | 58.38709   | 138.04059   | 21.20596   | Detected | Detected    | Detected    | Detected    |
| 1874 | A_23_P412562  | C1orf162     | Hs.288010 | chromosome 1 open reading frame 162                                                                                  | Homo sapiens chromosome 1 open reading frame 162 (C1orf162), mRNA [NM_174896]                                                                      | 3.14708 | up | 2.74358 | up | 25.21941    | 8.29774    | 31.98726    | 10.28074   | Detected | Compromised | Detected    | Compromised |
| 1875 | A_33_P3301221 | LOC100129110 | Hs.642701 | hypothetical protein LOC100129110                                                                                    | Homo sapiens cDNA FLJ46574 fis, clone THYMU3041736, [AK128431]                                                                                     | 3.14608 | up | 3.45581 | up | 395.17020   | 130.06122  | 318.39996   | 81.24361   | Detected | Detected    | Detected    | Detected    |
| 1876 | A_24_P126139  | RAB9B        | Hs.522736 | RAB9B, member RAS oncogene family                                                                                    | Ras-related protein Rab-9B (Rab-9L)(RAB9-like protein) [Source:UniProtKB/Swiss-Prot;Acc:Q9NP90] [ENST00000243298]                                  | 3.14055 | up | 5.05309 | up | 41.43655    | 13.66188   | 17.73630    | 3.09508    | Detected | Compromised | Detected    | Compromised |
| 1877 | A_23_P37623   | GOLGA8A      | Hs.720151 | golgi autoantigen, golgin subfamily a, 8A                                                                            | Homo sapiens golgi autoantigen, golgin subfamily a, 8A (GOLGA8A), transcript variant 1, mRNA [NM_181077]                                           | 3.14025 | up | 3.32771 | up | 1228.10120  | 404.95163  | 694.89670   | 184.13658  | Detected | Detected    | Detected    | Detected    |
| 1878 | A_23_P85716   | FCGR2A       | Hs.352842 | Fc fragment of IgG, low affinity IIa, receptor (CD32)                                                                | Homo sapiens Fc fragment of IgG, low affinity IIa, receptor (CD32) (FCGR2A), transcript variant 2, mRNA [NM_021542]                                | 3.13698 | up | 1.60141 | up | 62.22174    | 20.53822   | 73.48319    | 40.46230   | Detected | Detected    | Detected    | Detected    |
| 1879 | A_23_P56734   | HNMT         | Hs.42151  | histamine N-methyltransferase                                                                                        | Homo sapiens histamine N-methyltransferase (HNMT), transcript variant 1, mRNA [NM_006895]                                                          | 3.13659 | up | 3.88200 | up | 427.34088   | 141.07480  | 414.78076   | 94.21686   | Detected | Detected    | Detected    | Detected    |
| 1880 | A_23_P60259   | TMEM38B      | Hs.411925 | transmembrane protein 38B                                                                                            | Homo sapiens transmembrane protein 38B (TMEM38B), mRNA [NM_018112]                                                                                 | 3.13619 | up | 3.51590 | up | 2997.45700  | 989.65430  | 2365.52370  | 593.27484  | Detected | Detected    | Detected    | Detected    |
| 1881 | A_33_P3383029 | MXI1         | Hs.501023 | MAX interactor 1                                                                                                     | Homo sapiens MAX interactor 1 (MXI1), transcript variant 2, mRNA [NM_130439]                                                                       | 3.13593 | up | 3.23566 | up | 534.98706   | 176.64840  | 539.31830   | 146.97638  | Detected | Detected    | Detected    | Detected    |
| 1882 | A_23_P208334  | PDE4A        | Hs.89901  | phosphodiesterase 4A, cAMP-specific (phosphodiesterase E2 dunce homolog, Drosophila)                                 | Homo sapiens phosphodiesterase 4A, cAMP-specific (phosphodiesterase E2 dunce homolog, Drosophila) (PDE4A), transcript variant 4, mRNA [NM_006202]  | 3.13344 | up | 2.85476 | up | 155.30626   | 51.32163   | 171.96982   | 53.11884   | Detected | Detected    | Detected    | Detected    |
| 1883 | A_23_P344568  | FAM124A      | Hs.71913  | family with sequence similarity 124A                                                                                 | Homo sapiens family with sequence similarity 124A (FAM124A), mRNA [NM_145019]                                                                      | 3.13284 | up | 2.15314 | up | 52.94270    | 17.49849   | 40.19567    | 16.46163   | Detected | Compromised | Detected    | Detected    |
| 1884 | A_23_P408675  | BTAF1        | Hs.500526 | BTAF1 RNA polymerase II, B-TFIID transcription factor-associated, 170kDa (Mot1 homolog, S. cerevisiae) (BTAF1), mRNA | Homo sapiens BTAF1 RNA polymerase II, B-TFIID transcription factor-associated, 170kDa (Mot1 homolog, S. cerevisiae) (BTAF1), mRNA [NM_003972]      | 3.13265 | up | 3.33716 | up | 924.36370   | 305.53738  | 933.43176   | 246.64421  | Detected | Detected    | Detected    | Detected    |
| 1885 | A_33_P3762918 | LOC100216546 | Hs.369356 | hypothetical LOC100216546                                                                                            | Homo sapiens cDNA FLJ41601 fis, clone CTONG2027327 [AK123595]                                                                                      | 3.13150 | up | 3.21297 | up | 2685.75220  | 888.06840  | 1694.06620  | 464.93207  | Detected | Detected    | Detected    | Detected    |
| 1886 | A_23_P144096  | CISH         | Hs.655334 | cytokine inducible SH2-containing protein                                                                            | Homo sapiens cytokine inducible SH2-containing protein (CISH), transcript variant 2, mRNA [NM_145071]                                              | 3.13141 | up | 3.93848 | up | 611.42670   | 202.17950  | 372.81656   | 83.47033   | Detected | Detected    | Detected    | Detected    |
| 1887 | A_33_P3408337 | C14orf45     | Hs.644621 | chromosome 14 open reading frame 45                                                                                  | Homo sapiens chromosome 14 open reading frame 45 (C14orf45), mRNA [NM_025057]                                                                      | 3.12996 | up | 2.55546 | up | 117.78099   | 38.96448   | 114.56307   | 39.53124   | Detected | Detected    | Detected    | Detected    |
| 1888 | A_23_P75800   | RAB3L1       | Hs.13759  | RAB3A interacting protein (rabin3)-like 1                                                                            | Homo sapiens RAB3A interacting protein (rabin3)-like 1 (RAB3L1), mRNA [NM_013401]                                                                  | 3.12996 | up | 2.78527 | up | 648.67303   | 214.59497  | 803.25195   | 254.30240  | Detected | Detected    | Detected    | Detected    |
| 1889 | A_33_P3224307 | SCARNA12     | Hs.689636 | small Cajal body-specific RNA 12                                                                                     | Homo sapiens small Cajal body-specific RNA 12 (SCARNA12), guide RNA [NR_003010]                                                                    | 3.12958 | up | 2.82364 | up | 859.88800   | 284.50446  | 787.28845   | 245.86115  | Detected | Detected    | Detected    | Detected    |
| 1890 | A_33_P3217609 |              | Hs.435044 |                                                                                                                      | TBC1 domain family member 22A [Source:UniProtKB/Swiss-Prot;Acc:Q8WUA7] [ENST00000380995]                                                           | 3.12823 | up | 2.99467 | up | 91.85586    | 30.40470   | 73.24652    | 21.56771   | Detected | Detected    | Detected    | Detected    |
| 1891 | A_23_P217428  | ARHGAP6      | Hs.435291 | Rho GTPase activating protein 6                                                                                      | Homo sapiens Rho GTPase activating protein 6 (ARHGAP6), transcript variant 1, mRNA [NM_013427]                                                     | 3.12746 | up | 4.61496 | up | 193.71094   | 64.13506   | 100.44762   | 19.19276   | Detected | Detected    | Detected    | Detected    |
| 1892 | A_33_P3390823 |              |           |                                                                                                                      |                                                                                                                                                    | 3.12719 | up | 2.34970 | up | 2317.59300  | 767.38970  | 1903.72630  | 714.42535  | Detected | Detected    | Detected    | Detected    |
| 1893 | A_23_P67785   | SPAG16       | Hs.602792 | sperm associated antigen 16                                                                                          | Homo sapiens sperm associated antigen 16 (SPAG16), transcript variant 2, mRNA [NM_001025436]                                                       | 3.12511 | up | 3.40848 | up | 839.14770   | 278.03918  | 828.13916   | 214.24380  | Detected | Detected    | Detected    | Detected    |
| 1894 | A_33_P3326713 | FAM188B      | Hs.660192 | family with sequence similarity 188, member B                                                                        | Homo sapiens family with sequence similarity 188, member B (FAM188B), mRNA [NM_032222]                                                             | 3.12495 | up | 2.75080 | up | 180.31573   | 59.74796   | 119.33266   | 38.25306   | Detected | Detected    | Detected    | Detected    |
| 1895 | A_33_P3307363 | LPHN2        | Hs.24212  | latrophilin 2                                                                                                        | Homo sapiens latrophilin 2 (LPHN2), mRNA [NM_012302]                                                                                               | 3.12357 | up | 3.10102 | up | 3728.10380  | 1235.86060 | 2523.89720  | 717.68335  | Detected | Detected    | Detected    | Detected    |
| 1896 | A_23_P203115  | TMEM25       | Hs.564188 | transmembrane protein 25                                                                                             | Homo sapiens transmembrane protein 25 (TMEM25), transcript variant 1, mRNA [NM_032780]                                                             | 3.11875 | up | 2.97520 | up | 1422.11150  | 472.15656  | 1182.72740  | 350.53668  | Detected | Detected    | Detected    | Detected    |
| 1897 | A_33_P3342802 | LOC649294    | Hs.588395 | hypothetical LOC649294                                                                                               | Homo sapiens cDNA FLJ33940 fis, clone CTONG2018069 [AK091259]                                                                                      | 3.11873 | up | 1.62306 | up | 21.87080    | 7.26140    | 6.50987     | 3.53674    | Detected | Compromised | Compromised | Compromised |

|      |               |               |           |                                                                         |                                                                                                                                      |         |    |          |    |              |             |             |             |          |             |             |             |
|------|---------------|---------------|-----------|-------------------------------------------------------------------------|--------------------------------------------------------------------------------------------------------------------------------------|---------|----|----------|----|--------------|-------------|-------------|-------------|----------|-------------|-------------|-------------|
| 1898 | A_23_P160567  | ZMYND12       | Hs.294009 | zinc finger, MYND-type containing 12                                    | Homo sapiens zinc finger, MYND-type containing 12 (ZMYND12), transcript variant 1, mRNA [NM_032257]                                  | 3.11831 | up | 3.28305  | up | 26.71981     | 8.87254     | 27.62315    | 7.41927     | Detected | Compromised | Detected    | Compromised |
| 1899 | A_33_P3407746 | PPM1B         | Hs.416769 | protein phosphatase 1B (formerly 2C), magnesium-dependent, beta isoform | Homo sapiens protein phosphatase 1B (formerly 2C), magnesium-dependent, beta isoform (PPM1B), transcript variant 2, mRNA [NM_177868] | 3.11657 | up | 1.94805  | up | 17.91791     | 5.95311     | 11.92083    | 5.39601     | Detected | Compromised | Compromised | Compromised |
| 1900 | A_33_P3257187 | PRKAA1        | Hs.43322  | protein kinase, AMP-activated, alpha 1 catalytic subunit                | Homo sapiens protein kinase, AMP-activated, alpha 1 catalytic subunit (PRKAA1), transcript variant 2, mRNA [NM_206907]               | 3.11414 | up | 3.39111  | up | 1046.12800   | 347.84064   | 661.96720   | 172.13160   | Detected | Detected    | Detected    | Detected    |
| 1901 | A_23_P90099   | TMEM205       | Hs.8036   | transmembrane protein 205                                               | Homo sapiens transmembrane protein 205 (TMEM205), transcript variant 1, mRNA [NM_198536]                                             | 3.11371 | up | 3.05882  | up | 47074.19500  | 15654.46000 | 50075.70000 | 14435.72700 | Detected | Detected    | Detected    | Detected    |
| 1902 | A_33_P3260733 | GHR           | Hs.125180 | growth hormone receptor                                                 | Homo sapiens growth hormone receptor (GHR), mRNA [NM_000163]                                                                         | 3.11368 | up | 1.96998  | up | 29.98511     | 9.97161     | 21.49529    | 9.62162     | Detected | Compromised | Detected    | Compromised |
| 1903 | A_23_P309207  | ZNF577        | Hs.148322 | zinc finger protein 577                                                 | Homo sapiens zinc finger protein 577 (ZNF577), transcript variant 1, mRNA [NM_032879]                                                | 3.11307 | up | 3.44411  | up | 295.31113    | 98.22547    | 160.04716   | 40.97667    | Detected | Detected    | Detected    | Detected    |
| 1904 | A_33_P3221960 | IL18RAP       | Hs.158315 | interleukin 18 receptor accessory protein                               | Homo sapiens interleukin 18 receptor accessory protein (IL18RAP), mRNA [NM_003853]                                                   | 3.11252 | up | 12.43740 | up | 1680.15580   | 558.94635   | 689.36346   | 48.87470    | Detected | Detected    | Detected    | Detected    |
| 1905 | A_23_P79931   | ATRN          | Hs.276252 | atractin                                                                | Homo sapiens attractin (ATRN), transcript variant 2, mRNA [NM_139322]                                                                | 3.11189 | up | 2.84631  | up | 5378.37200   | 1789.61820  | 5075.10940  | 1572.27420  | Detected | Detected    | Detected    | Detected    |
| 1906 | A_33_P3318696 | COBL2         | Hs.481898 | cysteine conjugate-beta lyase 2                                         | Homo sapiens cysteine conjugate-beta lyase 2 (COBL2), transcript variant 1, mRNA [NM_001008661]                                      | 3.10756 | up | 3.53023  | up | 1345.83180   | 448.43970   | 1063.09390  | 265.54290   | Detected | Detected    | Detected    | Detected    |
| 1907 | A_23_P257003  | PCSK5         | Hs.368542 | proprotein convertase subtilisin/kexin type 5                           | Homo sapiens proprotein convertase subtilisin/kexin type 5 (PCSK5), mRNA [NM_009200]                                                 | 3.10711 | up | 3.15117  | up | 3113.60700   | 1037.62380  | 2368.50600  | 662.77856   | Detected | Detected    | Detected    | Detected    |
| 1908 | A_24_P252364  | NRCAM         | Hs.21422  | neuronal cell adhesion molecule                                         | Homo sapiens neuronal cell adhesion molecule (NRCAM), transcript variant 1, mRNA [NM_001037132]                                      | 3.10625 | up | 3.03230  | up | 2559.17260   | 853.09230   | 1556.44530  | 452.61325   | Detected | Detected    | Detected    | Detected    |
| 1909 | A_23_P126836  | TNFSF4        | Hs.181097 | tumor necrosis factor (ligand) superfamily, member 4                    | Homo sapiens tumor necrosis factor (ligand) superfamily, member 4 (TNFSF4), mRNA [NM_003326]                                         | 3.10589 | up | 3.38855  | up | 87.57895     | 29.19755    | 50.33538    | 13.09862    | Detected | Detected    | Detected    | Compromised |
| 1910 | A_23_P343261  | C1orf211      | Hs.185688 | chromosome 1 open reading frame 211                                     | Homo sapiens chromosome 1 open reading frame 211, mRNA (cDNA clone MGC-40168 IMAGE5141008), complete cds [BC039279]                  | 3.10345 | up | 3.65721  | up | 105.40451    | 35.16799    | 142.92451   | 34.46053    | Detected | Detected    | Detected    | Detected    |
| 1911 | A_24_P541919  | DENND5B       | Hs.118166 | DENN/MADD domain containing 5B                                          | Homo sapiens DENN/MADD domain containing 5B (DENND5B), mRNA [NM_144973]                                                              | 3.10040 | up | 3.17076  | up | 760.80920    | 254.02534   | 527.85670   | 146.79733   | Detected | Detected    | Detected    | Detected    |
| 1912 | A_33_P3230594 |               |           | GB                                                                      |                                                                                                                                      | 3.09829 | up | 3.61667  | up | 868.46870    | 290.24560   | 547.20870   | 133.41669   | Detected | Detected    | Detected    | Detected    |
| 1913 | A_23_P403424  | JMJD7-PLA2G4B | Hs.198161 | JMJD7-PLA2G4B readthrough transcript                                    | Homo sapiens JMJD7-PLA2G4B readthrough transcript (JMJD7-PLA2G4B), transcript variant 1, mRNA [NM_005090]                            | 3.09802 | up | 3.51634  | up | 1220.54770   | 407.94740   | 1173.06000  | 294.16785   | Detected | Detected    | Detected    | Detected    |
| 1914 | A_24_P409126  | FNDC3A        | Hs.508010 | fibronectin type III domain containing 3A                               | Homo sapiens cDNA FLJ31509 fis, clone NT2R1000016, [AK056071]                                                                        | 3.09766 | up | 6.04483  | up | 39.30961     | 13.14010    | 21.45673    | 3.13000     | Detected | Compromised | Detected    | Compromised |
| 1915 | A_23_P118615  | ABCA8         | Hs.58351  | ATP-binding cassette, sub-family A (ABC1), member 8                     | Homo sapiens ATP-binding cassette, sub-family A (ABC1), member 8 (ABCA8), mRNA [NM_007168]                                           | 3.09634 | up | 2.14435  | up | 65.97136     | 22.06179    | 66.81093    | 27.47368    | Detected | Detected    | Detected    | Detected    |
| 1916 | A_24_P379820  | ITM2C         | Hs.111577 | integral membrane protein 2C                                            | Homo sapiens integral membrane protein 2C (ITM2C), transcript variant 1, mRNA [NM_030926]                                            | 3.09436 | up | 2.10207  | up | 4030.14200   | 1348.59690  | 4211.08740  | 1766.49800  | Detected | Detected    | Detected    | Detected    |
| 1917 | A_23_P81973   | HSD17B8       | Hs.415058 | hydroxysteroid (17-beta) dehydrogenase 8                                | Homo sapiens hydroxysteroid (17-beta) dehydrogenase 8 (HSD17B8), mRNA [NM_014234]                                                    | 3.09401 | up | 3.39091  | up | 448.73563    | 150.17627   | 512.92040   | 133.38261   | Detected | Detected    | Detected    | Detected    |
| 1918 | A_33_P3269636 | SBSN          | Hs.433484 | suprabasin                                                              | Homo sapiens suprabasin (SBSN), transcript variant 1, mRNA [NM_001166034]                                                            | 3.09319 | up | 2.72999  | up | 25099.49600  | 8402.18400  | 20362.87900 | 6577.24460  | Detected | Detected    | Detected    | Detected    |
| 1919 | A_33_P3424800 | HLA-B         | Hs.77961  | major histocompatibility complex, class I, B                            | Homo sapiens major histocompatibility complex, class I B (HLA-B), mRNA [NM_005514]                                                   | 3.09248 | up | 2.53489  | up | 159327.45000 | 53347.90600 | 55503.57000 | 19307.57400 | Detected | Detected    | Detected    | Detected    |
| 1920 | A_33_P3326225 | SAMD12        | Hs.359393 | sterile alpha motif domain containing 12                                | Homo sapiens sterile alpha motif domain containing 12 (SAMD12), transcript variant 1, mRNA [NM_001101676]                            | 3.08890 | up | 4.50178  | up | 32.08853     | 10.75671    | 26.68708    | 5.22736     | Detected | Compromised | Detected    | Compromised |
| 1921 | A_33_P3390778 | TRIM46        | Hs.287735 | tripartite motif-containing 46                                          | Homo sapiens tripartite motif-containing 46 (TRIM46), mRNA [NM_025058]                                                               | 3.08631 | up | 3.13705  | up | 396.77448    | 133.11818   | 370.97623   | 104.27741   | Detected | Detected    | Detected    | Detected    |
| 1922 | A_23_P78980   | B3GNT3        | Hs.69009  | UDP-GlcNAc:betaGal beta-1,3-N-acetylglucosaminyltransferase 3           | Homo sapiens UDP-GlcNAc:betaGal beta-1,3-N-acetylglucosaminyltransferase 3 (B3GNT3), mRNA [NM_014258]                                | 3.08402 | up | 7.82021  | up | 149.43481    | 50.17279    | 127.58443   | 14.38616    | Detected | Detected    | Detected    | Compromised |
| 1923 | A_23_P377141  | VPS13A        | Hs.459790 | vacuolar protein sorting 13 homolog A (S. cerevisiae)                   | Homo sapiens vacuolar protein sorting 13 homolog A (S. cerevisiae) (VPS13A), transcript variant B, mRNA [NM_015186]                  | 3.08204 | up | 2.92573  | up | 339.35254    | 114.01082   | 156.21278   | 47.08122    | Detected | Detected    | Detected    | Detected    |
| 1924 | A_24_P235783  | SF1           | Hs.502829 | splicing factor 1                                                       | Homo sapiens splicing factor 1 (SF1), transcript variant 4, mRNA [NM_201997]                                                         | 3.08179 | up | 3.22868  | up | 84.96043     | 28.54606    | 54.26468    | 14.82034    | Detected | Detected    | Detected    | Detected    |
| 1925 | A_33_P3211929 | RCOR2         | Hs.98788  | REST corepressor 2                                                      | Homo sapiens REST corepressor 2 (RCOR2), mRNA [NM_173587]                                                                            | 3.08084 | up | 2.89297  | up | 2262.04470   | 760.26434   | 1265.19950  | 385.63880   | Detected | Detected    | Detected    | Detected    |
| 1926 | A_33_P3665553 | FLJ44253      | Hs.595418 | hypothetical gene supported by AK096952; AK126241; BC068588             | Homo sapiens cDNA FLJ44253 fis, clone TKIDN2009092 [AK126241]                                                                        | 3.07994 | up | 5.51299  | up | 47.49411     | 15.96725    | 29.68865    | 4.74835     | Detected | Compromised | Detected    | Compromised |
| 1927 | A_23_P54918   | LDHD          | Hs.380929 | lactate dehydrogenase D                                                 | Homo sapiens lactate dehydrogenase D (LDHD), nuclear gene encoding mitochondrial protein, transcript variant 1, mRNA [NM_153486]     | 3.07794 | up | 3.29567  | up | 52.11274     | 17.53140    | 49.97242    | 13.37062    | Detected | Compromised | Detected    | Compromised |



|      |               |           |           |                                                                                        |                                                                                                                                                      |         |    |         |            |            |            |            |          |              |          |             |
|------|---------------|-----------|-----------|----------------------------------------------------------------------------------------|------------------------------------------------------------------------------------------------------------------------------------------------------|---------|----|---------|------------|------------|------------|------------|----------|--------------|----------|-------------|
| 1928 | A_33_P3340490 | FLJ46906  | Hs.92290  | hypothetical protein LOC441172                                                         | PREDICTED: Homo sapiens hypothetical protein LOC441172 (FLJ46906), mRNA [XM_001717237]                                                               | 3.07553 | up | 3.31028 | 1584.79680 | 533.56445  | 1720.54000 | 458.31620  | Detected | Detected     | Detected | Detected    |
| 1929 | A_23_P307536  | C1orf113  | Hs.524496 | chromosome 1 open reading frame 113                                                    | SH3 domain-containing protein C1orf113 [Source:UniProtKB/Swiss-Prot;Acc:A4FU49] [ENST00000453908]                                                    | 3.07436 | up | 3.25304 | 279.54670  | 94.15263   | 189.11418  | 51.26257   | Detected | Detected     | Detected | Detected    |
| 1930 | A_23_P132718  | SEMA3B    | Hs.82222  | sema domain, immunoglobulin domain (Ig), short basic domain, secreted, (semaphorin) 3B | Homo sapiens sema domain, immunoglobulin domain (Ig), short basic domain, secreted, (semaphorin) 3B (SEMA3B), transcript variant 1, mRNA [NM_004636] | 3.07431 | up | 3.08225 | 1335.92570 | 449.95407  | 1290.79610 | 369.27994  | Detected | Detected     | Detected | Detected    |
| 1931 | A_24_P943193  | PREPL     | Hs.444349 | prolyl endopeptidase-like                                                              | Homo sapiens prolyl endopeptidase-like (PREPL), transcript variant C, mRNA [NM_006036]                                                               | 3.07430 | up | 3.41274 | 1423.68690 | 479.51392  | 747.68835  | 193.18945  | Detected | Detected     | Detected | Detected    |
| 1932 | A_33_P3289296 | TMEM37    | Hs.26216  | transmembrane protein 37                                                               | Homo sapiens transmembrane protein 37 (TMEM37), mRNA [NM_183240]                                                                                     | 3.07377 | up | 6.22575 | 196.58163  | 66.22242   | 140.02962  | 19.83323   | Detected | Detected     | Detected | Detected    |
| 1933 | A_24_P137522  | USP53     | Hs.431081 | ubiquitin specific peptidase 53                                                        | Homo sapiens ubiquitin specific peptidase 53 (USP53), mRNA [NM_019050]                                                                               | 3.07296 | up | 3.11116 | 1197.33700 | 403.45297  | 1145.90860 | 324.78256  | Detected | Detected     | Detected | Detected    |
| 1934 | A_23_P74278   | PDE4B     | Hs.198072 | phosphodiesterase 4B, cAMP-specific (phosphodiesterase E4 dunce homolog, Drosophila)   | Homo sapiens phosphodiesterase 4B, cAMP-specific (phosphodiesterase E4 dunce homolog, Drosophila) (PDE4B), transcript variant d, mRNA [NM_001037341] | 3.07171 | up | 3.13935 | 2477.39900 | 835.11860  | 2080.30760 | 584.32416  | Detected | Detected     | Detected | Detected    |
| 1935 | A_33_P3309414 | LOC643770 | Hs.129589 | hypothetical LOC643770                                                                 | Homo sapiens cDNA FLJ44867 fis, clone BRALZ2017607 [AK126817]                                                                                        | 3.07019 | up | 3.03724 | 23.86752   | 8.04962    | 16.72893   | 4.85684    | Detected | Compromised  | Detected | Compromised |
| 1936 | A_24_P93703   | LOC440104 | Hs.616500 | hypothetical LOC440104                                                                 | Homo sapiens cDNA FLJ32617 fis, clone STOMA2000237, [AK057179]                                                                                       | 3.07015 | up | 3.09807 | 1645.30820 | 554.90810  | 1609.28330 | 458.04422  | Detected | Detected     | Detected | Detected    |
| 1937 | A_23_P151529  | C14orf132 | Hs.6434   | chromosome 14 open reading frame 132                                                   | Homo sapiens chromosome 14 open reading frame 132 (C14orf132), non-coding RNA [NR_023938]                                                            | 3.06968 | up | 2.84417 | 3387.01050 | 1142.49960 | 2517.54030 | 780.52510  | Detected | Detected     | Detected | Detected    |
| 1938 | A_24_P540057  | CASA      | Hs.177446 | carbonic anhydrase VA, mitochondrial                                                   | Homo sapiens carbonic anhydrase VA, mitochondrial (CASA), nuclear gene encoding mitochondrial protein, mRNA [NM_001739]                              | 3.06934 | up | 2.44985 | 52.43564   | 17.68948   | 57.16416   | 20.57550   | Detected | Detected     | Detected | Detected    |
| 1939 | A_24_P63019   | IL1R2     | Hs.25333  | interleukin 1 receptor, type II                                                        | Homo sapiens interleukin 1 receptor, type II (IL1R2), transcript variant 1, mRNA [NM_004633]                                                         | 3.06924 | up | 2.16310 | 53.48637   | 18.04451   | 26.17889   | 10.67185   | Detected | Compromised  | Detected | Compromised |
| 1940 | A_33_P3323842 | BDNFOS    | Hs.675323 | BDNF opposite strand (non-protein coding)                                              | Homo sapiens BDNF opposite strand (non-protein coding) (BDNFOS), non-coding RNA [NR_002832]                                                          | 3.06885 | up | 3.78847 | 286.20914  | 96.56967   | 154.44821  | 35.94885   | Detected | Detected     | Detected | Detected    |
| 1941 | A_23_P110412  | TMEM150C  | Hs.720835 | transmembrane protein 150C                                                             | Homo sapiens transmembrane protein 150C (TMEM150C), mRNA [NM_001080506]                                                                              | 3.06618 | up | 5.74081 | 68.57480   | 23.15794   | 55.91653   | 8.58880    | Detected | Not Detected | Detected | Compromised |
| 1942 | A_23_P357966  | PCMTD1    | Hs.671268 | protein-L-isoaspartate (D-aspartate) O-methyltransferase domain containing 1           | Homo sapiens protein-L-isoaspartate (D-aspartate) O-methyltransferase domain containing 1 (PCMTD1), mRNA [NM_052937]                                 | 3.06020 | up | 3.32597 | 285.84875  | 96.72089   | 28.82434   | 7.64200    | Detected | Detected     | Detected | Compromised |
| 1943 | A_23_P161686  | RICS      | Hs.440379 | Rho GTPase-activating protein                                                          | Homo sapiens Rho GTPase-activating protein (RICS), transcript variant 2, mRNA [NM_014715]                                                            | 3.05630 | up | 3.76163 | 380.65897  | 128.96529  | 255.25388  | 59.83596   | Detected | Detected     | Detected | Detected    |
| 1944 | A_33_P3676515 | C21orf122 | Hs.309203 | chromosome 21 open reading frame 122                                                   | Homo sapiens chromosome 21 open reading frame 122 (C21orf122), non-coding RNA [NR_027292]                                                            | 3.05575 | up | 2.63242 | 984.71893  | 333.67800  | 696.38110  | 233.26941  | Detected | Detected     | Detected | Detected    |
| 1945 | A_23_P85952   | DENN2D    | Hs.557850 | DENN/MADD domain containing 2D                                                         | Homo sapiens DENN/MADD domain containing 2D (DENN2D), mRNA [NM_024901]                                                                               | 3.05549 | up | 2.58870 | 237.78024  | 80.58021   | 185.11035  | 63.05417   | Detected | Detected     | Detected | Detected    |
| 1946 | A_33_P3342663 | ADAM33    | Hs.173716 | ADAM metallopeptidase domain 33                                                        | Homo sapiens ADAM metallopeptidase domain 33 (ADAM33), transcript variant 2, mRNA [NM_153202]                                                        | 3.05537 | up | 2.37439 | 80.84690   | 27.39890   | 74.99921   | 27.85285   | Detected | Detected     | Detected | Detected    |
| 1947 | A_23_P200710  | PIK3C2B   | Hs.497487 | phosphoinositide-3-kinase, class 2, beta polypeptide                                   | Homo sapiens phosphoinositide-3-kinase, class 2, beta polypeptide (PIK3C2B), mRNA [NM_002646]                                                        | 3.05523 | up | 3.83427 | 60.94561   | 20.65533   | 50.10544   | 11.52305   | Detected | Detected     | Detected | Compromised |
| 1948 | A_33_P3317618 | SYN2      | Hs.445503 | synapsin II                                                                            | Homo sapiens synapsin II (SYN2), transcript variant 1b, mRNA [NM_003178]                                                                             | 3.05502 | up | 3.12982 | 113.04173  | 38.31403   | 74.20045   | 20.90509   | Detected | Detected     | Detected | Detected    |
| 1949 | A_32_P430695  | C3orf35   | Hs.475945 | chromosome 3 open reading frame 35                                                     | Homo sapiens chromosome 3 open reading frame 35 (C3orf35), transcript variant B, mRNA [NM_178339]                                                    | 3.05315 | up | 4.60254 | 67.93494   | 23.03980   | 48.45763   | 9.28389    | Detected | Detected     | Detected | Compromised |
| 1950 | A_23_P153676  | TLE2      | Hs.332173 | transducin-like enhancer of split 2 (E(sp1) homolog, Drosophila)                       | Homo sapiens transducin-like enhancer of split 2 (E(sp1) homolog, Drosophila) (TLE2), transcript variant 1, mRNA [NM_003260]                         | 3.05304 | up | 2.96488 | 645.62850  | 218.96901  | 633.44830  | 188.39542  | Detected | Detected     | Detected | Detected    |
| 1951 | A_33_P3407529 | PRRT4     | Hs.381096 | proline-rich transmembrane protein 4                                                   | Homo sapiens proline-rich transmembrane protein 4 (PRRT4), mRNA [NM_001114726]                                                                       | 3.05128 | up | 3.76249 | 63.65750   | 21.60231   | 45.81823   | 10.73814   | Detected | Detected     | Detected | Compromised |
| 1952 | A_33_P3389766 | C17orf96  | Hs.445574 | chromosome 17 open reading frame 96                                                    | Homo sapiens chromosome 17 open reading frame 96 (C17orf96), mRNA [NM_001130677]                                                                     | 3.05124 | up | 3.19321 | 8132.76700 | 2759.91020 | 6416.18950 | 1771.80270 | Detected | Detected     | Detected | Detected    |
| 1953 | A_33_P3327822 | SH3BGR    | Hs.473847 | SH3 domain binding glutamic acid-rich protein                                          | Homo sapiens SH3 domain binding glutamic acid-rich protein (SH3BGR), transcript variant 1, mRNA [NM_007341]                                          | 3.05068 | up | 3.00459 | 421.20980  | 142.96670  | 443.56952  | 130.17944  | Detected | Detected     | Detected | Detected    |
| 1954 | A_33_P3330443 | FAM110B   | Hs.154652 | family with sequence similarity 110, member B                                          | Homo sapiens family with sequence similarity 110, member B (FAM110B), mRNA [NM_147189]                                                               | 3.04690 | up | 3.59160 | 606.44620  | 206.09460  | 406.22354  | 99.73395   | Detected | Detected     | Detected | Detected    |
| 1955 | A_24_P380679  | C7orf53   | Hs.396189 | chromosome 7 open reading frame 53                                                     | Homo sapiens chromosome 7 open reading frame 53 (C7orf53), transcript variant 1, mRNA [NM_182597]                                                    | 3.04634 | up | 3.22839 | 295.29608  | 100.37212  | 218.04488  | 59.55600   | Detected | Detected     | Detected | Detected    |
| 1956 | A_23_P85180   | TMEM187   | Hs.23119  | transmembrane protein 187                                                              | Homo sapiens transmembrane protein 187 (TMEM187), mRNA [NM_003492]                                                                                   | 3.04620 | up | 3.00097 | 2192.94780 | 745.42220  | 1148.21600 | 337.38623  | Detected | Detected     | Detected | Detected    |

|      |               |              |           |                                                                                  |                                                                                                                                                                                                       |         |    |         |    |             |            |             |            |             |             |          |             |
|------|---------------|--------------|-----------|----------------------------------------------------------------------------------|-------------------------------------------------------------------------------------------------------------------------------------------------------------------------------------------------------|---------|----|---------|----|-------------|------------|-------------|------------|-------------|-------------|----------|-------------|
| 1957 | A_33_P3275873 | SFTPB        | Hs.512690 | surfactant protein B                                                             | Homo sapiens surfactant protein B (SFTPB), transcript variant 2, mRNA [NM_188843]                                                                                                                     | 3.04618 | up | 4.23378 | up | 11.17468    | 3.79850    | 15.54381    | 3.23739    | Compromised | Compromised | Detected | Compromised |
| 1958 | A_23_P359897  | JHDM1D       | Hs.308710 | jumonji C domain containing histone demethylase 1 homolog D (S. cerevisiae)      | Homo sapiens jumonji C domain containing histone demethylase 1 homolog D (S. cerevisiae) (JHDM1D), mRNA [NM_030647]                                                                                   | 3.04476 | up | 2.98343 | up | 1511.70030  | 514.09863  | 1446.97490  | 427.67123  | Detected    | Detected    | Detected | Detected    |
| 1959 | A_33_P3377239 | LOC100270804 | Hs.598768 | hypothetical LOC100270804                                                        | Homo sapiens hypothetical LOC100270804 (LOC100270804), non-coding RNA [NR_026885]                                                                                                                     | 3.04325 | up | 3.35414 | up | 342.58307   | 116.56322  | 321.20905   | 84.44455   | Detected    | Detected    | Detected | Detected    |
| 1960 | A_24_P148094  | LEPROT       | Hs.23581  | leptin receptor overlapping transcript                                           | Homo sapiens leptin receptor overlapping transcript (LEPROT), mRNA [NM_017526]                                                                                                                        | 3.04201 | up | 3.39559 | up | 5808.13600  | 1977.00980 | 3804.80350  | 988.05740  | Detected    | Detected    | Detected | Detected    |
| 1961 | A_32_P141969  | NTRK3        | Hs.185701 | neurotrophic tyrosine kinase, receptor, type 3                                   | NT-3 growth factor receptor Precursor (EC 2.7.10.1)(Neurotrophic tyrosine kinase receptor type 3)(TrkC tyrosine kinase)(GP145-TrkC)(Trk-C) [Source:UniProtKB/Swiss-Prot;Acc:Q16286] [ENST00000394480] | 3.04195 | up | 2.90889 | up | 20.53707    | 6.99068    | 17.46781    | 5.29513    | Detected    | Compromised | Detected | Compromised |
| 1962 | A_33_P3266889 |              |           |                                                                                  |                                                                                                                                                                                                       | 3.04060 | up | 3.27378 | up | 366.57760   | 124.83607  | 120.72449   | 32.51704   | Detected    | Detected    | Detected | Detected    |
| 1963 | A_24_P194881  | SHANK3       | Hs.149035 | SH3 and multiple ankyrin repeat domains 3                                        | Homo sapiens SH3 and multiple ankyrin repeat domains 3 (SHANK3), mRNA [NM_001080420]                                                                                                                  | 3.04060 | up | 2.84426 | up | 1950.59170  | 664.26416  | 1894.82500  | 587.44226  | Detected    | Detected    | Detected | Detected    |
| 1964 | A_23_P114740  | CFH          | Hs.363396 | complement factor H                                                              | Homo sapiens complement factor H (CFH), transcript variant 1, mRNA [NM_000186]                                                                                                                        | 3.03943 | up | 2.86996 | up | 5491.11000  | 1870.68550 | 4243.48830  | 1303.80350 | Detected    | Detected    | Detected | Detected    |
| 1965 | A_24_P127075  | TMEM135      | Hs.188591 | transmembrane protein 135                                                        | Homo sapiens transmembrane protein 135 (TMEM135), mRNA [NM_029181]                                                                                                                                    | 3.03699 | up | 2.54811 | up | 35.41678    | 12.07530   | 21.68153    | 7.50305    | Detected    | Compromised | Detected | Compromised |
| 1966 | A_23_P372467  | AHSA2        | Hs.655602 | AHA1, activator of heat shock 90kDa protein ATPase homolog 2 (yeast)             | Homo sapiens AHA1, activator of heat shock 90kDa protein ATPase homolog 2 (yeast) (AHSA2), mRNA [NM_152392]                                                                                           | 3.03553 | up | 3.03152 | up | 5222.73140  | 1781.54480 | 4575.80270  | 1330.98340 | Detected    | Detected    | Detected | Detected    |
| 1967 | A_23_P143147  | TCFL5        | Hs.126248 | transcription factor-like 5 (basic helix-loop-helix)                             | Homo sapiens transcription factor-like 5 (basic helix-loop-helix) (TCFL5), mRNA [NM_006602]                                                                                                           | 3.03498 | up | 3.06983 | up | 4070.68380  | 1388.81450 | 2600.19700  | 746.89056  | Detected    | Detected    | Detected | Detected    |
| 1968 | A_33_P3351027 | PXMP3        | Hs.437966 | peroxisomal membrane protein 3, 35kDa                                            | Homo sapiens peroxisomal membrane protein 3, 35kDa (PXMP3), transcript variant 1, mRNA [NM_000318]                                                                                                    | 3.03109 | up | 6.38722 | up | 75.50127    | 25.79222   | 60.17407    | 8.30736    | Detected    | Detected    | Detected | Compromised |
| 1969 | A_24_P153456  | ZDHC11       | Hs.654874 | zinc finger, DHHC-type containing 11                                             | Homo sapiens zinc finger, DHHC-type containing 11 (ZDHC11), mRNA [NM_024786]                                                                                                                          | 3.03080 | up | 2.62518 | up | 101.79839   | 34.77900   | 99.72676    | 33.49789   | Detected    | Detected    | Detected | Detected    |
| 1970 | A_24_P382026  | MIF4GD       | Hs.325631 | MIF4G domain containing                                                          | Homo sapiens MIF4G domain containing (MIF4GD), mRNA [NM_020679]                                                                                                                                       | 3.02841 | up | 2.50107 | up | 492.82187   | 168.50314  | 572.13983   | 201.71667  | Detected    | Detected    | Detected | Detected    |
| 1971 | A_33_P3293213 | RGL3         | Hs.720291 | ral guanine nucleotide dissociation stimulator-like 3                            | Homo sapiens ral guanine nucleotide dissociation stimulator-like 3 (RGL3), transcript variant 1, mRNA [NM_001161616]                                                                                  | 3.02739 | up | 3.18240 | up | 63.59910    | 21.75284   | 94.55399    | 26.19935   | Detected    | Detected    | Detected | Detected    |
| 1972 | A_23_P399681  | TSSK3        | Hs.512763 | testis-specific serine kinase 3                                                  | Homo sapiens testis-specific serine kinase 3 (TSSK3), mRNA [NM_052841]                                                                                                                                | 3.02649 | up | 2.32472 | up | 83.65308    | 28.62038   | 72.10115    | 27.34877   | Detected    | Detected    | Detected | Detected    |
| 1973 | A_33_P3842770 | LOC644450    | Hs.652926 | hypothetical protein LOC644450                                                   | Homo sapiens hypothetical protein LOC644450, mRNA (cDNA clone IMAGE4606942), partial cds [BC022881]                                                                                                   | 3.02600 | up | 3.06750 | up | 629.92030   | 215.55092  | 544.23180   | 156.44640  | Detected    | Detected    | Detected | Detected    |
| 1974 | A_23_P169278  | AGTPBP1      | Hs.719980 | ATP/GTP binding protein 1                                                        | Homo sapiens ATP/GTP binding protein 1 (AGTPBP1), mRNA [NM_015239]                                                                                                                                    | 3.02415 | up | 3.12577 | up | 1521.22640  | 520.86270  | 1091.82900  | 308.00854  | Detected    | Detected    | Detected | Detected    |
| 1975 | A_23_P100795  | STAT3        | Hs.463059 | signal transducer and activator of transcription 3 (acute-phase response factor) | Homo sapiens signal transducer and activator of transcription 3 (acute-phase response factor) (STAT3), transcript variant 3, mRNA [NM_213862]                                                         | 3.02345 | up | 2.76878 | up | 636.58484   | 218.01482  | 335.40182   | 106.81764  | Detected    | Detected    | Detected | Detected    |
| 1976 | A_24_P23258   | GRAMD4       | Hs.475150 | GRAM domain containing 4                                                         | Homo sapiens GRAM domain containing 4 (GRAMD4), mRNA [NM_015124]                                                                                                                                      | 3.02080 | up | 3.48345 | up | 1365.56760  | 468.08524  | 949.24800   | 240.28992  | Detected    | Detected    | Detected | Detected    |
| 1977 | A_23_P202458  | ZNF22        | Hs.462693 | zinc finger protein 22 (KOX 15)                                                  | Homo sapiens zinc finger protein 22 (KOX 15) (ZNF22), mRNA [NM_006963]                                                                                                                                | 3.02066 | up | 2.93670 | up | 5688.99070  | 1950.14040 | 3826.23440  | 1148.88560 | Detected    | Detected    | Detected | Detected    |
| 1978 | A_23_P67367   | DHDH         | Hs.631555 | dihydrodiol dehydrogenase (dimeric)                                              | Homo sapiens dihydrodiol dehydrogenase (dimeric) (DHDH), mRNA [NM_014475]                                                                                                                             | 3.01993 | up | 5.45467 | up | 134.07211   | 45.97004   | 115.67278   | 18.69942   | Detected    | Detected    | Detected | Detected    |
| 1979 | A_33_P3255304 | GGT5         | Hs.437156 | gamma-glutamyltransferase 5                                                      | Homo sapiens gamma-glutamyltransferase 5 (GGT5), transcript variant 1, mRNA [NM_001099781]                                                                                                            | 3.01809 | up | 2.87783 | up | 11398.43600 | 3910.62040 | 10511.74400 | 3220.88010 | Detected    | Detected    | Detected | Detected    |
| 1980 | A_33_P3260722 | UVRAG        | Hs.719175 | UV radiation resistance associated gene                                          | Homo sapiens UV radiation resistance associated gene (UVRAG), mRNA [NM_003369]                                                                                                                        | 3.01799 | up | 2.71667 | up | 339.56033   | 116.50182  | 243.02728   | 78.88307   | Detected    | Detected    | Detected | Detected    |
| 1981 | A_33_P3401782 | C19orf54     | Hs.585105 | chromosome 19 open reading frame 54                                              | Homo sapiens chromosome 19 open reading frame 54 (C19orf54), mRNA [NM_189476]                                                                                                                         | 3.01571 | up | 3.72068 | up | 43.22903    | 14.84289   | 61.06197    | 14.47151   | Detected    | Compromised | Detected | Detected    |
| 1982 | A_24_P114032  | EFNA3        | Hs.516656 | ephrin-A3                                                                        | Homo sapiens ephrin-A3 (EFNA3), mRNA [NM_004952]                                                                                                                                                      | 3.01175 | up | 1.58570 | up | 21.10319    | 7.25542    | 17.46218    | 9.71052    | Detected    | Compromised | Detected | Compromised |
| 1983 | A_23_P400603  | MGC21881     | Hs.721449 | hypothetical locus MGC21881                                                      | Homo sapiens hypothetical locus MGC21881 (MGC21881), non-coding RNA [NR_015363]                                                                                                                       | 3.00818 | up | 4.81193 | up | 133.80460   | 46.05748   | 63.02007    | 11.54849   | Detected    | Detected    | Detected | Compromised |
| 1984 | A_23_P40059   | PMS1         | Hs.111749 | PMS1 postmeiotic segregation increased 1 (S. cerevisiae)                         | Homo sapiens PMS1 postmeiotic segregation increased 1 (S. cerevisiae) (PMS1), transcript variant 1, mRNA [NM_000534]                                                                                  | 3.00743 | up | 3.15183 | up | 1165.18870  | 401.17540  | 851.95557   | 238.35237  | Detected    | Detected    | Detected | Detected    |

|      |               |              |           |                                                             |                                                                                                                                     |         |    |          |    |             |            |             |            |          |             |             |             |
|------|---------------|--------------|-----------|-------------------------------------------------------------|-------------------------------------------------------------------------------------------------------------------------------------|---------|----|----------|----|-------------|------------|-------------|------------|----------|-------------|-------------|-------------|
| 1985 | A_33_P3363720 | C1orf213     | Hs.61884  | chromosome 1 open reading frame 213                         | Homo sapiens chromosome 1 open reading frame 213 (C1orf213), transcript variant 2, mRNA [NM_001008896]                              | 3.00719 | up | 2.42749  | up | 193.36092   | 66.57955   | 248.85594   | 90.39758   | Detected | Detected    | Detected    | Detected    |
| 1986 | A_33_P3229953 | EEF1A2       | Hs.433839 | eukaryotic translation elongation factor 1 alpha 2          | Homo sapiens eukaryotic translation elongation factor 1 alpha 2 (EEF1A2), mRNA [NM_0010356]                                         | 3.00700 | up | 3.36044  | up | 80.12863    | 27.59227   | 119.70182   | 31.41015   | Detected | Detected    | Detected    | Detected    |
| 1987 | A_23_P74778   | C1orf54      | Hs.91283  | chromosome 1 open reading frame 54                          | Homo sapiens chromosome 1 open reading frame 54 (C1orf54), mRNA [NM_024579]                                                         | 3.00566 | up | 3.20331  | up | 7380.55220  | 2542.62200 | 5828.62840  | 1604.47360 | Detected | Detected    | Detected    | Detected    |
| 1988 | A_24_P343621  | ECHDC3       | Hs.22242  | enoyl Coenzyme A hydratase domain containing 3              | Homo sapiens enoyl Coenzyme A hydratase domain containing 3 (ECHDC3), nuclear gene encoding mitochondrial protein, mRNA [NM_024693] | 3.00505 | up | 2.59341  | up | 744.48160   | 256.52835  | 860.37750   | 292.53854  | Detected | Detected    | Detected    | Detected    |
| 1989 | A_24_P177604  | PPP1R3F      | Hs.433652 | protein phosphatase 1, regulatory (inhibitor) subunit 3F    | Homo sapiens protein phosphatase 1, regulatory (inhibitor) subunit 3F (PPP1R3F), mRNA [NM_033215]                                   | 3.00445 | up | 2.83727  | up | 405.06677   | 139.60307  | 405.28558   | 125.95813  | Detected | Detected    | Detected    | Detected    |
| 1990 | A_23_P328621  | UBQLNL       | Hs.10688  | ubiquilin-like                                              | Homo sapiens ubiquilin-like (UBQLNL), mRNA [NM_145053]                                                                              | 3.00227 | up | 1.72009  | up | 18.69742    | 6.44859    | 10.91021    | 5.59305    | Detected | Compromised | Compromised | Compromised |
| 1991 | A_33_P3334313 | ACTR3B       | Hs.647117 | ARP3 actin-related protein 3 homolog B (yeast)              | Homo sapiens ARP3 actin-related protein 3 homolog B (yeast) (ACTR3B), transcript variant 1, mRNA [NM_020445]                        | 2.99978 | up | 3.11399  | up | 759.95886   | 262.32153  | 628.76086   | 178.04646  | Detected | Detected    | Detected    | Detected    |
| 1992 | A_24_P110914  | LOC100190939 | Hs.375766 | hypothetical LOC100190939                                   | Homo sapiens hypothetical LOC100190939 (LOC100190939), non-coding RNA [NR_024458]                                                   | 2.99876 | up | 5.15297  | up | 4986.03760  | 1721.65840 | 4266.35800  | 730.07070  | Detected | Detected    | Detected    | Detected    |
| 1993 | A_33_P3246258 | Hs.675058    |           |                                                             | cDNA FLJ26009 fs, clone HRT03250 [Source:UniProtKB/TrEMBL;Acc:Q6ZP D4] [ENST00000400449]                                            | 2.99322 | up | 1.82041  | up | 11.53324    | 3.98976    | 12.97457    | 6.28475    | Detected | Compromised | Detected    | Compromised |
| 1994 | A_23_P321354  | TMEM71       | Hs.293842 | transmembrane protein 71                                    | Homo sapiens transmembrane protein 71 (TMEM71), transcript variant 1, mRNA [NM_144649]                                              | 2.99319 | up | 2.94951  | up | 137.41730   | 47.53796   | 113.90599   | 34.05359   | Detected | Detected    | Detected    | Detected    |
| 1995 | A_24_P468810  | RBBP4        | Hs.16003  | retinoblastoma binding protein 4                            | Homo sapiens retinoblastoma binding protein 4 (RBBP4), transcript variant 1, mRNA [NM_005610]                                       | 2.99286 | up | 3.20335  | up | 2148.65010  | 743.38354  | 1851.00320  | 509.52820  | Detected | Detected    | Detected    | Detected    |
| 1996 | A_23_P166616  | AGTR1        | Hs.477887 | angiotensin II receptor, type 1                             | Homo sapiens angiotensin II receptor, type 1 (AGTR1), transcript variant 4, mRNA [NM_031850]                                        | 2.99282 | up | 3.32278  | up | 74.66245    | 25.63180   | 73.51761    | 19.50990   | Detected | Detected    | Detected    | Detected    |
| 1997 | A_32_P161913  | C1orf70      | Hs.668654 | chromosome 1 open reading frame 70                          | Homo sapiens chromosome 1 open reading frame 70 (C1orf70), mRNA [NM_001114748]                                                      | 2.99255 | up | 2.30950  | up | 380.63254   | 131.70338  | 515.75360   | 196.91965  | Detected | Detected    | Detected    | Detected    |
| 1998 | A_33_P3268618 | WDR19        | Hs.438482 | WD repeat domain 19                                         | Homo sapiens WD repeat domain 19 (WDR19), mRNA [NM_025132]                                                                          | 2.99154 | up | 3.07527  | up | 8196.03000  | 2836.88280 | 6540.60800  | 1875.42900 | Detected | Detected    | Detected    | Detected    |
| 1999 | A_23_P12554   | PKD2L1       | Hs.159241 | polycystic kidney disease 2-like 1                          | Homo sapiens polycystic kidney disease 2-like 1 (PKD2L1), mRNA [NM_016112]                                                          | 2.99047 | up | 29.51362 | up | 13.20559    | 4.57249    | 82.15697    | 2.45464    | Detected | Compromised | Detected    | Compromised |
| 2000 | A_33_P3359115 | LMBR1        | Hs.271643 | LMBR1 domain containing 1                                   | Homo sapiens LMBR1 domain containing 1 (LMBR1), mRNA [NM_018368]                                                                    | 2.98950 | up | 3.06211  | up | 19315.27300 | 6690.13670 | 12400.31500 | 3570.89900 | Detected | Detected    | Detected    | Detected    |
| 2001 | A_32_P40463   | NUDT9P1      |           |                                                             | Homo sapiens nudix (nucleoside diphosphate linked moiety X)-type motif 9 pseudogene 1 (NUDT9P1), non-coding RNA [NR_002779]         | 2.98845 | up | 2.80380  | up | 372.01352   | 128.89795  | 229.39113   | 72.14327   | Detected | Detected    | Detected    | Detected    |
| 2002 | A_33_P3422822 | GJC2         | Hs.100072 | gap junction protein, gamma 2, 47kDa                        | Homo sapiens gap junction protein, gamma 2, 47kDa (GJC2), mRNA [NM_020435]                                                          | 2.98770 | up | 2.97294  | up | 1117.76040  | 387.38718  | 1043.61670  | 309.54245  | Detected | Detected    | Detected    | Detected    |
| 2003 | A_32_P131050  | ZNF148       | Hs.592591 | zinc finger protein 148                                     | Homo sapiens zinc finger protein 148 (ZNF148), mRNA [NM_021964]                                                                     | 2.98676 | up | 2.88570  | up | 711.98510   | 246.83333  | 613.58154   | 187.49352  | Detected | Detected    | Detected    | Detected    |
| 2004 | A_33_P3302736 | ZNF397OS     | Hs.596302 | zinc finger protein 397 opposite strand                     | Homo sapiens zinc finger protein 397 opposite strand (ZNF397OS), mRNA [NM_001166012]                                                | 2.98673 | up | 2.33170  | up | 26.56560    | 9.20994    | 22.31098    | 8.43746    | Detected | Compromised | Detected    | Compromised |
| 2005 | A_33_P3423440 | ZNF720       | Hs.528826 | zinc finger protein 720                                     | Homo sapiens zinc finger protein 720 (ZNF720), mRNA [NM_001130913]                                                                  | 2.98669 | up | 2.66325  | up | 417.56840   | 144.76729  | 286.51730   | 94.86462   | Detected | Detected    | Detected    | Detected    |
| 2006 | A_23_P310460  | MDGA1        | Hs.437993 | MAM domain containing glycosylphosphatidylinositol anchor 1 | Homo sapiens MAM domain containing glycosylphosphatidylinositol anchor 1 (MDGA1), mRNA [NM_153487]                                  | 2.98619 | up | 3.28066  | up | 286.82030   | 99.45467   | 234.49550   | 63.02875   | Detected | Detected    | Detected    | Detected    |
| 2007 | A_33_P3323945 | CEND1        | Hs.22140  | cell cycle exit and neuronal differentiation 1              | Homo sapiens cell cycle exit and neuronal differentiation 1 (CEND1), mRNA [NM_016564]                                               | 2.98350 | up | 2.88468  | up | 1715.48860  | 595.38070  | 1699.07700  | 519.37500  | Detected | Detected    | Detected    | Detected    |
| 2008 | A_23_P76983   | C14orf45     | Hs.644621 | chromosome 14 open reading frame 45                         | Homo sapiens chromosome 14 open reading frame 45 (C14orf45), mRNA [NM_025057]                                                       | 2.98296 | up | 2.85462  | up | 806.80884   | 280.06293  | 736.07227   | 227.37245  | Detected | Detected    | Detected    | Detected    |
| 2009 | A_33_P3251640 | LOC284440    |           |                                                             | Homo sapiens hypothetical LOC284440 (LOC284440), non-coding RNA [NR_026956]                                                         | 2.97765 | up | 3.22221  | up | 44.78602    | 15.56710   | 7.06456     | 2.68256    | Detected | Compromised | Compromised | Compromised |
| 2010 | A_24_P239076  | IQLL1        | Hs.348935 | immunoglobulin lambda-like polypeptide 1                    | Homo sapiens immunoglobulin lambda-like polypeptide 1 (IQLL1), transcript variant 1, mRNA [NM_020070]                               | 2.97757 | up | 2.79335  | up | 570.68030   | 198.45590  | 528.39716   | 166.80167  | Detected | Detected    | Detected    | Detected    |
| 2011 | A_23_P153026  | GAA          | Hs.1437   | glucosidase, alpha; acid                                    | Homo sapiens glucosidase, alpha; acid (GAA), transcript variant 1, mRNA [NM_000152]                                                 | 2.97734 | up | 2.80461  | up | 14493.13400 | 5040.41850 | 13046.86300 | 4102.03960 | Detected | Detected    | Detected    | Detected    |
| 2012 | A_33_P3298062 | ABCC5        | Hs.606340 | ATP-binding cassette, sub-family C (CFTR/MRP), member 5     | Homo sapiens ATP-binding cassette, sub-family C (CFTR/MRP), member 5 (ABCC5), transcript variant 2, mRNA [NM_001023587]             | 2.97631 | up | 2.95810  | up | 1481.47520  | 515.40530  | 1004.20960  | 299.34830  | Detected | Detected    | Detected    | Detected    |
| 2013 | A_33_P3408320 | LASS1        | Hs.412355 | LAG1 homolog, ceramide synthase 1                           | Homo sapiens LAG1 homolog, ceramide synthase 1 (LASS1), transcript variant 2, mRNA [NM_198207]                                      | 2.97621 | up | 2.79456  | up | 892.38310   | 310.47076  | 678.11040   | 213.97015  | Detected | Detected    | Detected    | Detected    |
| 2014 | A_33_P3351197 | MGC21881     | Hs.721511 | hypothetical locus MGC21881                                 | Homo sapiens hypothetical locus MGC21881 (MGC21881), non-coding RNA [NR_015363]                                                     | 2.97574 | up | 2.24049  | up | 215.36563   | 74.94025   | 193.17574   | 76.02843   | Detected | Detected    | Detected    | Detected    |

|      |               |              |           |                                                                     |                                                                                                                       |         |    |         |    |              |              |              |              |          |             |             |             |
|------|---------------|--------------|-----------|---------------------------------------------------------------------|-----------------------------------------------------------------------------------------------------------------------|---------|----|---------|----|--------------|--------------|--------------|--------------|----------|-------------|-------------|-------------|
| 2015 | A_33_P3318746 |              |           |                                                                     | Protein cornichon homolog 4 [Source:UniProtKB/Swiss-Prot;Acc:Q9P003] [ENST00000366856]                                | 2.97441 | up | 2.97866 | up | 3766.94680   | 1311.35890   | 2875.61250   | 851.28564    | Detected | Detected    | Detected    | Detected    |
| 2016 | A_24_P411561  | HAVCR2       | Hs.710500 | hepatitis A virus cellular receptor 2                               | Homo sapiens hepatitis A virus cellular receptor 2 (HAVCR2), mRNA [NM_032732]                                         | 2.97035 | up | 4.79614 | up | 26.30078     | 9.16842      | 17.67664     | 3.24993      | Detected | Compromised | Detected    | Compromised |
| 2017 | A_33_P3241521 | EBF1         | Hs.573143 | early B-cell factor 1                                               | Homo sapiens early B-cell factor 1 (EBF1), mRNA [NM_024007]                                                           | 2.97012 | up | 1.24625 | up | 47.24593     | 16.47115     | 57.04293     | 40.36115     | Detected | Compromised | Detected    | Detected    |
| 2018 | A_24_P414719  | NFYA         | Hs.10441  | nuclear transcription factor Y, alpha                               | Homo sapiens nuclear transcription factor Y, alpha (NFYA), transcript variant 1, mRNA [NM_002505]                     | 2.96949 | up | 2.90099 | up | 1035.96310   | 361.23975    | 1013.27290   | 307.99695    | Detected | Detected    | Detected    | Detected    |
| 2019 | A_33_P3351982 | C2orf64      | Hs.596537 | chromosome 2 open reading frame 64                                  | Homo sapiens chromosome 2 open reading frame 64 (C2orf64), mRNA [NM_001008215]                                        | 2.96531 | up | 3.18763 | up | 2605.54610   | 909.83320    | 2168.25000   | 599.80060    | Detected | Detected    | Detected    | Detected    |
| 2020 | A_23_P358410  | SRGAP3       | Hs.654743 | SLIT-ROBO Rho GTPase activating protein 3                           | Homo sapiens SLIT-ROBO Rho GTPase activating protein 3 (SRGAP3), transcript variant 1, mRNA [NM_014850]               | 2.96281 | up | 2.94812 | up | 45.36979     | 15.85611     | 27.26046     | 8.15367      | Detected | Compromised | Detected    | Compromised |
| 2021 | A_23_P150147  | SSH3         | Hs.29173  | slingshot homolog 3 (Drosophila)                                    | Homo sapiens slingshot homolog 3 (Drosophila) (SSH3), mRNA [NM_017857]                                                | 2.96280 | up | 2.76108 | up | 402.31046    | 140.60223    | 395.28020    | 126.23850    | Detected | Detected    | Detected    | Detected    |
| 2022 | A_23_P101392  | TMEM38A      | Hs.436068 | transmembrane protein 38A                                           | Homo sapiens transmembrane protein 38A (TMEM38A), mRNA [NM_024074]                                                    | 2.96232 | up | 4.45036 | up | 215.79321    | 75.42906     | 191.55850    | 37.95522     | Detected | Detected    | Detected    | Detected    |
| 2023 | A_33_P3321993 |              |           |                                                                     |                                                                                                                       | 2.96140 | up | 1.86272 | up | 18.73614     | 6.55114      | 10.18288     | 4.82046      | Detected | Compromised | Compromised | Compromised |
| 2024 | A_33_P3412184 | LOC100133142 |           | similar to zinc finger protein 208                                  | PREDICTED: Homo sapiens similar to zinc finger protein 208 (LOC100133142), mRNA [XM_001718400]                        | 2.95982 | up | 2.94408 | up | 46.42857     | 16.24253     | 43.30024     | 12.97797     | Detected | Detected    | Detected    | Detected    |
| 2025 | A_23_P431305  | FAM69B       | Hs.495480 | family with sequence similarity 69, member B                        | Homo sapiens family with sequence similarity 69, member B (FAM69B), mRNA [NM_152421]                                  | 2.95958 | up | 5.99479 | up | 231.75310    | 81.08274     | 205.62580    | 30.24610     | Detected | Detected    | Detected    | Detected    |
| 2026 | A_23_P160025  | IFI16        | Hs.380250 | interferon, gamma-inducible protein 16                              | Homo sapiens interferon, gamma-inducible protein 16 (IFI16), mRNA [NM_005531]                                         | 2.95903 | up | 3.04601 | up | 9834.12000   | 3441.27340   | 6287.23440   | 1820.09580   | Detected | Detected    | Detected    | Detected    |
| 2027 | A_33_P3319502 |              |           |                                                                     |                                                                                                                       | 2.95889 | up | 2.58090 | up | 33038.22300  | 11561.68200  | 31721.59000  | 10637.98900  | Detected | Detected    | Detected    | Detected    |
| 2028 | A_23_P1691    | MMP1         | Hs.83169  | matrix metalloproteinase 1 (interstitial collagenase)               | Homo sapiens matrix metalloproteinase 1 (interstitial collagenase) (MMP1), transcript variant 1, mRNA [NM_002421]     | 2.95769 | up | 2.79074 | up | 468847.25000 | 164139.19000 | 383133.40000 | 121058.71000 | Detected | Detected    | Detected    | Detected    |
| 2029 | A_23_P105409  | MAP3K12      | Hs.713539 | mitogen-activated protein kinase kinase kinase 12                   | Homo sapiens mitogen-activated protein kinase kinase kinase 12 (MAP3K12), mRNA [NM_006301]                            | 2.95721 | up | 2.90150 | up | 553.57230    | 193.83224    | 596.00757    | 181.13179    | Detected | Detected    | Detected    | Detected    |
| 2030 | A_24_P494454  | SPIN3        | Hs.522672 | spindlin family, member 3                                           | Homo sapiens spindlin family, member 3 (SPIN3), transcript variant 1, mRNA [NM_001010862]                             | 2.95623 | up | 2.92725 | up | 166.85257    | 58.44227     | 189.19601    | 56.12359     | Detected | Detected    | Detected    | Detected    |
| 2031 | A_23_P132341  | C2orf46      | Hs.517653 | chromosome 22 open reading frame 46                                 | Homo sapiens chromosome 22 open reading frame 46 (C2orf46), mRNA [NM_001142964]                                       | 2.95569 | up | 2.56367 | up | 495.12097    | 173.45440    | 525.61786    | 180.78955    | Detected | Detected    | Detected    | Detected    |
| 2032 | A_23_P92499   | TLR2         | Hs.519033 | toll-like receptor 2                                                | Homo sapiens toll-like receptor 2 (TLR2), mRNA [NM_003264]                                                            | 2.95519 | up | 2.95155 | up | 3031.82840   | 1062.31350   | 2123.45430   | 634.39325    | Detected | Detected    | Detected    | Detected    |
| 2033 | A_23_P38167   | GPRC5C       | Hs.446438 | G protein-coupled receptor, family C, group 5, member C             | Homo sapiens G protein-coupled receptor, family C, group 5, member C (GPRC5C), transcript variant 1, mRNA [NM_022036] | 2.95455 | up | 4.05598 | up | 233.73895    | 81.91668     | 184.60709    | 40.13455     | Detected | Detected    | Detected    | Detected    |
| 2034 | A_33_P3319542 | SLC8A2       | Hs.172884 | solute carrier family 8 (sodium/calcium exchanger), member 2        | Homo sapiens solute carrier family 8 (sodium/calcium exchanger), member 2 (SLC8A2), mRNA [NM_015063]                  | 2.95346 | up | 9.62375 | up | 35.87996     | 12.57924     | 33.84625     | 3.10121      | Detected | Compromised | Detected    | Compromised |
| 2035 | A_33_P3300610 | OR7G2        | Hs.553774 | olfactory receptor, family 7, subfamily G, member 2                 | Homo sapiens olfactory receptor, family 7, subfamily G, member 2 (OR7G2), mRNA [NM_001005193]                         | 2.95191 | up | 1.24103 | up | 107.58154    | 37.73705     | 10.55803     | 7.50182      | Detected | Detected    | Compromised | Compromised |
| 2036 | A_24_P194931  | SMEK2        | Hs.516182 | SMEK homolog 2, suppressor of mek1 (Dictyostelium)                  | Homo sapiens SMEK homolog 2, suppressor of mek1 (Dictyostelium) (SMEK2), transcript variant 2, mRNA [NM_020463]       | 2.95139 | up | 3.20871 | up | 1073.46400   | 376.61180    | 706.49554    | 194.15303    | Detected | Detected    | Detected    | Detected    |
| 2037 | A_23_P69100   | SGEF         | Hs.240845 | Src homology 3 domain-containing guanine nucleotide exchange factor | Homo sapiens Src homology 3 domain-containing guanine nucleotide exchange factor (SGEF), mRNA [NM_015595]             | 2.94983 | up | 2.83023 | up | 106.25249    | 37.29717     | 100.07902    | 31.18078     | Detected | Detected    | Detected    | Detected    |
| 2038 | A_23_P155123  | CYP2D6       | Hs.648256 | cytochrome P450, family 2, subfamily D, polypeptide 6               | Homo sapiens cytochrome P450, family 2, subfamily D, polypeptide 6 (CYP2D6), transcript variant 1, mRNA [NM_000106]   | 2.94935 | up | 2.72445 | up | 100.15979    | 35.16417     | 99.32974     | 32.14886     | Detected | Detected    | Detected    | Detected    |
| 2039 | A_33_P3226439 |              |           |                                                                     |                                                                                                                       | 2.94843 | up | 3.03758 | up | 1860.69970   | 653.45886    | 1494.11700   | 433.73320    | Detected | Detected    | Detected    | Detected    |
| 2040 | A_23_P130974  | KIAA1683     | Hs.313471 | KIAA1683                                                            | Homo sapiens KIAA1683 (KIAA1683), transcript variant 2, mRNA [NM_025249]                                              | 2.94722 | up | 3.13897 | up | 228.67613    | 80.34187     | 220.36168    | 61.90340     | Detected | Detected    | Detected    | Detected    |
| 2041 | A_23_P153941  | C2orf34      | Hs.468349 | chromosome 2 open reading frame 34                                  | Homo sapiens chromosome 2 open reading frame 34 (C2orf34), mRNA [NM_024766]                                           | 2.94704 | up | 2.51088 | up | 21.22817     | 7.45865      | 15.49402     | 5.44132      | Detected | Compromised | Detected    | Compromised |
| 2042 | A_23_P59138   | POU5F1       | Hs.249184 | POU class 5 homeobox 1                                              | Homo sapiens POU class 5 homeobox 1 (POU5F1), transcript variant 1, mRNA [NM_002701]                                  | 2.94692 | up | 2.98864 | up | 665.32104    | 233.77365    | 520.54330    | 153.58511    | Detected | Detected    | Detected    | Detected    |
| 2043 | A_23_P110941  | GSTA4        | Hs.485557 | glutathione S-transferase alpha 4                                   | Homo sapiens glutathione S-transferase alpha 4 (GSTA4), mRNA [NM_001512]                                              | 2.94685 | up | 2.94953 | up | 1384.71950   | 486.55990    | 984.96700    | 294.46550    | Detected | Detected    | Detected    | Detected    |
| 2044 | A_33_P3308744 | LAMA4        | Hs.654572 | laminin, alpha 4                                                    | Homo sapiens laminin, alpha 4 (LAMA4), transcript variant 1, mRNA [NM_001105206]                                      | 2.94646 | up | 3.03550 | up | 1066.23690   | 374.70218    | 1035.37990   | 300.77026    | Detected | Detected    | Detected    | Detected    |
| 2045 | A_23_P133691  | RRAGD        | Hs.31712  | Ras-related GTP binding D                                           | Homo sapiens Ras-related GTP binding D (RRAGD), mRNA [NM_021244]                                                      | 2.94415 | up | 5.38316 | up | 72.32405     | 25.43640     | 45.94708     | 7.52638      | Detected | Detected    | Detected    | Compromised |

|      |               |          |           |                                                                                                                                           |                                                                                                                                                                                   |         |    |         |    |             |            |            |            |             |             |          |             |
|------|---------------|----------|-----------|-------------------------------------------------------------------------------------------------------------------------------------------|-----------------------------------------------------------------------------------------------------------------------------------------------------------------------------------|---------|----|---------|----|-------------|------------|------------|------------|-------------|-------------|----------|-------------|
| 2046 | A_24_P416997  | APOL3    | Hs.474737 | apolipoprotein L 3                                                                                                                        | Homo sapiens apolipoprotein L 3 (APOL3), transcript variant beta/a, mRNA [NM_145641]                                                                                              | 2.94313 | up | 2.37668 | up | 98.85288    | 34.77864   | 62.67815   | 23.25467   | Detected    | Detected    | Detected | Detected    |
| 2047 | A_33_P3294911 | C12orf66 |           | chromosome 12 open reading frame 66                                                                                                       | UPF0536 protein C12orf66 [Source:UniProtKB/Swiss-Prot;Acc:Q98MD2] [ENST00000311915]                                                                                               | 2.94164 | up | 2.41211 | up | 35.35727    | 12.44580   | 34.55707   | 12.63295   | Detected    | Compromised | Detected | Compromised |
| 2048 | A_23_P254165  | RAI2     | Hs.446680 | retinoic acid induced 2                                                                                                                   | Homo sapiens retinoic acid induced 2 (RAI2), mRNA [NM_021785]                                                                                                                     | 2.93924 | up | 2.85866 | up | 209.66472   | 73.86247   | 158.37370  | 48.85247   | Detected    | Detected    | Detected | Detected    |
| 2049 | A_33_P3401826 | CMPK2    | Hs.7155   | cytidine monophosphate (UMP-CMP) kinase 2, mitochondrial                                                                                  | Homo sapiens cytidine monophosphate (UMP-CMP) kinase 2, mitochondrial (CMPK2), nuclear gene encoding mitochondrial protein, mRNA [NM_207315]                                      | 2.93912 | up | 2.72939 | up | 825.16974   | 290.70990  | 571.33026  | 184.58140  | Detected    | Detected    | Detected | Detected    |
| 2050 | A_33_P3241393 | SLOC4A5  | Hs.594099 | solute carrier family 4, sodium bicarbonate cotransporter, member 5                                                                       | Homo sapiens solute carrier family 4, sodium bicarbonate cotransporter, member 5 (SLOC4A5), transcript variant c, mRNA [NM_133478]                                                | 2.93902 | up | 2.85877 | up | 88.13061    | 31.04967   | 69.94727   | 21.57534   | Detected    | Detected    | Detected | Detected    |
| 2051 | A_32_P85539   | HCFC2    | Hs.506558 | host cell factor C2                                                                                                                       | Homo sapiens host cell factor C2 (HCFC2), mRNA [NM_013320]                                                                                                                        | 2.93844 | up | 3.14729 | up | 1616.85290  | 569.75415  | 1009.51820 | 282.84120  | Detected    | Detected    | Detected | Detected    |
| 2052 | A_33_P3272291 | AKR1C4   | Hs.567245 | aldo-keto reductase family 1, member C4 (chlorocone reductase; 3-alpha hydroxysteroid dehydrogenase, type I; dihydrodiol dehydrogenase 4) | Homo sapiens aldo-keto reductase family 1, member C4 (chlorocone reductase; 3-alpha hydroxysteroid dehydrogenase, type I; dihydrodiol dehydrogenase 4) (AKR1C4), mRNA [NM_001818] | 2.93551 | up | 3.61222 | up | 1666.14060  | 594.76227  | 312.36713  | 76.25301   | Detected    | Detected    | Detected | Detected    |
| 2053 | A_33_P3266928 | LMTK3    | Hs.207426 | lemur tyrosine kinase 3                                                                                                                   | Homo sapiens lemur tyrosine kinase 3 (LMTK3), mRNA [NM_001080434]                                                                                                                 | 2.93249 | up | 2.60112 | up | 382.56100   | 135.08199  | 376.16867  | 127.52279  | Detected    | Detected    | Detected | Detected    |
| 2054 | A_23_P136683  | HLA-DQB1 | Hs.409934 | major histocompatibility complex, class II, DQ beta 1                                                                                     | Homo sapiens major histocompatibility complex, class II, DQ beta 1 (HLA-DQB1), mRNA [NM_002123]                                                                                   | 2.92821 | up | 6.70233 | up | 10.89868    | 3.85394    | 20.64814   | 2.71657    | Compromised | Compromised | Detected | Compromised |
| 2055 | A_23_P159974  | KLHL13   | Hs.348262 | kelch-like 13 (Drosophila)                                                                                                                | Homo sapiens kelch-like 13 (Drosophila) (KLHL13), mRNA [NM_033495]                                                                                                                | 2.92757 | up | 2.99623 | up | 66.84304    | 23.64190   | 63.65384   | 18.73332   | Detected    | Detected    | Detected | Detected    |
| 2056 | A_23_P130149  | ENO3     | Hs.224171 | enolase 3 (beta, muscle)                                                                                                                  | Homo sapiens enolase 3 (beta, muscle) (ENO3), transcript variant 1, mRNA [NM_001976]                                                                                              | 2.92326 | up | 3.01928 | up | 689.20950   | 244.12788  | 612.56433  | 178.90134  | Detected    | Detected    | Detected | Detected    |
| 2057 | A_24_P261005  | C8orf40  | Hs.655320 | chromosome 8 open reading frame 40                                                                                                        | Homo sapiens chromosome 8 open reading frame 40 (C8orf40), transcript variant 3, mRNA [NM_138436]                                                                                 | 2.92248 | up | 2.98725 | up | 4703.88600  | 1666.62620 | 3282.40430 | 968.91550  | Detected    | Detected    | Detected | Detected    |
| 2058 | A_23_P27515   | PLD3     | Hs.257008 | phospholipase D family, member 3                                                                                                          | Homo sapiens phospholipase D family, member 3 (PLD3), transcript variant 2, mRNA [NM_012268]                                                                                      | 2.92158 | up | 2.23594 | up | 2568.61940  | 910.36380  | 2497.27600 | 984.85370  | Detected    | Detected    | Detected | Detected    |
| 2059 | A_23_P328034  | C20orf96 | Hs.348112 | chromosome 20 open reading frame 96                                                                                                       | Homo sapiens chromosome 20 open reading frame 96 (C20orf96), mRNA [NM_153269]                                                                                                     | 2.92144 | up | 3.70952 | up | 75.09042    | 26.61464   | 82.52980   | 19.61817   | Detected    | Detected    | Detected | Detected    |
| 2060 | A_33_P3233666 | RPP30    | Hs.139120 | ribonuclease P/MRP 30kDa subunit                                                                                                          | Homo sapiens ribonuclease P/MRP 30kDa subunit (RPP30), transcript variant 1, mRNA [NM_001104546]                                                                                  | 2.92006 | up | 3.12868 | up | 566.02540   | 200.71365  | 478.56424  | 134.87918  | Detected    | Detected    | Detected | Detected    |
| 2061 | A_24_P237586  | ANKRD37  | Hs.508154 | ankyrin repeat domain 37                                                                                                                  | Homo sapiens ankyrin repeat domain 37 (ANKRD37), mRNA [NM_181726]                                                                                                                 | 2.91993 | up | 2.83673 | up | 1622.78170  | 575.46747  | 1271.10850 | 395.12160  | Detected    | Detected    | Detected | Detected    |
| 2062 | A_23_P252062  | PPARG    | Hs.162646 | peroxisome proliferator-activated receptor gamma                                                                                          | Homo sapiens peroxisome proliferator-activated receptor gamma (PPARG), transcript variant 3, mRNA [NM_138711]                                                                     | 2.91944 | up | 2.79086 | up | 3062.86800  | 1086.32960 | 2929.38920 | 925.55970  | Detected    | Detected    | Detected | Detected    |
| 2063 | A_33_P3411888 |          |           | GB                                                                                                                                        |                                                                                                                                                                                   | 2.91776 | up | 2.47162 | up | 81.24480    | 28.83233   | 62.48163   | 22.29135   | Detected    | Detected    | Detected | Detected    |
| 2064 | A_23_P123193  | ACTR3B   | Hs.647117 | ARP3 actin-related protein 3 homolog B (yeast)                                                                                            | Homo sapiens ARP3 actin-related protein 3 homolog B (yeast) (ACTR3B), transcript variant 1, mRNA [NM_020445]                                                                      | 2.91633 | up | 3.11565 | up | 2398.17020  | 851.48430  | 1692.17580 | 478.91965  | Detected    | Detected    | Detected | Detected    |
| 2065 | A_32_P55241   | SHISA2   | Hs.433791 | shisa homolog 2 (Xenopus laevis)                                                                                                          | Homo sapiens shisa homolog 2 (Xenopus laevis) (SHISA2), mRNA [NM_001007538]                                                                                                       | 2.91518 | up | 2.39915 | up | 52.25579    | 18.56106   | 45.69510   | 16.79494   | Detected    | Detected    | Detected | Detected    |
| 2066 | A_23_P57961   | PLXNB1   | Hs.476209 | plexin B1                                                                                                                                 | Homo sapiens plexin B1 (PLXNB1), transcript variant 1, mRNA [NM_002673]                                                                                                           | 2.91411 | up | 2.36816 | up | 567.21533   | 201.54640  | 535.14410  | 199.26257  | Detected    | Detected    | Detected | Detected    |
| 2067 | A_23_P106835  | BBS2     | Hs.333738 | Bardet-Biedl syndrome 2                                                                                                                   | Homo sapiens Bardet-Biedl syndrome 2 (BBS2), mRNA [NM_031885]                                                                                                                     | 2.91406 | up | 2.95775 | up | 5034.76400  | 1788.01500 | 3699.98800 | 1103.07350 | Detected    | Detected    | Detected | Detected    |
| 2068 | A_33_P3260322 |          |           |                                                                                                                                           |                                                                                                                                                                                   | 2.91193 | up | 2.66549 | up | 127.35831   | 45.28754   | 69.63222   | 23.03556   | Detected    | Detected    | Detected | Detected    |
| 2069 | A_23_P217475  | IDS      | Hs.460960 | iduronate 2-sulfatase                                                                                                                     | Homo sapiens iduronate 2-sulfatase (IDS), transcript variant 2, mRNA [NM_006123]                                                                                                  | 2.91166 | up | 3.11697 | up | 12132.33300 | 4314.56640 | 9169.97200 | 2594.18120 | Detected    | Detected    | Detected | Detected    |
| 2070 | A_23_P126908  | TNFRSF14 | Hs.512898 | tumor necrosis factor receptor superfamily, member 14 (herpesvirus entry mediator)                                                        | Homo sapiens tumor necrosis factor receptor superfamily, member 14 (herpesvirus entry mediator) (TNFRSF14), mRNA [NM_003820]                                                      | 2.91105 | up | 2.98760 | up | 3789.02860  | 1347.75830 | 2289.28250 | 675.68300  | Detected    | Detected    | Detected | Detected    |
| 2071 | A_33_P3316073 | INTS6    | Hs.439440 | integrator complex subunit 6                                                                                                              | Homo sapiens integrator complex subunit 6 (INTS6), transcript variant 1, mRNA [NM_012141]                                                                                         | 2.90584 | up | 2.90222 | up | 67.31969    | 23.98850   | 62.22517   | 18.90608   | Detected    | Detected    | Detected | Detected    |
| 2072 | A_33_P3388806 |          |           |                                                                                                                                           | Fucose-1-phosphate guanylyltransferase (EC 2.7.7.30)(GDP-L-fucose pyrophosphorylase)(GDP-L-fucose diphosphorylase) [Source:UniProtKB/Swiss-Prot;Acc:O14772] [ENST00000370889]     | 2.90527 | up | 4.59342 | up | 33.63691    | 11.98844   | 19.23536   | 3.69258    | Detected    | Compromised | Detected | Compromised |
| 2073 | A_24_P941167  | APOL6    | Hs.257352 | apolipoprotein L 6                                                                                                                        | Homo sapiens apolipoprotein L 6 (APOL6), mRNA [NM_030641]                                                                                                                         | 2.90382 | up | 1.76568 | up | 71.45064    | 25.47823   | 143.11147  | 71.47081   | Detected    | Detected    | Detected | Detected    |
| 2074 | A_24_P62530   | RHOU     | Hs.647774 | ras homolog gene family, member U                                                                                                         | Homo sapiens ras homolog gene family, member U (RHOU), mRNA [NM_021205]                                                                                                           | 2.90355 | up | 3.30899 | up | 275.59726   | 98.28299   | 270.00394  | 71.95151   | Detected    | Detected    | Detected | Detected    |

|      |               |              |           |                                                                                                   |                                                                                                                                                                  |         |    |         |    |             |             |             |             |             |             |             |             |
|------|---------------|--------------|-----------|---------------------------------------------------------------------------------------------------|------------------------------------------------------------------------------------------------------------------------------------------------------------------|---------|----|---------|----|-------------|-------------|-------------|-------------|-------------|-------------|-------------|-------------|
| 2075 | A_23_P113351  | SPARCL1      | Hs.62886  | SPARC-like 1 (hevin)                                                                              | Homo sapiens SPARC-like 1 (hevin) (SPARCL1), transcript variant 2, mRNA [NM_004684]                                                                              | 2.90294 | up | 1.36039 | up | 12.89796    | 4.60063     | 4.49258     | 2.91204     | Detected    | Compromised | Compromised | Compromised |
| 2076 | A_33_P3352307 | RPS6KA1      | Hs.149957 | ribosomal protein S6 kinase, 90kDa, polypeptide 1                                                 | Homo sapiens ribosomal protein S6 kinase, 90kDa, polypeptide 1 (RPS6KA1), transcript variant 1, mRNA [NM_029553]                                                 | 2.90215 | up | 3.03785 | up | 213.86641   | 76.23403    | 166.99028   | 48.47187    | Detected    | Detected    | Detected    | Detected    |
| 2077 | A_23_P117506  | DHRS7        | Hs.59719  | dehydrogenase/reductase (SDR family) member 7                                                     | Homo sapiens dehydrogenase/reductase (SDR family) member 7 (DHRS7), mRNA [NM_016029]                                                                             | 2.90168 | up | 2.87034 | up | 10933.61500 | 3901.65010  | 9161.44700  | 2814.46850  | Detected    | Detected    | Detected    | Detected    |
| 2078 | A_33_P3255914 | MYLIP        | Hs.484738 | myosin regulatory light chain interacting protein                                                 | Homo sapiens myosin regulatory light chain interacting protein (MYLIP), mRNA [NM_013262]                                                                         | 2.89985 | up | 2.93423 | up | 3135.57710  | 1119.62990  | 2288.71830  | 687.80130   | Detected    | Detected    | Detected    | Detected    |
| 2079 | A_33_P3379381 | WDR78        | Hs.49421  | WD repeat domain 78                                                                               | Homo sapiens WD repeat domain 78 (WDR78), transcript variant 2, mRNA [NM_207014]                                                                                 | 2.89980 | up | 2.82029 | up | 206.67060   | 73.79790    | 170.77852   | 53.39558    | Detected    | Detected    | Detected    | Detected    |
| 2080 | A_33_P3611762 | FLJ37798     | Hs.544586 | hypothetical gene supported by AK095117                                                           | Homo sapiens cDNA FLJ37798 fis. clone BRSSH200097 [AK095117]                                                                                                     | 2.89779 | up | 2.97507 | up | 6442.59900  | 2302.11650  | 5252.14900  | 1556.70360  | Detected    | Detected    | Detected    | Detected    |
| 2081 | A_33_P3393543 |              | Hs.590968 |                                                                                                   | Putative uncharacterized protein LOC400692 [Source:UniProtKB/Swiss-Prot;Acc:Q8N3U1] [ENST0000316807]                                                             | 2.89771 | up | 2.21072 | up | 57.80022    | 20.65415    | 23.89595    | 9.53139     | Detected    | Detected    | Detected    | Compromised |
| 2082 | A_23_P393777  | PTGDR        | Hs.306831 | prostaglandin D2 receptor (DP)                                                                    | Homo sapiens prostaglandin D2 receptor (DP) (PTGDR), mRNA [NM_000953]                                                                                            | 2.89755 | up | 3.33757 | up | 497.72388   | 177.86531   | 466.53850   | 123.26009   | Detected    | Detected    | Detected    | Detected    |
| 2083 | A_23_P250122  | FAM20C       | Hs.134742 | family with sequence similarity 20, member C                                                      | Homo sapiens family with sequence similarity 20, member C (FAM20C), mRNA [NM_020223]                                                                             | 2.89488 | up | 2.72480 | up | 25324.03300 | 9058.07600  | 25336.24000 | 8199.23200  | Detected    | Detected    | Detected    | Detected    |
| 2084 | A_32_P30381   |              | Hs.586876 |                                                                                                   | Homo sapiens cDNA FLJ43403 fis. clone OCBFF2016612 [AK125393]                                                                                                    | 2.89478 | up | 3.37425 | up | 71.10990    | 25.43589    | 95.09875    | 24.85211    | Detected    | Detected    | Detected    | Detected    |
| 2085 | A_23_P46852   | OBFC1        | Hs.62314  | oligonucleotide/oligosaccharide-binding fold containing 1                                         | Homo sapiens oligonucleotide/oligosaccharide-binding fold containing 1 (OBFC1), mRNA [NM_024928]                                                                 | 2.89424 | up | 3.05379 | up | 7902.74000  | 2827.33130  | 8407.57300  | 2427.70850  | Detected    | Detected    | Detected    | Detected    |
| 2086 | A_23_P129144  | GCOM1        | Hs.437256 | GRINL1A complex locus                                                                             | Homo sapiens GRINL1A complex locus (GCOM1), transcript variant 12, mRNA [NM_001018100]                                                                           | 2.89299 | up | 2.54211 | up | 34.49773    | 12.34743    | 30.71321    | 10.65361    | Detected    | Compromised | Detected    | Compromised |
| 2087 | A_33_P3380126 | MORN3        | Hs.434154 | MORN repeat containing 3                                                                          | Homo sapiens MORN repeat containing 3 (MORN3), mRNA [NM_173855]                                                                                                  | 2.89224 | up | 7.46673 | up | 43.32909    | 15.51238    | 48.84450    | 5.76834     | Detected    | Compromised | Detected    | Compromised |
| 2088 | A_33_P3351879 | LOC100128905 | Hs.456944 | hypothetical LOC100128905                                                                         | PREDICTED: Homo sapiens hypothetical LOC100128905 (LOC100128905), mRNA [XM_001721827]                                                                            | 2.89135 | up | 3.31061 | up | 150.14322   | 53.76984    | 102.15830   | 27.21020    | Detected    | Detected    | Detected    | Detected    |
| 2089 | A_23_P3592    | HSF4         | Hs.512156 | heat shock transcription factor 4                                                                 | Homo sapiens heat shock transcription factor 4 (HSF4), transcript variant 2, mRNA [NM_001040667]                                                                 | 2.89051 | up | 3.19612 | up | 158.30745   | 56.71010    | 151.64409   | 41.83772    | Detected    | Detected    | Detected    | Detected    |
| 2090 | A_23_P352717  | TMEM31       | Hs.98843  | transmembrane protein 31                                                                          | Homo sapiens transmembrane protein 31 (TMEM31), mRNA [NM_182641]                                                                                                 | 2.89026 | up | 1.86091 | up | 52.78613    | 18.91105    | 40.44062    | 19.16273    | Detected    | Detected    | Detected    | Detected    |
| 2091 | A_33_P3241150 |              |           |                                                                                                   |                                                                                                                                                                  | 2.88862 | up | 3.19646 | up | 59.92439    | 21.48062    | 30.79430    | 8.49506     | Detected    | Detected    | Detected    | Compromised |
| 2092 | A_33_P3393694 | GLTSCR2      | Hs.421907 | glioma tumor suppressor candidate region gene 2                                                   | Homo sapiens glioma tumor suppressor candidate region gene 2 (GLTSCR2), mRNA [NM_015710]                                                                         | 2.88716 | up | 2.48704 | up | 84522.08000 | 30313.23000 | 81016.13000 | 28724.60500 | Detected    | Detected    | Detected    | Detected    |
| 2093 | A_32_P69166   | ANKRD42      | Hs.503438 | ankyrin repeat domain 42                                                                          | Homo sapiens ankyrin repeat domain 42 (ANKRD42), mRNA [NM_182603]                                                                                                | 2.88661 | up | 2.85453 | up | 463.78006   | 166.36336   | 414.53104   | 128.05238   | Detected    | Detected    | Detected    | Detected    |
| 2094 | A_33_P3209167 | LOC100131053 | Hs.697104 | hypothetical LOC100131053                                                                         | Homo sapiens cDNA FLJ38245 fis. clone FCBFF2007186 [AK095564]                                                                                                    | 2.88555 | up | 4.56798 | up | 10.51555    | 3.77343     | 17.46403    | 3.37121     | Compromised | Compromised | Detected    | Compromised |
| 2095 | A_33_P3308903 | MIB2         | Hs.135805 | mindbomb homolog 2 (Drosophila)                                                                   | Homo sapiens mindbomb homolog 2 (Drosophila) (MIB2), mRNA [NM_080875]                                                                                            | 2.88503 | up | 2.27755 | up | 832.52200   | 298.79830   | 1062.63570  | 411.41678   | Detected    | Detected    | Detected    | Detected    |
| 2096 | A_33_P3298989 | LOC644021    | Hs.690144 | similar to Cathepsin L1                                                                           | PREDICTED: Homo sapiens similar to Cathepsin L1 (LOC644021), mRNA [XM_001128599]                                                                                 | 2.88460 | up | 3.71591 | up | 10856.85500 | 3897.18550  | 11138.44400 | 2643.16650  | Detected    | Detected    | Detected    | Detected    |
| 2097 | A_32_P10936   | CDH12        | Hs.113684 | cadherin 12, type 2 (N-cadherin 2)                                                                | Homo sapiens cadherin 12, type 2 (N-cadherin 2) (CDH12), mRNA [NM_004061]                                                                                        | 2.88445 | up | 1.08774 | up | 21.86338    | 7.84852     | 12.62809    | 10.23711    | Detected    | Compromised | Detected    | Compromised |
| 2098 | A_23_P44244   | SMARCA1      | Hs.152292 | SWI/SNF related, matrix associated, actin dependent regulator of chromatin, subfamily a, member 1 | Homo sapiens SWI/SNF related, matrix associated, actin dependent regulator of chromatin, subfamily a, member 1 (SMARCA1), transcript variant 1, mRNA [NM_003069] | 2.88251 | up | 3.15339 | up | 6306.14400  | 2265.30080  | 4767.29800  | 1333.09400  | Detected    | Detected    | Detected    | Detected    |
| 2099 | A_33_P3232173 | PSPC1        | Hs.721735 | paraspeckle component 1                                                                           | Paraspeckle component 1 (Paraspeckle protein 1) [Source:UniProtKB/Swiss-Prot;Acc:Q8WXF1] [ENST00000338910]                                                       | 2.88206 | up | 2.15562 | up | 222.52740   | 79.94898    | 118.87029   | 48.62582    | Detected    | Detected    | Detected    | Detected    |
| 2100 | A_23_P40880   | CMTM8        | Hs.154986 | CKLF-like MARVEL transmembrane domain containing 8                                                | Homo sapiens CKLF-like MARVEL transmembrane domain containing 8 (CMTM8), mRNA [NM_178868]                                                                        | 2.88194 | up | 2.73554 | up | 455.41907   | 163.62848   | 342.27386   | 110.33069   | Detected    | Detected    | Detected    | Detected    |
| 2101 | A_24_P248240  | SYT11        | Hs.32984  | synaptotagmin XI                                                                                  | Homo sapiens synaptotagmin XI (SYT11), mRNA [NM_152280]                                                                                                          | 2.88170 | up | 3.03856 | up | 1922.56970  | 690.82230   | 1295.06770  | 375.82864   | Detected    | Detected    | Detected    | Detected    |
| 2102 | A_32_P45974   | LOC100288755 | Hs.635289 | hypothetical LOC100288755                                                                         | PREDICTED: Homo sapiens hypothetical LOC100288755 (LOC100288755), miscRNA [XR_078568]                                                                            | 2.88153 | up | 3.96767 | up | 392.59125   | 141.07527   | 15.24130    | 3.38728     | Detected    | Detected    | Detected    | Compromised |
| 2103 | A_33_P3291614 | LOC100133039 | Hs.667544 | hypothetical protein LOC100133039                                                                 | Homo sapiens cDNA FLJ25312 fis. clone SYN01070 [AK058041]                                                                                                        | 2.88142 | up | 2.90219 | up | 61.03328    | 21.93274    | 36.12417    | 10.97584    | Detected    | Detected    | Detected    | Compromised |
| 2104 | A_33_P3280721 | GPRI17       | Hs.647659 | G protein-coupled receptor 177                                                                    | Homo sapiens G protein-coupled receptor 177 (GPRI17), transcript variant 2, mRNA [NM_001002292]                                                                  | 2.87947 | up | 2.85478 | up | 12352.93750 | 4442.12400  | 10153.52700 | 3136.23850  | Detected    | Detected    | Detected    | Detected    |

|      |               |              |           |                                                                     |                                                                                                                                                                                                                            |         |    |         |    |             |            |             |            |             |             |             |             |
|------|---------------|--------------|-----------|---------------------------------------------------------------------|----------------------------------------------------------------------------------------------------------------------------------------------------------------------------------------------------------------------------|---------|----|---------|----|-------------|------------|-------------|------------|-------------|-------------|-------------|-------------|
| 2105 | A_24_P778836  | RSL1D1       | Hs.401842 | ribosomal L1 domain containing 1                                    | Homo sapiens ribosomal L1 domain containing 1 (RSL1D1), mRNA [NM_015659]                                                                                                                                                   | 2.87873 | up | 2.78658 | up | 3351.80150  | 1205.61910 | 3210.45800  | 1015.92340 | Detected    | Detected    | Detected    | Detected    |
| 2106 | A_23_P67151   | OLFM2        | Hs.189743 | olfactomedin 2                                                      | Homo sapiens olfactomedin 2 (OLFM2), mRNA [NM_058164]                                                                                                                                                                      | 2.87774 | up | 3.37005 | up | 234.24188   | 84.28424   | 241.07013   | 63.07721   | Detected    | Detected    | Detected    | Detected    |
| 2107 | A_23_P79769   | BIRC7        | Hs.256126 | baculoviral IAP repeat-containing 7                                 | Homo sapiens baculoviral IAP repeat-containing 7 (BIRC7), transcript variant 2, mRNA [NM_022161]                                                                                                                           | 2.87492 | up | 3.13553 | up | 42.24916    | 15.21686   | 42.22850    | 11.87571   | Detected    | Compromised | Detected    | Compromised |
| 2108 | A_23_P64058   | RASGRP2      | Hs.99491  | RAS guanyl releasing protein 2 (calcium and DAG-regulated)          | Homo sapiens RAS guanyl releasing protein 2 (calcium and DAG-regulated) (RASGRP2), transcript variant 2, mRNA [NM_153819]                                                                                                  | 2.87388 | up | 9.13052 | up | 552.99225   | 199.24301  | 533.06354   | 51.48126   | Detected    | Detected    | Detected    | Detected    |
| 2109 | A_33_P3234989 | IFT81        | Hs.528382 | intraflagellar transport 81 homolog (Chlamydomonas)                 | Homo sapiens intraflagellar transport 81 homolog (Chlamydomonas) (IFT81), transcript variant 1, mRNA [NM_014055]                                                                                                           | 2.87191 | up | 2.94668 | up | 2924.80900  | 1054.53050 | 2390.37230  | 715.31610  | Detected    | Detected    | Detected    | Detected    |
| 2110 | A_33_P3245449 | LOC389834    | Hs.720653 | ankyrin repeat domain 57 pseudogene                                 | Homo sapiens ankyrin repeat domain 57 pseudogene (LOC389834), non-coding RNA [NR_027420]                                                                                                                                   | 2.87037 | up | 4.16464 | up | 430.68870   | 155.36690  | 298.61328   | 63.22628   | Detected    | Detected    | Detected    | Detected    |
| 2111 | A_32_P410272  |              | Hs.467163 |                                                                     | Putative G-protein coupled receptor GPCR39 (hGPCR39) [Source:UniProtKB/Swiss-Prot;Acc:Q8NGA4] [ENST00000376892]                                                                                                            | 2.86782 | up | 1.77166 | up | 10.05377    | 3.63002    | 14.85978    | 7.39600    | Compromised | Compromised | Detected    | Compromised |
| 2112 | A_33_P3327479 | ZDHH3        | Hs.61430  | zinc finger, DHHC-type containing 3                                 | Homo sapiens zinc finger, DHHC-type containing 3 (ZDHH3), transcript variant 2, mRNA [NM_016598]                                                                                                                           | 2.86482 | up | 2.86761 | up | 4603.69730  | 1663.95680 | 4097.57860  | 1260.00720 | Detected    | Detected    | Detected    | Detected    |
| 2113 | A_33_P3231297 | CREG1        | Hs.5710   | cellular repressor of E1A-stimulated genes 1                        | Homo sapiens cellular repressor of E1A-stimulated genes 1 (CREG1), mRNA [NM_003851]                                                                                                                                        | 2.86447 | up | 2.70662 | up | 18655.48400 | 6743.64400 | 12225.44600 | 3982.93630 | Detected    | Detected    | Detected    | Detected    |
| 2114 | A_33_P3361267 | LOC100128386 | Hs.635125 | hypothetical protein LOC100128386                                   | PREDICTED: Homo sapiens hypothetical protein LOC100128386 (LOC100128386), mRNA [XM_001725380]                                                                                                                              | 2.86266 | up | 8.82983 | up | 79.53380    | 28.76835   | 53.01728    | 5.29457    | Detected    | Detected    | Detected    | Compromised |
| 2115 | A_24_P139901  | GYPC         | Hs.59138  | glycophorin C (Gerbich blood group)                                 | Homo sapiens glycophorin C (Gerbich blood group) (GYPC), transcript variant 1, mRNA [NM_002101]                                                                                                                            | 2.86229 | up | 2.67324 | up | 5293.42100  | 1914.94170 | 8083.65530  | 2666.46460 | Detected    | Detected    | Detected    | Detected    |
| 2116 | A_24_P119545  |              |           |                                                                     | Inositol-trisphosphate 3-kinase B (EC 2.1.1.127) (inositol 1,4,5-trisphosphate 3-kinase B) (IP3 3-kinase B) (IP3K-B) (IP3K B) [Source:UniProtKB/Swiss-Prot;Acc:P27987] [ENST00000366784]                                   | 2.86215 | up | 1.11404 | up | 18.39738    | 6.65573    | 10.97337    | 8.68570    | Detected    | Compromised | Compromised | Compromised |
| 2117 | A_23_P250800  | ST3GAL6      | Hs.148716 | ST3 beta-galactoside alpha-2,3-sialyltransferase 6                  | Homo sapiens ST3 beta-galactoside alpha-2,3-sialyltransferase 6 (ST3GAL6), mRNA [NM_006100]                                                                                                                                | 2.86122 | up | 4.82566 | up | 51.48545    | 18.63228   | 39.71555    | 7.25721    | Detected    | Detected    | Detected    | Compromised |
| 2118 | A_33_P3298775 | PRSSL1       | Hs.245146 | protease, serine-like 1                                             | Homo sapiens protease, serine-like 1 (PRSSL1), mRNA [NM_214710]                                                                                                                                                            | 2.85964 | up | 4.05221 | up | 16.09948    | 5.82953    | 21.15192    | 4.60282    | Detected    | Compromised | Detected    | Compromised |
| 2119 | A_33_P3245454 | LOC389834    | Hs.720653 | ankyrin repeat domain 57 pseudogene                                 | Homo sapiens ankyrin repeat domain 57 pseudogene (LOC389834), non-coding RNA [NR_027420]                                                                                                                                   | 2.85921 | up | 3.46406 | up | 88.69790    | 32.12179   | 62.19928    | 15.83307   | Detected    | Detected    | Detected    | Compromised |
| 2120 | A_33_P3234020 | IGDCC3       | Hs.128292 | immunoglobulin superfamily, DCC subclass, member 3                  | Homo sapiens immunoglobulin superfamily, DCC subclass, member 3 (IGDCC3), mRNA [NM_004884]                                                                                                                                 | 2.85860 | up | 2.78299 | up | 25.31436    | 9.16953    | 16.54029    | 5.24079    | Detected    | Compromised | Detected    | Compromised |
| 2121 | A_33_P3507270 | EFCAB5       | Hs.662411 | EF-hand calcium binding domain 5                                    | Homo sapiens EF-hand calcium binding domain 5 (EFCAB5), transcript variant 1, mRNA [NM_198529]                                                                                                                             | 2.85757 | up | 2.22396 | up | 27.19609    | 9.85468    | 15.27364    | 6.05592    | Detected    | Compromised | Compromised | Compromised |
| 2122 | A_24_P356130  | MAP2K5       | Hs.114198 | mitogen-activated protein kinase kinase 5                           | Homo sapiens mitogen-activated protein kinase kinase 5 (MAP2K5), transcript variant B, mRNA [NM_002757]                                                                                                                    | 2.85718 | up | 2.92595 | up | 607.59670   | 220.19678  | 442.64365   | 133.39893  | Detected    | Detected    | Detected    | Detected    |
| 2123 | A_23_P59179   | RXRβ         | Hs.388034 | retinoid X receptor, beta                                           | Homo sapiens retinoid X receptor, beta (RXRβ), mRNA [NM_021976]                                                                                                                                                            | 2.85658 | up | 2.66175 | up | 1867.02640  | 676.76480  | 1553.91430  | 514.78520  | Detected    | Detected    | Detected    | Detected    |
| 2124 | A_32_P137266  | EFCAB7       | Hs.652324 | EF-hand calcium binding domain 7                                    | Homo sapiens EF-hand calcium binding domain 7 (EFCAB7), mRNA [NM_032437]                                                                                                                                                   | 2.85634 | up | 2.79346 | up | 1966.78260  | 712.98450  | 1449.03470  | 457.40550  | Detected    | Detected    | Detected    | Detected    |
| 2125 | A_33_P3437283 | LOC643551    | Hs.513081 | hypothetical LOC643551                                              | Homo sapiens cDNA FLJ46123 fis, clone TEST12039738 [AK128004]                                                                                                                                                              | 2.85463 | up | 3.50278 | up | 132.71692   | 48.14031   | 61.36118    | 15.44709   | Detected    | Detected    | Detected    | Compromised |
| 2126 | A_24_P104538  |              | Hs.559259 |                                                                     | Nucleosome-remodeling factor subunit BPTF (Bromodomain and PHD finger-containing transcription factor) (Fetal Alzheimer antigen) (Fetal Alz-50 clone 1 protein) [Source:UniProtKB/Swiss-Prot;Acc:Q12830] [ENST00000342979] | 2.85400 | up | 2.74528 | up | 103.08518   | 37.40027   | 72.01312    | 23.13080   | Detected    | Detected    | Detected    | Detected    |
| 2127 | A_23_P45955   | TEKT2        | Hs.127111 | tektin 2 (testicular)                                               | Homo sapiens tektin 2 (testicular) (TEKT2), mRNA [NM_014486]                                                                                                                                                               | 2.85326 | up | 2.87527 | up | 60.55796    | 21.97670   | 58.01646    | 17.79255   | Detected    | Detected    | Detected    | Detected    |
| 2128 | A_23_P348121  | FOSL2        | Hs.220971 | FOS-like antigen 2                                                  | Homo sapiens FOS-like antigen 2 (FOSL2), mRNA [NM_005253]                                                                                                                                                                  | 2.85323 | up | 2.74325 | up | 531.49774   | 192.88467  | 559.59960   | 179.87769  | Detected    | Detected    | Detected    | Detected    |
| 2129 | A_23_P83798   | ALX1         | Hs.41683  | ALX homeobox 1                                                      | Homo sapiens ALX homeobox 1 (ALX1), mRNA [NM_006982]                                                                                                                                                                       | 2.85273 | up | 2.78617 | up | 289.79892   | 105.18860  | 255.48160   | 80.85695   | Detected    | Detected    | Detected    | Detected    |
| 2130 | A_23_P91552   | FTCD         | Hs.415846 | formiminotransferase cyclodeaminase                                 | Homo sapiens formiminotransferase cyclodeaminase (FTCD), transcript variant A, mRNA [NM_206965]                                                                                                                            | 2.85271 | up | 1.68439 | up | 24.26622    | 8.80801    | 24.03099    | 12.58043   | Detected    | Compromised | Detected    | Compromised |
| 2131 | A_24_P129277  | NOD1         | Hs.405153 | nucleotide-binding oligomerization domain containing 1              | Homo sapiens nucleotide-binding oligomerization domain containing 1 (NOD1), mRNA [NM_006092]                                                                                                                               | 2.85170 | up | 2.81443 | up | 544.28796   | 197.63246  | 301.43228   | 94.44206   | Detected    | Detected    | Detected    | Detected    |
| 2132 | A_23_P200138  | SLAMF8       | Hs.438683 | SLAM family member 8                                                | Homo sapiens SLAM family member 8 (SLAMF8), mRNA [NM_020125]                                                                                                                                                               | 2.85155 | up | 2.72702 | up | 1115.08510  | 404.91095  | 1090.07080  | 352.47780  | Detected    | Detected    | Detected    | Detected    |
| 2133 | A_33_P3295261 | LMOD1        | Hs.519075 | leiomodlin 1 (smooth muscle)                                        | Homo sapiens leiomodlin 1 (smooth muscle) (LMOD1), mRNA [NM_012134]                                                                                                                                                        | 2.85017 | up | 1.49264 | up | 9.36807     | 3.40340    | 16.82253    | 9.93805    | Compromised | Compromised | Detected    | Compromised |
| 2134 | A_24_P262201  | SULT1A4      | Hs.460558 | sulfotransferase family, cytosolic, 1A, phenol-preferring, member 4 | Homo sapiens sulfotransferase family, cytosolic, 1A, phenol-preferring, member 4 (SULT1A4), transcript variant 1, mRNA [NM_001017389]                                                                                      | 2.84893 | up | 2.86092 | up | 2390.93970  | 869.00050  | 2478.21460  | 763.83234  | Detected    | Detected    | Detected    | Detected    |

|      |               |           |           |                                                                           |                                                                                                                                         |         |    |         |             |            |             |            |          |             |          |             |
|------|---------------|-----------|-----------|---------------------------------------------------------------------------|-----------------------------------------------------------------------------------------------------------------------------------------|---------|----|---------|-------------|------------|-------------|------------|----------|-------------|----------|-------------|
| 2135 | A_33_P3298105 | SPATA13   | Hs.595391 | spermatogenesis associated 13                                             | Homo sapiens spermatogenesis associated 13 (SPATA13), transcript variant 1, mRNA [NM_001166271]                                         | 2.84874 | up | 2.00677 | 172.57828   | 62.72873   | 112.36742   | 49.37506   | Detected | Detected    | Detected | Detected    |
| 2136 | A_23_P158277  | TMCO4     | Hs.656313 | transmembrane and coiled-coil domains 4                                   | Homo sapiens transmembrane and coiled-coil domains 4 (TMCO4), mRNA [NM_181719]                                                          | 2.84738 | up | 2.46315 | 1554.97270  | 565.47040  | 1804.99320  | 646.17500  | Detected | Detected    | Detected | Detected    |
| 2137 | A_24_P71468   | QPCT      | Hs.79033  | glutaminyl-peptide cyclotransferase                                       | Homo sapiens glutaminyl-peptide cyclotransferase (QPCT), mRNA [NM_012413]                                                               | 2.84510 | up | 3.16925 | 6975.57760  | 2538.72240 | 5833.95560  | 1623.20230 | Detected | Detected    | Detected | Detected    |
| 2138 | A_23_P250982  | ISOC1     | Hs.483296 | isochorismatase domain containing 1                                       | Homo sapiens isochorismatase domain containing 1 (ISOC1), mRNA [NM_016048]                                                              | 2.84457 | up | 2.92520 | 1969.87540  | 717.06067  | 1481.04830  | 446.45620  | Detected | Detected    | Detected | Detected    |
| 2139 | A_23_P119907  | ANKZF1    | Hs.437647 | ankyrin repeat and zinc finger domain containing 1                        | Homo sapiens ankyrin repeat and zinc finger domain containing 1 (ANKZF1), transcript variant 1, mRNA [NM_018089]                        | 2.84136 | up | 2.56693 | 736.00660   | 268.21878  | 589.90080   | 202.64246  | Detected | Detected    | Detected | Detected    |
| 2140 | A_23_P52986   | VWCE      | Hs.606640 | von Willebrand factor C and EGF domains                                   | Homo sapiens von Willebrand factor C and EGF domains (VWCE), mRNA [NM_152718]                                                           | 2.84016 | up | 2.64208 | 5303.60250  | 1933.57520 | 4788.86400  | 1598.27890 | Detected | Detected    | Detected | Detected    |
| 2141 | A_23_P146077  | ZNF395    | Hs.435535 | zinc finger protein 395                                                   | Homo sapiens zinc finger protein 395 (ZNF395), mRNA [NM_018660]                                                                         | 2.83982 | up | 2.68021 | 10988.08700 | 4006.48800 | 11013.39400 | 3623.41280 | Detected | Detected    | Detected | Detected    |
| 2142 | A_24_P184305  | BBS1      | Hs.502915 | Bardet-Biedl syndrome 1                                                   | Homo sapiens Bardet-Biedl syndrome 1 (BBS1), mRNA [NM_024645]                                                                           | 2.83964 | up | 3.44616 | 240.09296   | 87.54874   | 168.84958   | 43.20460   | Detected | Detected    | Detected | Detected    |
| 2143 | A_33_P3290707 | MME       | Hs.307734 | membrane metallo-endopeptidase                                            | Homo sapiens membrane metallo-endopeptidase (MME), transcript variant 2b, mRNA [NM_007289]                                              | 2.83934 | up | 4.87579 | 2849.60500  | 1039.20120 | 3660.71480  | 662.04380  | Detected | Detected    | Detected | Detected    |
| 2144 | A_24_P241815  | JUNB      | Hs.25292  | jun B proto-oncogene                                                      | Homo sapiens jun B proto-oncogene (JUNB), mRNA [NM_002229]                                                                              | 2.83714 | up | 2.57049 | 654.95770   | 239.03748  | 681.14966   | 233.66388  | Detected | Detected    | Detected | Detected    |
| 2145 | A_24_P373844  | KCTD15    | Hs.221873 | potassium channel tetramerisation domain containing 15                    | Homo sapiens potassium channel tetramerisation domain containing 15 (KCTD15), transcript variant 1, mRNA [NM_024076]                    | 2.83647 | up | 2.45212 | 387.38590   | 141.41602  | 241.98073   | 87.01706   | Detected | Detected    | Detected | Detected    |
| 2146 | A_23_P137238  | KDM5D     | Hs.80358  | lysine (K)-specific demethylase 5D                                        | Homo sapiens lysine (K)-specific demethylase 5D (KDM5D), transcript variant 2, mRNA [NM_004653]                                         | 2.83643 | up | 6.33547 | 282.81165   | 103.24251  | 234.84654   | 32.68670   | Detected | Detected    | Detected | Detected    |
| 2147 | A_23_P105002  | ROM1      | Hs.281564 | retinal outer segment membrane protein 1                                  | Homo sapiens retinal outer segment membrane protein 1 (ROM1), mRNA [NM_000327]                                                          | 2.83576 | up | 2.78200 | 5963.19240  | 2177.42240 | 4960.14600  | 1572.18270 | Detected | Detected    | Detected | Detected    |
| 2148 | A_23_P362228  | C1orf213  | Hs.61884  | chromosome 1 open reading frame 213                                       | Homo sapiens chromosome 1 open reading frame 213 (C1orf213), transcript variant 1, mRNA [NM_138479]                                     | 2.83385 | up | 2.35285 | 2012.35950  | 735.29560  | 1519.62040  | 569.51544  | Detected | Detected    | Detected | Detected    |
| 2149 | A_33_P3245517 | LOC441666 |           | zinc finger protein 91 pseudogene                                         | Homo sapiens zinc finger protein 91 pseudogene (LOC441666), non-coding RNA [NR_024380]                                                  | 2.83230 | up | 3.01200 | 21.32151    | 7.79493    | 30.25097    | 8.85625    | Detected | Compromised | Detected | Compromised |
| 2150 | A_33_P3364651 | LOC389634 | Hs.434403 | hypothetical LOC389634                                                    | Homo sapiens cDNA FLJ90405 fis, clone NT2RP200609 [AK074886]                                                                            | 2.83220 | up | 1.76312 | 56.83136    | 20.77771   | 57.79311    | 28.90414   | Detected | Detected    | Detected | Detected    |
| 2151 | A_24_P46093   | SLC6A6    | Hs.529488 | solute carrier family 6 (neurotransmitter transporter, taurine), member 6 | Homo sapiens solute carrier family 6 (neurotransmitter transporter, taurine), member 6 (SLC6A6), transcript variant 1, mRNA [NM_003043] | 2.83056 | up | 3.08243 | 6213.41400  | 2272.95650 | 5522.11960  | 1579.71250 | Detected | Detected    | Detected | Detected    |
| 2152 | A_33_P3358731 | PCSK5     | Hs.368542 | proprotein convertase subtilisin/kexin type 5                             | Homo sapiens proprotein convertase subtilisin/kexin type 5 (PCSK5), mRNA [NM_006200]                                                    | 2.82958 | up | 2.38280 | 299.80547   | 109.63779  | 261.85168   | 96.90212   | Detected | Detected    | Detected | Detected    |
| 2153 | A_23_P217009  | C9orf24   | Hs.50334  | chromosome 9 open reading frame 24                                        | Homo sapiens chromosome 9 open reading frame 24 (C9orf24), transcript variant 1, mRNA [NM_032596]                                       | 2.82904 | up | 3.24058 | 376.94827   | 137.96715  | 358.16437   | 97.45956   | Detected | Detected    | Detected | Detected    |
| 2154 | A_23_P329375  | POU6F1    | Hs.555886 | POU class 6 homeobox 1                                                    | Homo sapiens POU class 6 homeobox 1 (POU6F1), transcript variant 1, mRNA [NM_002702]                                                    | 2.82796 | up | 2.62274 | 469.63860   | 171.95833  | 342.09560   | 115.01604  | Detected | Detected    | Detected | Detected    |
| 2155 | A_24_P394368  | WDR19     | Hs.438482 | WD repeat domain 19                                                       | Homo sapiens WD repeat domain 19 (WDR19), mRNA [NM_025132]                                                                              | 2.82750 | up | 2.90541 | 289.15155   | 105.89030  | 333.16425   | 101.11532  | Detected | Detected    | Detected | Detected    |
| 2156 | A_23_P96369   | CXorf57   | Hs.274267 | chromosome X open reading frame 57                                        | Homo sapiens chromosome X open reading frame 57 (CXorf57), mRNA [NM_018015]                                                             | 2.82657 | up | 2.93306 | 1024.83020  | 375.42640  | 806.11050   | 242.34772  | Detected | Detected    | Detected | Detected    |
| 2157 | A_23_P1014    | C1orf97   |           | chromosome 1 open reading frame 97                                        | Homo sapiens chromosome 1 open reading frame 97 (C1orf97), non-coding RNA [NR_026761]                                                   | 2.82626 | up | 2.63448 | 3694.27400  | 1353.47310 | 3149.08100  | 1054.03220 | Detected | Detected    | Detected | Detected    |
| 2158 | A_33_P3384287 | PALM      | Hs.631841 | paralemmin                                                                | Homo sapiens paralemmin (PALM), transcript variant 1, mRNA [NM_002579]                                                                  | 2.82510 | up | 2.83828 | 1933.89600  | 708.81530  | 1793.61410  | 557.23640  | Detected | Detected    | Detected | Detected    |
| 2159 | A_33_P3298850 | SLC16A8   | Hs.270285 | solute carrier family 16, member 8 (monocarboxylic acid transporter 3)    | Homo sapiens solute carrier family 16, member 8 (monocarboxylic acid transporter 3) (SLC16A8), mRNA [NM_013356]                         | 2.82361 | up | 1.75698 | 49.02918    | 17.97970   | 49.19855    | 24.69163   | Detected | Compromised | Detected | Detected    |
| 2160 | A_33_P3262789 | REEP6     | Hs.76277  | receptor accessory protein 6                                              | Homo sapiens receptor accessory protein 6 (REEP6), mRNA [NM_138393]                                                                     | 2.82265 | up | 2.68258 | 1256.40090  | 460.89743  | 1352.45360  | 444.56552  | Detected | Detected    | Detected | Detected    |
| 2161 | A_24_P47988   | ELL3      | Hs.706346 | elongation factor RNA polymerase II-like 3                                | Homo sapiens elongation factor RNA polymerase II-like 3 (ELL3), mRNA [NM_025165]                                                        | 2.82173 | up | 3.35288 | 103.93689   | 38.14064   | 124.68980   | 32.79282   | Detected | Detected    | Detected | Detected    |
| 2162 | A_23_P424002  | POU2F1    | Hs.493649 | POU class 2 homeobox 1                                                    | Homo sapiens POU class 2 homeobox 1 (POU2F1), mRNA [NM_002697]                                                                          | 2.81948 | up | 3.18485 | 3100.15900  | 1138.53860 | 1364.88090  | 377.89460  | Detected | Detected    | Detected | Detected    |
| 2163 | A_24_P313993  | CAPS      | Hs.584744 | calcyphosine                                                              | Homo sapiens calcyphosine (CAPS), transcript variant 1, mRNA [NM_004058]                                                                | 2.81911 | up | 2.28949 | 447.17984   | 164.24948  | 454.80234   | 175.16560  | Detected | Detected    | Detected | Detected    |
| 2164 | A_33_P3301782 | LOC220930 | Hs.372654 | hypothetical LOC220930                                                    | Homo sapiens hypothetical LOC220930 (LOC220930), non-coding RNA [NR_024284]                                                             | 2.81844 | up | 2.86892 | 168.16254   | 61.78086   | 105.26550   | 32.35434   | Detected | Detected    | Detected | Detected    |
| 2165 | A_23_P259207  | THNSL2    | Hs.516179 | threonine synthase-like 2 (S. cerevisiae)                                 | Homo sapiens threonine synthase-like 2 (S. cerevisiae) (THNSL2), mRNA [NM_018271]                                                       | 2.81832 | up | 2.39469 | 977.65640   | 359.19340  | 969.96200   | 357.16638  | Detected | Detected    | Detected | Detected    |



|      |               |           |           |                                                                                                            |                                                                                                                                                                                                                                                          |         |    |         |    |             |             |             |             |          |             |             |             |
|------|---------------|-----------|-----------|------------------------------------------------------------------------------------------------------------|----------------------------------------------------------------------------------------------------------------------------------------------------------------------------------------------------------------------------------------------------------|---------|----|---------|----|-------------|-------------|-------------|-------------|----------|-------------|-------------|-------------|
| 2166 | A_24_P16856   |           | Hs.522572 |                                                                                                            | Splicing factor, arginine/serine-rich 17A (Protein XE7)/B-lymphocyte antigen(721P) [Source:UniProtKB/Swiss-Prot;Acc:Q02040] [ENST0000381261]                                                                                                             | 2.81540 | up | 1.78949 | up | 18.40249    | 6.76814     | 18.31533    | 9.02510     | Detected | Compromised | Detected    | Compromised |
| 2167 | A_32_P8156    | C10orf107 | Hs.673160 | chromosome 10 open reading frame 107                                                                       | Homo sapiens chromosome 10 open reading frame 107 (C10orf107), mRNA [NM_173554]                                                                                                                                                                          | 2.81480 | up | 3.08553 | up | 147.18945   | 54.14541    | 152.01820   | 43.44410    | Detected | Detected    | Detected    | Detected    |
| 2168 | A_32_P213831  | FAM40B    | Hs.489888 | family with sequence similarity 40, member B                                                               | Homo sapiens family with sequence similarity 40, member B (FAM40B), transcript variant 1, mRNA [NM_020704]                                                                                                                                               | 2.81409 | up | 3.30103 | up | 129.63658   | 47.70049    | 152.43607   | 40.71959    | Detected | Detected    | Detected    | Detected    |
| 2169 | A_23_P100386  | IL34      | Hs.461214 | interleukin 34                                                                                             | Homo sapiens interleukin 34 (IL34), mRNA [NM_152456]                                                                                                                                                                                                     | 2.81361 | up | 3.22645 | up | 129.99280   | 47.83975    | 83.53969    | 22.83147    | Detected | Detected    | Detected    | Detected    |
| 2170 | A_33_P3310552 |           | Hs.654630 |                                                                                                            | Formin-like protein 2 (Formin homology 2 domain-containing protein 2) [Source:UniProtKB/Swiss-Prot;Acc:Q96PY5] [ENST0000421344]                                                                                                                          | 2.81350 | up | 2.86084 | up | 141.73060   | 52.16145    | 128.23239   | 39.52482    | Detected | Detected    | Detected    | Detected    |
| 2171 | A_33_P3252099 | ANKLE1    | Hs.721610 | ankyrin repeat and LEM domain containing 1                                                                 | Homo sapiens ankyrin repeat and LEM domain containing 1 (ANKLE1), mRNA [NM_152363]                                                                                                                                                                       | 2.81219 | up | 4.38244 | up | 57.83297    | 21.29430    | 51.61974    | 10.38640    | Detected | Detected    | Detected    | Compromised |
| 2172 | A_24_P120934  | GADD45G   | Hs.9701   | growth arrest and DNA-damage-inducible, gamma                                                              | Homo sapiens growth arrest and DNA-damage-inducible, gamma (GADD45G), mRNA [NM_006705]                                                                                                                                                                   | 2.81173 | up | 3.37300 | up | 115.22611   | 42.43369    | 148.78069   | 38.89514    | Detected | Detected    | Detected    | Detected    |
| 2173 | A_32_P9468    | COX19     | Hs.121593 | COX19 cytochrome c oxidase assembly homolog (S. cerevisiae)                                                | Homo sapiens COX19 cytochrome c oxidase assembly homolog (S. cerevisiae) (COX19), mRNA [NM_001031617]                                                                                                                                                    | 2.81153 | up | 2.59251 | up | 463.00964   | 170.32188   | 324.26257   | 110.29160   | Detected | Detected    | Detected    | Detected    |
| 2174 | A_23_P200143  | DCAF8     | Hs.632447 | DDB1 and CUL4 associated factor 8                                                                          | Homo sapiens DDB1 and CUL4 associated factor 8 (DCAF8), transcript variant 1, mRNA [NM_015726]                                                                                                                                                           | 2.80947 | up | 2.48546 | up | 1555.59780  | 573.33276   | 1056.15730  | 374.70392   | Detected | Detected    | Detected    | Detected    |
| 2175 | A_33_P3393175 | CAPN7     | Hs.595234 | calpain 7                                                                                                  | Homo sapiens calpain 7 (CAPN7), mRNA [NM_014236]                                                                                                                                                                                                         | 2.80876 | up | 2.69000 | up | 1040.86010  | 383.71664   | 732.46250   | 240.10382   | Detected | Detected    | Detected    | Detected    |
| 2176 | A_24_P822692  | LOC643669 | Hs.355357 | similar to mCG2980                                                                                         | PREDICTED: Homo sapiens similar to mCG2980, transcript variant 1 (LOC643669), mRNA [XM_933621]                                                                                                                                                           | 2.80801 | up | 1.50011 | up | 27.68674    | 10.20954    | 26.04203    | 15.30801    | Detected | Compromised | Detected    | Detected    |
| 2177 | A_23_P146855  | MPPED1    | Hs.159538 | metallophosphoesterase domain containing 1                                                                 | Homo sapiens metallophosphoesterase domain containing 1 (MPPED1), mRNA [NM_001044370]                                                                                                                                                                    | 2.80642 | up | 2.53648 | up | 95.71785    | 35.31615    | 16.73628    | 5.81826     | Detected | Detected    | Detected    | Compromised |
| 2178 | A_23_P140830  | ELMO3     | Hs.377416 | engulfment and cell motility 3                                                                             | Homo sapiens engulfment and cell motility 3 (ELMO3), mRNA [NM_024712]                                                                                                                                                                                    | 2.80527 | up | 2.90656 | up | 114.54050   | 42.27829    | 132.72249   | 40.26522    | Detected | Detected    | Detected    | Detected    |
| 2179 | A_23_P132237  | C22orf31  | Hs.50891  | chromosome 22 open reading frame 31                                                                        | Homo sapiens chromosome 22 open reading frame 31 (C22orf31), mRNA [NM_015370]                                                                                                                                                                            | 2.80390 | up | 3.80466 | up | 27.73865    | 10.24367    | 19.28563    | 4.46980     | Detected | Compromised | Detected    | Compromised |
| 2180 | A_24_P353103  | ZNF599    | Hs.590961 | zinc finger protein 599                                                                                    | Homo sapiens zinc finger protein 599 (ZNF599), mRNA [NM_001007248]                                                                                                                                                                                       | 2.80214 | up | 2.81265 | up | 76.48120    | 28.26169    | 51.81128    | 16.24329    | Detected | Detected    | Detected    | Compromised |
| 2181 | A_33_P3291816 | CLDN22    | Hs.333179 | claudin 22                                                                                                 | Homo sapiens claudin 22 (CLDN22), mRNA [NM_00111319]                                                                                                                                                                                                     | 2.80145 | up | 2.97344 | up | 70.48438    | 26.05211    | 60.78074    | 18.02488    | Detected | Detected    | Detected    | Detected    |
| 2182 | A_32_P8221    | GRM8      | Hs.449625 | glutamate receptor, metabotropic 8                                                                         | Homo sapiens glutamate receptor, metabotropic 8 (GRM8), transcript variant 1, mRNA [NM_000845]                                                                                                                                                           | 2.80007 | up | 1.53823 | up | 15.58556    | 5.76350     | 9.35802     | 5.36448     | Detected | Compromised | Compromised | Compromised |
| 2183 | A_23_P213014  | SLC2A9    | Hs.656895 | solute carrier family 2 (facilitated glucose transporter), member 9                                        | Homo sapiens solute carrier family 2 (facilitated glucose transporter), member 9 (SLC2A9), transcript variant 2, mRNA [NM_001001290]                                                                                                                     | 2.79836 | up | 2.49857 | up | 55.15659    | 20.40927    | 38.86599    | 13.71653    | Detected | Detected    | Detected    | Compromised |
| 2184 | A_32_P415151  | WDR27     | Hs.131903 | WD repeat domain 27                                                                                        | Homo sapiens WD repeat domain 27 (WDR27), mRNA [NM_182552]                                                                                                                                                                                               | 2.79830 | up | 1.52642 | up | 38.49739    | 14.24524    | 38.15366    | 22.04081    | Detected | Compromised | Detected    | Detected    |
| 2185 | A_33_P3241756 |           | Hs.597664 |                                                                                                            | Inhibitor of nuclear factor kappa-B kinase subunit beta (I-kappa-B-kinase beta)/IKK-beta/IKK-beta/EC 2.7.11.10/I-kappa-B kinase 2/IKK2/Nuclear factor NF-kappa-B inhibitor kinase beta/NFKBKB [Source:UniProtKB/Swiss-Prot;Acc:O14920] [ENST00000379708] | 2.79713 | up | 1.70783 | up | 12.59193    | 4.66137     | 14.43501    | 7.45312     | Detected | Compromised | Detected    | Compromised |
| 2186 | A_33_P3225487 | HSD17B7   | Hs.492925 | hydroxysteroid (17-beta) dehydrogenase 7                                                                   | Homo sapiens hydroxysteroid (17-beta) dehydrogenase 7 (HSD17B7), mRNA [NM_016371]                                                                                                                                                                        | 2.79605 | up | 2.44941 | up | 290.94156   | 107.74419   | 289.11620   | 104.08241   | Detected | Detected    | Detected    | Detected    |
| 2187 | A_23_P142830  | PLA2R1    | Hs.410477 | phospholipase A2 receptor 1, 180kDa                                                                        | Homo sapiens phospholipase A2 receptor 1, 180kDa (PLA2R1), transcript variant 1, mRNA [NM_007366]                                                                                                                                                        | 2.79600 | up | 3.49108 | up | 148.81900   | 55.11295    | 125.71582   | 31.75380    | Detected | Detected    | Detected    | Detected    |
| 2188 | A_23_P87545   | IFITM3    | Hs.374650 | interferon induced transmembrane protein 3 (1-8U)                                                          | Homo sapiens interferon induced transmembrane protein 3 (1-8U) (IFITM3), mRNA [NM_021034]                                                                                                                                                                | 2.79539 | up | 2.62922 | up | 54624.94500 | 20234.01400 | 64728.22000 | 21708.58800 | Detected | Detected    | Detected    | Detected    |
| 2189 | A_24_P48057   | IRX5      | Hs.435730 | iroquois homeobox 5                                                                                        | Homo sapiens iroquois homeobox 5 (IRX5), mRNA [NM_005853]                                                                                                                                                                                                | 2.79518 | up | 2.62417 | up | 1442.10110  | 534.21950   | 1232.52540  | 414.18046   | Detected | Detected    | Detected    | Detected    |
| 2190 | A_33_P3417452 | ZGLP1     | Hs.709296 | zinc finger, GATA-like protein 1                                                                           | Homo sapiens zinc finger, GATA-like protein 1 (ZGLP1), mRNA [NM_001103167]                                                                                                                                                                               | 2.79458 | up | 2.54793 | up | 756.55300   | 280.32110   | 674.41170   | 233.40129   | Detected | Detected    | Detected    | Detected    |
| 2191 | A_23_P500410  | ATP6V1G2  | Hs.249227 | ATPase, H+ transporting, lysosomal 13kDa, V1 subunit G2 (ATP6V1G2), transcript variant 1, mRNA [NM_130463] | Homo sapiens ATPase, H+ transporting, lysosomal 13kDa, V1 subunit G2 (ATP6V1G2), transcript variant 1, mRNA [NM_130463]                                                                                                                                  | 2.79277 | up | 4.04675 | up | 369.15085   | 136.86820   | 388.91280   | 84.74439    | Detected | Detected    | Detected    | Detected    |
| 2192 | A_24_P330518  | CA12      | Hs.210995 | carbonic anhydrase XII                                                                                     | Homo sapiens carbonic anhydrase XII (CA12), transcript variant 1, mRNA [NM_001218]                                                                                                                                                                       | 2.79082 | up | 2.46093 | up | 4428.40000  | 1643.03880  | 2400.52400  | 860.14606   | Detected | Detected    | Detected    | Detected    |

|      |               |              |           |                                                                                               |                                                                                                                                                                                                                                     |         |    |         |    |            |            |            |            |          |             |             |             |
|------|---------------|--------------|-----------|-----------------------------------------------------------------------------------------------|-------------------------------------------------------------------------------------------------------------------------------------------------------------------------------------------------------------------------------------|---------|----|---------|----|------------|------------|------------|------------|----------|-------------|-------------|-------------|
| 2193 | A_23_P361820  | ATG2A        | Hs.370671 | ATG2 autophagy related 2 homolog A (S. cerevisiae)                                            | Homo sapiens ATG2 autophagy related 2 homolog A (S. cerevisiae) (ATG2A), mRNA [NM_015104]                                                                                                                                           | 2.78862 | up | 2.23456 | up | 1221.41470 | 453.53030  | 1219.88320 | 481.38455  | Detected | Detected    | Detected    | Detected    |
| 2194 | A_24_P921155  | C3orf17      | Hs.591288 | chromosome 3 open reading frame 17                                                            | Homo sapiens chromosome 3 open reading frame 17 (C3orf17), transcript variant 1, mRNA [NM_015412]                                                                                                                                   | 2.78820 | up | 2.73545 | up | 731.55910  | 271.68024  | 814.09863  | 262.42978  | Detected | Detected    | Detected    | Detected    |
| 2195 | A_32_P141768  | AGPAT4       | Hs.353175 | 1-acylglycerol-3-phosphate O-acyltransferase 4 (lysophosphatidic acid acyltransferase, delta) | Homo sapiens 1-acylglycerol-3-phosphate O-acyltransferase 4 (lysophosphatidic acid acyltransferase, delta) (AGPAT4), mRNA [NM_020133]                                                                                               | 2.78668 | up | 2.52203 | up | 2407.74370 | 894.65594  | 2052.66110 | 717.68190  | Detected | Detected    | Detected    | Detected    |
| 2196 | A_33_P3298455 |              | Hs.648259 |                                                                                               | EM:AC005003.4 protein [Source:UniProtKB/TrEMBL;Acc:Q6ICM0] [ENST00000436050]                                                                                                                                                        | 2.78618 | up | 2.20778 | up | 43.11263   | 16.02244   | 37.16148   | 14.84233   | Detected | Compromised | Detected    | Compromised |
| 2197 | A_23_P70897   | ZCWPW1       | Hs.105191 | zinc finger, CW type with PWWP domain 1                                                       | Homo sapiens zinc finger, CW type with PWWP domain 1 (ZCWPW1), mRNA [NM_017984]                                                                                                                                                     | 2.78484 | up | 2.73343 | up | 1729.24790 | 642.96826  | 1232.76500 | 397.68330  | Detected | Detected    | Detected    | Detected    |
| 2198 | A_33_P3399267 | IL15RA       | Hs.524117 | interleukin 15 receptor, alpha                                                                | Homo sapiens interleukin 15 receptor, alpha (IL15RA), transcript variant 2, mRNA [NM_172200]                                                                                                                                        | 2.78450 | up | 5.36169 | up | 27.45525   | 10.20966   | 68.09969   | 11.19977   | Detected | Compromised | Detected    | Compromised |
| 2199 | A_24_P319364  | F11R         | Hs.517293 | F11 receptor                                                                                  | Homo sapiens F11 receptor (F11R), mRNA [NM_016946]                                                                                                                                                                                  | 2.78410 | up | 2.54717 | up | 265.14560  | 98.61254   | 255.14026  | 88.32552   | Detected | Detected    | Detected    | Detected    |
| 2200 | A_23_P403588  | USP47        | Hs.577256 | ubiquitin specific peptidase 47                                                               | Homo sapiens ubiquitin specific peptidase 47 (USP47), mRNA [NM_017944]                                                                                                                                                              | 2.78359 | up | 2.74113 | up | 1381.58250 | 513.93146  | 943.29740  | 303.44812  | Detected | Detected    | Detected    | Detected    |
| 2201 | A_23_P422933  | ARHGAP20     | Hs.6136   | Rho GTPase activating protein 20                                                              | Homo sapiens Rho GTPase activating protein 20 (ARHGAP20), mRNA [NM_020809]                                                                                                                                                          | 2.78351 | up | 3.43687 | up | 65.14198   | 24.23267   | 48.93725   | 12.55574   | Detected | Detected    | Detected    | Compromised |
| 2202 | A_23_P38346   | DHX58        | Hs.55918  | DEXH (Asp-Glu-X-His) box polypeptide 58                                                       | Homo sapiens DEXH (Asp-Glu-X-His) box polypeptide 58 (DHX58), mRNA [NM_024119]                                                                                                                                                      | 2.78349 | up | 2.69134 | up | 1611.72770 | 599.56354  | 1703.36390 | 558.09050  | Detected | Detected    | Detected    | Detected    |
| 2203 | A_33_P3341787 |              |           |                                                                                               | Iduronate 2-sulfatase Precursor (EC 3.1.8.13)(Alpha-L-iduronate sulfatase)(Idursulfase) [Contains Iduronate 2-sulfatase 42 kDa chain;Iduronate 2-sulfatase 14 kDa chain] [Source:UniProtKB/Swiss-Prot;Acc:P22304] [ENST00000428056] | 2.78315 | up | 2.76741 | up | 606.83923  | 225.77245  | 532.47960  | 169.66612  | Detected | Detected    | Detected    | Detected    |
| 2204 | A_23_P163075  | SLC35F4      | Hs.28280  | solute carrier family 35, member F4                                                           | Homo sapiens solute carrier family 35, member F4 (SLC35F4), mRNA [NM_001080455]                                                                                                                                                     | 2.77887 | up | 3.11182 | up | 13.67247   | 5.09461    | 25.27107   | 7.16101    | Detected | Compromised | Detected    | Compromised |
| 2205 | A_23_P374322  | C13orf31     | Hs.210586 | chromosome 13 open reading frame 31                                                           | Homo sapiens chromosome 13 open reading frame 31 (C13orf31), transcript variant 2, mRNA [NM_153218]                                                                                                                                 | 2.77831 | up | 2.42699 | up | 127.10078  | 47.36967   | 93.64394   | 34.02332   | Detected | Detected    | Detected    | Detected    |
| 2206 | A_33_P3246026 | DEFB131      | Hs.590200 | defensin, beta 131                                                                            | Homo sapiens defensin, beta 131 (DEFB131), mRNA [NM_001040448]                                                                                                                                                                      | 2.77757 | up | 3.06967 | up | 103.85009  | 38.64011   | 83.14529   | 23.88426   | Detected | Detected    | Detected    | Detected    |
| 2207 | A_23_P74252   | HSPC157      | Hs.279842 | hypothetical LOC29092                                                                         | Homo sapiens hypothetical LOC29092 (HSPC157), transcript variant 1, non-coding RNA [NR_023918]                                                                                                                                      | 2.77736 | up | 3.19576 | up | 1263.19960 | 470.94867  | 1104.07360 | 304.64136  | Detected | Detected    | Detected    | Detected    |
| 2208 | A_24_P16610   | ZNRF1        | Hs.427284 | zinc and ring finger 1                                                                        | Homo sapiens zinc and ring finger 1 (ZNRF1), mRNA [NM_032268]                                                                                                                                                                       | 2.77723 | up | 2.49279 | up | 1044.41240 | 389.39722  | 977.30680  | 345.70972  | Detected | Detected    | Detected    | Detected    |
| 2209 | A_33_P3323928 | C10orf75     | Hs.628088 | chromosome 10 open reading frame 75                                                           | Homo sapiens chromosome 10 open reading frame 75 (C10orf75), non-coding RNA [NR_026762]                                                                                                                                             | 2.77686 | up | 2.35409 | up | 55.70394   | 20.77136   | 59.42593   | 22.25967   | Detected | Detected    | Detected    | Detected    |
| 2210 | A_23_P205200  | DHRS12       | Hs.266728 | dehydrogenase/reductase (SDR family) member 12                                                | Homo sapiens dehydrogenase/reductase (SDR family) member 12 (DHRS12), transcript variant 2, mRNA [NM_024705]                                                                                                                        | 2.77644 | up | 2.85293 | up | 317.20398  | 118.29969  | 299.31012  | 92.51144   | Detected | Detected    | Detected    | Detected    |
| 2211 | A_33_P3797403 | LOC283387    | Hs.368755 | hypothetical protein LOC283387                                                                | Homo sapiens hypothetical protein LOC283387, mRNA (cDNA clone IMAGE4821676) [BC032840]                                                                                                                                              | 2.77586 | up | 3.81427 | up | 192.89774  | 71.95538   | 140.49553  | 32.48003   | Detected | Detected    | Detected    | Detected    |
| 2212 | A_33_P3271395 | LOC100129534 | Hs.655313 | small nuclear ribonucleoprotein polypeptide N pseudogene                                      | Homo sapiens small nuclear ribonucleoprotein polypeptide N pseudogene (LOC100129534), non-coding RNA [NR_024489]                                                                                                                    | 2.77557 | up | 2.36832 | up | 95.21238   | 35.52013   | 75.60004   | 28.14799   | Detected | Detected    | Detected    | Detected    |
| 2213 | A_23_P57534   | DDX17        | Hs.528305 | DEAD (Asp-Glu-Ala-Asp) box polypeptide 17                                                     | Homo sapiens DEAD (Asp-Glu-Ala-Asp) box polypeptide 17 (DDX17), transcript variant 1, mRNA [NM_006366]                                                                                                                              | 2.77516 | up | 3.30270 | up | 23.39954   | 8.73076    | 38.75468   | 10.34713   | Detected | Compromised | Detected    | Compromised |
| 2214 | A_33_P3343493 | GABBR1       | Hs.167017 | gamma-aminobutyric acid (GABA) B receptor, 1                                                  | Homo sapiens gamma-aminobutyric acid (GABA) B receptor, 1 (GABBR1), transcript variant 1, mRNA [NM_001470]                                                                                                                          | 2.77503 | up | 3.77714 | up | 22.33238   | 8.33300    | 23.91073   | 5.58207    | Detected | Compromised | Detected    | Compromised |
| 2215 | A_23_P65598   | CABC1        | Hs.118241 | chaperone, ABC1 activity of bc1 complex homolog (S. pombe)                                    | Homo sapiens chaperone, ABC1 activity of bc1 complex homolog (S. pombe) (CABC1), nuclear gene encoding mitochondrial protein, mRNA [NM_020247]                                                                                      | 2.77344 | up | 2.40094 | up | 1976.51720 | 737.92890  | 1316.16480 | 483.38610  | Detected | Detected    | Detected    | Detected    |
| 2216 | A_23_P344194  | C12orf68     | Hs.251699 | chromosome 12 open reading frame 68                                                           | Homo sapiens chromosome 12 open reading frame 68 (C12orf68), mRNA [NM_001013635]                                                                                                                                                    | 2.77256 | up | 1.91635 | up | 19.97324   | 7.45934    | 9.99934    | 4.60109    | Detected | Compromised | Compromised | Compromised |
| 2217 | A_23_P134755  | TRPS1        | Hs.657018 | trichorhinophalangeal syndrome 1                                                              | Homo sapiens trichorhinophalangeal syndrome 1 (TRPS1), mRNA [NM_014112]                                                                                                                                                             | 2.77223 | up | 2.42554 | up | 2567.84860 | 959.12230  | 1462.15040 | 531.55676  | Detected | Detected    | Detected    | Detected    |
| 2218 | A_23_P202860  | CYP2R1       | Hs.371427 | cytochrome P450, family 2, subfamily R, polypeptide 1                                         | Homo sapiens cytochrome P450, family 2, subfamily R, polypeptide 1 (CYP2R1), mRNA [NM_024514]                                                                                                                                       | 2.77147 | up | 2.75198 | up | 7128.93070 | 2663.46300 | 5839.52700 | 1871.10490 | Detected | Detected    | Detected    | Detected    |
| 2219 | A_24_P336137  | C22orf23     | Hs.517612 | chromosome 22 open reading frame 23                                                           | Homo sapiens chromosome 22 open reading frame 23 (C22orf23), mRNA [NM_032561]                                                                                                                                                       | 2.77076 | up | 1.90123 | up | 153.30167  | 57.29025   | 152.74997  | 70.84554   | Detected | Detected    | Detected    | Detected    |

|      |               |              |           |                                                           |                                                                                                             |         |    |         |    |              |             |             |             |             |             |             |             |
|------|---------------|--------------|-----------|-----------------------------------------------------------|-------------------------------------------------------------------------------------------------------------|---------|----|---------|----|--------------|-------------|-------------|-------------|-------------|-------------|-------------|-------------|
| 2220 | A_33_P3691916 | FAM13A       | Hs.97270  | family with sequence similarity 13, member A              | Homo sapiens family with sequence similarity 13, member A (FAM13A), transcript variant 1, mRNA [NM_014883]  | 2.77056 | up | 2.40066 | up | 748.85620    | 279.87527   | 496.23404   | 182.27296   | Detected    | Detected    | Detected    | Detected    |
| 2221 | A_23_P16915   | QPCT         | Hs.79033  | glutaminyl-peptide cyclotransferase                       | Homo sapiens glutaminyl-peptide cyclotransferase (QPCT), mRNA [NM_012413]                                   | 2.76710 | up | 2.69226 | up | 4553.40200   | 1703.89990  | 4829.67400  | 1581.85290  | Detected    | Detected    | Detected    | Detected    |
| 2222 | A_24_P659836  | C22orf41     | Hs.535660 | chromosome 22 open reading frame 41                       | Homo sapiens chromosome 22 open reading frame 41 (C22orf41), mRNA [NM_001123225]                            | 2.76695 | up | 1.96860 | up | 33.44235     | 12.51495    | 30.41700    | 13.62463    | Detected    | Compromised | Detected    | Compromised |
| 2223 | A_32_P119569  | GOLGA8E      | Hs.454647 | golgi autoantigen, golgin subfamily a, 8E                 | Homo sapiens golgi autoantigen, golgin subfamily a, 8E (GOLGA8E), mRNA [NM_001012423]                       | 2.76670 | up | 2.31120 | up | 218.06116    | 81.61124    | 29.78781    | 11.36491    | Detected    | Detected    | Detected    | Compromised |
| 2224 | A_33_P3350853 | LOC202781    |           | hypothetical LOC202781                                    | Homo sapiens hypothetical LOC202781 (LOC202781), non-coding RNA [NR_028090]                                 | 2.76662 | up | 3.18085 | up | 824.39390    | 308.54532   | 388.52250   | 107.70577   | Detected    | Detected    | Detected    | Detected    |
| 2225 | A_23_P134953  | PLIN2        | Hs.3416   | perilipin 2                                               | Homo sapiens perilipin 2 (PLIN2), mRNA [NM_001122]                                                          | 2.76087 | up | 2.60113 | up | 10996.10900  | 4124.06540  | 10729.60200 | 3637.36550  | Detected    | Detected    | Detected    | Detected    |
| 2226 | A_33_P3401428 | TMEM38B      | Hs.411925 | transmembrane protein 38B                                 | Homo sapiens transmembrane protein 38B (TMEM38B), mRNA [NM_018112]                                          | 2.76037 | up | 2.83601 | up | 398.62234    | 149.52962   | 358.59387   | 111.49632   | Detected    | Detected    | Detected    | Detected    |
| 2227 | A_24_P458479  |              | Hs.567050 |                                                           | Protein FAM27E1 [Source:UniProtKB/Swiss-Prot;Acc:Q5T7N7] [ENST00000377525]                                  | 2.75972 | up | 4.06193 | up | 45.32588     | 17.00646    | 41.43237    | 8.99442     | Detected    | Compromised | Detected    | Compromised |
| 2228 | A_24_P577694  | ADCY1        | Hs.192215 | adenylate cyclase 1 (brain)                               | Homo sapiens adenylate cyclase 1 (brain) (ADCY1), mRNA [NM_021116]                                          | 2.75621 | up | 2.25716 | up | 20.22272     | 7.59733     | 8.27071     | 3.23106     | Detected    | Compromised | Compromised | Compromised |
| 2229 | A_32_P169735  | TTC8         | Hs.303055 | tetratricopeptide repeat domain 8                         | Homo sapiens tetratricopeptide repeat domain 8 (TTC8), transcript variant 1, mRNA [NM_144596]               | 2.75553 | up | 2.82769 | up | 4555.19600   | 1711.72670  | 4294.59380  | 1339.23350  | Detected    | Detected    | Detected    | Detected    |
| 2230 | A_33_P3351559 | ETNK1        | Hs.29464  | ethanolamine kinase 1                                     | Homo sapiens ethanolamine kinase 1 (ETNK1), transcript variant 1, mRNA [NM_018638]                          | 2.75355 | up | 3.10440 | up | 1019.17020   | 383.25427   | 783.29443   | 222.49100   | Detected    | Detected    | Detected    | Detected    |
| 2231 | A_23_P112061  | HGSNAT       | Hs.600384 | heparan-alpha-glucosaminide N-acetyltransferase           | Homo sapiens heparan-alpha-glucosaminide N-acetyltransferase (HGSNAT), mRNA [NM_152419]                     | 2.75193 | up | 2.69635 | up | 11915.31300  | 4483.33250  | 9373.46300  | 3065.41820  | Detected    | Detected    | Detected    | Detected    |
| 2232 | A_33_P3256914 |              | Hs.513225 |                                                           | Protein ITFG3 [Source:UniProtKB/Swiss-Prot;Acc:Q9H0X4] [ENST00000301679]                                    | 2.75034 | up | 3.36739 | up | 44.86378     | 16.89049    | 31.12515    | 8.15048     | Detected    | Compromised | Detected    | Compromised |
| 2233 | A_33_P3371718 | SAT1         | Hs.28491  | spermidine/spermine N1-acetyltransferase 1                | Homo sapiens spermidine/spermine N1-acetyltransferase 1 (SAT1), transcript variant 1, mRNA [NM_002970]      | 2.74941 | up | 2.83328 | up | 59177.38700  | 22286.92000 | 61022.78500 | 18991.91200 | Detected    | Detected    | Detected    | Detected    |
| 2234 | A_33_P3290443 | SCARNA9      |           | small Cajal body-specific RNA 9                           | Homo sapiens small Cajal body-specific RNA 9 (SCARNA9), guide RNA [NR_002569]                               | 2.74827 | up | 3.22067 | up | 3433.11430   | 1293.48750  | 2224.59000  | 609.07290   | Detected    | Detected    | Detected    | Detected    |
| 2235 | A_33_P3334688 | CPNE2        | Hs.339809 | copine II                                                 | Homo sapiens cDNA FLJ44150 fis, clone THYMU2031046, [AK126138]                                              | 2.74664 | up | 1.11909 | up | 10.86167     | 4.09475     | 12.82939    | 10.10898    | Compromised | Compromised | Detected    | Compromised |
| 2236 | A_23_P126486  | CROCC1       | Hs.631865 | ciliary rootlet coiled-coil, rootletin-like 1             | Homo sapiens ciliary rootlet coiled-coil, rootletin-like 1 (CROCC1), non-coding RNA [NR_026752]             | 2.74607 | up | 2.94759 | up | 7548.32500   | 2846.23900  | 6091.19600  | 1822.21830  | Detected    | Detected    | Detected    | Detected    |
| 2237 | A_32_P58937   | MBTD1        | Hs.656803 | mbt domain containing 1                                   | Homo sapiens mbt domain containing 1 (MBTD1), mRNA [NM_017643]                                              | 2.74495 | up | 2.48773 | up | 575.32670    | 217.02635   | 445.87460   | 158.04301   | Detected    | Detected    | Detected    | Detected    |
| 2238 | A_23_P424582  | EGFL8        | Hs.332138 | EGF-like-domain, multiple 8                               | Homo sapiens EGF-like-domain, multiple 8 (EGFL8), mRNA [NM_030652]                                          | 2.74319 | up | 2.68181 | up | 2126.77400   | 802.78480   | 2198.38480  | 722.83826   | Detected    | Detected    | Detected    | Detected    |
| 2239 | A_23_P104224  | A1CF         | Hs.499643 | APOBEC1 complementation factor                            | Homo sapiens APOBEC1 complementation factor (A1CF), transcript variant 3, mRNA [NM_138933]                  | 2.74294 | up | 1.46516 | up | 15.27172     | 5.76507     | 27.42098    | 16.50308    | Detected    | Compromised | Detected    | Detected    |
| 2240 | A_23_P104318  | DDIT4        | Hs.719970 | DNA-damage-inducible transcript 4                         | Homo sapiens DNA-damage-inducible transcript 4 (DDIT4), mRNA [NM_019058]                                    | 2.74249 | up | 2.50768 | up | 8787.71100   | 3317.90600  | 6731.84130  | 2367.15360  | Detected    | Detected    | Detected    | Detected    |
| 2241 | A_33_P3221859 | SHOX2        | Hs.55967  | short stature homeobox 2                                  | Homo sapiens short stature homeobox 2 (SHOX2), transcript variant 1, mRNA [NM_003030]                       | 2.74215 | up | 2.48845 | up | 245.83199    | 92.82827    | 254.60356   | 90.21978    | Detected    | Detected    | Detected    | Detected    |
| 2242 | A_24_P71661   | CRTAP        | Hs.719160 | cartilage associated protein                              | Homo sapiens cartilage associated protein (CRTAP), mRNA [NM_006371]                                         | 2.74195 | up | 2.68751 | up | 677.63460    | 255.89934   | 601.12555   | 197.23361   | Detected    | Detected    | Detected    | Detected    |
| 2243 | A_33_P3265429 | LOC100132653 | Hs.568145 | similar to phosphorylase kinase gamma subunit 1           | PREDICTED: Homo sapiens similar to phosphorylase kinase gamma subunit 1 (LOC100132653), mRNA [XM_001715253] | 2.74177 | up | 4.26540 | up | 15.74395     | 5.94588     | 17.84281    | 3.68867     | Detected    | Compromised | Detected    | Compromised |
| 2244 | A_23_P89780   | LAMA3        | Hs.436367 | laminin, alpha 3                                          | Homo sapiens laminin, alpha 3 (LAMA3), transcript variant 1, mRNA [NM_198129]                               | 2.74168 | up | 2.99893 | up | 142.31633    | 53.74904    | 125.89790   | 37.01841    | Detected    | Detected    | Detected    | Detected    |
| 2245 | A_24_P418044  | HLA-J        | Hs.720762 | major histocompatibility complex, class I, J (pseudogene) | Homo sapiens major histocompatibility complex, class I, J (pseudogene) (HLA-J), non-coding RNA [NR_024240]  | 2.74136 | up | 3.14531 | up | 109189.96000 | 41243.02300 | 75351.33600 | 21124.85000 | Detected    | Detected    | Detected    | Detected    |
| 2246 | A_24_P93309   | CDNF         | Hs.559067 | cerebral dopamine neurotrophic factor                     | Homo sapiens cerebral dopamine neurotrophic factor (CDNF), mRNA [NM_001029954]                              | 2.74130 | up | 2.70187 | up | 106.76208    | 40.32684    | 70.83563    | 23.11818    | Detected    | Detected    | Detected    | Detected    |
| 2247 | A_23_P9662    | IPP          | Hs.699548 | intracisternal A particle-promoted polypeptide            | Homo sapiens intracisternal A particle-promoted polypeptide (IPP), transcript variant 1, mRNA [NM_005897]   | 2.74127 | up | 2.35659 | up | 672.14680    | 253.88971   | 881.59357   | 329.87552   | Detected    | Detected    | Detected    | Detected    |
| 2248 | A_23_P350551  | C12orf57     | Hs.591045 | chromosome 12 open reading frame 57                       | Homo sapiens chromosome 12 open reading frame 57 (C12orf57), mRNA [NM_138425]                               | 2.74053 | up | 2.69612 | up | 26888.30500  | 10159.26800 | 33555.77000 | 10974.73700 | Detected    | Detected    | Detected    | Detected    |
| 2249 | A_23_P396981  | CCDC66       | Hs.476399 | coiled-coil domain containing 66                          | Homo sapiens coiled-coil domain containing 66 (CCDC66), transcript variant 2, mRNA [NM_001012506]           | 2.74043 | up | 2.23640 | up | 272.79346    | 103.07387   | 106.65109   | 42.05142    | Detected    | Detected    | Detected    | Detected    |

|      |               |           |           |                                                                                           |                                                                                                                                                        |         |    |          |    |            |            |            |            |             |             |             |             |
|------|---------------|-----------|-----------|-------------------------------------------------------------------------------------------|--------------------------------------------------------------------------------------------------------------------------------------------------------|---------|----|----------|----|------------|------------|------------|------------|-------------|-------------|-------------|-------------|
| 2250 | A_23_P304489  | FAM19A5   | Hs.438654 | family with sequence similarity 19 (chemokine (C-C motif)-like), member A5                | Homo sapiens family with sequence similarity 19 (chemokine (C-C motif)-like), member A5 (FAM19A5), transcript variant 2, mRNA [NM_015381]              | 2.74026 | up | 2.07148  | up | 106.67150  | 40.30782   | 108.21547  | 46.06533   | Detected    | Detected    | Detected    | Detected    |
| 2251 | A_33_P3327921 | RHOQ      | Hs.709193 | ras homolog gene family, member Q                                                         | Homo sapiens ras homolog gene family, member Q (RHOQ), mRNA [NM_012249]                                                                                | 2.73760 | up | 2.94244  | up | 925.88710  | 350.20456  | 631.52510  | 189.25537  | Detected    | Detected    | Detected    | Detected    |
| 2252 | A_23_P203900  | SCARB1    | Hs.709216 | scavenger receptor class B, member 1                                                      | Homo sapiens scavenger receptor class B, member 1 (SCARB1), transcript variant 1, mRNA [NM_005505]                                                     | 2.73751 | up | 2.54210  | up | 9151.40500 | 3461.51270 | 8312.78500 | 2883.49880 | Detected    | Detected    | Detected    | Detected    |
| 2253 | A_23_P103371  | ADC       | Hs.101807 | arginine decarboxylase                                                                    | Homo sapiens arginine decarboxylase (ADC), mRNA [NM_052998]                                                                                            | 2.73613 | up | 2.21314  | up | 482.97696  | 182.77731  | 413.13070  | 164.60535  | Detected    | Detected    | Detected    | Detected    |
| 2254 | A_23_P426305  | AOC3      | Hs.198241 | amine oxidase, copper containing 3 (vascular adhesion protein 1)                          | Homo sapiens amine oxidase, copper containing 3 (vascular adhesion protein 1) (AOC3), mRNA [NM_003734]                                                 | 2.73563 | up | 3.21096  | up | 152.22842  | 57.61984   | 137.09679  | 37.64936   | Detected    | Detected    | Detected    | Detected    |
| 2255 | A_24_P234732  | MXD4      | Hs.655020 | MAX dimerization protein 4                                                                | Homo sapiens MAX dimerization protein 4 (MXD4), mRNA [NM_006454]                                                                                       | 2.73452 | up | 2.16162  | up | 2188.94020 | 828.86975  | 2307.67300 | 941.37070  | Detected    | Detected    | Detected    | Detected    |
| 2256 | A_33_P3404531 | ZCWPW1    | Hs.105191 | zinc finger, CW type with PWWP domain 1                                                   | Homo sapiens zinc finger, CW type with PWWP domain 1 (ZCWPW1), mRNA [NM_017984]                                                                        | 2.73294 | up | 3.33840  | up | 223.51389  | 84.68529   | 189.96428  | 50.17631   | Detected    | Detected    | Detected    | Detected    |
| 2257 | A_23_P66766   | RPAIN     | Hs.462086 | RPA interacting protein                                                                   | Homo sapiens RPA interacting protein (RPAIN), transcript variant 4, mRNA [NM_001160246]                                                                | 2.73133 | up | 2.58567  | up | 5565.69700 | 2109.98140 | 5454.36200 | 1860.09700 | Detected    | Detected    | Detected    | Detected    |
| 2258 | A_33_P3331601 | THNSL1    | Hs.645274 | threonine synthase-like 1 (S. cerevisiae)                                                 | Homo sapiens threonine synthase-like 1 (S. cerevisiae) (THNSL1), mRNA [NM_024836]                                                                      | 2.72902 | up | 2.23738  | up | 65.70640   | 24.93071   | 48.71668   | 19.20007   | Detected    | Detected    | Detected    | Detected    |
| 2259 | A_24_P352637  | TSSK4     | Hs.314432 | testis-specific serine kinase 4                                                           | Homo sapiens testis-specific serine kinase 4 (TSSK4), mRNA [NM_174944]                                                                                 | 2.72887 | up | 4.82971  | up | 10.93978   | 4.15106    | 21.11306   | 3.85474    | Compromised | Compromised | Detected    | Compromised |
| 2260 | A_33_P3335865 | WDR35     | Hs.205427 | WD repeat domain 35                                                                       | Homo sapiens WD repeat domain 35 (WDR35), transcript variant 1, mRNA [NM_001006657]                                                                    | 2.72864 | up | 2.97966  | up | 1400.68300 | 531.52830  | 1045.45680 | 309.38882  | Detected    | Detected    | Detected    | Detected    |
| 2261 | A_23_P250629  | PSMB8     | Hs.180062 | proteasome (prosome, macropain) subunit, beta type, 8 (large multifunctional peptidase 7) | Homo sapiens proteasome (prosome, macropain) subunit, beta type, 8 (large multifunctional peptidase 7) (PSMB8), transcript variant 1, mRNA [NM_004159] | 2.72804 | up | 2.58023  | up | 3337.34890 | 1266.73000 | 3844.88770 | 1313.98380 | Detected    | Detected    | Detected    | Detected    |
| 2262 | A_24_P165205  | MORN1     | Hs.642701 | MORN repeat containing 1                                                                  | Homo sapiens MORN repeat containing 1 (MORN1), mRNA [NM_024848]                                                                                        | 2.72802 | up | 1.63692  | up | 20.52877   | 7.79199    | 21.77705   | 11.73105   | Detected    | Compromised | Detected    | Compromised |
| 2263 | A_23_P371824  | TUFT1     | Hs.489922 | tuftelin 1                                                                                | Homo sapiens tuftelin 1 (TUFT1), transcript variant 1, mRNA [NM_020127]                                                                                | 2.72652 | up | 2.98720  | up | 911.89410  | 346.23734  | 886.69170  | 261.74250  | Detected    | Detected    | Detected    | Detected    |
| 2264 | A_33_P3255544 | RNF130    | Hs.484363 | ring finger protein 130                                                                   | Homo sapiens ring finger protein 130 (RNF130), mRNA [NM_018434]                                                                                        | 2.72480 | up | 2.28081  | up | 3022.85500 | 1148.72310 | 2527.85420 | 977.30230  | Detected    | Detected    | Detected    | Detected    |
| 2265 | A_33_P3354414 | AOX1      | Hs.406238 | aldehyde oxidase 1                                                                        | Homo sapiens aldehyde oxidase 1 (AOX1), mRNA [NM_001159]                                                                                               | 2.72471 | up | 2.52420  | up | 5323.11330 | 2022.91720 | 5324.66200 | 1860.08970 | Detected    | Detected    | Detected    | Detected    |
| 2266 | A_33_P3382595 | RN7SK     | Hs.706653 | RNA, 7SK small nuclear                                                                    | Homo sapiens RNA, 7SK small nuclear (RN7SK), small nuclear RNA [NR_001445]                                                                             | 2.72448 | up | 2.39852  | up | 3720.59500 | 1414.04220 | 3145.01200 | 1156.23100 | Detected    | Detected    | Detected    | Detected    |
| 2267 | A_33_P3243502 | LOC389634 | Hs.700070 | hypothetical LOC389634                                                                    | Homo sapiens hypothetical LOC389634 (LOC389634), non-coding RNA [NR_024420]                                                                            | 2.72371 | up | 4.74931  | up | 789.77740  | 300.24545  | 655.50130  | 121.70493  | Detected    | Detected    | Detected    | Detected    |
| 2268 | A_33_P3393684 | VSIG8     | Hs.647718 | V-set and immunoglobulin domain containing 8                                              | Homo sapiens V-set and immunoglobulin domain containing 8 (VSIG8), mRNA [NM_001013661]                                                                 | 2.72363 | up | 2.75275  | up | 345.69006  | 131.42291  | 262.03317  | 83.93741   | Detected    | Detected    | Detected    | Detected    |
| 2269 | A_23_P155755  | CXCL6     | Hs.164021 | chemokine (C-X-C motif) ligand 6 (granulocyte chemotactic protein 2)                      | Homo sapiens chemokine (C-X-C motif) ligand 6 (granulocyte chemotactic protein 2) (CXCL6), mRNA [NM_002993]                                            | 2.72287 | up | 2.40006  | up | 186.20544  | 70.81077   | 261.69284  | 96.14695   | Detected    | Detected    | Detected    | Detected    |
| 2270 | A_33_P3672756 | LOC284561 | Hs.504540 | hypothetical protein LOC284561                                                            | Homo sapiens cDNA FLJ13747 fis, clone PLACE3000276 [AK023809]                                                                                          | 2.72086 | up | 10.37302 | up | 44.58916   | 16.96899   | 29.81039   | 2.53412    | Detected    | Detected    | Detected    | Compromised |
| 2271 | A_24_P476086  | KPNA5     |           | karyopherin alpha 5 (importin alpha 6)                                                    | Importin subunit alpha-6 (Karyopherin subunit alpha-5) [Source:UniProtKB/Swiss-Prot;Acc:O15131] [ENST00000368564]                                      | 2.71990 | up | 3.02876  | up | 389.28653  | 148.20027  | 247.94650  | 72.18704   | Detected    | Detected    | Detected    | Detected    |
| 2272 | A_23_P430902  | MORN4     | Hs.217409 | MORN repeat containing 4                                                                  | Homo sapiens MORN repeat containing 4 (MORN4), transcript variant 1, mRNA [NM_178832]                                                                  | 2.71953 | up | 2.33642  | up | 271.67020  | 103.43839  | 264.17780  | 99.70356   | Detected    | Detected    | Detected    | Detected    |
| 2273 | A_33_P3361991 | OR9A2     | Hs.553594 | olfactory receptor, family 9, subfamily A, member 2                                       | Homo sapiens olfactory receptor, family 9, subfamily A, member 2 (OR9A2), mRNA [NM_001001656]                                                          | 2.71925 | up | 1.43992  | up | 14.09131   | 5.36581    | 7.62735    | 4.67091    | Detected    | Compromised | Compromised | Compromised |
| 2274 | A_32_P56713   | BCR       | Hs.517461 | breakpoint cluster region                                                                 | Homo sapiens breakpoint cluster region (BCR), transcript variant 1, mRNA [NM_004327]                                                                   | 2.71884 | up | 2.38530  | up | 980.49115  | 373.41640  | 775.51580  | 286.69086  | Detected    | Detected    | Detected    | Detected    |
| 2275 | A_23_P19322   | C6orf64   | Hs.58382  | chromosome 6 open reading frame 64                                                        | Homo sapiens chromosome 6 open reading frame 64 (C6orf64), mRNA [NM_018322]                                                                            | 2.71871 | up | 2.73909  | up | 2718.09200 | 1035.22520 | 2479.50760 | 798.22240  | Detected    | Detected    | Detected    | Detected    |
| 2276 | A_33_P3394213 | GRIN3B    | Hs.660378 | glutamate receptor, ionotropic, N-methyl-D-aspartate 3B                                   | Homo sapiens glutamate receptor, ionotropic, N-methyl-D-aspartate 3B (GRIN3B), mRNA [NM_138690]                                                        | 2.71633 | up | 2.70513  | up | 512.19226  | 195.24643  | 480.25845  | 156.54953  | Detected    | Detected    | Detected    | Detected    |
| 2277 | A_33_P3353372 |           |           |                                                                                           |                                                                                                                                                        | 2.71619 | up | 7.39717  | up | 83.43985   | 31.80871   | 29.37591   | 3.50180    | Detected    | Detected    | Detected    | Compromised |
| 2278 | A_33_P3285156 | FLJ90757  | Hs.448889 | hypothetical LOC440465                                                                    | Homo sapiens hypothetical LOC440465 (FLJ90757), non-coding RNA [NR_026857]                                                                             | 2.71609 | up | 2.56625  | up | 2567.01370 | 978.62560  | 2464.60600 | 846.86456  | Detected    | Detected    | Detected    | Detected    |
| 2279 | A_24_P854492  | MIAT      | Hs.517502 | myocardial infarction associated transcript (non-protein coding)                          | Homo sapiens myocardial infarction associated transcript (non-protein coding) (MIAT), non-coding RNA [NR_003491]                                       | 2.71533 | up | 1.74883  | up | 18.45537   | 7.03774    | 17.79155   | 8.97082    | Detected    | Compromised | Detected    | Compromised |

|      |               |           |           |                                                     |                                                                                                                                                                                                                                 |         |         |    |             |             |             |             |          |             |             |             |
|------|---------------|-----------|-----------|-----------------------------------------------------|---------------------------------------------------------------------------------------------------------------------------------------------------------------------------------------------------------------------------------|---------|---------|----|-------------|-------------|-------------|-------------|----------|-------------|-------------|-------------|
| 2280 | A_32.P117170  | NAPEPLD   | Hs.324271 | N-acyl phosphatidylethanolamine phospholipase D     | Homo sapiens N-acyl phosphatidylethanolamine phospholipase D (NAPEPLD), transcript variant 1, mRNA [NM_001122838]                                                                                                               | 2.71370 | 2.46465 | up | 435.82000   | 166.29459   | 420.32336   | 150.38136   | Detected | Detected    | Detected    | Detected    |
| 2281 | A_33.P329367  |           |           |                                                     | Obscurin (EC 2.7.11.1)(Obscurin-myosin light chain kinase)(Obscurin-MLCK)(Obscurin-RhoGEF) [Source:UniProtKB/Swiss-Prot;Acc:Q5VST9] [ENST00000366706]                                                                           | 2.71332 | 2.46797 | up | 99.30269    | 37.89597    | 59.26614    | 21.17544    | Detected | Detected    | Detected    | Detected    |
| 2282 | A_23.P154740  | PLK1S1    | Hs.187635 | polo-like kinase 1 substrate 1                      | Homo sapiens polo-like kinase 1 substrate 1 (PLK1S1), transcript variant 1, mRNA [NM_018474]                                                                                                                                    | 2.71274 | 2.80582 | up | 3497.07180  | 1334.84000  | 3019.56180  | 948.96375   | Detected | Detected    | Detected    | Detected    |
| 2283 | A_33.P3326922 |           | Hs.689400 |                                                     | CDNA FLJ26465 fis. clone KDN04238 [Source:UniProtKB/TrEMBL;Acc:Q6ZP60] [ENST0000037571]                                                                                                                                         | 2.71226 | 3.48239 | up | 16.59821    | 6.33671     | 15.58729    | 3.94692     | Detected | Compromised | Detected    | Compromised |
| 2284 | A_33.P3307990 | MASP2     | Hs.655645 | mannan-binding lectin serine peptidase 2            | Homo sapiens mannan-binding lectin serine peptidase 2 (MASP2), transcript variant 1, mRNA [NM_006610]                                                                                                                           | 2.71088 | 2.11353 | up | 43.35148    | 16.55871    | 10.38281    | 4.33183     | Detected | Compromised | Compromised | Compromised |
| 2285 | A_23.P422851  | CABLES1   | Hs.11108  | Cdk5 and Abl enzyme substrate 1                     | Homo sapiens Cdk5 and Abl enzyme substrate 1 (CABLES1), transcript variant 1, mRNA [NM_138375]                                                                                                                                  | 2.70953 | 2.53192 | up | 4764.50630  | 1820.77820  | 4998.65700  | 1740.88350  | Detected | Detected    | Detected    | Detected    |
| 2286 | A_23.P7827    | FAM26F    | Hs.381220 | family with sequence similarity 26, member F        | Homo sapiens family with sequence similarity 26, member F (FAM26F), mRNA [NM_0210819]                                                                                                                                           | 2.70915 | 2.55861 | up | 226.72880   | 86.65763    | 223.49586   | 77.02497    | Detected | Detected    | Detected    | Detected    |
| 2287 | A_33.P387096  | LOC148987 | Hs.158890 | hypothetical protein LOC148987                      | Homo sapiens hypothetical protein LOC148987, mRNA (cDNA clone IMAGE:4830261) [BC040313]                                                                                                                                         | 2.70913 | 2.80399 | up | 48.53178    | 18.54938    | 48.41615    | 15.22578    | Detected | Detected    | Detected    | Detected    |
| 2288 | A_33.P3332362 |           |           |                                                     | POU domain, class 2, transcription factor 2 (Octamer-binding transcription factor 2)(Oct-2)(OTF-2)(Lymphoid-restricted immunoglobulin octamer-binding protein NF-A2) [Source:UniProtKB/Swiss-Prot;Acc:P09086] [ENST00000342301] | 2.70703 | 3.08904 | up | 34.57213    | 13.22411    | 66.13220    | 18.87793    | Detected | Compromised | Detected    | Detected    |
| 2289 | A_33.P3715177 | MEGF8     | Hs.132483 | multiple EGF-like-domains 8                         | Homo sapiens multiple EGF-like-domains 8 (MEGF8), mRNA [NM_001410]                                                                                                                                                              | 2.70483 | 2.88745 | up | 2074.76760  | 794.25850   | 1385.85960  | 423.22380   | Detected | Detected    | Detected    | Detected    |
| 2290 | A_23.P149695  | C1orf203  | Hs.664752 | chromosome 1 open reading frame 203                 | Homo sapiens chromosome 1 open reading frame 203 (C1orf203), transcript variant 3, non-coding RNA [NR_024126]                                                                                                                   | 2.70453 | 2.45802 | up | 96.68340    | 37.01635    | 92.72573    | 33.26439    | Detected | Detected    | Detected    | Detected    |
| 2291 | A_23.P68486   | C20orf108 | Hs.143736 | chromosome 20 open reading frame 108                | Homo sapiens chromosome 20 open reading frame 108 (C20orf108), mRNA [NM_080821]                                                                                                                                                 | 2.70418 | 2.67942 | up | 12347.75300 | 4728.08700  | 12067.50500 | 3971.38430  | Detected | Detected    | Detected    | Detected    |
| 2292 | A_23.P256542  | FAM162A   | Hs.584881 | family with sequence similarity 162, member A       | Homo sapiens family with sequence similarity 162, member A (FAM162A), mRNA [NM_014367]                                                                                                                                          | 2.70333 | 2.74521 | up | 23549.29900 | 9020.10450  | 13823.70800 | 4440.32130  | Detected | Detected    | Detected    | Detected    |
| 2293 | A_33.P3333054 | GOLSYN    | Hs.390738 | Golgi-localized protein                             | Homo sapiens Golgi-localized protein (GOLSYN), transcript variant 1, mRNA [NM_001099744]                                                                                                                                        | 2.70279 | 2.55352 | up | 160.25647   | 61.39557    | 145.88925   | 50.37893    | Detected | Detected    | Detected    | Detected    |
| 2294 | A_23.P16817   | CLK1      | Hs.433732 | CDC-like kinase 1                                   | Homo sapiens CDC-like kinase 1 (CLK1), transcript variant 1, mRNA [NM_004071]                                                                                                                                                   | 2.70261 | 2.75917 | up | 7339.61100  | 2812.05100  | 6925.87260  | 2213.40530  | Detected | Detected    | Detected    | Detected    |
| 2295 | A_23.P382602  | BCL9      | Hs.415209 | B-cell CLL/lymphoma 9                               | Homo sapiens B-cell CLL/lymphoma 9 (BCL9), mRNA [NM_004326]                                                                                                                                                                     | 2.70237 | 1.87085 | up | 21.38202    | 8.19289     | 18.49831    | 8.71885     | Detected | Compromised | Detected    | Compromised |
| 2296 | A_23.P144746  | ZNF454    | Hs.259441 | zinc finger protein 454                             | Homo sapiens zinc finger protein 454 (ZNF454), mRNA [NM_182594]                                                                                                                                                                 | 2.70209 | 4.29596 | up | 35.44881    | 13.58422    | 16.33295    | 3.35251     | Detected | Compromised | Detected    | Compromised |
| 2297 | A_23.P48358   | PCCA      | Hs.80741  | propionyl Coenzyme A carboxylase, alpha polypeptide | Homo sapiens propionyl Coenzyme A carboxylase, alpha polypeptide (PCCA), nuclear gene encoding mitochondrial protein, transcript variant 1, mRNA [NM_000282]                                                                    | 2.70201 | 2.89663 | up | 2382.41240  | 912.98230   | 2472.58740  | 752.70496   | Detected | Detected    | Detected    | Detected    |
| 2298 | A_33.P3311911 |           |           |                                                     |                                                                                                                                                                                                                                 | 2.70198 | 2.43644 | up | 46.32223    | 17.75171    | 39.14465    | 14.16712    | Detected | Compromised | Detected    | Compromised |
| 2299 | A_23.P69908   | GLRX      | Hs.28988  | glutaredoxin (thioltransferase)                     | Homo sapiens glutaredoxin (thioltransferase) (GLRX), transcript variant 1, mRNA [NM_002064]                                                                                                                                     | 2.69775 | 3.01359 | up | 27475.53700 | 10545.77100 | 32001.03100 | 9363.66000  | Detected | Detected    | Detected    | Detected    |
| 2300 | A_33.P3303250 |           | Hs.650691 |                                                     | CDNA FLJ26691 fis. clone MPG07564 [Source:UniProtKB/TrEMBL;Acc:Q6ZP22] [ENST00000451205]                                                                                                                                        | 2.69703 | 9.32079 | up | 74.91072    | 28.76018    | 30.51932    | 2.88727     | Detected | Detected    | Detected    | Compromised |
| 2301 | A_23.P128919  | LGALS3    | Hs.531081 | lectin, galactoside-binding, soluble, 3             | Homo sapiens lectin, galactoside-binding, soluble, 3 (LGALS3), transcript variant 1, mRNA [NM_002306]                                                                                                                           | 2.69632 | 2.64176 | up | 80317.80500 | 30844.14800 | 65801.75000 | 21963.88900 | Detected | Detected    | Detected    | Detected    |
| 2302 | A_23.P171132  | EDA2R     | Hs.302017 | ectodysplasin A2 receptor                           | Homo sapiens ectodysplasin A2 receptor (EDA2R), mRNA [NM_021783]                                                                                                                                                                | 2.69515 | 1.05902 | up | 62.58739    | 24.04568    | 43.38207    | 36.12183    | Detected | Detected    | Detected    | Detected    |
| 2303 | A_23.P78018   | ABCA5     | Hs.421474 | ATP-binding cassette, sub-family A (ABC1), member 5 | Homo sapiens ATP-binding cassette, sub-family A (ABC1), member 5 (ABCA5), transcript variant 1, mRNA [NM_018672]                                                                                                                | 2.69455 | 2.98306 | up | 1227.13800  | 471.56424   | 783.20490   | 231.51515   | Detected | Detected    | Detected    | Detected    |
| 2304 | A_23.P85015   | MAOB      | Hs.654473 | monoamine oxidase B                                 | Homo sapiens monoamine oxidase B (MAOB), nuclear gene encoding mitochondrial protein, mRNA [NM_000896]                                                                                                                          | 2.69411 | 5.03420 | up | 33.09285    | 12.71895    | 21.01397    | 3.68081     | Detected | Compromised | Detected    | Compromised |
| 2305 | A_23.P157361  | WDR60     | Hs.389945 | WD repeat domain 60                                 | Homo sapiens WD repeat domain 60 (WDR60), mRNA [NM_018051]                                                                                                                                                                      | 2.68834 | 2.83074 | up | 1735.24350  | 668.35730   | 1064.59530  | 331.62662   | Detected | Detected    | Detected    | Detected    |
| 2306 | A_23.P401076  | SUSD3     | Hs.88417  | sushi domain containing 3                           | Homo sapiens sushi domain containing 3 (SUSD3), mRNA [NM_145006]                                                                                                                                                                | 2.68798 | 3.92271 | up | 848.85254   | 326.98390   | 680.45526   | 152.96039   | Detected | Detected    | Detected    | Detected    |

|      |               |              |           |                                                           |                                                                                                                                                                                                                                                                               |         |    |         |    |            |            |            |            |             |             |             |             |
|------|---------------|--------------|-----------|-----------------------------------------------------------|-------------------------------------------------------------------------------------------------------------------------------------------------------------------------------------------------------------------------------------------------------------------------------|---------|----|---------|----|------------|------------|------------|------------|-------------|-------------|-------------|-------------|
| 2307 | A_33_P3404052 | TNFAIP8      | Hs.656274 | tumor necrosis factor, alpha-induced protein 8            | Homo sapiens tumor necrosis factor, alpha-induced protein 8 (TNFAIP8), transcript variant 1, mRNA [NM_014350]                                                                                                                                                                 | 2.68789 | up | 2.67531 | up | 151.25940  | 58.26980   | 106.60912  | 35.13874   | Detected    | Detected    | Detected    | Detected    |
| 2308 | A_24_P406986  | SLC43A3      | Hs.99962  | solute carrier family 43, member 3                        | Homo sapiens solute carrier family 43, member 3 (SLC43A3), mRNA [NM_190329]                                                                                                                                                                                                   | 2.68729 | up | 2.39497 | up | 2126.07960 | 819.21520  | 1828.93030 | 673.38446  | Detected    | Detected    | Detected    | Detected    |
| 2309 | A_23_P110196  | HERC5        | Hs.26663  | hect domain and RLD 5                                     | Homo sapiens hect domain and RLD 5 (HERC5), mRNA [NM_015323]                                                                                                                                                                                                                  | 2.68700 | up | 4.27036 | up | 71.27563   | 27.46673   | 40.60429   | 8.38442    | Detected    | Detected    | Detected    | Compromised |
| 2310 | A_24_P210082  | C11orf71     | Hs.715083 | chromosome 11 open reading frame 71                       | Homo sapiens chromosome 11 open reading frame 71 (C11orf71), mRNA [NM_019021]                                                                                                                                                                                                 | 2.68400 | up | 2.77312 | up | 756.02106  | 291.66540  | 988.71140  | 314.38812  | Detected    | Detected    | Detected    | Detected    |
| 2311 | A_33_P3416881 | C2orf27A     | Hs.655680 | chromosome 2 open reading frame 27A                       | Homo sapiens chromosome 2 open reading frame 27A (C2orf27A), mRNA [NM_0113310]                                                                                                                                                                                                | 2.68272 | up | 2.75315 | up | 157.54677  | 60.80887   | 143.16309  | 45.85297   | Detected    | Detected    | Detected    | Detected    |
| 2312 | A_23_P50735   | ZNF181       | Hs.720472 | zinc finger protein 181                                   | Homo sapiens zinc finger protein 181 (ZNF181), transcript variant 1, mRNA [NM_001029997]                                                                                                                                                                                      | 2.68245 | up | 2.44450 | up | 217.11143  | 83.80767   | 133.10341  | 48.01355   | Detected    | Detected    | Detected    | Detected    |
| 2313 | A_23_P76136   | TSPAN11      | Hs.505141 | tetraspanin 11                                            | Homo sapiens tetraspanin 11 (TSPAN11), mRNA [NM_001080509]                                                                                                                                                                                                                    | 2.68132 | up | 2.48611 | up | 527.96594  | 203.88748  | 403.72270  | 143.19540  | Detected    | Detected    | Detected    | Detected    |
| 2314 | A_24_P156501  | EBF1         | Hs.573143 | early B-cell factor 1                                     | Homo sapiens early B-cell factor 1 (EBF1), mRNA [NM_024007]                                                                                                                                                                                                                   | 2.68064 | up | 2.35120 | up | 174.31447  | 67.33304   | 189.24274  | 70.97331   | Detected    | Detected    | Detected    | Detected    |
| 2315 | A_24_P393372  | PACS2        | Hs.525626 | phosphofurin acidic cluster sorting protein 2             | Homo sapiens phosphofurin acidic cluster sorting protein 2 (PACS2), transcript variant 1, mRNA [NM_001100913]                                                                                                                                                                 | 2.67999 | up | 2.32175 | up | 2385.85900 | 921.81860  | 1793.84180 | 681.29285  | Detected    | Detected    | Detected    | Detected    |
| 2316 | A_33_P3356631 | ZNF192       | Hs.57679  | zinc finger protein 192                                   | Homo sapiens zinc finger protein 192 (ZNF192), mRNA [NM_006298]                                                                                                                                                                                                               | 2.67985 | up | 1.25946 | up | 9.95997    | 3.84840    | 18.94888   | 13.26674   | Compromised | Compromised | Detected    | Compromised |
| 2317 | A_33_P3387971 | FLJ42351     | Hs.585221 | hypothetical gene supported by AK124342                   | Homo sapiens cDNA FLJ42351 fis, clone UTERU2005664 [AK124342]                                                                                                                                                                                                                 | 2.67907 | up | 1.50128 | up | 14.79518   | 5.71834    | 5.44075    | 3.19566    | Detected    | Compromised | Compromised | Compromised |
| 2318 | A_24_P187119  |              |           |                                                           | cDNA FLJ25625 fis, clone STM02974 [Source:UniProtKB/TrEMBL;Acc:Q8N1H0] [ENST00000399576]                                                                                                                                                                                      | 2.67877 | up | 2.53466 | up | 121.76460  | 47.06722   | 85.36914   | 29.69933   | Detected    | Detected    | Detected    | Detected    |
| 2319 | A_33_P3410859 | LOC729603    | Hs.674810 | calcium binding protein P22 pseudogene                    | Homo sapiens calcium binding protein P22 pseudogene (LOC729603), non-coding RNA [NR_002288]                                                                                                                                                                                   | 2.67708 | up | 3.15422 | up | 625.84534  | 242.06912  | 327.07083  | 91.43552   | Detected    | Detected    | Detected    | Detected    |
| 2320 | A_33_P3293598 | hCG_2038428  | Hs.434120 | hypothetical protein LOC144776                            | Homo sapiens hypothetical protein LOC144776 (LOC144776), non-coding RNA [NR_027039]                                                                                                                                                                                           | 2.67542 | up | 1.11443 | up | 16.98447   | 6.57344    | 9.06844    | 7.17536    | Detected    | Compromised | Compromised | Compromised |
| 2321 | A_23_P143885  | ARHGEF3      | Hs.476402 | Rho guanine nucleotide exchange factor (GEF) 3            | Homo sapiens Rho guanine nucleotide exchange factor (GEF) 3 (ARHGEF3), transcript variant 3, mRNA [NM_019555]                                                                                                                                                                 | 2.67473 | up | 2.93686 | up | 263.36264  | 101.95470  | 342.90207  | 102.95630  | Detected    | Detected    | Detected    | Detected    |
| 2322 | A_23_P54692   |              |           |                                                           | Putative uncharacterized protein ENSP00000330035 [Source:UniProtKB/TrEMBL;Acc:B7WNQ5] [ENST00000331346]                                                                                                                                                                       | 2.67461 | up | 1.29833 | up | 72.36359   | 28.01513   | 58.64199   | 39.82821   | Detected    | Detected    | Detected    | Detected    |
| 2323 | A_23_P20852   | AUH          | Hs.175905 | AU RNA binding protein/enoyl-Coenzyme A hydratase         | Homo sapiens AU RNA binding protein/enoyl-Coenzyme A hydratase (AUH), nuclear gene encoding mitochondrial protein, mRNA [NM_001698]                                                                                                                                           | 2.67166 | up | 2.59494 | up | 2142.00050 | 830.17700  | 1548.35180 | 526.14795  | Detected    | Detected    | Detected    | Detected    |
| 2324 | A_23_P209232  | CLIP4        | Hs.122927 | CAP-GLY domain containing linker protein family, member 4 | Homo sapiens CAP-GLY domain containing linker protein family, member 4 (CLIP4), mRNA [NM_024692]                                                                                                                                                                              | 2.66964 | up | 2.74715 | up | 4306.31150 | 1670.26480 | 2702.04250 | 867.31323  | Detected    | Detected    | Detected    | Detected    |
| 2325 | A_23_P36724   | FBXL14       | Hs.367956 | F-box and leucine-rich repeat protein 14                  | Homo sapiens F-box and leucine-rich repeat protein 14 (FBXL14), mRNA [NM_152441]                                                                                                                                                                                              | 2.66855 | up | 3.90740 | up | 513.62646  | 199.29932  | 423.21848  | 95.50861   | Detected    | Detected    | Detected    | Detected    |
| 2326 | A_23_P411851  | C14orf49     | Hs.354645 | chromosome 14 open reading frame 49                       | Homo sapiens chromosome 14 open reading frame 49 (C14orf49), mRNA [NM_152592]                                                                                                                                                                                                 | 2.66828 | up | 2.38162 | up | 239.52228  | 92.94951   | 144.47006  | 53.48978   | Detected    | Detected    | Detected    | Detected    |
| 2327 | A_33_P3343972 | RSPH1        | Hs.661069 | radial spoke head 1 homolog (Chlamydomonas)               | Homo sapiens radial spoke head 1 homolog (Chlamydomonas) (RSPH1), mRNA [NM_080660]                                                                                                                                                                                            | 2.66812 | up | 2.17973 | up | 25.61244   | 9.93981    | 16.24456   | 6.57159    | Detected    | Compromised | Detected    | Compromised |
| 2328 | A_33_P3322283 | AZI2         | Hs.706676 | 5-azacytidine induced 2                                   | Homo sapiens 5-azacytidine induced 2 (AZI2), transcript variant 1, mRNA [NM_022461]                                                                                                                                                                                           | 2.66808 | up | 2.76849 | up | 2200.28500 | 853.91205  | 1445.81980 | 460.50760  | Detected    | Detected    | Detected    | Detected    |
| 2329 | A_24_P309594  | SLC48A1      | Hs.438867 | solute carrier family 48 (heme transporter), member 1     | Homo sapiens solute carrier family 48 (heme transporter), member 1 (SLC48A1), mRNA [NM_017842]                                                                                                                                                                                | 2.66547 | up | 2.43634 | up | 5426.91700 | 2108.20650 | 4635.96730 | 1677.90490 | Detected    | Detected    | Detected    | Detected    |
| 2330 | A_23_P29638   | NCKIPSD      | Hs.655006 | NCK interacting protein with SH3 domain                   | Homo sapiens NCK interacting protein with SH3 domain (NCKIPSD), transcript variant 2, mRNA [NM_184231]                                                                                                                                                                        | 2.66431 | up | 2.75669 | up | 415.94824  | 161.65468  | 449.89963  | 143.91057  | Detected    | Detected    | Detected    | Detected    |
| 2331 | A_33_P3422732 | LOC100131180 | Hs.590740 | hypothetical protein LOC100131180                         | PREDICTED: Homo sapiens hypothetical protein LOC100131180 (LOC100131180), mRNA [XM_001722021]                                                                                                                                                                                 | 2.66429 | up | 4.52470 | up | 14.29618   | 5.55613    | 14.21573   | 2.77042    | Detected    | Compromised | Detected    | Compromised |
| 2332 | A_33_P3620087 | LOC400756    | Hs.591444 | hypothetical gene supported by BC030752                   | Homo sapiens hypothetical gene supported by BC030752, mRNA (cDNA clone IMAGE:4796358) [BC030752]                                                                                                                                                                              | 2.66409 | up | 1.46716 | up | 26.46292   | 10.28543   | 30.57357   | 18.37532   | Detected    | Compromised | Detected    | Detected    |
| 2333 | A_33_P3213317 |              |           |                                                           | Eppin Precursor (Epididymal protease inhibitor)(Serine protease inhibitor-like with Kunitz and WAP domains 1)(WAP four-disulfide core domain protein 7)(Protease inhibitor WAP7)(Cancer/testis antigen WAP7)(CT71) [Source:UniProtKB/Swiss-Prot;Acc:O95925] [ENST00000409554] | 2.66308 | up | 2.46918 | up | 59.88384   | 23.28406   | 20.80347   | 7.42930    | Detected    | Detected    | Detected    | Compromised |

|      |               |              |           |                                                                    |                                                                                                                                   |         |    |         |    |             |             |             |             |          |             |          |             |
|------|---------------|--------------|-----------|--------------------------------------------------------------------|-----------------------------------------------------------------------------------------------------------------------------------|---------|----|---------|----|-------------|-------------|-------------|-------------|----------|-------------|----------|-------------|
| 2334 | A_32_P104063  | CRNDE        | Hs.237396 | colorectal neoplasia differentially expressed (non-protein coding) | PREDICTED: Homo sapiens hCG1815491 (LOC643911), miscRNA [XR_042100]                                                               | 2.66282 | up | 2.89576 | up | 24081.86100 | 9364.43400  | 17524.34200 | 5336.36040  | Detected | Detected    | Detected | Detected    |
| 2335 | A_24_P291401  | TMEM150A     | Hs.591559 | transmembrane protein 150A                                         | Homo sapiens transmembrane protein 150A (TMEM150A), transcript variant 1, mRNA [NM_001031738]                                     | 2.66124 | up | 2.52738 | up | 963.68600   | 374.95987   | 821.15890   | 286.49817   | Detected | Detected    | Detected | Detected    |
| 2336 | A_33_P3382331 | HSPA6        | Hs.654614 | heat shock 70kDa protein 6 (HSP70B)                                | Homo sapiens heat shock 70kDa protein 6 (HSP70B) (HSPA6), mRNA [NM_002155]                                                        | 2.66110 | up | 4.26270 | up | 298.34850   | 116.09030   | 181.62470   | 37.57128    | Detected | Detected    | Detected | Detected    |
| 2337 | A_33_P3257170 |              |           |                                                                    | Proline-rich protein 3 (MHC class I region proline-rich protein CAT56) [Source:UniProtKB/Swiss-Prot;Acc:P79522] [ENST00000376555] | 2.66088 | up | 2.23285 | up | 109.33479   | 42.54679    | 90.78534    | 35.85265    | Detected | Detected    | Detected | Detected    |
| 2338 | A_24_P583225  | LOC349114    | Hs.661251 | hypothetical LOC349114                                             | Homo sapiens hypothetical LOC349114 (LOC349114), non-coding RNA [NR_026999]                                                       | 2.66074 | up | 2.16978 | up | 37.91526    | 14.75520    | 28.80119    | 11.70471    | Detected | Compromised | Detected | Compromised |
| 2339 | A_23_P43095   | ZFHX4        | Hs.458973 | zinc finger homeobox 4                                             | Homo sapiens zinc finger homeobox 4 (ZFHX4), mRNA [NM_024721]                                                                     | 2.66068 | up | 2.70822 | up | 396.07925   | 154.14275   | 158.96547   | 51.75873    | Detected | Detected    | Detected | Detected    |
| 2340 | A_33_P3307875 | C14orf147    | Hs.269909 | chromosome 14 open reading frame 147                               | Homo sapiens chromosome 14 open reading frame 147 (C14orf147), mRNA [NM_139293]                                                   | 2.66059 | up | 2.89775 | up | 6130.82030  | 2386.02150  | 4405.52930  | 1340.60900  | Detected | Detected    | Detected | Detected    |
| 2341 | A_23_P421401  | PDGFRB       | Hs.509067 | platelet-derived growth factor receptor, beta polypeptide          | Homo sapiens platelet-derived growth factor receptor, beta polypeptide (PDGFRB), mRNA [NM_002609]                                 | 2.66049 | up | 2.59819 | up | 52989.03000 | 20623.27000 | 35322.79000 | 11988.06800 | Detected | Detected    | Detected | Detected    |
| 2342 | A_23_P131435  | CD302        | Hs.130014 | CD302 molecule                                                     | Homo sapiens CD302 molecule (CD302), mRNA [NM_014880]                                                                             | 2.66032 | up | 2.84082 | up | 862.03470   | 335.52466   | 791.25525   | 245.60596   | Detected | Detected    | Detected | Detected    |
| 2343 | A_24_P119609  | MYO1D        | Hs.658000 | myosin ID                                                          | Homo sapiens myosin ID (MYO1D), mRNA [NM_015194]                                                                                  | 2.65986 | up | 2.73130 | up | 101.33898   | 39.45036    | 95.53548    | 30.84335    | Detected | Detected    | Detected | Detected    |
| 2344 | A_33_P3211793 | LOC728650    | Hs.696467 | hypothetical LOC728650                                             | PREDICTED: Homo sapiens hypothetical LOC728650 (LOC728650), mRNA [XM_002343155]                                                   | 2.65914 | up | 5.24059 | up | 298.24066   | 116.13394   | 278.94510   | 46.93579    | Detected | Detected    | Detected | Detected    |
| 2345 | A_33_P3385062 | HAUS3        | Hs.665869 | HAUS augmin-like complex, subunit 3                                | Homo sapiens HAUS augmin-like complex, subunit 3 (HAUS3), mRNA [NM_024511]                                                        | 2.65804 | up | 5.07206 | up | 12.89964    | 5.02516     | 15.17896    | 2.63890     | Detected | Compromised | Detected | Compromised |
| 2346 | A_23_P26928   |              | Hs.514222 |                                                                    | Ig-like V-type domain-containing protein ENSP0000329493 Precursor [Source:UniProtKB/Swiss-Prot;Acc:A6NFU0] [ENST00000331733]      | 2.65649 | up | 2.43537 | up | 189.27588   | 73.77685    | 191.74980   | 69.42810    | Detected | Detected    | Detected | Detected    |
| 2347 | A_33_P3215277 | TTBK2        | Hs.659846 | tau tubulin kinase 2                                               | Homo sapiens tau tubulin kinase 2 (TTBK2), mRNA [NM_173500]                                                                       | 2.65645 | up | 2.46279 | up | 1342.48820  | 523.28950   | 877.88160   | 314.32162   | Detected | Detected    | Detected | Detected    |
| 2348 | A_33_P3379939 | HLA-F        | Hs.519972 | major histocompatibility complex, class I, F                       | Homo sapiens major histocompatibility complex, class I, F (HLA-F), transcript variant 2, mRNA [NM_018950]                         | 2.65620 | up | 2.66734 | up | 99214.07000 | 38676.38300 | 94341.70000 | 31188.24400 | Detected | Detected    | Detected | Detected    |
| 2349 | A_24_P37264   | RNF144A      | Hs.22146  | ring finger protein 144A                                           | Homo sapiens ring finger protein 144A (RNF144A), mRNA [NM_014746]                                                                 | 2.65539 | up | 2.58464 | up | 234.84244   | 91.57585    | 150.96237   | 51.50310    | Detected | Detected    | Detected | Detected    |
| 2350 | A_32_P174083  | CYCS         | Hs.437060 | cytochrome c, somatic                                              | Homo sapiens cytochrome c, somatic (CYCS), nuclear gene encoding mitochondrial protein, mRNA [NM_018947]                          | 2.65505 | up | 2.56936 | up | 596.46630   | 232.61952   | 557.13140   | 191.20439   | Detected | Detected    | Detected | Detected    |
| 2351 | A_23_P60565   | ZNF354A      | Hs.484324 | zinc finger protein 354A                                           | Homo sapiens zinc finger protein 354A (ZNF354A), mRNA [NM_005649]                                                                 | 2.65486 | up | 3.22345 | up | 1020.48010  | 398.01150   | 750.51636   | 205.30743   | Detected | Detected    | Detected | Detected    |
| 2352 | A_23_P113111  | AR           | Hs.496240 | androgen receptor                                                  | Homo sapiens androgen receptor (AR), transcript variant 1, mRNA [NM_000044]                                                       | 2.65470 | up | 2.79181 | up | 2104.53610  | 820.86910   | 983.63250   | 310.67914   | Detected | Detected    | Detected | Detected    |
| 2353 | A_33_P3343101 |              |           |                                                                    | Arginine and glutamate-rich protein 1 [Source:UniProtKB/Swiss-Prot;Acc:Q9UW66] [ENST00000426600]                                  | 2.65438 | up | 2.97194 | up | 40.75202    | 15.89717    | 33.49465    | 9.93805     | Detected | Compromised | Detected | Compromised |
| 2354 | A_23_P376591  | CLYBL        | Hs.655642 | citrate lyase beta like                                            | Homo sapiens citrate lyase beta like (CLYBL), mRNA [NM_206808]                                                                    | 2.65272 | up | 2.23222 | up | 186.09581   | 72.64040    | 176.75195   | 69.82205    | Detected | Detected    | Detected | Detected    |
| 2355 | A_23_P107166  | ACBD4        | Hs.110298 | acyl-Coenzyme A binding domain containing 4                        | Homo sapiens acyl-Coenzyme A binding domain containing 4 (ACBD4), transcript variant 2, mRNA [NM_024722]                          | 2.65204 | up | 2.71467 | up | 180.69081   | 70.54864    | 144.54988   | 46.95334    | Detected | Detected    | Detected | Detected    |
| 2356 | A_24_P91094   | RUNDC3A      | Hs.500197 | RUN domain containing 3A                                           | Homo sapiens RUN domain containing 3A (RUNDC3A), transcript variant 2, mRNA [NM_006695]                                           | 2.65100 | up | 2.95669 | up | 75.60793    | 29.53190    | 72.62940    | 21.66069    | Detected | Detected    | Detected | Detected    |
| 2357 | A_33_P3360675 | PRKAR1B      | Hs.520851 | protein kinase, cAMP-dependent, regulatory, type I, beta           | Homo sapiens protein kinase, cAMP-dependent, regulatory, type I, beta (PRKAR1B), transcript variant 1, mRNA [NM_001164761]        | 2.65053 | up | 2.57986 | up | 1440.59850  | 562.78510   | 1115.41690  | 381.24750   | Detected | Detected    | Detected | Detected    |
| 2358 | A_23_P44195   | MSI2         | Hs.658922 | musashi homolog 2 (Drosophila)                                     | Homo sapiens musashi homolog 2 (Drosophila) (MSI2), transcript variant 1, mRNA [NM_138962]                                        | 2.65032 | up | 2.46608 | up | 958.55440   | 374.49940   | 852.47440   | 304.81740   | Detected | Detected    | Detected | Detected    |
| 2359 | A_24_P161018  | PARP14       | Hs.518203 | poly (ADP-ribose) polymerase family, member 14                     | Homo sapiens poly (ADP-ribose) polymerase family, member 14 (PARP14), mRNA [NM_017554]                                            | 2.64995 | up | 3.41538 | up | 449.63977   | 175.69504   | 296.76430   | 76.61930    | Detected | Detected    | Detected | Detected    |
| 2360 | A_23_P257417  | C2orf63      | Hs.347014 | chromosome 2 open reading frame 63                                 | Homo sapiens chromosome 2 open reading frame 63 (C2orf63), transcript variant 1, mRNA [NM_152385]                                 | 2.64968 | up | 3.04330 | up | 122.79360   | 47.98616    | 80.46890    | 23.31573    | Detected | Detected    | Detected | Detected    |
| 2361 | A_33_P3391339 | LOC100287820 | Hs.648247 | hypothetical protein LOC100287820                                  | Hypothetical gene supported by BC066547 [Source:UniProtKB/TrEMBL;Acc:Q6NYL1] [ENST00000383040]                                    | 2.64946 | up | 2.66484 | up | 96.22102    | 37.60498    | 68.31778    | 22.60620    | Detected | Detected    | Detected | Detected    |
| 2362 | A_32_P50417   | LOC100130107 | Hs.710718 | hypothetical LOC100130107                                          | PREDICTED: Homo sapiens hypothetical LOC100130107 (LOC100130107), mRNA [XM_001716672]                                             | 2.64843 | up | 2.41043 | up | 2097.10100  | 819.90430   | 1340.98130  | 490.56195   | Detected | Detected    | Detected | Detected    |
| 2363 | A_23_P412214  | RAP1GAP2     | Hs.499659 | RAP1 GTPase activating protein 2                                   | Homo sapiens RAP1 GTPase activating protein 2 (RAP1GAP2), transcript variant 1, mRNA [NM_015085]                                  | 2.64782 | up | 2.88580 | up | 37.15947    | 14.53162    | 35.00401    | 10.69590    | Detected | Compromised | Detected | Compromised |

|      |               |           |           |                                                             |                                                                                                                                                                  |         |    |         |    |             |             |             |             |             |             |             |             |
|------|---------------|-----------|-----------|-------------------------------------------------------------|------------------------------------------------------------------------------------------------------------------------------------------------------------------|---------|----|---------|----|-------------|-------------|-------------|-------------|-------------|-------------|-------------|-------------|
| 2364 | A_23_P137856  | MUC1      | Hs.89603  | mucin 1, cell surface associated                            | Homo sapiens mucin 1, cell surface associated (MUC1), transcript variant 1, mRNA [NM_002456]                                                                     | 2.64641 | up | 2.26597 | up | 579.46295   | 226.72626   | 525.39060   | 204.45319   | Detected    | Detected    | Detected    | Detected    |
| 2365 | A_33_P3391796 | NOG       | Hs.248201 | noggin                                                      | Homo sapiens noggin (NOG), mRNA [NM_005450]                                                                                                                      | 2.64519 | up | 2.84193 | up | 306.61194   | 120.02342   | 232.86661   | 72.25366    | Detected    | Detected    | Detected    | Detected    |
| 2366 | A_24_P333857  | SGIP1     | Hs.132121 | SH3-domain GRB2-like (endophilin) interacting protein 1     | Homo sapiens SH3-domain GRB2-like (endophilin) interacting protein 1 (SGIP1), mRNA [NM_032219]                                                                   | 2.64444 | up | 2.68928 | up | 750.78827   | 293.97910   | 637.67060   | 209.08632   | Detected    | Detected    | Detected    | Detected    |
| 2367 | A_24_P706752  | PLA2G12A  | Hs.389452 | phospholipase A2, group XIII                                | Homo sapiens phospholipase A2, group XIII (PLA2G12A), mRNA [NM_030821]                                                                                           | 2.64407 | up | 2.97161 | up | 1245.26260  | 487.66403   | 950.95000   | 282.18290   | Detected    | Detected    | Detected    | Detected    |
| 2368 | A_32_P103837  | FAM60A    | Hs.505154 | family with sequence similarity 60, member A                | Homo sapiens family with sequence similarity 60, member A (FAM60A), transcript variant 2, mRNA [NM_021238]                                                       | 2.64362 | up | 2.75208 | up | 1279.82400  | 501.28400   | 590.34430   | 189.15163   | Detected    | Detected    | Detected    | Detected    |
| 2369 | A_23_P216630  | SLC44A1   | Hs.573495 | solute carrier family 44, member 1                          | Homo sapiens solute carrier family 44, member 1 (SLC44A1), mRNA [NM_080546]                                                                                      | 2.64066 | up | 2.54315 | up | 60259.83600 | 23629.21500 | 53149.87500 | 18428.78000 | Detected    | Detected    | Detected    | Detected    |
| 2370 | A_23_P121885  | ROPN1L    | Hs.381089 | roporin 1-like                                              | Homo sapiens roporin 1-like (ROPN1L), mRNA [NM_031916]                                                                                                           | 2.63914 | up | 2.99138 | up | 189.76573   | 74.45407    | 171.42032   | 50.53081    | Detected    | Detected    | Detected    | Detected    |
| 2371 | A_24_P385134  | SCD5      | Hs.379191 | stearoyl-CoA desaturase 5                                   | Homo sapiens stearoyl-CoA desaturase 5 (SCD5), transcript variant 1, mRNA [NM_001037582]                                                                         | 2.63807 | up | 2.71372 | up | 1867.68310  | 733.07720   | 1442.78090  | 468.81354   | Detected    | Detected    | Detected    | Detected    |
| 2372 | A_23_P422115  | C9orf116  | Hs.414028 | chromosome 9 open reading frame 116                         | Homo sapiens chromosome 9 open reading frame 116 (C9orf116), transcript variant 1, mRNA [NM_001048265]                                                           | 2.63803 | up | 2.54321 | up | 2225.96240  | 873.71790   | 2368.95240  | 821.37006   | Detected    | Detected    | Detected    | Detected    |
| 2373 | A_33_P3419567 | RAD21L1   | Hs.713451 | RAD21-like 1 (S. pombe)                                     | Homo sapiens RAD21-like 1 (S. pombe) (RAD21L1), mRNA [NM_001136566]                                                                                              | 2.63791 | up | 1.68102 | up | 26.99780    | 10.59745    | 17.60497    | 9.23480     | Detected    | Compromised | Detected    | Compromised |
| 2374 | A_33_P3247392 | TPTE      | Hs.122886 | transmembrane phosphatase with tensin homology              | Homo sapiens transmembrane phosphatase with tensin homology (TPTE), transcript variant 1, mRNA [NM_199351]                                                       | 2.63600 | up | 3.37901 | up | 139.30809   | 54.72226    | 117.99721   | 30.79266    | Detected    | Detected    | Detected    | Detected    |
| 2375 | A_23_P79155   | GPR39     | Hs.432395 | G protein-coupled receptor 39                               | Homo sapiens G protein-coupled receptor 39 (GPR39), mRNA [NM_001508]                                                                                             | 2.63589 | up | 2.80973 | up | 173.73503   | 68.24860    | 202.24092   | 63.47029    | Detected    | Detected    | Detected    | Detected    |
| 2376 | A_23_P84872   | SECISBP2  | Hs.59804  | SECIS binding protein 2                                     | Homo sapiens SECIS binding protein 2 (SECISBP2), mRNA [NM_024077]                                                                                                | 2.63444 | up | 2.65358 | up | 488.49902   | 192.00310   | 328.32812   | 109.10412   | Detected    | Detected    | Detected    | Detected    |
| 2377 | A_24_P807031  | ATP6AP1L  | Hs.364045 | ATPase, H+ transporting, lysosomal accessory protein 1-like | Homo sapiens ATPase, H+ transporting, lysosomal accessory protein 1-like (ATP6AP1L), mRNA [NM_001017971]                                                         | 2.63325 | up | 2.58081 | up | 257.54730   | 101.27409   | 196.24289   | 67.05071    | Detected    | Detected    | Detected    | Detected    |
| 2378 | A_23_P211244  | PRMT2     | Hs.154163 | protein arginine methyltransferase 2                        | Homo sapiens protein arginine methyltransferase 2 (PRMT2), transcript variant 1, mRNA [NM_206962]                                                                | 2.63305 | up | 2.46885 | up | 1390.70790  | 546.90234   | 1171.91060  | 418.56772   | Detected    | Detected    | Detected    | Detected    |
| 2379 | A_23_P128728  | ARG2      | Hs.226007 | arginase, type II                                           | Homo sapiens arginase, type II (ARG2), nuclear gene encoding mitochondrial protein, mRNA [NM_0011172]                                                            | 2.63165 | up | 2.12293 | up | 405.57745   | 159.58018   | 414.65384   | 172.23233   | Detected    | Detected    | Detected    | Detected    |
| 2380 | A_23_P57036   | CD40      | Hs.472860 | CD40 molecule, TNF receptor superfamily member 5            | Homo sapiens CD40 molecule, TNF receptor superfamily member 5 (CD40), transcript variant 1, mRNA [NM_001250]                                                     | 2.63164 | up | 2.14054 | up | 399.17374   | 157.06107   | 486.50168   | 200.41289   | Detected    | Detected    | Detected    | Detected    |
| 2381 | A_33_P3311083 |           |           |                                                             | Pleckstrin homology-like domain family B member 3 [Source:UniProtKB/Swiss-Prot;Acc:Q6NSJ2] [ENST00000314735]                                                     | 2.63160 | up | 1.76198 | up | 8.04312     | 3.16474     | 16.88327    | 8.44929     | Compromised | Compromised | Detected    | Compromised |
| 2382 | A_33_P3295550 | TET1      | Hs.567594 | tet oncogene 1                                              | Homo sapiens tet oncogene 1 (TET1), mRNA [NM_030625]                                                                                                             | 2.63074 | up | 2.58637 | up | 386.89430   | 152.28192   | 346.90192   | 118.27197   | Detected    | Detected    | Detected    | Detected    |
| 2383 | A_33_P3324505 |           |           |                                                             |                                                                                                                                                                  | 2.63019 | up | 1.80521 | up | 41.20751    | 16.22265    | 24.68537    | 12.05809    | Detected    | Compromised | Detected    | Compromised |
| 2384 | A_33_P3236102 | IER5L     | Hs.529857 | immediate early response 5-like                             | Homo sapiens immediate early response 5-like (IER5L), mRNA [NM_203634]                                                                                           | 2.62963 | up | 2.58589 | up | 2244.03100  | 883.62274   | 1469.55140  | 501.11768   | Detected    | Detected    | Detected    | Detected    |
| 2385 | A_33_P3287907 | LOC728723 | Hs.161338 | hypothetical LOC728723                                      | Homo sapiens hypothetical LOC728723 (LOC728723), non-coding RNA [NR_024398]                                                                                      | 2.62951 | up | 2.16734 | up | 31.82555    | 12.53240    | 8.27923     | 3.36843     | Detected    | Compromised | Compromised | Compromised |
| 2386 | A_33_P3367201 | MMAB      | Hs.12106  | methylmalonic aciduria (cobalamin deficiency) cblB type     | Homo sapiens methylmalonic aciduria (cobalamin deficiency) cblB type (MMAB), nuclear gene encoding mitochondrial protein, mRNA [NM_052845]                       | 2.62933 | up | 2.60006 | up | 339.17648   | 133.57138   | 299.76157   | 101.66191   | Detected    | Detected    | Detected    | Detected    |
| 2387 | A_33_P3209816 | DPY19L3   | Hs.194392 | dpy-19-like 3 (C. elegans)                                  | Homo sapiens dpy-19-like 3 (C. elegans) (DPY19L3), mRNA [NM_207325]                                                                                              | 2.62661 | up | 3.24530 | up | 18.67290    | 7.36121     | 30.22174    | 8.21165     | Detected    | Compromised | Detected    | Compromised |
| 2388 | A_33_P3783235 | LOC286052 | Hs.100691 | hypothetical protein LOC286052                              | Homo sapiens cDNA FLJ37785, clone BRHIP2028330 [AK095104]                                                                                                        | 2.62552 | up | 2.51462 | up | 988.82190   | 389.97397   | 721.54160   | 253.01965   | Detected    | Detected    | Detected    | Detected    |
| 2389 | A_24_P303594  | ACTR3B    | Hs.647117 | ARP3 actin-related protein 3 homolog B (yeast)              | Homo sapiens ARP3 actin-related protein 3 homolog B (yeast) (ACTR3B), transcript variant 2, mRNA [NM_001040135]                                                  | 2.62447 | up | 2.26151 | up | 194.17921   | 76.61145    | 184.54645   | 71.95707    | Detected    | Detected    | Detected    | Detected    |
| 2390 | A_33_P3274129 | TMEM151B  | Hs.632851 | transmembrane protein 151B                                  | Homo sapiens transmembrane protein 151B (TMEM151B), mRNA [NM_001137560]                                                                                          | 2.62332 | up | 3.32385 | up | 19.79187    | 7.81210     | 15.11412    | 4.00966     | Detected    | Compromised | Detected    | Compromised |
| 2391 | A_23_P391228  | MANEAL    | Hs.534562 | mannosidase, endo-alpha-like                                | Homo sapiens mannosidase, endo-alpha-like (MANEAL), transcript variant 1, mRNA [NM_001031740]                                                                    | 2.62227 | up | 2.68414 | up | 67.91811    | 26.81895    | 52.51436    | 17.25199    | Detected    | Detected    | Detected    | Detected    |
| 2392 | A_33_P3354569 | GPD2      | Hs.512382 | glycerol-3-phosphate dehydrogenase 2 (mitochondrial)        | Homo sapiens glycerol-3-phosphate dehydrogenase 2 (mitochondrial) (GPD2), nuclear gene encoding mitochondrial protein, transcript variant 1, mRNA [NM_001083112] | 2.61972 | up | 2.58521 | up | 4125.64100  | 1630.68430  | 2954.59500  | 1007.78326  | Detected    | Detected    | Detected    | Detected    |



|      |               |           |           |                                                                                   |                                                                                                                                                 |         |    |         |    |             |            |             |            |             |             |          |             |
|------|---------------|-----------|-----------|-----------------------------------------------------------------------------------|-------------------------------------------------------------------------------------------------------------------------------------------------|---------|----|---------|----|-------------|------------|-------------|------------|-------------|-------------|----------|-------------|
| 2393 | A_23_P12884   | GRK5      | Hs.524625 | G protein-coupled receptor kinase 5                                               | Homo sapiens G protein-coupled receptor kinase 5 (GRK5), mRNA [NM_005308]                                                                       | 2.61968 | up | 2.61426 | up | 4844.80130  | 1914.96700 | 4158.13770  | 1402.54250 | Detected    | Detected    | Detected | Detected    |
| 2394 | A_24_P379165  | FOXO4     | Hs.584654 | forkhead box O4                                                                   | Homo sapiens forkhead box O4 (FOXO4), mRNA [NM_005938]                                                                                          | 2.61946 | up | 2.19949 | up | 207.34349   | 81.96180   | 156.73949   | 62.83793   | Detected    | Detected    | Detected | Detected    |
| 2395 | A_33_P3370310 |           |           |                                                                                   | UPF0599 protein C8orf83 [Source:UniProtKB/Swiss-Prot;Acc:Q629K1] [ENST00000378861]                                                              | 2.61876 | up | 1.81346 | up | 73.54961    | 29.08158   | 72.92074    | 35.45758   | Detected    | Detected    | Detected | Detected    |
| 2396 | A_23_P211850  | ABHD6     | Hs.476454 | abhydrolase domain containing 6                                                   | Homo sapiens abhydrolase domain containing 6 (ABHD6), mRNA [NM_020676]                                                                          | 2.61805 | up | 2.80193 | up | 2148.36450  | 849.69520  | 1780.49700  | 560.33810  | Detected    | Detected    | Detected | Detected    |
| 2397 | A_23_P86021   | SELENBP1  | Hs.632460 | selenium binding protein 1                                                        | Homo sapiens selenium binding protein 1 (SELENBP1), mRNA [NM_003944]                                                                            | 2.61760 | up | 2.49365 | up | 4541.43460  | 1796.47970 | 3642.94560  | 1288.19710 | Detected    | Detected    | Detected | Detected    |
| 2398 | A_24_P135255  |           | Hs.442781 |                                                                                   | SGT1, suppressor of G2 allele of SKP1 like 1 (S. cerevisiae) HCG2920254, isoform CRA f. [Source:UniProtKB/TrEMBL;Acc:Q5T9E9] [ENST00000304932]  | 2.61701 | up | 2.92399 | up | 38.62441    | 15.28231   | 21.92378    | 6.61157    | Detected    | Detected    | Detected | Compromised |
| 2399 | A_23_P368794  | TCERG1L   | Hs.126575 | transcription elongation regulator 1-like                                         | Homo sapiens transcription elongation regulator 1-like (TCERG1L), mRNA [NM_174937]                                                              | 2.61616 | up | 2.43389 | up | 8.76389     | 3.46870    | 16.24385    | 5.88510    | Compromised | Compromised | Detected | Compromised |
| 2400 | A_23_P359655  | ZNF664    | Hs.524828 | zinc finger protein 664                                                           | Homo sapiens zinc finger protein 664 (ZNF664), mRNA [NM_152437]                                                                                 | 2.61608 | up | 2.56815 | up | 12359.41400 | 4891.92140 | 10681.62800 | 3667.60350 | Detected    | Detected    | Detected | Detected    |
| 2401 | A_32_P190461  | LOC728534 | Hs.679932 | hypothetical LOC728534                                                            | PREDICTED: Homo sapiens hypothetical LOC728534, transcript variant 2 (LOC728534), mRNA [XM_001724486]                                           | 2.61605 | up | 2.10182 | up | 46.11272    | 18.25191   | 36.33460    | 15.24367   | Detected    | Detected    | Detected | Detected    |
| 2402 | A_33_P3773374 | LOC286063 | Hs.21550  | hypothetical protein LOC286063                                                    | Homo sapiens cDNA FLJ33573 fis, clone BRAM12010798 [AK090892]                                                                                   | 2.61589 | up | 3.41384 | up | 118.21983   | 46.79547   | 43.67109    | 11.28020   | Detected    | Detected    | Detected | Compromised |
| 2403 | A_33_P3379922 | PROC      | Hs.224698 | protein C (inactivator of coagulation factors Va and VIIIa)                       | Homo sapiens protein C (inactivator of coagulation factors Va and VIIIa) (PROC), mRNA [NM_000312]                                               | 2.61319 | up | 4.35004 | up | 85.31436    | 33.80525   | 93.82890    | 19.01994   | Detected    | Detected    | Detected | Detected    |
| 2404 | A_32_P103669  | GOLGA8E   | Hs.454647 | golgi autoantigen, golgin subfamily a, 8E                                         | Homo sapiens golgi autoantigen, golgin subfamily a, 8E (GOLGA8E), mRNA [NM_001012423]                                                           | 2.61263 | up | 3.06313 | up | 1608.15280  | 637.35660  | 144.90952   | 41.71546   | Detected    | Detected    | Detected | Detected    |
| 2405 | A_33_P3236993 | ARVCF     | Hs.713616 | armadillo repeat gene deletes in velocardiofacial syndrome                        | Homo sapiens armadillo repeat gene deletes in velocardiofacial syndrome (ARVCF), mRNA [NM_001670]                                               | 2.61209 | up | 1.77297 | up | 59.78721    | 23.70028   | 47.86024    | 23.80345   | Detected    | Detected    | Detected | Detected    |
| 2406 | A_23_P41664   | LRRRC70   | Hs.721348 | leucine rich repeat containing 70                                                 | Homo sapiens leucine rich repeat containing 70 (LRRRC70), mRNA [NM_181506]                                                                      | 2.61067 | up | 2.68330 | up | 134.31561   | 53.27308   | 93.84658    | 30.84002   | Detected    | Detected    | Detected | Detected    |
| 2407 | A_33_P3315719 | PLEKHH2   | Hs.164162 | pleckstrin homology domain containing, family H (with MYTH4 domain) member 2      | Homo sapiens pleckstrin homology domain containing, family H (with MYTH4 domain) member 2 (PLEKHH2), mRNA [NM_172069]                           | 2.60970 | up | 2.58848 | up | 157.36633   | 62.43885   | 112.62922   | 38.36826   | Detected    | Detected    | Detected | Detected    |
| 2408 | A_33_P3380867 | STAT5B    | Hs.595276 | signal transducer and activator of transcription 5B                               | Homo sapiens signal transducer and activator of transcription 5B (STAT5B), mRNA [NM_012448]                                                     | 2.60928 | up | 2.67820 | up | 3150.59470  | 1250.27420 | 1811.62500  | 596.47260  | Detected    | Detected    | Detected | Detected    |
| 2409 | A_33_P3225313 | FAM91A1   | Hs.459174 | family with sequence similarity 91, member A1                                     | Homo sapiens family with sequence similarity 91, member A1 (FAM91A1), mRNA [NM_144963]                                                          | 2.60913 | up | 1.74974 | up | 13.83474    | 5.49046    | 23.32592    | 11.75525   | Detected    | Compromised | Detected | Compromised |
| 2410 | A_33_P3250083 | NFATC4    | Hs.77810  | nuclear factor of activated T-cells, cytoplasmic, calcineurin-dependent 4         | Homo sapiens nuclear factor of activated T-cells, cytoplasmic, calcineurin-dependent 4 (NFATC4), transcript variant 1, mRNA [NM_001136022]      | 2.60912 | up | 2.51473 | up | 8602.42100  | 3413.97100 | 7543.43650  | 2645.10300 | Detected    | Detected    | Detected | Detected    |
| 2411 | A_24_P179183  | ANKRD12   | Hs.464585 | ankyrin repeat domain 12                                                          | Homo sapiens ankyrin repeat domain 12 (ANKRD12), transcript variant 1, mRNA [NM_015208]                                                         | 2.60856 | up | 3.06558 | up | 3054.66280  | 1212.53820 | 1294.06570  | 372.22754  | Detected    | Detected    | Detected | Detected    |
| 2412 | A_33_P3306146 | PLAU      | Hs.77274  | plasminogen activator, urokinase                                                  | Homo sapiens plasminogen activator, urokinase (PLAU), transcript variant 2, mRNA [NM_001145031]                                                 | 2.60846 | up | 2.37238 | up | 380.63810   | 151.09871  | 501.72690   | 186.48705  | Detected    | Detected    | Detected | Detected    |
| 2413 | A_32_P196021  | FGF7      | Hs.567268 | fibroblast growth factor 7 (keratinocyte growth factor)                           | Homo sapiens fibroblast growth factor 7 (keratinocyte growth factor) (FGF7), mRNA [NM_002009]                                                   | 2.60829 | up | 3.56643 | up | 269.14322   | 106.84673  | 202.96716   | 50.18317   | Detected    | Detected    | Detected | Detected    |
| 2414 | A_23_P73526   | CITED1    | Hs.40403  | Cbp/p300-interacting transactivator, with Glu/Asp-rich carboxy-terminal domain, 1 | Homo sapiens Cbp/p300-interacting transactivator, with Glu/Asp-rich carboxy-terminal domain, 1 (CITED1), transcript variant 1, mRNA [NM_004143] | 2.60734 | up | 2.66254 | up | 52.00576    | 20.65315   | 57.90118    | 19.17595   | Detected    | Detected    | Detected | Detected    |
| 2415 | A_33_P3276585 | IFT74     | Hs.145402 | intraflagellar transport 74 homolog (Chlamydomonas)                               | Homo sapiens intraflagellar transport 74 homolog (Chlamydomonas) (IFT74), transcript variant 4, mRNA [NM_001099224]                             | 2.60719 | up | 1.96051 | up | 23.14281    | 9.19128    | 19.04984    | 8.56818    | Detected    | Compromised | Detected | Compromised |
| 2416 | A_33_P3244283 | CAMK2N2   | Hs.585003 | calcium/calmodulin-dependent protein kinase II inhibitor 2                        | Homo sapiens calcium/calmodulin-dependent protein kinase II inhibitor 2 (CAMK2N2), mRNA [NM_033259]                                             | 2.60654 | up | 2.46525 | up | 1419.73600  | 563.99540  | 1537.76920  | 550.04140  | Detected    | Detected    | Detected | Detected    |
| 2417 | A_23_P380928  | TTL3      | Hs.709359 | tubulin tyrosine ligase-like family, member 3                                     | Homo sapiens tubulin tyrosine ligase-like family, member 3 (TTL3), mRNA [NM_001025930]                                                          | 2.60617 | up | 3.32630 | up | 2198.25100  | 873.38934  | 1746.65620  | 463.03198  | Detected    | Detected    | Detected | Detected    |
| 2418 | A_23_P87082   | ROBO3     | Hs.435621 | roundabout, axon guidance receptor, homolog 3 (Drosophila)                        | Homo sapiens roundabout, axon guidance receptor, homolog 3 (Drosophila) (ROBO3), mRNA [NM_022370]                                               | 2.60565 | up | 4.21614 | up | 462.81168   | 183.91700  | 503.43152   | 105.29097  | Detected    | Detected    | Detected | Detected    |
| 2419 | A_24_P146683  | MSMB      | Hs.255462 | microseminoprotein, beta-                                                         | Homo sapiens microseminoprotein, beta- (MSMB), transcript variant PSP94, mRNA [NM_002443]                                                       | 2.60556 | up | 3.10660 | up | 24.91783    | 9.90244    | 18.36275    | 5.21215    | Detected    | Compromised | Detected | Compromised |
| 2420 | A_24_P336759  | MCL1      | Hs.632486 | myeloid cell leukemia sequence 1 (BCL2-related)                                   | Homo sapiens myeloid cell leukemia sequence 1 (BCL2-related) (MCL1), transcript variant 1, mRNA [NM_021960]                                     | 2.60441 | up | 2.53843 | up | 14453.68750 | 5746.49000 | 9370.38400  | 3255.05370 | Detected    | Detected    | Detected | Detected    |

|      |               |           |           |                                                          |                                                                                                                                                              |         |    |         |    |             |            |             |            |          |             |             |             |
|------|---------------|-----------|-----------|----------------------------------------------------------|--------------------------------------------------------------------------------------------------------------------------------------------------------------|---------|----|---------|----|-------------|------------|-------------|------------|----------|-------------|-------------|-------------|
| 2421 | A_32_P49199   | PGR       | Hs.32405  | progesterone receptor                                    | Homo sapiens progesterone receptor (PGR), mRNA [NM_000926]                                                                                                   | 2.60267 | up | 5.11502 | up | 122.83887   | 48.87093   | 63.82708    | 11.00331   | Detected | Detected    | Detected    | Compromised |
| 2422 | A_33_P3286066 | PHLDB2    | Hs.477114 | pleckstrin homology-like domain, family B, member 2      | Homo sapiens pleckstrin homology-like domain, family B, member 2 (PHLDB2), transcript variant 1, mRNA [NM_001134438]                                         | 2.60237 | up | 4.13551 | up | 222.14711   | 88.39044   | 63.80446    | 13.60464   | Detected | Detected    | Detected    | Detected    |
| 2423 | A_33_P3284364 | DNM3      | Hs.654775 | dynamins 3                                               | Homo sapiens dynamin 3 (DNM3), transcript variant 2, mRNA [NM_001136127]                                                                                     | 2.60203 | up | 2.77493 | up | 373.09490   | 148.47072  | 362.93365   | 115.32948  | Detected | Detected    | Detected    | Detected    |
| 2424 | A_33_P3309468 | PTPRS     | Hs.644384 | protein tyrosine phosphatase, receptor type, S           | Homo sapiens protein tyrosine phosphatase, receptor type, S (PTPRS), transcript variant 1, mRNA [NM_002850]                                                  | 2.60130 | up | 2.58480 | up | 24148.41600 | 9612.37100 | 17735.39300 | 6050.34380 | Detected | Detected    | Detected    | Detected    |
| 2425 | A_23_P137470  | SIPA1L2   | Hs.675721 | signal-induced proliferation-associated 1 like 2         | Homo sapiens signal-induced proliferation-associated 1 like 2 (SIPA1L2), mRNA [NM_020808]                                                                    | 2.60130 | up | 2.99520 | up | 260.11478   | 103.53970  | 207.45009   | 61.07366   | Detected | Detected    | Detected    | Detected    |
| 2426 | A_23_P342709  | FBXO15    | Hs.664011 | F-box protein 15                                         | Homo sapiens F-box protein 15 (FBXO15), transcript variant 1, mRNA [NM_152676]                                                                               | 2.60037 | up | 2.41878 | up | 79.46852    | 31.64416   | 75.16104    | 27.40072   | Detected | Detected    | Detected    | Detected    |
| 2427 | A_23_P210445  | L3MBTL    | Hs.709356 | l(3)mbt-like (Drosophila)                                | Homo sapiens l(3)mbt-like (Drosophila) (L3MBTL), transcript variant II, mRNA [NM_032107]                                                                     | 2.60010 | up | 2.13668 | up | 28.56923    | 11.37737   | 12.45746    | 5.13629    | Detected | Compromised | Compromised | Compromised |
| 2428 | A_24_P82155   | ANKDD1A   | Hs.207157 | ankyrin repeat and death domain containing 1A            | Homo sapiens ankyrin repeat and death domain containing 1A (ANKDD1A), mRNA [NM_182703]                                                                       | 2.59980 | up | 1.97129 | up | 89.05508    | 35.46917   | 52.62431    | 23.53967   | Detected | Detected    | Detected    | Detected    |
| 2429 | A_33_P3244112 | UOX       | Hs.647646 | urate oxidase (pseudogene)                               | Homo sapiens urate oxidase (pseudogene) (UOX), non-coding RNA [NR_003927]                                                                                    | 2.59932 | up | 4.23356 | up | 20.60939    | 8.20991    | 18.55851    | 3.86548    | Detected | Compromised | Detected    | Compromised |
| 2430 | A_24_P309317  | PSAP      | Hs.523004 | prosaposin                                               | Homo sapiens prosaposin (PSAP), transcript variant 2, mRNA [NM_001942465]                                                                                    | 2.59798 | up | 2.21073 | up | 8785.77600  | 3501.68650 | 9851.92300  | 3929.62520 | Detected | Detected    | Detected    | Detected    |
| 2431 | A_23_P142872  | TCF7L1    | Hs.516297 | transcription factor 7-like 1 (T-cell specific, HMG-box) | Homo sapiens transcription factor 7-like 1 (T-cell specific, HMG-box) (TCF7L1), mRNA [NM_031283]                                                             | 2.59778 | up | 2.53273 | up | 416.58606   | 166.04880  | 215.01364   | 74.85880   | Detected | Detected    | Detected    | Detected    |
| 2432 | A_23_P372255  | ITPKB     | Hs.528087 | inositol 1,4,5-trisphosphate 3-kinase B                  | Homo sapiens inositol 1,4,5-trisphosphate 3-kinase B (ITPKB), mRNA [NM_002221]                                                                               | 2.59773 | up | 2.75632 | up | 318.83636   | 127.08860  | 277.03710   | 88.62856   | Detected | Detected    | Detected    | Detected    |
| 2433 | A_24_P402690  | ITM2C     | Hs.111577 | integral membrane protein 2C                             | Homo sapiens integral membrane protein 2C (ITM2C), transcript variant 1, mRNA [NM_030926]                                                                    | 2.59663 | up | 2.44587 | up | 23207.69300 | 9254.54400 | 12848.14100 | 4632.04640 | Detected | Detected    | Detected    | Detected    |
| 2434 | A_33_P3393650 | PLEKHA5   | Hs.188614 | pleckstrin homology domain containing, family A member 5 | Homo sapiens pleckstrin homology domain containing, family A member 5 (PLEKHA5), transcript variant 1, mRNA [NM_019012]                                      | 2.59614 | up | 1.85508 | up | 55.39465    | 22.09393   | 48.64742    | 23.12396   | Detected | Detected    | Detected    | Detected    |
| 2435 | A_33_P3217307 |           | Hs.655921 |                                                          | Protein arcease (Protein ZBTB50S/Zinc finger and BTB domain-containing opposite strand protein 8) [Source:UniProtKB/Swiss-Prot;Acc:Q8IWT0] [ENST00000341885] | 2.59598 | up | 2.85906 | up | 21.43999    | 8.55176    | 19.22527    | 5.92945    | Detected | Compromised | Detected    | Compromised |
| 2436 | A_32_P22501   | LOC645212 | Hs.698054 | hypothetical LOC645212                                   | LOC645212 protein fragment [Source:UniProtKB/TrEMBL;Acc:Q8TA S2] [ENST00000313807]                                                                           | 2.59479 | up | 2.37798 | up | 660.20874   | 263.45877  | 714.31200   | 264.87723  | Detected | Detected    | Detected    | Detected    |
| 2437 | A_33_P3266828 | TMEM8B    | Hs.493808 | transmembrane protein 8B                                 | Homo sapiens transmembrane protein 8B (TMEM8B), transcript variant 3, mRNA [NM_016446]                                                                       | 2.59330 | up | 2.65664 | up | 4234.77900  | 1690.87540 | 3262.92330  | 1083.02700 | Detected | Detected    | Detected    | Detected    |
| 2438 | A_23_P25964   | GALC      | Hs.513439 | galactosylceramidase                                     | Homo sapiens galactosylceramidase (GALC), transcript variant 1, mRNA [NM_000153]                                                                             | 2.59243 | up | 2.63131 | up | 7115.95000  | 2842.22680 | 4469.23300  | 1497.70840 | Detected | Detected    | Detected    | Detected    |
| 2439 | A_23_P42784   | STK31     | Hs.309767 | serine/threonine kinase 31                               | Homo sapiens serine/threonine kinase 31 (STK31), transcript variant 2, mRNA [NM_032944]                                                                      | 2.59242 | up | 2.18433 | up | 20.39498    | 8.14612    | 6.64664     | 2.68318    | Detected | Compromised | Compromised | Compromised |
| 2440 | A_24_P311604  | PACRGL    | Hs.479298 | PARK2 co-regulated-like                                  | Homo sapiens PARK2 co-regulated-like (PACRGL), transcript variant 1, mRNA [NM_145048]                                                                        | 2.59209 | up | 2.65764 | up | 868.46650   | 346.93402  | 844.30950   | 280.13700  | Detected | Detected    | Detected    | Detected    |
| 2441 | A_33_P3257903 | GSTA4     | Hs.485557 | glutathione S-transferase alpha 4                        | Homo sapiens glutathione S-transferase alpha 4 (GSTA4), mRNA [NM_001512]                                                                                     | 2.59149 | up | 2.52878 | up | 399.38144   | 159.57722  | 425.21033   | 148.27180  | Detected | Detected    | Detected    | Detected    |
| 2442 | A_33_P3681776 | LOC255512 | Hs.588291 | hypothetical LOC255512                                   | Homo sapiens hypothetical LOC255512 (LOC255512), non-coding RNA [NR_029409]                                                                                  | 2.59089 | up | 2.63010 | up | 802.41980   | 320.69052  | 773.36060   | 259.28424  | Detected | Detected    | Detected    | Detected    |
| 2443 | A_23_P204269  | USP15     | Hs.434951 | ubiquitin specific peptidase 15                          | Homo sapiens ubiquitin specific peptidase 15 (USP15), mRNA [NM_006313]                                                                                       | 2.59056 | up | 3.01874 | up | 930.65186   | 371.98550  | 711.45020   | 207.81890  | Detected | Detected    | Detected    | Detected    |
| 2444 | A_33_P3304242 | DNAI1     | Hs.112667 | dynein, axonemal, intermediate chain 1                   | Homo sapiens dynein, axonemal, intermediate chain 1 (DNAI1), mRNA [NM_012144]                                                                                | 2.58947 | up | 4.19335 | up | 13.60381    | 5.43979    | 11.74401    | 2.46957    | Detected | Compromised | Compromised | Compromised |
| 2445 | A_24_P286054  | ZFYVE16   | Hs.482660 | zinc finger, FYVE domain containing 16                   | Homo sapiens zinc finger, FYVE domain containing 16 (ZFYVE16), transcript variant 2, mRNA [NM_001105251]                                                     | 2.58824 | up | 2.68341 | up | 1249.53800  | 499.89484  | 717.17017   | 235.66797  | Detected | Detected    | Detected    | Detected    |
| 2446 | A_23_P365614  | NOTCH4    | Hs.436100 | Notch homolog 4 (Drosophila)                             | Homo sapiens Notch homolog 4 (Drosophila) (NOTCH4), mRNA [NM_004557]                                                                                         | 2.58808 | up | 2.65937 | up | 725.85767   | 290.40662  | 582.00660   | 192.98141  | Detected | Detected    | Detected    | Detected    |
| 2447 | A_33_P3223002 | GPR77     | Hs.534412 | G protein-coupled receptor 77                            | Homo sapiens G protein-coupled receptor 77 (GPR77), mRNA [NM_018485]                                                                                         | 2.58806 | up | 1.31662 | up | 14.40925    | 5.76500    | 10.84595    | 7.26395    | Detected | Compromised | Compromised | Compromised |
| 2448 | A_23_P80156   | PRMT2     | Hs.154163 | protein arginine methyltransferase 2                     | Homo sapiens protein arginine methyltransferase 2 (PRMT2), transcript variant 1, mRNA [NM_206962]                                                            | 2.58791 | up | 2.28188 | up | 1324.59620  | 529.98987  | 1296.25490  | 500.91367  | Detected | Detected    | Detected    | Detected    |
| 2449 | A_32_P420563  | RNF215    | Hs.592194 | ring finger protein 215                                  | Homo sapiens ring finger protein 215 (RNF215), mRNA [NM_001017981]                                                                                           | 2.58607 | up | 2.38356 | up | 799.20917   | 320.00253  | 362.33005   | 134.04292  | Detected | Detected    | Detected    | Detected    |

|      |               |              |           |                                                                                      |                                                                                                                                                                                                                                    |         |    |         |    |             |             |             |            |             |             |          |             |
|------|---------------|--------------|-----------|--------------------------------------------------------------------------------------|------------------------------------------------------------------------------------------------------------------------------------------------------------------------------------------------------------------------------------|---------|----|---------|----|-------------|-------------|-------------|------------|-------------|-------------|----------|-------------|
| 2450 | A_24_P370670  | LOC100130633 | Hs.533986 | hypothetical LOC100130633                                                            | ZMYM6 protein Zinc finger, MYM-type 6, isoform CRA a; [Source:UniProtKB/TrEMBL;Acc:Q8NC54] [ENST00000373337]                                                                                                                       | 2.58595 | up | 2.44763 | up | 2772.74170  | 1110.25350  | 3497.74680  | 1260.10800 | Detected    | Detected    | Detected | Detected    |
| 2451 | A_23_P330578  | LRRRC39      | Hs.44277  | leucine rich repeat containing 39                                                    | Homo sapiens leucine rich repeat containing 39 (LRRRC39), mRNA [NM_144620]                                                                                                                                                         | 2.58443 | up | 2.27984 | up | 294.63920   | 118.04792   | 196.84312   | 76.13449   | Detected    | Detected    | Detected | Detected    |
| 2452 | A_23_P331235  | C5orf38      | Hs.688017 | chromosome 5 open reading frame 38                                                   | Homo sapiens chromosome 5 open reading frame 38 (C5orf38), mRNA [NM_178569]                                                                                                                                                        | 2.58400 | up | 2.51198 | up | 322.67578   | 129.30272   | 338.18246   | 118.71370  | Detected    | Detected    | Detected | Detected    |
| 2453 | A_33_P3303464 | C19orf39     | Hs.631619 | chromosome 19 open reading frame 39                                                  | Homo sapiens chromosome 19 open reading frame 39 (C19orf39), mRNA [NM_175871]                                                                                                                                                      | 2.58382 | up | 1.74100 | up | 73.43026    | 29.42701    | 16.18536    | 8.19766    | Detected    | Detected    | Detected | Compromised |
| 2454 | A_23_P360744  | RAG1         | Hs.73958  | recombination activating gene 1                                                      | Homo sapiens recombination activating gene 1 (RAG1), mRNA [NM_000448]                                                                                                                                                              | 2.58379 | up | 3.30036 | up | 148.56260   | 59.53677    | 121.81652   | 32.54691   | Detected    | Detected    | Detected | Detected    |
| 2455 | A_23_P217297  | ZNF711       | Hs.326801 | zinc finger protein 711                                                              | Homo sapiens zinc finger protein 711 (ZNF711), mRNA [NM_021998]                                                                                                                                                                    | 2.58365 | up | 4.26820 | up | 10.09026    | 4.04391     | 16.58956    | 3.42732    | Compromised | Compromised | Detected | Compromised |
| 2456 | A_24_P228026  | CYB5D2       | Hs.513871 | cytochrome b5 domain containing 2                                                    | Homo sapiens cytochrome b5 domain containing 2 (CYB5D2), transcript variant 1, mRNA [NM_144611]                                                                                                                                    | 2.58351 | up | 2.44571 | up | 1846.20070  | 739.94870   | 2515.89620  | 907.09595  | Detected    | Detected    | Detected | Detected    |
| 2457 | A_24_P896205  | LOC645722    |           | hypothetical LOC645722                                                               | PREDICTED: Homo sapiens similar to hCG2037003 (LOC645722), mRNA [XM_944447]                                                                                                                                                        | 2.58311 | up | 2.30473 | up | 8112.39600  | 3251.91580  | 6848.17430  | 2620.11160 | Detected    | Detected    | Detected | Detected    |
| 2458 | A_23_P13663   | FAM60A       | Hs.505154 | family with sequence similarity 60, member A                                         | Homo sapiens family with sequence similarity 60, member A (FAM60A), transcript variant 2, mRNA [NM_021238]                                                                                                                         | 2.58262 | up | 2.50190 | up | 1955.51050  | 784.02954   | 1708.94540  | 602.31490  | Detected    | Detected    | Detected | Detected    |
| 2459 | A_33_P3213797 | KCNK7        | Hs.175218 | potassium channel, subfamily K, member 7                                             | Homo sapiens potassium channel, subfamily K, member 7 (KCNK7), transcript variant C, mRNA [NM_005714]                                                                                                                              | 2.58247 | up | 1.88220 | up | 96.14352    | 38.54939    | 78.07604    | 36.57773   | Detected    | Detected    | Detected | Detected    |
| 2460 | A_33_P3218960 | CACNA1H      | Hs.459642 | calcium channel, voltage-dependent, T type, alpha 1H subunit                         | Homo sapiens calcium channel, voltage-dependent, T type, alpha 1H subunit (CACNA1H), transcript variant 1, mRNA [NM_021098]                                                                                                        | 2.58157 | up | 2.86532 | up | 81.47275    | 32.67845    | 47.59345    | 14.64669   | Detected    | Detected    | Detected | Compromised |
| 2461 | A_24_P182539  | ATG4C        | Hs.7353   | ATG4 autophagy related 4 homolog C (S. cerevisiae)                                   | Cysteine protease ATG4C (EC 3.4.22--[Autophagy-related protein 4 homolog C/Autophagin-3]/[Autophagy-related cysteine endopeptidase 3/AUT-like 3 cysteine endopeptidase] [Source:UniProtKB/Swiss-Prot;Acc:Q96D16] [ENST00000317868] | 2.57985 | up | 2.35558 | up | 286.64612   | 115.04930   | 166.67702   | 62.39401   | Detected    | Detected    | Detected | Detected    |
| 2462 | A_33_P3411945 | C19orf38     | Hs.440535 | chromosome 19 open reading frame 38                                                  | Homo sapiens chromosome 19 open reading frame 38 (C19orf38), mRNA [NM_001136482]                                                                                                                                                   | 2.57956 | up | 1.94296 | up | 11.87056    | 4.76496     | 15.02921    | 6.82083    | Detected    | Compromised | Detected | Compromised |
| 2463 | A_33_P3261408 | TMIE         | Hs.185777 | transmembrane inner ear                                                              | Homo sapiens transmembrane inner ear (TMIE), mRNA [NM_147196]                                                                                                                                                                      | 2.57931 | up | 1.29515 | up | 47.96891    | 19.25707    | 29.49900    | 20.08405   | Detected    | Detected    | Detected | Detected    |
| 2464 | A_24_P217365  | ANKRD28      | Hs.335239 | ankyrin repeat domain 28                                                             | Homo sapiens ankyrin repeat domain 28 (ANKRD28), mRNA [NM_015199]                                                                                                                                                                  | 2.57930 | up | 2.16052 | up | 5978.13900  | 2399.91940  | 5291.85350  | 2159.80860 | Detected    | Detected    | Detected | Detected    |
| 2465 | A_32_P28223   |              | Hs.656851 |                                                                                      | Homo sapiens full length insert cDNA YH73H08 [AF074986]                                                                                                                                                                            | 2.57784 | up | 2.42329 | up | 219.19884   | 88.04734    | 159.30766   | 57.96906   | Detected    | Detected    | Detected | Detected    |
| 2466 | A_23_P153616  | MADCAM1      | Hs.102598 | mucosal vascular addressin cell adhesion molecule 1                                  | Homo sapiens mucosal vascular addressin cell adhesion molecule 1 (MADCAM1), transcript variant 1, mRNA [NM_130760]                                                                                                                 | 2.57709 | up | 5.17712 | up | 52.81176    | 21.21942    | 18.55060    | 3.15962    | Detected    | Detected    | Detected | Compromised |
| 2467 | A_23_P5441    | ABC86        | Hs.107911 | ATP-binding cassette, sub-family B (MDR/TAP), member 6                               | Homo sapiens ATP-binding cassette, sub-family B (MDR/TAP), member 6 (ABC86), nuclear gene encoding mitochondrial protein, mRNA [NM_005689]                                                                                         | 2.57687 | up | 2.32885 | up | 1620.53700  | 651.17773   | 1270.89180  | 481.20670  | Detected    | Detected    | Detected | Detected    |
| 2468 | A_33_P3424364 | CCDC152      | Hs.718521 | coiled-coil domain containing 152                                                    | Homo sapiens coiled-coil domain containing 152 (CCDC152), mRNA [NM_001134848]                                                                                                                                                      | 2.57615 | up | 2.91744 | up | 105.69899   | 42.48478    | 105.29570   | 31.82538   | Detected    | Detected    | Detected | Detected    |
| 2469 | A_23_P376627  | D2HGDH       | Hs.516813 | D-2-hydroxyglutarate dehydrogenase                                                   | Homo sapiens D-2-hydroxyglutarate dehydrogenase (D2HGDH), nuclear gene encoding mitochondrial protein, mRNA [NM_152783]                                                                                                            | 2.57278 | up | 2.47706 | up | 3348.77860  | 1347.77170  | 3834.78030  | 1365.11730 | Detected    | Detected    | Detected | Detected    |
| 2470 | A_23_P65983   | CCDC102A     | Hs.644611 | coiled-coil domain containing 102A                                                   | Homo sapiens coiled-coil domain containing 102A (CCDC102A), mRNA [NM_033212]                                                                                                                                                       | 2.57147 | up | 2.40137 | up | 2185.53400  | 880.05290   | 2180.18200  | 800.56860  | Detected    | Detected    | Detected | Detected    |
| 2471 | A_23_P134925  | BNIP3L       | Hs.131226 | BCL2/adenovirus E1B 19kDa interacting protein 3-like                                 | Homo sapiens BCL2/adenovirus E1B 19kDa interacting protein 3-like (BNIP3L), mRNA [NM_004331]                                                                                                                                       | 2.57142 | up | 2.58678 | up | 35592.54700 | 14332.41800 | 28244.13300 | 9627.95800 | Detected    | Detected    | Detected | Detected    |
| 2472 | A_24_P322474  | PDE4A        | Hs.89901  | phosphodiesterase 4A, cAMP-specific (phosphodiesterase E2 dunce homolog, Drosophila) | Homo sapiens phosphodiesterase 4A, cAMP-specific (phosphodiesterase E2 dunce homolog, Drosophila) (PDE4A), transcript variant 4, mRNA [NM_006202]                                                                                  | 2.57136 | up | 2.38718 | up | 19486.50600 | 7847.01000  | 15701.84400 | 5800.03270 | Detected    | Detected    | Detected | Detected    |
| 2473 | A_23_P74391   | OPN3         | Hs.409081 | opsin 3                                                                              | Homo sapiens opsin 3 (OPN3), mRNA [NM_014322]                                                                                                                                                                                      | 2.57098 | up | 2.43247 | up | 715.10810   | 288.00928   | 624.65660   | 226.44370  | Detected    | Detected    | Detected | Detected    |
| 2474 | A_23_P332584  | KIAA1107     | Hs.21554  | KIAA1107                                                                             | Homo sapiens KIAA1107 (KIAA1107), mRNA [NM_015237]                                                                                                                                                                                 | 2.57058 | up | 2.06793 | up | 48.87008    | 19.68544    | 34.45197    | 14.69076   | Detected    | Detected    | Detected | Compromised |
| 2475 | A_23_P211136  | BRWD1        | Hs.654740 | bromodomain and WD repeat domain containing 1                                        | Homo sapiens bromodomain and WD repeat domain containing 1 (BRWD1), transcript variant 1, mRNA [NM_018963]                                                                                                                         | 2.56971 | up | 2.54907 | up | 413.68164   | 166.69190   | 310.11346   | 107.27631  | Detected    | Detected    | Detected | Detected    |
| 2476 | A_33_P3227506 | BPTF         | Hs.444200 | bromodomain PHD finger transcription factor                                          | Homo sapiens bromodomain PHD finger transcription factor (BPTF), transcript variant 1, mRNA [NM_182641]                                                                                                                            | 2.56887 | up | 2.45019 | up | 281.86447   | 113.61377   | 164.19461   | 59.09148   | Detected    | Detected    | Detected | Detected    |
| 2477 | A_23_P127840  | ZNF214       | Hs.445849 | zinc finger protein 214                                                              | Homo sapiens zinc finger protein 214 (ZNF214), mRNA [NM_013249]                                                                                                                                                                    | 2.56827 | up | 2.52110 | up | 55.03595    | 22.18910    | 45.79773    | 16.01841   | Detected    | Detected    | Detected | Detected    |

|      |               |              |           |                                                                                                              |                                                                                                                                                          |         |    |         |             |            |             |            |          |             |             |             |
|------|---------------|--------------|-----------|--------------------------------------------------------------------------------------------------------------|----------------------------------------------------------------------------------------------------------------------------------------------------------|---------|----|---------|-------------|------------|-------------|------------|----------|-------------|-------------|-------------|
| 2478 | A_33_P3263569 | AKNAD1       | Hs.720879 | AKNA domain containing 1                                                                                     | Homo sapiens AKNA domain containing 1 (AKNAD1), mRNA [NM_152763]                                                                                         | 2.56826 | up | 3.06632 | 113.92490   | 45.93173   | 52.07269    | 14.97472   | Detected | Detected    | Detected    | Compromised |
| 2479 | A_23_P82929   | NOV          | Hs.235935 | nephroblastoma overexpressed gene                                                                            | Homo sapiens nephroblastoma overexpressed gene (NOV), mRNA [NM_002514]                                                                                   | 2.56731 | up | 2.56602 | 1332.33900  | 537.36426  | 1363.50020  | 468.55453  | Detected | Detected    | Detected    | Detected    |
| 2480 | A_33_P3392952 | FOXP2        | Hs.591140 | forkhead box K2                                                                                              | Homo sapiens forkhead box K2 (FOXP2), mRNA [NM_004514]                                                                                                   | 2.56658 | up | 2.87487 | 2116.57800  | 853.90980  | 1245.26830  | 381.95355  | Detected | Detected    | Detected    | Detected    |
| 2481 | A_33_P3364696 | STAMPB       | Hs.469018 | STAM binding protein                                                                                         | Homo sapiens STAM binding protein (STAMPB), transcript variant 3, mRNA [NM_213622]                                                                       | 2.56559 | up | 2.51906 | 676.54870   | 273.05200  | 626.55610   | 219.32414  | Detected | Detected    | Detected    | Detected    |
| 2482 | A_23_P352799  | NPW          | Hs.233533 | neuropeptide W                                                                                               | Homo sapiens neuropeptide W (NPW), mRNA [NM_001099456]                                                                                                   | 2.56495 | up | 2.14980 | 109.70782   | 44.28859   | 130.21352   | 53.41021   | Detected | Detected    | Detected    | Detected    |
| 2483 | A_33_P3331426 | LOC100133086 | Hs.631791 | hypothetical LOC100133086                                                                                    | PREDICTED: Homo sapiens hypothetical LOC100133086 (LOC100133086), mRNA [XM_001723511]                                                                    | 2.56313 | up | 1.56197 | 337.43463   | 136.31741  | 29.14687    | 16.45449   | Detected | Detected    | Detected    | Detected    |
| 2484 | A_33_P3422581 | C2orf86      | Hs.414952 | chromosome 2 open reading frame 86                                                                           | Homo sapiens chromosome 2 open reading frame 86 (C2orf86), transcript variant 2, mRNA [NM_015910]                                                        | 2.56234 | up | 2.27748 | 134.61362   | 54.39821   | 122.18694   | 47.30804   | Detected | Detected    | Detected    | Detected    |
| 2485 | A_33_P3252333 | SNORD3B-1    | Hs.656815 | small nucleolar RNA, C/D box 3B-1                                                                            | Homo sapiens small nucleolar RNA, C/D box 3B-1 (SNORD3B-1), small nucleolar RNA [NR_003271]                                                              | 2.56215 | up | 2.45220 | 4319.25500  | 1745.57130 | 4004.44920  | 1439.96830 | Detected | Detected    | Detected    | Detected    |
| 2486 | A_23_P201368  | CTBS         | Hs.513557 | chitinase, di-N-acetyl-                                                                                      | Homo sapiens chitinase, di-N-acetyl- (CTBS), mRNA [NM_004388]                                                                                            | 2.56188 | up | 2.67730 | 2628.13260  | 1062.23830 | 2341.48600  | 771.18690  | Detected | Detected    | Detected    | Detected    |
| 2487 | A_23_P128574  | ENOX1        | Hs.128258 | ecto-NOX disulfide-thiol exchanger 1                                                                         | Homo sapiens ecto-NOX disulfide-thiol exchanger 1 (ENOX1), transcript variant 1, mRNA [NM_017993]                                                        | 2.56176 | up | 2.49270 | 750.96000   | 303.53700  | 588.78780   | 208.28291  | Detected | Detected    | Detected    | Detected    |
| 2488 | A_24_P334640  | PAQR8        | Hs.239388 | progesterin and adipoQ receptor family member VIII                                                           | Homo sapiens progesterin and adipoQ receptor family member VIII (PAQR8), mRNA [NM_133367]                                                                | 2.56098 | up | 3.08063 | 101.20309   | 40.91867   | 121.41171   | 34.75251   | Detected | Detected    | Detected    | Detected    |
| 2489 | A_23_P315892  | ST6GALNAC6   | Hs.109672 | ST6 (alpha-N-acetylneuraminyl-2,3-beta-galactosyl-1,3)-N-acetylgalactosaminide alpha-2,6-sialyltransferase 6 | Homo sapiens ST6 (alpha-N-acetylneuraminyl-2,3-beta-galactosyl-1,3)-N-acetylgalactosaminide alpha-2,6-sialyltransferase 6 (ST6GALNAC6), mRNA [NM_013443] | 2.56088 | up | 2.29051 | 16830.12500 | 6805.05200 | 12706.80900 | 4891.80500 | Detected | Detected    | Detected    | Detected    |
| 2490 | A_33_P3399988 | HCP5P10      | Hs.662200 | HLA complex P5 pseudogene 10                                                                                 | Homo sapiens HLA complex P5 pseudogene 10, mRNA (cDNA clone IMAGE:5582570) [BC035828]                                                                    | 2.56078 | up | 2.47601 | 19.09507    | 7.72116    | 23.92854    | 8.52175    | Detected | Compromised | Detected    | Compromised |
| 2491 | A_24_P588897  | SLCO3A1      | Hs.311187 | solute carrier organic anion transporter family, member 3A1                                                  | Homo sapiens solute carrier organic anion transporter family, member 3A1 (SLCO3A1), transcript variant 1, mRNA [NM_013272]                               | 2.56047 | up | 2.55209 | 917.50476   | 371.04025  | 495.03983   | 171.04492  | Detected | Detected    | Detected    | Detected    |
| 2492 | A_24_P535219  | PHF10        | Hs.435933 | PHD finger protein 10                                                                                        | Homo sapiens mRNA full length insert cDNA clone EUROIIMAGE 2120537 [AJ420510]                                                                            | 2.55934 | up | 2.82864 | 347.87400   | 140.74320  | 225.31897   | 70.24012   | Detected | Detected    | Detected    | Detected    |
| 2493 | A_32_P353072  | TMEM106B     | Hs.396358 | transmembrane protein 106B                                                                                   | Homo sapiens transmembrane protein 106B (TMEM106B), transcript variant 1, mRNA [NM_018374]                                                               | 2.55811 | up | 2.73740 | 5253.55200  | 2126.51100 | 3789.75000  | 1220.78020 | Detected | Detected    | Detected    | Detected    |
| 2494 | A_33_P3385436 | PLAC8L1      | Hs.162369 | PLAC8-like 1                                                                                                 | Homo sapiens PLAC8-like 1 (PLAC8L1), mRNA [NM_001029869]                                                                                                 | 2.55790 | up | 2.27651 | 49.20490    | 19.91855   | 41.85890    | 16.21374   | Detected | Detected    | Detected    | Detected    |
| 2495 | A_23_P4144    | COASY        | Hs.709231 | Coenzyme A synthase                                                                                          | Homo sapiens Coenzyme A synthase (COASY), nuclear gene encoding mitochondrial protein, transcript variant 1, mRNA [NM_025233]                            | 2.55699 | up | 1.50277 | 4304.25700  | 1743.01970 | 4997.48440  | 2932.41720 | Detected | Detected    | Detected    | Detected    |
| 2496 | A_33_P3692756 | LOC723809    | Hs.124316 | hypothetical LOC723809                                                                                       | Homo sapiens hypothetical LOC723809 (LOC723809), non-coding RNA [NR_027374]                                                                              | 2.55584 | up | 3.19100 | 50.07978    | 20.28904   | 30.61544    | 8.46016    | Detected | Detected    | Detected    | Compromised |
| 2497 | A_32_P128209  | C5orf27      | Hs.8373   | chromosome 5 open reading frame 27                                                                           | Homo sapiens chromosome 5 open reading frame 27 (C5orf27), non-coding RNA [NR_026936]                                                                    | 2.55566 | up | 3.13791 | 343.63568   | 139.22878  | 281.45860   | 79.09323   | Detected | Detected    | Detected    | Detected    |
| 2498 | A_24_P586390  | LOC100133331 | Hs.646112 | hypothetical LOC100133331                                                                                    | Homo sapiens hypothetical LOC100133331 (LOC100133331), non-coding RNA [NR_028327]                                                                        | 2.55533 | up | 2.57882 | 128.08100   | 51.90045   | 89.97714    | 30.76644   | Detected | Detected    | Detected    | Detected    |
| 2499 | A_33_P3422991 | SLC36A4      | Hs.148766 | solute carrier family 36 (proton/ amino acid symporter), member 4                                            | Homo sapiens solute carrier family 36 (proton/ amino acid symporter), member 4 (SLC36A4), mRNA [NM_152313]                                               | 2.55463 | up | 2.55179 | 1662.41760  | 673.82120  | 1322.35400  | 456.94946  | Detected | Detected    | Detected    | Detected    |
| 2500 | A_24_P3140    | ZNF638       | Hs.434401 | zinc finger protein 638                                                                                      | Homo sapiens zinc finger protein 638 (ZNF638), transcript variant 1, mRNA [NM_014497]                                                                    | 2.55414 | up | 2.69446 | 1232.22310  | 499.54898  | 653.93414   | 214.00693  | Detected | Detected    | Detected    | Detected    |
| 2501 | A_24_P281439  | OR2T5        | Hs.553808 | olfactory receptor, family 2, subfamily T, member 5                                                          | Homo sapiens olfactory receptor, family 2, subfamily T, member 5 (OR2T5), mRNA [NM_001004697]                                                            | 2.55373 | up | 1.59558 | 14.86529    | 6.02743    | 8.09551     | 4.47396    | Detected | Compromised | Compromised | Compromised |
| 2502 | A_33_P3434927 | PR47         | Hs.683780 | platelet receptor for type III collagen, 47 kDa                                                              | Homo sapiens platelet receptor for type III collagen mRNA, partial cds [AF521131]                                                                        | 2.55275 | up | 3.07418 | 26.88312    | 10.90445   | 17.25789    | 4.95021    | Detected | Compromised | Compromised | Compromised |
| 2503 | A_24_P702813  | XPR1         | Hs.227656 | xenotropic and polytropic retrovirus receptor                                                                | Homo sapiens xenotropic and polytropic retrovirus receptor (XPR1), transcript variant 1, mRNA [NM_004736]                                                | 2.55273 | up | 2.84380 | 1053.15190  | 427.18893  | 618.54250   | 191.79468  | Detected | Detected    | Detected    | Detected    |
| 2504 | A_23_P53866   | COG6         | Hs.507805 | component of oligomeric golgi complex 6                                                                      | Homo sapiens component of oligomeric golgi complex 6 (COG6), transcript variant 1, mRNA [NM_020751]                                                      | 2.55239 | up | 2.85614 | 2345.11230  | 951.36870  | 1641.21730  | 506.70108  | Detected | Detected    | Detected    | Detected    |
| 2505 | A_23_P255331  | C4orf49      | Hs.710036 | chromosome 4 open reading frame 49                                                                           | Homo sapiens chromosome 4 open reading frame 49 (C4orf49), mRNA [NM_032623]                                                                              | 2.55233 | up | 2.52796 | 424.66510   | 172.28300  | 345.81552   | 120.62577  | Detected | Detected    | Detected    | Detected    |
| 2506 | A_33_P3250963 | TP53TG1      | Hs.274329 | TP53 target 1 (non-protein coding)                                                                           | Homo sapiens TP53 target 1 (non-protein coding) (TP53TG1), non-coding RNA [NR_015381]                                                                    | 2.55193 | up | 2.60945 | 591.67380   | 240.07510  | 1034.71280  | 349.65170  | Detected | Detected    | Detected    | Detected    |

|      |               |              |           |                                                                                  |                                                                                                                           |         |    |          |    |             |             |             |            |             |              |             |             |
|------|---------------|--------------|-----------|----------------------------------------------------------------------------------|---------------------------------------------------------------------------------------------------------------------------|---------|----|----------|----|-------------|-------------|-------------|------------|-------------|--------------|-------------|-------------|
| 2507 | A_24_P244442  | BSCL2        | Hs.533709 | Berardinelli-Seip congenital lipodystrophy 2 (seipin)                            | Homo sapiens Berardinelli-Seip congenital lipodystrophy 2 (seipin) (BSCL2), transcript variant 2, mRNA [NM_032667]        | 2.55073 | up | 2.28097  | up | 1259.10050  | 511.12753   | 1196.69920  | 462.62723  | Detected    | Detected     | Detected    | Detected    |
| 2508 | A_33_P3366987 | GPR125       | Hs.99195  | G protein-coupled receptor 125                                                   | Homo sapiens G protein-coupled receptor 125 (GPR125), mRNA [NM_145290]                                                    | 2.54863 | up | 2.86022  | up | 280.18810   | 113.83508   | 231.64964   | 71.41628   | Detected    | Detected     | Detected    | Detected    |
| 2509 | A_23_P111919  | PURG         | Hs.373778 | purine-rich element binding protein G                                            | Homo sapiens purine-rich element binding protein G (PURG), transcript variant A, mRNA [NM_013357]                         | 2.54831 | up | 4.48056  | up | 50.30246    | 20.43952    | 22.47478    | 4.42312    | Detected    | Not Detected | Detected    | Compromised |
| 2510 | A_23_P141893  | FLJ40125     | Hs.532872 | protein phosphatase 1B-like                                                      | Homo sapiens protein phosphatase 1B-like (FLJ40125), mRNA [NM_001080401]                                                  | 2.54808 | up | 2.71459  | up | 608.44556   | 247.25294   | 491.24830   | 159.57416  | Detected    | Detected     | Detected    | Detected    |
| 2511 | A_33_P3351686 | CCDC17       | Hs.18912  | coiled-coil domain containing 17                                                 | Homo sapiens coiled-coil domain containing 17 (CCDC17), mRNA [NM_001114938]                                               | 2.54800 | up | 4.60091  | up | 9.26591     | 3.76549     | 16.31429    | 3.12673    | Compromised | Compromised  | Detected    | Compromised |
| 2512 | A_23_P502590  | KIR2DS4      | Hs.654608 | killer cell immunoglobulin-like receptor, two domains, short cytoplasmic tail, 4 | Homo sapiens killer cell immunoglobulin-like receptor, two domains, short cytoplasmic tail, 4 (KIR2DS4), mRNA [NM_012314] | 2.54554 | up | 1.78163  | up | 36.19452    | 14.72299    | 8.09144     | 4.00474    | Detected    | Compromised  | Compromised | Compromised |
| 2513 | A_33_P3252236 | N6AMT1       |           | N-6 adenine-specific DNA methyltransferase 1 (putative)                          | Homo sapiens N-6 adenine-specific DNA methyltransferase 1 (putative) (N6AMT1), transcript variant 1, mRNA [NM_013240]     | 2.54454 | up | 2.47341  | up | 675.44366   | 274.86060   | 569.93463   | 203.18623  | Detected    | Detected     | Detected    | Detected    |
| 2514 | A_23_P134684  | HMBOX1       | Hs.591836 | homeobox containing 1                                                            | Homo sapiens homeobox containing 1 (HMBOX1), transcript variant 1, mRNA [NM_024567]                                       | 2.54452 | up | 2.34208  | up | 2018.79080  | 821.52050   | 1518.69540  | 571.78630  | Detected    | Detected     | Detected    | Detected    |
| 2515 | A_32_P100439  | C7orf41      | Hs.200100 | chromosome 7 open reading frame 41                                               | Homo sapiens chromosome 7 open reading frame 41 (C7orf41), mRNA [NM_152793]                                               | 2.54318 | up | 2.59148  | up | 5673.55960  | 2310.00050  | 5604.21400  | 1906.91660 | Detected    | Detected     | Detected    | Detected    |
| 2516 | A_33_P3405424 | IL4I1        | Hs.574492 | interleukin 4 induced 1                                                          | Homo sapiens interleukin 4 induced 1 (IL4I1), transcript variant 2, mRNA [NM_172374]                                      | 2.54275 | up | 2.42112  | up | 726.06550   | 295.66858   | 908.05230   | 330.71964  | Detected    | Detected     | Detected    | Detected    |
| 2517 | A_23_P154962  | RIMBP3       | Hs.115429 | RIMS binding protein 3                                                           | Homo sapiens RIMS binding protein 3 (RIMBP3), mRNA [NM_015672]                                                            | 2.54226 | up | 2.45647  | up | 894.64703   | 364.38824   | 848.51650   | 304.58942  | Detected    | Detected     | Detected    | Detected    |
| 2518 | A_23_P89902   | RTN2         | Hs.47517  | reticulum 2                                                                      | Homo sapiens reticulum 2 (RTN2), transcript variant 1, mRNA [NM_005819]                                                   | 2.54169 | up | 2.33003  | up | 1591.60080  | 648.40295   | 1696.65720  | 642.09375  | Detected    | Detected     | Detected    | Detected    |
| 2519 | A_23_P88522   | NMB          | Hs.386470 | neuromedin B                                                                     | Homo sapiens neuromedin B (NMB), transcript variant 1, mRNA [NM_021077]                                                   | 2.54156 | up | 2.36949  | up | 27510.66800 | 11208.14550 | 25028.99800 | 9314.37700 | Detected    | Detected     | Detected    | Detected    |
| 2520 | A_33_P3336878 | TMEM180      | Hs.309069 | transmembrane protein 180                                                        | Homo sapiens transmembrane protein 180 (TMEM180), mRNA [NM_024789]                                                        | 2.54115 | up | 1.63440  | up | 29.07715    | 11.84825    | 34.67252    | 18.70655   | Detected    | Compromised  | Detected    | Detected    |
| 2521 | A_33_P3239455 | GTF2IRD2     | Hs.647017 | GTF2I repeat domain containing 2                                                 | Homo sapiens GTF2I repeat domain containing 2 (GTF2IRD2), mRNA [NM_173537]                                                | 2.54103 | up | 3.36848  | up | 58.94321    | 24.01915    | 39.85822    | 10.43398   | Detected    | Detected     | Detected    | Compromised |
| 2522 | A_33_P3399045 |              |           |                                                                                  | Putative uncharacterized protein ENSP00000366043 [Source:UniProtKB/TrEMBL;Acc:Q8N5B5] [ENST00000376847]                   | 2.54032 | up | 4.54818  | up | 18.01595    | 7.34349     | 13.11943    | 2.54357    | Detected    | Compromised  | Detected    | Compromised |
| 2523 | A_33_P3422298 |              | Hs.547600 |                                                                                  | Putative uncharacterized protein ENSP00000374658 Fragment [Source:UniProtKB/TrEMBL;Acc:A6NKU1] [ENST00000390329]          | 2.53866 | up | 2.22408  | up | 75.83568    | 30.93161    | 49.64283    | 19.68213   | Detected    | Detected     | Detected    | Detected    |
| 2524 | A_23_P328323  | RAVER2       | Hs.591443 | ribonucleoprotein, PTB-binding 2                                                 | Homo sapiens ribonucleoprotein, PTB-binding 2 (RAVER2), mRNA [NM_018211]                                                  | 2.53834 | up | 3.06399  | up | 155.08539   | 63.26355    | 147.29219   | 42.38940   | Detected    | Detected     | Detected    | Detected    |
| 2525 | A_32_P84728   | LOC100131727 | Hs.563183 | hypothetical LOC100131727                                                        | PREDICTED: Homo sapiens hypothetical LOC100131727 (LOC100131727), mRNA [XM_001723766]                                     | 2.53781 | up | 2.51189  | up | 255.97444   | 104.44083   | 145.09705   | 50.93578   | Detected    | Detected     | Detected    | Detected    |
| 2526 | A_24_P381136  | PAC3IN3      | Hs.334639 | protein kinase C and casein kinase substrate in neurons 3                        | Homo sapiens protein kinase C and casein kinase substrate in neurons 3 (PAC3IN3), mRNA [NM_016223]                        | 2.53732 | up | 2.03964  | up | 1187.30600  | 484.53012   | 1297.02200  | 560.73750  | Detected    | Detected     | Detected    | Detected    |
| 2527 | A_24_P131236  | SV2A         | Hs.516153 | synaptic vesicle glycoprotein 2A                                                 | Homo sapiens synaptic vesicle glycoprotein 2A (SV2A), mRNA [NM_014849]                                                    | 2.53675 | up | 2.78221  | up | 61.55216    | 25.12457    | 38.89967    | 12.32882   | Detected    | Detected     | Detected    | Compromised |
| 2528 | A_23_P130753  | DBP          | Hs.414480 | D site of albumin promoter (albumin D-box) binding protein                       | Homo sapiens D site of albumin promoter (albumin D-box) binding protein (DBP), mRNA [NM_001352]                           | 2.53651 | up | 2.20791  | up | 151.31460   | 61.77008    | 177.32323   | 70.81892   | Detected    | Detected     | Detected    | Detected    |
| 2529 | A_33_P3792489 | C21orf89     | Hs.375832 | chromosome 21 open reading frame 89                                              | UI-E-CRO-adm-a-05-Ul.r1 UI-E-CRO-adm-a-05-Ul.r1, mRNA sequence [BM686390]                                                 | 2.53649 | up | 5.19961  | up | 41.06067    | 16.76201    | 45.48657    | 7.71397    | Detected    | Detected     | Detected    | Compromised |
| 2530 | A_24_P148750  | SH3BP5       | Hs.719150 | SH3-domain binding protein 5 (BTK-associated)                                    | Homo sapiens SH3-domain binding protein 5 (BTK-associated) (SH3BP5), transcript variant 1, mRNA [NM_004844]               | 2.53490 | up | 2.59639  | up | 1563.42740  | 638.63153   | 1188.71410  | 403.71307  | Detected    | Detected     | Detected    | Detected    |
| 2531 | A_23_P81898   | UBD          | Hs.44532  | ubiquitin D                                                                      | Homo sapiens ubiquitin D (UBD), mRNA [NM_006398]                                                                          | 2.53333 | up | 20.46355 | up | 121.89443   | 49.74078    | 72.73988    | 3.13442    | Detected    | Detected     | Detected    | Compromised |
| 2532 | A_23_P303423  | SLAIN2       | Hs.479677 | SLAIN motif family, member 2                                                     | Homo sapiens SLAIN motif family, member 2 (SLAIN2), mRNA [NM_020846]                                                      | 2.53258 | up | 2.22885  | up | 109.06348   | 44.59124    | 81.25543    | 32.14678   | Detected    | Detected     | Detected    | Detected    |
| 2533 | A_24_P386622  | ARRB1        | Hs.503284 | arrestin, beta 1                                                                 | Homo sapiens arrestin, beta 1 (ARRB1), transcript variant 1, mRNA [NM_004041]                                             | 2.53110 | up | 1.98862  | up | 243.61226   | 99.66040    | 184.05457   | 81.61316   | Detected    | Detected     | Detected    | Detected    |
| 2534 | A_23_P115597  | ANKRD26      | Hs.361041 | ankyrin repeat domain 26                                                         | Homo sapiens ankyrin repeat domain 26 (ANKRD26), mRNA [NM_014915]                                                         | 2.53097 | up | 2.49812  | up | 317.10880   | 129.73405   | 268.57310   | 94.80158   | Detected    | Detected     | Detected    | Detected    |
| 2535 | A_23_P132763  | VGLL3        | Hs.720159 | vestigial like 3 (Drosophila)                                                    | Homo sapiens vestigial like 3 (Drosophila) (VGLL3), mRNA [NM_016206]                                                      | 2.53085 | up | 2.54984  | up | 3788.87330  | 1550.15930  | 2621.36740  | 906.52710  | Detected    | Detected     | Detected    | Detected    |
| 2536 | A_33_P3385842 | CCDC7        | Hs.585464 | coiled-coil domain containing 7                                                  | Homo sapiens coiled-coil domain containing 7 (CCDC7), transcript variant 1, mRNA [NM_145023]                              | 2.52976 | up | 2.44694  | up | 36.84833    | 15.08246    | 26.65815    | 9.60665    | Detected    | Detected     | Detected    | Compromised |

|      |               |              |           |                                                                |                                                                                                                                                                                                                                |         |    |         |    |             |             |             |             |             |             |             |             |
|------|---------------|--------------|-----------|----------------------------------------------------------------|--------------------------------------------------------------------------------------------------------------------------------------------------------------------------------------------------------------------------------|---------|----|---------|----|-------------|-------------|-------------|-------------|-------------|-------------|-------------|-------------|
| 2537 | A_33_P3227225 | LOC100130141 | Hs.722967 | hypothetical LOC100130141                                      | PREDICTED: Homo sapiens similar to Kruppel-like factor (LOC100130141), miscRNA [XR_037929]                                                                                                                                     | 2.52902 | up | 2.43502 | up | 229.08170   | 93.79324    | 150.55179   | 54.51918    | Detected    | Detected    | Detected    | Detected    |
| 2538 | A_33_P3569555 | LOC253264    | Hs.682111 | hypothetical protein LOC253264                                 | Homo sapiens cDNA FLJ13383 fis, clone PLACE1001024 [AK023445]                                                                                                                                                                  | 2.52611 | up | 3.54908 | up | 29.08017    | 11.92004    | 22.67742    | 5.63434     | Detected    | Compromised | Detected    | Compromised |
| 2539 | A_33_P3409261 | LOC729421    | Hs.646665 | hypothetical LOC729421                                         | PREDICTED: Homo sapiens hypothetical LOC729421 (LOC729421), mRNA [XM_001133682]                                                                                                                                                | 2.52596 | up | 2.56633 | up | 173.21000   | 71.00346    | 192.46850   | 66.13221    | Detected    | Detected    | Detected    | Detected    |
| 2540 | A_33_P3391791 | MOG          | Hs.141308 | myelin oligodendrocyte glycoprotein                            | Homo sapiens myelin oligodendrocyte glycoprotein (MOG), transcript variant alpha4, mRNA [NM_206814]                                                                                                                            | 2.52569 | up | 2.57038 | up | 19.41591    | 7.95996     | 11.50257    | 3.94605     | Detected    | Compromised | Compromised | Compromised |
| 2541 | A_23_P218597  | NPAS2        | Hs.156832 | neuronal PAS domain protein 2                                  | Homo sapiens neuronal PAS domain protein 2 (NPAS2), mRNA [NM_002518]                                                                                                                                                           | 2.52561 | up | 2.33051 | up | 320.64136   | 131.45767   | 348.08838   | 131.70540   | Detected    | Detected    | Detected    | Detected    |
| 2542 | A_24_P237757  |              | Hs.644041 |                                                                | Zinc finger MYM-type protein 2 (Zinc finger protein 198)(Fused in myeloproliferative disorders protein)(Rearranged in atypical myeloproliferative disorder protein) [Source:UniProtKB/Swiss-Prot;Acc:Q9UBW7] [ENST00000382881] | 2.52482 | up | 2.42816 | up | 794.61456   | 325.88170   | 455.68137   | 165.48135   | Detected    | Detected    | Detected    | Detected    |
| 2543 | A_23_P61674   | CLK4         | Hs.406557 | CDC-like kinase 4                                              | Homo sapiens CDC-like kinase 4 (CLK4), mRNA [NM_020666]                                                                                                                                                                        | 2.52293 | up | 2.71019 | up | 1461.13000  | 599.67650   | 1211.53500  | 394.18660   | Detected    | Detected    | Detected    | Detected    |
| 2544 | A_33_P3422233 | KIAA1530     | Hs.380475 | KIAA1530                                                       | Homo sapiens KIAA1530 (KIAA1530), mRNA [NM_020894]                                                                                                                                                                             | 2.52032 | up | 2.60114 | up | 1540.61290  | 632.95105   | 1014.71936  | 343.99203   | Detected    | Detected    | Detected    | Detected    |
| 2545 | A_24_P208909  | TRIM2        | Hs.435711 | tripartite motif-containing 2                                  | Homo sapiens tripartite motif-containing 2 (TRIM2), transcript variant 1, mRNA [NM_015271]                                                                                                                                     | 2.51913 | up | 2.57016 | up | 1864.69650  | 766.46344   | 1235.39750  | 423.85010   | Detected    | Detected    | Detected    | Detected    |
| 2546 | A_33_P3546070 | PHF20L1      | Hs.304362 | PHD finger protein 20-like 1                                   | Homo sapiens PHD finger protein 20-like 1 (PHF20L1), transcript variant 1, mRNA [NM_016018]                                                                                                                                    | 2.51863 | up | 2.13093 | up | 1476.69310  | 607.09766   | 1269.07090  | 525.14935   | Detected    | Detected    | Detected    | Detected    |
| 2547 | A_23_P26439   | DBNDD1       | Hs.301394 | dysbindin (dystrobrevin binding protein 1) domain containing 1 | Homo sapiens dysbindin (dystrobrevin binding protein 1) domain containing 1 (DBNDD1), transcript variant 1, mRNA [NM_001042610]                                                                                                | 2.51806 | up | 1.57371 | up | 19.79746    | 8.14097     | 25.62077    | 14.35598    | Detected    | Compromised | Detected    | Detected    |
| 2548 | A_33_P3221403 |              | Hs.710766 |                                                                | Putative uncharacterized protein ENSP00000386773 [Source:UniProtKB/TrEMBL;Acc:BA09] [ENST00000409259]                                                                                                                          | 2.51690 | up | 1.18266 | up | 8.22852     | 3.38524     | 17.73204    | 13.22099    | Compromised | Compromised | Detected    | Compromised |
| 2549 | A_24_P11462   | ADC          | Hs.101807 | arginine decarboxylase                                         | Homo sapiens arginine decarboxylase (ADC), mRNA [NM_052998]                                                                                                                                                                    | 2.51605 | up | 2.34406 | up | 1275.58650  | 524.95636   | 1247.45320  | 469.26810   | Detected    | Detected    | Detected    | Detected    |
| 2550 | A_23_P314120  | CHKB         | Hs.654827 | choline kinase beta                                            | Homo sapiens choline kinase beta (CHKB), mRNA [NM_005198]                                                                                                                                                                      | 2.51436 | up | 2.65572 | up | 1945.75070  | 801.29610   | 1746.35270  | 579.85000   | Detected    | Detected    | Detected    | Detected    |
| 2551 | A_23_P129085  | SPESP1       | Hs.657932 | sperm equatorial segment protein 1                             | Homo sapiens sperm equatorial segment protein 1 (SPESP1), mRNA [NM_145658]                                                                                                                                                     | 2.51333 | up | 2.62994 | up | 453.54560   | 186.85470   | 337.27563   | 113.08470   | Detected    | Detected    | Detected    | Detected    |
| 2552 | A_23_P71300   | CODC25       | Hs.445512 | coiled-coil domain containing 25                               | Homo sapiens coiled-coil domain containing 25 (CODC25), mRNA [NM_018246]                                                                                                                                                       | 2.51302 | up | 2.93496 | up | 2156.07980  | 888.38790   | 1823.22910  | 547.77760   | Detected    | Detected    | Detected    | Detected    |
| 2553 | A_23_P358662  | KIAA1712     | Hs.555989 | KIAA1712                                                       | Homo sapiens KIAA1712 (KIAA1712), transcript variant 1, mRNA [NM_01040157]                                                                                                                                                     | 2.51280 | up | 2.92917 | up | 699.72003   | 288.33597   | 444.88538   | 133.92720   | Detected    | Detected    | Detected    | Detected    |
| 2554 | A_32_P28939   | ALKBH2       | Hs.374458 | alkB, alkylation repair homolog 2 (E. coli)                    | Homo sapiens alkB, alkylation repair homolog 2 (E. coli) (ALKBH2), transcript variant 2, mRNA [NM_001001655]                                                                                                                   | 2.51170 | up | 2.32059 | up | 7601.20070  | 3133.63350  | 9921.27000  | 3769.93870  | Detected    | Detected    | Detected    | Detected    |
| 2555 | A_23_P46378   | PIGV         | Hs.259605 | phosphatidylinositol glycan anchor biosynthesis, class V       | Homo sapiens phosphatidylinositol glycan anchor biosynthesis, class V (PIGV), mRNA [NM_017837]                                                                                                                                 | 2.51092 | up | 2.86928 | up | 1035.71670  | 427.11154   | 783.38560   | 240.75099   | Detected    | Detected    | Detected    | Detected    |
| 2556 | A_33_P3246133 | HPCA         | Hs.632391 | hippocalcin                                                    | Homo sapiens hippocalcin (HPCA), mRNA [NM_002143]                                                                                                                                                                              | 2.50974 | up | 1.94236 | up | 17.34007    | 7.15411     | 15.09058    | 6.85082     | Detected    | Compromised | Compromised | Compromised |
| 2557 | A_23_P15272   | ABCC6        | Hs.442182 | ATP-binding cassette, sub-family C (CFTR/MRP), member 6        | Homo sapiens ATP-binding cassette, sub-family C (CFTR/MRP), member 6 (ABCC6), transcript variant 2, mRNA [NM_001079528]                                                                                                        | 2.50861 | up | 3.42489 | up | 742.62714   | 306.52844   | 403.74457   | 103.95039   | Detected    | Detected    | Detected    | Detected    |
| 2558 | A_33_P3399880 | TYRP1        | Hs.270279 | tyrosinase-related protein 1                                   | Homo sapiens tyrosinase-related protein 1 (TYRP1), mRNA [NM_000550]                                                                                                                                                            | 2.50812 | up | 4.77164 | up | 17.90754    | 7.39301     | 13.47027    | 2.48928     | Detected    | Compromised | Detected    | Compromised |
| 2559 | A_23_P205531  | RNASE4       | Hs.283749 | ribonuclease, RNase A family, 4                                | Homo sapiens ribonuclease, RNase A family, 4 (RNASE4), transcript variant 2, mRNA [NM_002937]                                                                                                                                  | 2.50771 | up | 2.41746 | up | 2726.94820  | 1125.98460  | 2920.86770  | 1065.41130  | Detected    | Detected    | Detected    | Detected    |
| 2560 | A_24_P911676  | SOX4         | Hs.643910 | SRY (sex determining region Y)-box 4                           | Homo sapiens SRY (sex determining region Y)-box 4 (SOX4), mRNA [NM_003107]                                                                                                                                                     | 2.50706 | up | 2.24490 | up | 1557.54660  | 643.29395   | 1236.70000  | 485.77222   | Detected    | Detected    | Detected    | Detected    |
| 2561 | A_23_P162746  | CRYL1        | Hs.370703 | crystallin, lambda 1                                           | Homo sapiens crystallin, lambda 1 (CRYL1), mRNA [NM_015974]                                                                                                                                                                    | 2.50692 | up | 2.55850 | up | 10214.54600 | 4219.01700  | 10386.29100 | 3579.64820  | Detected    | Detected    | Detected    | Detected    |
| 2562 | A_23_P386268  | C4orf26      | Hs.24510  | chromosome 4 open reading frame 26                             | Homo sapiens chromosome 4 open reading frame 26 (C4orf26), mRNA [NM_178497]                                                                                                                                                    | 2.50668 | up | 1.46431 | up | 20.56818    | 8.49630     | 23.73701    | 14.29418    | Detected    | Compromised | Detected    | Detected    |
| 2563 | A_24_P19175   | ZNF358       | Hs.133475 | zinc finger protein 358                                        | Homo sapiens zinc finger protein 358 (ZNF358), mRNA [NM_018083]                                                                                                                                                                | 2.50584 | up | 2.10776 | up | 944.63214   | 390.33994   | 1210.45280  | 506.39737   | Detected    | Detected    | Detected    | Detected    |
| 2564 | A_32_P169179  | MSX2P1       | Hs.381329 | msh homeobox 2 pseudogene 1                                    | Homo sapiens msh homeobox 2 pseudogene 1 (MSX2P1), non-coding RNA [NR_002307]                                                                                                                                                  | 2.50537 | up | 2.39453 | up | 417.28060   | 172.46013   | 365.86346   | 134.72974   | Detected    | Detected    | Detected    | Detected    |
| 2565 | A_23_P408353  | HLA-A        | Hs.181244 | major histocompatibility complex, class I, A                   | Homo sapiens major histocompatibility complex, class I A (HLA-A), mRNA [NM_002116]                                                                                                                                             | 2.50422 | up | 2.00895 | up | 34335.16000 | 14197.12400 | 34391.88000 | 15095.70200 | Detected    | Detected    | Detected    | Detected    |
| 2566 | A_33_P3590259 | CXCL14       | Hs.483444 | chemokine (C-X-C motif) ligand 14                              | Homo sapiens chemokine (C-X-C motif) ligand 14 (CXCL14), mRNA [NM_004887]                                                                                                                                                      | 2.50402 | up | 2.50450 | up | 910.33550   | 376.44080   | 696.19604   | 245.11865   | Detected    | Detected    | Detected    | Detected    |

|      |                |             |           |                                                                         |                                                                                                                                                                                                                                                                                                                  |         |    |         |    |             |            |             |            |             |             |             |             |
|------|----------------|-------------|-----------|-------------------------------------------------------------------------|------------------------------------------------------------------------------------------------------------------------------------------------------------------------------------------------------------------------------------------------------------------------------------------------------------------|---------|----|---------|----|-------------|------------|-------------|------------|-------------|-------------|-------------|-------------|
| 2567 | A_33_P3265394  | WDR74       | Hs.655372 | WD repeat domain 74                                                     | Homo sapiens cDNA FLJ78749 complete cds, highly similar to Homo sapiens WD repeat domain 74 (WDR74), mRNA [AK292330]                                                                                                                                                                                             | 2.50338 | up | 3.64188 | up | 163.39317   | 67.58331   | 141.28226   | 34.20799   | Detected    | Detected    | Detected    | Detected    |
| 2568 | A_33_P3329740  |             |           |                                                                         |                                                                                                                                                                                                                                                                                                                  | 2.50294 | up | 2.53521 | up | 21445.77500 | 8872.04700 | 19148.84600 | 6660.30760 | Detected    | Detected    | Detected    | Detected    |
| 2569 | A_23_P133236   | PCDHB14     | Hs.658497 | protocadherin beta 14                                                   | Homo sapiens protocadherin beta 14 (PCDHB14), mRNA [NM_018934]                                                                                                                                                                                                                                                   | 2.50238 | up | 3.17614 | up | 80.37313    | 33.25761   | 61.64074    | 17.11332   | Detected    | Detected    | Detected    | Detected    |
| 2570 | A_23_P42684    |             | Hs.272195 |                                                                         | cDNA FLJ20712 fis. clone HUV01027 [Source:UniProtKB/TrEMBL;Acc:G9NWP0] [ENST00000311067]                                                                                                                                                                                                                         | 2.50231 | up | 2.48846 | up | 46.57777    | 19.27396   | 19.86787    | 7.04022    | Detected    | Detected    | Detected    | Compromised |
| 2571 | A_23_P158053   | C9orf16     | Hs.522412 | chromosome 9 open reading frame 16                                      | Homo sapiens chromosome 9 open reading frame 16 (C9orf16), mRNA [NM_024112]                                                                                                                                                                                                                                      | 2.50177 | up | 2.23075 | up | 1194.02610  | 494.19592  | 1403.99050  | 554.98114  | Detected    | Detected    | Detected    | Detected    |
| 2572 | A_32_P72110    | PVR         | Hs.171844 | poliovirus receptor                                                     | Homo sapiens poliovirus receptor (PVR), transcript variant 1, mRNA [NM_006505]                                                                                                                                                                                                                                   | 2.50084 | up | 2.21669 | up | 53.30438    | 22.07043   | 78.25162    | 31.12825   | Detected    | Detected    | Detected    | Detected    |
| 2573 | A_23_P53081    | OSBPL5      | Hs.436166 | oxysterol binding protein-like 5                                        | Homo sapiens oxysterol binding protein-like 5 (OSBPL5), transcript variant 1, mRNA [NM_020896]                                                                                                                                                                                                                   | 2.49999 | up | 2.14301 | up | 17580.68600 | 7281.67800 | 18314.61100 | 7535.96600 | Detected    | Detected    | Detected    | Detected    |
| 2574 | A_23_P251916   | FAM82B      | Hs.145386 | family with sequence similarity 82, member B                            | Homo sapiens family with sequence similarity 82, member B (FAM82B), mRNA [NM_016033]                                                                                                                                                                                                                             | 2.49927 | up | 2.29503 | up | 8983.55000  | 3721.92820 | 8850.39700  | 3400.47300 | Detected    | Detected    | Detected    | Detected    |
| 2575 | A_33_P3335984  |             |           |                                                                         | Uncharacterized protein FLJ39653 [Source:UniProtKB/Swiss-Prot;Acc:Q8N8D0] [ENST00000440429]                                                                                                                                                                                                                      | 2.49872 | up | 2.25196 | up | 134.82810   | 55.87217   | 124.29179   | 48.66838   | Detected    | Detected    | Detected    | Detected    |
| 2576 | A_33_P3350726  | PPARG       | Hs.162646 | peroxisome proliferator-activated receptor gamma                        | Homo sapiens peroxisome proliferator-activated receptor gamma (PPARG), transcript variant 3, mRNA [NM_138711]                                                                                                                                                                                                    | 2.49758 | up | 2.45908 | up | 769.42706   | 318.99320  | 606.82440   | 217.59843  | Detected    | Detected    | Detected    | Detected    |
| 2577 | A_23_P24104    | PLAU        | Hs.77274  | plasminogen activator, urokinase                                        | Homo sapiens plasminogen activator, urokinase (PLAU), transcript variant 1, mRNA [NM_002658]                                                                                                                                                                                                                     | 2.49698 | up | 2.47550 | up | 7172.39840  | 2974.28520 | 6783.54300  | 2416.34740 | Detected    | Detected    | Detected    | Detected    |
| 2578 | A_23_P216689   | BRD3        | Hs.522472 | bromodomain containing 3                                                | Homo sapiens bromodomain containing 3 (BRD3), mRNA [NM_007371]                                                                                                                                                                                                                                                   | 2.49439 | up | 1.86543 | up | 689.19855   | 286.09677  | 1261.16800  | 596.15686  | Detected    | Detected    | Detected    | Detected    |
| 2579 | A_33_P3298440  | hCG_1986447 | Hs.646781 | hCG1986447                                                              | PREDICTED: Homo sapiens hCG1986447 (LOC729324), miscRNA [XR_041500]                                                                                                                                                                                                                                              | 2.49409 | up | 2.00091 | up | 45.69394    | 18.97054   | 24.90387    | 10.97501   | Detected    | Detected    | Detected    | Compromised |
| 2580 | A_23_P27606    | IL27RA      | Hs.132781 | interleukin 27 receptor, alpha                                          | Homo sapiens interleukin 27 receptor, alpha (IL27RA), mRNA [NM_004843]                                                                                                                                                                                                                                           | 2.49404 | up | 2.39949 | up | 653.52360   | 271.32578  | 627.74506   | 230.69022  | Detected    | Detected    | Detected    | Detected    |
| 2581 | A_23_P31945    | IL33        | Hs.348390 | interleukin 33                                                          | Homo sapiens interleukin 33 (IL33), mRNA [NM_033439]                                                                                                                                                                                                                                                             | 2.49348 | up | 2.51772 | up | 409.89960   | 170.21780  | 387.54675   | 135.73192  | Detected    | Detected    | Detected    | Detected    |
| 2582 | A_33_P32959565 | LEKR1       | Hs.478048 | leucine, glutamate and lysine rich 1                                    | Homo sapiens leucine, glutamate and lysine rich 1 (LEKR1), mRNA [NM_001004316]                                                                                                                                                                                                                                   | 2.49211 | up | 5.15428 | up | 7.97407     | 3.31318    | 16.51427    | 2.82525    | Compromised | Compromised | Detected    | Compromised |
| 2583 | A_33_P3394833  | C3orf72     | Hs.591303 | chromosome 3 open reading frame 72                                      | Homo sapiens chromosome 3 open reading frame 72 (C3orf72), mRNA [NM_01940061]                                                                                                                                                                                                                                    | 2.49194 | up | 2.32943 | up | 2294.50500  | 953.41925  | 1389.07340  | 525.82460  | Detected    | Detected    | Detected    | Detected    |
| 2584 | A_32_P195401   | FAM117B     | Hs.471130 | family with sequence similarity 117, member B                           | Homo sapiens family with sequence similarity 117, member B (FAM117B), mRNA [NM_173511]                                                                                                                                                                                                                           | 2.49088 | up | 2.27071 | up | 1418.30830  | 589.59045  | 1077.65160  | 418.48750  | Detected    | Detected    | Detected    | Detected    |
| 2585 | A_33_P3352877  | SPG20       | Hs.440414 | spastic paraplegia 20 (Troyer syndrome)                                 | Homo sapiens spastic paraplegia 20 (Troyer syndrome) (SPG20), transcript variant 1, mRNA [NM_015087]                                                                                                                                                                                                             | 2.49046 | up | 2.35052 | up | 648.40340   | 269.58730  | 411.50110   | 154.37320  | Detected    | Detected    | Detected    | Detected    |
| 2586 | A_23_P82351    | BBS9        | Hs.372360 | Bardet-Biedl syndrome 9                                                 | Homo sapiens Bardet-Biedl syndrome 9 (BBS9), transcript variant 2, mRNA [NM_198428]                                                                                                                                                                                                                              | 2.48982 | up | 2.51268 | up | 1628.68920  | 677.33580  | 1462.48580  | 513.23920  | Detected    | Detected    | Detected    | Detected    |
| 2587 | A_33_P3369371  | GPX3        | Hs.386793 | glutathione peroxidase 3 (plasma)                                       | Homo sapiens glutathione peroxidase 3 (plasma) (GPX3), mRNA [NM_002084]                                                                                                                                                                                                                                          | 2.48964 | up | 2.48071 | up | 85.25773    | 35.45927   | 58.32977    | 20.73385   | Detected    | Detected    | Detected    | Detected    |
| 2588 | A_24_P64100    | SLC25A37    | Hs.596025 | solute carrier family 25, member 37                                     | Homo sapiens FP15737 mRNA, complete cds. [AF495725]                                                                                                                                                                                                                                                              | 2.48903 | up | 2.66141 | up | 1194.87170  | 497.07680  | 1073.22690  | 355.58615  | Detected    | Detected    | Detected    | Detected    |
| 2589 | A_23_P86838    | SLC36A4     | Hs.148766 | solute carrier family 36 (proton/amino acid symporter), member 4        | Homo sapiens solute carrier family 36 (proton/amino acid symporter), member 4 (SLC36A4), mRNA [NM_152313]                                                                                                                                                                                                        | 2.48609 | up | 2.47155 | up | 3367.66550  | 1402.63810 | 3402.16600  | 1213.81410 | Detected    | Detected    | Detected    | Detected    |
| 2590 | A_33_P3327956  | ZNF605      | Hs.720299 | zinc finger protein 605                                                 | Homo sapiens zinc finger protein 605 (ZNF605), transcript variant 1, mRNA [NM_183238]                                                                                                                                                                                                                            | 2.48589 | up | 2.53138 | up | 1597.48350  | 665.40765  | 1029.25400  | 358.53485  | Detected    | Detected    | Detected    | Detected    |
| 2591 | A_33_P3267263  | RNU1-5      | Hs.623806 | RNA, U1 small nuclear 5                                                 | Homo sapiens RNA, U1 small nuclear 5 (RNU1-5), small nuclear RNA [NR_004400]                                                                                                                                                                                                                                     | 2.48304 | up | 2.95438 | up | 3608.08720  | 1504.62000 | 3732.75950  | 1114.11180 | Detected    | Detected    | Detected    | Detected    |
| 2592 | A_33_P3383561  |             | Hs.711755 |                                                                         | DNA-directed RNA polymerases I, II, and III subunit RPABC2 (RNA polymerases I, II, and III subunit ABC2)/DNA-directed RNA polymerase II subunit F/DNA-directed RNA polymerases I, II, and III 14.4 kDa polypeptide (RPABC14.4)/(RPB14.4)(RPB6)(RPC15) [Source:UniProtKB/Swiss-Prot;Acc:P61218] [ENST00000443002] | 2.48270 | up | 1.80394 | up | 15.19413    | 6.33702    | 5.42324     | 2.65096    | Detected    | Compromised | Compromised | Compromised |
| 2593 | A_23_P103672   | NES         | Hs.527971 | nestin                                                                  | Homo sapiens nestin (NES), mRNA [NM_006617]                                                                                                                                                                                                                                                                      | 2.48138 | up | 2.14347 | up | 3163.19920  | 1319.97500 | 3497.96630  | 1439.01300 | Detected    | Detected    | Detected    | Detected    |
| 2594 | A_23_P390116   | SPATA13     | Hs.595391 | spermatogenesis associated 13                                           | Homo sapiens spermatogenesis associated 13 (SPATA13), transcript variant 2, mRNA [NM_153023]                                                                                                                                                                                                                     | 2.48016 | up | 2.15703 | up | 425.47320   | 177.63371  | 308.29355   | 126.02992  | Detected    | Detected    | Detected    | Detected    |
| 2595 | A_23_P406448   | RAB9B       | Hs.522736 | RAB9B, member RAS oncogene family                                       | Homo sapiens RAB9B, member RAS oncogene family (RAB9B), mRNA [NM_016370]                                                                                                                                                                                                                                         | 2.47998 | up | 1.63310 | up | 14.06603    | 5.87295    | 20.41699    | 11.02412   | Detected    | Compromised | Detected    | Compromised |
| 2596 | A_33_P3352767  | MC1R        | Hs.513829 | melanocortin 1 receptor (alpha melanocyte stimulating hormone receptor) | Homo sapiens melanocortin 1 receptor (alpha melanocyte stimulating hormone receptor) (MC1R), mRNA [NM_002386]                                                                                                                                                                                                    | 2.47685 | up | 2.51510 | up | 6865.14840  | 2870.00660 | 5363.56700  | 1880.46280 | Detected    | Detected    | Detected    | Detected    |

|      |               |              |           |                                                                                  |                                                                                                                                                                                    |         |    |         |    |             |            |             |            |          |             |             |             |
|------|---------------|--------------|-----------|----------------------------------------------------------------------------------|------------------------------------------------------------------------------------------------------------------------------------------------------------------------------------|---------|----|---------|----|-------------|------------|-------------|------------|----------|-------------|-------------|-------------|
| 2597 | A_24_P481824  | DPY19L4      | Hs.567828 | dpy-19-like 4 (C. elegans)                                                       | Homo sapiens dpy-19-like 4 (C. elegans) (DPY19L4), mRNA [NM_181787]                                                                                                                | 2.47630 | up | 3.03521 | up | 596.10016   | 249.25774  | 308.51492   | 89.62986   | Detected | Detected    | Detected    | Detected    |
| 2598 | A_33_P3228499 |              |           |                                                                                  |                                                                                                                                                                                    | 2.47604 | up | 3.81798 | up | 32.73024    | 13.68750   | 25.74217    | 5.94535    | Detected | Compromised | Detected    | Compromised |
| 2599 | A_23_P35316   | ZNF695       | Hs.669893 | zinc finger protein 695                                                          | Homo sapiens zinc finger protein 695 (ZNF695), mRNA [NM_020394]                                                                                                                    | 2.47451 | up | 2.49478 | up | 26.60894    | 11.13454   | 18.38606    | 6.49864    | Detected | Compromised | Detected    | Compromised |
| 2600 | A_23_P97860   | LIPA         | Hs.643030 | lipase A, lysosomal acid, cholesterol esterase                                   | Homo sapiens lipase A, lysosomal acid, cholesterol esterase (LIPA), transcript variant 2, mRNA [NM_000235]                                                                         | 2.47299 | up | 2.50411 | up | 11096.04900 | 4645.99900 | 9387.96800  | 3305.85840 | Detected | Detected    | Detected    | Detected    |
| 2601 | A_24_P190541  | BRWD1        | Hs.654740 | bromodomain and WD repeat domain containing 1                                    | Homo sapiens bromodomain and WD repeat domain containing 1 (BRWD1), transcript variant 1, mRNA [NM_018963]                                                                         | 2.47244 | up | 2.92858 | up | 581.29224   | 243.44540  | 402.90714   | 121.31480  | Detected | Detected    | Detected    | Detected    |
| 2602 | A_23_P55873   | CC2D1A       | Hs.269592 | coiled-coil and C2 domain containing 1A                                          | Homo sapiens coiled-coil and C2 domain containing 1A (CC2D1A), mRNA [NM_017721]                                                                                                    | 2.47193 | up | 2.19577 | up | 1194.55030  | 500.38150  | 1146.67770  | 460.49026  | Detected | Detected    | Detected    | Detected    |
| 2603 | A_23_P413641  | PREX1        | Hs.153310 | phosphatidylinositol-3,4,5-trisphosphate-dependent Rac exchange factor 1         | Homo sapiens phosphatidylinositol-3,4,5-trisphosphate-dependent Rac exchange factor 1 (PREX1), mRNA [NM_020820]                                                                    | 2.47123 | up | 2.65809 | up | 1698.27860  | 711.58984  | 1520.15480  | 504.29385  | Detected | Detected    | Detected    | Detected    |
| 2604 | A_33_P3409077 | C6orf170     | Hs.121396 | chromosome 6 open reading frame 170                                              | Homo sapiens chromosome 6 open reading frame 170 (C6orf170), mRNA [NM_152730]                                                                                                      | 2.47100 | up | 4.90091 | up | 22.31720    | 9.35191    | 20.28304    | 3.64940    | Detected | Compromised | Detected    | Compromised |
| 2605 | A_23_P29836   | TMEM42       | Hs.646856 | transmembrane protein 42                                                         | Homo sapiens transmembrane protein 42 (TMEM42), mRNA [NM_144638]                                                                                                                   | 2.46947 | up | 2.40651 | up | 13661.94200 | 5728.52000 | 12193.45300 | 4467.91260 | Detected | Detected    | Detected    | Detected    |
| 2606 | A_33_P3256957 | LOC100128402 | Hs.689574 | hypothetical protein LOC100128402                                                | Homo sapiens cDNA FLJ42583 fis, clone BRACE300909, [AK124574]                                                                                                                      | 2.46942 | up | 1.72866 | up | 13.65084    | 5.72396    | 7.38090     | 3.76501    | Detected | Compromised | Compromised | Compromised |
| 2607 | A_23_P143935  | PIGZ         | Hs.518403 | phosphatidylinositol glycan anchor biosynthesis, class Z                         | Homo sapiens phosphatidylinositol glycan anchor biosynthesis, class Z (PIGZ), mRNA [NM_025163]                                                                                     | 2.46706 | up | 2.46548 | up | 5103.29050  | 2141.92260 | 4620.95700  | 1652.70960 | Detected | Detected    | Detected    | Detected    |
| 2608 | A_33_P3254660 |              | Hs.712007 |                                                                                  | Putative uncharacterized protein ENSP00000329674 [Source:UniProtKB/TrEMBL;Acc:B7WP L7] [ENST00000330805]                                                                           | 2.46646 | up | 2.55471 | up | 464.04898   | 194.81511  | 403.30150   | 139.20462  | Detected | Detected    | Detected    | Detected    |
| 2609 | A_23_P35916   | ATM          | Hs.367437 | ataxia telangiectasia mutated                                                    | Homo sapiens ataxia telangiectasia mutated (ATM), transcript variant 1, mRNA [NM_000051]                                                                                           | 2.46478 | up | 2.76791 | up | 84.30158    | 35.41534   | 68.13844    | 21.70727   | Detected | Detected    | Detected    | Detected    |
| 2610 | A_23_P151307  | RAPGEF3      | Hs.8578   | Rap guanine nucleotide exchange factor (GEF) 3                                   | Homo sapiens Rap guanine nucleotide exchange factor (GEF) 3 (RAPGEF3), transcript variant 2, mRNA [NM_006105]                                                                      | 2.46458 | up | 2.06198 | up | 96.41627    | 40.50797   | 76.64784    | 32.77796   | Detected | Detected    | Detected    | Detected    |
| 2611 | A_24_P242299  | ZRANB2       | Hs.194718 | zinc finger, RAN-binding domain containing 2                                     | Homo sapiens zinc finger, RAN-binding domain containing 2 (ZRANB2), transcript variant 2, mRNA [NM_005455]                                                                         | 2.46453 | up | 2.55111 | up | 8524.73800  | 3581.62450 | 7611.28700  | 2630.83720 | Detected | Detected    | Detected    | Detected    |
| 2612 | A_32_P36942   | C2orf60      | Hs.204619 | chromosome 2 open reading frame 60                                               | Homo sapiens chromosome 2 open reading frame 60 (C2orf60), transcript variant 1, mRNA [NM_001039693]                                                                               | 2.46372 | up | 2.09060 | up | 270.02230   | 113.48579  | 190.58890   | 80.38809   | Detected | Detected    | Detected    | Detected    |
| 2613 | A_23_P202773  | C11orf20     | Hs.97174  | chromosome 11 open reading frame 20                                              | Homo sapiens chromosome 11 open reading frame 20 (C11orf20), mRNA [NM_001039496]                                                                                                   | 2.46363 | up | 3.28913 | up | 598.18670   | 251.41676  | 583.90250   | 156.53996  | Detected | Detected    | Detected    | Detected    |
| 2614 | A_24_P32887   | BRD3         | Hs.522472 | bromodomain containing 3                                                         | Homo sapiens bromodomain containing 3 (BRD3), mRNA [NM_007371]                                                                                                                     | 2.46336 | up | 1.76015 | up | 527.41200   | 221.69505  | 704.65830   | 353.01645  | Detected | Detected    | Detected    | Detected    |
| 2615 | A_23_P208143  | ZNF397       | Hs.591061 | zinc finger protein 397                                                          | Homo sapiens zinc finger protein 397 (ZNF397), transcript variant 1, mRNA [NM_001135178]                                                                                           | 2.46335 | up | 2.88931 | up | 425.07626   | 178.67896  | 333.65924   | 101.82972  | Detected | Detected    | Detected    | Detected    |
| 2616 | A_23_P162918  | SERPINA3     | Hs.534293 | serpin peptidase inhibitor, clade A (alpha-1 antitrypsin, antitrypsin), member 3 | Homo sapiens serpin peptidase inhibitor, clade A (alpha-1 antitrypsin, antitrypsin), member 3 (SERPINA3), mRNA [NM_001085]                                                         | 2.46334 | up | 4.02014 | up | 130.63857   | 54.91352   | 79.91776    | 17.52944   | Detected | Detected    | Detected    | Detected    |
| 2617 | A_23_P135184  | RALGDS       | Hs.106185 | ral guanine nucleotide dissociation stimulator                                   | Homo sapiens ral guanine nucleotide dissociation stimulator (RALGDS), transcript variant 2, mRNA [NM_001042388]                                                                    | 2.46216 | up | 1.98372 | up | 5785.60800  | 2433.13720 | 3049.38300  | 1355.49570 | Detected | Detected    | Detected    | Detected    |
| 2618 | A_23_P123916  | LRSAM1       | Hs.495188 | leucine rich repeat and sterile alpha motif containing 1                         | Homo sapiens leucine rich repeat and sterile alpha motif containing 1 (LRSAM1), transcript variant 1, mRNA [NM_138361]                                                             | 2.45906 | up | 1.90436 | up | 192.53716   | 81.07355   | 169.83253   | 78.63876   | Detected | Detected    | Detected    | Detected    |
| 2619 | A_33_P3374504 |              |           |                                                                                  | Thioredoxin reductase 2, mitochondrial Precursor (EC 1.8.1.9)(Thioredoxin reductase TR3)(TR-beta)(Selenoprotein Z)(SeIZ) [Source:UniProtKB/Swiss-Prot;Acc:Q9NNW7] [ENST0000034363] | 2.45804 | up | 2.92765 | up | 362.18732   | 152.57301  | 504.50092   | 151.95255  | Detected | Detected    | Detected    | Detected    |
| 2620 | A_23_P404678  | RAB3D        | Hs.655274 | RAB3D, member RAS oncogene family                                                | Homo sapiens RAB3D, member RAS oncogene family (RAB3D), mRNA [NM_004283]                                                                                                           | 2.45746 | up | 3.06539 | up | 58.60295    | 24.69256   | 62.67073    | 18.02787   | Detected | Detected    | Detected    | Detected    |
| 2621 | A_24_P188164  | SCAND3       | Hs.176980 | SCAN domain containing 3                                                         | Homo sapiens SCAN domain containing 3 (SCAND3), mRNA [NM_052923]                                                                                                                   | 2.45727 | up | 1.69947 | up | 12.54010    | 5.28423    | 14.61694    | 7.58418    | Detected | Compromised | Detected    | Compromised |
| 2622 | A_32_P134209  | ACVR2B       | Hs.174273 | activin A receptor, type IIB                                                     | Homo sapiens activin A receptor, type IIB (ACVR2B), mRNA [NM_001106]                                                                                                               | 2.45659 | up | 2.71678 | up | 216.89792   | 91.42310   | 167.57951   | 54.39159   | Detected | Detected    | Detected    | Detected    |
| 2623 | A_24_P29117   | SLC26A1      | Hs.658244 | solute carrier family 26 (sulfate transporter), member 1                         | Homo sapiens solute carrier family 26 (sulfate transporter), member 1 (SLC26A1), transcript variant 2, mRNA [NM_134425]                                                            | 2.45653 | up | 2.69879 | up | 56.04364    | 23.62315   | 56.65553    | 18.51136   | Detected | Detected    | Detected    | Detected    |
| 2624 | A_23_P104471  | DUSP13       | Hs.720464 | dual specificity phosphatase 13                                                  | Homo sapiens dual specificity phosphatase 13 (DUSP13), transcript variant 1, mRNA [NM_001007271]                                                                                   | 2.45642 | up | 2.85434 | up | 25.30144    | 10.66538   | 15.89626    | 4.91083    | Detected | Compromised | Detected    | Compromised |
| 2625 | A_33_P3335840 | WDR33        | Hs.620490 | WD repeat domain 33                                                              | Homo sapiens WD repeat domain 33 (WDR33), transcript variant 3, mRNA [NM_001006823]                                                                                                | 2.45613 | up | 2.39204 | up | 191.69594   | 80.81540   | 136.66740   | 50.38047   | Detected | Detected    | Detected    | Detected    |



|      |               |               |           |                                                       |                                                                                                                                                                                         |         |  |    |         |    |             |            |             |            |          |             |          |             |
|------|---------------|---------------|-----------|-------------------------------------------------------|-----------------------------------------------------------------------------------------------------------------------------------------------------------------------------------------|---------|--|----|---------|----|-------------|------------|-------------|------------|----------|-------------|----------|-------------|
| 2626 | A_23_P351734  | NPHP4         | Hs.462348 | nephronophthisis 4                                    | Homo sapiens nephronophthisis 4 (NPHP4), mRNA [NM_015102]                                                                                                                               | 2.45528 |  | up | 2.80653 | up | 1529.90720  | 645.20526  | 800.98206   | 251.66286  | Detected | Detected    | Detected | Detected    |
| 2627 | A_33_P3291569 | LUC7L3        | Hs.130293 | LUC7-like 3 (S. cerevisiae)                           | Homo sapiens LUC7-like 3 (S. cerevisiae) (LUC7L3), transcript variant 1, mRNA [NM_016424]                                                                                               | 2.45350 |  | up | 2.57141 | up | 19385.17600 | 8181.20360 | 16366.78900 | 5612.52540 | Detected | Detected    | Detected | Detected    |
| 2628 | A_23_P218784  | DDX17         | Hs.528305 | DEAD (Asp-Glu-Ala-Asp) box polypeptide 17             | Homo sapiens DEAD (Asp-Glu-Ala-Asp) box polypeptide 17 (DDX17), transcript variant 1, mRNA [NM_003366]                                                                                  | 2.45282 |  | up | 3.17677 | up | 804.29440   | 339.53340  | 557.73096   | 154.81206  | Detected | Detected    | Detected | Detected    |
| 2629 | A_23_P161719  | CWF19L2       | Hs.212140 | CWF19-like 2, cell cycle control (S. pombe)           | Homo sapiens CWF19-like 2, cell cycle control (S. pombe) (CWF19L2), mRNA [NM_152434]                                                                                                    | 2.45205 |  | up | 2.58151 | up | 680.46790   | 287.35016  | 506.71915   | 173.08508  | Detected | Detected    | Detected | Detected    |
| 2630 | A_33_P3278205 | LOC100131102  | Hs.654812 | hypothetical protein LOC100131102                     | Homo sapiens cDNA, FLJ18231 [AK311189]                                                                                                                                                  | 2.45021 |  | up | 2.02218 | up | 27.80112    | 11.74876   | 22.84285    | 9.96082    | Detected | Compromised | Detected | Compromised |
| 2631 | A_24_P289471  | RNASET2       | Hs.529989 | ribonuclease T2                                       | Homo sapiens ribonuclease T2 (RNASET2), mRNA [NM_003730]                                                                                                                                | 2.44787 |  | up | 2.01349 | up | 1790.45240  | 757.36957  | 1830.77610  | 801.77295  | Detected | Detected    | Detected | Detected    |
| 2632 | A_23_P501805  | LIPT1         | Hs.719172 | lipoyltransferase 1                                   | Homo sapiens lipoyltransferase 1 (LIPT1), nuclear gene encoding mitochondrial protein, transcript variant 3, mRNA [NM_145197]                                                           | 2.44785 |  | up | 2.55559 | up | 465.80068   | 196.95291  | 378.26648   | 130.51842  | Detected | Detected    | Detected | Detected    |
| 2633 | A_32_P517749  | RPS6KA3       | Hs.445387 | ribosomal protein S6 kinase, 90kDa, polypeptide 3     | Homo sapiens ribosomal protein S6 kinase 90kDa, polypeptide 3 (RPS6KA3), mRNA [NM_004586]                                                                                               | 2.44717 |  | up | 2.30936 | up | 13783.41400 | 5832.10450 | 9224.87300  | 3522.36250 | Detected | Detected    | Detected | Detected    |
| 2634 | A_33_P3571901 | DKFZP586K1520 | Hs.516864 | DKFZP586K1520 protein                                 | Homo sapiens mRNA: cDNA DKFZP586K1520 (from clone DKFZp586K1520) [AL050153]                                                                                                             | 2.44699 |  | up | 2.28339 | up | 6149.94630  | 2602.38940 | 6742.88600  | 2603.93630 | Detected | Detected    | Detected | Detected    |
| 2635 | A_33_P3222689 | H2BFM         | Hs.376474 | H2B histone family, member M                          | Homo sapiens H2B histone family, member M (H2BFM), mRNA [NM_001164416]                                                                                                                  | 2.44545 |  | up | 2.12971 | up | 215.40335   | 91.20655   | 198.85130   | 82.33298   | Detected | Detected    | Detected | Detected    |
| 2636 | A_23_P154065  | TUBA4A        | Hs.75318  | tubulin, alpha 4a                                     | Homo sapiens tubulin, alpha 4a (TUBA4A), mRNA [NM_006000]                                                                                                                               | 2.44473 |  | up | 2.50268 | up | 14109.32000 | 5975.97360 | 15567.43700 | 5485.00050 | Detected | Detected    | Detected | Detected    |
| 2637 | A_33_P3245439 | CD40          | Hs.472860 | CD40 molecule, TNF receptor superfamily member 5      | Homo sapiens CD40 molecule, TNF receptor superfamily member 5 (CD40), transcript variant 1, mRNA [NM_001250]                                                                            | 2.44448 |  | up | 2.24828 | up | 223.80263   | 94.80080   | 281.99493   | 110.60050  | Detected | Detected    | Detected | Detected    |
| 2638 | A_23_P364837  | VPS13D        | Hs.439381 | vacuolar protein sorting 13 homolog D (S. cerevisiae) | Homo sapiens vacuolar protein sorting 13 homolog D (S. cerevisiae) (VPS13D), transcript variant 1, mRNA [NM_015378]                                                                     | 2.44395 |  | up | 2.07457 | up | 164.84680   | 69.84261   | 58.99336    | 25.07494   | Detected | Detected    | Detected | Detected    |
| 2639 | A_24_P50972   | GOLGA6L6      | Hs.125917 | golgi autoantigen, golgin subfamily a, 6-like 6       | Homo sapiens golgi autoantigen, golgin subfamily a, 6-like 6 (GOLGA6L6), mRNA [NM_001145004]                                                                                            | 2.44375 |  | up | 2.32685 | up | 329.81033   | 139.74641  | 196.00479   | 74.27855   | Detected | Detected    | Detected | Detected    |
| 2640 | A_23_P66608   | KAT2A         | Hs.463045 | K(lysine) acetyltransferase 2A                        | Homo sapiens K(lysine) acetyltransferase 2A (KAT2A), mRNA [NM_021078]                                                                                                                   | 2.44328 |  | up | 2.23717 | up | 7179.02500  | 3042.45870 | 6755.18600  | 2662.58620 | Detected | Detected    | Detected | Detected    |
| 2641 | A_23_P212339  | FYCO1         | Hs.200227 | FYVE and coiled-coil domain containing 1              | Homo sapiens FYVE and coiled-coil domain containing 1 (FYCO1), mRNA [NM_024513]                                                                                                         | 2.44244 |  | up | 2.41681 | up | 2703.36990  | 1146.07980 | 2130.31270  | 777.25970  | Detected | Detected    | Detected | Detected    |
| 2642 | A_24_P945113  | ACVRL1        | Hs.591026 | activin A receptor type II-like 1                     | Homo sapiens activin A receptor type II-like 1 (ACVRL1), transcript variant 1, mRNA [NM_000020]                                                                                         | 2.44070 |  | up | 2.22080 | up | 13233.51700 | 5614.27700 | 15768.31900 | 6260.98140 | Detected | Detected    | Detected | Detected    |
| 2643 | A_23_P363406  | ANGEL1        | Hs.497448 | angel homolog 1 (Drosophila)                          | Homo sapiens angel homolog 1 (Drosophila) (ANGEL1), mRNA [NM_015305]                                                                                                                    | 2.44047 |  | up | 2.39716 | up | 246.57306   | 104.61752  | 177.48225   | 65.28661   | Detected | Detected    | Detected | Detected    |
| 2644 | A_33_P3366221 | NTNG1         | Hs.657434 | netrin G1                                             | Homo sapiens netrin G1 (NTNG1), transcript variant 3, mRNA [NM_014917]                                                                                                                  | 2.43943 |  | up | 2.24886 | up | 671.97620   | 285.23227  | 582.32910   | 228.33453  | Detected | Detected    | Detected | Detected    |
| 2645 | A_23_P133133  | ALPK1         | Hs.652825 | alpha-kinase 1                                        | Homo sapiens alpha-kinase 1 (ALPK1), transcript variant 1, mRNA [NM_025144]                                                                                                             | 2.43898 |  | up | 2.55805 | up | 913.01610   | 387.61670  | 574.33080   | 197.97858  | Detected | Detected    | Detected | Detected    |
| 2646 | A_24_P918175  | LOC100128392  | Hs.607889 | hypothetical LOC100128392                             | PREDICTED: Homo sapiens hypothetical LOC100128392 (LOC100128392), mRNA [XM_001723572]                                                                                                   | 2.43891 |  | up | 2.12606 | up | 15.43492    | 6.55301    | 22.91605    | 9.50450    | Detected | Compromised | Detected | Compromised |
| 2647 | A_23_P102607  |               |           |                                                       | Chromodomain-helicase-DNA-binding protein 6 (CHD-6)(EC 3.6.1.-)ATP-dependent helicase CHD6(Radiation-induced gene B protein) [Source:UniProtKB/Swiss-Prot;Acc:Q8TD26] [ENST00000373222] | 2.43889 |  | up | 1.97702 | up | 40.64609    | 17.25676   | 31.60090    | 14.09466   | Detected | Compromised | Detected | Compromised |
| 2648 | A_23_P405873  | C9orf72       | Hs.493639 | chromosome 9 open reading frame 72                    | Homo sapiens chromosome 9 open reading frame 72 (C9orf72), transcript variant 2, mRNA [NM_145005]                                                                                       | 2.43869 |  | up | 2.29506 | up | 709.64185   | 301.31195  | 656.29170   | 252.15576  | Detected | Detected    | Detected | Detected    |
| 2649 | A_33_P3354539 | CHURC1        | Hs.325531 | churchill domain containing 1                         | Homo sapiens churchill domain containing 1 (CHURC1), mRNA [NM_145165]                                                                                                                   | 2.43808 |  | up | 2.58285 | up | 471.26663   | 200.14810  | 396.32178   | 135.30496  | Detected | Detected    | Detected | Detected    |
| 2650 | A_33_P3262854 |               |           |                                                       |                                                                                                                                                                                         | 2.43648 |  | up | 2.04065 | up | 101.17997   | 42.99965   | 57.20247    | 24.71791   | Detected | Detected    | Detected | Detected    |
| 2651 | A_23_P12680   | PSAP          | Hs.523004 | prosaposin                                            | Homo sapiens prosaposin (PSAP), transcript variant 2, mRNA [NM_001042465]                                                                                                               | 2.43645 |  | up | 2.30094 | up | 23059.81800 | 9800.14200 | 22953.10400 | 8796.32300 | Detected | Detected    | Detected | Detected    |
| 2652 | A_33_P3281695 | NLRP3         | Hs.159483 | NLR family, pyrin domain containing 3                 | Homo sapiens NLR family, pyrin domain containing 3 (NLRP3), transcript variant 1, mRNA [NM_004895]                                                                                      | 2.43601 |  | up | 2.18336 | up | 30.17836    | 12.82775   | 23.77553    | 9.60219    | Detected | Compromised | Detected | Compromised |
| 2653 | A_32_P207169  | C1orf133      | Hs.446946 | chromosome 1 open reading frame 133                   | Homo sapiens chromosome 1 open reading frame 133 (C1orf133), non-coding RNA [NR_024337]                                                                                                 | 2.43386 |  | up | 2.74918 | up | 2171.39700  | 923.79750  | 1887.82740  | 605.51373  | Detected | Detected    | Detected | Detected    |
| 2654 | A_33_P3221888 | LOC100131426  | Hs.546542 | hypothetical LOC100131426                             | PREDICTED: Homo sapiens hypothetical LOC100131426, transcript variant 1 (LOC100131426), mRNA [XM_001724346]                                                                             | 2.43335 |  | up | 1.11187 | up | 39.47174    | 16.79631   | 32.45859    | 25.74188   | Detected | Compromised | Detected | Detected    |

|      |               |              |           |                                                                           |                                                                                                                                         |         |    |         |    |              |             |              |             |          |             |             |             |
|------|---------------|--------------|-----------|---------------------------------------------------------------------------|-----------------------------------------------------------------------------------------------------------------------------------------|---------|----|---------|----|--------------|-------------|--------------|-------------|----------|-------------|-------------|-------------|
| 2655 | A_23_P152115  | NME3         | Hs.514065 | non-metastatic cells 3, protein expressed in                              | Homo sapiens non-metastatic cells 3, protein expressed in (NME3), mRNA [NM_002513]                                                      | 2.43266 | up | 2.47232 | up | 11441.48700  | 4870.05570  | 12757.36600  | 4550.10100  | Detected | Detected    | Detected    | Detected    |
| 2656 | A_33_P3247372 | LOC400927    | Hs.720223 | TPTE and PTEN homologous inositol lipid phosphatase pseudogene            | Homo sapiens cDNA FLJ42070 fis, clone SYNOV2012326 [AK124064]                                                                           | 2.43266 | up | 1.54489 | up | 35.83493     | 15.25312    | 14.30008     | 8.16221     | Detected | Detected    | Detected    | Compromised |
| 2657 | A_23_P210690  | TRIB3        | Hs.516826 | tribbles homolog 3 (Drosophila)                                           | Homo sapiens tribbles homolog 3 (Drosophila) (TRIB3), mRNA [NM_021156]                                                                  | 2.43175 | up | 2.21698 | up | 36691.48000  | 15623.50800 | 36604.41400  | 14559.21700 | Detected | Detected    | Detected    | Detected    |
| 2658 | A_33_P3358740 | OSBPL7       | Hs.463320 | oxysterol binding protein-like 7                                          | Homo sapiens oxysterol binding protein-like 7 (OSBPL7), transcript variant 1, mRNA [NM_145798]                                          | 2.43151 | up | 2.18676 | up | 2041.52950   | 869.38776   | 1520.55480   | 613.15094   | Detected | Detected    | Detected    | Detected    |
| 2659 | A_23_P408455  | SLC25A36     | Hs.144130 | solute carrier family 25, member 36                                       | Homo sapiens solute carrier family 25, member 36 (SLC25A36), transcript variant 1, mRNA [NM_001104647]                                  | 2.43129 | up | 2.72644 | up | 4647.45800   | 1979.29940  | 2823.44290   | 913.16340   | Detected | Detected    | Detected    | Detected    |
| 2660 | A_23_P154037  | AOX1         | Hs.406238 | aldehyde oxidase 1                                                        | Homo sapiens aldehyde oxidase 1 (AOX1), mRNA [NM_001159]                                                                                | 2.43011 | up | 2.29765 | up | 8622.15300   | 3673.86620  | 8402.61700   | 3224.74680  | Detected | Detected    | Detected    | Detected    |
| 2661 | A_24_P201125  | ZNF510       | Hs.75264  | zinc finger protein 510                                                   | Homo sapiens zinc finger protein 510 (ZNF510), mRNA [NM_014930]                                                                         | 2.43011 | up | 4.94606 | up | 33.06902     | 14.09059    | 15.03131     | 2.67980     | Detected | Compromised | Detected    | Compromised |
| 2662 | A_33_P3762913 | LOC100216546 | Hs.651341 | hypothetical LOC100216546                                                 | Homo sapiens cDNA FLJ44142 fis, clone THYMU2016523 [AK126130]                                                                           | 2.43006 | up | 2.71932 | up | 169.92517    | 72.40585    | 161.84886    | 52.48252    | Detected | Detected    | Detected    | Detected    |
| 2663 | A_24_P265856  | SENPF7       | Hs.529551 | SUMO1/sentrin specific peptidase 7                                        | Homo sapiens SUMO1/sentrin specific peptidase 7 (SENPF7), transcript variant 1, mRNA [NM_020654]                                        | 2.42969 | up | 2.55494 | up | 1720.99050   | 733.43250   | 890.90430    | 307.47903   | Detected | Detected    | Detected    | Detected    |
| 2664 | A_23_P120860  | NIPSNAP1     | Hs.173878 | nipsnap homolog 1 (C. elegans)                                            | Homo sapiens nipsnap homolog 1 (C. elegans) (NIPSNAP1), mRNA [NM_003634]                                                                | 2.42912 | up | 2.32726 | up | 1474.94010   | 628.72100   | 971.49370    | 368.09573   | Detected | Detected    | Detected    | Detected    |
| 2665 | A_23_P312150  | EDN2         | Hs.1407   | endothelin 2                                                              | Homo sapiens endothelin 2 (EDN2), mRNA [NM_001956]                                                                                      | 2.42870 | up | 2.13765 | up | 21.60421     | 9.21082     | 12.45530     | 5.13787     | Detected | Compromised | Compromised | Compromised |
| 2666 | A_23_P500886  | CLDN15       | Hs.38738  | claudin 15                                                                | Homo sapiens claudin 15 (CLDN15), mRNA [NM_014343]                                                                                      | 2.42837 | up | 2.35146 | up | 151.00240    | 64.38749    | 120.14507    | 45.05403    | Detected | Detected    | Detected    | Detected    |
| 2667 | A_23_P3221    | SQRDL        | Hs.511251 | sulfide quinone reductase-like (yeast)                                    | Homo sapiens sulfide quinone reductase-like (yeast) (SQRDL), nuclear gene encoding mitochondrial protein, mRNA [NM_021199]              | 2.42719 | up | 2.48900 | up | 121426.74000 | 51801.71500 | 116282.48400 | 41195.93800 | Detected | Detected    | Detected    | Detected    |
| 2668 | A_33_P3236319 | LOC100128869 | Hs.694468 | hypothetical LOC100128869                                                 | PREDICTED: Homo sapiens hypothetical LOC100128869 (LOC100128869), mRNA [XM_001719518]                                                   | 2.42717 | up | 1.05322 | up | 32.61886     | 13.91561    | 10.75863     | 9.00752     | Detected | Compromised | Compromised | Compromised |
| 2669 | A_23_P43079   | INTS8        | Hs.521693 | integrator complex subunit 8                                              | Homo sapiens integrator complex subunit 8 (INTS8), mRNA [NM_017864]                                                                     | 2.42699 | up | 2.62338 | up | 835.91170    | 356.63626   | 616.72200    | 207.29724   | Detected | Detected    | Detected    | Detected    |
| 2670 | A_23_P71037   | IL6          | Hs.654458 | interleukin 6 (interferon, beta 2)                                        | Homo sapiens interleukin 6 (interferon, beta 2) (IL6), mRNA [NM_000600]                                                                 | 2.42658 | up | 2.38097 | up | 2241.15360   | 956.33417   | 1901.17970   | 704.10190   | Detected | Detected    | Detected    | Detected    |
| 2671 | A_33_P3329108 | MTAP         | Hs.193268 | methylthioadenosine phosphorylase                                         | Homo sapiens methylthioadenosine phosphorylase (MTAP), mRNA [NM_002451]                                                                 | 2.42596 | up | 2.62456 | up | 2492.96120   | 1064.05770  | 1782.62020   | 598.91870   | Detected | Detected    | Detected    | Detected    |
| 2672 | A_32_P191895  |              | Hs.454036 |                                                                           | Homo sapiens cDNA clone IMAGE:4814292 [BC030617]                                                                                        | 2.42462 | up | 2.63505 | up | 1222.35560   | 522.01984   | 1449.46190   | 485.04736   | Detected | Detected    | Detected    | Detected    |
| 2673 | A_33_P3212555 | PROS1        | Hs.64016  | protein S (alpha)                                                         | Homo sapiens protein S (alpha) (PROS1), mRNA [NM_000313]                                                                                | 2.42414 | up | 2.77358 | up | 589.21760    | 251.68166   | 386.64860    | 122.92542   | Detected | Detected    | Detected    | Detected    |
| 2674 | A_33_P3288684 |              |           |                                                                           |                                                                                                                                         | 2.42370 | up | 4.13007 | up | 111.34014    | 47.56698    | 60.89954     | 13.00236    | Detected | Detected    | Detected    | Compromised |
| 2675 | A_32_P132860  | UNQ6494      |           | hypothetical LOC100129066                                                 | Homo sapiens hypothetical LOC100129066 (LOC100129066), non-coding RNA [NR_024280]                                                       | 2.42323 | up | 1.83558 | up | 18.13742     | 7.75024     | 6.78790      | 3.26083     | Detected | Compromised | Compromised | Compromised |
| 2676 | A_33_P3289251 |              |           |                                                                           |                                                                                                                                         | 2.42312 | up | 2.77085 | up | 3451.20830   | 1474.78500  | 1465.29880   | 466.31467   | Detected | Detected    | Detected    | Detected    |
| 2677 | A_24_P258846  | NFATC1       | Hs.534074 | nuclear factor of activated T-cells, cytoplasmic, calcineurin-dependent 1 | Homo sapiens nuclear factor of activated T-cells, cytoplasmic, calcineurin-dependent 1 (NFATC1), transcript variant 1, mRNA [NM_172390] | 2.42289 | up | 2.06483 | up | 968.79190    | 414.02853   | 1147.36010   | 489.98282   | Detected | Detected    | Detected    | Detected    |
| 2678 | A_23_P409168  | NBEAL2       | Hs.437043 | neurobeachin-like 2                                                       | Homo sapiens neurobeachin-like 2 (NBEAL2), mRNA [NM_015175]                                                                             | 2.42270 | up | 2.53234 | up | 198.09344    | 84.66494    | 149.45175    | 52.04078    | Detected | Detected    | Detected    | Detected    |
| 2679 | A_33_P3311668 | LOC100133598 | Hs.577721 | hypothetical protein LOC100133598                                         | PREDICTED: Homo sapiens hypothetical LOC100133598 (LOC100133598), mRNA [XM_001721691]                                                   | 2.42224 | up | 1.64181 | up | 19.60519     | 8.38085     | 10.79663     | 5.79869     | Detected | Compromised | Compromised | Compromised |
| 2680 | A_33_P3672482 | USP28        | Hs.503891 | ubiquitin specific peptidase 28                                           | Homo sapiens ubiquitin specific peptidase 28 (USP28), mRNA [NM_020886]                                                                  | 2.42205 | up | 1.50049 | up | 31.70076     | 13.55251    | 15.27198     | 8.97485     | Detected | Compromised | Detected    | Compromised |
| 2681 | A_33_P3273068 | ALX4         | Hs.436055 | ALX homeobox 4                                                            | Homeobox protein aristaless-like 4 [Source:UniProtKB/Swiss-Prot;Acc:Q9H161] [ENST00000329255]                                           | 2.42187 | up | 3.41335 | up | 29.70542     | 12.70040    | 33.75193     | 8.71934     | Detected | Compromised | Detected    | Compromised |
| 2682 | A_23_P157580  | SDCBP        | Hs.200804 | syndecan binding protein (syntenin)                                       | Homo sapiens syndecan binding protein (syntenin) (SDCBP), transcript variant 1, mRNA [NM_005625]                                        | 2.42172 | up | 2.38761 | up | 22007.96900  | 9409.99200  | 17086.66400  | 6310.43500  | Detected | Detected    | Detected    | Detected    |
| 2683 | A_33_P3405743 | CRYZ         | Hs.83114  | crystallin, zeta (quinone reductase)                                      | Homo sapiens crystallin, zeta (quinone reductase) (CRYZ), transcript variant 1, mRNA [NM_001130042]                                     | 2.41992 | up | 2.52390 | up | 2869.40330   | 1227.79110  | 2323.81670   | 811.88556   | Detected | Detected    | Detected    | Detected    |
| 2684 | A_23_P393686  | C8orf42      | Hs.289293 | chromosome 8 open reading frame 42                                        | Homo sapiens chromosome 8 open reading frame 42 (C8orf42), mRNA [NM_175075]                                                             | 2.41911 | up | 2.19821 | up | 60.67338     | 25.97021    | 57.02685     | 22.89663    | Detected | Detected    | Detected    | Detected    |
| 2685 | A_23_P350555  | TCP10L       | Hs.42034  | t-complex 10 (mouse)-like                                                 | Homo sapiens t-complex 10 (mouse)-like (TCP10L), mRNA [NM_144659]                                                                       | 2.41840 | up | 3.50402 | up | 361.97480    | 154.98264   | 269.50946    | 67.82232    | Detected | Detected    | Detected    | Detected    |
| 2686 | A_23_P79015   | SCN1B        | Hs.436646 | sodium channel, voltage-gated, type I, beta                               | Homo sapiens sodium channel, voltage-gated, type I, beta (SCN1B), transcript variant b, mRNA [NM_199037]                                | 2.41805 | up | 3.49664 | up | 67.54604     | 28.92458    | 55.52560     | 14.00258    | Detected | Detected    | Detected    | Compromised |
| 2687 | A_23_P259090  | NUDT12       | Hs.434289 | nudix (nucleoside diphosphate linked moiety X)-type motif 12              | Homo sapiens nudix (nucleoside diphosphate linked moiety X)-type motif 12 (NUDT12), mRNA [NM_031438]                                    | 2.41756 | up | 2.38522 | up | 416.37134    | 178.33493   | 300.85977    | 111.22462   | Detected | Detected    | Detected    | Detected    |

|      |               |              |           |                                                          |                                                                                                                                                                                        |         |    |         |    |             |             |             |             |          |             |          |             |
|------|---------------|--------------|-----------|----------------------------------------------------------|----------------------------------------------------------------------------------------------------------------------------------------------------------------------------------------|---------|----|---------|----|-------------|-------------|-------------|-------------|----------|-------------|----------|-------------|
| 2688 | A_33_P3588134 | PANX2        | Hs.440092 | pannexin 2                                               | Homo sapiens pannexin 2 (PANX2), transcript variant 1, mRNA [NM_052839]                                                                                                                | 2.41638 | up | 2.84495 | up | 124.87750   | 53.51217    | 98.97947    | 30.67860    | Detected | Detected    | Detected | Detected    |
| 2689 | A_24_P382253  | RPRD1A       | Hs.464912 | regulation of nuclear pre-mRNA domain containing 1A      | Homo sapiens regulation of nuclear pre-mRNA domain containing 1A (RPRD1A), mRNA [NM_018170]                                                                                            | 2.41610 | up | 2.25187 | up | 3233.75070  | 1385.87510  | 2306.38130  | 903.13635   | Detected | Detected    | Detected | Detected    |
| 2690 | A_23_P420196  | SOCS1        | Hs.506640 | suppressor of cytokine signaling 1                       | Homo sapiens suppressor of cytokine signaling 1 (SOCS1), mRNA [NM_003745]                                                                                                              | 2.41588 | up | 2.75806 | up | 578.10320   | 247.77815   | 487.96490   | 156.00934   | Detected | Detected    | Detected | Detected    |
| 2691 | A_24_P9883    | DKFZp761E198 | Hs.591957 | DKFZp761E198 protein                                     | Homo sapiens DKFZp761E198 protein (DKFZp761E198), mRNA [NM_138368]                                                                                                                     | 2.41575 | up | 1.98023 | up | 69.86681    | 29.94687    | 185.50381   | 82.60452    | Detected | Detected    | Detected | Detected    |
| 2692 | A_33_P3402211 |              | Hs.666398 |                                                          | RST27055 Athersys RAGE Library<br>Homo sapiens cDNA, mRNA sequence [BG207573]                                                                                                          | 2.41550 | up | 5.88720 | up | 29.81048    | 12.77897    | 17.10826    | 2.56249     | Detected | Compromised | Detected | Compromised |
| 2693 | A_23_P92517   | TTC29        | Hs.378893 | tetratricopeptide repeat domain 29                       | Homo sapiens tetratricopeptide repeat domain 29 (TTC29), mRNA [NM_031956]                                                                                                              | 2.41427 | up | 2.28223 | up | 34.42820    | 14.76599    | 35.82701    | 13.84257    | Detected | Compromised | Detected | Compromised |
| 2694 | A_32_P1171313 | C8orf83      | Hs.440643 | chromosome 8 open reading frame 83                       | Homo sapiens chromosome 8 open reading frame 83 (C8orf83), non-coding RNA [NR_015339]                                                                                                  | 2.41409 | up | 2.54452 | up | 1836.87610  | 787.87990   | 1397.76030  | 484.38730   | Detected | Detected    | Detected | Detected    |
| 2695 | A_23_P312610  |              | Hs.172847 |                                                          | DnaJ Homolog subfamily C member 4 (Multiple endocrine neoplasia type 1 candidate protein number 18)(DnaJ-like protein HSPF2) [Source:UniProtKB/Swiss-Prot;Acc:Q9NNZ3] [ENST0000355040] | 2.41386 | up | 2.33417 | up | 230.22108   | 98.75668    | 236.02367   | 89.16381    | Detected | Detected    | Detected | Detected    |
| 2696 | A_23_P157607  | INTS10       | Hs.512627 | integrator complex subunit 10                            | Homo sapiens integrator complex subunit 10 (INTS10), mRNA [NM_018142]                                                                                                                  | 2.41373 | up | 2.40329 | up | 13873.02200 | 5951.35100  | 13738.12300 | 5040.64200  | Detected | Detected    | Detected | Detected    |
| 2697 | A_33_P3379947 | HLA-B        | Hs.77961  | major histocompatibility complex, class I, B             | Homo sapiens major histocompatibility complex, class I, B (HLA-B), mRNA [NM_005514]                                                                                                    | 2.41367 | up | 2.25671 | up | 98676.94500 | 42332.19500 | 37149.52300 | 14515.84800 | Detected | Detected    | Detected | Detected    |
| 2698 | A_33_P3404879 | LPHN2        | Hs.24212  | latrophilin 2                                            | Homo sapiens latrophilin 2 (LPHN2), mRNA [NM_012302]                                                                                                                                   | 2.41098 | up | 2.35147 | up | 68.58657    | 29.44773    | 61.18812    | 22.94526    | Detected | Detected    | Detected | Detected    |
| 2699 | A_23_P11859   | HSD17B7      | Hs.492925 | hydroxysteroid (17-beta) dehydrogenase 7                 | Homo sapiens hydroxysteroid (17-beta) dehydrogenase 7 (HSD17B7), mRNA [NM_016371]                                                                                                      | 2.40984 | up | 2.57902 | up | 303.81080   | 130.54123   | 229.04300   | 78.31182    | Detected | Detected    | Detected | Detected    |
| 2700 | A_33_P3267330 | HAR1B        |           | highly accelerated region 1B (non-protein coding)        | Homo sapiens highly accelerated region 1B (non-protein coding) (HAR1B), non-coding RNA [NR_003245]                                                                                     | 2.40977 | up | 2.41401 | up | 35.58195    | 15.28928    | 42.57474    | 15.55173    | Detected | Compromised | Detected | Detected    |
| 2701 | A_23_P62881   | SGIP1        | Hs.132121 | SH3-domain GRB2-like (endophilin) interacting protein 1  | Homo sapiens SH3-domain GRB2-like (endophilin) interacting protein 1 (SGIP1), mRNA [NM_032291]                                                                                         | 2.40973 | up | 2.26348 | up | 195.72934   | 84.10475    | 152.03152   | 59.22747    | Detected | Detected    | Detected | Detected    |
| 2702 | A_32_P33083   | VCX2         | Hs.279737 | variable charge, X-linked 2                              | Homo sapiens variable charge, X-linked 2 (VCX2), mRNA [NM_016378]                                                                                                                      | 2.40930 | up | 3.97093 | up | 24.56661    | 10.55813    | 39.36513    | 8.74149     | Detected | Compromised | Detected | Compromised |
| 2703 | A_33_P3286724 | PLD2         | Hs.104519 | phospholipase D2                                         | Homo sapiens phospholipase D2 (PLD2), mRNA [NM_002663]                                                                                                                                 | 2.40848 | up | 2.22629 | up | 12001.40500 | 5159.67000  | 10477.38400 | 4156.60700  | Detected | Detected    | Detected | Detected    |
| 2704 | A_33_P3236642 | MIA3         | Hs.118474 | melanoma inhibitory activity family, member 3            | Homo sapiens melanoma inhibitory activity family, member 3 (MIA3), mRNA [NM_198551]                                                                                                    | 2.40801 | up | 2.28993 | up | 112.97820   | 48.58141    | 75.88051    | 29.21951    | Detected | Detected    | Detected | Detected    |
| 2705 | A_33_P3308749 | LAMA4        | Hs.654572 | laminin, alpha 4                                         | Homo sapiens laminin, alpha 4 (LAMA4), transcript variant 3, mRNA [NM_001105207]                                                                                                       | 2.40762 | up | 3.01426 | up | 1733.11010  | 745.36900   | 1711.12040  | 500.57040   | Detected | Detected    | Detected | Detected    |
| 2706 | A_33_P3422659 | GDAP1        | Hs.168950 | ganglioside-induced differentiation-associated protein 1 | Homo sapiens ganglioside-induced differentiation-associated protein 1 (GDAP1), transcript variant 1, mRNA [NM_018972]                                                                  | 2.40747 | up | 2.87999 | up | 75.48864    | 32.45929    | 39.01326    | 11.94502    | Detected | Detected    | Detected | Compromised |
| 2707 | A_24_P36097   | RPAIN        | Hs.462086 | RPA interacting protein                                  | Homo sapiens RPA interacting protein (RPAIN), transcript variant 5, mRNA [NM_001160266]                                                                                                | 2.40664 | up | 2.50752 | up | 3953.25630  | 1700.89640  | 3774.77640  | 1327.43000  | Detected | Detected    | Detected | Detected    |
| 2708 | A_23_P168669  | CROT         | Hs.125039 | carnitine O-octanoyltransferase                          | Homo sapiens carnitine O-octanoyltransferase (CROT), transcript variant 2, mRNA [NM_021151]                                                                                            | 2.40663 | up | 2.12521 | up | 120.67450   | 51.92051    | 94.46150    | 39.19382    | Detected | Detected    | Detected | Detected    |
| 2709 | A_23_P149775  | ARHGAP12     | Hs.499264 | Rho GTPase activating protein 12                         | Homo sapiens Rho GTPase activating protein 12 (ARHGAP12), mRNA [NM_018287]                                                                                                             | 2.40601 | up | 2.33183 | up | 14432.27200 | 6211.11470  | 10000.79100 | 3781.84450  | Detected | Detected    | Detected | Detected    |
| 2710 | A_33_P3763846 | MAPK12       | Hs.432642 | mitogen-activated protein kinase 12                      | Homo sapiens mitogen-activated protein kinase 12 (MAPK12), mRNA [NM_002969]                                                                                                            | 2.40546 | up | 2.05959 | up | 530.30560   | 228.27643   | 475.09170   | 203.40488   | Detected | Detected    | Detected | Detected    |
| 2711 | A_23_P255714  | IFT74        | Hs.145402 | intraflagellar transport 74 homolog (Chlamydomonas)      | Homo sapiens intraflagellar transport 74 homolog (Chlamydomonas) (IFT74), transcript variant 1, mRNA [NM_025103]                                                                       | 2.40515 | up | 2.48426 | up | 1169.65310  | 503.55734   | 774.35040   | 274.85605   | Detected | Detected    | Detected | Detected    |
| 2712 | A_23_P148015  | AXIN2        | Hs.156527 | axin 2                                                   | Homo sapiens axin 2 (AXIN2), mRNA [NM_004655]                                                                                                                                          | 2.40506 | up | 2.22919 | up | 599.95130   | 258.29920   | 472.59308   | 186.94180   | Detected | Detected    | Detected | Detected    |
| 2713 | A_33_P3299170 | LUC7L        | Hs.16803  | LUC7-like (S. cerevisiae)                                | Homo sapiens LUC7-like (S. cerevisiae) (LUC7L), transcript variant 2, mRNA [NM_201412]                                                                                                 | 2.40462 | up | 2.25859 | up | 7433.45170  | 3200.94120  | 7307.82300  | 2853.09400  | Detected | Detected    | Detected | Detected    |
| 2714 | A_23_P96383   | SRPX         | Hs.15154  | sushi-repeat-containing protein, X-linked                | Homo sapiens sushi-repeat-containing protein, X-linked (SRPX), mRNA [NM_006307]                                                                                                        | 2.40441 | up | 2.12604 | up | 61888.15000 | 26652.09800 | 41139.55000 | 17062.96000 | Detected | Detected    | Detected | Detected    |
| 2715 | A_33_P3378126 | FBXO32       | Hs.403933 | F-box protein 32                                         | Homo sapiens F-box protein 32 (FBXO32), transcript variant 1, mRNA [NM_058229]                                                                                                         | 2.40298 | up | 2.46657 | up | 14752.09100 | 6356.78170  | 10623.82200 | 3797.98850  | Detected | Detected    | Detected | Detected    |
| 2716 | A_23_P363778  | FRZB         | Hs.720164 | frizzled-related protein                                 | Homo sapiens frizzled-related protein (FRZB), mRNA [NM_001463]                                                                                                                         | 2.40260 | up | 2.01971 | up | 98.89978    | 42.62336    | 72.66962    | 31.72701    | Detected | Detected    | Detected | Detected    |
| 2717 | A_33_P3250953 | SLC35B4      | Hs.490181 | solute carrier family 35, member B4                      | Homo sapiens solute carrier family 35, member B4 (SLC35B4), mRNA [NM_032826]                                                                                                           | 2.40233 | up | 2.52868 | up | 2078.29660  | 895.79510   | 1360.52200  | 474.43580   | Detected | Detected    | Detected | Detected    |
| 2718 | A_33_P3386870 |              |           |                                                          |                                                                                                                                                                                        | 2.40187 | up | 2.37394 | up | 62.58938    | 26.98262    | 64.88757    | 24.10220    | Detected | Detected    | Detected | Detected    |

|      |               |              |           |                                                                       |                                                                                                                                              |         |    |         |    |            |            |             |            |          |             |             |             |
|------|---------------|--------------|-----------|-----------------------------------------------------------------------|----------------------------------------------------------------------------------------------------------------------------------------------|---------|----|---------|----|------------|------------|-------------|------------|----------|-------------|-------------|-------------|
| 2719 | A_23_P257176  | SLC4A9       | Hs.550313 | solute carrier family 4, sodium bicarbonate cotransporter, member 9   | Homo sapiens solute carrier family 4, sodium bicarbonate cotransporter, member 9 (SLC4A9), mRNA [NM_031467]                                  | 2.40123 | up | 2.70136 | up | 31.91404   | 13.76201   | 9.74067     | 3.17960    | Detected | Compromised | Compromised | Compromised |
| 2720 | A_24_P286935  | ARL3         | Hs.182215 | ADP-ribosylation factor-like 3                                        | Homo sapiens ADP-ribosylation factor-like 3 (ARL3), mRNA [NM_004311]                                                                         | 2.39942 | up | 2.42293 | up | 565.07880  | 243.85716  | 517.30304   | 188.26495  | Detected | Detected    | Detected    | Detected    |
| 2721 | A_23_P15394   | CD68         | Hs.647419 | CD68 molecule                                                         | Homo sapiens CD68 molecule (CD68), transcript variant 1, mRNA [NM_001251]                                                                    | 2.39864 | up | 2.09405 | up | 8877.93100 | 3832.47680 | 10008.60800 | 4214.55200 | Detected | Detected    | Detected    | Detected    |
| 2722 | A_24_P331830  | RP1-210I8.1  | Hs.368823 | kazrin                                                                | Homo sapiens kazrin (KIAA1026), transcript variant A, mRNA [NM_015209]                                                                       | 2.39808 | up | 1.62480 | up | 86.75578   | 37.46002   | 86.24970    | 46.80832   | Detected | Detected    | Detected    | Detected    |
| 2723 | A_24_P225878  | KIF9         | Hs.373947 | kinesin family member 9                                               | Homo sapiens kinesin family member 9 (KIF9), transcript variant 1, mRNA [NM_022342]                                                          | 2.39721 | up | 3.46715 | up | 62.38912   | 26.94854   | 48.96149    | 12.45222   | Detected | Detected    | Detected    | Compromised |
| 2724 | A_23_P64888   | TAS2R10      | Hs.533756 | taste receptor, type 2, member 10                                     | Homo sapiens taste receptor, type 2, member 10 (TAS2R10), mRNA [NM_023921]                                                                   | 2.39703 | up | 2.40093 | up | 80.36944   | 34.71766   | 70.04536    | 25.72558   | Detected | Detected    | Detected    | Detected    |
| 2725 | A_33_P3350583 | FAM122C      | Hs.269127 | family with sequence similarity 122C                                  | Homo sapiens family with sequence similarity 122C (FAM122C), mRNA [NM_138819]                                                                | 2.39663 | up | 2.41786 | up | 38.38320   | 16.58336   | 37.32691    | 13.61307   | Detected | Compromised | Detected    | Compromised |
| 2726 | A_23_P10442   | OSBPL1A      | Hs.370725 | oxysterol binding protein-like 1A                                     | Homo sapiens oxysterol binding protein-like 1A (OSBPL1A), transcript variant OSBPL1B, mRNA [NM_080597]                                       | 2.39428 | up | 2.32694 | up | 2378.80370 | 1028.76560 | 2031.50440  | 769.83510  | Detected | Detected    | Detected    | Detected    |
| 2727 | A_23_P9056    | RB1CC1       | Hs.196102 | RB1-inducible coiled-coil 1                                           | Homo sapiens RB1-inducible coiled-coil 1 (RB1CC1), transcript variant 1, mRNA [NM_014781]                                                    | 2.39420 | up | 2.39906 | up | 6077.21600 | 2628.31500 | 5175.00730  | 1902.11120 | Detected | Detected    | Detected    | Detected    |
| 2728 | A_33_P3210223 |              |           |                                                                       | Zinc finger OCH domain-containing protein 6 [Source:UniProtKB/Swiss-Prot;Acc:Q5VYS8][ENST00000375948]                                        | 2.39349 | up | 1.35296 | up | 16.08959   | 6.95193    | 11.13752    | 7.25885    | Detected | Compromised | Compromised | Compromised |
| 2729 | A_24_P83787   | DISC1        | Hs.13318  | disrupted in schizophrenia 1                                          | Homo sapiens disrupted in schizophrenia 1 (DISC1), transcript variant S, mRNA [NM_001012959]                                                 | 2.39314 | up | 4.16591 | up | 15.52889   | 6.71902    | 15.97240    | 3.38085    | Detected | Compromised | Compromised | Compromised |
| 2730 | A_23_P122563  | PFND6        | Hs.446374 | prefoldin subunit 6                                                   | Homo sapiens prefoldin subunit 6 (PFND6), mRNA [NM_014260]                                                                                   | 2.39083 | up | 1.49289 | up | 3595.97000 | 1557.39730 | 5077.81050  | 2999.26270 | Detected | Detected    | Detected    | Detected    |
| 2731 | A_24_P139943  | HS1BP3       | Hs.531785 | HCLS1 binding protein 3                                               | Homo sapiens HCLS1 binding protein 3 (HS1BP3), mRNA [NM_022460]                                                                              | 2.39081 | up | 2.11785 | up | 3083.93600 | 1335.65110 | 3866.98410  | 1610.06120 | Detected | Detected    | Detected    | Detected    |
| 2732 | A_33_P3309924 | HDAC2        | Hs.3352   | histone deacetylase 2                                                 | Homo sapiens histone deacetylase 2 (HDAC2), mRNA [NM_001527]                                                                                 | 2.38688 | up | 2.46723 | up | 103.30002  | 44.81296   | 89.82162    | 32.10235   | Detected | Detected    | Detected    | Detected    |
| 2733 | A_23_P107322  | CORO6        | Hs.143046 | coronin 6                                                             | Homo sapiens coronin 6 (CORO6), mRNA [NM_032854]                                                                                             | 2.38682 | up | 2.60529 | up | 1165.93920 | 505.81223  | 827.40485   | 280.04460  | Detected | Detected    | Detected    | Detected    |
| 2734 | A_24_P13475   | SPATA13      | Hs.595391 | spermatogenesis associated 13                                         | Homo sapiens spermatogenesis associated 13 (SPATA13), transcript variant 1, mRNA [NM_001166271]                                              | 2.38589 | up | 2.14016 | up | 367.62497  | 159.54680  | 343.94590   | 141.71303  | Detected | Detected    | Detected    | Detected    |
| 2735 | A_32_P198303  | DNAJC24      | Hs.718544 | DnaJ (Hsp40) homolog, subfamily C, member 24                          | Homo sapiens DnaJ (Hsp40) homolog, subfamily C, member 24 (DNAJC24), mRNA [NM_181706]                                                        | 2.38485 | up | 2.48930 | up | 1077.84830 | 467.98220  | 617.44604   | 218.71924  | Detected | Detected    | Detected    | Detected    |
| 2736 | A_23_P139998  | UBAC2        | Hs.508545 | UBA domain containing 2                                               | Homo sapiens UBA domain containing 2 (UBAC2), transcript variant 2, mRNA [NM_177967]                                                         | 2.38452 | up | 2.21028 | up | 4184.50100 | 1817.08680 | 3298.42380  | 1315.90300 | Detected | Detected    | Detected    | Detected    |
| 2737 | A_33_P3276153 | LOC645752    | Hs.574257 | golgi autoantigen, golgin subfamily a, 6 pseudogene                   | Homo sapiens golgi autoantigen, golgin subfamily a, 6 pseudogene (LOC645752), non-coding RNA [NR_027024]                                     | 2.38435 | up | 2.50997 | up | 213.43448  | 92.68890   | 157.38075   | 55.29020   | Detected | Detected    | Detected    | Detected    |
| 2738 | A_23_P141680  | BCAS3        | Hs.655028 | breast carcinoma amplified sequence 3                                 | Homo sapiens breast carcinoma amplified sequence 3 (BCAS3), transcript variant 2, mRNA [NM_017679]                                           | 2.38362 | up | 2.03965 | up | 278.07153  | 120.79601  | 203.22055   | 87.85716   | Detected | Detected    | Detected    | Detected    |
| 2739 | A_33_P3288023 | NCKIPSD      | Hs.655006 | NCK interacting protein with SH3 domain                               | Homo sapiens NCK interacting protein with SH3 domain (NCKIPSD), transcript variant 2, mRNA [NM_184231]                                       | 2.38350 | up | 2.29745 | up | 333.54526  | 144.90123  | 350.58466   | 134.55907  | Detected | Detected    | Detected    | Detected    |
| 2740 | A_33_P3221384 |              |           |                                                                       |                                                                                                                                              | 2.38325 | up | 1.11395 | up | 218.55946  | 94.95828   | 209.27245   | 165.65890  | Detected | Detected    | Detected    | Detected    |
| 2741 | A_23_P215997  | CYP11B2      | Hs.632054 | cytochrome P450, family 11, subfamily B, polypeptide 2                | Homo sapiens cytochrome P450, family 11, subfamily B, polypeptide 2 (CYP11B2), nuclear gene encoding mitochondrial protein, mRNA [NM_000498] | 2.38290 | up | 2.31708 | up | 12.45421   | 5.41181    | 18.82797    | 7.16521    | Detected | Compromised | Detected    | Compromised |
| 2742 | A_33_P3394972 | OSBPL5       | Hs.436166 | oxysterol binding protein-like 5                                      | Homo sapiens oxysterol binding protein-like 5 (OSBPL5), transcript variant 1, mRNA [NM_020896]                                               | 2.38249 | up | 2.58999 | up | 156.49019  | 68.01246   | 140.49767   | 47.83389   | Detected | Detected    | Detected    | Detected    |
| 2743 | A_32_P104746  | ZFYVE28      | Hs.292056 | zinc finger, FYVE domain containing 28                                | Homo sapiens zinc finger, FYVE domain containing 28 (ZFYVE28), mRNA [NM_020972]                                                              | 2.38105 | up | 2.43791 | up | 491.07004  | 213.55408  | 471.85046   | 170.66832  | Detected | Detected    | Detected    | Detected    |
| 2744 | A_24_P944458  | INSIG2       | Hs.7089   | insulin induced gene 2                                                | Homo sapiens insulin induced gene 2 (INSIG2), mRNA [NM_016133]                                                                               | 2.38013 | up | 2.43528 | up | 911.71040  | 396.63315  | 643.32623   | 232.94212  | Detected | Detected    | Detected    | Detected    |
| 2745 | A_23_P43557   | DENND1A      | Hs.568340 | DENN/MADD domain containing 1A                                        | Homo sapiens DENN/MADD domain containing 1A (DENND1A), transcript variant 2, mRNA [NM_024820]                                                | 2.37983 | up | 2.25501 | up | 665.66370  | 289.62885  | 494.00290   | 193.17285  | Detected | Detected    | Detected    | Detected    |
| 2746 | A_23_P420256  | C2orf43      | Hs.187823 | chromosome 2 open reading frame 43                                    | Homo sapiens chromosome 2 open reading frame 43 (C2orf43), mRNA [NM_021925]                                                                  | 2.37696 | up | 2.15653 | up | 868.80460  | 378.47183  | 775.47220   | 317.08510  | Detected | Detected    | Detected    | Detected    |
| 2747 | A_33_P3221916 | LOC100130138 | Hs.560906 | hypothetical LOC100130138                                             | PREDICTED: Homo sapiens hypothetical LOC100130138 (LOC100130138), mRNA [XM_001725911]                                                        | 2.37579 | up | 2.00054 | up | 12.57204   | 5.47938    | 5.62326     | 2.47860    | Detected | Compromised | Compromised | Compromised |
| 2748 | A_33_P3277110 | SLC5A3       | Hs.302742 | solute carrier family 5 (sodium/myo-inositol cotransporter), member 3 | Homo sapiens solute carrier family 5 (sodium/myo-inositol cotransporter), member 3 (SLC5A3), mRNA [NM_006933]                                | 2.37570 | up | 2.70954 | up | 3635.91820 | 1584.72970 | 2275.12870  | 740.41650  | Detected | Detected    | Detected    | Detected    |

|      |               |           |           |                                                                                                                                                            |                                                                                                                                                                                     |         |    |         |    |             |             |             |             |          |             |             |             |
|------|---------------|-----------|-----------|------------------------------------------------------------------------------------------------------------------------------------------------------------|-------------------------------------------------------------------------------------------------------------------------------------------------------------------------------------|---------|----|---------|----|-------------|-------------|-------------|-------------|----------|-------------|-------------|-------------|
| 2749 | A_23_P46017   | COBL2     | Hs.481898 | cysteine conjugate-beta lyase 2                                                                                                                            | Homo sapiens cysteine conjugate-beta lyase 2 (COBL2), transcript variant 1, mRNA [NM_001008661]                                                                                     | 2.37455 | up | 2.50477 | up | 2405.18750  | 1048.81870  | 2817.98320  | 992.05490   | Detected | Detected    | Detected    | Detected    |
| 2750 | A_33_P3309506 | SEBOX     | Hs.2257   | SEBOX homeobox                                                                                                                                             | Homo sapiens SEBOX homeobox (SEBOX), transcript variant 2, mRNA [NM_001083896]                                                                                                      | 2.37368 | up | 1.24215 | up | 69.18485    | 30.18020    | 11.95461    | 8.48648     | Detected | Detected    | Compromised | Compromised |
| 2751 | A_33_P3227551 |           |           |                                                                                                                                                            |                                                                                                                                                                                     | 2.37285 | up | 1.03706 | up | 13.10493    | 5.71870     | 10.40672    | 8.84863     | Detected | Compromised | Compromised | Compromised |
| 2752 | A_32_P206104  |           |           |                                                                                                                                                            |                                                                                                                                                                                     | 2.37249 | up | 1.57268 | up | 17.51113    | 7.64262     | 15.11050    | 8.47235     | Detected | Compromised | Detected    | Compromised |
| 2753 | A_23_P9883    | NLRP3     | Hs.159483 | NLR family, pyrin domain containing 3                                                                                                                      | Homo sapiens NLR family, pyrin domain containing 3 (NLRP3), transcript variant 3, mRNA [NM_001079821]                                                                               | 2.37151 | up | 2.49304 | up | 133.15118   | 58.13710    | 97.48431    | 34.48034    | Detected | Detected    | Detected    | Detected    |
| 2754 | A_23_P118722  | ASGR1     | Hs.12056  | asialoglycoprotein receptor 1                                                                                                                              | Homo sapiens asialoglycoprotein receptor 1 (ASGR1), mRNA [NM_001671]                                                                                                                | 2.36913 | up | 2.32276 | up | 1028.25290  | 449.41156   | 843.52520   | 320.22787   | Detected | Detected    | Detected    | Detected    |
| 2755 | A_23_P349676  | FBXO41    | Hs.23158  | F-box protein 41                                                                                                                                           | Homo sapiens F-box protein 41 (FBXO41), mRNA [NM_001080410]                                                                                                                         | 2.36878 | up | 2.42610 | up | 1214.21460  | 530.76680   | 800.96136   | 291.11700   | Detected | Detected    | Detected    | Detected    |
| 2756 | A_33_P3372727 | SEMA5A    | Hs.27621  | sema domain, seven thrombospondin repeats (type 1 and type 1-like), transmembrane domain (TM) and short cytoplasmic domain, (semaphorin) 5A (SEMA5A), mRNA | Homo sapiens sema domain, seven thrombospondin repeats (type 1 and type 1-like), transmembrane domain (TM) and short cytoplasmic domain, (semaphorin) 5A (SEMA5A), mRNA [NM_003966] | 2.36788 | up | 2.06385 | up | 30039.98800 | 13136.32800 | 25220.04100 | 10775.39100 | Detected | Detected    | Detected    | Detected    |
| 2757 | A_23_P90523   | OCEL1     | Hs.422676 | occludin/ELL domain containing 1                                                                                                                           | Homo sapiens occludin/ELL domain containing 1 (OCEL1), mRNA [NM_024578]                                                                                                             | 2.36610 | up | 2.41639 | up | 1199.88510  | 525.09796   | 1433.88720  | 523.25525   | Detected | Detected    | Detected    | Detected    |
| 2758 | A_24_P247732  | SLC5A6    | Hs.435735 | solute carrier family 5 (sodium-dependent vitamin transporter), member 6                                                                                   | Homo sapiens solute carrier family 5 (sodium-dependent vitamin transporter), member 6 (SLC5A6), transcript variant 1, mRNA [NM_021095]                                              | 2.36513 | up | 1.69957 | up | 11.55097    | 5.05704     | 15.24553    | 7.90988     | Detected | Compromised | Detected    | Compromised |
| 2759 | A_23_P151791  | LTB4R     | Hs.567248 | leukotriene B4 receptor                                                                                                                                    | Homo sapiens leukotriene B4 receptor (LTB4R), transcript variant 1, mRNA [NM_181857]                                                                                                | 2.36405 | up | 2.13524 | up | 326.11703   | 142.83989   | 221.70648   | 91.55808    | Detected | Detected    | Detected    | Detected    |
| 2760 | A_23_P301328  |           |           |                                                                                                                                                            | Pyridoxal kinase (EC 2.1.3.35)(Pyridoxine kinase) [Source:UniProtKB/Swiss-Prot;Acc:O00764] [ENST00000327574]                                                                        | 2.36396 | up | 1.82776 | up | 66.58356    | 29.16489    | 35.37958    | 17.06861    | Detected | Detected    | Detected    | Detected    |
| 2761 | A_33_P3257714 | RPS23     | Hs.527193 | ribosomal protein S23                                                                                                                                      | Homo sapiens ribosomal protein S23 (RPS23), mRNA [NM_001025]                                                                                                                        | 2.36329 | up | 2.20032 | up | 6501.25700  | 2848.48270  | 5814.66650  | 2330.26050  | Detected | Detected    | Detected    | Detected    |
| 2762 | A_23_P137016  | SAT1      | Hs.28491  | spermidine/spermine N1-acetyltransferase 1                                                                                                                 | Homo sapiens spermidine/spermine N1-acetyltransferase 1 (SAT1), transcript variant 1, mRNA [NM_002970]                                                                              | 2.36308 | up | 2.49633 | up | 76012.30500 | 33307.28000 | 71746.69500 | 25343.42600 | Detected | Detected    | Detected    | Detected    |
| 2763 | A_23_P325887  | TBC1D8B   | Hs.351798 | TBC1 domain family, member 8B (with GRAM domain)                                                                                                           | Homo sapiens TBC1 domain family, member 8B (with GRAM domain) (TBC1D8B), transcript variant 1, mRNA [NM_017752]                                                                     | 2.36151 | up | 4.16199 | up | 103.12137   | 45.21602    | 49.63527    | 10.51610    | Detected | Detected    | Detected    | Compromised |
| 2764 | A_24_P341222  | C4orf52   | Hs.479386 | chromosome 4 open reading frame 52                                                                                                                         | Homo sapiens chromosome 4 open reading frame 52 (C4orf52), mRNA [NM_001145432]                                                                                                      | 2.36058 | up | 2.51449 | up | 4263.21730  | 1870.04140  | 4297.52730  | 1507.07260  | Detected | Detected    | Detected    | Detected    |
| 2765 | A_33_P3233754 | ZNF154    | Hs.646378 | zinc finger protein 154                                                                                                                                    | Homo sapiens zinc finger protein 154 (ZNF154), mRNA [NM_001085384]                                                                                                                  | 2.36054 | up | 1.94772 | up | 29.79250    | 13.06857    | 17.96855    | 8.13489     | Detected | Compromised | Detected    | Compromised |
| 2766 | A_24_P115502  |           |           |                                                                                                                                                            | Putative uncharacterized protein IFITM8P [Source:UniProtKB/TrEMBL;Acc:A8MWN3] [ENST00000399573]                                                                                     | 2.36033 | up | 1.93054 | up | 16764.60200 | 7354.50150  | 15668.59200 | 7156.77900  | Detected | Detected    | Detected    | Detected    |
| 2767 | A_23_P29124   | SEPT5     | Hs.283743 | septin 5                                                                                                                                                   | Homo sapiens septin 5 (SEPT5), mRNA [NM_002688]                                                                                                                                     | 2.36015 | up | 2.07686 | up | 2646.31320  | 1161.00850  | 3115.13650  | 1322.61790  | Detected | Detected    | Detected    | Detected    |
| 2768 | A_33_P3333156 | C11orf70  | Hs.98328  | chromosome 11 open reading frame 70                                                                                                                        | Homo sapiens chromosome 11 open reading frame 70 (C11orf70), mRNA [NM_032930]                                                                                                       | 2.35884 | up | 2.51342 | up | 317.96857   | 139.57830   | 220.50615   | 77.36099    | Detected | Detected    | Detected    | Detected    |
| 2769 | A_24_P96762   | TRNAU1AP  | Hs.533626 | tRNA selenocysteine 1 associated protein 1                                                                                                                 | Homo sapiens tRNA selenocysteine 1 associated protein 1 (TRNAU1AP), transcript variant 1, mRNA [NM_017846]                                                                          | 2.35793 | up | 2.44256 | up | 959.55990   | 421.37997   | 779.50775   | 281.41022   | Detected | Detected    | Detected    | Detected    |
| 2770 | A_33_P3382143 | LOC284900 |           | hypothetical LOC284900                                                                                                                                     | Homo sapiens hypothetical LOC284900 (LOC284900), transcript variant 2, non-coding RNA [NR_026962]                                                                                   | 2.35703 | up | 2.60260 | up | 277.78660   | 122.03377   | 168.28268   | 57.01615    | Detected | Detected    | Detected    | Detected    |
| 2771 | A_33_P3237567 |           | Hs.690701 |                                                                                                                                                            | CR987211 RZPD no.9017 Homo sapiens cDNA clone RZPDp9017M1210 5', mRNA sequence [CR987211]                                                                                           | 2.35699 | up | 2.99045 | up | 1016.26935  | 446.46120   | 1155.10180  | 340.60320   | Detected | Detected    | Detected    | Detected    |
| 2772 | A_32_P163858  | SCD       | Hs.558396 | stearoyl-CoA desaturase (delta-9-desaturase)                                                                                                               | Homo sapiens stearoyl-CoA desaturase (delta-9-desaturase) (SCD), mRNA [NM_005063]                                                                                                   | 2.35656 | up | 2.52604 | up | 2810.46390  | 1234.90110  | 2130.86470  | 743.84265   | Detected | Detected    | Detected    | Detected    |
| 2773 | A_33_P3359856 |           | Hs.721706 |                                                                                                                                                            | Protein FAM128A [Source:UniProtKB/Swiss-Prot;Acc:Q6P582] [ENST00000428332]                                                                                                          | 2.35653 | up | 2.53752 | up | 767.89464   | 337.32468   | 1008.73706  | 350.53738   | Detected | Detected    | Detected    | Detected    |
| 2774 | A_33_P3613516 | LOC254057 | Hs.586109 | hypothetical protein LOC254057                                                                                                                             | Homo sapiens cDNA: FLJ21000 fis. clone CAE03359 [AK024653]                                                                                                                          | 2.35561 | up | 2.27776 | up | 440.99380   | 193.84851   | 289.53830   | 112.08910   | Detected | Detected    | Detected    | Detected    |
| 2775 | A_33_P3335740 | FLJ10038  |           | hypothetical protein FLJ10038                                                                                                                              | Homo sapiens hypothetical protein FLJ10038 (FLJ10038), non-coding RNA [NR_026891]                                                                                                   | 2.35531 | up | 5.48010 | up | 111.27624   | 48.92008    | 65.02536    | 10.46308    | Detected | Detected    | Detected    | Compromised |
| 2776 | A_33_P3226177 | CYFIP2    | Hs.519702 | cytoplasmic FMR1 interacting protein 2                                                                                                                     | Homo sapiens cytoplasmic FMR1 interacting protein 2 (CYFIP2), transcript variant 2, mRNA [NM_001037332]                                                                             | 2.35153 | up | 2.90297 | up | 81.70776    | 35.97878    | 50.91779    | 15.46653    | Detected | Detected    | Detected    | Compromised |
| 2777 | A_24_P68222   |           |           |                                                                                                                                                            |                                                                                                                                                                                     | 2.35005 | up | 2.42193 | up | 715.95430   | 315.45773   | 574.90170   | 209.31367   | Detected | Detected    | Detected    | Detected    |

|      |               |              |           |                                                                      |                                                                                                                                        |         |    |         |    |             |            |            |            |          |             |             |             |
|------|---------------|--------------|-----------|----------------------------------------------------------------------|----------------------------------------------------------------------------------------------------------------------------------------|---------|----|---------|----|-------------|------------|------------|------------|----------|-------------|-------------|-------------|
| 2778 | A_33_P3409086 | S100A1       | Hs.515715 | S100 calcium binding protein A1                                      | Homo sapiens S100 calcium binding protein A1 (S100A1), mRNA [NM_006271]                                                                | 2.34954 | up | 1.65963 | up | 211.72447   | 93.30845   | 33.45704   | 17.77634   | Detected | Detected    | Detected    | Detected    |
| 2779 | A_33_P3241299 | LOC100128881 | Hs.666282 | similar to predicted protein                                         | Homo sapiens cDNA FLJ38967 fis, clone NT2R12002260 [AK096286]                                                                          | 2.34946 | up | 2.07457 | up | 97.31768    | 42.89000   | 119.72920  | 50.89067   | Detected | Detected    | Detected    | Detected    |
| 2780 | A_33_P3265494 | C6orf138     | Hs.659409 | chromosome 6 open reading frame 138                                  | Homo sapiens chromosome 6 open reading frame 138 (C6orf138), mRNA [NM_001013732]                                                       | 2.34920 | up | 2.24561 | up | 19.64230    | 8.65778    | 22.74603   | 8.93176    | Detected | Compromised | Detected    | Compromised |
| 2781 | A_33_P3383326 | LPAR1        | Hs.126667 | lysophosphatidic acid receptor 1                                     | Homo sapiens lysophosphatidic acid receptor 1 (LPAR1), transcript variant 2, mRNA [NM_057159]                                          | 2.34897 | up | 2.46416 | up | 12336.42100 | 5438.08200 | 6781.10840 | 2426.59640 | Detected | Detected    | Detected    | Detected    |
| 2782 | A_32_P319858  | NKPD1        | Hs.299256 | NTPase, KAP family P-loop domain containing 1                        | Homo sapiens NTPase, KAP family P-loop domain containing 1 (NKPD1), transcript variant 2, mRNA [NM_198478]                             | 2.34812 | up | 1.17813 | up | 22.74639    | 10.03057   | 11.89693   | 8.90446    | Detected | Compromised | Compromised | Compromised |
| 2783 | A_23_P206228  | VPS13C       | Hs.511668 | vacuolar protein sorting 13 homolog C (S. cerevisiae)                | Homo sapiens vacuolar protein sorting 13 homolog C (S. cerevisiae) (VPS13C), transcript variant 2A, mRNA [NM_020921]                   | 2.34804 | up | 2.57400 | up | 2970.34380  | 1309.88600 | 1857.76350 | 636.42490  | Detected | Detected    | Detected    | Detected    |
| 2784 | A_33_P3309222 | LOC441178    | Hs.648083 | hypothetical LOC441178                                               | Homo sapiens mRNA, cDNA DKFZp686H0413 (from clone DKFZp686H0413) [AL832737]                                                            | 2.34793 | up | 2.24538 | up | 465.61760   | 205.34212  | 312.76900  | 122.82831  | Detected | Detected    | Detected    | Detected    |
| 2785 | A_33_P3228762 | SLC25A36     | Hs.144130 | solute carrier family 25, member 36                                  | Homo sapiens solute carrier family 25, member 36 (SLC25A36), transcript variant 1, mRNA [NM_001104647]                                 | 2.34583 | up | 2.13162 | up | 3990.18300  | 1761.28480 | 2160.92820 | 893.91580  | Detected | Detected    | Detected    | Detected    |
| 2786 | A_33_P3220105 | LOC644246    | Hs.644600 | hypothetical protein LOC644246                                       | LOC644246 protein fragment [Source:UniProtKB/TrEMBL;Acc:G8W558] [ENSST00000398275]                                                     | 2.34504 | up | 2.94493 | up | 153.64711   | 67.84344   | 235.44266  | 70.49780   | Detected | Detected    | Detected    | Detected    |
| 2787 | A_33_P3315239 |              | Hs.493218 |                                                                      | Zinc finger protein 7 (Zinc finger protein KOX-4)/Zinc finger protein HF18 [Source:UniProtKB/Swiss-Prot;Acc:P17097] [ENSST00000325217] | 2.34354 | up | 2.86902 | up | 38.93568    | 17.20318   | 60.54463   | 18.60835   | Detected | Detected    | Detected    | Detected    |
| 2788 | A_24_P64653   | METTL7B      | Hs.51483  | methyltransferase like 7B                                            | Homo sapiens methyltransferase like 7B (METTL7B), mRNA [NM_152637]                                                                     | 2.34229 | up | 2.97289 | up | 79.06632    | 34.95292   | 94.60976   | 28.06228   | Detected | Detected    | Detected    | Detected    |
| 2789 | A_24_P333421  | ZNF862       | Hs.301277 | zinc finger protein 862                                              | Homo sapiens zinc finger protein 862 (ZNF862), mRNA [NM_001099220]                                                                     | 2.34188 | up | 2.42542 | up | 967.14680   | 427.62290  | 636.14233  | 231.27760  | Detected | Detected    | Detected    | Detected    |
| 2790 | A_33_P3235262 | PIP5K1L      | Hs.445486 | phosphatidylinositol-4-phosphate 5-kinase-like 1                     | Homo sapiens phosphatidylinositol-4-phosphate 5-kinase-like 1 (PIP5K1L), transcript variant 1, mRNA [NM_001135219]                     | 2.34106 | up | 2.35361 | up | 406.55316   | 179.81961  | 350.87190  | 131.45598  | Detected | Detected    | Detected    | Detected    |
| 2791 | A_24_P365180  | DSEL         | Hs.124673 | dermatan sulfate epimerase-like                                      | Homo sapiens dermatan sulfate epimerase-like (DSEL), mRNA [NM_032160]                                                                  | 2.34034 | up | 2.51360 | up | 1420.88230  | 628.65360  | 675.55530  | 236.99023  | Detected | Detected    | Detected    | Detected    |
| 2792 | A_33_P3287710 | LOC100128292 |           | hypothetical LOC100128292                                            | Homo sapiens hypothetical LOC100128292 (LOC100128292), non-coding RNA [NR_024585]                                                      | 2.33994 | up | 2.49741 | up | 1077.96860  | 477.01855  | 816.79160  | 288.39450  | Detected | Detected    | Detected    | Detected    |
| 2793 | A_23_P21376   | MAGI2        | Hs.603842 | membrane associated guanylate kinase, WW and PDZ domain containing 2 | Homo sapiens membrane associated guanylate kinase, WW and PDZ domain containing 2 (MAGI2), mRNA [NM_012301]                            | 2.33914 | up | 2.92175 | up | 293.67280   | 129.99911  | 174.71713  | 52.72998   | Detected | Detected    | Detected    | Detected    |
| 2794 | A_33_P3251369 | GAB3         | Hs.496982 | GRB2-associated binding protein 3                                    | Homo sapiens GRB2-associated binding protein 3 (GAB3), transcript variant 1, mRNA [NM_001081573]                                       | 2.33747 | up | 1.31246 | up | 34.36458    | 15.22294   | 24.17799   | 16.24427   | Detected | Compromised | Detected    | Compromised |
| 2795 | A_24_P391991  | FAM183B      | Hs.144075 | acyloylacyl hydrolase (neutrophil)                                   | Homo sapiens family with sequence similarity 183, member B (FAM183B), non-coding RNA [NR_028347]                                       | 2.33703 | up | 2.10748 | up | 50.57869    | 22.40968   | 49.91826   | 20.88632   | Detected | Detected    | Detected    | Detected    |
| 2796 | A_33_P3277674 | FBXL22       | Hs.656997 | F-box and leucine-rich repeat protein 22                             | Homo sapiens F-box and leucine-rich repeat protein 22 (FBXL22), mRNA [NM_203373]                                                       | 2.33680 | up | 2.33731 | up | 35.19154    | 15.59376   | 20.35587   | 7.67961    | Detected | Compromised | Detected    | Compromised |
| 2797 | A_33_P3302861 | RPGRIP1L     | Hs.298382 | RPGRIP1-like                                                         | Homo sapiens RPGRIP1-like (RPGRIP1L), transcript variant 1, mRNA [NM_015272]                                                           | 2.33495 | up | 3.33732 | up | 67.14003    | 29.77402   | 65.51793   | 17.31122   | Detected | Detected    | Detected    | Detected    |
| 2798 | A_32_P154473  | KIF5C        | Hs.660699 | kinesin family member 5C                                             | Homo sapiens kinesin family member 5C (KIF5C), mRNA [NM_004522]                                                                        | 2.33480 | up | 4.15457 | up | 32.94513    | 14.61084   | 18.73256   | 3.97591    | Detected | Compromised | Detected    | Compromised |
| 2799 | A_23_P429461  | FUK          | Hs.7907   | fucokinase                                                           | Homo sapiens fucokinase (FUK), mRNA [NM_145059]                                                                                        | 2.33395 | up | 2.19714 | up | 979.59906   | 434.60077  | 879.63530  | 353.02975  | Detected | Detected    | Detected    | Detected    |
| 2800 | A_23_P206107  | ULK3         | Hs.513034 | unc-51-like kinase 3 (C. elegans)                                    | Homo sapiens unc-51-like kinase 3 (C. elegans) (ULK3), mRNA [NM_001099436]                                                             | 2.33328 | up | 2.01522 | up | 1459.37130  | 647.63745  | 1221.96300 | 534.68976  | Detected | Detected    | Detected    | Detected    |
| 2801 | A_33_P3358943 | GRM2         | Hs.121510 | glutamate receptor, metabotropic 2                                   | Homo sapiens glutamate receptor, metabotropic 2 (GRM2), transcript variant 1, mRNA [NM_000839]                                         | 2.33313 | up | 2.20114 | up | 20.29636    | 9.00768    | 9.50821    | 3.80904    | Detected | Compromised | Compromised | Compromised |
| 2802 | A_24_P144601  | POU5F1       | Hs.249184 | POU class 5 homeobox 1                                               | Homo sapiens POU class 5 homeobox 1 (POU5F1), transcript variant 1, mRNA [NM_002701]                                                   | 2.33283 | up | 1.94667 | up | 34.96261    | 15.51868   | 40.08314   | 18.15659   | Detected | Compromised | Detected    | Detected    |
| 2803 | A_33_P3220425 | LOC100288667 | Hs.720041 | hypothetical protein LOC100288667                                    | PREDICTED: Homo sapiens hypothetical protein LOC100288667 (LOC100288667), mRNA [XM_002344252]                                          | 2.33248 | up | 3.60038 | up | 18.25897    | 8.10571    | 17.99122   | 4.40634    | Detected | Compromised | Detected    | Compromised |
| 2804 | A_33_P3258383 |              |           |                                                                      |                                                                                                                                        | 2.33241 | up | 3.01843 | up | 55.43835    | 24.61155   | 63.49353   | 18.54869   | Detected | Detected    | Detected    | Detected    |
| 2805 | A_24_P456723  | LOC728537    | Hs.469369 | hypothetical protein LOC728537                                       | PREDICTED: Homo sapiens hypothetical protein LOC728537 (LOC728537), miscRNA [XR_041702]                                                | 2.33227 | up | 2.22359 | up | 346.23230   | 153.71710  | 304.51190  | 120.75785  | Detected | Detected    | Detected    | Detected    |
| 2806 | A_33_P3254331 | CTRC         | Hs.631869 | chymotrypsin C (caldecrin)                                           | Homo sapiens chymotrypsin C (caldecrin) (CTRC), mRNA [NM_007272]                                                                       | 2.33075 | up | 3.04160 | up | 105.74942   | 46.98032   | 116.66219  | 33.82156   | Detected | Detected    | Detected    | Detected    |
| 2807 | A_23_P29029   | C21orf119    | Hs.58149  | chromosome 21 open reading frame 119                                 | Homo sapiens chromosome 21 open reading frame 119 (C21orf119), non-coding RNA [NR_026845]                                              | 2.33009 | up | 2.18511 | up | 968.08130   | 430.20126  | 1164.46030 | 469.91345  | Detected | Detected    | Detected    | Detected    |

|      |               |              |           |                                                              |                                                                                                                                       |         |    |         |    |             |             |             |            |          |             |             |             |
|------|---------------|--------------|-----------|--------------------------------------------------------------|---------------------------------------------------------------------------------------------------------------------------------------|---------|----|---------|----|-------------|-------------|-------------|------------|----------|-------------|-------------|-------------|
| 2808 | A_33_P3267865 |              |           |                                                              | major histocompatibility complex, class I, J (pseudogene) (HLA-J), non-coding RNA [Source:RefSeq DNA:Acc:NR_024240] [ENST00000376793] | 2.32928 | up | 1.66471 | up | 2880.13260  | 1280.33420  | 1449.09310  | 767.57740  | Detected | Detected    | Detected    | Detected    |
| 2809 | A_23_P25348   | ACAD10       | Hs.331141 | acyl-Coenzyme A dehydrogenase family, member 10              | Homo sapiens acyl-Coenzyme A dehydrogenase family, member 10 (ACAD10), transcript variant 2, mRNA [NM_025247]                         | 2.32928 | up | 2.12070 | up | 268.87170   | 119.52458   | 206.07866   | 85.68770   | Detected | Detected    | Detected    | Detected    |
| 2810 | A_23_P147025  | RAB33A       | Hs.654356 | RAB33A, member RAS oncogene family                           | Homo sapiens RAB33A, member RAS oncogene family (RAB33A), mRNA [NM_004794]                                                            | 2.32888 | up | 2.47846 | up | 1042.98770  | 463.72916   | 865.04297   | 307.76636  | Detected | Detected    | Detected    | Detected    |
| 2811 | A_23_P53198   | DGAT2        | Hs.129798 | diacylglycerol O-acyltransferase homolog 2 (mouse)           | Homo sapiens diacylglycerol O-acyltransferase homolog 2 (mouse) (DGAT2), mRNA [NM_032564]                                             | 2.32811 | up | 2.30272 | up | 377.54877   | 167.92021   | 338.92368   | 129.78552  | Detected | Detected    | Detected    | Detected    |
| 2812 | A_23_P56759   | KRCC1        | Hs.469254 | lysine-rich coiled-coil 1                                    | Homo sapiens lysine-rich coiled-coil 1 (KRCC1), mRNA [NM_016618]                                                                      | 2.32763 | up | 2.31382 | up | 6512.28500  | 2897.02370  | 4870.27440  | 1856.04990 | Detected | Detected    | Detected    | Detected    |
| 2813 | A_33_P3290296 | LOC100130175 | Hs.232543 | hypothetical protein LOC100130175                            | Homo sapiens cDNA FLJ43841 fis, clone TESTH008137, [AK125829]                                                                         | 2.32733 | up | 3.15363 | up | 1304.85530  | 580.54690   | 624.36145   | 174.57849  | Detected | Detected    | Detected    | Detected    |
| 2814 | A_33_P3234580 | ASS1         | Hs.160786 | argininosuccinate synthetase 1                               | Homo sapiens argininosuccinate synthetase 1 (ASS1), transcript variant 1, mRNA [NM_000050]                                            | 2.32636 | up | 2.15684 | up | 25485.38500 | 11343.48900 | 15723.23900 | 6428.20360 | Detected | Detected    | Detected    | Detected    |
| 2815 | A_23_P346900  | CACNA2D2     | Hs.476273 | calcium channel, voltage-dependent, alpha 2/delta subunit 2  | Homo sapiens calcium channel, voltage-dependent, alpha 2/delta subunit 2 (CACNA2D2), transcript variant 1, mRNA [NM_001005505]        | 2.32627 | up | 1.99817 | up | 59.61094    | 26.53373    | 57.67135    | 25.45038   | Detected | Detected    | Detected    | Detected    |
| 2816 | A_32_P222684  | PRDM6        | Hs.135118 | PR domain containing 6                                       | Homo sapiens PR domain containing 6 (PRDM6), mRNA [NM_001136239]                                                                      | 2.32584 | up | 2.77220 | up | 174.47495   | 77.67580    | 170.55429   | 54.25047   | Detected | Detected    | Detected    | Detected    |
| 2817 | A_33_P3330503 | ALDH7A1      | Hs.483239 | aldehyde dehydrogenase 7 family, member A1                   | Homo sapiens aldehyde dehydrogenase 7 family, member A1 (ALDH7A1), mRNA [NM_001182]                                                   | 2.32577 | up | 2.67357 | up | 1016.87146  | 452.72336   | 675.88760   | 222.91962  | Detected | Detected    | Detected    | Detected    |
| 2818 | A_33_P3408203 | TGFA         | Hs.170009 | transforming growth factor, alpha                            | Homo sapiens transforming growth factor, alpha (TGFA), transcript variant 1, mRNA [NM_003236]                                         | 2.32507 | up | 1.99030 | up | 8896.59600  | 3962.06250  | 1434.51870  | 635.55554  | Detected | Detected    | Detected    | Detected    |
| 2819 | A_32_P152437  | AKAP12       | Hs.371240 | A kinase (PRKA) anchor protein 12                            | Homo sapiens A kinase (PRKA) anchor protein 12 (AKAP12), transcript variant 1, mRNA [NM_005100]                                       | 2.32467 | up | 2.30529 | up | 13265.36100 | 5908.69400  | 13115.11300 | 5016.63530 | Detected | Detected    | Detected    | Detected    |
| 2820 | A_23_P57760   | ACPL2        | Hs.657887 | acid phosphatase-like 2                                      | Homo sapiens acid phosphatase-like 2 (ACPL2), transcript variant 1, mRNA [NM_152282]                                                  | 2.32264 | up | 2.38604 | up | 2976.98970  | 1327.17400  | 2150.30830  | 794.67340  | Detected | Detected    | Detected    | Detected    |
| 2821 | A_23_P356139  | FAM178A      | Hs.447458 | family with sequence similarity 178, member A                | Homo sapiens family with sequence similarity 178, member A (FAM178A), transcript variant 1, mRNA [NM_018121]                          | 2.32254 | up | 1.98721 | up | 304.18620   | 135.61546   | 203.93115   | 90.49079   | Detected | Detected    | Detected    | Detected    |
| 2822 | A_33_P3284473 | LOC100130798 | Hs.527241 | similar to hCG2045013                                        | PREDICTED: Homo sapiens similar to hCG2045013 (LOC100130798), mRNA [XM_001718781]                                                     | 2.32222 | xm | 3.14538 | up | 16.55139    | 7.38014     | 10.56901    | 2.96296    | Detected | Compromised | Compromised | Compromised |
| 2823 | A_23_P71972   | WWOX         | Hs.461453 | WW domain containing oxidoreductase                          | Homo sapiens WW domain containing oxidoreductase (WWOX), transcript variant 1, mRNA [NM_016373]                                       | 2.32207 | up | 3.39895 | up | 177.84221   | 79.30357    | 167.45510   | 43.44295   | Detected | Detected    | Detected    | Detected    |
| 2824 | A_23_P1519    | PITPNM1      | Hs.372295 | phosphatidylinositol transfer protein, membrane-associated 1 | Homo sapiens phosphatidylinositol transfer protein, membrane-associated 1 (PITPNM1), transcript variant 1, mRNA [NM_004910]           | 2.32192 | up | 1.73966 | up | 562.36414   | 250.78635   | 575.59830   | 291.75583  | Detected | Detected    | Detected    | Detected    |
| 2825 | A_23_P160940  | ABCA4        | Hs.416707 | ATP-binding cassette, sub-family A (ABCA1), member 4         | Homo sapiens ATP-binding cassette, sub-family A (ABCA1), member 4 (ABCA4), mRNA [NM_000350]                                           | 2.32185 | up | 1.94074 | up | 28.90618    | 12.89106    | 32.47874    | 14.75695   | Detected | Compromised | Detected    | Detected    |
| 2826 | A_24_P349196  | CCDC30       | Hs.473495 | coiled-coil domain containing 30                             | Homo sapiens coiled-coil domain containing 30 (CCDC30), mRNA [NM_001080850]                                                           | 2.32051 | up | 2.03115 | up | 83.26384    | 37.15405    | 68.28317    | 29.64396   | Detected | Detected    | Detected    | Detected    |
| 2827 | A_24_P74070   | PARD6G       | Hs.654920 | par-6 partitioning defective 6 homolog gamma (C. elegans)    | Homo sapiens par-6 partitioning defective 6 homolog gamma (C. elegans) (PARD6G), mRNA [NM_032510]                                     | 2.31916 | up | 2.24791 | up | 220.83913   | 98.64500    | 162.84933   | 63.88125   | Detected | Detected    | Detected    | Detected    |
| 2828 | A_23_P18798   | PCDH9        | Hs.662726 | protocadherin beta 9                                         | Homo sapiens protocadherin beta 9 (PCDH9), mRNA [NM_019119]                                                                           | 2.31871 | up | 1.47980 | up | 34.56656    | 15.43630    | 22.15333    | 13.20086   | Detected | Detected    | Detected    | Detected    |
| 2829 | A_23_P17242   | ABHD1        | Hs.375791 | abhydrolase domain containing 1                              | Homo sapiens abhydrolase domain containing 1 (ABHD1), mRNA [NM_032604]                                                                | 2.31800 | up | 2.21073 | up | 57.26365    | 25.57984    | 76.37738    | 30.46451   | Detected | Detected    | Detected    | Detected    |
| 2830 | A_23_P106922  | CHST6        | Hs.655622 | carbohydrate (N-acetylglucosamine 6-O) sulfotransferase 6    | Homo sapiens carbohydrate (N-acetylglucosamine 6-O) sulfotransferase 6 (CHST6), mRNA [NM_021615]                                      | 2.31561 | up | 2.86774 | up | 95.40712    | 42.66274    | 126.01718   | 38.74852   | Detected | Detected    | Detected    | Detected    |
| 2831 | A_23_P338534  | HIF3A        | Hs.420830 | hypoxia inducible factor 3, alpha subunit                    | Homo sapiens hypoxia inducible factor 3, alpha subunit (HIF3A), transcript variant 2, mRNA [NM_022462]                                | 2.31460 | up | 1.91545 | up | 25.31718    | 11.32589    | 24.02550    | 11.06030   | Detected | Compromised | Detected    | Compromised |
| 2832 | A_23_P67198   | CPAMD8       | Hs.631644 | C3 and PZP-like, alpha-2-macroglobulin domain containing 8   | Homo sapiens C3 and PZP-like, alpha-2-macroglobulin domain containing 8 (CPAMD8), mRNA [NM_015692]                                    | 2.31455 | up | 2.39897 | up | 458.34467   | 205.04947   | 467.16900   | 171.71740  | Detected | Detected    | Detected    | Detected    |
| 2833 | A_33_P3257312 | ATG2A        | Hs.370671 | ATG2 autophagy related 2 homolog A (S. cerevisiae)           | Homo sapiens ATG2 autophagy related 2 homolog A (S. cerevisiae) (ATG2A), mRNA [NM_015104]                                             | 2.31339 | up | 2.39149 | up | 16800.50200 | 7519.78800  | 11299.13300 | 4166.22100 | Detected | Detected    | Detected    | Detected    |
| 2834 | A_33_P3286146 | LOC100132891 | Hs.137674 | hypothetical protein LOC100132891                            | Homo sapiens mRNA: cDNA DKFZp886E16147 (from clone DKFZp886E16147) [BX047470]                                                         | 2.31326 | up | 1.89982 | up | 24.85642    | 11.12622    | 17.69148    | 8.21142    | Detected | Compromised | Detected    | Compromised |
| 2835 | A_23_P46396   | PTBP2        | Hs.269895 | polypyrimidine tract binding protein 2                       | Homo sapiens polypyrimidine tract binding protein 2 (PTBP2), mRNA [NM_021190]                                                         | 2.31092 | up | 1.99432 | up | 2844.90550  | 1274.72250  | 2396.92290  | 1059.80310 | Detected | Detected    | Detected    | Detected    |
| 2836 | A_23_P48988   | SH3GL3       | Hs.270055 | SH3-domain GRB2-like 3                                       | Homo sapiens SH3-domain GRB2-like 3 (SH3GL3), transcript variant 1, mRNA [NM_003027]                                                  | 2.30984 | up | 3.83442 | up | 215.94376   | 96.80366    | 179.34459   | 41.24333   | Detected | Detected    | Detected    | Detected    |

|      |               |              |           |                                                                     |                                                                                                                                     |         |    |         |    |             |             |             |             |          |             |             |             |
|------|---------------|--------------|-----------|---------------------------------------------------------------------|-------------------------------------------------------------------------------------------------------------------------------------|---------|----|---------|----|-------------|-------------|-------------|-------------|----------|-------------|-------------|-------------|
| 2837 | A_24_P314451  | F8           | Hs.654450 | coagulation factor VIII, procoagulant component                     | Homo sapiens coagulation factor VIII, procoagulant component (F8), transcript variant 1, mRNA [NM_000132]                           | 2.30895 | up | 2.18187 | up | 142.65890   | 63.97610    | 148.23839   | 59.90983    | Detected | Detected    | Detected    | Detected    |
| 2838 | A_23_P103503  | MDM4         | Hs.497492 | Mdm4 p53 binding protein homolog (mouse)                            | Homo sapiens Mdm4 p53 binding protein homolog (mouse) (MDM4), transcript variant 1, mRNA [NM_002393]                                | 2.30715 | up | 2.33755 | up | 756.61145   | 339.57065   | 546.32025   | 206.08778   | Detected | Detected    | Detected    | Detected    |
| 2839 | A_32_P46214   | SLC9A9       | Hs.302257 | solute carrier family 9 (sodium/hydrogen exchanger), member 9       | Homo sapiens solute carrier family 9 (sodium/hydrogen exchanger), member 9 (SLC9A9), mRNA [NM_173653]                               | 2.30705 | up | 2.22629 | up | 1814.53260  | 814.40760   | 1675.92520  | 663.80280   | Detected | Detected    | Detected    | Detected    |
| 2840 | A_24_P29277   | COL4A3BP     | Hs.270437 | collagen, type IV, alpha 3 (Goodpasture antigen) binding protein    | Homo sapiens collagen, type IV, alpha 3 (Goodpasture antigen) binding protein (COL4A3BP), transcript variant 3, mRNA [NM_001130105] | 2.30696 | up | 2.21244 | up | 3519.91140  | 1579.87960  | 2687.12300  | 1070.97900  | Detected | Detected    | Detected    | Detected    |
| 2841 | A_23_P210763  | JAG1         | Hs.224012 | jagged 1 (Alagille syndrome)                                        | Homo sapiens jagged 1 (Alagille syndrome) (JAG1), mRNA [NM_000214]                                                                  | 2.30623 | up | 2.24314 | up | 506.22467   | 227.28627   | 381.18372   | 149.84561   | Detected | Detected    | Detected    | Detected    |
| 2842 | A_24_P79808   | PBXIP1       | Hs.505806 | pre-B-cell leukemia homeobox interacting protein 1                  | Homo sapiens pre-B-cell leukemia homeobox interacting protein 1 (PBXIP1), mRNA [NM_020524]                                          | 2.30533 | up | 2.02605 | up | 877.11070   | 393.96155   | 828.46550   | 360.57007   | Detected | Detected    | Detected    | Detected    |
| 2843 | A_23_P207319  | MAP3K14      | Hs.404183 | mitogen-activated protein kinase kinase kinase 14                   | Homo sapiens mitogen-activated protein kinase kinase kinase 14 (MAP3K14), mRNA [NM_003954]                                          | 2.30530 | up | 1.89458 | up | 659.59280   | 296.26627   | 780.44305   | 363.24063   | Detected | Detected    | Detected    | Detected    |
| 2844 | A_32_P43465   | ZNF182       | Hs.189690 | zinc finger protein 182                                             | Homo sapiens zinc finger protein 182 (ZNF182), transcript variant 1, mRNA [NM_006962]                                               | 2.30508 | up | 1.95825 | up | 1189.47110  | 534.32010   | 1156.96250  | 520.97500   | Detected | Detected    | Detected    | Detected    |
| 2845 | A_24_P737939  | C6orf154     | Hs.445552 | chromosome 6 open reading frame 154                                 | Homo sapiens chromosome 6 open reading frame 154 (C6orf154), mRNA [NM_001012974]                                                    | 2.30474 | up | 2.53114 | up | 931.82370   | 418.55360   | 930.20715   | 324.06244   | Detected | Detected    | Detected    | Detected    |
| 2846 | A_24_P178444  |              |           |                                                                     |                                                                                                                                     | 2.30220 | up | 2.12078 | up | 7509.43100  | 3377.51700  | 7071.14600  | 2940.08810  | Detected | Detected    | Detected    | Detected    |
| 2847 | A_23_P201731  | TRAF5        | Hs.523930 | TNF receptor-associated factor 5                                    | Homo sapiens TNF receptor-associated factor 5 (TRAF5), transcript variant 1, mRNA [NM_004619]                                       | 2.30207 | up | 2.39001 | up | 883.25310   | 397.28363   | 688.33620   | 253.96054   | Detected | Detected    | Detected    | Detected    |
| 2848 | A_23_P414978  | NUDT14       | Hs.526432 | nudix (nucleoside diphosphate linked moiety X)-type motif 14        | Homo sapiens nudix (nucleoside diphosphate linked moiety X)-type motif 14 (NUDT14), mRNA [NM_177533]                                | 2.30179 | up | 2.49665 | up | 77.89579    | 35.04144    | 94.93017    | 33.52837    | Detected | Detected    | Detected    | Detected    |
| 2849 | A_23_P121527  | KLHL5        | Hs.272251 | kelch-like 5 (Drosophila)                                           | Homo sapiens kelch-like 5 (Drosophila) (KLHL5), transcript variant 1, mRNA [NM_015990]                                              | 2.30177 | up | 2.44544 | up | 1230.58370  | 553.58220   | 987.60876   | 356.11777   | Detected | Detected    | Detected    | Detected    |
| 2850 | A_24_P170774  | LRCH1        | Hs.507971 | leucine-rich repeats and calponin homology (CH) domain containing 1 | Homo sapiens leucine-rich repeats and calponin homology (CH) domain containing 1 (LRCH1), transcript variant 2, mRNA [NM_015116]    | 2.30141 | up | 3.58235 | up | 27.38331    | 12.32039    | 18.23209    | 4.48780     | Detected | Compromised | Detected    | Compromised |
| 2851 | A_33_P3383184 | SP9          |           | Sp9 transcription factor homolog (mouse)                            | [Source:RefSeq peptide:Acc:NP_001138722] [ENST00000394967]                                                                          | 2.30118 | up | 2.31777 | up | 1256.24300  | 565.27045   | 1066.03760  | 396.33698   | Detected | Detected    | Detected    | Detected    |
| 2852 | A_23_P10911   | PLBD2        | Hs.115896 | phospholipase B domain containing 2                                 | Homo sapiens phospholipase B domain containing 2 (PLBD2), transcript variant 1, mRNA [NM_173542]                                    | 2.30036 | up | 2.93600 | up | 766.39813   | 344.97806   | 771.40710   | 231.68225   | Detected | Detected    | Detected    | Detected    |
| 2853 | A_23_P436526  | SLC25A42     | Hs.303669 | solute carrier family 25, member 42                                 | Homo sapiens solute carrier family 25, member 42 (SLC25A42), mRNA [NM_178526]                                                       | 2.30027 | up | 2.00497 | up | 450.39150   | 202.74222   | 405.11227   | 178.16902   | Detected | Detected    | Detected    | Detected    |
| 2854 | A_32_P225659  | UTS2D        | Hs.518492 | urotensin 2 domain containing                                       | Homo sapiens urotensin 2 domain containing (UTS2D), mRNA [NM_198152]                                                                | 2.29964 | up | 2.03967 | up | 111.44338   | 50.17961    | 56.87801    | 24.58949    | Detected | Detected    | Detected    | Detected    |
| 2855 | A_33_P3362521 | C3orf19      | Hs.517820 | chromosome 3 open reading frame 19                                  | Homo sapiens chromosome 3 open reading frame 19 (C3orf19), mRNA [NM_016474]                                                         | 2.29898 | up | 2.14456 | up | 5434.84770  | 2447.84990  | 4127.92200  | 1697.29880  | Detected | Detected    | Detected    | Detected    |
| 2856 | A_24_P311771  | ZFR          | Hs.435231 | zinc finger RNA binding protein                                     | Homo sapiens zinc finger RNA binding protein (ZFR), mRNA [NM_016107]                                                                | 2.29874 | up | 1.85250 | up | 711.28090   | 320.39453   | 563.86346   | 268.39987   | Detected | Detected    | Detected    | Detected    |
| 2857 | A_23_P214627  | AIF1         | Hs.76364  | allograft inflammatory factor 1                                     | Homo sapiens allograft inflammatory factor 1 (AIF1), transcript variant 2, mRNA [NM_004847]                                         | 2.29797 | up | 2.78990 | up | 12.81018    | 5.77223     | 8.09217     | 2.55766     | Detected | Compromised | Compromised | Compromised |
| 2858 | A_32_P150391  | C17orf100    | Hs.262480 | chromosome 17 open reading frame 100                                | Homo sapiens chromosome 17 open reading frame 100 (C17orf100), mRNA [NM_001105520]                                                  | 2.29789 | up | 2.20188 | up | 304.92603   | 137.40367   | 273.53470   | 109.54278   | Detected | Detected    | Detected    | Detected    |
| 2859 | A_33_P3291414 |              | Hs.678863 |                                                                     | Homo sapiens cDNA FLJ34930 fis, clone NT2RP7004961 [AK092249]                                                                       | 2.29773 | up | 2.45460 | up | 5282.55300  | 2380.55300  | 1166.80430  | 419.16217   | Detected | Detected    | Detected    | Detected    |
| 2860 | A_33_P3246829 | IL1RN        | Hs.81134  | interleukin 1 receptor antagonist                                   | Homo sapiens interleukin 1 receptor antagonist (IL1RN), transcript variant 1, mRNA [NM_173842]                                      | 2.29734 | up | 3.26650 | up | 261.05804   | 117.66419   | 212.56012   | 57.38056    | Detected | Detected    | Detected    | Detected    |
| 2861 | A_32_P42574   | C1orf198     | Hs.520494 | chromosome 1 open reading frame 198                                 | Homo sapiens chromosome 1 open reading frame 198 (C1orf198), transcript variant 1, mRNA [NM_032800]                                 | 2.29708 | up | 2.30443 | up | 39845.16000 | 17961.08000 | 34561.94000 | 13225.13900 | Detected | Detected    | Detected    | Detected    |
| 2862 | A_33_P3316978 | RNF207       | Hs.716549 | ring finger protein 207                                             | Homo sapiens ring finger protein 207 (RNF207), mRNA [NM_207396]                                                                     | 2.29626 | up | 4.41175 | up | 46.46422    | 20.95224    | 30.60785    | 6.11769     | Detected | Detected    | Detected    | Compromised |
| 2863 | A_33_P3251163 | LOC100131869 | Hs.529989 | hypothetical protein LOC100131869                                   | Homo sapiens cDNA FLJ42372 fis, clone UTERU2031084. [AK124363]                                                                      | 2.29475 | up | 1.12487 | up | 18.87657    | 8.51767     | 10.86844    | 8.51985     | Detected | Compromised | Compromised | Compromised |
| 2864 | A_23_P31921   | ASS1         | Hs.160786 | argininosuccinate synthetase 1                                      | Homo sapiens argininosuccinate synthetase 1 (ASS1), transcript variant 1, mRNA [NM_000050]                                          | 2.29379 | up | 2.10478 | up | 3960.42850  | 1787.80910  | 3800.42200  | 1592.17440  | Detected | Detected    | Detected    | Detected    |
| 2865 | A_33_P3283201 |              | Hs.715264 |                                                                     | Putative uncharacterized protein ENSP00000367676 [Source:UniProtKB/TrEMBL:Acc:B7WP47] [ENST00000378420]                             | 2.29341 | up | 3.88352 | up | 24.06711    | 10.86615    | 12.12568    | 2.75325     | Detected | Compromised | Compromised | Compromised |
| 2866 | A_23_P14708   | ZNF280D      | Hs.511477 | zinc finger protein 280D                                            | Homo sapiens zinc finger protein 280D (ZNF280D), transcript variant 1, mRNA [NM_017661]                                             | 2.29334 | up | 2.40493 | up | 542.96480   | 245.15300   | 477.73580   | 175.16635   | Detected | Detected    | Detected    | Detected    |



|      |               |           |           |                                                                                           |                                                                                                                                                        |         |    |         |    |             |             |             |             |          |             |             |             |
|------|---------------|-----------|-----------|-------------------------------------------------------------------------------------------|--------------------------------------------------------------------------------------------------------------------------------------------------------|---------|----|---------|----|-------------|-------------|-------------|-------------|----------|-------------|-------------|-------------|
| 2867 | A_32_P125771  | RGS22     | Hs.120021 | regulator of G-protein signaling 22                                                       | Homo sapiens regulator of G-protein signaling 22 (RGS22), mRNA [NM_015668]                                                                             | 2.29209 | up | 2.28812 | up | 20.21099    | 9.13038     | 9.85848     | 3.79924     | Detected | Compromised | Compromised | Compromised |
| 2868 | A_33_P3293798 | KRTAP10-1 | Hs.688631 | keratin associated protein 10-1                                                           | Homo sapiens keratin associated protein 10-1 (KRTAP10-1), mRNA [NM_198691]                                                                             | 2.29173 | up | 2.68833 | up | 1879.59290  | 849.24600   | 1016.12286  | 333.29507   | Detected | Detected    | Detected    | Detected    |
| 2869 | A_24_P287189  | TOLLIP    | Hs.719949 | toll interacting protein                                                                  | Homo sapiens toll interacting protein (TOLLIP), mRNA [NM_019009]                                                                                       | 2.29168 | up | 5.45906 | up | 504.90024   | 228.13170   | 225.51454   | 36.42691    | Detected | Detected    | Detected    | Detected    |
| 2870 | A_32_P122940  | LOC642852 | Hs.710382 | hypothetical LOC642852                                                                    | Homo sapiens hypothetical LOC642852 (LOC642852), non-coding RNA [NR_028943]                                                                            | 2.29103 | up | 2.67759 | up | 766.01980   | 346.21237   | 723.54240   | 238.27888   | Detected | Detected    | Detected    | Detected    |
| 2871 | A_32_P90483   | STXBP4    | Hs.35199  | syntaxin binding protein 4                                                                | Homo sapiens syntaxin binding protein 4 (STXBP4), mRNA [NM_178509]                                                                                     | 2.28970 | up | 2.14294 | up | 101.43932   | 45.87333    | 109.50288   | 45.05888    | Detected | Detected    | Detected    | Detected    |
| 2872 | A_23_P154358  | PROM2     | Hs.469313 | prominin 2                                                                                | Homo sapiens prominin 2 (PROM2), transcript variant 3, mRNA [NM_144707]                                                                                | 2.28958 | up | 4.59937 | up | 26.23198    | 11.86339    | 15.08279    | 2.89167     | Detected | Compromised | Detected    | Compromised |
| 2873 | A_23_P112482  | AQP3      | Hs.234642 | aquaporin 3 (Gill blood group)                                                            | Homo sapiens aquaporin 3 (Gill blood group) (AQP3), mRNA [NM_004925]                                                                                   | 2.28935 | up | 1.90883 | up | 56.82177    | 25.70020    | 53.52462    | 24.72588    | Detected | Detected    | Detected    | Detected    |
| 2874 | A_23_P415401  | KLF9      | Hs.150557 | Kruppel-like factor 9                                                                     | Homo sapiens Kruppel-like factor 9 (KLF9), mRNA [NM_001206]                                                                                            | 2.28878 | up | 2.28350 | up | 29898.14500 | 13526.10800 | 27647.41600 | 10676.27050 | Detected | Detected    | Detected    | Detected    |
| 2875 | A_33_P3233871 | F12       | Hs.1321   | coagulation factor XII (Hageman factor)                                                   | Homo sapiens coagulation factor XII (Hageman factor) (F12), mRNA [NM_000505]                                                                           | 2.28839 | up | 2.09255 | up | 1038.35940  | 469.84015   | 907.89685   | 382.58400   | Detected | Detected    | Detected    | Detected    |
| 2876 | A_23_P68851   | KREMEN1   | Hs.229335 | kringle containing transmembrane protein 1                                                | Homo sapiens kringle containing transmembrane protein 1 (KREMEN1), transcript variant 3, mRNA [NM_001039570]                                           | 2.28835 | up | 2.24760 | up | 6949.47200  | 3144.57540  | 7645.68850  | 2999.59180  | Detected | Detected    | Detected    | Detected    |
| 2877 | A_33_P3223860 |           |           |                                                                                           |                                                                                                                                                        | 2.28737 | up | 2.27339 | up | 40.32455    | 18.25436    | 13.09129    | 5.07779     | Detected | Detected    | Detected    | Compromised |
| 2878 | A_33_P3410589 | FAM43A    | Hs.708232 | family with sequence similarity 43, member A                                              | Homo sapiens family with sequence similarity 43, member A (FAM43A), mRNA [NM_153690]                                                                   | 2.28719 | up | 2.15202 | up | 2628.71460  | 1190.07670  | 2854.00320  | 1169.43040  | Detected | Detected    | Detected    | Detected    |
| 2879 | A_24_P350644  | BAT2L     | Hs.495349 | HLA-B associated transcript 2-like                                                        | Homo sapiens HLA-B associated transcript 2-like (BAT2L), mRNA [NM_013318]                                                                              | 2.28684 | up | 2.35157 | up | 3456.32700  | 1564.99180  | 2754.58450  | 1032.91140  | Detected | Detected    | Detected    | Detected    |
| 2880 | A_23_P164057  | MFAP4     | Hs.296049 | microfibrillar-associated protein 4                                                       | Homo sapiens microfibrillar-associated protein 4 (MFAP4), mRNA [NM_002404]                                                                             | 2.28671 | up | 2.17848 | up | 29031.48400 | 13145.95300 | 28135.60500 | 11388.54700 | Detected | Detected    | Detected    | Detected    |
| 2881 | A_23_P146367  | C9orf89   | Hs.434213 | chromosome 9 open reading frame 89                                                        | Homo sapiens chromosome 9 open reading frame 89 (C9orf89), mRNA [NM_032310]                                                                            | 2.28666 | up | 2.05670 | up | 63335.78000 | 28680.07600 | 54753.35500 | 23475.03700 | Detected | Detected    | Detected    | Detected    |
| 2882 | A_24_P941912  | DTXL      | Hs.518201 | deltex 3-like (Drosophila)                                                                | Homo sapiens dextex 3-like (Drosophila) (DTXL), mRNA [NM_138287]                                                                                       | 2.28599 | up | 2.53797 | up | 175.87788   | 79.66542    | 182.67537   | 63.46859    | Detected | Detected    | Detected    | Detected    |
| 2883 | A_33_P3464555 | LOC283070 | Hs.600547 | hypothetical LOC283070                                                                    | Homo sapiens hypothetical LOC283070 (LOC283070), non-coding RNA [NR_027322]                                                                            | 2.28472 | up | 2.54870 | up | 168.94470   | 76.56745    | 132.18161   | 45.73171    | Detected | Detected    | Detected    | Detected    |
| 2884 | A_24_P132008  | MSX2      | Hs.89404  | msh homeobox 2                                                                            | Homo sapiens msh homeobox 2 (MSX2), mRNA [NM_002449]                                                                                                   | 2.28395 | up | 5.34033 | up | 43.29592    | 19.62881    | 44.62740    | 7.36884     | Detected | Detected    | Detected    | Compromised |
| 2885 | A_23_P57417   | MMP11     | Hs.143751 | matrix metalloproteinase 11 (stromelysin 3)                                               | Homo sapiens matrix metalloproteinase 11 (stromelysin 3) (MMP11), mRNA [NM_005940]                                                                     | 2.28351 | up | 2.24067 | up | 1174.13220  | 532.41205   | 1062.87610  | 418.28280   | Detected | Detected    | Detected    | Detected    |
| 2886 | A_23_P218068  | PLEKHA5   | Hs.188614 | pleckstrin homology domain containing, family A member 5                                  | Homo sapiens pleckstrin homology domain containing, family A member 5 (PLEKHA5), transcript variant 1, mRNA [NM_019012]                                | 2.28338 | up | 2.60868 | up | 1765.97270  | 800.82635   | 899.38184   | 304.01047   | Detected | Detected    | Detected    | Detected    |
| 2887 | A_33_P3327608 | EML6      | Hs.656692 | echinoderm microtubule associated protein like 6                                          | Homo sapiens echinoderm microtubule associated protein like 6 (EML6), mRNA [NM_001039753]                                                              | 2.28242 | up | 2.47871 | up | 23.31490    | 10.57721    | 15.98530    | 5.68671     | Detected | Compromised | Detected    | Compromised |
| 2888 | A_33_P3254013 |           |           |                                                                                           | Cyclin G-associated kinase (EC 2.7.11.1) [Source:UniProtKB/Swiss-Prot;Acc:O14976] [ENST00000382997]                                                    | 2.28228 | up | 2.89297 | up | 84.68058    | 38.41922    | 76.36857    | 23.27752    | Detected | Detected    | Detected    | Detected    |
| 2889 | A_32_P232214  | LOC388630 | Hs.576171 | UPF0632 protein A                                                                         | PREDICTED: Homo sapiens UPF0632 protein A (LOC388630), mRNA [XM_371250]                                                                                | 2.28197 | up | 2.05044 | up | 303.16843   | 137.56499   | 271.82680   | 116.89892   | Detected | Detected    | Detected    | Detected    |
| 2890 | A_33_P3493097 | LOC648149 | Hs.658840 | hypothetical protein LOC648149                                                            | Homo sapiens cDNA FLJ41355 fis, clone BRAWH2016724, [AK123349]                                                                                         | 2.28181 | up | 6.48182 | up | 53.79231    | 24.41031    | 32.41031    | 4.40912     | Detected | Detected    | Detected    | Compromised |
| 2891 | A_33_P3305203 | LOC283588 | Hs.46519  | hypothetical LOC283588                                                                    | PREDICTED: Homo sapiens hypothetical LOC283588 (LOC283588), miscRNA [XR_041539]                                                                        | 2.28170 | up | 4.09758 | up | 109.82087   | 49.83778    | 49.59884    | 10.67357    | Detected | Detected    | Detected    | Compromised |
| 2892 | A_33_P3288189 | RHOBTB3   | Hs.445030 | Rho-related BTB domain containing 3                                                       | Homo sapiens Rho-related BTB domain containing 3 (RHOBTB3), mRNA [NM_014889]                                                                           | 2.28078 | up | 2.46559 | up | 2082.69900  | 945.53300   | 1852.28960  | 662.45090   | Detected | Detected    | Detected    | Detected    |
| 2893 | A_33_P3413989 | SERPING1  | Hs.384598 | serpin peptidase inhibitor, clade G (C1 inhibitor), member 1                              | Homo sapiens serpin peptidase inhibitor, clade G (C1 inhibitor), member 1 (SERPING1), transcript variant 1, mRNA [NM_000062]                           | 2.28065 | up | 1.94335 | up | 445.77234   | 202.38931   | 437.75568   | 198.63026   | Detected | Detected    | Detected    | Detected    |
| 2894 | A_24_P48495   | LYPD3     | Hs.631594 | LY6/PLAUR domain containing 3                                                             | Homo sapiens LY6/PLAUR domain containing 3 (LYPD3), mRNA [NM_014400]                                                                                   | 2.28026 | up | 1.71005 | up | 28.99650    | 13.16721    | 37.46451    | 19.31863    | Detected | Compromised | Detected    | Detected    |
| 2895 | A_32_P88310   | LOC730183 | Hs.620916 | hypothetical protein LOC730183                                                            | PREDICTED: Homo sapiens hypothetical LOC730183 (LOC730183), mRNA [XM_001714997]                                                                        | 2.27974 | up | 2.05525 | up | 653.70250   | 296.91150   | 602.06885   | 258.31354   | Detected | Detected    | Detected    | Detected    |
| 2896 | A_23_P111000  | PSMB9     | Hs.654585 | proteasome (prosome, macropain) subunit, beta type, 9 (large multifunctional peptidase 2) | Homo sapiens proteasome (prosome, macropain) subunit, beta type, 9 (large multifunctional peptidase 2) (PSMB9), transcript variant 1, mRNA [NM_002800] | 2.27952 | up | 3.30054 | up | 3037.46310  | 1379.74900  | 3415.92580  | 912.61786   | Detected | Detected    | Detected    | Detected    |
| 2897 | A_33_P3527721 | LOC284219 | Hs.657510 | hypothetical protein LOC284219                                                            | Homo sapiens cDNA FLJ37117 fis, clone BRACE2022270 [AK094436]                                                                                          | 2.27912 | up | 2.35162 | up | 1370.09680  | 622.46790   | 962.72327   | 360.99387   | Detected | Detected    | Detected    | Detected    |
| 2898 | A_23_P373054  | C3orf23   | Hs.55131  | chromosome 3 open reading frame 23                                                        | Homo sapiens chromosome 3 open reading frame 23 (C3orf23), transcript variant 1, mRNA [NM_173826]                                                      | 2.27822 | up | 2.21739 | up | 686.48770   | 312.01053   | 441.92178   | 175.73918   | Detected | Detected    | Detected    | Detected    |

|      |               |              |           |                                                                                  |                                                                                                                                                                                               |         |    |         |    |             |             |             |            |             |             |             |             |
|------|---------------|--------------|-----------|----------------------------------------------------------------------------------|-----------------------------------------------------------------------------------------------------------------------------------------------------------------------------------------------|---------|----|---------|----|-------------|-------------|-------------|------------|-------------|-------------|-------------|-------------|
| 2899 | A_24_P148717  | COR1         | Hs.301921 | chemokine (C-C motif) receptor 1                                                 | Homo sapiens chemokine (C-C motif) receptor 1 (COR1), mRNA [NM_001295]                                                                                                                        | 2.27805 | up | 3.17903 | up | 141.22101   | 64.19022    | 76.88025    | 21.32484   | Detected    | Detected    | Detected    | Detected    |
| 2900 | A_24_P56363   | CAB39L       | Hs.87159  | calcium binding protein 39-like                                                  | Homo sapiens calcium binding protein 39-like (CAB39L), transcript variant 1, mRNA [NM_030925]                                                                                                 | 2.27759 | up | 1.90541 | up | 621.12384   | 282.38162   | 502.12936   | 232.37637  | Detected    | Detected    | Detected    | Detected    |
| 2901 | A_23_P207507  | ABCC3        | Hs.463421 | ATP-binding cassette, sub-family C (CFTR/MRP), member 3                          | Homo sapiens ATP-binding cassette, sub-family C (CFTR/MRP), member 3 (ABCC3), transcript variant 1, mRNA [NM_003786]                                                                          | 2.27726 | up | 2.40103 | up | 3835.07930  | 1743.79280  | 3221.24220  | 1183.01670 | Detected    | Detected    | Detected    | Detected    |
| 2902 | A_23_P36345   | STARD10      | Hs.188606 | StAR-related lipid transfer (START) domain containing 10                         | Homo sapiens StAR-related lipid transfer (START) domain containing 10 (STARD10), mRNA [NM_006645]                                                                                             | 2.27601 | up | 2.21549 | up | 758.61220   | 345.12747   | 833.33075   | 331.67526  | Detected    | Detected    | Detected    | Detected    |
| 2903 | A_23_P55936   | FCGRT        | Hs.111903 | Fc fragment of IgG, receptor, transporter, alpha                                 | Homo sapiens Fc fragment of IgG, receptor, transporter, alpha (FCGRT), transcript variant 2, mRNA [NM_004107]                                                                                 | 2.27546 | up | 2.25756 | up | 23787.28300 | 10824.50800 | 22535.41800 | 8802.19800 | Detected    | Detected    | Detected    | Detected    |
| 2904 | A_33_P3402823 | SPIN3        | Hs.522672 | spindlin family, member 3                                                        | Homo sapiens spindlin family, member 3 (SPIN3), transcript variant 1, mRNA [NM_001010862]                                                                                                     | 2.27506 | up | 1.30840 | up | 16.07388    | 7.31579     | 20.78083    | 14.00519   | Detected    | Compromised | Detected    | Compromised |
| 2905 | A_23_P300076  | IQCG         | Hs.591675 | IQ motif containing G                                                            | Homo sapiens IQ motif containing G (IQCG), transcript variant 1, mRNA [NM_032263]                                                                                                             | 2.27445 | up | 2.45931 | up | 100.42143   | 45.71759    | 89.66157    | 32.14840   | Detected    | Detected    | Detected    | Detected    |
| 2906 | A_33_P3777207 | MMEL1        | Hs.591453 | membrane metallo-endopeptidase-like 1                                            | Homo sapiens membrane metallo-endopeptidase-like 1 (MMEL1), mRNA [NM_033467]                                                                                                                  | 2.27412 | up | 1.20742 | up | 25.19880    | 11.47360    | 9.61180     | 7.01962    | Detected    | Compromised | Compromised | Compromised |
| 2907 | A_33_P3337977 |              |           |                                                                                  | Polyphosphoinositide phosphatase (EC 3.1.3.-)(Phosphatidylinositol 3,5-bisphosphate 5-phosphatase)(SAC domain-containing protein 3) [Source:UniProtKB/Swiss-Prot;Acc:Q82562][ENST00000368941] | 2.27387 | up | 2.15965 | up | 294.17154   | 133.95810   | 183.86224   | 75.07153   | Detected    | Detected    | Detected    | Detected    |
| 2908 | A_23_P200780  | TGFBR3       | Hs.482390 | transforming growth factor, beta receptor III                                    | Homo sapiens transforming growth factor, beta receptor III (TGFBR3), mRNA [NM_003243]                                                                                                         | 2.27364 | up | 2.23966 | up | 1267.44950  | 577.22150   | 1232.22560  | 485.14740  | Detected    | Detected    | Detected    | Detected    |
| 2909 | A_24_P942211  | RP11-345P4.4 | Hs.655255 | similar to solute carrier family 35, member E2                                   | Homo sapiens similar to solute carrier family 35, member E2 (LOC728661), mRNA [NM_001110781]                                                                                                  | 2.27357 | up | 2.30891 | up | 6403.00830  | 2916.14300  | 6235.51800  | 2381.39500 | Detected    | Detected    | Detected    | Detected    |
| 2910 | A_23_P119857  | TTC32        | Hs.591547 | tetratricopeptide repeat domain 32                                               | Homo sapiens tetratricopeptide repeat domain 32 (TTC32), mRNA [NM_001008237]                                                                                                                  | 2.27288 | up | 2.39441 | up | 4784.26300  | 2179.57100  | 3509.95750  | 1292.61660 | Detected    | Detected    | Detected    | Detected    |
| 2911 | A_33_P3334515 | NDRG2        | Hs.525205 | NDRG family member 2                                                             | Homo sapiens NDRG family member 2 (NDRG2), transcript variant 1, mRNA [NM_201535]                                                                                                             | 2.27274 | up | 2.66392 | up | 2472.27030  | 1126.36510  | 1646.85220  | 545.12800  | Detected    | Detected    | Detected    | Detected    |
| 2912 | A_24_P116805  | STAT3        | Hs.463059 | signal transducer and activator of transcription 3 (acute-phase response factor) | Homo sapiens signal transducer and activator of transcription 3 (acute-phase response factor) (STAT3), transcript variant 3, mRNA [NM_213662]                                                 | 2.27244 | up | 1.77159 | up | 1370.47530  | 624.47090   | 847.36410   | 421.76620  | Detected    | Detected    | Detected    | Detected    |
| 2913 | A_23_P61760   | QKI          | Hs.510324 | quaking homolog, KH domain RNA binding (mouse)                                   | Homo sapiens quaking homolog, KH domain RNA binding (mouse) (QKI), transcript variant 1, mRNA [NM_006775]                                                                                     | 2.27178 | up | 2.26452 | up | 108.17091   | 49.30340    | 46.78173    | 18.21651   | Detected    | Detected    | Detected    | Detected    |
| 2914 | A_23_P4489    | NETO1        | Hs.465407 | neuropilin (NRP) and tolloid (TLL)-like 1                                        | Homo sapiens neuropilin (NRP) and tolloid (TLL)-like 1 (NETO1), transcript variant 3, mRNA [NM_138966]                                                                                        | 2.27120 | up | 3.91147 | up | 145.75449   | 66.45059    | 157.37918   | 35.47916   | Detected    | Detected    | Detected    | Detected    |
| 2915 | A_33_P3283044 | KIAA0802     | Hs.650822 | KIAA0802                                                                         | Homo sapiens KIAA0802 (KIAA0802), mRNA [NM_015210]                                                                                                                                            | 2.27110 | up | 2.12552 | up | 406.41183   | 185.29498   | 282.10233   | 117.03249  | Detected    | Detected    | Detected    | Detected    |
| 2916 | A_24_P189739  | DUSP16       | Hs.536535 | dual specificity phosphatase 16                                                  | Homo sapiens dual specificity phosphatase 16 (DUSP16), mRNA [NM_030640]                                                                                                                       | 2.27100 | up | 1.40204 | up | 57.12756    | 26.04725    | 64.82778    | 40.77245   | Detected    | Detected    | Detected    | Detected    |
| 2917 | A_33_P3327592 | RNF13        | Hs.12333  | ring finger protein 13                                                           | Homo sapiens ring finger protein 13 (RNF13), transcript variant 1, mRNA [NM_007282]                                                                                                           | 2.27061 | up | 2.20292 | up | 15010.57400 | 6845.23240  | 7842.13000  | 3139.07570 | Detected    | Detected    | Detected    | Detected    |
| 2918 | A_33_P3413468 | EDA2R        | Hs.302017 | ectodysplasin A2 receptor                                                        | Homo sapiens ectodysplasin A2 receptor (EDA2R), mRNA [NM_021783]                                                                                                                              | 2.27035 | up | 2.36765 | up | 2954.96220  | 1347.69590  | 2415.00120  | 899.42460  | Detected    | Detected    | Detected    | Detected    |
| 2919 | A_24_P42436   | RICS         | Hs.440379 | Rho GTPase-activating protein                                                    | Homo sapiens Rho GTPase-activating protein (RICS), transcript variant 2, mRNA [NM_014715]                                                                                                     | 2.27030 | up | 1.90146 | up | 34.13775    | 15.56983    | 28.13359    | 13.04677   | Detected    | Detected    | Detected    | Detected    |
| 2920 | A_23_P415633  | FLJ25006     | Hs.657973 | uncharacterized serine/threonine-protein kinase Sgk494                           | Homo sapiens uncharacterized serine/threonine-protein kinase Sgk494 (FLJ25006), mRNA [NM_144610]                                                                                              | 2.27028 | up | 3.21351 | up | 94.66159    | 43.17448    | 92.44334    | 25.36659   | Detected    | Detected    | Detected    | Detected    |
| 2921 | A_23_P139123  | SERPING1     | Hs.384598 | serpin peptidase inhibitor, clade G (C1 inhibitor), member 1                     | Homo sapiens serpin peptidase inhibitor, clade G (C1 inhibitor), member 1 (SERPING1), transcript variant 1, mRNA [NM_000062]                                                                  | 2.26975 | up | 2.01584 | up | 2228.46390  | 1016.62680  | 1566.13440  | 685.07510  | Detected    | Detected    | Detected    | Detected    |
| 2922 | A_33_P3210468 | MATN4        | Hs.278489 | matrilin 4                                                                       | Homo sapiens matrilin 4 (MATN4), transcript variant 1, mRNA [NM_003833]                                                                                                                       | 2.26882 | up | 1.48242 | up | 10.97351    | 5.00817     | 15.16150    | 9.01856    | Compromised | Compromised | Detected    | Compromised |
| 2923 | A_33_P3221055 |              |           |                                                                                  |                                                                                                                                                                                               | 2.26852 | up | 1.69482 | up | 32.18138    | 14.68908    | 14.12771    | 7.35045    | Detected    | Compromised | Compromised | Compromised |
| 2924 | A_23_P62967   | DISC1        | Hs.13318  | disrupted in schizophrenia 1                                                     | Homo sapiens disrupted in schizophrenia 1 (DISC1), transcript variant L, mRNA [NM_018662]                                                                                                     | 2.26624 | up | 2.34540 | up | 494.50803   | 225.94347   | 386.41428   | 145.27892  | Detected    | Detected    | Detected    | Detected    |
| 2925 | A_33_P3215739 | LNP1         | Hs.591294 | leukemia NUP98 fusion partner 1                                                  | Homo sapiens leukemia NUP98 fusion partner 1 (LNP1), mRNA [NM_001085451]                                                                                                                      | 2.26605 | up | 2.30439 | up | 494.85953   | 226.12366   | 454.12190   | 173.77293  | Detected    | Detected    | Detected    | Detected    |
| 2926 | A_23_P108376  | THADA        | Hs.369592 | thyroid adenoma associated                                                       | Homo sapiens thyroid adenoma associated (THADA), transcript variant 1, mRNA [NM_022065]                                                                                                       | 2.26593 | up | 2.24361 | up | 2281.72850  | 1042.67750  | 1880.75370  | 739.17820  | Detected    | Detected    | Detected    | Detected    |

|      |               |           |           |                                                                                             |                                                                                                                                                                                                                                                                                                                                                                                                                                                                                                                                                                                                                                                                                                                                                                                                                                                        |         |    |         |    |            |            |            |            |          |             |          |             |
|------|---------------|-----------|-----------|---------------------------------------------------------------------------------------------|--------------------------------------------------------------------------------------------------------------------------------------------------------------------------------------------------------------------------------------------------------------------------------------------------------------------------------------------------------------------------------------------------------------------------------------------------------------------------------------------------------------------------------------------------------------------------------------------------------------------------------------------------------------------------------------------------------------------------------------------------------------------------------------------------------------------------------------------------------|---------|----|---------|----|------------|------------|------------|------------|----------|-------------|----------|-------------|
| 2927 | A_24_P233960  | SNX27     | Hs.192326 | sorting nexin family member 27                                                              | Homo sapiens sorting nexin family member 27 (SNX27), mRNA [NM_030918]                                                                                                                                                                                                                                                                                                                                                                                                                                                                                                                                                                                                                                                                                                                                                                                  | 2.26505 | up | 2.24386 | up | 2915.12920 | 1332.64110 | 2500.64580 | 982.70184  | Detected | Detected    | Detected | Detected    |
| 2928 | A_23_P356004  | KCNIP3    | Hs.437376 | Kv channel interacting protein 3, calstegenin                                               | Homo sapiens Kv channel interacting protein 3, calstegenin (KCNIP3), transcript variant 1, mRNA [NM_013434]                                                                                                                                                                                                                                                                                                                                                                                                                                                                                                                                                                                                                                                                                                                                            | 2.26496 | up | 1.99777 | up | 8600.85700 | 3932.01320 | 7498.34470 | 3309.68290 | Detected | Detected    | Detected | Detected    |
| 2929 | A_33_P3263538 | NEAT1     | Hs.523789 | nuclear paraspeckle assembly transcript 1 (non-protein coding)                              | Human MEN1 region clone epsilon (AF001893)                                                                                                                                                                                                                                                                                                                                                                                                                                                                                                                                                                                                                                                                                                                                                                                                             | 2.26483 | up | 2.34536 | up | 2225.13840 | 1017.31180 | 1626.49000 | 611.51560  | Detected | Detected    | Detected | Detected    |
| 2930 | A_23_P131825  | TNNC2     | Hs.182421 | troponin C type 2 (fast)                                                                    | Homo sapiens troponin C type 2 (fast) (TNNC2), mRNA [NM_003279]                                                                                                                                                                                                                                                                                                                                                                                                                                                                                                                                                                                                                                                                                                                                                                                        | 2.26448 | up | 2.51029 | up | 262.35016  | 119.96271  | 222.99648  | 78.33204   | Detected | Detected    | Detected | Detected    |
| 2931 | A_23_P418485  | C11orf65  | Hs.653180 | chromosome 11 open reading frame 65                                                         | Homo sapiens chromosome 11 open reading frame 65 (C11orf65), mRNA [NM_152587]                                                                                                                                                                                                                                                                                                                                                                                                                                                                                                                                                                                                                                                                                                                                                                          | 2.26420 | up | 2.41272 | up | 95.74947   | 43.78801   | 97.70359   | 35.70824   | Detected | Detected    | Detected | Detected    |
| 2932 | A_24_P18146   | PSD3      | Hs.434255 | pleckstrin and Sec7 domain containing 3                                                     | Homo sapiens pleckstrin and Sec7 domain containing 3 (PSD3), transcript variant 1, mRNA [NM_015310]                                                                                                                                                                                                                                                                                                                                                                                                                                                                                                                                                                                                                                                                                                                                                    | 2.26382 | up | 2.53132 | up | 1151.25830 | 526.57904  | 820.00680  | 285.65080  | Detected | Detected    | Detected | Detected    |
| 2933 | A_23_P147711  | NPR1      | Hs.490330 | natriuretic peptide receptor A/guanylate cyclase A (atrialnatriuretic peptide receptor A)   | Homo sapiens natriuretic peptide receptor A/guanylate cyclase A (atrialnatriuretic peptide receptor A) (NPR1), mRNA [NM_009096]                                                                                                                                                                                                                                                                                                                                                                                                                                                                                                                                                                                                                                                                                                                        | 2.26306 | up | 3.33545 | up | 174.77946  | 79.96999   | 87.42018   | 23.11125   | Detected | Detected    | Detected | Detected    |
| 2934 | A_33_P3373765 | DRD4      | Hs.99922  | dopamine receptor D4                                                                        | Homo sapiens dopamine receptor D4 (DRD4), mRNA [NM_000797]                                                                                                                                                                                                                                                                                                                                                                                                                                                                                                                                                                                                                                                                                                                                                                                             | 2.26262 | up | 2.35251 | up | 181.08372  | 82.87054   | 133.36740  | 49.99016   | Detected | Detected    | Detected | Detected    |
| 2935 | A_23_P1492    | AVP11     | Hs.23918  | arginine vasopressin-induced 1                                                              | Homo sapiens arginine vasopressin-induced 1 (AVP11), mRNA [NM_021732]                                                                                                                                                                                                                                                                                                                                                                                                                                                                                                                                                                                                                                                                                                                                                                                  | 2.26224 | up | 2.08933 | up | 3427.74900 | 1568.93100 | 3907.66160 | 1649.20530 | Detected | Detected    | Detected | Detected    |
| 2936 | A_23_P208961  | MUM1      | Hs.515016 | melanoma associated antigen (mutated) 1                                                     | Homo sapiens melanoma associated antigen (mutated) 1 (MUM1), transcript variant 1, mRNA [NM_032853]                                                                                                                                                                                                                                                                                                                                                                                                                                                                                                                                                                                                                                                                                                                                                    | 2.26221 | up | 2.14471 | up | 9262.38400 | 4239.58800 | 9552.49900 | 3927.48540 | Detected | Detected    | Detected | Detected    |
| 2937 | A_23_P251412  | SCGN      | Hs.116428 | secretagogin, EF-hand calcium binding protein                                               | Homo sapiens secretagogin, EF-hand calcium binding protein (SCGN), mRNA [NM_006998]                                                                                                                                                                                                                                                                                                                                                                                                                                                                                                                                                                                                                                                                                                                                                                    | 2.26188 | up | 4.49240 | up | 56.60117   | 25.91132   | 36.47100   | 7.15872    | Detected | Detected    | Detected | Compromised |
| 2938 | A_33_P3248787 | LOC729130 | Hs.692489 | hypothetical LOC729130                                                                      | PREDICTED: Homo sapiens hypothetical LOC729130 (LOC729130), mRNA [XM_001133555]                                                                                                                                                                                                                                                                                                                                                                                                                                                                                                                                                                                                                                                                                                                                                                        | 2.26123 | up | 1.81253 | up | 15.20225   | 6.96141    | 15.62283   | 7.60045    | Detected | Compromised | Detected | Compromised |
| 2939 | A_24_P842172  | LOC349196 | Hs.722381 | hypothetical LOC349196                                                                      | Homo sapiens hypothetical LOC349196 (LOC349196), non-coding RNA [NR_027000]                                                                                                                                                                                                                                                                                                                                                                                                                                                                                                                                                                                                                                                                                                                                                                            | 2.26072 | up | 2.02159 | up | 132.83391  | 60.88666   | 98.10594   | 42.79259   | Detected | Detected    | Detected | Detected    |
| 2940 | A_33_P3339253 | LOC646808 | Hs.666639 | similar to L antigen family, member 3                                                       | PREDICTED: Homo sapiens similar to L antigen family, member 3 (LOC646808), miscRNA [XR_017339]                                                                                                                                                                                                                                                                                                                                                                                                                                                                                                                                                                                                                                                                                                                                                         | 2.25902 | up | 2.35417 | up | 4410.06000 | 2021.42020 | 6387.62840 | 2392.58400 | Detected | Detected    | Detected | Detected    |
| 2941 | A_23_P148821  | DPH5      | Hs.440776 | DPH5 homolog (S. cerevisiae)                                                                | Homo sapiens DPH5 homolog (S. cerevisiae) (DPH5), transcript variant 1, mRNA [NM_001077394]                                                                                                                                                                                                                                                                                                                                                                                                                                                                                                                                                                                                                                                                                                                                                            | 2.25826 | up | 2.35777 | up | 2034.29690 | 932.76620  | 1756.72560 | 657.00530  | Detected | Detected    | Detected | Detected    |
| 2942 | A_23_P123727  | ZOCHC6    | Hs.655162 | zinc finger, CCHC domain containing 6                                                       | Homo sapiens zinc finger, CCHC domain containing 6 (ZOCHC6), mRNA [NM_024617]                                                                                                                                                                                                                                                                                                                                                                                                                                                                                                                                                                                                                                                                                                                                                                          | 2.25787 | up | 2.43306 | up | 1885.87790 | 864.86346  | 1123.71010 | 407.25546  | Detected | Detected    | Detected | Detected    |
| 2943 | A_33_P3243230 |           |           |                                                                                             | Interleukin-8 Precursor (IL-8)(C-X-C motif chemokine 8)(Monocyte-derived neutrophil chemotactic factor)(MDNCF)(T-cell chemotactic factor)(Neutrophil-activating protein 1)(NAP-1)(Protein 3-10C)(Granulocyte chemotactic protein 1)(GCP-1)(Monocyte-derived neutrophil-activating peptide)(MONAP)(Eoctakin) [Contains MDNCF-a(IL8/NAP1 form I)(GCP/IL-8 protein IV);Interleukin-8(IL-8(1-77))(MDNCF-b)(IL8/NAP1 form II)(GCP/IL-8 protein IX)(Ala-IL-8)77;IL-8(5-77);IL-8(6-77)(Lymphocyte-derived neutrophil-activating factor)(LYNAP)(Neutrophil-activating factor)(NAF)(MDNCF-c)(IL8/NAP1 form III)(GCP/IL-8 protein IX)(Ser-IL-8)72;IL-8(7-77)(IL8/NAP1 form IV)(GCP/IL-8 protein V);IL-8(8-77)(IL8/NAP1 form V)(GCP/IL-8 protein VI);IL-8(9-77)(IL8/NAP1 form VI)(GCP/IL-8 protein III) [Source:UniProtKB/Swiss-Prot;Acc:P10145] [ENST0000040931] | 2.25777 | up | 1.71879 | up | 126.76268  | 58.13602   | 95.11688   | 48.79772   | Detected | Detected    | Detected | Detected    |
| 2944 | A_33_P3240757 | IGSF3     | Hs.171057 | immunoglobulin superfamily, member 3                                                        | Homo sapiens immunoglobulin superfamily, member 3 (IGSF3), transcript variant 1, mRNA [NM_001542]                                                                                                                                                                                                                                                                                                                                                                                                                                                                                                                                                                                                                                                                                                                                                      | 2.25729 | up | 1.33064 | up | 31.93695   | 14.65003   | 17.02257   | 11.28056   | Detected | Compromised | Detected | Compromised |
| 2945 | A_33_P3358233 | NES       | Hs.527971 | nestin                                                                                      | Homo sapiens nestin (NES), mRNA [NM_006617]                                                                                                                                                                                                                                                                                                                                                                                                                                                                                                                                                                                                                                                                                                                                                                                                            | 2.25702 | up | 1.81471 | up | 710.15710  | 325.80093  | 811.58500  | 394.35944  | Detected | Detected    | Detected | Detected    |
| 2946 | A_23_P115792  | PLEKHA1   | Hs.643512 | pleckstrin homology domain containing family A (phosphoinositide binding specific) member 1 | Homo sapiens pleckstrin homology domain containing family A (phosphoinositide binding specific) member 1 (PLEKHA1), transcript variant 2, mRNA [NM_00101974]                                                                                                                                                                                                                                                                                                                                                                                                                                                                                                                                                                                                                                                                                           | 2.25696 | up | 2.04830 | up | 1977.07780 | 907.05220  | 1293.16190 | 556.70435  | Detected | Detected    | Detected | Detected    |
| 2947 | A_33_P3240094 |           |           |                                                                                             | Ephexin-1 (Eph-interacting exchange protein)(Neuronal guanine nucleotide exchange factor) [Source:UniProtKB/Swiss-Prot;Acc:Q8NVZ2] [ENST00000409079]                                                                                                                                                                                                                                                                                                                                                                                                                                                                                                                                                                                                                                                                                                   | 2.25682 | up | 1.97591 | up | 60.20647   | 27.62359   | 42.96730   | 19.17501   | Detected | Detected    | Detected | Detected    |
| 2948 | A_33_P3294089 |           |           |                                                                                             |                                                                                                                                                                                                                                                                                                                                                                                                                                                                                                                                                                                                                                                                                                                                                                                                                                                        | 2.25671 | up | 2.67934 | up | 21.35827   | 9.79993    | 25.85777   | 8.50999    | Detected | Compromised | Detected | Compromised |
| 2949 | A_33_P3354564 | GPD2      | Hs.512382 | glycerol-3-phosphate dehydrogenase 2 (mitochondrial)                                        | Homo sapiens glycerol-3-phosphate dehydrogenase 2 (mitochondrial) (GPD2), nuclear gene encoding mitochondrial protein, transcript variant 1, mRNA [NM_001083112]                                                                                                                                                                                                                                                                                                                                                                                                                                                                                                                                                                                                                                                                                       | 2.25640 | up | 2.04859 | up | 244.26308  | 112.09188  | 212.81488  | 91.60376   | Detected | Detected    | Detected | Detected    |

|      |               |           |           |                                                    |                                                                                                                                                                                                                                                                     |         |    |         |    |             |             |             |             |          |             |          |             |
|------|---------------|-----------|-----------|----------------------------------------------------|---------------------------------------------------------------------------------------------------------------------------------------------------------------------------------------------------------------------------------------------------------------------|---------|----|---------|----|-------------|-------------|-------------|-------------|----------|-------------|----------|-------------|
| 2950 | A_33_P3269779 | ZNF3      | Hs.435302 | zinc finger protein 3                              | Homo sapiens zinc finger protein 3 (ZNF3), transcript variant 1, mRNA [NM_017715]                                                                                                                                                                                   | 2.25617 | up | 1.50369 | up | 24.48342    | 11.23658    | 32.25094    | 18.91252    | Detected | Compromised | Detected | Detected    |
| 2951 | A_23_P360179  | NEURL4    | Hs.654794 | neurularized homolog 4 (Drosophila)                | Homo sapiens neurularized homolog 4 (Drosophila) (NEURL4), transcript variant 1, mRNA [NM_032442]                                                                                                                                                                   | 2.25601 | up | 1.90343 | up | 1403.54700  | 644.19730   | 1120.43620  | 519.05646   | Detected | Detected    | Detected | Detected    |
| 2952 | A_23_P390384  | ZNF630    | Hs.650883 | zinc finger protein 630                            | Homo sapiens zinc finger protein 630 (ZNF630), mRNA [NM_001037735]                                                                                                                                                                                                  | 2.25582 | up | 3.32103 | up | 430.44107   | 197.57956   | 391.71014   | 104.00582   | Detected | Detected    | Detected | Detected    |
| 2953 | A_23_P41734   | RNF130    | Hs.484363 | ring finger protein 130                            | Homo sapiens ring finger protein 130 (RNF130), mRNA [NM_018434]                                                                                                                                                                                                     | 2.25576 | up | 2.14930 | up | 7792.70200  | 3577.08400  | 5408.56300  | 2218.96630  | Detected | Detected    | Detected | Detected    |
| 2954 | A_32_P25050   | RDH10     | Hs.244940 | retinol dehydrogenase 10 (all-trans)               | Homo sapiens retinol dehydrogenase 10 (all-trans) (RDH10), mRNA [NM_172037]                                                                                                                                                                                         | 2.25527 | up | 2.54189 | up | 985.76230   | 452.59140   | 678.76117   | 235.46430   | Detected | Detected    | Detected | Detected    |
| 2955 | A_23_P126103  | CTH       | Hs.19904  | cystathionase (cystathionine gamma-lyase)          | Homo sapiens cystathionase (cystathionine gamma-lyase) (CTH), transcript variant 1, mRNA [NM_001902]                                                                                                                                                                | 2.25500 | up | 2.35423 | up | 1580.90760  | 725.92725   | 1221.60030  | 457.55790   | Detected | Detected    | Detected | Detected    |
| 2956 | A_33_P3232552 | GUCY1B3   | Hs.77890  | guanylate cyclase 1, soluble, beta 3               | Homo sapiens guanylate cyclase 1, soluble, beta 3 (GUCY1B3), mRNA [NM_000857]                                                                                                                                                                                       | 2.25480 | up | 3.57463 | up | 62.12696    | 28.53018    | 36.41146    | 8.98200     | Detected | Detected    | Detected | Compromised |
| 2957 | A_33_P3415052 | NIPAL4    | Hs.4285   | NIPA-like domain containing 4                      | Homo sapiens NIPA-like domain containing 4 (NIPAL4), mRNA [NM_001099287]                                                                                                                                                                                            | 2.25469 | up | 2.20638 | up | 150.43858   | 69.08849    | 129.04839   | 51.57492    | Detected | Detected    | Detected | Detected    |
| 2958 | A_33_P3294524 | ANKRD12   | Hs.464585 | ankyrin repeat domain 12                           | Homo sapiens ankyrin repeat domain 12 (ANKRD12), transcript variant 1, mRNA [NM_015208]                                                                                                                                                                             | 2.25442 | up | 2.20049 | up | 2269.50500  | 1042.39010  | 552.89940   | 221.56035   | Detected | Detected    | Detected | Detected    |
| 2959 | A_33_P3279681 | FLJ40125  | Hs.532872 | protein phosphatase 1B-like                        | Homo sapiens protein phosphatase 1B-like (FLJ40125), mRNA [NM_001080401]                                                                                                                                                                                            | 2.25257 | up | 2.77246 | up | 84.04996    | 38.63606    | 113.19360   | 36.00167    | Detected | Detected    | Detected | Detected    |
| 2960 | A_24_P32520   | RNF214    | Hs.591934 | ring finger protein 214                            | Homo sapiens ring finger protein 214 (RNF214), transcript variant 2, mRNA [NM_001077239]                                                                                                                                                                            | 2.25254 | up | 2.35121 | up | 621.45276   | 285.67230   | 294.99738   | 110.63473   | Detected | Detected    | Detected | Detected    |
| 2961 | A_24_P161463  | C20orf199 | Hs.356766 | chromosome 20 open reading frame 199               | Homo sapiens chromosome 20 open reading frame 199 (C20orf199), transcript variant 2, non-coding RNA [NR_003605]                                                                                                                                                     | 2.25133 | up | 2.41096 | up | 62689.36700 | 28832.90800 | 40148.71000 | 14684.11300 | Detected | Detected    | Detected | Detected    |
| 2962 | A_24_P113815  | SLC35E2   | Hs.719940 | solute carrier family 35, member E2                | Homo sapiens solute carrier family 35, member E2 (SLC35E2), mRNA [NM_182838]                                                                                                                                                                                        | 2.25114 | up | 2.28286 | up | 625.13580   | 287.54434   | 502.44147   | 194.07591   | Detected | Detected    | Detected | Detected    |
| 2963 | A_33_P3264089 | ACTR3C    | Hs.647117 | ARP3 actin-related protein 3 homolog C (yeast)     | Homo sapiens ARP3 actin-related protein 3 homolog C (yeast) (ACTR3C), transcript variant 1, mRNA [NM_001164458]                                                                                                                                                     | 2.25056 | up | 1.47470 | up | 53.51188    | 24.62030    | 32.46536    | 19.41249    | Detected | Detected    | Detected | Detected    |
| 2964 | A_33_P3221443 | ZNF254    | Hs.434406 | zinc finger protein 254                            | Homo sapiens zinc finger protein 254 (ZNF254), mRNA [NM_030282]                                                                                                                                                                                                     | 2.25012 | up | 2.32462 | up | 411.61700   | 189.41751   | 339.35052   | 128.72488   | Detected | Detected    | Detected | Detected    |
| 2965 | A_23_P124619  | S100A14   | Hs.288998 | S100 calcium binding protein A14                   | Homo sapiens S100 calcium binding protein A14 (S100A14), mRNA [NM_020672]                                                                                                                                                                                           | 2.24966 | up | 1.60653 | up | 55.32674    | 25.46544    | 33.82554    | 18.56610    | Detected | Detected    | Detected | Detected    |
| 2966 | A_33_P3270337 |           |           |                                                    | Serine/threonine-protein kinase 32C (PKE) (EC 2.7.11.1) (YANK3) [Source:UniProtKB/Swiss-Prot;Acc:Q8BUX6] [ENST00000368619]                                                                                                                                          | 2.24960 | up | 2.43693 | up | 676.98760   | 311.60860   | 669.91113   | 242.40355   | Detected | Detected    | Detected | Detected    |
| 2967 | A_33_P3314436 | FBXL17    | Hs.721914 | F-box and leucine-rich repeat protein 17           | Homo sapiens F-box and leucine-rich repeat protein 17 (FBXL17), mRNA [NM_001163315]                                                                                                                                                                                 | 2.24933 | up | 2.19633 | up | 136.69897   | 62.92830    | 83.79623    | 33.64286    | Detected | Detected    | Detected | Detected    |
| 2968 | A_32_P219520  | TNFAIP8   | Hs.656274 | tumor necrosis factor, alpha-induced protein 8     | Homo sapiens tumor necrosis factor, alpha-induced protein 8 (TNFAIP8), transcript variant 1, mRNA [NM_014350]                                                                                                                                                       | 2.24923 | up | 2.24177 | up | 2000.20590  | 920.81920   | 2081.44240  | 818.72687   | Detected | Detected    | Detected | Detected    |
| 2969 | A_33_P3347413 | PBXIP1    | Hs.505806 | pre-B-cell leukemia homeobox interacting protein 1 | Homo sapiens pre-B-cell leukemia homeobox interacting protein 1 (PBXIP1), mRNA [NM_020524]                                                                                                                                                                          | 2.24838 | up | 2.03686 | up | 270.04980   | 124.36782   | 228.69194   | 98.13870    | Detected | Detected    | Detected | Detected    |
| 2970 | A_23_P207399  | NBR1      | Hs.277721 | neighbor of BRCA1 gene 1                           | Homo sapiens neighbor of BRCA1 gene 1 (NBR1), transcript variant 2, mRNA [NM_031858]                                                                                                                                                                                | 2.24762 | up | 2.20978 | up | 21008.00000 | 9678.22200  | 19788.38900 | 7896.35940  | Detected | Detected    | Detected | Detected    |
| 2971 | A_23_P54891   | C16orf58  | Hs.9003   | chromosome 16 open reading frame 58                | Homo sapiens chromosome 16 open reading frame 58 (C16orf58), mRNA [NM_022744]                                                                                                                                                                                       | 2.24703 | up | 2.00491 | up | 2231.13300  | 1028.13610  | 2074.00370  | 912.18120   | Detected | Detected    | Detected | Detected    |
| 2972 | A_33_P3299796 |           | Hs.279881 |                                                    | Endoplasmic reticulum mannosyl-oligosaccharide 1,2-alpha-mannosidase (EC 3.2.1.113) (ER alpha-1,2-mannosidase) (Mannosidase alpha class 1B member 1) (Man9GlcNAc2-specific-processing alpha-mannosidase) [Source:UniProtKB/Swiss-Prot;Acc:Q9UKM7] [ENST00000371587] | 2.24695 | up | 1.45984 | up | 51.23203    | 23.60925    | 40.11793    | 24.23261    | Detected | Detected    | Detected | Detected    |
| 2973 | A_33_P3376644 | SEN6      | Hs.485784 | SUMO1/sentrin specific peptidase 6                 | Homo sapiens SUMO1/sentrin specific peptidase 6 (SEN6), transcript variant 1, mRNA [NM_015571]                                                                                                                                                                      | 2.24592 | up | 2.19625 | up | 235.20769   | 108.44029   | 137.85838   | 55.34997    | Detected | Detected    | Detected | Detected    |
| 2974 | A_33_P3329652 | ZFP90     | Hs.461074 | zinc finger protein 90 homolog (mouse)             | Homo sapiens zinc finger protein 90 homolog (mouse) (ZFP90), mRNA [NM_133458]                                                                                                                                                                                       | 2.24578 | up | 2.34222 | up | 4055.70730  | 1869.96350  | 2936.99560  | 1105.71100  | Detected | Detected    | Detected | Detected    |
| 2975 | A_23_P106194  | FOS       | Hs.707896 | FBJ murine osteosarcoma viral oncogene homolog     | Homo sapiens FBJ murine osteosarcoma viral oncogene homolog (FOS), mRNA [NM_005252]                                                                                                                                                                                 | 2.24550 | up | 2.18540 | up | 2280.67600  | 1051.67910  | 2165.02470  | 873.57120   | Detected | Detected    | Detected | Detected    |
| 2976 | A_23_P98248   | TRPT1     | Hs.326586 | tRNA phosphotransferase 1                          | Homo sapiens tRNA phosphotransferase 1 (TRPT1), transcript variant 1, mRNA [NM_001033678]                                                                                                                                                                           | 2.24550 | up | 2.08896 | up | 4759.54200  | 2194.75460  | 4312.33640  | 1822.06410  | Detected | Detected    | Detected | Detected    |

|      |               |           |           |                                                                                                 |                                                                                                                                                                                                                                                                                                 |         |    |         |    |             |            |             |            |          |             |             |             |
|------|---------------|-----------|-----------|-------------------------------------------------------------------------------------------------|-------------------------------------------------------------------------------------------------------------------------------------------------------------------------------------------------------------------------------------------------------------------------------------------------|---------|----|---------|----|-------------|------------|-------------|------------|----------|-------------|-------------|-------------|
| 2977 | A_24_P209171  | SH3BGR2   | Hs.302772 | SH3 domain binding glutamic acid-rich protein like 2                                            | Homo sapiens SH3 domain binding glutamic acid-rich protein like 2 (SH3BGR2), mRNA [NM_031469]                                                                                                                                                                                                   | 2.24536 | up | 2.65165 | up | 91.79768    | 42.33294   | 70.47483    | 23.43601   | Detected | Detected    | Detected    | Detected    |
| 2978 | A_23_P391926  | LPHN1     | Hs.94229  | latrophilin 1                                                                                   | Homo sapiens latrophilin 1 (LPHN1), transcript variant 1, mRNA [NM_001008701]                                                                                                                                                                                                                   | 2.24490 | up | 5.13229 | up | 320.01184   | 147.60540  | 257.91754   | 44.31344   | Detected | Detected    | Detected    | Detected    |
| 2979 | A_24_P194503  | PHKA1     | Hs.201379 | phosphorylase kinase, alpha 1 (muscle)                                                          | Homo sapiens phosphorylase kinase, alpha 1 (muscle) (PHKA1), transcript variant 1, mRNA [NM_002637]                                                                                                                                                                                             | 2.24476 | up | 2.34030 | up | 93.76606    | 43.25224   | 78.41022    | 29.54382   | Detected | Detected    | Detected    | Detected    |
| 2980 | A_33_P3217218 | AGPAT5    | Hs.624002 | 1-acylglycerol-3-phosphate O-acyltransferase 5 (lysophosphatidic acid acyltransferase, epsilon) | Homo sapiens 1-acylglycerol-3-phosphate O-acyltransferase 5 (lysophosphatidic acid acyltransferase, epsilon) (AGPAT5), mRNA [NM_018361]                                                                                                                                                         | 2.24437 | up | 2.43287 | up | 508.80077   | 234.64754  | 417.62830   | 151.36873  | Detected | Detected    | Detected    | Detected    |
| 2981 | A_33_P3414907 |           | Hs.496969 |                                                                                                 | N-acetylneuraminase lyase (NALase)/EC 4.1.3.3/(N-acetylneuraminic acid aldolase)/N-acetylneuraminic acid aldolase/N-acetylneuraminic acid aldolase/lyase/Sialic acid lyase/Sialate lyase/Sialate-pyruvate lyase/Sialic acid aldolase [Source:UniProtKB/Swiss-Prot;Acc:Q8BXD5] [ENST00000367555] | 2.24409 | up | 1.40839 | up | 118.52078   | 54.68729   | 72.95692    | 45.67825   | Detected | Detected    | Detected    | Detected    |
| 2982 | A_33_P3357332 |           | Hs.622548 |                                                                                                 | Chromosome 9 open reading frame 147 Fragment [Source:UniProtKB/TrEMBL;Acc:A2A387] [ENST00000412934]                                                                                                                                                                                             | 2.24364 | up | 1.49852 | up | 22.23703    | 10.26259   | 16.75543    | 9.85960    | Detected | Compromised | Detected    | Compromised |
| 2983 | A_33_P3780123 | FLJ33065  | Hs.660388 | hypothetical gene supported by AK057627; BC031275; BC045736                                     | Homo sapiens cDNA FLJ33065 fis. clone TRACH2000081 [AK057627]                                                                                                                                                                                                                                   | 2.24206 | up | 6.26439 | up | 31.22026    | 14.41857   | 30.98712    | 4.36182    | Detected | Compromised | Detected    | Compromised |
| 2984 | A_33_P3221293 | DFNA5     | Hs.520708 | deafness, autosomal dominant 5                                                                  | Homo sapiens deafness, autosomal dominant 5 (DFNA5), transcript variant 1, mRNA [NM_004403]                                                                                                                                                                                                     | 2.24185 | up | 2.12199 | up | 1045.69180  | 482.98080  | 1052.65770  | 437.43054  | Detected | Detected    | Detected    | Detected    |
| 2985 | A_33_P3618960 | P2RX6     | Hs.113275 | purinergic receptor P2X, ligand-gated ion channel, 6                                            | Homo sapiens purinergic receptor P2X, ligand-gated ion channel, 6 (P2RX6), transcript variant 1, mRNA [NM_005446]                                                                                                                                                                               | 2.24167 | up | 2.50177 | up | 13.52781    | 6.24869    | 7.15953     | 2.52350    | Detected | Compromised | Compromised | Compromised |
| 2986 | A_33_P3321347 | LOC388849 | Hs.454905 | similar to hCG1732289                                                                           | PREDICTED: Homo sapiens similar to hCG1732289 (LOC388849), mRNA [XM_373945]                                                                                                                                                                                                                     | 2.24144 | up | 2.56376 | up | 26.19149    | 12.09945   | 34.03787    | 11.70712   | Detected | Compromised | Detected    | Compromised |
| 2987 | A_33_P3659678 | NR6A1     | Hs.20131  | nuclear receptor subfamily 6, group A, member 1                                                 | Nuclear receptor subfamily 6 group A member 1 (Germ cell nuclear factor)/GCNF(hGNF)/Retinoid receptor-related testis-specific receptor(RTR)(RTR) [Source:UniProtKB/Swiss-Prot;Acc:Q15406] [ENST00000487099]                                                                                     | 2.24140 | up | 1.95913 | up | 141.00230   | 65.13892   | 106.16740   | 47.78513   | Detected | Detected    | Detected    | Detected    |
| 2988 | A_23_P103601  | MAN1C1    | Hs.197043 | mannosidase, alpha, class 1C, member 1                                                          | Homo sapiens mannosidase, alpha, class 1C, member 1 (MAN1C1), mRNA [NM_020379]                                                                                                                                                                                                                  | 2.24122 | up | 2.42996 | up | 534.25380   | 246.82867  | 354.27810   | 128.56140  | Detected | Detected    | Detected    | Detected    |
| 2989 | A_23_P373763  | LAGE3     | Hs.444619 | L antigen family, member 3                                                                      | Homo sapiens L antigen family, member 3 (LAGE3), mRNA [NM_006014]                                                                                                                                                                                                                               | 2.24104 | up | 2.10311 | up | 13789.73800 | 6371.45560 | 15405.13100 | 6459.05470 | Detected | Detected    | Detected    | Detected    |
| 2990 | A_23_P377245  |           | Hs.533986 |                                                                                                 | Homo sapiens zinc finger, MYM-type 6, mRNA (cDNA clone IMAGE:5455214). [BC042172]                                                                                                                                                                                                               | 2.24095 | up | 2.77201 | up | 397.33510   | 183.59372  | 168.12486   | 53.48137   | Detected | Detected    | Detected    | Detected    |
| 2991 | A_33_P3402963 | DPRX      | Hs.579941 | divergent-paired related homeobox                                                               | Homo sapiens divergent-paired related homeobox (DPRX), mRNA [NM_001012728]                                                                                                                                                                                                                      | 2.24080 | up | 1.56618 | up | 370.57648   | 171.24069  | 37.38526    | 21.04859   | Detected | Detected    | Detected    | Detected    |
| 2992 | A_33_P3289561 |           |           |                                                                                                 | Putative uncharacterized protein C1orf134 Precursor [Source:UniProtKB/Swiss-Prot;Acc:Q5TEV5] [ENST00000375605]                                                                                                                                                                                  | 2.24008 | up | 2.29570 | up | 640.44855   | 296.04270  | 630.01904   | 241.99345  | Detected | Detected    | Detected    | Detected    |
| 2993 | A_24_P316257  | NHLRC4    | Hs.664267 | NHL repeat containing 4                                                                         | Homo sapiens NHL repeat containing 4 (NHLRC4), mRNA [NM_176677]                                                                                                                                                                                                                                 | 2.23996 | up | 2.19629 | up | 411.54626   | 190.24414  | 237.81436   | 95.48046   | Detected | Detected    | Detected    | Detected    |
| 2994 | A_33_P3336587 | LOC283710 | Hs.591097 | hypothetical LOC283710                                                                          | PREDICTED: Homo sapiens hypothetical LOC283710 (LOC283710), mRNA [XM_211174]                                                                                                                                                                                                                    | 2.23921 | up | 1.80272 | up | 112.04903   | 51.81383   | 12.65105    | 6.18818    | Detected | Detected    | Compromised | Compromised |
| 2995 | A_24_P873659  | MALAT1    | Hs.621695 | metastasis associated lung adenocarcinoma transcript 1 (non-protein coding)                     | Homo sapiens metastasis associated lung adenocarcinoma transcript 1 (non-protein coding) (MALAT1), non-coding RNA [NR_002819]                                                                                                                                                                   | 2.23810 | up | 1.76194 | up | 2071.52640  | 958.39350  | 1346.49560  | 673.87335  | Detected | Detected    | Detected    | Detected    |
| 2996 | A_23_P151614  | PSME1     | Hs.75348  | proteasome (prosome, macropain) activator subunit 1 (PA28 alpha)                                | Homo sapiens proteasome (prosome, macropain) activator subunit 1 (PA28 alpha) (PSME1), transcript variant 1, mRNA [NM_006263]                                                                                                                                                                   | 2.23780 | up | 2.13571 | up | 1137.43270  | 526.30414  | 1033.87520  | 426.86627  | Detected | Detected    | Detected    | Detected    |
| 2997 | A_23_P106737  | LUC7L     | Hs.16803  | LUC7-like (S. cerevisiae)                                                                       | Homo sapiens LUC7-like (S. cerevisiae) (LUC7L), transcript variant 2, mRNA [NM_201412]                                                                                                                                                                                                          | 2.23691 | up | 2.15649 | up | 916.90875   | 424.43497  | 614.36890   | 251.21625  | Detected | Detected    | Detected    | Detected    |
| 2998 | A_33_P3303146 | ATG4C     | Hs.7353   | ATG4 autophagy related 4 homolog C (S. cerevisiae)                                              | Homo sapiens ATG4 autophagy related 4 homolog C (S. cerevisiae) (ATG4C), transcript variant 7, mRNA [NM_032852]                                                                                                                                                                                 | 2.23610 | up | 2.41600 | up | 513.85535   | 237.94633  | 121.32635   | 44.28156   | Detected | Detected    | Detected    | Detected    |
| 2999 | A_23_P415021  | METTL7A   | Hs.655369 | methyltransferase like 7A                                                                       | Homo sapiens methyltransferase like 7A (METTL7A), mRNA [NM_014033]                                                                                                                                                                                                                              | 2.23603 | up | 2.52943 | up | 4703.52250  | 2178.10620 | 4439.85200  | 1547.78800 | Detected | Detected    | Detected    | Detected    |
| 3000 | A_33_P3318971 | C12orf72  | Hs.585084 | chromosome 12 open reading frame 72                                                             | UPF0516 protein C12orf72 [Source:UniProtKB/Swiss-Prot;Acc:Q8IXQ9] [ENST00000357721]                                                                                                                                                                                                             | 2.23586 | up | 3.93436 | up | 82.15444    | 38.04686   | 56.51485    | 12.66644   | Detected | Detected    | Detected    | Compromised |
| 3001 | A_33_P3223097 | C1orf97   | Hs.523932 | chromosome 1 open reading frame 97                                                              | Homo sapiens chromosome 1 open reading frame 97 (C1orf97), non-coding RNA [NR_026761]                                                                                                                                                                                                           | 2.23496 | up | 2.51177 | up | 798.95514   | 370.15735  | 1010.64660  | 354.80050  | Detected | Detected    | Detected    | Detected    |

|      |               |              |           |                                                                                                   |                                                                                                                                                                  |         |    |         |    |             |            |             |            |          |             |             |             |
|------|---------------|--------------|-----------|---------------------------------------------------------------------------------------------------|------------------------------------------------------------------------------------------------------------------------------------------------------------------|---------|----|---------|----|-------------|------------|-------------|------------|----------|-------------|-------------|-------------|
| 3002 | A_24_P294851  | TRIM38       | Hs.584851 | tripartite motif-containing 38                                                                    | Homo sapiens tripartite motif-containing 38 (TRIM38), mRNA [NM_006355]                                                                                           | 2.23464 | up | 2.65115 | up | 412.10513   | 190.95593  | 268.54150   | 89.31876   | Detected | Detected    | Detected    | Detected    |
| 3003 | A_32_P357301  | PPHLN1       | Hs.444157 | periphilin 1                                                                                      | Homo sapiens periphilin 1 (PPHLN1), transcript variant 1, mRNA [NM_016488]                                                                                       | 2.23454 | up | 1.94083 | up | 56.23978    | 26.06089   | 49.69147    | 22.57664   | Detected | Detected    | Detected    | Detected    |
| 3004 | A_24_P38754   | CISD1        | Hs.370102 | CDGSH iron sulfur domain 1                                                                        | Homo sapiens CDGSH iron sulfur domain 1 (CISD1), mRNA [NM_018464]                                                                                                | 2.23414 | up | 2.40357 | up | 301.38885   | 139.68495  | 230.12263   | 84.42440   | Detected | Detected    | Detected    | Detected    |
| 3005 | A_23_P136909  | HMGNS        | Hs.282204 | high-mobility group nucleosome binding domain 5                                                   | Homo sapiens high-mobility group nucleosome binding domain 5 (HMGNS), mRNA [NM_030763]                                                                           | 2.23411 | up | 2.24716 | up | 521.52590   | 241.71542  | 423.56525   | 166.20770  | Detected | Detected    | Detected    | Detected    |
| 3006 | A_33_P3544880 | LOC142937    | Hs.679824 | hypothetical protein BC008131                                                                     | Homo sapiens cDNA clone IMAGE:3454038, [BC008131]                                                                                                                | 2.23317 | up | 3.07184 | up | 38.48625    | 17.84503   | 38.84824    | 11.15162   | Detected | Detected    | Detected    | Compromised |
| 3007 | A_33_P3231923 |              | Hs.570209 |                                                                                                   | Putative uncharacterized protein ENSP00000387129 [Source:UniProtKB/TrEMBL;Acc:Q96M04] [ENST00000409590]                                                          | 2.23245 | up | 2.86277 | up | 3553.63350  | 1648.25710 | 359.68760   | 110.79108  | Detected | Detected    | Detected    | Detected    |
| 3008 | A_23_P36753   | ALDH2        | Hs.632733 | aldehyde dehydrogenase 2 family (mitochondrial)                                                   | Homo sapiens aldehyde dehydrogenase 2 family (mitochondrial) (ALDH2), nuclear gene encoding mitochondrial protein, mRNA [NM_000690]                              | 2.23205 | up | 2.20203 | up | 3637.57230  | 1687.49210 | 2814.30300  | 1126.97280 | Detected | Detected    | Detected    | Detected    |
| 3009 | A_33_P3411090 | ADAL         | Hs.533913 | adenosine deaminase-like                                                                          | Homo sapiens adenosine deaminase-like (ADAL), transcript variant 2, mRNA [NM_001012969]                                                                          | 2.23178 | up | 2.36839 | up | 794.97076   | 368.83545  | 638.23950   | 237.62712  | Detected | Detected    | Detected    | Detected    |
| 3010 | A_24_P68819   | KLRAQ1       | Hs.654619 | KLRAQ motif containing 1                                                                          | Homo sapiens KLRAQ motif containing 1 (KLRAQ1), transcript variant 2, mRNA [NM_152994]                                                                           | 2.23174 | up | 2.49256 | up | 1947.13780  | 903.41455  | 1367.57500  | 483.80585  | Detected | Detected    | Detected    | Detected    |
| 3011 | A_32_P82189   | FAM161A      | Hs.440466 | family with sequence similarity 161, member A                                                     | Homo sapiens family with sequence similarity 161, member A (FAM161A), mRNA [NM_032180]                                                                           | 2.23124 | up | 1.63227 | up | 74.66921    | 34.65197   | 22.47290    | 12.14042   | Detected | Detected    | Detected    | Compromised |
| 3012 | A_24_P941051  | CSTF2T       | Hs.591358 | cleavage stimulation factor, 3' pre-RNA, subunit 2, 64kDa, tau variant                            | Homo sapiens cleavage stimulation factor, 3' pre-RNA, subunit 2, 64kDa, tau variant (CSTF2T), mRNA [NM_015235]                                                   | 2.23104 | up | 2.26311 | up | 2272.42300  | 1054.66500 | 1787.42980  | 696.44970  | Detected | Detected    | Detected    | Detected    |
| 3013 | A_32_P73452   | ANO8         | Hs.590990 | anoctamin 8                                                                                       | Homo sapiens anoctamin 8 (ANO8), mRNA [NM_020959]                                                                                                                | 2.23098 | up | 2.42479 | up | 595.59674   | 276.43344  | 133.82800   | 48.66736   | Detected | Detected    | Detected    | Detected    |
| 3014 | A_23_P333498  | EEP1         | Hs.487994 | endonuclease/exonuclease/phosphatase family domain containing 1                                   | Homo sapiens endonuclease/exonuclease/phosphatase family domain containing 1 (EEP1), mRNA [NM_030636]                                                            | 2.23058 | up | 2.18969 | up | 376.90717   | 174.96413  | 331.80774   | 133.61930  | Detected | Detected    | Detected    | Detected    |
| 3015 | A_33_P3279362 | NCRNA00110   |           | non-protein coding RNA 110                                                                        | Homo sapiens non-protein coding RNA 110 (NCRNA00110), non-coding RNA [NR_027021]                                                                                 | 2.23041 | up | 1.64426 | up | 23.91333    | 11.10170   | 24.60460    | 13.19507   | Detected | Compromised | Detected    | Detected    |
| 3016 | A_23_P88559   | LIPC         | Hs.654472 | lipase, hepatic                                                                                   | Homo sapiens lipase, hepatic (LIPC), mRNA [NM_000236]                                                                                                            | 2.22936 | up | 2.31325 | up | 101.33821   | 47.06812   | 63.28394    | 24.12325   | Detected | Detected    | Detected    | Detected    |
| 3017 | A_23_P122852  | SMARCD3      | Hs.647067 | SWI/SNF related, matrix associated, actin dependent regulator of chromatin, subfamily d, member 3 | Homo sapiens SWI/SNF related, matrix associated, actin dependent regulator of chromatin, subfamily d, member 3 (SMARCD3), transcript variant 2, mRNA [NM_003078] | 2.22915 | up | 2.33462 | up | 10948.12300 | 5085.48970 | 13912.39300 | 5254.73970 | Detected | Detected    | Detected    | Detected    |
| 3018 | A_33_P3416473 | LOC646999    | Hs.721168 | hypothetical LOC646999                                                                            | Homo sapiens hypothetical LOC646999 (LOC646999), non-coding RNA [NR_024390]                                                                                      | 2.22890 | up | 2.04877 | up | 342.35420   | 159.04466  | 257.79890   | 110.95687  | Detected | Detected    | Detected    | Detected    |
| 3019 | A_33_P3279526 |              |           |                                                                                                   |                                                                                                                                                                  | 2.22889 | up | 1.85715 | up | 587.14410   | 272.76532  | 294.43866   | 139.80171  | Detected | Detected    | Detected    | Detected    |
| 3020 | A_33_P3240647 | C21orf2      | Hs.517331 | chromosome 21 open reading frame 2                                                                | Homo sapiens chromosome 21 open reading frame 2 (C21orf2), mRNA [NM_004928]                                                                                      | 2.22854 | up | 2.30020 | up | 4746.81050  | 2205.54170 | 4340.98900  | 1664.13170 | Detected | Detected    | Detected    | Detected    |
| 3021 | A_23_P333138  | MON2         | Hs.389378 | MON2 homolog (S. cerevisiae)                                                                      | Homo sapiens MON2 homolog (S. cerevisiae) (MON2), mRNA [NM_015026]                                                                                               | 2.22789 | up | 3.27205 | up | 72.59484    | 33.74004   | 43.92775    | 11.83816   | Detected | Detected    | Detected    | Compromised |
| 3022 | A_33_P3393734 |              |           |                                                                                                   | 40S ribosomal protein S27 (Metallopan-stimulin 1)(MPS-1) [Source:UniProtKB/Swiss-Prot;Acc:P42877] [ENST00000392558]                                              | 2.22780 | up | 2.43839 | up | 166.93758   | 77.59078   | 143.55637   | 51.91401   | Detected | Detected    | Detected    | Detected    |
| 3023 | A_23_P386168  | PRR24        | Hs.128690 | proline rich 24                                                                                   | Homo sapiens proline rich 24 (PRR24), mRNA [NM_178511]                                                                                                           | 2.22616 | up | 2.05745 | up | 4174.54930  | 1941.72010 | 4976.74500  | 2132.95340 | Detected | Detected    | Detected    | Detected    |
| 3024 | A_33_P3212109 | DDDC2        | Hs.61345  | doublecortin domain containing 2                                                                  | Homo sapiens doublecortin domain containing 2 (DDDC2), mRNA [NM_016356]                                                                                          | 2.22589 | up | 4.10418 | up | 12.44481    | 5.78919    | 12.86791    | 2.76470    | Detected | Compromised | Compromised | Compromised |
| 3025 | A_23_P423695  | MXD4         | Hs.655020 | MAX dimerization protein 4                                                                        | Homo sapiens MAX dimerization protein 4 (MXD4), mRNA [NM_006454]                                                                                                 | 2.22512 | up | 2.21919 | up | 7824.97950  | 3641.35640 | 3037.94300  | 1207.12070 | Detected | Detected    | Detected    | Detected    |
| 3026 | A_24_P126741  |              |           |                                                                                                   |                                                                                                                                                                  | 2.22443 | up | 2.59242 | up | 2112.93750  | 983.55900  | 3379.77510  | 1149.60500 | Detected | Detected    | Detected    | Detected    |
| 3027 | A_33_P3222228 | FUT6         | Hs.631846 | fucosyltransferase 6 (alpha (1,3) fucosyltransferase)                                             | Homo sapiens fucosyltransferase 6 (alpha (1,3) fucosyltransferase) (FUT6), transcript variant 1, mRNA [NM_000150]                                                | 2.22424 | up | 2.16113 | up | 32.51440    | 15.13658   | 33.43899    | 13.64388   | Detected | Compromised | Detected    | Detected    |
| 3028 | A_23_P365086  | ANKRD5       | Hs.70903  | ankyrin repeat domain 5                                                                           | Homo sapiens ankyrin repeat domain 5 (ANKRD5), transcript variant 1, mRNA [NM_022996]                                                                            | 2.22409 | up | 4.34927 | up | 17.12206    | 7.97144    | 15.47770    | 3.13802    | Detected | Compromised | Detected    | Compromised |
| 3029 | A_24_P169896  | LOC100289922 |           | hypothetical protein LOC100289922                                                                 | cDNA FLJ32855 fis. clone TEST1000025, weakly similar to M.musculus testis-specific protein, DDC8 [Source:UniProtKB/TrEMBL;Acc:Q96M04] [ENST00000322630]          | 2.22403 | up | 1.61609 | up | 17.60120    | 8.19474    | 11.43444    | 6.23901    | Detected | Compromised | Compromised | Compromised |
| 3030 | A_23_P330537  | SPSB3        | Hs.592080 | splA/ryanodine receptor domain and SOCS box containing 3                                          | Homo sapiens splA/ryanodine receptor domain and SOCS box containing 3 (SPSB3), mRNA [NM_080861]                                                                  | 2.22402 | up | 1.97733 | up | 425.56067   | 198.13300  | 517.83984   | 230.93028  | Detected | Detected    | Detected    | Detected    |
| 3031 | A_33_P3324495 | ZFP41        | Hs.668016 | zinc finger protein 41 homolog (mouse)                                                            | Homo sapiens zinc finger protein 41 homolog (mouse) (ZFP41), mRNA [NM_173832]                                                                                    | 2.22309 | up | 2.33831 | up | 2808.01270  | 1307.90380 | 2471.86500  | 932.15410  | Detected | Detected    | Detected    | Detected    |

|      |               |           |           |                                                                                 |                                                                                                                                                                     |         |    |         |    |            |            |            |            |          |             |             |             |
|------|---------------|-----------|-----------|---------------------------------------------------------------------------------|---------------------------------------------------------------------------------------------------------------------------------------------------------------------|---------|----|---------|----|------------|------------|------------|------------|----------|-------------|-------------|-------------|
| 3032 | A_24_P329597  | UBQLN1    | Hs.9589   | ubiquitin 1                                                                     | Homo sapiens ubiquitin 1 (UBQLN1), transcript variant 1, mRNA [NM_013438]                                                                                           | 2.22286 | up | 2.47773 | up | 590.53440  | 275.08505  | 188.27023  | 67.00285   | Detected | Detected    | Detected    | Detected    |
| 3033 | A_33_P3250887 | C22orf41  | Hs.535660 | chromosome 22 open reading frame 41                                             | Homo sapiens chromosome 22 open reading frame 41 (C22orf41), mRNA [NM_001123225]                                                                                    | 2.22263 | up | 2.42790 | up | 34.68342   | 16.15800   | 32.61946   | 11.84706   | Detected | Compromised | Detected    | Compromised |
| 3034 | A_23_P381577  | ZNF25     | Hs.499429 | zinc finger protein 25                                                          | Homo sapiens zinc finger protein 25 (ZNF25), mRNA [NM_145011]                                                                                                       | 2.22231 | up | 2.56651 | up | 1171.19900 | 545.70557  | 702.07556  | 241.21614  | Detected | Detected    | Detected    | Detected    |
| 3035 | A_33_P3245006 | DAK       | Hs.6278   | dihydroxyacetone kinase 2 homolog (S. cerevisiae)                               | Homo sapiens dihydroxyacetone kinase 2 homolog (S. cerevisiae) (DAK), mRNA [NM_015533]                                                                              | 2.22148 | up | 3.27183 | up | 1026.40990 | 478.42350  | 742.99786  | 200.24557  | Detected | Detected    | Detected    | Detected    |
| 3036 | A_33_P3522511 | KIAA0485  | Hs.604754 | hypothetical LOC57235                                                           | Homo sapiens mRNA, chromosome 1 specific transcript KIAA0485 [AB007954]                                                                                             | 2.22129 | up | 2.63565 | up | 143.48929  | 66.88791   | 100.67370  | 33.68170   | Detected | Detected    | Detected    | Detected    |
| 3037 | A_33_P3221303 | CCR10     | Hs.278446 | chemokine (C-C motif) receptor 10                                               | Homo sapiens chemokine (C-C motif) receptor 10 (CCR10), mRNA [NM_016602]                                                                                            | 2.22109 | up | 2.14478 | up | 2277.01100 | 1061.52800 | 1819.60740 | 748.10315  | Detected | Detected    | Detected    | Detected    |
| 3038 | A_32_P36046   | C2orf68   | Hs.516159 | chromosome 2 open reading frame 68                                              | Homo sapiens chromosome 2 open reading frame 68 (C2orf68), mRNA [NM_001013649]                                                                                      | 2.22026 | up | 2.00594 | up | 921.02435  | 429.53690  | 761.71660  | 334.84244  | Detected | Detected    | Detected    | Detected    |
| 3039 | A_23_P171095  | USP27X    | Hs.143587 | ubiquitin specific peptidase 27, X-linked                                       | Homo sapiens ubiquitin specific peptidase 27, X-linked (USP27X), mRNA [NM_001145073]                                                                                | 2.21927 | up | 2.32938 | up | 39.39882   | 18.38253   | 13.24209   | 5.01283    | Detected | Compromised | Compromised | Compromised |
| 3040 | A_32_P515088  | KDSR      | Hs.74050  | 3-ketodihydroshingosine reductase                                               | Homo sapiens 3-ketodihydroshingosine reductase (KDSR), mRNA [NM_002035]                                                                                             | 2.21901 | up | 2.24973 | up | 3151.88400 | 1470.76720 | 2044.82370 | 801.47565  | Detected | Detected    | Detected    | Detected    |
| 3041 | A_23_P93704   | C7orf61   | Hs.632306 | chromosome 7 open reading frame 61                                              | Homo sapiens chromosome 7 open reading frame 61 (C7orf61), mRNA [NM_001004323]                                                                                      | 2.21797 | up | 2.31599 | up | 121.51906  | 56.73119   | 95.19649   | 36.24519   | Detected | Detected    | Detected    | Detected    |
| 3042 | A_33_P3265376 | HOMER3    | Hs.720208 | homer homolog 3 (Drosophila)                                                    | Homo sapiens homer homolog 3 (Drosophila) (HOMER3), transcript variant 4, mRNA [NM_001145724]                                                                       | 2.21745 | up | 1.38018 | up | 3487.56270 | 1628.55350 | 5318.75200 | 3398.12040 | Detected | Detected    | Detected    | Detected    |
| 3043 | A_23_P116037  | TM7SF2    | Hs.31130  | transmembrane 7 superfamily member 2                                            | Homo sapiens transmembrane 7 superfamily member 2 (TM7SF2), mRNA [NM_003273]                                                                                        | 2.21675 | up | 1.95058 | up | 56.69408   | 26.48223   | 41.57246   | 18.79347   | Detected | Detected    | Detected    | Detected    |
| 3044 | A_24_P201404  | C11orf54  | Hs.8360   | chromosome 11 open reading frame 54                                             | Homo sapiens chromosome 11 open reading frame 54 (C11orf54), mRNA [NM_014039]                                                                                       | 2.21661 | up | 2.39950 | up | 869.39404  | 406.12610  | 753.98724  | 277.08200  | Detected | Detected    | Detected    | Detected    |
| 3045 | A_24_P7629    | RPL32P3   |           | ribosomal protein L32 pseudogene 3                                              | Homo sapiens ribosomal protein L32 pseudogene 3 (RPL32P3), non-coding RNA [NR_003111]                                                                               | 2.21526 | up | 2.08038 | up | 24.22241   | 11.32208   | 16.68334   | 7.07140    | Detected | Compromised | Detected    | Compromised |
| 3046 | A_33_P3296240 | CNTLN     | Hs.435381 | centlein, centrosomal protein                                                   | Homo sapiens centlein, centrosomal protein (CNTLN), transcript variant 1, mRNA [NM_017738]                                                                          | 2.21470 | up | 2.31434 | up | 96.60606   | 45.16704   | 53.23661   | 20.28381   | Detected | Detected    | Detected    | Detected    |
| 3047 | A_23_P145895  | TP53TG1   |           | TP53 target 1 (non-protein coding)                                              | Homo sapiens TP53 target 1 (non-protein coding) (TP53TG1), non-coding RNA [NR_015381]                                                                               | 2.21297 | up | 2.24636 | up | 3586.01900 | 1677.91490 | 3139.65480 | 1232.44560 | Detected | Detected    | Detected    | Detected    |
| 3048 | A_33_P3242109 |           |           |                                                                                 |                                                                                                                                                                     | 2.21287 | up | 2.78007 | up | 206.67018  | 96.70651   | 150.98778  | 47.89073   | Detected | Detected    | Detected    | Detected    |
| 3049 | A_33_P3753757 | LOC158402 | Hs.494822 | hypothetical protein LOC158402                                                  | Homo sapiens cDNA FLJ38333 fis. clone FCBBF3025674 [AK095652]                                                                                                       | 2.21198 | up | 1.63739 | up | 19.12863   | 8.95440    | 16.96800   | 9.13783    | Detected | Compromised | Detected    | Compromised |
| 3050 | A_33_P3318534 | ACPL2     | Hs.657887 | acid phosphatase-like 2                                                         | Homo sapiens acid phosphatase-like 2 (ACPL2), transcript variant 1, mRNA [NM_152282]                                                                                | 2.21122 | up | 1.43507 | up | 369.05618  | 172.81972  | 212.95341  | 130.85135  | Detected | Detected    | Detected    | Detected    |
| 3051 | A_23_P14892   | IGFALS    | Hs.839    | insulin-like growth factor binding protein, acid labile subunit                 | Homo sapiens insulin-like growth factor binding protein, acid labile subunit (IGFALS), transcript variant 2, mRNA [NM_004970]                                       | 2.21112 | up | 1.72548 | up | 47.51930   | 22.25312   | 51.22060   | 26.17587   | Detected | Detected    | Detected    | Detected    |
| 3052 | A_24_P236091  | ENO2      | Hs.511915 | enolase 2 (gamma, neuronal)                                                     | Homo sapiens enolase 2 (gamma, neuronal) (ENO2), mRNA [NM_001975]                                                                                                   | 2.21104 | up | 2.08510 | up | 823.66675  | 385.73364  | 662.95996  | 280.36688  | Detected | Detected    | Detected    | Detected    |
| 3053 | A_24_P200848  | SNX13     | Hs.487648 | sorting nexin 13                                                                | Homo sapiens sorting nexin 13 (SNX13), mRNA [NM_015132]                                                                                                             | 2.21059 | up | 2.21868 | up | 1177.93840 | 551.75696  | 644.47034  | 256.13830  | Detected | Detected    | Detected    | Detected    |
| 3054 | A_23_P125643  | ASB9      | Hs.19404  | ankyrin repeat and SOCS box-containing 9                                        | Homo sapiens ankyrin repeat and SOCS box-containing 9 (ASB9), transcript variant 1, mRNA [NM_001031738]                                                             | 2.21014 | up | 2.23901 | up | 135.25587  | 63.36802   | 88.68623   | 34.92737   | Detected | Detected    | Detected    | Detected    |
| 3055 | A_33_P3213962 | OR13A1    | Hs.532435 | olfactory receptor, family 13, subfamily A, member 1                            | Homo sapiens olfactory receptor, family 13, subfamily A, member 1 (OR13A1), mRNA [NM_001004297]                                                                     | 2.21012 | up | 2.26897 | up | 69.06363   | 32.35684   | 64.60424   | 25.10714   | Detected | Detected    | Detected    | Detected    |
| 3056 | A_23_P152583  | ENGASE    | Hs.29288  | endo-beta-N-acetylglucosaminidase                                               | Homo sapiens endo-beta-N-acetylglucosaminidase (ENGASE), mRNA [NM_001042573]                                                                                        | 2.20971 | up | 2.13178 | up | 1478.49040 | 692.81390  | 1176.57020 | 486.67828  | Detected | Detected    | Detected    | Detected    |
| 3057 | A_23_P377339  | C4orf36   | Hs.339646 | chromosome 4 open reading frame 36                                              | Homo sapiens chromosome 4 open reading frame 36 (C4orf36), mRNA [NM_144645]                                                                                         | 2.20949 | up | 1.18439 | up | 19.89038   | 9.32149    | 23.73599   | 17.67168   | Detected | Compromised | Detected    | Detected    |
| 3058 | A_23_P502047  | CHRD      | Hs.166186 | chordin                                                                         | Homo sapiens chordin (CHRD), mRNA [NM_003741]                                                                                                                       | 2.20889 | up | 1.37595 | up | 525.83710  | 246.49597  | 627.15780  | 401.91970  | Detected | Detected    | Detected    | Detected    |
| 3059 | A_33_P3318668 | C9orf169  | Hs.512469 | chromosome 9 open reading frame 169                                             | Homo sapiens chromosome 9 open reading frame 169 (C9orf169), mRNA [NM_199001]                                                                                       | 2.20797 | up | 2.14390 | up | 584.18823  | 273.96378  | 622.15770  | 255.89459  | Detected | Detected    | Detected    | Detected    |
| 3060 | A_23_P96761   | ACADM     | Hs.445040 | acyl-Coenzyme A dehydrogenase, C-4 to C-12 straight chain                       | Homo sapiens acyl-Coenzyme A dehydrogenase, C-4 to C-12 straight chain (ACADM), nuclear gene encoding mitochondrial protein, transcript variant 1, mRNA [NM_000016] | 2.20797 | up | 2.19304 | up | 1070.82100 | 502.17783  | 627.54720  | 252.32834  | Detected | Detected    | Detected    | Detected    |
| 3061 | A_24_P250650  | RABL2A    | Hs.446425 | RAB, member of RAS oncogene family-like 2A                                      | Homo sapiens RAB, member of RAS oncogene family-like 2A (RABL2A), transcript variant 1, mRNA [NM_013412]                                                            | 2.20541 | up | 2.14050 | up | 8050.58200 | 3779.81270 | 6484.52640 | 2671.33060 | Detected | Detected    | Detected    | Detected    |
| 3062 | A_32_P151366  | SIRT5     | Hs.567431 | sirtuin (silent mating type information regulation 2 homolog) 5 (S. cerevisiae) | Homo sapiens sirtuin (silent mating type information regulation 2 homolog) 5 (S. cerevisiae) (SIRT5), transcript variant 1, mRNA [NM_012241]                        | 2.20537 | up | 2.13699 | up | 657.76360  | 308.83182  | 604.41516  | 249.40137  | Detected | Detected    | Detected    | Detected    |

|      |               |               |           |                                                                    |                                                                                                                                   |         |    |         |    |             |             |             |             |          |             |             |             |
|------|---------------|---------------|-----------|--------------------------------------------------------------------|-----------------------------------------------------------------------------------------------------------------------------------|---------|----|---------|----|-------------|-------------|-------------|-------------|----------|-------------|-------------|-------------|
| 3063 | A_33_P3243168 | MZF1          | Hs.399810 | myeloid zinc finger 1                                              | Homo sapiens myeloid zinc finger 1 (MZF1), transcript variant 2, mRNA [NM_198055]                                                 | 2.20495 | up | 2.05579 | up | 3705.25020  | 1740.01380  | 3333.14450  | 1429.68490  | Detected | Detected    | Detected    | Detected    |
| 3064 | A_23_P259344  | CECR6         | Hs.209577 | cat eye syndrome chromosome region, candidate 6                    | Homo sapiens cat eye syndrome chromosome region, candidate 6 (CECR6), transcript variant 1, mRNA [NM_031890]                      | 2.20457 | up | 2.02739 | up | 103.64081   | 48.67877    | 84.73400    | 36.85411    | Detected | Detected    | Detected    | Detected    |
| 3065 | A_23_P60339   | C9orf64       | Hs.208914 | chromosome 9 open reading frame 64                                 | Homo sapiens chromosome 9 open reading frame 64 (C9orf64), mRNA [NM_032307]                                                       | 2.20451 | up | 2.27825 | up | 262.53265   | 123.31159   | 244.53426   | 94.64636    | Detected | Detected    | Detected    | Detected    |
| 3066 | A_33_P3372297 | ABR           | Hs.159306 | active BCR-related gene                                            | Homo sapiens active BCR-related gene (ABR), transcript variant 3, mRNA [NM_001159746]                                             | 2.20332 | up | 2.03817 | up | 101.10068   | 47.51266    | 92.58960    | 40.05791    | Detected | Detected    | Detected    | Detected    |
| 3067 | A_32_P113584  | ZNF292        | Hs.485892 | zinc finger protein 292                                            | Homo sapiens zinc finger protein 292 (ZNF292), mRNA [NM_015021]                                                                   | 2.20331 | up | 1.98732 | up | 455.88202   | 214.24437   | 276.92285   | 122.87330   | Detected | Detected    | Detected    | Detected    |
| 3068 | A_32_P177539  | IRX6          | Hs.368907 | iroquois homeobox 6                                                | Homo sapiens iroquois homeobox 6 (IRX6), mRNA [NM_024335]                                                                         | 2.20309 | up | 2.14108 | up | 16.56641    | 7.78626     | 13.75806    | 5.66619     | Detected | Compromised | Compromised | Compromised |
| 3069 | A_33_P3323822 | GATAD2B       | Hs.4779   | GATA zinc finger domain containing 2B                              | Homo sapiens GATA zinc finger domain containing 2B (GATAD2B), mRNA [NM_020699]                                                    | 2.20276 | up | 2.52925 | up | 447.56784   | 210.39014   | 326.16770   | 113.71430   | Detected | Detected    | Detected    | Detected    |
| 3070 | A_33_P3379456 | SH3YL1        | Hs.515951 | SH3 domain containing, Ysc84-like 1 (S. cerevisiae)                | Homo sapiens SH3 domain containing, Ysc84-like 1 (S. cerevisiae) (SH3YL1), transcript variant 1, mRNA [NM_015677]                 | 2.20252 | up | 2.22439 | up | 3618.67100  | 1701.22800  | 3006.76250  | 1191.93950  | Detected | Detected    | Detected    | Detected    |
| 3071 | A_24_P89843   | CYHR1         | Hs.459379 | cysteine/histidine-rich 1                                          | Homo sapiens cysteine/histidine-rich 1 (CYHR1), transcript variant 2, mRNA [NM_032687]                                            | 2.20165 | up | 1.96526 | up | 1304.02930  | 613.29930   | 1424.48610  | 639.15270   | Detected | Detected    | Detected    | Detected    |
| 3072 | A_33_P3224362 | PCBP3         | Hs.474049 | poly(rC) binding protein 3                                         | Homo sapiens poly(rC) binding protein 3 (PCBP3), transcript variant 1, mRNA [NM_020528]                                           | 2.20141 | up | 2.83399 | up | 241.61534   | 113.64641   | 182.69499   | 56.84526    | Detected | Detected    | Detected    | Detected    |
| 3073 | A_23_P101297  | EML2          | Hs.24178  | echinoderm microtubule associated protein like 2                   | Homo sapiens echinoderm microtubule associated protein like 2 (EML2), mRNA [NM_012155]                                            | 2.20052 | up | 1.83147 | up | 905.73285   | 426.19382   | 995.59980   | 479.34723   | Detected | Detected    | Detected    | Detected    |
| 3074 | A_32_P16315   | RP11-631M21.2 | Hs.532659 | tubulin, beta 8                                                    | Homo sapiens tubulin, beta 8 (TUBB8), transcript variant 2, mRNA [NM_001164154]                                                   | 2.20025 | up | 2.30732 | up | 74.24895    | 34.94233    | 29.85961    | 11.41146    | Detected | Detected    | Detected    | Compromised |
| 3075 | A_33_P3333507 | SEN7          | Hs.529551 | SUMO1/sentrin specific peptidase 7                                 | Homo sapiens SUMO1/sentrin specific peptidase 7 (SEN7), transcript variant 1, mRNA [NM_020654]                                    | 2.20002 | up | 2.63484 | up | 51.49221    | 24.23524    | 55.42193    | 18.54781    | Detected | Detected    | Detected    | Detected    |
| 3076 | A_23_P114061  | TRPM3         | Hs.47288  | transient receptor potential cation channel, subfamily M, member 3 | Homo sapiens transient receptor potential cation channel, subfamily M, member 3 (TRPM3), transcript variant 8, mRNA [NM_00107471] | 2.19998 | up | 2.01049 | up | 49.71554    | 23.39952    | 35.30045    | 15.48263    | Detected | Detected    | Detected    | Detected    |
| 3077 | A_24_P157087  | CASP8         | Hs.599762 | caspase 8, apoptosis-related cysteine peptidase                    | Homo sapiens caspase 8, apoptosis-related cysteine peptidase (CASP8), transcript variant B, mRNA [NM_033355]                      | 2.19997 | up | 2.75169 | up | 53.43244    | 25.14905    | 66.49148    | 21.30745    | Detected | Detected    | Detected    | Detected    |
| 3078 | A_33_P3248231 | LOC283028     | Hs.646699 | hypothetical protein LOC283028                                     | PREDICTED: Homo sapiens hypothetical protein LOC283028 (LOC283028), miscRNA [XR_017707]                                           | 2.19970 | up | 3.20002 | up | 43.56344    | 20.50653    | 22.81017    | 6.28551     | Detected | Detected    | Detected    | Compromised |
| 3079 | A_23_P311010  | SPRY3         | Hs.381912 | sprouty homolog 3 (Drosophila)                                     | Homo sapiens sprouty homolog 3 (Drosophila) (SPRY3), mRNA [NM_005840]                                                             | 2.19968 | up | 2.13678 | up | 268.54788   | 126.41378   | 197.07384   | 81.32700    | Detected | Detected    | Detected    | Detected    |
| 3080 | A_33_P3257367 | TRIM33        | Hs.26837  | tripartite motif-containing 33                                     | Homo sapiens tripartite motif-containing 33 (TRIM33), transcript variant a, mRNA [NM_015906]                                      | 2.19935 | up | 2.38970 | up | 2396.15620  | 1128.11770  | 1001.41016  | 369.51633   | Detected | Detected    | Detected    | Detected    |
| 3081 | A_23_P406385  | FBXL16        | Hs.513244 | F-box and leucine-rich repeat protein 16                           | Homo sapiens F-box and leucine-rich repeat protein 16 (FBXL16), mRNA [NM_153350]                                                  | 2.19849 | up | 2.22141 | up | 1099.33190  | 517.77140   | 675.88135   | 268.29184   | Detected | Detected    | Detected    | Detected    |
| 3082 | A_23_P23575   | SLC39A1       | Hs.7854   | solute carrier family 39 (zinc transporter), member 1              | Homo sapiens solute carrier family 39 (zinc transporter), member 1 (SLC39A1), mRNA [NM_014437]                                    | 2.19840 | up | 2.04758 | up | 4865.43460  | 2291.64920  | 5801.53600  | 2498.43000  | Detected | Detected    | Detected    | Detected    |
| 3083 | A_23_P137157  | RENBP         | Hs.158331 | renin binding protein                                              | Homo sapiens renin binding protein (RENBP), mRNA [NM_002910]                                                                      | 2.19734 | up | 2.13547 | up | 134.68500   | 63.46808    | 165.39267   | 68.29488    | Detected | Detected    | Detected    | Detected    |
| 3084 | A_23_P14493   | C14orf104     | Hs.231761 | chromosome 14 open reading frame 104                               | Homo sapiens chromosome 14 open reading frame 104 (C14orf104), transcript variant 1, mRNA [NM_018139]                             | 2.19707 | up | 2.21917 | up | 2810.37480  | 1324.50600  | 2195.48900  | 872.38245   | Detected | Detected    | Detected    | Detected    |
| 3085 | A_33_P3270084 |               |           |                                                                    |                                                                                                                                   | 2.19675 | up | 3.01066 | up | 228.33914   | 107.82980   | 101.22479   | 29.64773    | Detected | Detected    | Detected    | Detected    |
| 3086 | A_33_P3345354 | C1orf66       | Hs.512597 | chromosome 1 open reading frame 66                                 | Homo sapiens chromosome 1 open reading frame 66 (C1orf66), transcript variant 1, mRNA [NM_015997]                                 | 2.19584 | up | 2.85792 | up | 2562.64970  | 1208.43000  | 2757.65800  | 850.85583   | Detected | Detected    | Detected    | Detected    |
| 3087 | A_23_P251647  | RFESD         | Hs.399758 | Rieske (Fe-S) domain containing                                    | Homo sapiens Rieske (Fe-S) domain containing (RFESD), transcript variant 2, mRNA [NM_173362]                                      | 2.19465 | up | 2.43780 | up | 282.44810   | 133.26201   | 261.74698   | 94.67802    | Detected | Detected    | Detected    | Detected    |
| 3088 | A_23_P327361  | DMXL2         | Hs.511386 | Dmx-like 2                                                         | Homo sapiens Dmx-like 2 (DMXL2), mRNA [NM_015263]                                                                                 | 2.19463 | up | 2.63372 | up | 30.72939    | 14.49861    | 22.66277    | 7.58769     | Detected | Compromised | Detected    | Compromised |
| 3089 | A_23_P212511  | TTC14         | Hs.43213  | tetratricopeptide repeat domain 14                                 | Homo sapiens tetratricopeptide repeat domain 14 (TTC14), transcript variant 2, mRNA [NM_001042601]                                | 2.19453 | up | 2.34123 | up | 574.75580   | 271.19040   | 509.56726   | 191.92099   | Detected | Detected    | Detected    | Detected    |
| 3090 | A_33_P3380693 | ADAM15        | Hs.312098 | ADAM metalloproteinase domain 15                                   | Homo sapiens ADAM metalloproteinase domain 15 (ADAM15), transcript variant 6, mRNA [NM_207197]                                    | 2.19399 | up | 1.66134 | up | 42563.49200 | 20087.97500 | 48000.73400 | 25477.31600 | Detected | Detected    | Detected    | Detected    |
| 3091 | A_33_P3396891 | AVP1          | Hs.23918  | arginine vasopressin-induced 1                                     | Homo sapiens arginine vasopressin-induced 1 (AVP1), mRNA [NM_021732]                                                              | 2.19376 | up | 2.11827 | up | 5384.04600  | 2541.28300  | 3957.60200  | 1647.46300  | Detected | Detected    | Detected    | Detected    |
| 3092 | A_33_P3386117 | RER1          | Hs.525527 | RER1 retention in endoplasmic reticulum 1 homolog (S. cerevisiae)  | Homo sapiens RER1 retention in endoplasmic reticulum 1 homolog (S. cerevisiae) (RER1), mRNA [NM_007033]                           | 2.19241 | up | 1.95115 | up | 3210.81450  | 1516.44340  | 3588.55880  | 1621.79520  | Detected | Detected    | Detected    | Detected    |
| 3093 | A_33_P3228023 | SCOPE1        | Hs.514950 | serine carboxypeptidase 1                                          | Homo sapiens serine carboxypeptidase 1 (SCOPE1), mRNA [NM_021626]                                                                 | 2.19231 | up | 1.67869 | up | 180.83676   | 85.41187    | 231.55954   | 121.63503   | Detected | Detected    | Detected    | Detected    |



|      |               |              |           |                                                                                                |                                                                                                                                                                |         |    |          |    |            |            |            |            |          |             |             |             |
|------|---------------|--------------|-----------|------------------------------------------------------------------------------------------------|----------------------------------------------------------------------------------------------------------------------------------------------------------------|---------|----|----------|----|------------|------------|------------|------------|----------|-------------|-------------|-------------|
| 3094 | A_33_P3248203 | FUT5         | Hs.631843 | fucosyltransferase 5 (alpha (1,3) fucosyltransferase)                                          | Homo sapiens fucosyltransferase 5 (alpha (1,3) fucosyltransferase) (FUT5), mRNA [NM_002034]                                                                    | 2.19215 | up | 1.55136  | up | 24.21105   | 11.43604   | 28.10486   | 15.97471   | Detected | Compromised | Detected    | Detected    |
| 3095 | A_23_P14157   | DZIP1        | Hs.656580 | DAZ interacting protein 1                                                                      | Homo sapiens DAZ interacting protein 1 (DZIP1), transcript variant 2, mRNA [NM_198968]                                                                         | 2.19210 | up | 2.14183  | up | 2718.34550 | 1284.03550 | 2402.41630 | 989.07355  | Detected | Detected    | Detected    | Detected    |
| 3096 | A_24_P114249  | GALNT3       | Hs.170986 | UDP-N-acetyl-alpha-D-galactosamine:polypeptide N-acetylgalactosaminyltransferase 3 (GalNAc-T3) | Homo sapiens UDP-N-acetyl-alpha-D-galactosamine:polypeptide N-acetylgalactosaminyltransferase 3 (GalNAc-T3) (GALNT3), mRNA [NM_004482]                         | 2.19115 | up | 1.48657  | up | 45.18549   | 21.35303   | 20.21438   | 11.99059   | Detected | Detected    | Detected    | Compromised |
| 3097 | A_33_P3380652 | ADAM28       | Hs.174030 | ADAM metallopeptidase domain 28                                                                | Homo sapiens ADAM metallopeptidase domain 28 (ADAM28), transcript variant 3, mRNA [NM_021777]                                                                  | 2.19050 | up | 2.82807  | up | 46.64184   | 22.04786   | 28.90214   | 9.01167    | Detected | Detected    | Detected    | Compromised |
| 3098 | A_23_P215037  | WTAP         | Hs.446091 | Wilms tumor 1 associated protein                                                               | Homo sapiens Wilms tumor 1 associated protein (WTAP), transcript variant 3, mRNA [NM_152658]                                                                   | 2.19028 | up | 2.22113  | up | 9760.67800 | 4614.37900 | 6969.41940 | 2766.86290 | Detected | Detected    | Detected    | Detected    |
| 3099 | A_23_P17880   | DNAL4        | Hs.632766 | dynein, axonemal, light chain 4                                                                | Homo sapiens dynein, axonemal, light chain 4 (DNAL4), mRNA [NM_005740]                                                                                         | 2.19006 | up | 2.12454  | up | 424.15475  | 200.54045  | 446.51758  | 185.32689  | Detected | Detected    | Detected    | Detected    |
| 3100 | A_33_P3268129 |              | Hs.575858 |                                                                                                | Putative uncharacterized protein C1orf98 [Source:UniProtKB/Swiss-Prot;Acc:A6NCI6] [ENST00000367356]                                                            | 2.18997 | up | 2.99446  | up | 82.94727   | 39.21912   | 63.63493   | 18.73886   | Detected | Detected    | Detected    | Detected    |
| 3101 | A_23_P207058  | SOCS3        | Hs.527973 | suppressor of cytokine signaling 3                                                             | Homo sapiens suppressor of cytokine signaling 3 (SOCS3), mRNA [NM_003955]                                                                                      | 2.18981 | up | 1.97398  | up | 5844.79830 | 2763.73320 | 5653.16400 | 2525.30400 | Detected | Detected    | Detected    | Detected    |
| 3102 | A_24_P181149  | BBS10        | Hs.96322  | Bardet-Biedl syndrome 10                                                                       | Homo sapiens Bardet-Biedl syndrome 10 (BBS10), mRNA [NM_024685]                                                                                                | 2.18946 | up | 2.31231  | up | 1288.75930 | 609.49176  | 770.27234  | 293.74094  | Detected | Detected    | Detected    | Detected    |
| 3103 | A_24_P135427  | LOC100128398 | Hs.721608 | hypothetical protein LOC100128398                                                              | cDNA FLJ37429 fis. clone BRAWH12001666 [Source:UniProtKB/TrEMBL;Acc:Q8N9G5] [ENST00000313957]                                                                  | 2.18871 | up | 1.85334  | up | 91.35387   | 43.21880   | 53.48223   | 25.44599   | Detected | Detected    | Detected    | Detected    |
| 3104 | A_33_P3281258 |              |           |                                                                                                |                                                                                                                                                                | 2.18854 | up | 1.49128  | up | 20.75557   | 9.82003    | 4.94577    | 2.92442    | Detected | Compromised | Compromised | Compromised |
| 3105 | A_24_P269814  | PLEKHA1      | Hs.643512 | pleckstrin homology domain containing, family A (phosphoinositide binding specific) member 1   | Homo sapiens pleckstrin homology domain containing, family A (phosphoinositide binding specific) member 1 (PLEKHA1), transcript variant 2, mRNA [NM_001001974] | 2.18854 | up | 2.39877  | up | 5676.40670 | 2685.66670 | 3387.13570 | 1245.11350 | Detected | Detected    | Detected    | Detected    |
| 3106 | A_33_P3254946 | PLEKHH3      | Hs.632251 | pleckstrin homology domain containing, family H (with MYTH4 domain) member 3                   | Homo sapiens pleckstrin homology domain containing, family H (with MYTH4 domain) member 3 (PLEKHH3), mRNA [NM_024927]                                          | 2.18816 | up | 1.93474  | up | 9381.95600 | 4439.64060 | 5067.00400 | 2309.37300 | Detected | Detected    | Detected    | Detected    |
| 3107 | A_33_P3292387 | LRRIG3       | Hs.644625 | leucine-rich repeats and IQ motif containing 3                                                 | Homo sapiens leucine-rich repeats and IQ motif containing 3 (LRRIG3), mRNA [NM_001105659]                                                                      | 2.18787 | up | 2.34671  | up | 198.47008  | 93.93043   | 155.73573  | 58.51874   | Detected | Detected    | Detected    | Detected    |
| 3108 | A_33_P3638471 | TRGV7        | Hs.534032 | T cell receptor gamma variable 7 pseudogene                                                    | Homo sapiens T cell receptor gamma variable 7 pseudogene, mRNA (cDNA clone IMAGE:5210958), [BC027954]                                                          | 2.18724 | up | 2.28209  | up | 212.10983  | 100.41452  | 131.41263  | 50.77732   | Detected | Detected    | Detected    | Detected    |
| 3109 | A_24_P41371   | CC2D1A       | Hs.269592 | coiled-coil and C2 domain containing 1A                                                        | Homo sapiens coiled-coil and C2 domain containing 1A (CC2D1A), mRNA [NM_017721]                                                                                | 2.18685 | up | 1.43238  | up | 44.81672   | 21.22040   | 42.12353   | 25.93178   | Detected | Detected    | Detected    | Detected    |
| 3110 | A_23_P31116   | ACOT13       | Hs.9676   | acyl-CoA thioesterase 13                                                                       | Homo sapiens acyl-CoA thioesterase 13 (ACOT13), transcript variant 1, mRNA [NM_018473]                                                                         | 2.18646 | up | 2.00605  | up | 8893.26200 | 4211.64400 | 8939.50000 | 3929.49020 | Detected | Detected    | Detected    | Detected    |
| 3111 | A_23_P214897  | AKAP12       | Hs.371240 | A kinase (PRKA) anchor protein 12                                                              | Homo sapiens A kinase (PRKA) anchor protein 12 (AKAP12), transcript variant 2, mRNA [NM_144497]                                                                | 2.18644 | up | 2.05608  | up | 7299.80860 | 3457.06270 | 3370.20650 | 1445.38320 | Detected | Detected    | Detected    | Detected    |
| 3112 | A_32_P42964   | LOC389493    | Hs.177948 | hypothetical protein LOC389493                                                                 | Homo sapiens hypothetical protein LOC389493 (LOC389493), mRNA [NM_001145712]                                                                                   | 2.18513 | up | 2.21311  | up | 452.71768  | 214.52795  | 306.65088  | 122.18169  | Detected | Detected    | Detected    | Detected    |
| 3113 | A_23_P91640   | ASPHD2       | Hs.567547 | aspartate beta-hydroxylase domain containing 2                                                 | Homo sapiens aspartate beta-hydroxylase domain containing 2 (ASPHD2), mRNA [NM_020437]                                                                         | 2.18502 | up | 4.00963  | up | 315.80950  | 149.65936  | 423.05765  | 93.03819   | Detected | Detected    | Detected    | Detected    |
| 3114 | A_23_P52531   | FAM24B       | Hs.114648 | family with sequence similarity 24, member B                                                   | Homo sapiens family with sequence similarity 24, member B (FAM24B), mRNA [NM_152644]                                                                           | 2.18434 | up | 2.21001  | up | 1736.34280 | 823.09310  | 1515.78900 | 604.79690  | Detected | Detected    | Detected    | Detected    |
| 3115 | A_24_P248863  | ZCHC4        | Hs.278945 | zinc finger, CCHC domain containing 4                                                          | Homo sapiens zinc finger, CCHC domain containing 4 (ZCHC4), mRNA [NM_024936]                                                                                   | 2.18425 | up | 2.32952  | up | 1285.49890 | 609.39910  | 614.19390  | 232.48978  | Detected | Detected    | Detected    | Detected    |
| 3116 | A_32_P89827   | LOC374491    | Hs.406779 | TPTE and PTEN homologous inositol lipid phosphatase pseudogene                                 | Homo sapiens TPTE and PTEN homologous inositol lipid phosphatase pseudogene (LOC374491), non-coding RNA [NR_002815]                                            | 2.18372 | up | 2.65094  | up | 235.21585  | 111.53307  | 218.58627  | 72.70898   | Detected | Detected    | Detected    | Detected    |
| 3117 | A_33_P3285987 | METT5D1      | Hs.243326 | methyltransferase 5 domain containing 1                                                        | Homo sapiens methyltransferase 5 domain containing 1 (METT5D1), transcript variant 2, mRNA [NM_152636]                                                         | 2.18362 | up | 2.03536  | up | 1253.68470 | 594.49030  | 933.17880  | 404.28564  | Detected | Detected    | Detected    | Detected    |
| 3118 | A_33_P3338693 | SNAP25       | Hs.167317 | synaptosomal-associated protein, 25kDa                                                         | Homo sapiens synaptosomal-associated protein, 25kDa (SNAP25), transcript variant 1, mRNA [NM_003001]                                                           | 2.18273 | up | 10.33788 | up | 3170.61820 | 1504.09790 | 1991.59180 | 169.87694  | Detected | Detected    | Detected    | Detected    |
| 3119 | A_33_P3347457 |              |           |                                                                                                |                                                                                                                                                                | 2.18262 | up | 1.28927  | up | 12.42766   | 5.89582    | 5.20820    | 3.56212    | Detected | Compromised | Compromised | Compromised |
| 3120 | A_23_P48747   | DHRS1        | Hs.348350 | dehydrogenase/reductase (SDR family) member 1                                                  | Homo sapiens dehydrogenase/reductase (SDR family) member 1 (DHRS1), transcript variant 2, mRNA [NM_138452]                                                     | 2.18256 | up | 2.17055  | up | 2077.05370 | 985.40594  | 2295.56230 | 932.57880  | Detected | Detected    | Detected    | Detected    |
| 3121 | A_33_P3361422 | CYP27A1      | Hs.516700 | cytochrome P450, family 27, subfamily A, polypeptide 1                                         | Homo sapiens cytochrome P450, family 27, subfamily A, polypeptide 1 (CYP27A1), nuclear gene encoding mitochondrial protein, mRNA [NM_000784]                   | 2.18179 | up | 2.06936  | up | 4265.50050 | 2024.37540 | 4144.21140 | 1765.92360 | Detected | Detected    | Detected    | Detected    |
| 3122 | A_23_P255663  | MANEA        | Hs.533323 | mannosidase, endo-alpha                                                                        | Homo sapiens mannosidase, endo-alpha (MANEA), mRNA [NM_024641]                                                                                                 | 2.18177 | up | 2.16071  | up | 1389.76870 | 659.57930  | 1090.14800 | 444.89127  | Detected | Detected    | Detected    | Detected    |

|      |               |           |           |                                                                              |                                                                                                                                           |         |    |         |    |             |             |             |             |          |             |             |             |
|------|---------------|-----------|-----------|------------------------------------------------------------------------------|-------------------------------------------------------------------------------------------------------------------------------------------|---------|----|---------|----|-------------|-------------|-------------|-------------|----------|-------------|-------------|-------------|
| 3123 | A_33_P3361417 | C6orf57   | Hs.418495 | chromosome 6 open reading frame 57                                           | Homo sapiens chromosome 6 open reading frame 57 (C6orf57), mRNA [NM_145267]                                                               | 2.18171 | up | 2.47527 | up | 1736.42880  | 824.12476   | 1263.12110  | 449.97488   | Detected | Detected    | Detected    | Detected    |
| 3124 | A_32_P175715  | MEIG1     | Hs.257249 | meiosis expressed gene 1 homolog (mouse)                                     | Homo sapiens meiosis expressed gene 1 homolog (mouse) (MEIG1), mRNA [NM_001080836]                                                        | 2.18161 | up | 2.06776 | up | 77.52650    | 36.79655    | 61.36122    | 26.16729    | Detected | Detected    | Detected    | Detected    |
| 3125 | A_33_P3779229 | GK5       | Hs.135904 | glycerol kinase 5 (putative)                                                 | Homo sapiens glycerol kinase 5 (putative) (GK5), mRNA [NM_001039547]                                                                      | 2.18160 | up | 2.20723 | up | 201.06330   | 95.43150    | 131.95859   | 52.71764    | Detected | Detected    | Detected    | Detected    |
| 3126 | A_24_P67806   | MTR       | Hs.498187 | 5-methyltetrahydrofolate-homocysteine methyltransferase                      | Homo sapiens 5-methyltetrahydrofolate-homocysteine methyltransferase (MTR), mRNA [NM_000254]                                              | 2.18086 | up | 2.16730 | up | 404.45297   | 192.03223   | 244.24532   | 99.37378    | Detected | Detected    | Detected    | Detected    |
| 3127 | A_33_P3364571 | TNXB      | Hs.485104 | tenascin XB                                                                  | Homo sapiens tenascin XB (TNXB), transcript variant XB, mRNA [NM_019105]                                                                  | 2.18070 | up | 1.49163 | up | 61.74926    | 29.32030    | 61.03250    | 36.07993    | Detected | Detected    | Detected    | Detected    |
| 3128 | A_33_P3341224 | PCTK2     | Hs.506415 | PCTAIRE protein kinase 2                                                     | Homo sapiens PCTAIRE protein kinase 2 (PCTK2), mRNA [NM_002595]                                                                           | 2.17972 | up | 2.28319 | up | 744.30054   | 353.57413   | 535.92790   | 206.98094   | Detected | Detected    | Detected    | Detected    |
| 3129 | A_33_P3286929 |           |           |                                                                              |                                                                                                                                           | 2.17948 | up | 2.17156 | up | 272.62994   | 129.52531   | 231.31178   | 93.92732    | Detected | Detected    | Detected    | Detected    |
| 3130 | A_23_P110492  | MARCH6    | Hs.432862 | membrane-associated ring finger (C3HC4) 6                                    | Homo sapiens membrane-associated ring finger (C3HC4) 6 (MARCH6), mRNA [NM_005865]                                                         | 2.17829 | up | 2.26190 | up | 2207.17380  | 1049.18980  | 1223.10000  | 476.82025   | Detected | Detected    | Detected    | Detected    |
| 3131 | A_23_P65022   | ACADS     | Hs.507076 | acyl-Coenzyme A dehydrogenase, C-2 to C-3 short chain                        | Homo sapiens acyl-Coenzyme A dehydrogenase, C-2 to C-3 short chain (ACADS), nuclear gene encoding mitochondrial protein, mRNA [NM_000017] | 2.17807 | up | 1.71388 | up | 419.87296   | 199.60863   | 287.04620   | 147.68489   | Detected | Detected    | Detected    | Detected    |
| 3132 | A_32_P486620  | IGSF22    | Hs.434152 | immunoglobulin superfamily, member 22                                        | Homo sapiens immunoglobulin superfamily, member 22 (IGSF22), mRNA [NM_173588]                                                             | 2.17775 | up | 2.07249 | up | 20.89318    | 9.93411     | 17.45664    | 7.42735     | Detected | Compromised | Detected    | Compromised |
| 3133 | A_24_P287043  | IFITM2    | Hs.709321 | interferon induced transmembrane protein 2 (1-8D)                            | Homo sapiens interferon induced transmembrane protein 2 (1-8D) (IFITM2), mRNA [NM_006435]                                                 | 2.17741 | up | 2.07713 | up | 36095.73400 | 17165.23000 | 36411.90200 | 15457.72600 | Detected | Detected    | Detected    | Detected    |
| 3134 | A_23_P58676   | C5orf23   | Hs.13528  | chromosome 5 open reading frame 23                                           | Homo sapiens chromosome 5 open reading frame 23 (C5orf23), mRNA [NM_024563]                                                               | 2.17727 | up | 2.17214 | up | 5236.76030  | 2490.47900  | 3325.21100  | 1349.88840  | Detected | Detected    | Detected    | Detected    |
| 3135 | A_23_P89570   | ZMYND15   | Hs.47223  | zinc finger, MYND-type containing 15                                         | Homo sapiens zinc finger, MYND-type containing 15 (ZMYND15), transcript variant 2, mRNA [NM_032265]                                       | 2.17699 | up | 2.47107 | up | 1772.48450  | 843.06024   | 735.01080   | 262.28497   | Detected | Detected    | Detected    | Detected    |
| 3136 | A_33_P3290562 | GLI3      | Hs.21509  | GLI family zinc finger 3                                                     | Homo sapiens GLI family zinc finger 3 (GLI3), mRNA [NM_000168]                                                                            | 2.17686 | up | 2.18411 | up | 5636.14900  | 2680.92550  | 4363.65970  | 1761.74370  | Detected | Detected    | Detected    | Detected    |
| 3137 | A_33_P3268716 | SNX1      | Hs.188634 | sorting nexin 1                                                              | Homo sapiens sorting nexin 1 (SNX1), transcript variant 1, mRNA [NM_003099]                                                               | 2.17663 | up | 2.30866 | up | 1460.96400  | 695.00510   | 1248.79480  | 476.97565   | Detected | Detected    | Detected    | Detected    |
| 3138 | A_33_P3388061 | KRTAP21-2 | Hs.553699 | keratin associated protein 21-2                                              | Homo sapiens keratin associated protein 21-2 (KRTAP21-2), mRNA [NM_181617]                                                                | 2.17655 | up | 4.12114 | up | 14.36426    | 6.83358     | 20.55763    | 4.39867     | Detected | Compromised | Detected    | Compromised |
| 3139 | A_23_P4628    | ZNF606    | Hs.654967 | zinc finger protein 606                                                      | Homo sapiens zinc finger protein 606 (ZNF606), mRNA [NM_025027]                                                                           | 2.17435 | up | 2.24092 | up | 205.93724   | 98.07031    | 166.96725   | 65.70073    | Detected | Detected    | Detected    | Detected    |
| 3140 | A_23_P393645  | ADAMTS13  | Hs.131433 | ADAM metalloproteinase with thrombospondin type 1 motif, 13                  | Homo sapiens ADAM metalloproteinase with thrombospondin type 1 motif, 13 (ADAMTS13), transcript variant 1, mRNA [NM_139025]               | 2.17425 | up | 2.38225 | up | 506.30330   | 241.12080   | 369.24774   | 136.67729   | Detected | Detected    | Detected    | Detected    |
| 3141 | A_23_P159125  | SLC16A5   | Hs.592095 | solute carrier family 16, member 5 (monocarboxylic acid transporter 6)       | Homo sapiens solute carrier family 16, member 5 (monocarboxylic acid transporter 6) (SLC16A5), mRNA [NM_004695]                           | 2.17391 | up | 2.21672 | up | 13275.01100 | 6323.04930  | 11959.81200 | 4757.49760  | Detected | Detected    | Detected    | Detected    |
| 3142 | A_24_P188377  | CD55      | Hs.126517 | CD55 molecule, decay accelerating factor for complement (Cromer blood group) | Homo sapiens CD55 molecule, decay accelerating factor for complement (Cromer blood group) (CD55), transcript variant 1, mRNA [NM_000574]  | 2.17315 | up | 2.07591 | up | 1973.88620  | 940.51420   | 1859.15170  | 789.71790   | Detected | Detected    | Detected    | Detected    |
| 3143 | A_23_P427122  | ART5      | Hs.125680 | ADP-ribosyltransferase 5                                                     | Homo sapiens ADP-ribosyltransferase 5 (ART5), transcript variant 1, mRNA [NM_003017]                                                      | 2.17248 | up | 1.45008 | up | 48.79375    | 23.25640    | 41.71713    | 25.36815    | Detected | Detected    | Detected    | Detected    |
| 3144 | A_23_P161424  | PLXDC2    | Hs.658134 | plexin domain containing 2                                                   | Homo sapiens plexin domain containing 2 (PLXDC2), mRNA [NM_032812]                                                                        | 2.17146 | up | 2.37720 | up | 60.57085    | 28.88324    | 36.01918    | 13.36082    | Detected | Detected    | Detected    | Detected    |
| 3145 | A_33_P3387365 | PXMP4     | Hs.654857 | peroxisomal membrane protein 4, 24kDa                                        | Homo sapiens peroxisomal membrane protein 4, 24kDa (PXMP4), transcript variant 1, mRNA [NM_007238]                                        | 2.17107 | up | 2.37659 | up | 730.81330   | 348.55026   | 583.65326   | 216.55357   | Detected | Detected    | Detected    | Detected    |
| 3146 | A_24_P159837  |           |           |                                                                              | Zinc finger protein 302 (ZNF135-like)(ZNF140-like) [Source:UniProtKB/Swiss-Prot;Acc:O09R11] [ENST00000221282]                             | 2.17069 | up | 2.21023 | up | 2067.85570  | 986.40570   | 1543.27010  | 615.70000   | Detected | Detected    | Detected    | Detected    |
| 3147 | A_33_P3210358 |           |           |                                                                              |                                                                                                                                           | 2.17029 | up | 4.97848 | up | 97.83165    | 46.67620    | 81.06834    | 14.35888    | Detected | Detected    | Detected    | Detected    |
| 3148 | A_33_P3358898 | SSCS5D    | Hs.554182 | scavenger receptor cysteine-rich glycoprotein                                | Homo sapiens scavenger receptor cysteine-rich glycoprotein (SSCS5D), mRNA [NM_001144950]                                                  | 2.16932 | up | 2.03438 | up | 2906.18430  | 1387.17850  | 2920.43700  | 1265.84940  | Detected | Detected    | Detected    | Detected    |
| 3149 | A_33_P3243449 | CD70      | Hs.501497 | CD70 molecule                                                                | Homo sapiens CD70 molecule (CD70), mRNA [NM_001252]                                                                                       | 2.16892 | up | 2.81193 | up | 86.28574    | 41.19351    | 54.15869    | 16.98358    | Detected | Detected    | Detected    | Detected    |
| 3150 | A_33_P3405004 | NFXL1     | Hs.646325 | nuclear transcription factor, X-box binding-like 1                           | Homo sapiens nuclear transcription factor, X-box binding-like 1 (NFXL1), mRNA [NM_152995]                                                 | 2.16834 | up | 2.18730 | up | 3586.98170  | 1712.91190  | 2607.00020  | 1050.98900  | Detected | Detected    | Detected    | Detected    |
| 3151 | A_24_P29594   | HBS1L     | Hs.378532 | HBS1-like (S. cerevisiae)                                                    | Homo sapiens HBS1-like (S. cerevisiae) (HBS1L), transcript variant 1, mRNA [NM_006620]                                                    | 2.16731 | up | 1.94845 | up | 57.18043    | 27.31862    | 13.02524    | 5.89470     | Detected | Detected    | Compromised | Compromised |
| 3152 | A_23_P377214  | HEXIM2    | Hs.56382  | hexamethylene bis-acetamide inducible 2                                      | Homo sapiens hexamethylene bis-acetamide inducible 2 (HEXIM2), mRNA [NM_144608]                                                           | 2.16667 | up | 2.08265 | up | 3774.06030  | 1803.63340  | 2692.84890  | 1140.14650  | Detected | Detected    | Detected    | Detected    |
| 3153 | A_24_P45005   | NPEPL1    | Hs.654868 | aminopeptidase-like 1                                                        | Homo sapiens aminopeptidase-like 1 (NPEPL1), mRNA [NM_024663]                                                                             | 2.16477 | up | 1.94280 | up | 14713.02900 | 7037.57570  | 11568.40900 | 5250.63230  | Detected | Detected    | Detected    | Detected    |

|      |               |              |           |                                                                                   |                                                                                                                                          |         |    |         |    |             |             |             |             |             |             |          |             |
|------|---------------|--------------|-----------|-----------------------------------------------------------------------------------|------------------------------------------------------------------------------------------------------------------------------------------|---------|----|---------|----|-------------|-------------|-------------|-------------|-------------|-------------|----------|-------------|
| 3154 | A_23_P49009   | LPCAT4       | Hs.352614 | lysophosphatidylcholine acyltransferase 4                                         | Homo sapiens lysophosphatidylcholine acyltransferase 4 (LPCAT4), mRNA [NM_153613]                                                        | 2.16435 | up | 2.32190 | up | 167.36717   | 80.07129    | 206.34229   | 78.36275    | Detected    | Detected    | Detected | Detected    |
| 3155 | A_24_P365975  | COL8A2       | Hs.353001 | collagen, type VIII, alpha 2                                                      | Homo sapiens collagen, type VIII, alpha 2 (COL8A2), mRNA [NM_005202]                                                                     | 2.16393 | up | 2.08822 | up | 2195.47300  | 1050.55070  | 1470.97910  | 621.14886   | Detected    | Detected    | Detected | Detected    |
| 3156 | A_23_P143484  | PIGP         | Hs.656565 | phosphatidylinositol glycan anchor biosynthesis, class P                          | Homo sapiens phosphatidylinositol glycan anchor biosynthesis, class P (PIGP), transcript variant 1, mRNA [NM_153681]                     | 2.16323 | up | 2.32908 | up | 1301.41830  | 622.94040   | 1166.26680  | 441.54860   | Detected    | Detected    | Detected | Detected    |
| 3157 | A_32_P66905   | KGFLP2       |           | keratinocyte growth factor-like protein 2                                         | Homo sapiens keratinocyte growth factor-like protein 2 (KGFLP2), non-coding RNA [NR_003670]                                              | 2.16297 | up | 2.15932 | up | 628.43054   | 300.84265   | 366.38525   | 149.61860   | Detected    | Detected    | Detected | Detected    |
| 3158 | A_23_P99811   | MDP1         | Hs.220963 | magnesium-dependent phosphatase 1                                                 | Homo sapiens magnesium-dependent phosphatase 1 (MDP1), mRNA [NM_138476]                                                                  | 2.16074 | up | 2.27177 | up | 5811.06640  | 2784.75500  | 4632.14750  | 1797.97310  | Detected    | Detected    | Detected | Detected    |
| 3159 | A_23_P346006  | CCPG1        | Hs.285051 | cell cycle progression 1                                                          | Homo sapiens cell cycle progression 1 (CCPG1), transcript variant 2, mRNA [NM_020739]                                                    | 2.15986 | up | 2.34490 | up | 600.28296   | 287.78223   | 525.81525   | 197.73125   | Detected    | Detected    | Detected | Detected    |
| 3160 | A_33_P3286349 | C19orf51     | Hs.351582 | chromosome 19 open reading frame 51                                               | Homo sapiens chromosome 19 open reading frame 51 (C19orf51), mRNA [NM_178837]                                                            | 2.15935 | up | 5.66484 | up | 50.80563    | 24.36252    | 60.23245    | 9.37581     | Detected    | Detected    | Detected | Compromised |
| 3161 | A_23_P144622  | GNPDA1       | Hs.633853 | glucosamine-6-phosphate deaminase 1                                               | Homo sapiens glucosamine-6-phosphate deaminase 1 (GNPDA1), mRNA [NM_005471]                                                              | 2.15911 | up | 2.16944 | up | 1547.27750  | 742.03830   | 1540.01110  | 625.95374   | Detected    | Detected    | Detected | Detected    |
| 3162 | A_32_P107493  | C16orf55     | Hs.655171 | chromosome 16 open reading frame 55                                               | Homo sapiens chromosome 16 open reading frame 55 (C16orf55), mRNA [NM_153025]                                                            | 2.15832 | up | 2.36653 | up | 134.84169   | 64.69071    | 99.47999    | 37.06722    | Detected    | Detected    | Detected | Detected    |
| 3163 | A_23_P126528  | KCNA10       | Hs.248140 | potassium voltage-gated channel, shaker-related subfamily, member 10              | Homo sapiens potassium voltage-gated channel, shaker-related subfamily, member 10 (KCNA10), mRNA [NM_005549]                             | 2.15808 | up | 1.22072 | up | 8.27743     | 3.97157     | 14.64676    | 10.58012    | Compromised | Compromised | Detected | Compromised |
| 3164 | A_33_P3386237 | LOC100132529 | Hs.710296 | hypothetical LOC100132529                                                         | PREDICTED: Homo sapiens hypothetical LOC100132529 (LOC100132529), mRNA [XM_001717495]                                                    | 2.15744 | up | 2.33252 | up | 130.81581   | 62.78484    | 116.78588   | 44.14994    | Detected    | Detected    | Detected | Detected    |
| 3165 | A_23_P63289   | SSU72        | Hs.657061 | SSU72 RNA polymerase II CTD phosphatase homolog (S. cerevisiae)                   | Homo sapiens SSU72 RNA polymerase II CTD phosphatase homolog (S. cerevisiae) (SSU72), mRNA [NM_014188]                                   | 2.15710 | up | 2.08429 | up | 17074.95500 | 8196.37100  | 12517.89900 | 5295.89160  | Detected    | Detected    | Detected | Detected    |
| 3166 | A_33_P3350413 |              |           |                                                                                   |                                                                                                                                          | 2.15670 | up | 2.35466 | up | 399.90320   | 191.99634   | 271.98660   | 101.85540   | Detected    | Detected    | Detected | Detected    |
| 3167 | A_23_P137423  | IGSF8        | Hs.332012 | immunoglobulin superfamily, member 8                                              | Homo sapiens immunoglobulin superfamily, member 8 (IGSF8), mRNA [NM_028661]                                                              | 2.15610 | up | 2.10491 | up | 558.54596   | 268.23972   | 640.46640   | 268.30515   | Detected    | Detected    | Detected | Detected    |
| 3168 | A_23_P111804  | PARP12       | Hs.12646  | poly (ADP-ribose) polymerase family, member 12                                    | Homo sapiens poly (ADP-ribose) polymerase family, member 12 (PARP12), mRNA [NM_022750]                                                   | 2.15607 | up | 2.15180 | up | 778.31067   | 373.78537   | 599.01886   | 245.47343   | Detected    | Detected    | Detected | Detected    |
| 3169 | A_23_P5221    | ZNF333       | Hs.515215 | zinc finger protein 333                                                           | Homo sapiens zinc finger protein 333 (ZNF333), mRNA [NM_032433]                                                                          | 2.15583 | up | 2.23619 | up | 417.73486   | 200.64056   | 368.29434   | 145.22841   | Detected    | Detected    | Detected | Detected    |
| 3170 | A_24_P225635  | HNRPLL       |           | heterogeneous nuclear ribonucleoprotein L-like                                    | Heterogeneous nuclear ribonucleoprotein L-like (Stromal RNA-regulating factor) [Source:UniProtKB/Swiss-Prot;Acc:Q6WVY6] [ENST0000449105] | 2.15522 | up | 2.37962 | up | 217.07750   | 104.29340   | 109.40680   | 40.54174    | Detected    | Detected    | Detected | Detected    |
| 3171 | A_33_P3352970 | IRAK2        | Hs.449207 | interleukin-1 receptor-associated kinase 2                                        | Homo sapiens interleukin-1 receptor-associated kinase 2 (IRAK2), mRNA [NM_001570]                                                        | 2.15455 | up | 2.28294 | up | 3700.22020  | 1778.29380  | 2705.62260  | 1045.05110  | Detected    | Detected    | Detected | Detected    |
| 3172 | A_23_P162300  | IRAK3        | Hs.369265 | interleukin-1 receptor-associated kinase 3                                        | Homo sapiens interleukin-1 receptor-associated kinase 3 (IRAK3), transcript variant 1, mRNA [NM_007199]                                  | 2.15444 | up | 1.92696 | up | 573.99450   | 275.87173   | 467.30026   | 213.84021   | Detected    | Detected    | Detected | Detected    |
| 3173 | A_23_P209625  | CYP1B1       | Hs.154654 | cytochrome P450, family 1, subfamily B, polypeptide 1                             | Homo sapiens cytochrome P450, family 1, subfamily B, polypeptide 1 (CYP1B1), mRNA [NM_000104]                                            | 2.15391 | up | 2.00275 | up | 9671.18000  | 4649.27440  | 6000.36500  | 2641.90530  | Detected    | Detected    | Detected | Detected    |
| 3174 | A_23_P98605   | UBXN1        | Hs.351296 | UBX domain protein 1                                                              | Homo sapiens UBX domain protein 1 (UBXN1), mRNA [NM_015853]                                                                              | 2.15377 | up | 1.96445 | up | 74022.70000 | 35587.60500 | 58818.16400 | 26401.90600 | Detected    | Detected    | Detected | Detected    |
| 3175 | A_24_P373174  | RAB27A       | Hs.654978 | RAB27A, member RAS oncogene family                                                | Homo sapiens RAB27A, member RAS oncogene family (RAB27A), transcript variant 1, mRNA [NM_004580]                                         | 2.15261 | up | 2.21499 | up | 899.51200   | 432.68878   | 749.47030   | 298.36588   | Detected    | Detected    | Detected | Detected    |
| 3176 | A_24_P211565  | C1QTNF6      | Hs.720142 | C1q and tumor necrosis factor related protein 6                                   | Homo sapiens C1q and tumor necrosis factor related protein 6 (C1QTNF6), transcript variant 1, mRNA [NM_031910]                           | 2.15180 | up | 2.06161 | up | 1158.20450  | 557.33590   | 1386.24350  | 592.92316   | Detected    | Detected    | Detected | Detected    |
| 3177 | A_24_P274615  | ARRDC3       | Hs.24684  | arrestin domain containing 3                                                      | Homo sapiens arrestin domain containing 3 (ARRDC3), mRNA [NM_020801]                                                                     | 2.15098 | up | 2.28054 | up | 5402.46340  | 2600.69530  | 2439.44380  | 943.23130   | Detected    | Detected    | Detected | Detected    |
| 3178 | A_33_P3293668 | DENND4C      | Hs.249591 | DENN/MADD domain containing 4C                                                    | Homo sapiens DENN/MADD domain containing 4C (DENND4C), mRNA [NM_017925]                                                                  | 2.15056 | up | 2.20934 | up | 4741.14400  | 2282.78760  | 3270.76880  | 1305.42820  | Detected    | Detected    | Detected | Detected    |
| 3179 | A_33_P3419945 | LOC100128562 | Hs.667110 | hypothetical protein LOC100128562                                                 | Homo sapiens cDNA FLJ27214 fis, clone SYN03752, [AK130724]                                                                               | 2.15050 | up | 3.33693 | up | 1637.61610  | 788.50560   | 119.97112   | 31.70260    | Detected    | Detected    | Detected | Detected    |
| 3180 | A_33_P3358626 | TAF4B        | Hs.369519 | TAF4b RNA polymerase II, TATA box binding protein (TBP)-associated factor, 105kDa | Homo sapiens TAF4b RNA polymerase II, TATA box binding protein (TBP)-associated factor, 105kDa (TAF4B), mRNA [NM_005640]                 | 2.15021 | up | 2.52163 | up | 529.10736   | 254.79778   | 418.65515   | 146.39996   | Detected    | Detected    | Detected | Detected    |
| 3181 | A_24_P141214  | STOM         | Hs.253903 | stomatin                                                                          | Homo sapiens stomatin (STOM), transcript variant 2, mRNA [NM_198194]                                                                     | 2.14932 | up | 1.90468 | up | 14892.19100 | 7174.47070  | 10274.07700 | 4756.47560  | Detected    | Detected    | Detected | Detected    |
| 3182 | A_23_P14302   | C14orf139    | Hs.41502  | chromosome 14 open reading frame 139                                              | Homo sapiens chromosome 14 open reading frame 139 (C14orf139), non-coding RNA [NR_026779]                                                | 2.14889 | up | 2.44251 | up | 4851.15330  | 2337.56710  | 3064.74950  | 1106.42910  | Detected    | Detected    | Detected | Detected    |
| 3183 | A_33_P3299811 | LQK1         | Hs.552649 | hypothetical LOC642946                                                            | Homo sapiens hypothetical LOC642946 (LQK1), transcript variant 2, non-coding RNA [NR_027286]                                             | 2.14882 | up | 2.31789 | up | 85.05660    | 40.98655    | 86.16750    | 32.78058    | Detected    | Detected    | Detected | Detected    |

|      |               |           |           |                                                                                    |                                                                                                                                                     |         |    |         |    |             |             |             |             |          |             |             |             |
|------|---------------|-----------|-----------|------------------------------------------------------------------------------------|-----------------------------------------------------------------------------------------------------------------------------------------------------|---------|----|---------|----|-------------|-------------|-------------|-------------|----------|-------------|-------------|-------------|
| 3184 | A_23_P212089  | NFKBIZ    | Hs.319171 | nuclear factor of kappa light polypeptide gene enhancer in B-cells inhibitor, zeta | Homo sapiens nuclear factor of kappa light polypeptide gene enhancer in B-cells inhibitor, zeta (NFKBIZ), transcript variant 1, mRNA [NM_031419]    | 2.14631 | up | 2.38612 | up | 604.77290   | 291.76453   | 512.55600   | 189.41525   | Detected | Detected    | Detected    | Detected    |
| 3185 | A_23_P112289  | TMOD1     | Hs.494595 | tropomodulin 1                                                                     | Homo sapiens tropomodulin 1 (TMOD1), transcript variant 1, mRNA [NM_003275]                                                                         | 2.14619 | up | 1.24839 | up | 19.13916    | 9.23398     | 18.46538    | 13.04287    | Detected | Compromised | Detected    | Detected    |
| 3186 | A_24_P285032  | IDS       | Hs.460960 | iduronate 2-sulfatase                                                              | Homo sapiens iduronate 2-sulfatase (IDS), transcript variant 2, mRNA [NM_006123]                                                                    | 2.14573 | up | 2.27560 | up | 452.59320   | 218.40645   | 517.00390   | 200.33792   | Detected | Detected    | Detected    | Detected    |
| 3187 | A_33_P3329686 | SEPT5     | Hs.283743 | septin 5                                                                           | Homo sapiens septin 5 (SEPT5), mRNA [NM_002688]                                                                                                     | 2.14523 | up | 1.61691 | up | 93.61037    | 45.18395    | 101.79849   | 55.51631    | Detected | Detected    | Detected    | Detected    |
| 3188 | A_33_P3332937 | LOC650794 | Hs.147563 | similar to FRAS1 related extracellular matrix protein 2                            | PREDICTED: Homo sapiens similar to FRAS1 related extracellular matrix protein 2 (LOC650794), mRNA [XM_001716126]                                    | 2.14455 | up | 6.27206 | up | 36.33703    | 17.54474    | 22.09297    | 3.10606     | Detected | Detected    | Detected    | Compromised |
| 3189 | A_33_P3386242 | CNKSR1    | Hs.16232  | connector enhancer of kinase suppressor of Ras 1                                   | Homo sapiens connector enhancer of kinase suppressor of Ras 1 (CNKSR1), transcript variant 1, mRNA [NM_006314]                                      | 2.14396 | up | 1.87552 | up | 35.24744    | 17.02335    | 23.37755    | 10.99112    | Detected | Compromised | Detected    | Compromised |
| 3190 | A_23_P50389   | NAT14     | Hs.719312 | N-acetyltransferase 14 (GCN5-related, putative)                                    | Homo sapiens N-acetyltransferase 14 (GCN5-related, putative) (NAT14), mRNA [NM_020378]                                                              | 2.14394 | up | 2.36402 | up | 4181.36800  | 2019.47680  | 4534.95800  | 1691.56290  | Detected | Detected    | Detected    | Detected    |
| 3191 | A_23_P207125  | NLGN2     | Hs.26229  | neuroligin 2                                                                       | Homo sapiens neuroligin 2 (NLGN2), mRNA [NM_020795]                                                                                                 | 2.14371 | up | 2.06404 | up | 4248.26200  | 2052.00590  | 3368.05270  | 1441.40060  | Detected | Detected    | Detected    | Detected    |
| 3192 | A_23_P27744   | FBXO46    | Hs.128702 | F-box protein 46                                                                   | Homo sapiens F-box protein 46 (FBXO46), mRNA [NM_001080469]                                                                                         | 2.14332 | up | 2.11077 | up | 2218.09520  | 1071.58230  | 1520.51660  | 635.20860   | Detected | Detected    | Detected    | Detected    |
| 3193 | A_23_P24716   | TMEM132A  | Hs.118552 | transmembrane protein 132A                                                         | Homo sapiens transmembrane protein 132A (TMEM132A), transcript variant 1, mRNA [NM_017670]                                                          | 2.14261 | up | 1.80357 | up | 12853.77200 | 6211.85350  | 10630.48800 | 5197.38670  | Detected | Detected    | Detected    | Detected    |
| 3194 | A_23_P421423  | TNFAIP2   | Hs.525607 | tumor necrosis factor, alpha-induced protein 2                                     | Homo sapiens tumor necrosis factor, alpha-induced protein 2 (TNFAIP2), mRNA [NM_006291]                                                             | 2.14111 | up | 1.92974 | up | 19523.68000 | 9441.80800  | 15985.91600 | 7304.73730  | Detected | Detected    | Detected    | Detected    |
| 3195 | A_23_P92614   | HELQ      | Hs.480101 | helicase, POLQ-like                                                                | Homo sapiens helicase, POLQ-like (HELQ), mRNA [NM_133636]                                                                                           | 2.14062 | up | 2.10639 | up | 608.67285   | 294.42618   | 439.78220   | 184.10445   | Detected | Detected    | Detected    | Detected    |
| 3196 | A_24_P1113131 | BZRAP1    | Hs.112499 | benzodiazepine receptor (peripheral) associated protein 1                          | Homo sapiens benzodiazepine receptor (peripheral) associated protein 1 (BZRAP1), transcript variant 1, mRNA [NM_004758]                             | 2.14047 | up | 5.31135 | up | 64.67962    | 31.28900    | 26.05792    | 4.32614     | Detected | Detected    | Detected    | Compromised |
| 3197 | A_24_P487736  | CXorf23   | Hs.28896  | chromosome X open reading frame 23                                                 | Homo sapiens chromosome X open reading frame 23 (CXorf23), mRNA [NM_139276]                                                                         | 2.14038 | up | 1.90982 | up | 429.28625   | 207.67703   | 268.02400   | 123.75030   | Detected | Detected    | Detected    | Detected    |
| 3198 | A_33_P3322230 | FLJ31945  | Hs.183953 | hypothetical protein LOC440137                                                     | PREDICTED: Homo sapiens hypothetical protein LOC440137 (FLJ31945), mRNA [XM_001716811]                                                              | 2.14036 | up | 2.14626 | up | 54.91789    | 26.56804    | 24.25895    | 9.96677     | Detected | Detected    | Detected    | Compromised |
| 3199 | A_23_P88817   | MLYCD     | Hs.644610 | malonyl-CoA decarboxylase                                                          | Homo sapiens malonyl-CoA decarboxylase (MLYCD), nuclear gene encoding mitochondrial protein, mRNA [NM_012213]                                       | 2.13983 | up | 1.98643 | up | 462.10703   | 223.61217   | 495.25223   | 219.84604   | Detected | Detected    | Detected    | Detected    |
| 3200 | A_23_P380881  | ANKRD13B  | Hs.662164 | ankyrin repeat domain 13B                                                          | Homo sapiens ankyrin repeat domain 13B (ANKRD13B), mRNA [NM_152345]                                                                                 | 2.13973 | up | 2.30111 | up | 75.89824    | 36.72879    | 80.31434    | 30.77660    | Detected | Detected    | Detected    | Detected    |
| 3201 | A_24_P122337  | SYTL4     | Hs.592224 | synaptotagmin-like 4                                                               | Homo sapiens synaptotagmin-like 4 (SYTL4), transcript variant 1, mRNA [NM_080737]                                                                   | 2.13757 | up | 2.05116 | up | 192.51208   | 93.25483    | 137.57982   | 59.14547    | Detected | Detected    | Detected    | Detected    |
| 3202 | A_33_P3251480 | MAPKSP1   | Hs.433332 | MAPK scaffold protein 1                                                            | Homo sapiens MAPK scaffold protein 1 (MAPKSP1), transcript variant 1, mRNA [NM_021970]                                                              | 2.13672 | up | 1.71480 | up | 17.55518    | 8.50727     | 14.09272    | 7.24681     | Detected | Compromised | Compromised | Compromised |
| 3203 | A_23_P204736  | GPD1      | Hs.524418 | glycerol-3-phosphate dehydrogenase 1 (soluble)                                     | Homo sapiens glycerol-3-phosphate dehydrogenase 1 (soluble) (GPD1), mRNA [NM_005276]                                                                | 2.13629 | up | 1.12870 | up | 85.94099    | 41.65553    | 29.70165    | 23.20415    | Detected | Detected    | Detected    | Detected    |
| 3204 | A_33_P3216601 | FHIT      | Hs.655995 | fragile histidine triad gene                                                       | Homo sapiens fragile histidine triad gene (FHIT), transcript variant 1, mRNA [NM_002012]                                                            | 2.13624 | up | 2.64866 | up | 22.58867    | 10.94896    | 25.03205    | 8.33366     | Detected | Compromised | Detected    | Compromised |
| 3205 | A_24_P920646  |           | Hs.260074 |                                                                                    | Cytochrome P450 19A1 (EC 1.14.14.13)(CYP19A1)(Aromatase)(Estrogen synthetase)(P-450AROM) [Source:UniProtKB/Swiss-Prot;Acc:P11511] [ENST00000405913] | 2.13616 | up | 6.00521 | up | 35.04639    | 16.98896    | 20.52118    | 3.01328     | Detected | Compromised | Detected    | Compromised |
| 3206 | A_24_P280113  | IL13RA1   | Hs.496646 | interleukin 13 receptor, alpha 1                                                   | Homo sapiens interleukin 13 receptor, alpha 1 (IL13RA1), mRNA [NM_0015560]                                                                          | 2.13493 | up | 2.06055 | up | 48419.90200 | 23484.04000 | 33455.41400 | 14316.92700 | Detected | Detected    | Detected    | Detected    |
| 3207 | A_32_P110016  | LOC727869 | Hs.647210 | hypothetical LOC727869                                                             | PREDICTED: Homo sapiens hypothetical LOC727869, mRNA [XM_001128267]                                                                                 | 2.13476 | up | 5.31240 | up | 26.83171    | 13.01468    | 14.70460    | 2.44078     | Detected | Compromised | Detected    | Compromised |
| 3208 | A_33_P3576853 | LOC254128 | Hs.712685 | hypothetical protein LOC254128                                                     | Homo sapiens cDNA FLJ40945 fis. clone LTERJ2008747 [AK098264]                                                                                       | 2.13451 | up | 1.74805 | up | 90.14577    | 43.73006    | 110.16708   | 55.57293    | Detected | Detected    | Detected    | Detected    |
| 3209 | A_23_P139669  | SLC2A3    | Hs.419240 | solute carrier family 2 (facilitated glucose transporter), member 3                | Homo sapiens solute carrier family 2 (facilitated glucose transporter), member 3 (SLC2A3), mRNA [NM_006931]                                         | 2.13352 | up | 2.05521 | up | 305.25296   | 148.14822   | 183.16533   | 78.58719    | Detected | Detected    | Detected    | Detected    |
| 3210 | A_24_P46130   | ACPP      | Hs.433060 | acid phosphatase, prostate                                                         | Homo sapiens acid phosphatase, prostate (ACPP), transcript variant 1, mRNA [NM_001099]                                                              | 2.13339 | up | 1.86613 | up | 133.56331   | 64.82611    | 78.06742    | 36.88866    | Detected | Detected    | Detected    | Detected    |
| 3211 | A_23_P121898  | PARP8     | Hs.369581 | poly (ADP-ribose) polymerase family, member 8                                      | Homo sapiens poly (ADP-ribose) polymerase family, member 8 (PARP8), mRNA [NM_024615]                                                                | 2.13304 | up | 1.96834 | up | 91.81804    | 44.57198    | 71.21668    | 31.90408    | Detected | Detected    | Detected    | Detected    |
| 3212 | A_24_P305570  | RIN2      | Hs.472270 | Ras and Rab interactor 2                                                           | Homo sapiens Ras and Rab interactor 2 (RIN2), mRNA [NM_018993]                                                                                      | 2.13185 | up | 2.26554 | up | 18160.27500 | 8820.61000  | 13562.50400 | 5278.78300  | Detected | Detected    | Detected    | Detected    |
| 3213 | A_23_P94095   | ANKRD46   | Hs.530199 | ankyrin repeat domain 46                                                           | Homo sapiens ankyrin repeat domain 46 (ANKRD46), mRNA [NM_198401]                                                                                   | 2.13126 | up | 2.36520 | up | 554.30210   | 269.30377   | 352.58594   | 131.45080   | Detected | Detected    | Detected    | Detected    |

|      |               |           |           |                                                                   |                                                                                                                                                           |         |    |         |    |             |             |             |             |          |             |             |             |
|------|---------------|-----------|-----------|-------------------------------------------------------------------|-----------------------------------------------------------------------------------------------------------------------------------------------------------|---------|----|---------|----|-------------|-------------|-------------|-------------|----------|-------------|-------------|-------------|
| 3214 | A_33_P3364060 | HR        | Hs.272367 | hairless homolog (mouse)                                          | Homo sapiens hairless homolog (mouse) (HR), transcript variant 1, mRNA [NM_005144]                                                                        | 2.13076 | up | 3.56265 | up | 3319.86740  | 1613.31260  | 2510.93040  | 621.47906   | Detected | Detected    | Detected    | Detected    |
| 3215 | A_33_P3261167 | GNS       | Hs.334534 | glucosamine (N-acetyl)-6-sulfatase                                | Homo sapiens glucosamine (N-acetyl)-6-sulfatase (GNS), mRNA [NM_002076]                                                                                   | 2.13076 | up | 1.91835 | up | 46090.59000 | 22398.13300 | 38425.40000 | 17662.64500 | Detected | Detected    | Detected    | Detected    |
| 3216 | A_33_P3371954 | IGSF8     | Hs.332012 | immunoglobulin superfamily, member 8                              | Homo sapiens immunoglobulin superfamily, member 8 (IGSF8), mRNA [NM_052893]                                                                               | 2.13067 | up | 1.84699 | up | 225.13606   | 109.41107   | 272.99155   | 130.33140   | Detected | Detected    | Detected    | Detected    |
| 3217 | A_33_P3243929 |           |           |                                                                   |                                                                                                                                                           | 2.13051 | up | 1.37237 | up | 79.17230    | 38.47890    | 5.46459     | 3.51118     | Detected | Detected    | Compromised | Compromised |
| 3218 | A_33_P3340014 | TRO       | Hs.633653 | trophinin                                                         | Homo sapiens trophinin (TRO), transcript variant 3, mRNA [NM_016157]                                                                                      | 2.12974 | up | 2.44559 | up | 213.68541   | 103.89200   | 210.05148   | 75.73684    | Detected | Detected    | Detected    | Detected    |
| 3219 | A_24_P391230  | CYYR1     | Hs.37445  | cysteine/tyrosine-rich 1                                          | Homo sapiens cysteine/tyrosine-rich 1 (CYYR1), mRNA [NM_052954]                                                                                           | 2.12908 | up | 2.65552 | up | 48.30590    | 23.49316    | 44.55092    | 14.79356    | Detected | Detected    | Detected    | Detected    |
| 3220 | A_33_P3371889 | NUAK1     | Hs.524692 | NUAK family, SNF1-like kinase, 1                                  | Homo sapiens NUAK family, SNF1-like kinase, 1 (NUAK1), mRNA [NM_144658]                                                                                   | 2.12802 | up | 1.52520 | up | 24.93593    | 12.13341    | 12.90229    | 7.45943     | Detected | Compromised | Compromised | Compromised |
| 3221 | A_23_P102842  | NFS1      | Hs.194692 | NFS1 nitrogen fixation 1 homolog (S. cerevisiae)                  | Homo sapiens NFS1 nitrogen fixation 1 homolog (S. cerevisiae) (NFS1), nuclear gene encoding mitochondrial protein, mRNA [NM_021100]                       | 2.12742 | up | 2.07165 | up | 2517.09600  | 1225.12290  | 2233.55620  | 950.70550   | Detected | Detected    | Detected    | Detected    |
| 3222 | A_23_P148584  | DOCK11    | Hs.368203 | dedicator of cytokinesis 11                                       | Homo sapiens dedicator of cytokinesis 11 (DOCK11), mRNA [NM_144658]                                                                                       | 2.12702 | up | 2.33671 | up | 3784.85060  | 1842.51510  | 2198.25100  | 829.54120   | Detected | Detected    | Detected    | Detected    |
| 3223 | A_33_P3251841 | DSEL      | Hs.124673 | dermatan sulfate epimerase-like                                   | Homo sapiens dermatan sulfate epimerase-like (DSEL), mRNA [NM_032160]                                                                                     | 2.12651 | up | 2.18357 | up | 4959.06450  | 2414.71240  | 2780.56270  | 1122.87330  | Detected | Detected    | Detected    | Detected    |
| 3224 | A_23_P131375  | PQLC3     | Hs.274415 | PQ loop repeat containing 3                                       | Homo sapiens PQ loop repeat containing 3 (PQLC3), mRNA [NM_152391]                                                                                        | 2.12636 | up | 2.23661 | up | 2300.94340  | 1120.47680  | 1956.06770  | 771.18690   | Detected | Detected    | Detected    | Detected    |
| 3225 | A_33_P3508717 | LOC729678 | Hs.348292 | hypothetical protein LOC729678                                    | Homo sapiens hypothetical protein LOC729678 (LOC729678), non-coding RNA [NR_027183]                                                                       | 2.12555 | up | 2.02218 | up | 1390.70420  | 677.48140   | 1153.56800  | 503.02300   | Detected | Detected    | Detected    | Detected    |
| 3226 | A_23_P153098  | HDHD2     | Hs.465041 | haloacid dehalogenase-like hydrolase domain containing 2          | Homo sapiens haloacid dehalogenase-like hydrolase domain containing 2 (HDHD2), mRNA [NM_032124]                                                           | 2.12530 | up | 2.26751 | up | 3714.59620  | 1809.77580  | 3528.47500  | 1372.15870  | Detected | Detected    | Detected    | Detected    |
| 3227 | A_23_P135742  | C1orf170  | Hs.271462 | chromosome 1 open reading frame 170                               | Homo sapiens chromosome 1 open reading frame 170 (C1orf170), non-coding RNA [NR_027693]                                                                   | 2.12506 | up | 4.68264 | up | 35.56104    | 17.32753    | 20.51798    | 3.86375     | Detected | Compromised | Detected    | Compromised |
| 3228 | A_23_P34510   | PHC2      | Hs.524271 | polyhomeotic homolog 2 (Drosophila)                               | Homo sapiens polyhomeotic homolog 2 (Drosophila) (PHC2), transcript variant 1, mRNA [NM_198040]                                                           | 2.12405 | up | 1.65787 | up | 7617.77000  | 3713.61430  | 7480.42300  | 3978.70480  | Detected | Detected    | Detected    | Detected    |
| 3229 | A_24_P186342  | ZFP14     | Hs.35524  | zinc finger protein 14 homolog (mouse)                            | Homo sapiens zinc finger protein 14 homolog (mouse) (ZFP14), mRNA [NM_020917]                                                                             | 2.12351 | up | 7.84806 | up | 37.18010    | 18.12965    | 22.31558    | 2.50733     | Detected | Detected    | Detected    | Compromised |
| 3230 | A_32_P144596  | TNKS      | Hs.370267 | tankyrase, TRF1-interacting ankyrin-related ADP-ribose polymerase | Homo sapiens tankyrase, TRF1-interacting ankyrin-related ADP-ribose polymerase (TNKS), mRNA [NM_003747]                                                   | 2.12312 | up | 2.38484 | up | 627.73220   | 306.14856   | 523.99320   | 193.74545   | Detected | Detected    | Detected    | Detected    |
| 3231 | A_33_P3788772 | LOC200609 | Hs.635880 | hypothetical protein LOC200609                                    | Homo sapiens mRNA: cDNA DKFZ434E221 (from clone DKFZ434E221) [AL137458]                                                                                   | 2.12296 | up | 1.86854 | up | 706.29150   | 344.48900   | 501.61115   | 236.71703   | Detected | Detected    | Detected    | Detected    |
| 3232 | A_24_P98613   | TSPAN14   | Hs.633177 | tetraspanin 14                                                    | Homo sapiens tetraspanin 14 (TSPAN14), transcript variant 1, mRNA [NM_030927]                                                                             | 2.12130 | up | 2.16422 | up | 1398.45800  | 682.62366   | 1216.28870  | 495.56497   | Detected | Detected    | Detected    | Detected    |
| 3233 | A_23_P65278   | NBEA      | Hs.491172 | neurobeachin                                                      | Homo sapiens neurobeachin (NBEA), mRNA [NM_015678]                                                                                                        | 2.12075 | up | 2.03336 | up | 847.98600   | 414.03125   | 574.71280   | 249.23145   | Detected | Detected    | Detected    | Detected    |
| 3234 | A_33_P3422260 |           | Hs.148365 |                                                                   | Putative uncharacterized protein ENSP0000036372 [Source:UniProtKB/TrEMBL;Acc:B7WPJ8] [ENST00000374740]                                                    | 2.12074 | up | 1.79236 | up | 1450.88650  | 708.40076   | 180.22879   | 88.66742    | Detected | Detected    | Detected    | Detected    |
| 3235 | A_33_P3548860 | SEC1      |           | secretory blood group 1                                           | Homo sapiens secretory blood group 1 (SEC1), non-coding RNA [NR_004401]                                                                                   | 2.12018 | up | 1.50504 | up | 50.33355    | 24.58209    | 31.65206    | 18.54473    | Detected | Detected    | Detected    | Detected    |
| 3236 | A_24_P356338  | GABARAPL2 | Hs.461379 | GABA(A) receptor-associated protein-like 2                        | Homo sapiens GABA(A) receptor-associated protein-like 2 (GABARAPL2), mRNA [NM_007285]                                                                     | 2.12004 | up | 2.14885 | up | 7008.46300  | 3423.04400  | 4467.54930  | 1833.28170  | Detected | Detected    | Detected    | Detected    |
| 3237 | A_33_P3292198 | SPAG4L    | Hs.375186 | sperm associated antigen 4-like                                   | Homo sapiens sperm associated antigen 4-like (SPAG4L), mRNA [NM_080675]                                                                                   | 2.11994 | up | 1.82983 | up | 191.56349   | 93.56672    | 55.45942    | 26.72577    | Detected | Detected    | Detected    | Detected    |
| 3238 | A_23_P50646   | LOC390940 | Hs.22049  | similar to R28379.1                                               | Uncharacterized protein ENSP0000244321 Precursor [Source:UniProtKB/Swiss-Prot;Acc:A6NC86] [ENST00000244321]                                               | 2.11961 | up | 2.31546 | up | 536.88120   | 282.17697   | 465.61023   | 177.31725   | Detected | Detected    | Detected    | Detected    |
| 3239 | A_23_P216679  | CDC14B    | Hs.40582  | CDC14 cell division cycle 14 homolog B (S. cerevisiae)            | Homo sapiens CDC14 cell division cycle 14 homolog B (S. cerevisiae) (CDC14B), transcript variant 2, mRNA [NM_033331]                                      | 2.11951 | up | 2.36234 | up | 359.71826   | 175.73616   | 192.26530   | 71.76691    | Detected | Detected    | Detected    | Detected    |
| 3240 | A_33_P3338724 | LENG9     | Hs.590976 | leukocyte receptor cluster (LRC) member 9                         | Homo sapiens leukocyte receptor cluster (LRC) member 9 (LENG9), mRNA [NM_198988]                                                                          | 2.11804 | up | 1.45986 | up | 411.04980   | 200.95248   | 176.01780   | 106.31888   | Detected | Detected    | Detected    | Detected    |
| 3241 | A_24_P224998  |           |           |                                                                   | 60S ribosomal protein L36a (60S ribosomal protein L44)(Cell migration-inducing gene 6 protein) [Source:UniProtKB/Swiss-Prot;Acc:P63881] [ENST00000392994] | 2.11744 | up | 2.21126 | up | 677.19660   | 331.15933   | 456.86157   | 182.18431   | Detected | Detected    | Detected    | Detected    |
| 3242 | A_23_P127460  | SIPA1     | Hs.530477 | signal-induced proliferation-associated 1                         | Homo sapiens signal-induced proliferation-associated 1 (SIPA1), transcript variant 1, mRNA [NM_153253]                                                    | 2.11722 | up | 1.75194 | up | 1620.72770  | 792.64150   | 1803.80990  | 907.89560   | Detected | Detected    | Detected    | Detected    |

|      |               |              |           |                                                                                                                          |                                                                                                                                                                                     |         |    |         |    |             |             |             |             |          |             |             |             |
|------|---------------|--------------|-----------|--------------------------------------------------------------------------------------------------------------------------|-------------------------------------------------------------------------------------------------------------------------------------------------------------------------------------|---------|----|---------|----|-------------|-------------|-------------|-------------|----------|-------------|-------------|-------------|
| 3243 | A_33_P3227284 | OGT          | Hs.405410 | O-linked N-acetylglucosamine (GlcNAc) transferase (UDP-N-acetylglucosamine:polypeptide-N-acetylglucosaminyl transferase) | Homo sapiens O-linked N-acetylglucosamine (GlcNAc) transferase (UDP-N-acetylglucosamine:polypeptide-N-acetylglucosaminyl transferase) (OGT), transcript variant 1, mRNA [NM_181672] | 2.11665 | up | 2.15029 | up | 9193.78900  | 4497.57760  | 7066.98700  | 2898.02900  | Detected | Detected    | Detected    | Detected    |
| 3244 | A_23_P347198  | SP3          | Hs.531587 | Sp3 transcription factor                                                                                                 | Homo sapiens Sp3 transcription factor (SP3), transcript variant 1, mRNA [NM_003111]                                                                                                 | 2.11603 | up | 2.14972 | up | 9267.34500  | 4534.89200  | 5312.06900  | 2178.95430  | Detected | Detected    | Detected    | Detected    |
| 3245 | A_33_P3297444 | ABTB1        | Hs.107812 | ankyrin repeat and BTB (POZ) domain containing 1                                                                         | Homo sapiens ankyrin repeat and BTB (POZ) domain containing 1 (ABTB1), transcript variant 2, mRNA [NM_172927]                                                                       | 2.11537 | up | 1.91441 | up | 9201.92400  | 4504.28120  | 8017.05570  | 3692.70400  | Detected | Detected    | Detected    | Detected    |
| 3246 | A_33_P3351615 |              |           |                                                                                                                          |                                                                                                                                                                                     | 2.11458 | up | 1.80931 | up | 60103.97000 | 29431.48600 | 36331.47700 | 17706.60000 | Detected | Detected    | Detected    | Detected    |
| 3247 | A_33_P3323368 | FLJ39639     | Hs.592092 | hypothetical protein FLJ39639                                                                                            | PREDICTED: Homo sapiens hypothetical protein FLJ39639 [FLJ39639], mRNA [XM_001715751]                                                                                               | 2.11345 | up | 1.98516 | up | 172.18156   | 84.35819    | 98.81339    | 43.89198    | Detected | Detected    | Detected    | Detected    |
| 3248 | A_23_P153853  | ECH1         | Hs.196176 | enoyl Coenzyme A hydratase 1, peroxisomal                                                                                | Homo sapiens enoyl Coenzyme A hydratase 1, peroxisomal (ECH1), mRNA [NM_001398]                                                                                                     | 2.11226 | up | 1.89778 | up | 3190.86820  | 1564.21000  | 3705.49270  | 1721.73010  | Detected | Detected    | Detected    | Detected    |
| 3249 | A_23_P13548   | CHRD2L       | Hs.432379 | chordin-like 2                                                                                                           | Homo sapiens chordin-like 2 (CHRD2L), mRNA [NM_015424]                                                                                                                              | 2.11219 | up | 2.24905 | up | 25.25022    | 12.37841    | 13.76165    | 5.39557     | Detected | Compromised | Detected    | Compromised |
| 3250 | A_32_P507710  | PI4KAP2      | Hs.592456 | phosphatidylinositol 4-kinase, catalytic, alpha pseudogene 2                                                             | Homo sapiens phosphatidylinositol 4-kinase, catalytic, alpha pseudogene 2 (PI4KAP2), non-coding RNA [NR_003700]                                                                     | 2.11209 |    | 1.34729 |    | 345.33215   | 169.29994   | 388.98096   | 254.58572   | Detected | Detected    | Detected    | Detected    |
| 3251 | A_23_P19348   | CUL7         | Hs.520136 | culin 7                                                                                                                  | Homo sapiens culin 7 (CUL7), mRNA [NM_014780]                                                                                                                                       | 2.11193 | up | 1.92052 | up | 639.09440   | 313.34204   | 583.27795   | 267.80670   | Detected | Detected    | Detected    | Detected    |
| 3252 | A_32_P34552   | POLB         | Hs.654484 | polymerase (DNA directed), beta                                                                                          | Homo sapiens polymerase (DNA directed), beta (POLB), mRNA [NM_002890]                                                                                                               | 2.11159 | up | 2.44030 | up | 290.09350   | 142.25322   | 186.35555   | 67.33865    | Detected | Detected    | Detected    | Detected    |
| 3253 | A_33_P3304794 |              | Hs.130286 |                                                                                                                          | Homo sapiens cDNA FLJ39005 fis. clone NT2R2024496, [AK096324]                                                                                                                       | 2.10965 | up | 3.24788 | up | 145.62949   | 71.47785    | 99.06617    | 26.89624    | Detected | Detected    | Detected    | Detected    |
| 3254 | A_33_P3216955 | C10orf104    | Hs.426296 | chromosome 10 open reading frame 104                                                                                     | Homo sapiens chromosome 10 open reading frame 104 (C10orf104), mRNA [NM_173473]                                                                                                     | 2.10938 | up | 2.16174 | up | 383.90213   | 188.45122   | 329.72750   | 134.49852   | Detected | Detected    | Detected    | Detected    |
| 3255 | A_23_P24004   | IFIT2        | Hs.437609 | interferon-induced protein with tetratricopeptide repeats 2                                                              | Homo sapiens interferon-induced protein with tetratricopeptide repeats 2 (IFIT2), mRNA [NM_001547]                                                                                  | 2.10905 | up | 1.94500 | up | 400.81253   | 196.78328   | 391.67624   | 177.57138   | Detected | Detected    | Detected    | Detected    |
| 3256 | A_33_P3351207 | MGC21881     | Hs.721511 | hypothetical locus MGC21881                                                                                              | Homo sapiens hypothetical locus MGC21881 (MGC21881), non-coding RNA [NR_015363]                                                                                                     | 2.10872 | up | 2.07298 | up | 2234.59600  | 1097.26930  | 1592.76810  | 677.52260   | Detected | Detected    | Detected    | Detected    |
| 3257 | A_32_P219368  | WTAP         | Hs.446091 | Wilms tumor 1 associated protein                                                                                         | Homo sapiens Wilms tumor 1 associated protein (WTAP), transcript variant 3, mRNA [NM_152858]                                                                                        | 2.10823 | up | 2.26872 | up | 2944.54980  | 1446.21560  | 1680.60680  | 653.20660   | Detected | Detected    | Detected    | Detected    |
| 3258 | A_23_P64898   | KLRG1        | Hs.558446 | killer cell lectin-like receptor subfamily G, member 1                                                                   | Homo sapiens killer cell lectin-like receptor subfamily G, member 1 (KLRG1), mRNA [NM_005810]                                                                                       | 2.10754 | up | 2.65571 | up | 42.03659    | 20.65307    | 26.95997    | 8.95167     | Detected | Detected    | Detected    | Compromised |
| 3259 | A_23_P162378  | CODC41       | Hs.279209 | coiled-coil domain containing 41                                                                                         | Homo sapiens coiled-coil domain containing 41 (CODC41), transcript variant 1, mRNA [NM_016122]                                                                                      | 2.10739 | up | 2.10726 | up | 796.97390   | 391.59027   | 675.25570   | 282.56330   | Detected | Detected    | Detected    | Detected    |
| 3260 | A_23_P375354  | TECTA        | Hs.248162 | tectorin alpha                                                                                                           | Homo sapiens tectorin alpha (TECTA), mRNA [NM_005422]                                                                                                                               | 2.10736 | up | 1.91614 | up | 13.04646    | 6.41044     | 5.47233     | 2.51831     | Detected | Compromised | Compromised | Compromised |
| 3261 | A_23_P169887  | GTF3C2       | Hs.75782  | general transcription factor IIIc, polypeptide 2, beta 110kDa                                                            | Homo sapiens general transcription factor IIIc, polypeptide 2, beta 110kDa (GTF3C2), transcript variant 1, mRNA [NM_001521]                                                         | 2.10730 | up | 1.83518 | up | 4786.27200  | 2351.81710  | 4088.15280  | 1964.32560  | Detected | Detected    | Detected    | Detected    |
| 3262 | A_24_P268160  | DRAM2        | Hs.485606 | DNA-damage regulated autophagy modulator 2                                                                               | Homo sapiens DNA-damage regulated autophagy modulator 2 (DRAM2), mRNA [NM_178454]                                                                                                   | 2.10730 | up | 2.13402 | up | 3250.51460  | 1597.20060  | 2901.04610  | 1198.73240  | Detected | Detected    | Detected    | Detected    |
| 3263 | A_23_P356646  | LOC100132288 | Hs.487562 | hypothetical protein LOC100132288                                                                                        | Homo sapiens hypothetical protein LOC100132288 (LOC100132288), mRNA [NM_001033515]                                                                                                  | 2.10666 | up | 2.33791 | up | 181.26780   | 89.09624    | 142.53410   | 53.75972    | Detected | Detected    | Detected    | Detected    |
| 3264 | A_23_P323180  | HOXD3        | Hs.93574  | homeobox D3                                                                                                              | Homo sapiens homeobox D3 (HOXD3), mRNA [NM_006898]                                                                                                                                  | 2.10624 | up | 2.05313 | up | 261.70737   | 128.65921   | 254.78667   | 109.42741   | Detected | Detected    | Detected    | Detected    |
| 3265 | A_33_P3815064 | LOC283575    | Hs.651736 | hypothetical protein LOC283575                                                                                           | Homo sapiens cDNA FLJ35003 fis. clone OCBF2011960 [AK092322]                                                                                                                        | 2.10483 | up | 2.03369 | up | 62.93807    | 30.96203    | 66.20854    | 28.70741    | Detected | Detected    | Detected    | Detected    |
| 3266 | A_23_P42322   | COL11A2      | Hs.390171 | collagen, type XI, alpha 2                                                                                               | Homo sapiens collagen, type XI, alpha 2 (COL11A2), transcript variant 1, mRNA [NM_080680]                                                                                           | 2.10392 | up | 3.32671 | up | 148.73825   | 73.20255    | 117.34801   | 31.10476    | Detected | Detected    | Detected    | Detected    |
| 3267 | A_24_P368735  | ARL10        | Hs.424552 | ADP-ribosylation factor-like 10                                                                                          | Homo sapiens ADP-ribosylation factor-like 10 (ARL10), mRNA [NM_173664]                                                                                                              | 2.10362 | up | 1.29281 | up | 14.19495    | 6.98716     | 19.09092    | 13.02139    | Detected | Compromised | Detected    | Compromised |
| 3268 | A_33_P3249364 |              | Hs.401954 |                                                                                                                          | Transmembrane and TPR repeat-containing protein 1 [Source:UniProtKB/Swiss-Prot;Acc:Q8LIUR5] [ENST00000381224]                                                                       | 2.10356 | up | 3.30269 | up | 81.02348    | 39.88319    | 71.09286    | 18.98118    | Detected | Detected    | Detected    | Detected    |
| 3269 | A_24_P142151  | LRRC28       | Hs.578684 | leucine rich repeat containing 28                                                                                        | Homo sapiens leucine rich repeat containing 28 (LRRC28), mRNA [NM_144598]                                                                                                           | 2.10326 | up | 2.30267 | up | 430.52588   | 211.95271   | 512.29960   | 196.18115   | Detected | Detected    | Detected    | Detected    |
| 3270 | A_33_P3332865 | NPEPL1       | Hs.654868 | aminopeptidase-like 1                                                                                                    | Homo sapiens aminopeptidase-like 1 (NPEPL1), mRNA [NM_024663]                                                                                                                       | 2.10315 | up | 1.85615 | up | 5005.97500  | 2464.63380  | 4344.52250  | 2063.92820  | Detected | Detected    | Detected    | Detected    |
| 3271 | A_23_P253012  | GRAMD1C      | Hs.24583  | GRAM domain containing 1C                                                                                                | Homo sapiens GRAM domain containing 1C (GRAMD1C), mRNA [NM_017577]                                                                                                                  | 2.10314 | up | 2.04687 | up | 3775.88180  | 1859.01660  | 3040.44820  | 1309.82280  | Detected | Detected    | Detected    | Detected    |
| 3272 | A_24_P41975   | TDRKH        | Hs.144439 | tudor and KH domain containing                                                                                           | Homo sapiens tudor and KH domain containing (TDRKH), transcript variant 1, mRNA [NM_001083965]                                                                                      | 2.10272 | up | 1.64037 | up | 65.60009    | 32.30399    | 52.24258    | 28.08325    | Detected | Detected    | Detected    | Detected    |

|      |               |              |           |                                                                                         |                                                                                                                                      |         |    |         |    |             |             |             |            |          |             |             |             |
|------|---------------|--------------|-----------|-----------------------------------------------------------------------------------------|--------------------------------------------------------------------------------------------------------------------------------------|---------|----|---------|----|-------------|-------------|-------------|------------|----------|-------------|-------------|-------------|
| 3273 | A_33_P3359953 | LOC100131825 | Hs.701271 | hypothetical protein LOC100131825                                                       | PREDICTED: Homo sapiens hypothetical protein LOC100131825 (LOC100131825), miscRNA [XR_079485]                                        | 2.10262 | up | 1.33542 | up | 13.18120    | 6.49123     | 3.78093     | 2.49659    | Detected | Compromised | Compromised | Compromised |
| 3274 | A_23_P154806  | EPB41L1      | Hs.704100 | erythrocyte membrane protein band 4.1-like 1                                            | Homo sapiens erythrocyte membrane protein band 4.1-like 1 (EPB41L1), transcript variant 1, mRNA [NM_012156]                          | 2.10158 | up | 2.17350 | up | 8519.12200  | 4197.41940  | 6281.65530  | 2548.47460 | Detected | Detected    | Detected    | Detected    |
| 3275 | A_23_P371266  | DNM3         | Hs.654775 | dynamins 3                                                                              | Homo sapiens dynamin 3 (DNM3), transcript variant 1, mRNA [NM_015569]                                                                | 2.10152 | up | 2.47757 | up | 382.21167   | 188.32277   | 300.72693   | 107.03173  | Detected | Detected    | Detected    | Detected    |
| 3276 | A_23_P210675  | SYCP2        | Hs.202676 | synaptonemal complex protein 2                                                          | Homo sapiens synaptonemal complex protein 2 (SYCP2), mRNA [NM_014256]                                                                | 2.10096 | up | 1.75975 | up | 55.64732    | 27.42587    | 28.83688    | 14.44981   | Detected | Detected    | Detected    | Compromised |
| 3277 | A_23_P127186  | TACC2        | Hs.501252 | transforming, acidic coiled-coil containing protein 2                                   | Homo sapiens transforming, acidic coiled-coil containing protein 2 (TACC2), transcript variant 1, mRNA [NM_206862]                   | 2.10073 | up | 2.07764 | up | 1574.31880  | 775.98860   | 1291.58130  | 548.17130  | Detected | Detected    | Detected    | Detected    |
| 3278 | A_33_P3329958 | PYY          | Hs.169249 | peptide YY                                                                              | Homo sapiens peptide YY (PYY), mRNA [NM_004160]                                                                                      | 2.10051 | up | 6.28295 | up | 20.41986    | 10.06611    | 21.49755    | 3.01711    | Detected | Compromised | Detected    | Compromised |
| 3279 | A_23_P103932  | FGR          | Hs.1422   | Gardner-Rasheed feline sarcoma viral (v-fgr) oncogene homolog                           | Homo sapiens Gardner-Rasheed feline sarcoma viral (v-fgr) oncogene homolog (FGR), transcript variant 2, mRNA [NM_001042747]          | 2.10045 | up | 2.79721 | up | 165.66338   | 81.66721    | 106.41331   | 33.54570   | Detected | Detected    | Detected    | Detected    |
| 3280 | A_33_P3257861 | SARDH        | Hs.198003 | sarcosine dehydrogenase                                                                 | Homo sapiens sarcosine dehydrogenase (SARDH), nuclear gene encoding mitochondrial protein, transcript variant 2, mRNA [NM_001134707] | 2.10007 | up | 1.40920 | up | 79.09638    | 38.99924    | 82.24799    | 51.46558   | Detected | Detected    | Detected    | Detected    |
| 3281 | A_24_P873764  | BCR          | Hs.517461 | breakpoint cluster region                                                               | Homo sapiens breakpoint cluster region (BCR), transcript variant 1, mRNA [NM_004327]                                                 | 2.09980 | up | 1.86604 | up | 3972.70750  | 1959.03750  | 3344.45140  | 1580.40500 | Detected | Detected    | Detected    | Detected    |
| 3282 | A_33_P3390236 | LOC338963    | Hs.254464 | hypothetical protein LOC338963                                                          | PREDICTED: Homo sapiens hypothetical protein LOC338963 (LOC338963), miscRNA [XR_040082]                                              | 2.09977 | up | 3.47263 | up | 127.66668   | 62.95638    | 89.69248    | 22.77526   | Detected | Detected    | Detected    | Detected    |
| 3283 | A_23_P391396  | EBF3         | Hs.591374 | early B-cell factor 3                                                                   | Homo sapiens early B-cell factor 3 (EBF3), mRNA [NM_001005463]                                                                       | 2.09936 | up | 2.16334 | up | 1128.68080  | 556.69556   | 885.29020   | 360.84976  | Detected | Detected    | Detected    | Detected    |
| 3284 | A_33_P3237580 |              | Hs.434138 |                                                                                         | HGQ2045601 cDNA FLJ45513 fis. clone BRTH42021450 ; [Source:UniProtKB/TrEMBL;Acc:Q6ZSH9] [ENST00000376609]                            | 2.09910 | up | 1.11032 | up | 12.77991    | 6.30416     | 3.14430     | 2.49713    | Detected | Compromised | Compromised | Compromised |
| 3285 | A_32_P192594  | LOC400099    | Hs.400432 | hypothetical LOC400099                                                                  | PREDICTED: Homo sapiens hypothetical LOC400099 (LOC400099), miscRNA [XR_040794]                                                      | 2.09814 | up | 2.19304 | up | 10585.88300 | 5224.27150  | 8349.17100  | 3357.08570 | Detected | Detected    | Detected    | Detected    |
| 3286 | A_23_P200030  | FPGT         | Hs.480085 | fucose-1-phosphate guanylyltransferase                                                  | Homo sapiens fucose-1-phosphate guanylyltransferase (FPGT), mRNA [NM_003838]                                                         | 2.09770 | up | 1.90620 | up | 257.78476   | 127.24680   | 209.97437   | 97.13223   | Detected | Detected    | Detected    | Detected    |
| 3287 | A_33_P3330826 | LOC100132077 | Hs.679111 | hypothetical protein LOC100132077                                                       | Homo sapiens cDNA FLJ37869 fis. clone BRSSN2017422 [AK095188]                                                                        | 2.09718 | up | 2.30196 | up | 26.70653    | 13.18604    | 25.66311    | 9.83053    | Detected | Compromised | Detected    | Compromised |
| 3288 | A_23_P138541  | AKR1C3       | Hs.78183  | aldo-keto reductase family 1, member C3 (3-alpha hydroxysteroid dehydrogenase, type II) | Homo sapiens aldo-keto reductase family 1, member C3 (3-alpha hydroxysteroid dehydrogenase, type II) (AKR1C3), mRNA [NM_003739]      | 2.09711 | up | 3.50708 | up | 27028.15800 | 13345.30200 | 16328.14550 | 4105.40620 | Detected | Detected    | Detected    | Detected    |
| 3289 | A_32_P231493  | LOC100129122 | Hs.344872 | hypothetical LOC100129122                                                               | PREDICTED: Homo sapiens hypothetical LOC100129122 (LOC100129122), mRNA [XM_001714405]                                                | 2.09697 | up | 1.90089 | up | 1242.42090  | 613.49350   | 1177.88610  | 546.40190  | Detected | Detected    | Detected    | Detected    |
| 3290 | A_23_P141092  | TFAP4        | Hs.513305 | transcription factor AP-4 (activating enhancer binding protein 4)                       | Homo sapiens transcription factor AP-4 (activating enhancer binding protein 4) (TFAP4), mRNA [NM_003223]                             | 2.09673 | up | 1.06114 | up | 20.41479    | 10.08173    | 12.45214    | 10.34755   | Detected | Compromised | Compromised | Compromised |
| 3291 | A_24_P933418  | ABI2         | Hs.471156 | abi-1-interactor 2                                                                      | Homo sapiens abi-1-interactor 2 (ABI2), mRNA [NM_005759]                                                                             | 2.09610 | up | 2.01290 | up | 558.16284   | 275.72900   | 280.35745   | 122.81622  | Detected | Detected    | Detected    | Detected    |
| 3292 | A_33_P3221868 | TMEM216      | Hs.26745  | transmembrane protein 216                                                               | Homo sapiens transmembrane protein 216 (TMEM216), mRNA [NM_016499]                                                                   | 2.09512 | up | 2.07842 | up | 999.85180   | 494.15182   | 1091.54170  | 463.09872  | Detected | Detected    | Detected    | Detected    |
| 3293 | A_23_P20022   | C7orf68      | Hs.710088 | chromosome 7 open reading frame 68                                                      | Homo sapiens chromosome 7 open reading frame 68 (C7orf68), transcript variant 1, mRNA [NM_013332]                                    | 2.09464 | up | 2.11409 | up | 7732.06150  | 3822.25300  | 7576.07370  | 3159.98900 | Detected | Detected    | Detected    | Detected    |
| 3294 | A_23_P502170  | DYNC2L1      | Hs.371597 | dynein, cytoplasmic 2, light intermediate chain 1                                       | Homo sapiens dynein, cytoplasmic 2, light intermediate chain 1 (DYNC2L1), transcript variant 2, mRNA [NM_015522]                     | 2.09451 | up | 2.13944 | up | 501.68180   | 248.01535   | 386.75058   | 159.40321  | Detected | Detected    | Detected    | Detected    |
| 3295 | A_33_P3360728 | BLVRB        | Hs.515785 | biliverdin reductase B (flavin reductase (NADPH))                                       | Homo sapiens biliverdin reductase B (flavin reductase (NADPH)) (BLVRB), mRNA [NM_000713]                                             | 2.09308 | up | 2.23772 | up | 14791.13000 | 7317.26860  | 14110.56100 | 5560.36470 | Detected | Detected    | Detected    | Detected    |
| 3296 | A_23_P167358  | C4orf29      | Hs.445817 | chromosome 4 open reading frame 29                                                      | Homo sapiens chromosome 4 open reading frame 29 (C4orf29), mRNA [NM_001039717]                                                       | 2.09108 | up | 1.81555 | up | 152.10526   | 75.31940    | 144.33481   | 70.10152   | Detected | Detected    | Detected    | Detected    |
| 3297 | A_33_P3238250 | F11R         | Hs.517293 | F11 receptor                                                                            | Homo sapiens F11 receptor (F11R), mRNA [NM_016946]                                                                                   | 2.08992 | up | 1.44797 | up | 26.57630    | 13.16831    | 16.69701    | 10.16820   | Detected | Compromised | Detected    | Compromised |
| 3298 | A_33_P3287058 |              | Hs.554395 |                                                                                         | Homo sapiens cDNA FLJ30719 fis. clone FCBBF2001718. [AK055281]                                                                       | 2.08965 | up | 2.08342 | up | 24.77448    | 12.27622    | 8.27130     | 3.48404    | Detected | Compromised | Compromised | Compromised |
| 3299 | A_33_P3298634 | NFS1         | Hs.194692 | NFS1 nitrogen fixation 1 homolog (S. cerevisiae)                                        | Homo sapiens NFS1 nitrogen fixation 1 homolog (S. cerevisiae) (NFS1), nuclear gene encoding mitochondrial protein, mRNA [NM_021100]  | 2.08873 | up | 1.71908 | up | 107.45822   | 53.27097    | 100.38499   | 51.49176   | Detected | Detected    | Detected    | Detected    |
| 3300 | A_33_P3616021 | LOC100292961 | Hs.397403 | hypothetical protein LOC100292961                                                       | PREDICTED: Homo sapiens hypothetical protein LOC100292961 (LOC100292961), mRNA [XM_002345453]                                        | 2.08817 | up | 7.82464 | up | 51.55629    | 25.56512    | 25.89193    | 2.91787    | Detected | Detected    | Detected    | Compromised |
| 3301 | A_24_P228130  | CCL3L3       | Hs.512304 | chemokine (C-C motif) ligand 3-like 3                                                   | Homo sapiens chemokine (C-C motif) ligand 3-like 3 (CCL3L3), mRNA [NM_001001437]                                                     | 2.08813 | up | 4.03364 | up | 18.60374    | 9.22518     | 26.48538    | 5.78994    | Detected | Compromised | Detected    | Compromised |

|      |               |              |           |                                                                           |                                                                                                                          |         |    |         |    |             |            |            |            |          |             |             |             |
|------|---------------|--------------|-----------|---------------------------------------------------------------------------|--------------------------------------------------------------------------------------------------------------------------|---------|----|---------|----|-------------|------------|------------|------------|----------|-------------|-------------|-------------|
| 3302 | A_33_P3403927 | SAMD10       | Hs.27189  | sterile alpha motif domain containing 10                                  | Homo sapiens sterile alpha motif domain containing 10 (SAMD10), mRNA [NM_080621]                                         | 2.08703 | up | 2.16252 | up | 382.39868   | 189.72308  | 345.49110  | 140.87752  | Detected | Detected    | Detected    | Detected    |
| 3303 | A_23_P350754  | OR7E13P      | Hs.684491 | olfactory receptor, family 7, subfamily E, member 13 pseudogene           | Homo sapiens olfactory-like receptor PJCQ2 (PJCQ2) mRNA, partial cds [AF238487]                                          | 2.08546 | up | 2.71764 | up | 321.41913   | 159.58899  | 223.20198  | 72.42220   | Detected | Detected    | Detected    | Detected    |
| 3304 | A_33_P3230588 |              |           |                                                                           |                                                                                                                          | 2.08482 | up | 1.31709 | up | 15.43248    | 7.66479    | 11.22353   | 7.51414    | Detected | Compromised | Compromised | Compromised |
| 3305 | A_23_P364766  | C20orf94     | Hs.668782 | chromosome 20 open reading frame 94                                       | Homo sapiens chromosome 20 open reading frame 94 (C20orf94), mRNA [NM_001009608]                                         | 2.08454 | up | 1.83128 | up | 211.12790   | 104.87419  | 119.44868  | 57.51648   | Detected | Detected    | Detected    | Detected    |
| 3306 | A_23_P37375   | RPS6KA5      | Hs.510225 | ribosomal protein S6 kinase, 90kDa, polypeptide 5                         | Homo sapiens ribosomal protein S6 kinase, 90kDa, polypeptide 5 (RPS6KA5), transcript variant 1, mRNA [NM_004755]         | 2.08441 | up | 2.08993 | up | 1246.95360  | 619.44226  | 869.69293  | 366.94443  | Detected | Detected    | Detected    | Detected    |
| 3307 | A_33_P3254291 | CNOT4        | Hs.490224 | CCR4-NOT transcription complex, subunit 4                                 | Homo sapiens CCR4-NOT transcription complex, subunit 4 (CNOT4), transcript variant 2, mRNA [NM_001008225]                | 2.08397 | up | 2.24363 | up | 73.78865    | 36.66340   | 47.89127   | 18.82221   | Detected | Detected    | Detected    | Detected    |
| 3308 | A_33_P3396807 | ATG4C        | Hs.7353   | ATG4 autophagy related 4 homolog C (S. cerevisiae)                        | Homo sapiens ATG4 autophagy related 4 homolog C (S. cerevisiae) (ATG4C), transcript variant 7, mRNA [NM_032852]          | 2.08336 | up | 1.97232 | up | 438.02023   | 217.70232  | 410.59763  | 183.57138  | Detected | Detected    | Detected    | Detected    |
| 3309 | A_23_P381102  | CCDC74B      | Hs.29383  | coiled-coil domain containing 74B                                         | Homo sapiens coiled-coil domain containing 74B (CCDC74B), mRNA [NM_207310]                                               | 2.08225 | up | 2.03211 | up | 3369.48930  | 1675.57400 | 2140.37550 | 928.76940  | Detected | Detected    | Detected    | Detected    |
| 3310 | A_23_P163161  | SDR39U1      | Hs.643552 | short chain dehydrogenase/reductase family 39U, member 1                  | Homo sapiens short chain dehydrogenase/reductase family 39U, member 1 (SDR39U1), mRNA [NM_020195]                        | 2.08151 | up | 1.88883 | up | 2174.32420  | 1081.63180 | 2497.01170 | 1165.71640 | Detected | Detected    | Detected    | Detected    |
| 3311 | A_23_P7253    | LARP1B       | Hs.657067 | La ribonucleoprotein domain family, member 1B                             | Homo sapiens La ribonucleoprotein domain family, member 1B (LARP1B), transcript variant 1, mRNA [NM_018078]              | 2.08144 | up | 2.21035 | up | 274.13260   | 136.37361  | 212.97728  | 84.96464   | Detected | Detected    | Detected    | Detected    |
| 3312 | A_33_P3289406 | LOC91450     | Hs.406766 | hypothetical protein LOC91450                                             | Homo sapiens hypothetical protein LOC91450 (LOC91450), non-coding RNA [NR_026998]                                        | 2.08142 | up | 2.19734 | up | 378.09448   | 188.09303  | 264.57608  | 106.17438  | Detected | Detected    | Detected    | Detected    |
| 3313 | A_33_P3381943 | DMTF1        | Hs.196129 | cyclin D binding myb-like transcription factor 1                          | Homo sapiens cyclin D binding myb-like transcription factor 1 (DMTF1), transcript variant 4, transcribed RNA [NR_024549] | 2.08070 | up | 1.94929 | up | 107.38522   | 53.44023   | 103.71880  | 46.91865   | Detected | Detected    | Detected    | Detected    |
| 3314 | A_32_P131367  | RNF13        | Hs.12333  | ring finger protein 13                                                    | Homo sapiens ring finger protein 13 (RNF13), transcript variant 1, mRNA [NM_007282]                                      | 2.08065 | up | 2.32722 | up | 1172.52820  | 583.52210  | 827.56290  | 313.56644  | Detected | Detected    | Detected    | Detected    |
| 3315 | A_24_P174755  | SLC22A5      | Hs.443572 | solute carrier family 22 (organic cation/carnitine transporter), member 5 | Homo sapiens solute carrier family 22 (organic cation/carnitine transporter), member 5 (SLC22A5), mRNA [NM_003060]       | 2.08042 | up | 2.20833 | up | 440.23040   | 219.11003  | 343.73315  | 137.25330  | Detected | Detected    | Detected    | Detected    |
| 3316 | A_24_P314179  | ETS2         | Hs.644231 | v-ets erythroblastosis virus E26 oncogene homolog 2 (avian)               | Homo sapiens v-ets erythroblastosis virus E26 oncogene homolog 2 (avian) (ETS2), mRNA [NM_005235]                        | 2.07965 | up | 1.98134 | up | 3419.79830  | 1702.72220 | 2546.61380 | 1133.36330 | Detected | Detected    | Detected    | Detected    |
| 3317 | A_23_P105833  | BIVM         | Hs.288809 | basic, immunoglobulin-like variable motif containing                      | Homo sapiens basic, immunoglobulin-like variable motif containing (BIVM), transcript variant 1, mRNA [NM_017693]         | 2.07842 | up | 2.09045 | up | 1253.26040  | 624.37010  | 914.37384  | 385.69950  | Detected | Detected    | Detected    | Detected    |
| 3318 | A_32_P201979  | HECTD2       | Hs.596096 | HECT domain containing 2                                                  | Homo sapiens HECT domain containing 2 (HECTD2), transcript variant 1, mRNA [NM_182765]                                   | 2.07773 | up | 2.16196 | up | 674.49774   | 336.14290  | 453.95470  | 185.15290  | Detected | Detected    | Detected    | Detected    |
| 3319 | A_33_P3404671 | LOC100130557 |           | hypothetical LOC100130557                                                 | Homo sapiens hypothetical LOC100130557 (LOC100130557), non-coding RNA [NR_024567]                                        | 2.07767 | up | 2.18242 | up | 207.74046   | 103.53269  | 183.79085  | 74.25951   | Detected | Detected    | Detected    | Detected    |
| 3320 | A_23_P209499  | PAX3         | Hs.42146  | paired box 3                                                              | Homo sapiens paired box 3 (PAX3), transcript variant PAX3D, mRNA [NM_181458]                                             | 2.07682 | up | 2.20007 | up | 1332.77940  | 664.49690  | 794.92505  | 318.60712  | Detected | Detected    | Detected    | Detected    |
| 3321 | A_33_P3249529 | PCNX         | Hs.446559 | pecanex homolog (Drosophila)                                              | Homo sapiens pecanex homolog (Drosophila) (PCNX), mRNA [NM_014982]                                                       | 2.07660 | up | 5.47695 | up | 17399.60700 | 8676.00500 | 4817.22600 | 775.57477  | Detected | Detected    | Detected    | Detected    |
| 3322 | A_33_P3308740 | RANBP2       | Hs.199561 | RAN binding protein 2                                                     | Homo sapiens RAN binding protein 2 (RANBP2), mRNA [NM_006267]                                                            | 2.07643 | up | 2.45826 | up | 12.46262    | 6.21478    | 7.49281    | 2.68771    | Detected | Compromised | Compromised | Compromised |
| 3323 | A_23_P77661   | ZNF720       | Hs.528826 | zinc finger protein 720                                                   | Homo sapiens zinc finger protein 720 (ZNF720), mRNA [NM_001130913]                                                       | 2.07568 | up | 2.36914 | up | 688.19830   | 343.30988  | 485.96234  | 180.87448  | Detected | Detected    | Detected    | Detected    |
| 3324 | A_33_P3411145 | LOC285550    | Hs.399980 | hypothetical protein LOC285550                                            | Homo sapiens hypothetical protein LOC285550 (LOC285550), mRNA [NM_001145191]                                             | 2.07494 | up | 1.86970 | up | 260.54843   | 130.02193  | 213.31825  | 100.60561  | Detected | Detected    | Detected    | Detected    |
| 3325 | A_33_P3407049 |              |           |                                                                           |                                                                                                                          | 2.07438 | up | 2.06035 | up | 184.34400   | 92.01622   | 135.83720  | 58.13566   | Detected | Detected    | Detected    | Detected    |
| 3326 | A_33_P3233005 | MBTD1        | Hs.656803 | mbt domain containing 1                                                   | Homo sapiens mbt domain containing 1 (MBTD1), mRNA [NM_017643]                                                           | 2.07425 | up | 1.98260 | up | 55.26387    | 27.58754   | 40.83978   | 18.16411   | Detected | Detected    | Detected    | Detected    |
| 3327 | A_33_P3323544 | LOC100130764 |           | p150-like                                                                 | PREDICTED: Homo sapiens p150-like (LOC100130764), mRNA [XM_001723337]                                                    | 2.07413 | up | 2.21412 | up | 37.95797    | 18.94957   | 6.77445    | 2.69797    | Detected | Detected    | Compromised | Compromised |
| 3328 | A_23_P332399  | GULP1        | Hs.470887 | GULP, engulfment adaptor PTB domain containing 1                          | Homo sapiens GULP, engulfment adaptor PTB domain containing 1 (GULP1), mRNA [NM_016315]                                  | 2.07363 | up | 2.17942 | up | 2335.25660  | 1166.09950 | 1951.23900 | 789.46950  | Detected | Detected    | Detected    | Detected    |
| 3329 | A_33_P3407042 | B3GALT6      | Hs.284284 | UDP-GalbetaGal beta 1,3-galactosyltransferase polypeptide 6               | Homo sapiens UDP-GalbetaGal beta 1,3-galactosyltransferase polypeptide 6 (B3GALT6), mRNA [NM_080605]                     | 2.07335 | up | 2.14618 | up | 7329.06100  | 3660.23340 | 7649.73800 | 3143.00420 | Detected | Detected    | Detected    | Detected    |
| 3330 | A_24_P194886  | EHBP1        | Hs.271667 | EH domain binding protein 1                                               | Homo sapiens EH domain binding protein 1 (EHBP1), transcript variant 1, mRNA [NM_015282]                                 | 2.07327 | up | 1.41153 | up | 385.78693   | 192.67505  | 275.67578  | 172.21582  | Detected | Detected    | Detected    | Detected    |
| 3331 | A_32_P177955  | LOC441461    | Hs.163155 | hypothetical LOC441461                                                    | PREDICTED: Homo sapiens hypothetical LOC441461 (LOC441461), miscRNA [XR_041357]                                          | 2.07273 | up | 1.80994 | up | 78.00308    | 38.96744   | 51.08580   | 24.88862   | Detected | Detected    | Detected    | Detected    |



|      |               |              |           |                                                              |                                                                                                                                                                         |         |    |         |    |             |             |             |             |             |             |             |             |
|------|---------------|--------------|-----------|--------------------------------------------------------------|-------------------------------------------------------------------------------------------------------------------------------------------------------------------------|---------|----|---------|----|-------------|-------------|-------------|-------------|-------------|-------------|-------------|-------------|
| 3332 | A_24_P72518   | AHCYL2       | Hs.600789 | adenosylhomocysteinase-like 2                                | Homo sapiens adenosylhomocysteinase-like 2 (AHCYL2), transcript variant 1, mRNA [NM_015328]                                                                             | 2.07255 | up | 2.26396 | up | 1300.92980  | 649.95260   | 757.03520   | 294.85858   | Detected    | Detected    | Detected    | Detected    |
| 3333 | A_24_P234856  | CAMLG        | Hs.529846 | calcium modulating ligand                                    | Homo sapiens calcium modulating ligand (CAMLG), mRNA [NM_001745]                                                                                                        | 2.07224 | up | 2.23000 | up | 508.52646   | 254.10118   | 264.69626   | 104.66673   | Detected    | Detected    | Detected    | Detected    |
| 3334 | A_33_P3620246 |              | Hs.635230 |                                                              | Putative uncharacterized protein ENSP00000344626 Fragment [Source:UniProtKB/TREMBL/ACC:AGNL00] [ENST00000395215]                                                        | 2.07216 | up | 2.97065 | up | 87.09316    | 43.52060    | 38.84401    | 11.53025    | Detected    | Detected    | Detected    | Compromised |
| 3335 | A_23_P201979  | CREM         | Hs.200250 | cAMP responsive element modulator                            | Homo sapiens cAMP responsive element modulator (CREM), transcript variant 19, mRNA [NM_183013]                                                                          | 2.07206 | up | 2.18405 | up | 1330.59720  | 664.93280   | 1169.48070  | 472.16810   | Detected    | Detected    | Detected    | Detected    |
| 3336 | A_24_P712350  | CHML         | Hs.654545 | choroideremia-like (Rab escort protein 2)                    | Homo sapiens choroideremia-like (Rab escort protein 2) (CHML), mRNA [NM_001821]                                                                                         | 2.07131 | up | 2.03736 | up | 4630.38100  | 2314.75590  | 3044.36400  | 1317.63160  | Detected    | Detected    | Detected    | Detected    |
| 3337 | A_23_P65262   | N4BP2L2      | Hs.507680 | NEDD4 binding protein 2-like 2                               | Homo sapiens NEDD4 binding protein 2-like 2 (N4BP2L2), transcript variant 1, mRNA [NM_033111]                                                                           | 2.07109 | up | 2.10385 | up | 1810.32970  | 905.08950   | 1708.08480  | 715.91310   | Detected    | Detected    | Detected    | Detected    |
| 3338 | A_33_P3263906 |              |           |                                                              | Tubulin epsilon chain (Epsilon-tubulin) [Source:UniProtKB/Swiss-Prot/ACC:Q9UJT0] [ENST00000388657]                                                                      | 2.07086 | up | 2.52171 | up | 10.98013    | 5.49022     | 14.61387    | 5.11018     | Compromised | Compromised | Detected    | Compromised |
| 3339 | A_33_P3387956 | DPP7         | Hs.37916  | dipeptidyl-peptidase 7                                       | Homo sapiens dipeptidyl-peptidase 7 (DPP7), mRNA [NM_013379]                                                                                                            | 2.07084 | up | 1.81407 | up | 8042.44900  | 4021.38670  | 8227.69300  | 3999.35700  | Detected    | Detected    | Detected    | Detected    |
| 3340 | A_24_P274270  | STAT1        | Hs.642990 | signal transducer and activator of transcription 1, 91kDa    | Homo sapiens signal transducer and activator of transcription 1, 91kDa (STAT1), transcript variant beta, mRNA [NM_139266]                                               | 2.07037 | up | 1.96045 | up | 3114.68140  | 1557.75050  | 2593.71140  | 1166.62460  | Detected    | Detected    | Detected    | Detected    |
| 3341 | A_24_P69691   | ZNF25        | Hs.499429 | zinc finger protein 25                                       | Homo sapiens zinc finger protein 25 (ZNF25), mRNA [NM_145011]                                                                                                           | 2.07015 | up | 2.10597 | up | 842.58780   | 421.45044   | 585.78990   | 245.27588   | Detected    | Detected    | Detected    | Detected    |
| 3342 | A_33_P3333232 |              |           |                                                              | Coiled-coil domain-containing protein C6orf185 [Source:UniProtKB/Swiss-Prot/ACC:A2VCL2] [ENST00000440451]                                                               | 2.06974 | up | 2.26664 | up | 41.58016    | 20.80196    | 27.30990    | 10.62436    | Detected    | Detected    | Detected    | Compromised |
| 3343 | A_23_P65068   | EID3         | Hs.659857 | EP300 interacting inhibitor of differentiation 3             | Homo sapiens EP300 interacting inhibitor of differentiation 3 (EID3), mRNA [NM_001008394]                                                                               | 2.06926 | up | 2.11861 | up | 477.25540   | 238.81890   | 523.64280   | 217.94588   | Detected    | Detected    | Detected    | Detected    |
| 3344 | A_33_P3302305 | BCKDHA       | Hs.433307 | branched chain keto acid dehydrogenase E1, alpha polypeptide | Homo sapiens branched chain keto acid dehydrogenase E1, alpha polypeptide (BCKDHA), nuclear gene encoding mitochondrial protein, transcript variant 1, mRNA [NM_000709] | 2.06914 | up | 1.87581 | up | 3412.43430  | 1707.68640  | 4353.97270  | 2046.73860  | Detected    | Detected    | Detected    | Detected    |
| 3345 | A_24_P72064   | GHR          | Hs.125180 | growth hormone receptor                                      | Homo sapiens growth hormone receptor (GHR), mRNA [NM_000163]                                                                                                            | 2.06870 | up | 2.10705 | up | 874.85060   | 437.79532   | 667.48440   | 279.33908   | Detected    | Detected    | Detected    | Detected    |
| 3346 | A_32_P181527  | C8orf85      | Hs.437551 | chromosome 8 open reading frame 85                           | Homo sapiens chromosome 8 open reading frame 85 (C8orf85), mRNA [NM_001025357]                                                                                          | 2.06779 | up | 1.47872 | up | 131.02931   | 65.61386    | 109.05170   | 65.02959    | Detected    | Detected    | Detected    | Detected    |
| 3347 | A_23_P341503  | C3orf35      | Hs.475945 | chromosome 3 open reading frame 35                           | Homo sapiens chromosome 3 open reading frame 35 (C3orf35), transcript variant B, mRNA [NM_178339]                                                                       | 2.06763 | up | 2.14092 | up | 161.50237   | 80.87975    | 84.12185    | 34.64769    | Detected    | Detected    | Detected    | Detected    |
| 3348 | A_33_P3423600 | C17orf90     | Hs.655241 | chromosome 17 open reading frame 90                          | Homo sapiens chromosome 17 open reading frame 90 (C17orf90), mRNA [NM_001039842]                                                                                        | 2.06747 | up | 1.91755 | up | 26356.01200 | 13199.96700 | 22424.10200 | 10311.79200 | Detected    | Detected    | Detected    | Detected    |
| 3349 | A_33_P3409159 | SLC22A23     | Hs.713588 | solute carrier family 22, member 23                          | Homo sapiens solute carrier family 22, member 23 (SLC22A23), transcript variant 1, mRNA [NM_015482]                                                                     | 2.06721 | up | 2.21371 | up | 1429.05850  | 715.81090   | 642.83990   | 256.06380   | Detected    | Detected    | Detected    | Detected    |
| 3350 | A_23_P503182  | ABR          | Hs.159306 | active BCR-related gene                                      | Homo sapiens active BCR-related gene (ABR), transcript variant 1, mRNA [NM_021962]                                                                                      | 2.06703 | up | 1.96486 | up | 22101.09800 | 11071.35800 | 23198.76600 | 10411.14700 | Detected    | Detected    | Detected    | Detected    |
| 3351 | A_33_P3467872 | LOC144920    | Hs.567700 | hypothetical protein LOC144920                               | Homo sapiens cDNA FLJ25324 fis. clone TS700330 [AK038053]                                                                                                               | 2.06657 | up | 2.61762 | up | 44.38470    | 22.23910    | 18.16539    | 6.11934     | Detected    | Detected    | Detected    | Compromised |
| 3352 | A_33_P3239569 |              | Hs.190968 |                                                              | 40S ribosomal protein S21 [Source:UniProtKB/Swiss-Prot/ACC:P63220] [ENST00000370562]                                                                                    | 2.06597 | up | 2.07089 | up | 527.03040   | 264.14688   | 525.70920   | 223.84857   | Detected    | Detected    | Detected    | Detected    |
| 3353 | A_23_P257043  | GEM          | Hs.654463 | GTP binding protein overexpressed in skeletal muscle         | Homo sapiens GTP binding protein overexpressed in skeletal muscle (GEM), transcript variant 1, mRNA [NM_005261]                                                         | 2.06502 | up | 2.19543 | up | 1322.45800  | 663.11690   | 1283.06910  | 515.34260   | Detected    | Detected    | Detected    | Detected    |
| 3354 | A_24_P238040  | USP6         | Hs.448851 | ubiquitin specific peptidase 6 (Tre-2 oncogene)              | Homo sapiens ubiquitin specific peptidase 6 (Tre-2 oncogene) (USP6), mRNA [NM_004505]                                                                                   | 2.06476 | up | 1.29339 | up | 14.73115    | 7.38755     | 6.05095     | 4.12533     | Detected    | Compromised | Compromised | Compromised |
| 3355 | A_23_P147450  | SPG21        | Hs.242458 | spastic paraplegia 21 (autosomal recessive, Mast syndrome)   | Homo sapiens spastic paraplegia 21 (autosomal recessive, Mast syndrome) (SPG21), transcript variant 1, mRNA [NM_016630]                                                 | 2.06470 | up | 2.11295 | up | 24415.37700 | 12244.45200 | 22739.69300 | 9489.88800  | Detected    | Detected    | Detected    | Detected    |
| 3356 | A_33_P3331911 | LOC100129767 | Hs.639607 | similar to rCG40189                                          | PREDICTED: Homo sapiens similar to rCG40189 (LOC100129767), miscRNA [XR_039365]                                                                                         | 2.06464 | up | 3.06139 | up | 18.31636    | 9.18605     | 10.60686    | 3.05515     | Detected    | Compromised | Compromised | Compromised |
| 3357 | A_23_P76102   | GDF11        | Hs.600883 | growth differentiation factor 11                             | Homo sapiens growth differentiation factor 11 (GDF11), mRNA [NM_005811]                                                                                                 | 2.06442 | up | 1.91391 | up | 1293.39690  | 648.73520   | 1285.12160  | 592.09090   | Detected    | Detected    | Detected    | Detected    |
| 3358 | A_23_P2283    | TAC3         | Hs.9730   | tachykinin 3                                                 | Homo sapiens tachykinin 3 (TAC3), mRNA [NM_013251]                                                                                                                      | 2.06439 | up | 1.56104 | up | 17.97314    | 9.01501     | 20.42554    | 11.53785    | Detected    | Compromised | Detected    | Compromised |
| 3359 | A_23_P68072   | WDR54        | Hs.643480 | WD repeat domain 54                                          | Homo sapiens WD repeat domain 54 (WDR54), mRNA [NM_032118]                                                                                                              | 2.06381 | up | 2.02287 | up | 5700.47600  | 2860.05620  | 6317.20460  | 2753.73970  | Detected    | Detected    | Detected    | Detected    |
| 3360 | A_23_P156289  | OSMR         | Hs.120658 | oncostatin M receptor                                        | Homo sapiens oncostatin M receptor (OSMR), mRNA [NM_003999]                                                                                                             | 2.06371 | up | 1.83192 | up | 627.20130   | 314.69647   | 622.91900   | 299.84006   | Detected    | Detected    | Detected    | Detected    |
| 3361 | A_24_P268893  | THAP6        | Hs.479971 | THAP domain containing 6                                     | Homo sapiens THAP domain containing 6 (THAP6), mRNA [NM_144721]                                                                                                         | 2.06291 | up | 1.90673 | up | 686.15100   | 344.40820   | 573.78060   | 265.35130   | Detected    | Detected    | Detected    | Detected    |

|      |               |              |           |                                                                                |                                                                                                                                                                              |         |    |         |    |              |             |              |             |             |             |             |             |
|------|---------------|--------------|-----------|--------------------------------------------------------------------------------|------------------------------------------------------------------------------------------------------------------------------------------------------------------------------|---------|----|---------|----|--------------|-------------|--------------|-------------|-------------|-------------|-------------|-------------|
| 3362 | A_33_P3606465 | LOC645158    | Hs.712861 | hypothetical protein LOC645158                                                 | PREDICTED: Homo sapiens hypothetical protein LOC645158 (LOC645158), miscRNA [XR_078662]                                                                                      | 2.06269 | up | 2.42108 | up | 347.92157    | 174.65518   | 247.02962    | 89.97143    | Detected    | Detected    | Detected    | Detected    |
| 3363 | A_23_P434289  | GPR62        | Hs.232213 | G protein-coupled receptor 62                                                  | Homo sapiens G protein-coupled receptor 62 (GPR62), mRNA [NM_080865]                                                                                                         | 2.06238 | up | 2.25960 | up | 133.15550    | 66.85347    | 105.19013    | 41.04968    | Detected    | Detected    | Detected    | Detected    |
| 3364 | A_32_P10396   | WDFY3        | Hs.480116 | WD repeat and FYVE domain containing 3                                         | Homo sapiens WD repeat and FYVE domain containing 3 (WDFY3), transcript variant 1, mRNA [NM_014991]                                                                          | 2.06179 | up | 1.85214 | up | 749.05920    | 376.18732   | 524.47840    | 249.70060   | Detected    | Detected    | Detected    | Detected    |
| 3365 | A_23_P410312  | C12orf76     | Hs.44817  | chromosome 12 open reading frame 76                                            | Homo sapiens chromosome 12 open reading frame 76 (C12orf76), mRNA [NM_207435]                                                                                                | 2.06156 | up | 2.24803 | up | 1268.19790   | 636.97675   | 1147.52090   | 450.11650   | Detected    | Detected    | Detected    | Detected    |
| 3366 | A_23_P433229  | PHYHIP       | Hs.334688 | phytanoyl-CoA 2-hydroxylase interacting protein                                | Homo sapiens phytanoyl-CoA 2-hydroxylase interacting protein (PHYHIP), transcript variant 2, mRNA [NM_014759]                                                                | 2.06097 | up | 1.83133 | up | 56.49025     | 28.38153    | 57.59419     | 27.73176    | Detected    | Detected    | Detected    | Detected    |
| 3367 | A_33_P3270776 | HTRA3        | Hs.479119 | HtrA serine peptidase 3                                                        | Homo sapiens HtrA serine peptidase 3 (HTRA3), mRNA [NM_053044]                                                                                                               | 2.06066 | up | 1.56209 | up | 237.17336    | 119.17733   | 199.94624    | 112.86816   | Detected    | Detected    | Detected    | Detected    |
| 3368 | A_33_P3252369 | TMEM182      | Hs.436203 | transmembrane protein 182                                                      | Homo sapiens transmembrane protein 182 (TMEM182), mRNA [NM_144522]                                                                                                           | 2.06048 | up | 2.49352 | up | 155.72316    | 78.25609    | 129.45029    | 45.77780    | Detected    | Detected    | Detected    | Detected    |
| 3369 | A_33_P3235204 | C9orf169     | Hs.512469 | chromosome 9 open reading frame 169                                            | Homo sapiens chromosome 9 open reading frame 169 (C9orf169), mRNA [NM_199001]                                                                                                | 2.06007 | up | 2.10473 | up | 743.68480    | 373.79996   | 670.78723    | 281.03043   | Detected    | Detected    | Detected    | Detected    |
| 3370 | A_23_P216038  | PHF20L1      | Hs.304362 | PHD finger protein 20-like 1                                                   | Homo sapiens PHD finger protein 20-like 1 (PHF20L1), transcript variant 2, mRNA [NM_032205]                                                                                  | 2.05912 | up | 2.01204 | up | 1933.83080   | 972.45685   | 1500.84020   | 657.75230   | Detected    | Detected    | Detected    | Detected    |
| 3371 | A_33_P3336198 | C16orf79     | Hs.647399 | chromosome 16 open reading frame 79                                            | Homo sapiens chromosome 16 open reading frame 79 (C16orf79), mRNA [NM_182563]                                                                                                | 2.05877 | up | 1.84967 | up | 236.97636    | 119.18749   | 249.79265    | 119.08342   | Detected    | Detected    | Detected    | Detected    |
| 3372 | A_23_P93727   | SDK1         | Hs.653013 | sidekick homolog 1, cell adhesion molecule (chicken)                           | Homo sapiens sidekick homolog 1, cell adhesion molecule (chicken) (SDK1), transcript variant 1, mRNA [NM_152744]                                                             | 2.05782 | up | 9.52668 | up | 7.77630      | 3.91289     | 35.81147     | 3.31471     | Compromised | Compromised | Detected    | Compromised |
| 3373 | A_32_P206293  | ZNF322A      | Hs.126280 | zinc finger protein 322A                                                       | Homo sapiens zinc finger protein 322A (ZNF322A), mRNA [NM_024639]                                                                                                            | 2.05712 | up | 1.96207 | up | 6251.20070   | 3146.57150  | 5245.45260   | 2357.40330  | Detected    | Detected    | Detected    | Detected    |
| 3374 | A_24_P153576  | SHPRH        | Hs.124537 | SNF2 histone linker PHD RING helicase                                          | Homo sapiens SNF2 histone linker PHD RING helicase (SHPRH), transcript variant 2, mRNA [NM_173082]                                                                           | 2.05697 | up | 2.31727 | up | 516.04860    | 259.77438   | 360.71646    | 137.26318   | Detected    | Detected    | Detected    | Detected    |
| 3375 | A_33_P3310366 | LOC100289097 | Hs.529357 | hypothetical protein LOC100289097                                              | PREDICTED: Homo sapiens hypothetical protein LOC100289097 (LOC100289097), mRNA [XM_002343891]                                                                                | 2.05668 | up | 2.25017 | up | 1214.21130   | 611.31036   | 1422.26090   | 557.35130   | Detected    | Detected    | Detected    | Detected    |
| 3376 | A_33_P3362048 |              |           |                                                                                | Serine hydroxymethyltransferase, cytosolic (SHMT)(Serine methylase)(EC 2.1.2.1)(Glycine hydroxymethyltransferase) [Source:UniProtKB/Swiss-Prot;Acc:P34896] [ENST00000395682] | 2.05641 | up | 1.25732 | up | 153.98758    | 77.53721    | 26.00205     | 18.23591    | Detected    | Detected    | Detected    | Detected    |
| 3377 | A_23_P158829  | ARRB2        | Hs.435811 | arrestin, beta 2                                                               | Homo sapiens arrestin, beta 2 (ARRB2), transcript variant 1, mRNA [NM_004313]                                                                                                | 2.05624 | up | 1.96786 | up | 999.16660    | 503.14874   | 1035.24570   | 463.88920   | Detected    | Detected    | Detected    | Detected    |
| 3378 | A_33_P3372266 |              | Hs.719643 |                                                                                | V3-4 protein Fragment [Source:UniProtKB/TrEMBL;Acc:Q5NV62] [ENST00000390283]                                                                                                 | 2.05544 | up | 1.94321 | up | 17.73159     | 8.93256     | 6.95933      | 3.15801     | Detected    | Compromised | Compromised | Compromised |
| 3379 | A_33_P3354688 | LOC730236    | Hs.444913 | hypothetical LOC730236                                                         | PREDICTED: Homo sapiens hypothetical LOC730236 (LOC730236), mRNA [XM_001714412]                                                                                              | 2.05493 | up | 1.93564 | up | 243.22270    | 122.55770   | 176.38902    | 80.35494    | Detected    | Detected    | Detected    | Detected    |
| 3380 | A_33_P3282213 |              |           |                                                                                |                                                                                                                                                                              | 2.05491 | up | 2.49007 | up | 56.28019     | 28.35936    | 59.08872     | 20.92463    | Detected    | Detected    | Detected    | Detected    |
| 3381 | A_33_P3327140 |              |           |                                                                                |                                                                                                                                                                              | 2.05467 | up | 3.07602 | up | 2529.34030   | 1274.67200  | 201.80990    | 57.85199    | Detected    | Detected    | Detected    | Detected    |
| 3382 | A_23_P330070  | TFPI         | Hs.516578 | tissue factor pathway inhibitor (lipoprotein-associated coagulation inhibitor) | Homo sapiens tissue factor pathway inhibitor (lipoprotein-associated coagulation inhibitor) (TFPI), transcript variant 2, mRNA [NM_001032281]                                | 2.05438 | up | 2.25226 | up | 8663.04800   | 4366.39800  | 7773.44970   | 3043.41240  | Detected    | Detected    | Detected    | Detected    |
| 3383 | A_23_P51487   | GBP3         | Hs.720167 | guanylate binding protein 3                                                    | Homo sapiens guanylate binding protein 3 (GBP3), mRNA [NM_018284]                                                                                                            | 2.05436 | up | 2.03052 | up | 1450.15670   | 730.92300   | 956.53015    | 415.39127   | Detected    | Detected    | Detected    | Detected    |
| 3384 | A_24_P110354  | C5orf50      | Hs.591740 | chromosome 5 open reading frame 50                                             | Uncharacterized protein C5orf50 [Source:UniProtKB/Swiss-Prot;Acc:A6NLE4] [ENST00000330910]                                                                                   | 2.05403 | up | 1.31073 | up | 12.36656     | 6.23413     | 7.95305      | 5.35041     | Detected    | Compromised | Compromised | Compromised |
| 3385 | A_23_P217737  | ATP7A        | Hs.496414 | ATPase, Cu <sup>+</sup> transporting, alpha polypeptide                        | Homo sapiens ATPase, Cu <sup>+</sup> transporting, alpha polypeptide (ATP7A), mRNA [NM_000052]                                                                               | 2.05394 | up | 1.94425 | up | 603.74194    | 304.36680   | 388.37433    | 176.14241   | Detected    | Detected    | Detected    | Detected    |
| 3386 | A_32_P71113   | SCAI         | Hs.59504  | suppressor of cancer cell invasion                                             | Homo sapiens suppressor of cancer cell invasion (SCAI), transcript variant 1, mRNA [NM_173690]                                                                               | 2.05390 | up | 2.27183 | up | 834.49280    | 420.70420   | 693.85754    | 269.31460   | Detected    | Detected    | Detected    | Detected    |
| 3387 | A_23_P1782    | CD82         | Hs.527778 | CD82 molecule                                                                  | Homo sapiens CD82 molecule (CD82), transcript variant 1, mRNA [NM_002231]                                                                                                    | 2.05348 | up | 1.89783 | up | 5175.19870   | 2609.57960  | 4271.47950   | 1984.65810  | Detected    | Detected    | Detected    | Detected    |
| 3388 | A_24_P649388  | C21orf63     | Hs.208358 | chromosome 21 open reading frame 63                                            | Homo sapiens chromosome 21 open reading frame 63 (C21orf63), mRNA [NM_058187]                                                                                                | 2.05339 | up | 1.92852 | up | 180.68794    | 91.11498    | 229.37073    | 104.87658   | Detected    | Detected    | Detected    | Detected    |
| 3389 | A_32_P83845   | HEY1         | Hs.234434 | hairly/enhancer-of-split related with YRPW motif 1                             | Homo sapiens hairy/enhancer-of-split related with YRPW motif 1 (HEY1), transcript variant 2, mRNA [NM_01040708]                                                              | 2.05310 | up | 2.08431 | up | 1826.20000   | 921.02435   | 1203.56470   | 509.18073   | Detected    | Detected    | Detected    | Detected    |
| 3390 | A_23_P423864  | PHC2         | Hs.524271 | polyhomeotic homolog 2 (Drosophila)                                            | Homo sapiens polyhomeotic homolog 2 (Drosophila) (PHC2), transcript variant 1, mRNA [NM_198040]                                                                              | 2.05252 | up | 1.59595 | up | 107648.39000 | 54306.70700 | 100621.29000 | 55595.08000 | Detected    | Detected    | Detected    | Detected    |
| 3391 | A_23_P203645  | CREBZF       | Hs.535319 | CREB/ATF bZIP transcription factor                                             | Homo sapiens CREB/ATF bZIP transcription factor (CREBZF), transcript variant 1, mRNA [NM_001039618]                                                                          | 2.05244 | up | 1.84864 | up | 720.37640    | 363.43085   | 517.71320    | 246.94660   | Detected    | Detected    | Detected    | Detected    |

|      |               |              |           |                                                                       |                                                                                                                                                 |         |    |         |    |             |            |             |            |          |             |             |             |
|------|---------------|--------------|-----------|-----------------------------------------------------------------------|-------------------------------------------------------------------------------------------------------------------------------------------------|---------|----|---------|----|-------------|------------|-------------|------------|----------|-------------|-------------|-------------|
| 3392 | A_23_P399797  | SMAD5OS      | Hs.59666  | SMAD family member 5 opposite strand                                  | Homo sapiens SMAD family member 5 opposite strand (SMAD5OS), non-coding RNA [NR_026763]                                                         | 2.05234 | up | 1.79029 | up | 108.36507   | 54.67307   | 120.71563   | 59.45725   | Detected | Detected    | Detected    | Detected    |
| 3393 | A_33_P3343616 |              |           |                                                                       | PHD finger protein 12 (PHD factor 1)(PF1) [Source:UniProtKB/Swiss-Prot;Acc:Q96018] [ENST00000378979]                                            | 2.05226 | up | 1.67497 | up | 75.29411    | 37.98934   | 59.39712    | 31.26974   | Detected | Detected    | Detected    | Detected    |
| 3394 | A_24_P275828  | PGAP3        | Hs.462971 | post-GPI attachment to proteins 3                                     | Homo sapiens post-GPI attachment to proteins 3 (PGAP3), mRNA [NM_033419]                                                                        | 2.05161 | up | 1.88530 | up | 1682.33190  | 849.08150  | 2074.93360  | 970.48596  | Detected | Detected    | Detected    | Detected    |
| 3395 | A_23_P436369  | FILIP1       | Hs.696158 | filamin A interacting protein 1                                       | Homo sapiens filamin A interacting protein 1 (FILIP1), mRNA [NM_015687]                                                                         | 2.05130 | up | 2.19558 | up | 24.33135    | 12.28200   | 18.19578    | 7.30780    | Detected | Compromised | Detected    | Compromised |
| 3396 | A_32_P790284  | KATNAL2      | Hs.404137 | katanin p60 subunit A-like 2                                          | Homo sapiens katanin p60 subunit A-like 2 (KATNAL2), mRNA [NM_031303]                                                                           | 2.05115 | up | 2.16987 | up | 34.35020    | 17.34065   | 22.95685    | 9.32918    | Detected | Detected    | Detected    | Compromised |
| 3397 | A_33_P3225022 | FTCD         | Hs.415846 | formiminotransferase cyclodeaminase                                   | Homo sapiens formiminotransferase cyclodeaminase (FTCD), transcript variant A, mRNA [NM_206965]                                                 | 2.05106 | up | 1.25670 | up | 25.94466    | 13.09793   | 17.52461    | 12.29656   | Detected | Compromised | Detected    | Compromised |
| 3398 | A_33_P3257451 | SRRM3        | Hs.511025 | serine/arginine repetitive matrix 3                                   | Homo sapiens serine/arginine repetitive matrix 3 (SRRM3), mRNA [NM_001110199]                                                                   | 2.04991 | up | 1.37959 | up | 79.56191    | 40.18864   | 63.33167    | 40.47966   | Detected | Detected    | Detected    | Detected    |
| 3399 | A_24_P942068  | TANC2        | Hs.410889 | tetratricopeptide repeat, ankyrin repeat and coiled-coil containing 2 | Homo sapiens tetratricopeptide repeat, ankyrin repeat and coiled-coil containing 2 (TANC2), mRNA [NM_025185]                                    | 2.04969 | up | 2.17518 | up | 3517.52950  | 1776.97780 | 2238.01370  | 907.26086  | Detected | Detected    | Detected    | Detected    |
| 3400 | A_33_P3227857 | COX18        | Hs.356697 | COX18 cytochrome c oxidase assembly homolog (S. cerevisiae)           | Homo sapiens COX18 cytochrome c oxidase assembly homolog (S. cerevisiae) (COX18), nuclear gene encoding mitochondrial protein, mRNA [NM_173827] | 2.04956 | up | 1.87596 | up | 65.72430    | 33.20455   | 59.11636    | 27.78757   | Detected | Detected    | Detected    | Detected    |
| 3401 | A_24_P405981  | TTC33        | Hs.348915 | tetratricopeptide repeat domain 33                                    | Homo sapiens tetratricopeptide repeat domain 33 (TTC33), mRNA [NM_012382]                                                                       | 2.04952 | up | 2.54447 | up | 147.14912   | 74.34261   | 97.39520    | 33.75249   | Detected | Detected    | Detected    | Detected    |
| 3402 | A_23_P153320  | ICAM1        | Hs.643447 | intercellular adhesion molecule 1                                     | Homo sapiens intercellular adhesion molecule 1 (ICAM1), mRNA [NM_000201]                                                                        | 2.04758 | up | 1.84136 | up | 3194.19000  | 1615.29640 | 2412.40380  | 1155.25070 | Detected | Detected    | Detected    | Detected    |
| 3403 | A_33_P3313456 | CXorf30      | Hs.632791 | chromosome X open reading frame 30                                    | Homo sapiens chromosome X open reading frame 30 (CXorf30), mRNA [NM_001098843]                                                                  | 2.04711 | up | 1.02482 | up | 189.91864   | 96.06388   | 25.48234    | 21.92592   | Detected | Detected    | Detected    | Detected    |
| 3404 | A_23_P103864  | TTC13        | Hs.424788 | tetratricopeptide repeat domain 13                                    | Homo sapiens tetratricopeptide repeat domain 13 (TTC13), transcript variant 1, mRNA [NM_024525]                                                 | 2.04693 | up | 2.06538 | up | 478.16202   | 241.88254  | 318.28357   | 135.88731  | Detected | Detected    | Detected    | Detected    |
| 3405 | A_23_P101829  | LPAR2        | Hs.122575 | lysophosphatidic acid receptor 2                                      | Homo sapiens lysophosphatidic acid receptor 2 (LPAR2), mRNA [NM_004720]                                                                         | 2.04622 | up | 2.01584 | up | 148.92572   | 75.36151   | 117.43903   | 51.37141   | Detected | Detected    | Detected    | Detected    |
| 3406 | A_33_P3406090 |              |           |                                                                       |                                                                                                                                                 | 2.04608 | up | 1.81612 | up | 642.62665   | 325.21353  | 572.89750   | 278.16162  | Detected | Detected    | Detected    | Detected    |
| 3407 | A_23_P316974  | SYNJ2        | Hs.434494 | synaptojanin 2                                                        | Homo sapiens synaptojanin 2 (SYNJ2), mRNA [NM_003898]                                                                                           | 2.04598 | up | 2.12186 | up | 1011.67194  | 512.00070  | 973.11660   | 404.40220  | Detected | Detected    | Detected    | Detected    |
| 3408 | A_33_P3284883 | MOBK12B      | Hs.369022 | MOB1, Mps One Binder kinase activator-like 2B (yeast)                 | Homo sapiens MOB1, Mps One Binder kinase activator-like 2B (yeast) (MOBK12B), mRNA [NM_024761]                                                  | 2.04587 | up | 3.82452 | up | 16.59954    | 8.40139    | 10.70973    | 2.46926    | Detected | Compromised | Compromised | Compromised |
| 3409 | A_32_P86118   | PM20D2       | Hs.356247 | peptidase M20 domain containing 2                                     | Homo sapiens peptidase M20 domain containing 2 (PM20D2), mRNA [NM_001010853]                                                                    | 2.04562 | up | 2.11688 | up | 400.22160   | 202.58540  | 294.15616   | 122.53121  | Detected | Detected    | Detected    | Detected    |
| 3410 | A_23_P94762   | ZNF354B      | Hs.591734 | zinc finger protein 354B                                              | Homo sapiens zinc finger protein 354B (ZNF354B), mRNA [NM_058230]                                                                               | 2.04526 | up | 1.84410 | up | 684.70250   | 346.64633  | 510.58620   | 244.14685  | Detected | Detected    | Detected    | Detected    |
| 3411 | A_32_P18547   | C21orf57     | Hs.474066 | chromosome 21 open reading frame 57                                   | Homo sapiens chromosome 21 open reading frame 57 (C21orf57), transcript variant 1, mRNA [NM_058181]                                             | 2.04426 | up | 2.04937 | up | 2755.58980  | 1395.76220 | 2809.18240  | 1208.71850 | Detected | Detected    | Detected    | Detected    |
| 3412 | A_23_P61960   | ATP6V0E2     | Hs.698060 | ATPase, H+ transporting V0 subunit e2                                 | Homo sapiens ATPase, H+ transporting V0 subunit e2 (ATP6V0E2), transcript variant 1, mRNA [NM_145230]                                           | 2.04410 | up | 1.82030 | up | 158.59523   | 80.33794   | 135.52759   | 65.65247   | Detected | Detected    | Detected    | Detected    |
| 3413 | A_24_P942030  | VAMP4        | Hs.605606 | vesicle-associated membrane protein 4                                 | Vesicle-associated membrane protein 4 (VAMP-4) [Source:UniProtKB/Swiss-Prot;Acc:O75379] [ENST00000401589]                                       | 2.04409 | up | 2.12404 | up | 1327.01950  | 672.21920  | 812.83330   | 337.44666  | Detected | Detected    | Detected    | Detected    |
| 3414 | A_24_P350200  | LOC100288418 | Hs.703561 | similar to OK/SW-CL16                                                 | PREDICTED: Homo sapiens similar to OK/SW-CL16 (LOC100288418), mRNA [XM_002342023]                                                               | 2.04367 | up | 2.14273 | up | 19471.42800 | 9865.50400 | 20811.10700 | 8564.31000 | Detected | Detected    | Detected    | Detected    |
| 3415 | A_33_P3319880 | EVC2         | Hs.87306  | Ellis van Creveld syndrome 2                                          | Homo sapiens Ellis van Creveld syndrome 2 (EVC2), transcript variant 2, mRNA [NM_001166136]                                                     | 2.04350 | up | 1.76445 | up | 613.05164   | 310.63870  | 533.17560   | 266.45636  | Detected | Detected    | Detected    | Detected    |
| 3416 | A_23_P394377  | KCNRG        | Hs.660161 | potassium channel regulator                                           | Homo sapiens potassium channel regulator (KCNRG), transcript variant 2, mRNA [NM_189464]                                                        | 2.04338 | up | 1.95998 | up | 47.57196    | 24.10659   | 37.27490    | 16.76990   | Detected | Detected    | Detected    | Detected    |
| 3417 | A_33_P3301034 | LRRC28       | Hs.578684 | leucine rich repeat containing 28                                     | Homo sapiens leucine rich repeat containing 28 (LRRC28), mRNA [NM_144598]                                                                       | 2.04333 | up | 2.24380 | up | 55.32303    | 28.03498   | 31.46162    | 12.36410   | Detected | Detected    | Detected    | Compromised |
| 3418 | A_32_P3534    | LOC145814    | Hs.592021 | pyroglutamil-peptidase 1-like                                         | Homo sapiens pyroglutamil-peptidase 1-like (LOC145814), mRNA [NM_001102612]                                                                     | 2.04331 | up | 1.49709 | up | 27.79167    | 14.08358   | 18.44430    | 10.86374   | Detected | Compromised | Compromised | Compromised |
| 3419 | A_33_P3371904 | ASTN2        | Hs.601562 | astrotactin 2                                                         | Homo sapiens astrotactin 2 (ASTN2), transcript variant 4, mRNA [NM_198188]                                                                      | 2.04331 | up | 1.82919 | up | 92.23288    | 46.73956   | 87.10658    | 41.99103   | Detected | Detected    | Detected    | Detected    |
| 3420 | A_33_P3396129 |              | Hs.275675 |                                                                       | Katanin p80 WD40-containing subunit B1 (Katanin p80 subunit B1)(p80 katanin) [Source:UniProtKB/Swiss-Prot;Acc:Q9BVA0] [ENST00000394326]         | 2.04305 | up | 1.50580 | up | 727.39954   | 368.66116  | 138.86047   | 81.31601   | Detected | Detected    | Detected    | Detected    |
| 3421 | A_23_P411833  | WDR90        | Hs.511903 | WD repeat domain 90                                                   | Homo sapiens WD repeat domain 90 (WDR90), mRNA [NM_145294]                                                                                      | 2.04303 | up | 1.92761 | up | 6949.26070  | 3522.06450 | 5872.54300  | 2686.40550 | Detected | Detected    | Detected    | Detected    |

|      |               |              |           |                                                                                 |                                                                                                                                              |         |    |         |    |            |            |            |            |          |             |             |             |
|------|---------------|--------------|-----------|---------------------------------------------------------------------------------|----------------------------------------------------------------------------------------------------------------------------------------------|---------|----|---------|----|------------|------------|------------|------------|----------|-------------|-------------|-------------|
| 3422 | A_33_P3299882 | UQCRB        | Hs.131255 | ubiquinol-cytochrome c reductase binding protein                                | Homo sapiens ubiquinol-cytochrome c reductase binding protein (UQCRB), nuclear gene encoding mitochondrial protein, mRNA [NM_006294]         | 2.04217 | up | 2.05760 | up | 206.06020  | 104.48071  | 152.63470  | 65.41221   | Detected | Detected    | Detected    | Detected    |
| 3423 | A_24_P196372  | AGBL5        | Hs.138207 | ATP/GTP binding protein-like 5                                                  | Homo sapiens ATP/GTP binding protein-like 5 (AGBL5), transcript variant 3, mRNA [NM_001035507]                                               | 2.04209 | up | 1.61233 | up | 643.01843  | 326.04742  | 471.79900  | 258.02905  | Detected | Detected    | Detected    | Detected    |
| 3424 | A_33_P3379841 | CG030        | Hs.658751 | hypothetical CG030                                                              | Homo sapiens hypothetical CG030 (CG030), non-coding RNA [NR_026928]                                                                          | 2.04208 | up | 2.47919 | up | 126.17167  | 63.97669   | 81.37260   | 28.94234   | Detected | Detected    | Detected    | Detected    |
| 3425 | A_33_P3403232 | LOC100128336 | Hs.570448 | hypothetical LOC100128336                                                       | PREDICTED: Homo sapiens hypothetical LOC100128336 (LOC100128336), mRNA [XM_001715173]                                                        | 2.04106 | up | 3.31889 | up | 17.69089   | 8.97486    | 9.57553    | 2.54411    | Detected | Compromised | Compromised | Compromised |
| 3426 | A_33_P3764802 | SIRT5        | Hs.567431 | sirtuin (silent mating type information regulation 2 homolog) 5 (S. cerevisiae) | Homo sapiens sirtuin (silent mating type information regulation 2 homolog) 5 (S. cerevisiae) (SIRT5), transcript variant 1, mRNA [NM_012241] | 2.03964 | up | 2.12617 | up | 440.43008  | 223.59177  | 401.69473  | 166.59550  | Detected | Detected    | Detected    | Detected    |
| 3427 | A_24_P144773  | RNF145       | Hs.720757 | ring finger protein 145                                                         | Homo sapiens ring finger protein 145 (RNF145), mRNA [NM_144726]                                                                              | 2.03958 | up | 2.00722 | up | 70.67612   | 35.88099   | 68.32006   | 30.01358   | Detected | Detected    | Detected    | Detected    |
| 3428 | A_33_P3320272 | TMEM79       | Hs.347408 | transmembrane protein 79                                                        | Homo sapiens transmembrane protein 79 (TMEM79), transcript variant 1, mRNA [NM_032323]                                                       | 2.03945 | up | 1.50319 | up | 171.55551  | 87.10136   | 163.55531  | 95.94391   | Detected | Detected    | Detected    | Detected    |
| 3429 | A_33_P3260572 | CLIP4        | Hs.122927 | CAP-GLY domain containing linker protein family, member 4                       | Homo sapiens CAP-GLY domain containing linker protein family, member 4 (CLIP4), mRNA [NM_024692]                                             | 2.03936 | up | 2.33752 | up | 428.92914  | 217.78299  | 343.21387  | 129.47177  | Detected | Detected    | Detected    | Detected    |
| 3430 | A_23_P150950  | ZFC3H1       | Hs.527874 | zinc finger, C3H1-type containing                                               | Homo sapiens zinc finger, C3H1-type containing (ZFC3H1), mRNA [NM_144982]                                                                    | 2.03907 | up | 1.87789 | up | 1582.86830 | 803.79480  | 1354.26700 | 635.91440  | Detected | Detected    | Detected    | Detected    |
| 3431 | A_23_P28688   | CPSF3        | Hs.515972 | cleavage and polyadenylation specific factor 3, 73kDa                           | Homo sapiens cleavage and polyadenylation specific factor 3, 73kDa (CPSF3), mRNA [NM_016207]                                                 | 2.03842 | up | 2.07421 | up | 2878.60990 | 1462.25480 | 1886.91780 | 802.16736  | Detected | Detected    | Detected    | Detected    |
| 3432 | A_33_P3216803 |              |           |                                                                                 |                                                                                                                                              | 2.03830 | up | 1.55467 | up | 29.44365   | 14.95739   | 31.49377   | 17.86284   | Detected | Compromised | Detected    | Detected    |
| 3433 | A_33_P3276369 | HSD17B7      | Hs.492925 | hydroxysteroid (17-beta) dehydrogenase 7                                        | Homo sapiens hydroxysteroid (17-beta) dehydrogenase 7 (HSD17B7), mRNA [NM_016371]                                                            | 2.03802 | up | 1.68856 | up | 111.05358  | 56.42326   | 118.17542  | 61.71288   | Detected | Detected    | Detected    | Detected    |
| 3434 | A_33_P3314441 | FBXL17       | Hs.721914 | F-box and leucine-rich repeat protein 17                                        | Homo sapiens F-box and leucine-rich repeat protein 17 (FBXL17), mRNA [NM_001163315]                                                          | 2.03773 | up | 1.66442 | up | 156.44655  | 79.49745   | 108.74220  | 57.61035   | Detected | Detected    | Detected    | Detected    |
| 3435 | A_33_P3378644 | PHC1         | Hs.305985 | polyhomeotic homolog 1 (Drosophila)                                             | Homo sapiens polyhomeotic homolog 1 (Drosophila) (PHC1), mRNA [NM_004426]                                                                    | 2.03705 | up | 1.71508 | up | 1189.55530 | 604.66614  | 1267.16880 | 651.50024  | Detected | Detected    | Detected    | Detected    |
| 3436 | A_33_P3376341 | LRRCC24      | Hs.715747 | leucine rich repeat containing 24                                               | Homo sapiens leucine rich repeat containing 24 (LRRCC24), mRNA [NM_001024678]                                                                | 2.03626 | up | 1.85053 | up | 563.64510  | 286.61996  | 642.87860  | 306.33542  | Detected | Detected    | Detected    | Detected    |
| 3437 | A_23_P411922  | PRPF40B      | Hs.706827 | PRP40 pre-mRNA processing factor 40 homolog B (S. cerevisiae)                   | Homo sapiens PRP40 pre-mRNA processing factor 40 homolog B (S. cerevisiae) (PRPF40B), transcript variant 1, mRNA [NM_001031698]              | 2.03622 | up | 1.99739 | up | 335.70792  | 170.71419  | 304.64316  | 134.49140  | Detected | Detected    | Detected    | Detected    |
| 3438 | A_24_P379693  | DNPEP        | Hs.258551 | aspartyl aminopeptidase                                                         | Homo sapiens aspartyl aminopeptidase (DNPEP), mRNA [NM_012100]                                                                               | 2.03527 | up | 1.57925 | up | 402.50412  | 204.77686  | 245.53162  | 137.09543  | Detected | Detected    | Detected    | Detected    |
| 3439 | A_32_P32905   |              |           |                                                                                 |                                                                                                                                              | 2.03504 | up | 2.17460 | up | 74.30033   | 37.80515   | 78.44148   | 31.80772   | Detected | Detected    | Detected    | Detected    |
| 3440 | A_33_P3360867 |              |           |                                                                                 |                                                                                                                                              | 2.03500 | up | 1.56356 | up | 489.32315  | 248.97968  | 224.25668  | 126.47250  | Detected | Detected    | Detected    | Detected    |
| 3441 | A_33_P3349455 | LOC644525    |           | hypothetical LOC644525                                                          | PREDICTED: Homo sapiens hypothetical LOC644525 (LOC644525), mRNA [XM_001727018]                                                              | 2.03459 | up | 1.99469 | up | 322.67600  | 164.21909  | 303.76400  | 134.28445  | Detected | Detected    | Detected    | Detected    |
| 3442 | A_23_P57658   | HRASLS       | Hs.36761  | HRAS-like suppressor                                                            | Homo sapiens HRAS-like suppressor (HRASLS), mRNA [NM_020386]                                                                                 | 2.03420 | up | 2.18461 | up | 46.14607   | 23.48953   | 31.62794   | 12.76622   | Detected | Detected    | Detected    | Detected    |
| 3443 | A_33_P3415211 | MPV17        | Hs.75659  | MpV17 mitochondrial inner membrane protein                                      | Homo sapiens MpV17 mitochondrial inner membrane protein (MPV17), nuclear gene encoding mitochondrial protein, mRNA [NM_002437]               | 2.03416 | up | 1.92661 | up | 3994.58800 | 2033.38800 | 3847.93870 | 1761.16850 | Detected | Detected    | Detected    | Detected    |
| 3444 | A_32_P108826  | ZBTB41       | Hs.529439 | zinc finger and BTB domain containing 41                                        | Homo sapiens zinc finger and BTB domain containing 41 (ZBTB41), mRNA [NM_194314]                                                             | 2.03403 | up | 2.62488 | up | 542.62000  | 276.23087  | 391.21097  | 131.42178  | Detected | Detected    | Detected    | Detected    |
| 3445 | A_23_P417282  | IGF1R        | Hs.643120 | insulin-like growth factor 1 receptor                                           | Homo sapiens insulin-like growth factor 1 receptor (IGF1R), mRNA [NM_000875]                                                                 | 2.03385 | up | 2.04250 | up | 3364.82150 | 1713.07500 | 3176.18550 | 1371.22660 | Detected | Detected    | Detected    | Detected    |
| 3446 | A_24_P53215   | UNC13D       | Hs.41045  | unc-13 homolog D (C. elegans)                                                   | Homo sapiens unc-13 homolog D (C. elegans) (UNC13D), mRNA [NM_199242]                                                                        | 2.03369 | up | 1.76160 | up | 23.37373   | 11.90080   | 21.79528   | 10.90988   | Detected | Compromised | Detected    | Compromised |
| 3447 | A_33_P3329759 | P2RY11       | Hs.14468  | purinergic receptor P2Y, G-protein coupled, 11                                  | Homo sapiens purinergic receptor P2Y, G-protein coupled, 11 (P2RY11), mRNA [NM_002566]                                                       | 2.03362 | up | 1.89404 | up | 291.85614  | 148.60430  | 156.61029  | 72.91163   | Detected | Detected    | Detected    | Detected    |
| 3448 | A_33_P3272090 | PDE4DIP      | Hs.568247 | phosphodiesterase 4D interacting protein                                        | Homo sapiens phosphodiesterase 4D interacting protein (PDE4DIP), transcript variant 1, mRNA [NM_014644]                                      | 2.03296 | up | 2.09810 | up | 1220.03310 | 621.40550  | 1041.96360 | 437.91745  | Detected | Detected    | Detected    | Detected    |
| 3449 | A_33_P3325502 | ARHGAP29     | Hs.483238 | Rho GTPase activating protein 29                                                | Homo sapiens Rho GTPase activating protein 29 (ARHGAP29), mRNA [NM_024915]                                                                   | 2.03222 | up | 2.31679 | up | 132.72836  | 67.62807   | 89.85413   | 34.19935   | Detected | Detected    | Detected    | Detected    |
| 3450 | A_33_P3347417 | SPEN         | Hs.558463 | spen homolog, transcriptional regulator (Drosophila)                            | Homo sapiens spen homolog, transcriptional regulator (Drosophila) (SPEN), mRNA [NM_015001]                                                   | 2.03213 | up | 1.01164 | up | 555.16270  | 282.87933  | 79.45810   | 69.25946   | Detected | Detected    | Detected    | Detected    |
| 3451 | A_33_P3271176 | LOC100130057 | Hs.689458 | hypothetical protein LOC100130057                                               | Homo sapiens cDNA FLJ46686 fis. clone TRACH3011454, [AK128528]                                                                               | 2.03195 | up | 4.22272 | up | 19.54599   | 9.96043    | 23.31935   | 4.86956    | Detected | Compromised | Detected    | Compromised |
| 3452 | A_33_P3414789 | FSD1         | Hs.28144  | fibronectin type III and SPRY domain containing 1                               | Homo sapiens fibronectin type III and SPRY domain containing 1 (FSD1), mRNA [NM_024333]                                                      | 2.03161 | up | 2.81214 | up | 2303.09200 | 1173.82410 | 1043.62500 | 327.24472  | Detected | Detected    | Detected    | Detected    |

|      |               |               |           |                                                                                                                                                                                               |         |    |         |    |              |              |              |              |          |             |             |             |
|------|---------------|---------------|-----------|-----------------------------------------------------------------------------------------------------------------------------------------------------------------------------------------------|---------|----|---------|----|--------------|--------------|--------------|--------------|----------|-------------|-------------|-------------|
| 3453 | A_33_P3380883 | XPA           | Hs.654364 | xeroderma pigmentosum, complementation group A (XPA), transcript variant 2, non-coding RNA [NR_027302]                                                                                        | 2.03156 | up | 1.83503 | up | 119.18170    | 60.74545     | 115.25208    | 55.38242     | Detected | Detected    | Detected    | Detected    |
| 3454 | A_24_P315346  | POM121L8P     | Hs.645245 | POM121 membrane glycoprotein-like 8 (rat) pseudogene [POM121L8P], non-coding RNA [NR_024583]                                                                                                  | 2.03118 | up | 1.73828 | up | 35.23831     | 17.96387     | 17.35339     | 8.80298      | Detected | Detected    | Detected    | Compromised |
| 3455 | A_23_P4611    | SLC27A5       | Hs.292177 | solute carrier family 27 (fatty acid transporter), member 5 (SLC27A5), mRNA [NM_012254]                                                                                                       | 2.03117 | up | 2.05837 | up | 2012.86770   | 1026.13040   | 2095.60720   | 897.74304    | Detected | Detected    | Detected    | Detected    |
| 3456 | A_33_P3299781 |               |           | DDRKG domain-containing protein 1 Precursor [Source:UniProtKB/Swiss-Prot;Acc:Q96HY6] [ENST00000380201]                                                                                        | 2.03096 | up | 2.31188 | up | 409.82780    | 208.94539    | 279.29050    | 106.52638    | Detected | Detected    | Detected    | Detected    |
| 3457 | A_23_P46369   | RAB13         | Hs.151536 | RAB13, member RAS oncogene family (RAB13), mRNA [NM_002870]                                                                                                                                   | 2.03025 | up | 2.11466 | up | 8092.15600   | 4127.13600   | 5463.58540   | 2278.25900   | Detected | Detected    | Detected    | Detected    |
| 3458 | A_24_P267293  | SARM1         | Hs.719354 | sterile alpha and TIR motif containing 1 (SARM1), mRNA [NM_015077]                                                                                                                            | 2.03000 | up | 1.78930 | up | 159.31409    | 81.26252     | 190.04422    | 93.65626     | Detected | Detected    | Detected    | Detected    |
| 3459 | A_23_P251717  | WDR45         | Hs.632807 | WD repeat domain 45 (WDR45), transcript variant 1, mRNA [NM_007075]                                                                                                                           | 2.02945 | up | 1.88486 | up | 9483.54200   | 4838.65970   | 7956.72070   | 3722.37840   | Detected | Detected    | Detected    | Detected    |
| 3460 | A_33_P3291541 | TMCO4         | Hs.656313 | transmembrane and coiled-coil domains 4 (TMCO4), mRNA [NM_181719]                                                                                                                             | 2.02808 | up | 1.83849 | up | 197.04329    | 100.60291    | 165.69464    | 79.47163     | Detected | Detected    | Detected    | Detected    |
| 3461 | A_23_P327069  | KIAA0232      | Hs.79276  | KIAA0232 (KIAA0232), transcript variant 1, mRNA [NM_014743]                                                                                                                                   | 2.02798 | up | 1.97479 | up | 5782.31600   | 2952.36940   | 4551.04830   | 2032.15310   | Detected | Detected    | Detected    | Detected    |
| 3462 | A_23_P64873   | DCN           | Hs.156316 | decorin (DCN), transcript variant A1, mRNA [NM_001920]                                                                                                                                        | 2.02796 | up | 1.84134 | up | 295721.12000 | 150992.44000 | 271926.72000 | 130222.02000 | Detected | Detected    | Detected    | Detected    |
| 3463 | A_24_P236522  | CD2BP2        | Hs.202677 | CD2 (cytoplasmic tail) binding protein 2 (CD2BP2), transcript variant 1, mRNA [NM_006110]                                                                                                     | 2.02782 | up | 1.66169 | up | 2107.30520   | 1076.04930   | 1812.92110   | 962.04580    | Detected | Detected    | Detected    | Detected    |
| 3464 | A_33_P3399101 |               |           | Cathepsin L1 Precursor (EC 3.4.22.15) [Major excreted protein] (MEP) [Contains Cathepsin L1 heavy chain; Cathepsin L1 light chain] [Source:UniProtKB/Swiss-Prot;Acc:P07711] [ENST00000342020] | 2.02747 | up | 2.37613 | up | 1029.46080   | 525.76100    | 467.65253    | 173.54770    | Detected | Detected    | Detected    | Detected    |
| 3465 | A_23_P77066   | SNRPN         | Hs.564847 | small nuclear ribonucleoprotein polypeptide N (SNRPN), transcript variant 4, mRNA [NM_022807]                                                                                                 | 2.02738 | up | 1.95032 | up | 1557.26350   | 795.35500    | 1226.43810   | 554.50366    | Detected | Detected    | Detected    | Detected    |
| 3466 | A_32_P173058  | TMEM41B       | Hs.594563 | transmembrane protein 41B (TMEM41B), transcript variant 3, non-coding RNA, 611 [NR_028491]                                                                                                    | 2.02697 | up | 2.00622 | up | 3709.04130   | 1894.72600   | 3209.68770   | 1410.74560   | Detected | Detected    | Detected    | Detected    |
| 3467 | A_23_P74042   | LPHN2         | Hs.24212  | latrophilin 2 (LPHN2), mRNA [NM_012302]                                                                                                                                                       | 2.02681 | up | 2.21088 | up | 530.42377    | 270.98343    | 513.01330    | 204.61094    | Detected | Detected    | Detected    | Detected    |
| 3468 | A_23_P211631  | FBLN1         | Hs.24601  | fibulin 1 (FBLN1), transcript variant D, mRNA [NM_006486]                                                                                                                                     | 2.02587 | up | 1.78050 | up | 82517.62500  | 42176.36700  | 75193.70000  | 37239.53500  | Detected | Detected    | Detected    | Detected    |
| 3469 | A_33_P3378051 | SESTD1        | Hs.30977  | SEC14 and spectrin domains 1 (SESTD1), mRNA [NM_178123]                                                                                                                                       | 2.02569 | up | 2.01067 | up | 177.26598    | 90.61207     | 126.70780    | 55.56847     | Detected | Detected    | Detected    | Detected    |
| 3470 | A_24_P201381  | FGFBP3        | Hs.466120 | fibroblast growth factor binding protein 3 (FGFBP3), mRNA [NM_152429]                                                                                                                         | 2.02470 | up | 1.71829 | up | 158.75125    | 81.18778     | 104.17248    | 53.45922     | Detected | Detected    | Detected    | Detected    |
| 3471 | A_33_P3235716 | SPSB3         | Hs.592080 | splA/ryanodine receptor domain and SOCS box containing 3 (SPSB3), mRNA [NM_090861]                                                                                                            | 2.02445 | up | 2.07555 | up | 27845.76200  | 14242.43200  | 23512.26400  | 9989.12300   | Detected | Detected    | Detected    | Detected    |
| 3472 | A_33_P3297305 | ELMOD3        | Hs.269990 | ELMO/CED-12 domain containing 3 (ELMOD3), transcript variant 1, mRNA [NM_032213]                                                                                                              | 2.02420 | up | 1.82132 | up | 233.60356    | 119.49741    | 313.98727    | 152.01704    | Detected | Detected    | Detected    | Detected    |
| 3473 | A_33_P321009  |               | Hs.518622 | Putative uncharacterized protein ENSP00000371928 [Source:UniProtKB/TrEMBL;Acc:B7WPA2] [ENST00000382488]                                                                                       | 2.02396 | up | 4.63626 | up | 104.93871    | 53.68661     | 51.13940     | 9.72643      | Detected | Detected    | Detected    | Compromised |
| 3474 | A_33_P3211864 | ARMCX4        | Hs.709762 | armadillo repeat containing, X-linked 4 (ARMCX4), non-coding RNA [NR_028407]                                                                                                                  | 2.02365 | up | 2.55067 | up | 53.58374     | 27.41762     | 48.41855     | 16.73875     | Detected | Detected    | Detected    | Detected    |
| 3475 | A_32_P16258   | EXOC6B        | Hs.303454 | Exocyst complex component 6B (Exocyst complex component Sec15B) (SEC15-like protein 2) [Source:UniProtKB/Swiss-Prot;Acc:Q9Y2D4] [ENST00000272427]                                             | 2.02357 | up | 2.14908 | up | 354.08075    | 181.18274    | 262.20260    | 107.58481    | Detected | Detected    | Detected    | Detected    |
| 3476 | A_33_P3404489 | MAMLD1        | Hs.20136  | mastermind-like domain containing 1 (MAMLD1), mRNA [NM_005491]                                                                                                                                | 2.02353 | up | 1.07256 | up | 17.55753     | 8.98434      | 15.65806     | 12.87312     | Detected | Compromised | Compromised | Compromised |
| 3477 | A_23_P99625   | FITM1         | Hs.720731 | fat storage-inducing transmembrane protein 1 (FITM1), mRNA [NM_203402]                                                                                                                        | 2.02339 | up | 3.58726 | up | 33.97564     | 17.38683     | 28.66168     | 7.04538      | Detected | Detected    | Detected    | Compromised |
| 3478 | A_23_P127475  | CCS           | Hs.502917 | copper chaperone for superoxide dismutase (CCS), mRNA [NM_005125]                                                                                                                             | 2.02315 | up | 1.88712 | up | 2320.91360   | 1187.85400   | 2950.43210   | 1378.64120   | Detected | Detected    | Detected    | Detected    |
| 3479 | A_23_P403398  | DKFZP58611420 | Hs.112423 | hypothetical protein DKFZp58611420, non-coding RNA [NR_002186]                                                                                                                                | 2.02314 | up | 2.00147 | up | 574.26776    | 293.91516    | 382.26523    | 168.41551    | Detected | Detected    | Detected    | Detected    |

|      |               |              |           |                                                                     |                                                                                                                                                                                                                                                                |         |  |    |         |  |             |             |             |            |          |             |             |             |
|------|---------------|--------------|-----------|---------------------------------------------------------------------|----------------------------------------------------------------------------------------------------------------------------------------------------------------------------------------------------------------------------------------------------------------|---------|--|----|---------|--|-------------|-------------|-------------|------------|----------|-------------|-------------|-------------|
| 3480 | A_33_P3287428 |              | Hs.663277 |                                                                     | LOC652203 protein [Source:UniProtKB/TrEMBL;Acc:Q32Q44] [ENST00000398305]                                                                                                                                                                                       | 2.02260 |  | up | 1.51634 |  | 114.07018   | 58.39755    | 70.22796    | 40.83948   | Detected | Detected    | Detected    | Detected    |
| 3481 | A_33_P3715909 | LOC648556    | Hs.203594 | uncharacterized gastric protein ZA43P                               | BX118084 NCI_CGAP_Co16 Homo sapiens cDNA clone [MAGp995A105936, mRNA sequence [BX118084]                                                                                                                                                                       | 2.02253 |  | up | 2.29749 |  | 65.62284    | 33.59650    | 33.16374    | 12.72842   | Detected | Detected    | Detected    | Compromised |
| 3482 | A_23_P68155   | IFIH1        | Hs.163173 | interferon induced with helicase C domain 1                         | Homo sapiens interferon induced with helicase C domain 1 (IFIH1), mRNA [NM_022168]                                                                                                                                                                             | 2.02242 |  | up | 2.15125 |  | 210.85533   | 107.97138   | 173.78638   | 71.23462   | Detected | Detected    | Detected    | Detected    |
| 3483 | A_23_P385771  | PAOX         | Hs.532469 | polyamine oxidase (exo-N4-amino)                                    | Homo sapiens polyamine oxidase (exo-N4-amino) (PAOX), transcript variant 1, mRNA [NM_152911]                                                                                                                                                                   | 2.02226 |  | up | 1.91087 |  | 3074.66020  | 1574.31770  | 3012.40230  | 1390.10220 | Detected | Detected    | Detected    | Detected    |
| 3484 | A_33_P3841368 | LOC286161    | Hs.696258 | hypothetical protein LOC286161                                      | Homo sapiens cDNA FLJ32061 fis. clone OCBBF1000030 [AK056623]                                                                                                                                                                                                  | 2.02219 |  | up | 1.82381 |  | 1416.99820  | 725.57130   | 946.41406   | 457.57968  | Detected | Detected    | Detected    | Detected    |
| 3485 | A_33_P3252989 | KIAA0913     | Hs.65135  | KIAA0913                                                            | Homo sapiens KIAA0913 (KIAA0913), mRNA [NM_015037]                                                                                                                                                                                                             | 2.02171 |  | up | 1.77425 |  | 17915.74600 | 9175.89600  | 13435.71200 | 6677.46900 | Detected | Detected    | Detected    | Detected    |
| 3486 | A_33_P3216532 | EPHB4        | Hs.437008 | EPH receptor B4                                                     | Homo sapiens EPH receptor B4 (EPHB4), mRNA [NM_004444]                                                                                                                                                                                                         | 2.02146 |  | up | 1.79733 |  | 5929.46300  | 3037.27250  | 1365.94060  | 670.14680  | Detected | Detected    | Detected    | Detected    |
| 3487 | A_23_P134614  | COG5         | Hs.239631 | component of oligomeric golgi complex 5                             | Homo sapiens component of oligomeric golgi complex 5 (COG5), transcript variant 1, mRNA [NM_006348]                                                                                                                                                            | 2.02083 |  | up | 1.96493 |  | 1950.13530  | 999.23535   | 1546.08230  | 693.82635  | Detected | Detected    | Detected    | Detected    |
| 3488 | A_33_P3573141 | LOC440149    | Hs.41423  | hypothetical LOC440149                                              | Homo sapiens cDNA FLJ32523 fis. clone SMINT2000032 [AK057085]                                                                                                                                                                                                  | 2.02082 |  | up | 1.59688 |  | 13.51431    | 6.92469     | 6.77626     | 3.74182    | Detected | Compromised | Compromised | Compromised |
| 3489 | A_23_P57697   | DHX36        | Hs.446270 | DEAH (Asp-Glu-Ala-His) box polypeptide 36                           | Homo sapiens DEAH (Asp-Glu-Ala-His) box polypeptide 36 (DHX36), transcript variant 1, mRNA [NM_020865]                                                                                                                                                         | 2.01957 |  | up | 2.20916 |  | 5171.26600  | 2651.37900  | 4454.00900  | 1777.82370 | Detected | Detected    | Detected    | Detected    |
| 3490 | A_33_P3252322 | LOC286434    | Hs.657302 | hypothetical protein LOC286434                                      | Homo sapiens cDNA FLJ20463 fis. clone KAT06143 [AK000470]                                                                                                                                                                                                      | 2.01920 |  | up | 4.10379 |  | 117.63922   | 60.32607    | 64.32689    | 13.82207   | Detected | Detected    | Detected    | Compromised |
| 3491 | A_24_P376422  | LOC100286937 | Hs.649203 | similar to HSPC047 protein                                          | HSPC047 protein [Source:UniProtKB/TrEMBL;Acc:Q8IV37] [ENST00000344427]                                                                                                                                                                                         | 2.01840 |  | up | 2.16594 |  | 379.28152   | 194.57547   | 393.49594   | 160.19900  | Detected | Detected    | Detected    | Detected    |
| 3492 | A_23_P250156  | IGF2BP2      | Hs.35354  | insulin-like growth factor 2 mRNA binding protein 2                 | Homo sapiens insulin-like growth factor 2 mRNA binding protein 2 (IGF2BP2), transcript variant 1, mRNA [NM_006548]                                                                                                                                             | 2.01802 |  | up | 1.97412 |  | 1703.69710  | 874.17720   | 1140.71120  | 509.52650  | Detected | Detected    | Detected    | Detected    |
| 3493 | A_24_P412976  | TMEM143      | Hs.351335 | transmembrane protein 143                                           | Homo sapiens transmembrane protein 143 (TMEM143), mRNA [NM_018273]                                                                                                                                                                                             | 2.01792 |  | up | 2.57654 |  | 1692.65010  | 868.55480   | 1457.16190  | 498.69708  | Detected | Detected    | Detected    | Detected    |
| 3494 | A_33_P3360942 | SCAMP1       | Hs.482587 | secretory carrier membrane protein 1                                | Homo sapiens secretory carrier membrane protein 1 (SCAMP1), mRNA [NM_004866]                                                                                                                                                                                   | 2.01771 |  | up | 2.11480 |  | 3079.67200  | 1580.44580  | 1858.23630  | 774.81226  | Detected | Detected    | Detected    | Detected    |
| 3495 | A_33_P3337026 |              |           |                                                                     | Sodium- and chloride-dependent creatine transporter 1 (Creatine transporter 1)(CT1)(Solute carrier family 6 member 8) [Source:UniProtKB/Swiss-Prot;Acc:P48029] [ENST00000328897]                                                                               | 2.01622 |  | up | 1.78995 |  | 1784.18350  | 916.29376   | 674.38580   | 332.22540  | Detected | Detected    | Detected    | Detected    |
| 3496 | A_33_P3212037 |              | Hs.567378 |                                                                     | mRNA-capping enzyme (HCE)(HCAP1) [Includes Polynucleotide 5'-triphosphatase(EC 3.1.3.33)(mRNA 5'-triphosphatase)(TPase);mRNA guanylyltransferase(EC 2.7.7.50)(GTP-RNA guanylyltransferase)(GTase.)] [Source:UniProtKB/Swiss-Prot;Acc:O60942] [ENST00000369475] | 2.01596 |  | up | 1.54370 |  | 15.90678    | 8.17126     | 17.87254    | 10.20911   | Detected | Compromised | Detected    | Compromised |
| 3497 | A_23_P115011  | ADAMTSL4     | Hs.719991 | ADAMTS-like 4                                                       | Homo sapiens ADAMTS-like 4 (ADAMTSL4), transcript variant 1, mRNA [NM_019032]                                                                                                                                                                                  | 2.01560 |  | up | 2.26692 |  | 84.49645    | 43.40765    | 69.13534    | 26.89241   | Detected | Detected    | Detected    | Detected    |
| 3498 | A_33_P3362696 | RIC8B        | Hs.131306 | resistance to inhibitors of cholinesterase 8 homolog B (C. elegans) | Homo sapiens resistance to inhibitors of cholinesterase 8 homolog B (C. elegans) (RIC8B), mRNA [NM_018157]                                                                                                                                                     | 2.01558 |  | up | 2.06849 |  | 1215.74050  | 624.55835   | 806.94110   | 343.99728  | Detected | Detected    | Detected    | Detected    |
| 3499 | A_23_P360209  |              | Hs.723065 |                                                                     | F1262 Human cultured dermal papilla cell cDNA library(F) Homo sapiens cDNA, mRNA sequence [ES309389]                                                                                                                                                           | 2.01525 |  | up | 2.30836 |  | 8614.19400  | 4426.06740  | 4911.44700  | 1876.16430 | Detected | Detected    | Detected    | Detected    |
| 3500 | A_23_P127911  | PAMR1        | Hs.55044  | peptidase domain containing associated with muscle regeneration 1   | Homo sapiens peptidase domain containing associated with muscle regeneration 1 (PAMR1), transcript variant 1, mRNA [NM_015430]                                                                                                                                 | 2.01400 |  | up | 1.82477 |  | 23156.69300 | 11905.55100 | 17066.68400 | 8247.22000 | Detected | Detected    | Detected    | Detected    |
| 3501 | A_33_P3331511 | NCRNA00173   | Hs.441601 | non-protein coding RNA 173                                          | Homo sapiens non-protein coding RNA 173 (NCRNA00173), transcript variant 1, non-coding RNA [NR_027345]                                                                                                                                                         | 2.01340 |  | up | 1.74394 |  | 92.03972    | 47.33468    | 67.60577    | 34.18360   | Detected | Detected    | Detected    | Detected    |
| 3502 | A_24_P307854  | FBXL18       | Hs.623974 | F-box and leucine-rich repeat protein 18                            | Homo sapiens F-box and leucine-rich repeat protein 18 (FBXL18), mRNA [NM_024963]                                                                                                                                                                               | 2.01318 |  | up | 1.80226 |  | 256.32004   | 131.83588   | 212.31584   | 103.87978  | Detected | Detected    | Detected    | Detected    |
| 3503 | A_23_P432573  | MRGPRF       | Hs.118513 | MAS-related GPR, member F                                           | Homo sapiens MAS-related GPR, member F (MRGPRF), transcript variant 2, mRNA [NM_145015]                                                                                                                                                                        | 2.01295 |  | up | 1.69596 |  | 4306.12940  | 2215.06370  | 3712.49240  | 1930.25350 | Detected | Detected    | Detected    | Detected    |
| 3504 | A_23_P53015   | TUT1         | Hs.144835 | terminal uridylyl transferase 1, U6 snRNA-specific                  | Homo sapiens terminal uridylyl transferase 1, U6 snRNA-specific (TUT1), mRNA [NM_022830]                                                                                                                                                                       | 2.01239 |  | up | 1.65077 |  | 330.53714   | 170.07559   | 323.32764   | 172.71152  | Detected | Detected    | Detected    | Detected    |
| 3505 | A_33_P3361746 | TRPS1        | Hs.657018 | trichorhinophalangeal syndrome 1                                    | Homo sapiens trichorhinophalangeal syndrome 1 (TRPS1), mRNA [NM_014112]                                                                                                                                                                                        | 2.01125 |  | up | 2.30365 |  | 577.37760   | 297.25360   | 557.56650   | 213.42545  | Detected | Detected    | Detected    | Detected    |
| 3506 | A_23_P46812   | CPEB3        | Hs.131683 | cytoplasmic polyadenylation element binding protein 3               | Homo sapiens cytoplasmic polyadenylation element binding protein 3 (CPEB3), mRNA [NM_014912]                                                                                                                                                                   | 2.01060 |  | up | 3.23745 |  | 35.20803    | 18.13217    | 22.41621    | 6.10555    | Detected | Detected    | Detected    | Compromised |
| 3507 | A_23_P101905  | APC2         | Hs.446376 | adenomatous polyposis coli 2                                        | Homo sapiens adenomatous polyposis coli 2 (APC2), mRNA [NM_005883]                                                                                                                                                                                             | 2.01008 |  | up | 1.79466 |  | 341.53775   | 175.93759   | 353.33115   | 173.60617  | Detected | Detected    | Detected    | Detected    |

|      |               |              |           |                                                                  |                                                                                                                           |         |    |         |    |             |             |             |             |          |             |             |             |
|------|---------------|--------------|-----------|------------------------------------------------------------------|---------------------------------------------------------------------------------------------------------------------------|---------|----|---------|----|-------------|-------------|-------------|-------------|----------|-------------|-------------|-------------|
| 3508 | A_23_P39616   | ORC2L        | Hs.444870 | origin recognition complex, subunit 2-like (yeast)               | Homo sapiens origin recognition complex, subunit 2-like (yeast) (ORC2L), mRNA [NM_006190]                                 | 2.00988 | up | 2.03166 | up | 702.23940   | 361.78244   | 582.21210   | 252.69390   | Detected | Detected    | Detected    | Detected    |
| 3509 | A_24_P360269  | RNASET2      | Hs.529989 | ribonuclease T2                                                  | Homo sapiens ribonuclease T2 (RNASET2), mRNA [NM_003730]                                                                  | 2.00985 | up | 1.90201 | up | 3395.47300  | 1749.32430  | 3163.65920  | 1466.70500  | Detected | Detected    | Detected    | Detected    |
| 3510 | A_23_P407614  | PYDC1        | Hs.58314  | PYD (pyrin domain) containing 1                                  | Homo sapiens PYD (pyrin domain) containing 1 (PYDC1), mRNA [NM_152901]                                                    | 2.00969 | up | 1.70567 | up | 256.31952   | 132.06440   | 223.31600   | 115.44923   | Detected | Detected    | Detected    | Detected    |
| 3511 | A_24_P175059  | ATG5         | Hs.486063 | ATG5 autophagy related 5 homolog (S. cerevisiae)                 | Homo sapiens ATG5 autophagy related 5 homolog (S. cerevisiae) (ATG5), mRNA [NM_004849]                                    | 2.00919 | up | 2.18893 | up | 1371.62920  | 706.88560   | 994.01890   | 400.43066   | Detected | Detected    | Detected    | Detected    |
| 3512 | A_33_P3379726 | CCDC106      | Hs.82482  | coiled-coil domain containing 106                                | Homo sapiens coiled-coil domain containing 106 (CCDC106), mRNA [NM_013301]                                                | 2.00896 | up | 2.32107 | up | 4646.78860  | 2395.05250  | 5216.44500  | 1981.76600  | Detected | Detected    | Detected    | Detected    |
| 3513 | A_23_P215505  | RAPGEF5      | Hs.174768 | Rap guanine nucleotide exchange factor (GEF) 5                   | Homo sapiens Rap guanine nucleotide exchange factor (GEF) 5 (RAPGEF5), mRNA [NM_012294]                                   | 2.00882 | up | 2.77025 | up | 30.84725    | 15.90043    | 12.38912    | 3.94355     | Detected | Compromised | Compromised | Compromised |
| 3514 | A_33_P3337272 | NRARP        | Hs.535075 | NOTCH-regulated ankyrin repeat protein                           | Homo sapiens NOTCH-regulated ankyrin repeat protein (NRARP), mRNA [NM_001004354]                                          | 2.00820 | up | 1.89463 | up | 161.29518   | 83.16628    | 125.26086   | 58.29841    | Detected | Detected    | Detected    | Detected    |
| 3515 | A_23_P49674   | ARHGEF15     | Hs.443109 | Rho guanine nucleotide exchange factor (GEF) 15                  | Homo sapiens Rho guanine nucleotide exchange factor (GEF) 15 (ARHGEF15), mRNA [NM_173728]                                 | 2.00776 | up | 2.42261 | up | 4193.38130  | 2162.64300  | 425.91107   | 155.02490   | Detected | Detected    | Detected    | Detected    |
| 3516 | A_33_P3318069 | LOC100129295 | Hs.134183 | hypothetical LOC100129295                                        | PREDICTED: Homo sapiens similar to ribosomal protein L22 (LOC100129295), miscRNA [XR_039567]                              | 2.00764 | up | 1.76283 | up | 43.36105    | 22.36383    | 36.83081    | 18.42329    | Detected | Detected    | Detected    | Detected    |
| 3517 | A_23_P28652   | C2orf28      | Hs.9527   | chromosome 2 open reading frame 28                               | Homo sapiens chromosome 2 open reading frame 28 (C2orf28), transcript variant 1, mRNA [NM_016085]                         | 2.00732 | up | 1.94443 | up | 9878.67300  | 5095.82700  | 8108.87060  | 3677.78560  | Detected | Detected    | Detected    | Detected    |
| 3518 | A_23_P86855   | MACROD1      | Hs.602898 | MACRO domain containing 1                                        | Homo sapiens MACRO domain containing 1 (MACROD1), mRNA [NM_014067]                                                        | 2.00699 | up | 2.07395 | up | 739.23590   | 381.39166   | 721.68854   | 306.84390   | Detected | Detected    | Detected    | Detected    |
| 3519 | A_23_P48339   | IFT88        | Hs.187376 | intraflagellar transport 88 homolog (Chlamydomonas)              | Homo sapiens intraflagellar transport 88 homolog (Chlamydomonas) (IFT88), transcript variant 1, mRNA [NM_175605]          | 2.00615 | up | 1.98413 | up | 560.48810   | 289.29114   | 390.32523   | 173.46938   | Detected | Detected    | Detected    | Detected    |
| 3520 | A_23_P333592  | ZNF547       | Hs.446620 | zinc finger protein 547                                          | Homo sapiens zinc finger protein 547 (ZNF547), mRNA [NM_173631]                                                           | 2.00573 | up | 1.95543 | up | 54.15966    | 27.95991    | 39.39948    | 17.76702    | Detected | Detected    | Detected    | Detected    |
| 3521 | A_24_P355626  | ABCG4        | Hs.126378 | ATP-binding cassette, sub-family G (WHITE), member 4             | Homo sapiens ATP-binding cassette, sub-family G (WHITE), member 4 (ABCG4), transcript variant 1, mRNA [NM_022189]         | 2.00547 | up | 1.66026 | up | 59.73692    | 30.84316    | 33.37523    | 17.72617    | Detected | Detected    | Detected    | Detected    |
| 3522 | A_23_P105545  | VAMP1        | Hs.20021  | vesicle-associated membrane protein 1 (synaptobrevin 1)          | Homo sapiens vesicle-associated membrane protein 1 (synaptobrevin 1) (VAMP1), transcript variant 3, mRNA [NM_016830]      | 2.00386 | up | 2.06086 | up | 141.68227   | 73.21196    | 135.64742   | 58.04005    | Detected | Detected    | Detected    | Detected    |
| 3523 | A_33_P3219434 | MOSC2        | Hs.369042 | MOCO sulphurase C-terminal domain containing 2                   | Homo sapiens MOCO sulphurase C-terminal domain containing 2 (MOSC2), mRNA [NM_017898]                                     | 2.00331 | up | 1.93030 | up | 123.46970   | 63.81842    | 102.22758   | 46.69906    | Detected | Detected    | Detected    | Detected    |
| 3524 | A_24_P306594  |              | Hs.585415 |                                                                  | Uncharacterized protein C1orf167 [Source:UniProtKB/Swiss-Prot;Acc:Q55NV9] [ENST00000444493]                               | 2.00273 | up | 1.23448 | up | 36.06758    | 18.64783    | 27.14979    | 19.39312    | Detected | Detected    | Detected    | Detected    |
| 3525 | A_23_P19517   | ITPR3        | Hs.65758  | inositol 1,4,5-triphosphate receptor, type 3                     | Homo sapiens inositol 1,4,5-triphosphate receptor, type 3 (ITPR3), mRNA [NM_002224]                                       | 2.00256 | up | 1.78451 | up | 21735.91200 | 11238.94200 | 15804.57100 | 7809.61670  | Detected | Detected    | Detected    | Detected    |
| 3526 | A_24_P213715  | LOC90834     | Hs.679408 | hypothetical protein BC001742                                    | Homo sapiens hypothetical protein BC001742 (LOC90834), non-coding RNA [NR_026993]                                         | 2.00239 | up | 1.69628 | up | 13.79330    | 7.13267     | 9.43854     | 4.90651     | Detected | Compromised | Compromised | Compromised |
| 3527 | A_23_P330461  | TMC4         | Hs.355126 | transmembrane channel-like 4                                     | Homo sapiens transmembrane channel-like 4 (TMC4), transcript variant 2, mRNA [NM_144686]                                  | 2.00235 | up | 2.17469 | up | 114.83971   | 59.38625    | 103.53751   | 41.98234    | Detected | Detected    | Detected    | Detected    |
| 3528 | A_24_P243776  | ZNF277       | Hs.655904 | zinc finger protein 277                                          | Homo sapiens zinc finger protein 277 (ZNF277), mRNA [NM_021994]                                                           | 2.00222 | up | 2.00314 | up | 3181.04370  | 1645.09500  | 2050.99270  | 902.85700   | Detected | Detected    | Detected    | Detected    |
| 3529 | A_23_P112846  | MTHFD2L      | Hs.479954 | methylenetetrahydrofolate dehydrogenase (NADP+ dependent) 2-like | Homo sapiens methylenetetrahydrofolate dehydrogenase (NADP+ dependent) 2-like (MTHFD2L), mRNA [NM_001144978]              | 2.00194 | up | 1.78200 | up | 61.77427    | 31.95139    | 27.87302    | 13.79247    | Detected | Detected    | Detected    | Detected    |
| 3530 | A_24_P284523  | MAP3K10      | Hs.466743 | mitogen-activated protein kinase kinase kinase 10                | Homo sapiens mitogen-activated protein kinase kinase kinase 10 (MAP3K10), mRNA [NM_002446]                                | 2.00192 | up | 1.90942 | up | 1545.06160  | 799.15686   | 1350.56040  | 623.70310   | Detected | Detected    | Detected    | Detected    |
| 3531 | A_23_P163227  | CKMT1A       | Hs.425633 | creatine kinase, mitochondrial 1A                                | Homo sapiens creatine kinase, mitochondrial 1A (CKMT1A), nuclear gene encoding mitochondrial protein, mRNA [NM_001015001] | 2.00149 | up | 2.35081 | up | 27.39458    | 14.17243    | 22.70342    | 8.51607     | Detected | Compromised | Detected    | Compromised |
| 3532 | A_33_P3382856 | DCN          | Hs.156316 | decorin                                                          | Homo sapiens decorin (DCN), transcript variant E, mRNA [NM_133507]                                                        | 2.00069 | up | 1.73183 | up | 51018.80500 | 26404.82000 | 45476.50000 | 23155.08800 | Detected | Detected    | Detected    | Detected    |
| 3533 | A_33_P3409447 | AKAP11       | Hs.105105 | A kinase (PRKA) anchor protein 11                                | Homo sapiens A kinase (PRKA) anchor protein 11 (AKAP11), mRNA [NM_016248]                                                 | 2.00040 | up | 1.18668 | up | 131.70996   | 68.17641    | 77.73790    | 57.76494    | Detected | Detected    | Detected    | Detected    |
| 3534 | A_33_P3424112 | DHX40        | Hs.29403  | DEAH (Asp-Glu-Ala-His) box polypeptide 40                        | Homo sapiens DEAH (Asp-Glu-Ala-His) box polypeptide 40 (DHX40), transcript variant 1, mRNA [NM_024612]                    | 2.00038 | up | 2.35684 | up | 198.12599   | 102.55642   | 187.77078   | 70.25285    | Detected | Detected    | Detected    | Detected    |
| 3535 | A_33_P3577142 | LOC283861    | Hs.192155 | hypothetical locus LOC283861                                     | Homo sapiens cDNA FLJ40824 fis, clone TRACH201113 [AK098143]                                                              | 1.99928 | up | 2.09501 | up | 821.93005   | 425.69067   | 671.15760   | 282.49030   | Detected | Detected    | Detected    | Detected    |
| 3536 | A_33_P3254811 | C3orf70      | Hs.380048 | chromosome 3 open reading frame 70                               | Homo sapiens chromosome 3 open reading frame 70 (C3orf70), mRNA [NM_001025266]                                            | 1.99878 | up | 2.07665 | up | 430.29456   | 222.91217   | 348.92440   | 148.16124   | Detected | Detected    | Detected    | Detected    |

|      |               |              |           |                                                                  |                                                                                                                                                                                                          |         |    |         |    |             |            |             |            |             |             |          |             |
|------|---------------|--------------|-----------|------------------------------------------------------------------|----------------------------------------------------------------------------------------------------------------------------------------------------------------------------------------------------------|---------|----|---------|----|-------------|------------|-------------|------------|-------------|-------------|----------|-------------|
| 3537 | A_23_P413862  |              | Hs.690460 |                                                                  | Doublecortin domain-containing protein 5 [Source:UniProtKB/Swiss-Prot;Acc:Q6ZRR9] [ENST00000303697]                                                                                                      | 1.99728 | up | 6.70294 | up | 64.44672    | 33.41147   | 25.58884    | 3.36628    | Detected    | Detected    | Detected | Compromised |
| 3538 | A_23_P10374   | R3HDM2       | Hs.443673 | R3H domain containing 2                                          | Homo sapiens R3H domain containing 2 (R3HDM2), mRNA [NM_014925]                                                                                                                                          | 1.99665 | up | 2.01566 | up | 2265.61380  | 1174.94350 | 1553.63180  | 679.66675  | Detected    | Detected    | Detected | Detected    |
| 3539 | A_33_P3341716 | SP4          | Hs.88013  | Sp4 transcription factor                                         | Homo sapiens Sp4 transcription factor (SP4), mRNA [NM_003112]                                                                                                                                            | 1.99623 | up | 2.04646 | up | 496.16876   | 257.36658  | 345.20460   | 148.74400  | Detected    | Detected    | Detected | Detected    |
| 3540 | A_33_P3253401 | LOC100131774 | Hs.641595 | hypothetical LOC100131774                                        | PREDICTED: Homo sapiens hypothetical LOC100131774 (LOC100131774), mRNA [XM_001717693]                                                                                                                    | 1.99565 |    | 2.29853 |    | 137.46463   | 71.32478   | 111.34761   | 42.71650   | Detected    | Detected    | Detected | Detected    |
| 3541 | A_33_P3655775 | LOC284630    | Hs.502691 | hypothetical protein LOC284630                                   | Homo sapiens cDNA FLJ39065 fis. clone NT2RP7014721 [AK096384]                                                                                                                                            | 1.99532 |    | 2.55590 | up | 24.11570    | 12.51470   | 28.87646    | 9.96245    | Detected    | Compromised | Detected | Compromised |
| 3542 | A_24_P361457  | FLJ35220     | Hs.389678 | hypothetical protein FLJ35220                                    | Homo sapiens hypothetical protein FLJ35220 (FLJ35220), transcript variant 1, mRNA [NM_173627]                                                                                                            | 1.99498 | up | 3.08924 | up | 180.23248   | 93.54668   | 145.01985   | 41.39437   | Detected    | Detected    | Detected | Detected    |
| 3543 | A_23_P122615  | SFRS18       | Hs.520287 | splicing factor, arginine/serine-rich 18                         | Homo sapiens splicing factor, arginine/serine-rich 18 (SFRS18), transcript variant 1, mRNA [NM_032870]                                                                                                   | 1.99450 | up | 2.02988 | up | 1306.21810  | 678.13330  | 754.11930   | 327.59340  | Detected    | Detected    | Detected | Detected    |
| 3544 | A_33_P3301514 | NRCAM        | Hs.21422  | neuronal cell adhesion molecule                                  | Homo sapiens neuronal cell adhesion molecule (NRCAM), transcript variant 1, mRNA [NM_001037132]                                                                                                          | 1.99449 | up | 2.12592 | up | 127.80258   | 66.35004   | 137.40176   | 56.99162   | Detected    | Detected    | Detected | Detected    |
| 3545 | A_24_P100761  | BCAS3        | Hs.655028 | breast carcinoma amplified sequence 3                            | Homo sapiens breast carcinoma amplified sequence 3 (BCAS3), transcript variant 2, mRNA [NM_017679]                                                                                                       | 1.99392 | up | 2.10324 | up | 212.86700   | 110.54360  | 218.96994   | 91.80380   | Detected    | Detected    | Detected | Detected    |
| 3546 | A_33_P3237220 | FBXO24       | Hs.283764 | F-box protein 24                                                 | Homo sapiens F-box protein 24 (FBXO24), transcript variant 1, mRNA [NM_033506]                                                                                                                           | 1.99378 | up | 2.40426 | up | 651.24493   | 338.22113  | 404.04385   | 148.18774  | Detected    | Detected    | Detected | Detected    |
| 3547 | A_33_P3218013 |              |           |                                                                  |                                                                                                                                                                                                          | 1.99297 | up | 5.37157 | up | 28.58356    | 14.85074   | 25.09220    | 4.11910    | Detected    | Detected    | Detected | Compromised |
| 3548 | A_23_P60499   | ZNF462       | Hs.370379 | zinc finger protein 462                                          | Homo sapiens zinc finger protein 462 (ZNF462), mRNA [NM_021224]                                                                                                                                          | 1.99261 | up | 2.00142 | up | 1093.59800  | 568.28796  | 944.47480   | 416.11984  | Detected    | Detected    | Detected | Detected    |
| 3549 | A_23_P20392   | PSD3         | Hs.434255 | pleckstrin and Sec7 domain containing 3                          | Homo sapiens pleckstrin and Sec7 domain containing 3 (PSD3), transcript variant 1, mRNA [NM_015310]                                                                                                      | 1.99226 | up | 2.48627 | up | 2970.04900  | 1543.65380 | 1829.37520  | 648.81415  | Detected    | Detected    | Detected | Detected    |
| 3550 | A_33_P3417260 | C9orf95      | Hs.494186 | chromosome 9 open reading frame 95                               | Homo sapiens chromosome 9 open reading frame 95 (C9orf95), transcript variant 1, mRNA [NM_017881]                                                                                                        | 1.99198 |    | 2.02481 | up | 1337.90980  | 695.46606  | 860.40200   | 374.69897  | Detected    | Detected    | Detected | Detected    |
| 3551 | A_23_P72503   | KLHL2        | Hs.388668 | kelch-like 2, Mayven (Drosophila)                                | Homo sapiens kelch-like 2, Mayven (Drosophila) (KLHL2), transcript variant 1, mRNA [NM_007246]                                                                                                           | 1.99062 | up | 2.22785 | up | 860.52313   | 447.61667  | 676.17850   | 267.63327  | Detected    | Detected    | Detected | Detected    |
| 3552 | A_33_P3254141 | LOC285696    |           | hypothetical LOC285696                                           | Homo sapiens hypothetical LOC285696 (LOC285696), non-coding RNA [NR_027253]                                                                                                                              | 1.98958 | up | 4.34661 | up | 6.31693     | 3.28759    | 13.74076    | 2.78757    | Compromised | Compromised | Detected | Compromised |
| 3553 | A_23_P4160    | NBR2         |           | neighbor of BRCA1 gene 2 (non-protein coding)                    | Homo sapiens neighbor of BRCA1 gene 2 (non-protein coding) (NBR2), non-coding RNA [NR_003108]                                                                                                            | 1.98877 | up | 2.23731 | up | 66.20338    | 34.46907   | 55.56208    | 21.89867   | Detected    | Detected    | Detected | Detected    |
| 3554 | A_23_P375147  | RC3H2        | Hs.709775 | ring finger and CCCH-type zinc finger domains 2                  | Ring finger and CCCH-type zinc finger domain-containing protein 2 (Membrane-associated nucleic acid-binding protein)(RING finger protein 164) [Source:UniProtKB/Swiss-Prot;Acc:Q9HBD1] [ENST00000373670] | 1.98875 | up | 2.11761 | up | 2160.22700  | 1124.74230 | 1513.71020  | 630.32227  | Detected    | Detected    | Detected | Detected    |
| 3555 | A_33_P3304107 | KLHL28       | Hs.550906 | kelch-like 28 (Drosophila)                                       | Homo sapiens kelch-like 28 (Drosophila) (KLHL28), mRNA [NM_017658]                                                                                                                                       | 1.98824 | up | 2.10363 | up | 1203.87110  | 626.96580  | 531.03940   | 222.59912  | Detected    | Detected    | Detected | Detected    |
| 3556 | A_23_P418199  | LOC730098    | Hs.459590 | similar to chemokine (C-C motif) ligand 27                       | PREDICTED: Homo sapiens similar to chemokine (C-C motif) ligand 27 (LOC730098), miscRNA [XR_041278]                                                                                                      | 1.98730 |    | 2.00025 |    | 1388.05730  | 723.22970  | 1438.59350  | 634.19116  | Detected    | Detected    | Detected | Detected    |
| 3557 | A_33_P3677298 | LOC152286    | Hs.561180 | hypothetical protein LOC152286                                   | Homo sapiens mRNA: cDNA DKFZb434E036 (from clone DKFZb434E036) [AL117431]                                                                                                                                | 1.98670 |    | 3.07007 | up | 44.36316    | 23.12185   | 16.97459    | 4.87547    | Detected    | Detected    | Detected | Compromised |
| 3558 | A_23_P208937  | TLE6         | Hs.334507 | transducin-like enhancer of split 6 (E(sp1) homolog, Drosophila) | Homo sapiens transducin-like enhancer of split 6 (E(sp1) homolog, Drosophila) (TLE6), transcript variant 2, mRNA [NM_024760]                                                                             | 1.98667 | up | 2.56986 | up | 71.28606    | 37.15451   | 74.84522    | 25.68150   | Detected    | Detected    | Detected | Detected    |
| 3559 | A_33_P3357087 | MPV17        | Hs.75659  | MpV17 mitochondrial inner membrane protein                       | Homo sapiens MpV17 mitochondrial inner membrane protein (MPV17), nuclear gene encoding mitochondrial protein, mRNA [NM_002437]                                                                           | 1.98594 | up | 2.03899 | up | 16365.35000 | 8532.82300 | 13228.92500 | 5721.03120 | Detected    | Detected    | Detected | Detected    |
| 3560 | A_23_P331908  |              | Hs.178715 |                                                                  | cDNA FLJ40559 fis. clone THYMJ2902910 [Source:UniProtKB/TrEMBL;Acc:Q8N1K6] [ENST00000399269]                                                                                                             | 1.98563 |    | 2.16863 | up | 508.66530   | 265.25730  | 419.05940   | 170.39433  | Detected    | Detected    | Detected | Detected    |
| 3561 | A_23_P314642  | ZNF280C      | Hs.308418 | zinc finger protein 280C                                         | Homo sapiens zinc finger protein 280C (ZNF280C), mRNA [NM_017666]                                                                                                                                        | 1.98387 | up | 2.01974 | up | 399.97113   | 208.76053  | 331.79590   | 144.85751  | Detected    | Detected    | Detected | Detected    |
| 3562 | A_24_P941787  | PRPF4B       | Hs.159014 | PRP4 pre-mRNA processing factor 4 homolog B (yeast)              | Homo sapiens PRP4 pre-mRNA processing factor 4 homolog B (yeast) (PRPF4B), mRNA [NM_003913]                                                                                                              | 1.98125 | up | 2.18792 | up | 4272.97900  | 2233.18850 | 2793.17820  | 1125.72420 | Detected    | Detected    | Detected | Detected    |
| 3563 | A_23_P20045   | PEX1         | Hs.164682 | peroxisomal biogenesis factor 1                                  | Homo sapiens peroxisomal biogenesis factor 1 (PEX1), mRNA [NM_000466]                                                                                                                                    | 1.98061 | up | 2.03292 | up | 402.75510   | 210.55946  | 491.49774   | 213.18997  | Detected    | Detected    | Detected | Detected    |
| 3564 | A_33_P3234197 | TRIM45       | Hs.301526 | tripartite motif-containing 45                                   | Homo sapiens tripartite motif-containing 45 (TRIM45), transcript variant 1, mRNA [NM_025188]                                                                                                             | 1.98037 | up | 2.15228 | up | 875.27930   | 457.65106  | 601.40620   | 246.39693  | Detected    | Detected    | Detected | Detected    |
| 3565 | A_23_P378427  | STARD6       | Hs.438779 | StAR-related lipid transfer (START) domain containing 6          | Homo sapiens StAR-related lipid transfer (START) domain containing 6 (STARD6), mRNA [NM_139171]                                                                                                          | 1.98029 | up | 2.56222 | up | 41.55079    | 21.72619   | 34.93115    | 12.02158   | Detected    | Detected    | Detected | Compromised |



|      |               |            |           |                                                                                  |                                                                                                                                            |         |    |         |    |             |             |             |             |          |             |             |             |
|------|---------------|------------|-----------|----------------------------------------------------------------------------------|--------------------------------------------------------------------------------------------------------------------------------------------|---------|----|---------|----|-------------|-------------|-------------|-------------|----------|-------------|-------------|-------------|
| 3566 | A_33_P3405168 | MMAA       | Hs.452864 | methylmalonic aciduria (cobalamin deficiency) cblA type                          | Homo sapiens methylmalonic aciduria (cobalamin deficiency) cblA type (MMAA), nuclear gene encoding mitochondrial protein, mRNA [NM_172250] | 1.97876 | up | 2.44105 | up | 256.49360   | 134.21950   | 178.96904   | 64.64983    | Detected | Detected    | Detected    | Detected    |
| 3567 | A_33_P3228325 | SP100      | Hs.369056 | SP100 nuclear antigen                                                            | Homo sapiens SP100 nuclear antigen (SP100), transcript variant 1, mRNA [NM_001080391]                                                      | 1.97821 | up | 2.20154 | up | 3722.38600  | 1948.42020  | 2244.82500  | 899.12860   | Detected | Detected    | Detected    | Detected    |
| 3568 | A_33_P3317880 | ZNF252     | Hs.330602 | zinc finger protein 252                                                          | Homo sapiens zinc finger protein 252 (ZNF252), non-coding RNA [NR_023392]                                                                  | 1.97617 | up | 2.07626 | up | 2745.71100  | 1438.67910  | 2547.24000  | 1081.81500  | Detected | Detected    | Detected    | Detected    |
| 3569 | A_33_P3298043 | ABCC6      | Hs.442182 | ATP-binding cassette, sub-family C (CFTR/MRP), member 6                          | Homo sapiens ATP-binding cassette, sub-family C (CFTR/MRP), member 6 (ABCC6), transcript variant 2, mRNA [NM_001079528]                    | 1.97577 | up | 2.45721 | up | 93.21674    | 48.85289    | 92.33732    | 33.13603    | Detected | Detected    | Detected    | Detected    |
| 3570 | A_33_P3343976 | NORNA00171 | Hs.653168 | non-protein coding RNA 171                                                       | Homo sapiens non-protein coding RNA 171 (NORNA00171), non-coding RNA [NR_026751]                                                           | 1.97480 | up | 3.35481 | up | 18.99159    | 9.95797     | 17.08035    | 4.48946     | Detected | Compromised | Detected    | Compromised |
| 3571 | A_33_P3297907 | FGF22      | Hs.248087 | fibroblast growth factor 22                                                      | Homo sapiens fibroblast growth factor 22 (FGF22), mRNA [NM_020637]                                                                         | 1.97411 | up | 2.52815 | up | 52.45741    | 27.51495    | 71.89887    | 25.07756    | Detected | Detected    | Detected    | Detected    |
| 3572 | A_33_P3232458 | CLIP4      | Hs.122927 | CAP-GLY domain containing linker protein family, member 4                        | Homo sapiens CAP-GLY domain containing linker protein family, member 4 (CLIP4), mRNA [NM_024692]                                           | 1.97388 | up | 2.26502 | up | 440.60043   | 231.13051   | 341.31183   | 132.87527   | Detected | Detected    | Detected    | Detected    |
| 3573 | A_23_P53530   | MTERFD3    | Hs.5009   | MTERF domain containing 3                                                        | Homo sapiens MTERF domain containing 3 (MTERFD3), transcript variant 1, mRNA [NM_001033050]                                                | 1.97388 | up | 2.13176 | up | 292.31818   | 153.34459   | 257.52298   | 106.52303   | Detected | Detected    | Detected    | Detected    |
| 3574 | A_24_P335901  | ZNF266     | Hs.656185 | zinc finger protein 266                                                          | Homo sapiens zinc finger protein 266 (ZNF266), mRNA [NM_006631]                                                                            | 1.97178 | up | 2.04287 | up | 1748.79130  | 918.36150   | 1248.77160  | 539.02356   | Detected | Detected    | Detected    | Detected    |
| 3575 | A_24_P185604  | NDRG3      | Hs.437338 | NDRG family member 3                                                             | Homo sapiens NDRG family member 3 (NDRG3), transcript variant 1, mRNA [NM_032013]                                                          | 1.97055 | up | 2.01219 | up | 1279.07890  | 672.11300   | 800.05970   | 350.60504   | Detected | Detected    | Detected    | Detected    |
| 3576 | A_32_P209208  | CAPS2      | Hs.407154 | calcyphosine 2                                                                   | Homo sapiens calcyphosine 2 (CAPS2), mRNA [NM_032606]                                                                                      | 1.97027 | up | 2.14640 | up | 161.32141   | 84.78112    | 131.10764   | 53.86200    | Detected | Detected    | Detected    | Detected    |
| 3577 | A_23_P47885   | LRIG3      | Hs.253736 | leucine-rich repeats and immunoglobulin-like domains 3                           | Homo sapiens leucine-rich repeats and immunoglobulin-like domains 3 (LRIG3), transcript variant 2, mRNA [NM_153377]                        | 1.97023 | up | 2.01970 | up | 977.49744   | 513.72730   | 681.83890   | 297.68716   | Detected | Detected    | Detected    | Detected    |
| 3578 | A_33_P3245606 | BHLHA9     |           | basic helix-loop-helix family, member a9                                         | Homo sapiens basic helix-loop-helix family, member a9 (BHLHA9), mRNA [NM_001164405]                                                        | 1.96997 | up | 3.46437 | up | 17.86018    | 9.38772     | 11.63444    | 2.96133     | Detected | Compromised | Compromised | Compromised |
| 3579 | A_23_P202939  | APLP2      | Hs.370247 | amyloid beta (A4) precursor-like protein 2                                       | Homo sapiens amyloid beta (A4) precursor-like protein 2 (APLP2), transcript variant 1, mRNA [NM_0011642]                                   | 1.96947 | up | 2.06267 | up | 54390.52300 | 28596.09800 | 40648.16400 | 17377.06800 | Detected | Detected    | Detected    | Detected    |
| 3580 | A_23_P9289    | RFX3       | Hs.136829 | regulatory factor X, 3 (influences HLA class II expression)                      | Homo sapiens regulatory factor X, 3 (influences HLA class II expression) (RFX3), transcript variant 2, mRNA [NM_134428]                    | 1.96680 | up | 2.09510 | up | 111.02668   | 58.39277    | 63.63274    | 35.19957    | Detected | Detected    | Detected    | Detected    |
| 3581 | A_23_P111402  | RSPO3      | Hs.135254 | R-spondin 3 homolog (Xenopus laevis)                                             | Homo sapiens R-spondin 3 homolog (Xenopus laevis) (RSPO3), mRNA [NM_032784]                                                                | 1.96794 | up | 2.01285 | up | 69.72252    | 36.68558    | 37.23166    | 16.31046    | Detected | Detected    | Detected    | Detected    |
| 3582 | A_33_P3316379 |            |           |                                                                                  |                                                                                                                                            | 1.96467 | up | 2.03232 | up | 20908.54100 | 11019.62700 | 8496.86100  | 3686.64330  | Detected | Detected    | Detected    | Detected    |
| 3583 | A_24_P555510  | PCM1       | Hs.491148 | pericentriolar material 1                                                        | Homo sapiens pericentriolar material 1 (PCM1), mRNA [NM_006197]                                                                            | 1.96380 | up | 2.00912 | up | 1882.22880  | 992.45105   | 1115.03580  | 489.38270   | Detected | Detected    | Detected    | Detected    |
| 3584 | A_24_P289383  | CHD7       | Hs.20395  | chromodomain helicase DNA binding protein 7                                      | Homo sapiens chromodomain helicase DNA binding protein 7 (CHD7), mRNA [NM_017780]                                                          | 1.96322 | up | 2.39438 | up | 202.86945   | 106.89371   | 127.86469   | 47.08938    | Detected | Detected    | Detected    | Detected    |
| 3585 | A_33_P3299025 | LOC389834  | Hs.720653 | ankyrin repeat domain 57 pseudogene                                              | Homo sapiens ankyrin repeat domain 57 pseudogene (LOC389834), non-coding RNA [NR_027420]                                                   | 1.96262 | up | 3.22659 | up | 16.51271    | 8.71194     | 11.04182    | 3.01760     | Detected | Compromised | Compromised | Compromised |
| 3586 | A_33_P3360087 | BBS9       | Hs.372360 | Bardet-Biedl syndrome 9                                                          | Homo sapiens Bardet-Biedl syndrome 9 (BBS9), transcript variant 1, mRNA [NM_014451]                                                        | 1.96088 | up | 2.79659 | up | 66.83823    | 35.29454    | 59.93847    | 18.89915    | Detected | Detected    | Detected    | Detected    |
| 3587 | A_33_P3399788 | SERPINA3   | Hs.534293 | serpin peptidase inhibitor, clade A (alpha-1 antitrypsin, antitrypsin), member 3 | Homo sapiens serpin peptidase inhibitor, clade A (alpha-1 antitrypsin, antitrypsin), member 3 (SERPINA3), mRNA [NM_001085]                 | 1.96028 | up | 2.19322 | up | 468.69238   | 247.57309   | 688.07960   | 276.64478   | Detected | Detected    | Detected    | Detected    |
| 3588 | A_33_P3424867 |            |           |                                                                                  |                                                                                                                                            | 1.96003 | up | 2.02554 | up | 495.41367   | 261.72086   | 274.30426   | 119.41446   | Detected | Detected    | Detected    | Detected    |
| 3589 | A_24_P191833  | SFRS12     | Hs.519347 | splicing factor, arginine/serine-rich 12                                         | Homo sapiens splicing factor, arginine/serine-rich 12 (SFRS12), transcript variant 2, mRNA [NM_139168]                                     | 1.95681 | up | 2.17618 | up | 2209.34000  | 1169.08870  | 1417.37290  | 574.32166   | Detected | Detected    | Detected    | Detected    |
| 3590 | A_23_P105923  | DIO3       | Hs.49322  | deiodinase, iodothyronine, type III                                              | Homo sapiens deiodinase, iodothyronine, type III (DIO3), mRNA [NM_001362]                                                                  | 1.95624 | up | 4.94579 | up | 34.90253    | 18.47426    | 23.13339    | 4.12448     | Detected | Detected    | Detected    | Compromised |
| 3591 | A_23_P348257  | NUAK1      | Hs.524692 | NUAK family, SNF1-like kinase, 1                                                 | Homo sapiens NUAK family, SNF1-like kinase, 1 (NUAK1), mRNA [NM_014840]                                                                    | 1.95577 | up | 2.04984 | up | 3859.91750  | 2043.58860  | 2831.93260  | 1218.22630  | Detected | Detected    | Detected    | Detected    |
| 3592 | A_33_P3862375 | USP45      | Hs.143410 | ubiquitin specific peptidase 45                                                  | Homo sapiens ubiquitin specific peptidase 45 (USP45), mRNA [NM_001080481]                                                                  | 1.95320 | up | 2.10659 | up | 487.17075   | 258.26575   | 367.82280   | 153.96545   | Detected | Detected    | Detected    | Detected    |
| 3593 | A_24_P325176  | KIAA1109   | Hs.408142 | KIAA1109                                                                         | Homo sapiens KIAA1109 (KIAA1109), mRNA [NM_015312]                                                                                         | 1.95286 | up | 2.15094 | up | 974.44650   | 516.67834   | 564.38150   | 231.37180   | Detected | Detected    | Detected    | Detected    |
| 3594 | A_24_P74064   | ZFP161     | Hs.592340 | zinc finger protein 161 homolog (mouse)                                          | Homo sapiens zinc finger protein 161 homolog (mouse) (ZFP161), transcript variant 2, mRNA [NM_003409]                                      | 1.95242 | up | 2.04635 | up | 742.17470   | 393.61066   | 549.32740   | 236.70975   | Detected | Detected    | Detected    | Detected    |
| 3595 | A_23_P88909   | SYNGR3     | Hs.435277 | synaptogyrin 3                                                                   | Homo sapiens synaptogyrin 3 (SYNGR3), mRNA [NM_004209]                                                                                     | 1.95205 | up | 2.03137 | up | 172.61182   | 91.56157    | 183.05075   | 79.45996    | Detected | Detected    | Detected    | Detected    |
| 3596 | A_33_P3352822 | ZNF547     | Hs.446620 | zinc finger protein 547                                                          | Homo sapiens zinc finger protein 547 (ZNF547), mRNA [NM_173631]                                                                            | 1.95059 | up | 2.35983 | up | 246.33936   | 130.76773   | 153.37865   | 57.31263    | Detected | Detected    | Detected    | Detected    |

|      |               |              |           |                                                  |                                                                                                                                                         |         |    |         |    |             |             |             |             |             |             |             |             |
|------|---------------|--------------|-----------|--------------------------------------------------|---------------------------------------------------------------------------------------------------------------------------------------------------------|---------|----|---------|----|-------------|-------------|-------------|-------------|-------------|-------------|-------------|-------------|
| 3597 | A_33_P3389852 | BCAS3        | Hs.655028 | breast carcinoma amplified sequence 3            | Homo sapiens breast carcinoma amplified sequence 3 (BCAS3), transcript variant 2, mRNA [NM_017679]                                                      | 1.94981 | up | 2.29034 | up | 89.49251    | 47.52570    | 83.55839    | 32.17040    | Detected    | Detected    | Detected    | Detected    |
| 3598 | A_23_P33914   | NUP62CL      | Hs.163629 | nucleoporin 62kDa C-terminal like                | Homo sapiens nucleoporin 62kDa C-terminal like (NUP62CL), mRNA [NM_017681]                                                                              | 1.94964 | up | 2.20132 | up | 13.44632    | 7.14138     | 6.70081     | 2.68417     | Detected    | Compromised | Compromised | Compromised |
| 3599 | A_23_P142075  | ACP5         | Hs.1211   | acid phosphatase 5, tartrate resistant           | Homo sapiens acid phosphatase 5, tartrate resistant (ACP5), transcript variant 4, mRNA [NM_001611]                                                      | 1.94931 | up | 2.08082 | up | 2288.90580  | 1215.85300  | 2310.70750  | 979.21124   | Detected    | Detected    | Detected    | Detected    |
| 3600 | A_23_P149613  | FMO1         | Hs.1424   | flavin containing monooxygenase 1                | Homo sapiens flavin containing monooxygenase 1 (FMO1), mRNA [NM_002021]                                                                                 | 1.94919 | up | 5.07418 | up | 191.70462   | 101.83814   | 120.43762   | 20.92966    | Detected    | Detected    | Detected    | Detected    |
| 3601 | A_32_P114215  | COMM6        | Hs.508266 | COMM domain containing 6                         | Homo sapiens COMM domain containing 6 (COMM6), transcript variant 1, mRNA [NM_203497]                                                                   | 1.94844 | up | 2.01250 | up | 35378.78000 | 18801.35700 | 31208.02300 | 13674.04000 | Detected    | Detected    | Detected    | Detected    |
| 3602 | A_33_P3288074 | LOC730202    | Hs.647565 | hypothetical protein LOC730202                   | PREDICTED: Homo sapiens hypothetical protein LOC730202 (LOC730202), miscRNA [XR_041804]                                                                 | 1.94813 | up | 2.36779 | up | 48.59230    | 25.82748    | 41.03780    | 15.28294    | Detected    | Detected    | Detected    | Detected    |
| 3603 | A_33_P3379406 |              |           |                                                  | Protein GREB1 (Gene regulated in breast cancer 1 protein) [Source:UniProtKB/Swiss-Prot;Acc:Q4ZG55] [ENST00000389825]                                    | 1.94772 | up | 3.15305 | up | 44.66525    | 23.74519    | 30.83545    | 8.62353     | Detected    | Detected    | Detected    | Compromised |
| 3604 | A_24_P267522  | ZNF585A      | Hs.390568 | zinc finger protein 585A                         | Homo sapiens zinc finger protein 585A (ZNF585A), transcript variant 1, mRNA [NM_152655]                                                                 | 1.94665 | up | 2.65558 | up | 19.30548    | 10.26894    | 17.28775    | 5.74043     | Detected    | Compromised | Detected    | Compromised |
| 3605 | A_24_P945194  | PDCC6IP      | Hs.475896 | programmed cell death 6 interacting protein      | Homo sapiens programmed cell death 6 interacting protein (PDCC6IP), transcript variant 1, mRNA [NM_013374]                                              | 1.94354 | up | 2.11896 | up | 869.12340   | 463.04330   | 454.36090   | 189.07930   | Detected    | Detected    | Detected    | Detected    |
| 3606 | A_33_P3388958 | SNX32        | Hs.591950 | sorting nexin 32                                 | Homo sapiens sorting nexin 32 (SNX32), mRNA [NM_152760]                                                                                                 | 1.94323 | up | 3.13674 | up | 402.90420   | 214.68896   | 303.47098   | 85.31072    | Detected    | Detected    | Detected    | Detected    |
| 3607 | A_24_P236235  | FLRT2        | Hs.533710 | fibronectin leucine rich transmembrane protein 2 | Homo sapiens fibronectin leucine rich transmembrane protein 2 (FLRT2), mRNA [NM_013231]                                                                 | 1.94289 | up | 2.00799 | up | 454.28943   | 242.11241   | 260.16240   | 114.24820   | Detected    | Detected    | Detected    | Detected    |
| 3608 | A_32_P475513  | MYO15B       | Hs.390817 | myosin XVb pseudogene                            | Homo sapiens myosin XVb pseudogene (MYO15B), non-coding RNA [NR_003597]                                                                                 | 1.94167 | up | 2.04561 | up | 20.01581    | 10.67407    | 11.82322    | 5.09658     | Detected    | Compromised | Compromised | Compromised |
| 3609 | A_24_P125283  | HDAC5        | Hs.438782 | histone deacetylase 5                            | Homo sapiens histone deacetylase 5 (HDAC5), transcript variant 3, mRNA [NM_001015053]                                                                   | 1.94125 | up | 2.59723 | up | 2382.78860  | 1270.97830  | 1894.72970  | 643.28290   | Detected    | Detected    | Detected    | Detected    |
| 3610 | A_33_P3239102 |              |           |                                                  |                                                                                                                                                         | 1.94053 | up | 2.63975 | up | 7676.01200  | 4095.89720  | 1228.99290  | 410.53683   | Detected    | Detected    | Detected    | Detected    |
| 3611 | A_33_P3338417 | WARS2        | Hs.523506 | tryptophanyl tRNA synthetase 2, mitochondrial    | Homo sapiens tryptophanyl tRNA synthetase 2, mitochondrial (WARS2), nuclear gene encoding mitochondrial protein, transcript variant 2, mRNA [NM_201263] | 1.93926 | up | 2.00955 | up | 1954.38230  | 1043.53530  | 1138.79980  | 499.70520   | Detected    | Detected    | Detected    | Detected    |
| 3612 | A_23_P431569  |              | Hs.655804 |                                                  | LOC100049716 protein Fragment [Source:UniProtKB/TrEMBL;Acc:Q8N5G3] [ENST00000318291]                                                                    | 1.93842 | up | 2.11263 | up | 402.96573   | 215.25511   | 256.92444   | 107.23760   | Detected    | Detected    | Detected    | Detected    |
| 3613 | A_32_P355396  | TECPR2       | Hs.195667 | tectonin beta-propeller repeat containing 2      | Homo sapiens tectonin beta-propeller repeat containing 2 (TECPR2), mRNA [NM_014844]                                                                     | 1.93799 | up | 2.12611 | up | 2044.25210  | 1092.23400  | 1340.06680  | 555.78470   | Detected    | Detected    | Detected    | Detected    |
| 3614 | A_24_P359322  | C21orf49     | Hs.54725  | chromosome 21 open reading frame 49              | Homo sapiens chromosome 21 open reading frame 49 (C21orf49), transcript variant 1, non-coding RNA [NR_024622]                                           | 1.93556 | up | 3.53055 | up | 11.80604    | 6.31582     | 23.10554    | 5.77085     | Compromised | Compromised | Detected    | Compromised |
| 3615 | A_33_P3216083 | SHPRH        | Hs.124537 | SNF2 histone linker PHD RING helicase            | Homo sapiens SNF2 histone linker PHD RING helicase (SHPRH), transcript variant 2, mRNA [NM_173082]                                                      | 1.93408 | up | 2.07296 | up | 45.15646    | 24.17563    | 21.03370    | 8.94726     | Detected    | Detected    | Detected    | Compromised |
| 3616 | A_24_P388940  | C6orf162     | Hs.70769  | chromosome 6 open reading frame 162              | Homo sapiens chromosome 6 open reading frame 162 (C6orf162), transcript variant 1, mRNA [NM_001042493]                                                  | 1.93405 | up | 2.25417 | up | 276.49905   | 148.03285   | 284.25803   | 111.19660   | Detected    | Detected    | Detected    | Detected    |
| 3617 | A_23_P102950  | RSPH1        | Hs.661069 | radial spoke head 1 homolog (Chlamydomonas)      | Homo sapiens radial spoke head 1 homolog (Chlamydomonas) (RSPH1), mRNA [NM_080860]                                                                      | 1.93178 | up | 5.58034 | up | 39.55026    | 21.19944    | 22.31084    | 3.52550     | Detected    | Detected    | Detected    | Compromised |
| 3618 | A_23_P319013  | ZNF383       | Hs.590975 | zinc finger protein 383                          | Homo sapiens zinc finger protein 383 (ZNF383), mRNA [NM_152604]                                                                                         | 1.93174 | up | 2.15646 | up | 438.21832   | 234.89507   | 336.61990   | 137.64636   | Detected    | Detected    | Detected    | Detected    |
| 3619 | A_33_P3270793 | FAM84A       | Hs.260855 | family with sequence similarity 84, member A     | Homo sapiens family with sequence similarity 84, member A (FAM84A), mRNA [NM_145175]                                                                    | 1.93117 | up | 2.61595 | up | 38.46104    | 20.62212    | 51.00356    | 17.19239    | Detected    | Detected    | Detected    | Detected    |
| 3620 | A_33_P3415097 | CLCN4        | Hs.495674 | chloride channel 4                               | Homo sapiens chloride channel 4 (CLCN4), mRNA [NM_001830]                                                                                               | 1.92935 | up | 2.21027 | up | 578.52527   | 310.48780   | 478.53134   | 190.91081   | Detected    | Detected    | Detected    | Detected    |
| 3621 | A_23_P204782  | MDM1         | Hs.655702 | Mdm1 nuclear protein homolog (mouse)             | Homo sapiens Mdm1 nuclear protein homolog (mouse) (MDM1), transcript variant 2, mRNA [NM_020128]                                                        | 1.92874 | up | 2.01316 | up | 334.00262   | 179.31192   | 280.71756   | 122.95801   | Detected    | Detected    | Detected    | Detected    |
| 3622 | A_24_P35169   | GATAD1       | Hs.21145  | GATA zinc finger domain containing 1             | Homo sapiens GATA zinc finger domain containing 1 (GATAD1), mRNA [NM_021167]                                                                            | 1.92833 | up | 2.00450 | up | 1446.44890  | 776.70350   | 1204.25480  | 529.75800   | Detected    | Detected    | Detected    | Detected    |
| 3623 | A_23_P433132  | KRTCAP3      | Hs.595909 | keratinocyte associated protein 3                | Homo sapiens keratinocyte associated protein 3 (KRTCAP3), mRNA [NM_179853]                                                                              | 1.92637 | up | 2.06529 | up | 45.30082    | 24.35008    | 33.63108    | 14.35907    | Detected    | Detected    | Detected    | Compromised |
| 3624 | A_24_P367432  | LOC100133862 |           | similar to HCG1773549                            | Rheumatoid factor RF-IP9 Fragment [Source:UniProtKB/TrEMBL;Acc:A2J1M2] [ENST00000390633]                                                                | 1.92506 | up | 2.79223 | up | 5.77586     | 3.10674     | 26.13817    | 8.25449     | Compromised | Compromised | Detected    | Compromised |
| 3625 | A_33_P3294598 | PCDH10       | Hs.192859 | protocadherin 10                                 | Homo sapiens protocadherin 10 (PCDH10), transcript variant 2, mRNA [NM_020815]                                                                          | 1.92315 | up | 3.61506 | up | 8.52342     | 4.58916     | 12.21554    | 2.97963     | Compromised | Compromised | Detected    | Compromised |
| 3626 | A_24_P845072  | FAM91A1      | Hs.459174 | family with sequence similarity 91, member A1    | Homo sapiens family with sequence similarity 91, member A1 (FAM91A1), mRNA [NM_144963]                                                                  | 1.92183 | up | 2.24668 | up | 966.61190   | 520.80035   | 676.36316   | 265.46286   | Detected    | Detected    | Detected    | Detected    |

|      |               |              |           |                                                                    |                                                                                                             |         |    |         |    |             |            |             |            |          |             |             |             |
|------|---------------|--------------|-----------|--------------------------------------------------------------------|-------------------------------------------------------------------------------------------------------------|---------|----|---------|----|-------------|------------|-------------|------------|----------|-------------|-------------|-------------|
| 3627 | A_24_P196534  | PKNOX1       | Hs.431043 | PBX/knotted 1 homeobox 1                                           | Homo sapiens PBX/knotted 1 homeobox 1 (PKNOX1), mRNA [NM_004571]                                            | 1.92100 | up | 2.28377 | up | 1917.38000  | 1033.50900 | 1360.55700  | 525.32640  | Detected | Detected    | Detected    | Detected    |
| 3628 | A_23_P23279   | RCSDB1       | Hs.493867 | RCSDB domain containing 1                                          | Homo sapiens RCSDB domain containing 1 (RCSDB1), mRNA [NM_052862]                                           | 1.91990 | up | 2.43460 | up | 69.52772    | 37.49831   | 62.32583    | 22.57387   | Detected | Detected    | Detected    | Detected    |
| 3629 | A_32_P358115  | LOC284648    | Hs.253475 | hypothetical protein LOC284648                                     | PREDICTED: Homo sapiens hypothetical protein LOC284648 (LOC284648), mRNA [XM_001715964]                     | 1.91952 | up | 2.58295 | up | 14.08319    | 7.59700    | 8.64931     | 2.95278    | Detected | Compromised | Compromised | Compromised |
| 3630 | A_24_P116378  | GCOM1        | Hs.437256 | GRINL1A complex locus                                              | Homo sapiens GRINL1A complex locus (GCOM1), transcript variant 1, mRNA [NM_001018090]                       | 1.91887 | up | 2.01558 | up | 2131.66920  | 1150.28760 | 1187.85400  | 519.67065  | Detected | Detected    | Detected    | Detected    |
| 3631 | A_24_P416159  | RBL2         | Hs.513609 | retinoblastoma-like 2 (p130)                                       | Homo sapiens retinoblastoma-like 2 (p130) (RBL2), mRNA [NM_005611]                                          | 1.91696 | up | 2.14528 | up | 1082.56750  | 584.75775  | 802.85065   | 330.00247  | Detected | Detected    | Detected    | Detected    |
| 3632 | A_33_P3311439 | GCH1         | Hs.86724  | GTP cyclohydrolase 1                                               | Homo sapiens GTP cyclohydrolase 1 (GCH1), transcript variant 4, mRNA [NM_001024071]                         | 1.91407 | up | 3.46100 | up | 63.65474    | 34.43549   | 61.84089    | 15.75579   | Detected | Detected    | Detected    | Detected    |
| 3633 | A_23_P163408  | SCAPER       | Hs.458986 | S-phase cyclin A-associated protein in the ER                      | Homo sapiens S-phase cyclin A-associated protein in the ER (SCAPER), transcript variant 1, mRNA [NM_020843] | 1.91260 | up | 2.65442 | up | 113.12848   | 61.24646   | 97.63134    | 32.43288   | Detected | Detected    | Detected    | Detected    |
| 3634 | A_23_P348383  | CC2D2A       | Hs.590928 | coiled-coil and C2 domain containing 2A                            | Homo sapiens coiled-coil and C2 domain containing 2A (CC2D2A), transcript variant 1, mRNA [NM_001080522]    | 1.91147 | up | 2.08874 | up | 240.12137   | 130.07591  | 165.59587   | 69.90871   | Detected | Detected    | Detected    | Detected    |
| 3635 | A_33_P3214466 | MESP1        | Hs.447531 | mesoderm posterior 1 homolog (mouse)                               | Homo sapiens mesoderm posterior 1 homolog (mouse) (MESP1), mRNA [NM_018670]                                 | 1.90898 | up | 2.11017 | up | 189.52153   | 102.79931  | 156.76414   | 65.50794   | Detected | Detected    | Detected    | Detected    |
| 3636 | A_23_P157726  | DENN4C       | Hs.249591 | DENN/MADD domain containing 4C                                     | Homo sapiens DENN/MADD domain containing 4C (DENN4C), mRNA [NM_017925]                                      | 1.90830 | up | 2.03087 | up | 2634.84860  | 1429.68870 | 2352.46560  | 1021.42630 | Detected | Detected    | Detected    | Detected    |
| 3637 | A_23_P34443   | ZCCHC11      | Hs.655407 | zinc finger, CCHC domain containing 11                             | Homo sapiens zinc finger, CCHC domain containing 11 (ZCCHC11), transcript variant 1, mRNA [NM_001009881]    | 1.90830 | up | 2.05636 | up | 1511.03780  | 819.90106  | 689.37213   | 295.61053  | Detected | Detected    | Detected    | Detected    |
| 3638 | A_33_P3254751 | LOC100131355 | Hs.660782 | hypothetical protein LOC100131355                                  | Homo sapiens cDNA FLJ42223 fis, clone THYMU2039989, [AK124217]                                              | 1.90665 | up | 2.51456 | up | 91.69806    | 49.79923   | 66.61211    | 23.35912   | Detected | Detected    | Detected    | Detected    |
| 3639 | A_33_P3341494 | ZNF658       | Hs.522147 | zinc finger protein 658                                            | Homo sapiens zinc finger protein 658 (ZNF658), mRNA [NM_033160]                                             | 1.90383 | up | 2.39002 | up | 180.87292   | 98.37334   | 152.45934   | 56.24946   | Detected | Detected    | Detected    | Detected    |
| 3640 | A_23_P361049  | MYO1B        | Hs.439620 | myosin IB                                                          | Homo sapiens myosin IB (MYO1B), transcript variant 2, mRNA [NM_012223]                                      | 1.90310 | up | 2.14649 | up | 11705.36300 | 6368.77340 | 6133.96600  | 2519.86940 | Detected | Detected    | Detected    | Detected    |
| 3641 | A_23_P35645   | RBM17        | Hs.498548 | RNA binding motif protein 17                                       | Homo sapiens RNA binding motif protein 17 (RBM17), transcript variant 1, mRNA [NM_032905]                   | 1.89794 | up | 2.08772 | up | 5679.22170  | 3098.40920 | 5591.55100  | 2361.70200 | Detected | Detected    | Detected    | Detected    |
| 3642 | A_33_P3352958 | FLJ35220     | Hs.389678 | hypothetical protein FLJ35220                                      | Homo sapiens hypothetical protein FLJ35220 (FLJ35220), transcript variant 3, mRNA [NM_001164638]            | 1.89631 | up | 2.04115 | up | 271.11243   | 148.03769  | 382.62598   | 165.29713  | Detected | Detected    | Detected    | Detected    |
| 3643 | A_23_P103486  | CYP2J2       | Hs.152096 | cytochrome P450, family 2, subfamily J, polypeptide 2              | Homo sapiens cytochrome P450, family 2, subfamily J, polypeptide 2 (CYP2J2), mRNA [NM_000775]               | 1.89550 | up | 2.04884 | up | 122.54324   | 66.94190   | 69.79430    | 30.03850   | Detected | Detected    | Detected    | Detected    |
| 3644 | A_23_P29485   | GCA          | Hs.377894 | grancalcin, EF-hand calcium binding protein                        | Homo sapiens grancalcin, EF-hand calcium binding protein (GCA), mRNA [NM_012198]                            | 1.89486 | up | 2.08578 | up | 543.39710   | 296.94330  | 378.93396   | 160.19928  | Detected | Detected    | Detected    | Detected    |
| 3645 | A_33_P3327587 | LOC100127904 | Hs.632266 | hypothetical LOC100127904                                          | PREDICTED: Homo sapiens hypothetical LOC100127904 (LOC100127904), miscRNA [XR_078564]                       | 1.89380 | up | 2.58811 | up | 317.74900   | 173.73337  | 55.11639    | 18.77859   | Detected | Detected    | Detected    | Detected    |
| 3646 | A_23_P377965  | C18orf18     | Hs.657197 | chromosome 18 open reading frame 18                                | Homo sapiens chromosome 18 open reading frame 18 (C18orf18), non-coding RNA [NR_026849]                     | 1.89345 | up | 2.89130 | up | 352.27330   | 192.64587  | 219.24927   | 66.86680   | Detected | Detected    | Detected    | Detected    |
| 3647 | A_24_P161036  | ACOT1        | Hs.568046 | acyl-CoA thioesterase 1                                            | Homo sapiens acyl-CoA thioesterase 1 (ACOT1), mRNA [NM_001037161]                                           | 1.89304 | up | 2.07108 | up | 17085.04900 | 9345.22000 | 16663.53000 | 7094.71100 | Detected | Detected    | Detected    | Detected    |
| 3648 | A_33_P3348011 | LOC222699    | Hs.161441 | transducer of ERBB2, 2 pseudogene                                  | Homo sapiens transducer of ERBB2, 2 pseudogene (LOC222699), non-coding RNA [NR_002936]                      | 1.88910 | up | 2.16438 | up | 306.09555   | 167.77763  | 253.94376   | 103.45911  | Detected | Detected    | Detected    | Detected    |
| 3649 | A_32_P210642  | EGFL7        | Hs.91481  | EGF-like-domain, multiple 7                                        | Homo sapiens EGF-like-domain, multiple 7 (EGFL7), transcript variant 2, mRNA [NM_201446]                    | 1.87891 | up | 2.14133 | up | 1151.88600  | 634.69070  | 1178.89650  | 485.46405  | Detected | Detected    | Detected    | Detected    |
| 3650 | A_33_P3312807 | IPW          |           | imprinted in Prader-Willi syndrome (non-protein coding)            | Homo sapiens imprinted in Prader-Willi syndrome (non-protein coding) (IPW), non-coding RNA [NR_023915]      | 1.87465 | up | 2.16767 | up | 83.59007    | 46.17073   | 56.35529    | 22.92488   | Detected | Detected    | Detected    | Detected    |
| 3651 | A_24_P3005933 | TMCC3        | Hs.370410 | transmembrane and coiled-coil domain family 3                      | Homo sapiens transmembrane and coiled-coil domain family 3 (TMCC3), mRNA [NM_020698]                        | 1.87374 | up | 2.54699 | up | 283.08734   | 156.43910  | 251.12468   | 86.94157   | Detected | Detected    | Detected    | Detected    |
| 3652 | A_33_P3401990 | VPREB3       | Hs.136713 | pre-B lymphocyte 3                                                 | Homo sapiens pre-B lymphocyte 3 (VPREB3), mRNA [NM_013378]                                                  | 1.87310 | up | 2.50424 | up | 108.16008   | 59.79153   | 79.51505    | 27.99874   | Detected | Detected    | Detected    | Detected    |
| 3653 | A_23_P77529   | MSLN         | Hs.408488 | mesothelin                                                         | Homo sapiens mesothelin (MSLN), transcript variant 1, mRNA [NM_005823]                                      | 1.87142 | up | 2.09734 | up | 23.33619    | 12.91192   | 8.48618     | 3.56787    | Detected | Compromised | Compromised | Compromised |
| 3654 | A_24_P108291  | IMPACT       | Hs.515317 | Impact homolog (mouse)                                             | Homo sapiens Impact homolog (mouse) (IMPACT), mRNA [NM_018439]                                              | 1.87043 | up | 2.14477 | up | 840.16064   | 465.10696  | 525.59143   | 216.08942  | Detected | Detected    | Detected    | Detected    |
| 3655 | A_23_P363878  | RFTN2        | Hs.591615 | raftlin family member 2                                            | Homo sapiens raftlin family member 2 (RFTN2), mRNA [NM_144629]                                              | 1.86953 | up | 2.07171 | up | 92.76392    | 51.37819   | 92.49509    | 39.36906   | Detected | Detected    | Detected    | Detected    |
| 3656 | A_24_P370096  | ZNF230       | Hs.193583 | zinc finger protein 230                                            | Homo sapiens zinc finger protein 230 (ZNF230), mRNA [NM_006300]                                             | 1.86583 | up | 2.10162 | up | 224.00919   | 124.31620  | 162.65820   | 68.24775   | Detected | Detected    | Detected    | Detected    |
| 3657 | A_33_P3337627 | TRPC6        | Hs.159003 | transient receptor potential cation channel, subfamily C, member 6 | Homo sapiens transient receptor potential cation channel, subfamily C, member 6 (TRPC6), mRNA [NM_004621]   | 1.86313 | up | 2.07714 | up | 10329.43500 | 5740.72660 | 667.89000   | 283.53380  | Detected | Detected    | Detected    | Detected    |

|      |               |              |           |                                                                         |                                                                                                                                     |         |    |         |    |            |           |           |           |          |             |             |             |
|------|---------------|--------------|-----------|-------------------------------------------------------------------------|-------------------------------------------------------------------------------------------------------------------------------------|---------|----|---------|----|------------|-----------|-----------|-----------|----------|-------------|-------------|-------------|
| 3658 | A_33_P333987  | LOC100128655 |           | similar to hCG1645245                                                   | PREDICTED: Homo sapiens similar to hCG1645245 (LOC100128655), mRNA [XM_001716495]                                                   | 1.86287 | up | 2.09937 | up | 13.70002   | 7.61504   | 20.37450  | 8.55783   | Detected | Compromised | Detected    | Compromised |
| 3659 | A_23_P379746  | DENND5B      | Hs.118166 | DENN/MADD domain containing 5B                                          | Homo sapiens DENN/MADD domain containing 5B (DENND5B), mRNA [NM_144973]                                                             | 1.86276 | up | 2.00071 | up | 380.99630  | 211.78563 | 318.52963 | 140.38838 | Detected | Detected    | Detected    | Detected    |
| 3660 | A_33_P3242508 | ZNF365       | Hs.22653  | zinc finger protein 365                                                 | Homo sapiens zinc finger protein 365 (ZNF365), transcript variant B, mRNA [NM_189450]                                               | 1.86269 | up | 2.89938 | up | 21.38459   | 11.88760  | 21.51624  | 6.54375   | Detected | Compromised | Detected    | Compromised |
| 3661 | A_32_P25737   | CHIC1        | Hs.496323 | cysteine-rich hydrophobic domain 1                                      | Homo sapiens cysteine-rich hydrophobic domain 1 (CHIC1), mRNA [NM_001039840]                                                        | 1.86210 | up | 2.10062 | up | 234.72844  | 130.52571 | 164.73367 | 69.15125  | Detected | Detected    | Detected    | Detected    |
| 3662 | A_23_P413923  | DMRTA1       | Hs.371976 | DMRT-like family A1                                                     | Homo sapiens DMRT-like family A1 (DMRTA1), mRNA [NM_022160]                                                                         | 1.86192 | up | 3.33913 | up | 21.53626   | 11.97686  | 23.54715  | 6.21829   | Detected | Compromised | Detected    | Compromised |
| 3663 | A_23_P215318  | VPS41        | Hs.592184 | vacuolar protein sorting 41 homolog (S. cerevisiae)                     | Homo sapiens vacuolar protein sorting 41 homolog (S. cerevisiae) (VPS41), transcript variant 1, mRNA [NM_014396]                    | 1.85976 | up | 2.13759 | up | 593.43646  | 330.40717 | 527.13000 | 217.44990 | Detected | Detected    | Detected    | Detected    |
| 3664 | A_33_P3289338 | LOC100131346 | Hs.640125 | hypothetical protein LOC100131346                                       | Homo sapiens cDNA FLJ45704 fis, clone FEBRA2026977, [AK127606]                                                                      | 1.85894 | up | 2.29898 | up | 17.68627   | 9.85156   | 14.18271  | 5.43988   | Detected | Compromised | Compromised | Compromised |
| 3665 | A_33_P3245480 |              | Hs.656830 |                                                                         | hypothetical LOC728855 (LOC728855), non-coding RNA [Source/RefSeq DNA-Acc.NR_024510] [ENST00000412305]                              | 1.85862 | up | 3.55237 | up | 17.46534   | 9.73013   | 25.42032  | 6.30999   | Detected | Compromised | Detected    | Compromised |
| 3666 | A_33_P3241051 | ADAMTS17     | Hs.513200 | ADAM metalloproteinase with thrombospondin type 1 motif, 17             | Homo sapiens ADAM metalloproteinase with thrombospondin type 1 motif, 17 (ADAMTS17), mRNA [NM_139057]                               | 1.85748 | up | 4.02284 | up | 14.46294   | 8.06244   | 12.66675  | 2.77651   | Detected | Compromised | Detected    | Compromised |
| 3667 | A_33_P3242493 | PIBF1        | Hs.441926 | progesterone immunomodulatory binding factor 1                          | Homo sapiens progesterone immunomodulatory binding factor 1 (PIBF1), mRNA [NM_006346]                                               | 1.85562 | up | 2.30987 | up | 68.03877   | 37.96658  | 59.84474  | 22.84572  | Detected | Detected    | Detected    | Detected    |
| 3668 | A_23_P31739   | STMN4        | Hs.201058 | stathmin-like 4                                                         | Homo sapiens stathmin-like 4 (STMN4), mRNA [NM_030795]                                                                              | 1.85484 | up | 8.24674 | up | 41.53862   | 23.18884  | 26.36396  | 2.81899   | Detected | Detected    | Detected    | Compromised |
| 3669 | A_23_P428640  | PPP1R3E      | Hs.601513 | protein phosphatase 1, regulatory (inhibitor) subunit 3E                | Homo sapiens protein phosphatase 1, regulatory (inhibitor) subunit 3E (PPP1R3E), non-coding RNA [NR_026862]                         | 1.85392 | up | 2.66505 | up | 84.25430   | 47.05807  | 92.37248  | 30.56352  | Detected | Detected    | Detected    | Detected    |
| 3670 | A_33_P3571254 | CG012        | Hs.687692 | hypothetical gene CG012                                                 | Novel human gene mapping to chromosome 13 [AL049782]                                                                                | 1.85376 | up | 2.55187 | up | 462.74040  | 258.47446 | 268.33850 | 92.72365  | Detected | Detected    | Detected    | Detected    |
| 3671 | A_33_P3292235 | PAQR3        |           | progesterin and adipoQ receptor family member III                       | Homo sapiens progesterin and adipoQ receptor family member III, mRNA (cDNA clone MGC:39698 IMAGE:5271599), complete cds. [BC031256] | 1.85369 | up | 2.11019 | up | 94.45179   | 52.76030  | 68.33144  | 28.55389  | Detected | Detected    | Detected    | Detected    |
| 3672 | A_23_P384329  | DENND4A      | Hs.654567 | DENN/MADD domain containing 4A                                          | Homo sapiens DENN/MADD domain containing 4A (DENND4A), transcript variant 1, mRNA [NM_001144823]                                    | 1.85355 | up | 2.36099 | up | 41.46604   | 23.16443  | 43.07253  | 16.08686  | Detected | Detected    | Detected    | Compromised |
| 3673 | A_23_P34827   | HCN3         | Hs.706960 | hyperpolarization activated cyclic nucleotide-gated potassium channel 3 | Homo sapiens hyperpolarization activated cyclic nucleotide-gated potassium channel 3 (HCN3), mRNA [NM_020897]                       | 1.85180 | up | 2.57895 | up | 159.80170  | 89.35528  | 113.56823 | 38.83109  | Detected | Detected    | Detected    | Detected    |
| 3674 | A_33_P3278515 | LOC642340    | Hs.655951 | hypothetical LOC642340                                                  | PREDICTED: Homo sapiens hypothetical LOC642340 (LOC642340), mRNA [XM_001714255]                                                     | 1.85083 | up | 2.09809 | up | 42.69819   | 23.88781  | 35.24102  | 14.81118  | Detected | Detected    | Detected    | Detected    |
| 3675 | A_32_P11230   | LOC399744    | Hs.534942 | hypothetical LOC399744                                                  | Homo sapiens hypothetical LOC399744 (LOC399744), non-coding RNA [NR_024497]                                                         | 1.85052 | up | 2.12715 | up | 1065.11900 | 595.98706 | 752.12250 | 311.78580 | Detected | Detected    | Detected    | Detected    |
| 3676 | A_33_P3276207 | FAM55C       | Hs.595933 | family with sequence similarity 55, member C                            | Homo sapiens family with sequence similarity 55, member C (FAM55C), transcript variant 1, mRNA [NM_001134456]                       | 1.84993 | up | 2.69171 | up | 150.68631  | 84.34351  | 189.42834 | 62.05583  | Detected | Detected    | Detected    | Detected    |
| 3677 | A_33_P3229527 | LOC100134387 |           | similar to DEAH (Asp-Glu-Ala-His) box polypeptide 40                    | PREDICTED: Homo sapiens similar to DEAH (Asp-Glu-Ala-His) box polypeptide 40 (LOC100134387), mRNA [XM_001717070]                    | 1.84897 | up | 2.11564 | up | 265.18997  | 148.51180 | 229.39333 | 95.61038  | Detected | Detected    | Detected    | Detected    |
| 3678 | A_23_P373927  | ERP44        | Hs.154023 | endoplasmic reticulum protein 44                                        | Homo sapiens endoplasmic reticulum protein 44 (ERP44), mRNA [NM_015051]                                                             | 1.84666 | up | 2.19343 | up | 184.82797  | 103.63680 | 121.40168 | 48.80535  | Detected | Detected    | Detected    | Detected    |
| 3679 | A_33_P3322589 | FANCL        | Hs.720331 | Fanconi anemia, complementation group L                                 | Homo sapiens Fanconi anemia, complementation group L (FANCL), transcript variant 1, mRNA [NM_001114636]                             | 1.84645 | up | 2.08721 | up | 283.66486  | 159.07448 | 208.92177 | 88.26406  | Detected | Detected    | Detected    | Detected    |
| 3680 | A_33_P3446495 | FRMD4B       | Hs.709671 | FERM domain containing 4B                                               | Homo sapiens FERM domain containing 4B (FRMD4B), mRNA [NM_015123]                                                                   | 1.84449 | up | 2.95349 | up | 20.72036   | 11.63199  | 9.69492   | 2.89451   | Detected | Compromised | Compromised | Compromised |
| 3681 | A_23_P157527  | LRRCC1       | Hs.193115 | leucine rich repeat and coiled-coil domain containing 1                 | Homo sapiens leucine rich repeat and coiled-coil domain containing 1 (LRRCC1), transcript variant 1, mRNA [NM_033402]               | 1.84226 | up | 2.15777 | up | 219.86043  | 123.57446 | 146.89542 | 60.03005  | Detected | Detected    | Detected    | Detected    |
| 3682 | A_23_P140290  | RTN1         | Hs.368626 | reticulon 1                                                             | Homo sapiens reticulon 1 (RTN1), transcript variant 1, mRNA [NM_021136]                                                             | 1.84220 | up | 2.86871 | up | 17.32572   | 9.73843   | 13.27895  | 4.08172   | Detected | Compromised | Detected    | Compromised |
| 3683 | A_33_P3333627 | PHACTR1      | Hs.436996 | phosphatase and actin regulator 1                                       | Homo sapiens phosphatase and actin regulator 1 (PHACTR1), mRNA [NM_030948]                                                          | 1.84194 | up | 4.14308 | up | 33.95574   | 19.08847  | 49.32464  | 10.49799  | Detected | Detected    | Detected    | Compromised |
| 3684 | A_33_P3364443 | LOC388279    | Hs.681782 | hypothetical gene supported by AF275804                                 | PREDICTED: Homo sapiens hypothetical LOC388279 (LOC388279), mRNA [XM_373688]                                                        | 1.84148 | up | 7.22290 | up | 41.89097   | 23.55514  | 33.57396  | 4.09880   | Detected | Detected    | Detected    | Compromised |
| 3685 | A_23_P69154   | FAM198A      | Hs.720172 | family with sequence similarity 198, member A                           | Homo sapiens family with sequence similarity 198, member A (FAM198A), mRNA [NM_001129908]                                           | 1.84136 | up | 2.23986 | up | 23.29176   | 13.09774  | 29.10685  | 11.45882  | Detected | Compromised | Detected    | Compromised |
| 3686 | A_33_P3333537 | VPS13C       | Hs.511668 | vacuolar protein sorting 13 homolog C (S. cerevisiae)                   | Homo sapiens vacuolar protein sorting 13 homolog C (S. cerevisiae) (VPS13C), transcript variant 2B, mRNA [NM_001016088]             | 1.84130 | up | 2.06404 | up | 137.52003  | 77.33466  | 145.76201 | 62.27171  | Detected | Detected    | Detected    | Detected    |

|      |               |              |           |                                                                          |                                                                                                                                            |         |    |         |    |            |            |            |            |             |             |             |             |
|------|---------------|--------------|-----------|--------------------------------------------------------------------------|--------------------------------------------------------------------------------------------------------------------------------------------|---------|----|---------|----|------------|------------|------------|------------|-------------|-------------|-------------|-------------|
| 3687 | A_33_P333327  |              |           |                                                                          |                                                                                                                                            | 1.83984 | up | 2.65391 | up | 37.96538   | 21.36691   | 28.24818   | 9.38576    | Detected    | Detected    | Detected    | Compromised |
| 3688 | A_24_P115990  | AMHR2        | Hs.659889 | anti-Mullerian hormone receptor, type II                                 | Homo sapiens anti-Mullerian hormone receptor, type II (AMHR2), transcript variant 1, mRNA [NM_020547]                                      | 1.83957 | up | 8.62239 | up | 5.33054    | 3.00045    | 31.39744   | 3.21094    | Compromised | Compromised | Detected    | Compromised |
| 3689 | A_23_P169092  | CYP7B1       | Hs.667720 | cytochrome P450, family 7, subfamily B, polypeptide 1                    | Homo sapiens cytochrome P450, family 7, subfamily B, polypeptide 1 (CYP7B1), mRNA [NM_004820]                                              | 1.83955 | up | 2.19712 | up | 101.53169  | 57.15080   | 121.74761  | 48.86221   | Detected    | Detected    | Detected    | Detected    |
| 3690 | A_33_P3392460 | LOC100128077 | Hs.710111 | hypothetical protein LOC100128077                                        | PREDICTED: Homo sapiens hypothetical protein LOC100128077 (LOC100128077), miscRNA [XR_078411]                                              | 1.83889 | up | 2.17058 | up | 10.22851   | 5.75956    | 16.32040   | 6.63012    | Compromised | Compromised | Detected    | Compromised |
| 3691 | A_23_P345564  | OPRL1        | Hs.2859   | opiate receptor-like 1                                                   | Homo sapiens opiate receptor-like 1 (OPRL1), transcript variant 1, mRNA [NM_182647]                                                        | 1.83745 | up | 2.11890 | up | 106.92088  | 60.25311   | 94.40613   | 39.28757   | Detected    | Detected    | Detected    | Detected    |
| 3692 | A_33_P3249743 |              | Hs.370479 |                                                                          | Putative uncharacterized protein ENSP00000305441 Fragment [Source:UniProtKB/TrEMBL;Acc.B5MD0] [ENST00000304813]                            | 1.83648 | up | 2.20921 | up | 15.92774   | 8.98049    | 9.11617    | 3.64030    | Detected    | Compromised | Compromised | Compromised |
| 3693 | A_23_P35970   | SLC37A4      | Hs.719203 | solute carrier family 37 (glucose-6-phosphate transporter), member 4     | Homo sapiens solute carrier family 37 (glucose-6-phosphate transporter), member 4 (SLC37A4), transcript variant 4, mRNA [NM_001467]        | 1.83565 | up | 2.21137 | up | 1397.58560 | 788.35450  | 1237.96850 | 493.64480  | Detected    | Detected    | Detected    | Detected    |
| 3694 | A_33_P3303449 | LEPR         | Hs.23581  | leptin receptor                                                          | Homo sapiens leptin receptor (LEPR), transcript variant 2, mRNA [NM_001003680]                                                             | 1.83519 | up | 2.17437 | up | 121.97288  | 68.81999   | 113.61305  | 46.07445   | Detected    | Detected    | Detected    | Detected    |
| 3695 | A_33_P3334185 | AGTPBP1      | Hs.719980 | ATP/GTP binding protein 1                                                | Homo sapiens ATP/GTP binding protein 1 (AGTPBP1), mRNA [NM_015239]                                                                         | 1.83319 | up | 2.68594 | up | 23.93548   | 13.51973   | 21.73516   | 7.13562    | Detected    | Compromised | Detected    | Compromised |
| 3696 | A_23_P310086  | BEND6        | Hs.582993 | BEN domain containing 6                                                  | Homo sapiens BEN domain containing 6 (BEND6), mRNA [NM_152731]                                                                             | 1.83295 | up | 2.08022 | up | 138.32306  | 78.14058   | 133.94261  | 56.77732   | Detected    | Detected    | Detected    | Detected    |
| 3697 | A_23_P29773   | LAMP3        | Hs.518448 | lysosomal-associated membrane protein 3                                  | Homo sapiens lysosomal-associated membrane protein 3 (LAMP3), mRNA [NM_014398]                                                             | 1.83188 | up | 3.67405 | up | 30.17534   | 17.05645   | 17.42260   | 4.18152    | Detected    | Compromised | Detected    | Compromised |
| 3698 | A_24_P573533  | CBWD5        | Hs.645337 | COBW domain containing 5                                                 | Homo sapiens COBW domain containing 5 (CBWD5), mRNA [NM_001024916]                                                                         | 1.83000 | up | 2.04573 | up | 504.75640  | 285.60397  | 130.44746  | 56.22807   | Detected    | Detected    | Detected    | Detected    |
| 3699 | A_33_P3370521 | LOC100133008 | Hs.576457 | hypothetical LOC100133008                                                | PREDICTED: Homo sapiens hypothetical LOC100133008 (LOC100133008), mRNA [XM_001723587]                                                      | 1.82959 | up | 2.05971 | up | 6159.20600 | 3485.82030 | 721.81836  | 309.02112  | Detected    | Detected    | Detected    | Detected    |
| 3700 | A_33_P3236177 | ANG          | Hs.283749 | angiogenin, ribonuclease, RNase A family, 5                              | Homo sapiens angiogenin, ribonuclease, RNase A family, 5 (ANG), transcript variant 1, mRNA [NM_001145]                                     | 1.82452 | up | 2.07483 | up | 2500.26070 | 1418.95530 | 2943.07280 | 1250.78910 | Detected    | Detected    | Detected    | Detected    |
| 3701 | A_24_P69538   | TLR4         | Hs.174312 | toll-like receptor 4                                                     | Homo sapiens toll-like receptor 4 (TLR4), transcript variant 1, mRNA [NM_138554]                                                           | 1.82287 | up | 2.16676 | up | 203.27806  | 115.46950  | 209.31049  | 85.18146   | Detected    | Detected    | Detected    | Detected    |
| 3702 | A_33_P3278220 |              | Hs.19012  |                                                                          | Rab9 effector protein with Kelch motifs (40 kDa Rab9 effector protein)(p40) [Source:UniProtKB/Swiss-Prot;Acc:Q7Z6M1] [ENST00000373544]     | 1.82210 | up | 2.15330 | up | 8955.37500 | 5089.15530 | 920.98540  | 377.14893  | Detected    | Detected    | Detected    | Detected    |
| 3703 | A_33_P3378047 | SESTD1       | Hs.30977  | SEC14 and spectrin domains 1                                             | Homo sapiens SEC14 and spectrin domains 1 (SESTD1), mRNA [NM_178123]                                                                       | 1.82080 | up | 2.04299 | up | 1536.53660 | 873.80225  | 1113.96970 | 480.80798  | Detected    | Detected    | Detected    | Detected    |
| 3704 | A_23_P432610  | N4BP1        | Hs.511839 | NEDD4 binding protein 1                                                  | Homo sapiens NEDD4 binding protein 1 (N4BP1), mRNA [NM_153029]                                                                             | 1.81915 | up | 2.58148 | up | 521.91565  | 297.07404  | 455.26736  | 155.51193  | Detected    | Detected    | Detected    | Detected    |
| 3705 | A_23_P55616   | SLC14A1      | Hs.101307 | solute carrier family 14 (urea transporter), member 1 (Kidd blood group) | Homo sapiens solute carrier family 14 (urea transporter), member 1 (Kidd blood group) (SLC14A1), transcript variant 4, mRNA [NM_001146037] | 1.81860 | up | 4.29687 | up | 16.12224   | 9.17954    | 15.61083   | 3.20360    | Detected    | Compromised | Detected    | Compromised |
| 3706 | A_33_P3350703 | ERO1LB       | Hs.558519 | ERO1-like beta (S. cerevisiae)                                           | Homo sapiens ERO1-like beta (S. cerevisiae) (ERO1LB), mRNA [NM_019891]                                                                     | 1.81795 | up | 2.26649 | up | 228.95142  | 130.40518  | 175.89957  | 68.43462   | Detected    | Detected    | Detected    | Detected    |
| 3707 | A_23_P105562  | VWF          | Hs.440848 | von Willebrand factor                                                    | Homo sapiens von Willebrand factor (VWF), mRNA [NM_000552]                                                                                 | 1.81764 | up | 2.32779 | up | 82.05867   | 46.74668   | 78.85735   | 29.87193   | Detected    | Detected    | Detected    | Detected    |
| 3708 | A_33_P3424347 | LOC100131271 | Hs.624900 | hypothetical protein LOC100131271                                        | PREDICTED: Homo sapiens hypothetical LOC100131271 (LOC100131271), mRNA [XM_001716273]                                                      | 1.81747 | up | 3.28077 | up | 44.51840   | 25.36332   | 39.87806   | 10.71824   | Detected    | Detected    | Detected    | Compromised |
| 3709 | A_23_P49865   | YBX2         | Hs.567494 | Y box binding protein 2                                                  | Homo sapiens Y box binding protein 2 (YBX2), mRNA [NM_015982]                                                                              | 1.81726 | up | 2.68508 | up | 117.74308  | 67.08908   | 69.31644   | 22.76379   | Detected    | Detected    | Detected    | Detected    |
| 3710 | A_33_P3395713 | BRWD1        | Hs.654740 | bromodomain and WD repeat domain containing 1                            | Homo sapiens bromodomain and WD repeat domain containing 1 (BRWD1), transcript variant 1, mRNA [NM_018963]                                 | 1.81687 | up | 2.59552 | up | 198.85774  | 113.33181  | 218.22310  | 74.13821   | Detected    | Detected    | Detected    | Detected    |
| 3711 | A_33_P3264835 |              |           |                                                                          | Rap1 GTPase-activating protein 1 (Rap1GAP1)(Rap1GAP) [Source:UniProtKB/Swiss-Prot;Acc:P47736] [ENST00000374757]                            | 1.81672 | up | 2.42318 | up | 21.20876   | 12.08817   | 8.96947    | 3.26397    | Detected    | Compromised | Compromised | Compromised |
| 3712 | A_23_P151565  | RALGAP1      | Hs.113150 | Ral GTPase activating protein, alpha subunit 1 (catalytic)               | Homo sapiens Ral GTPase activating protein, alpha subunit 1 (catalytic) (RALGAP1), transcript variant 1, mRNA [NM_014990]                  | 1.81564 | up | 2.19797 | up | 1449.07590 | 826.40940  | 1039.91860 | 417.19925  | Detected    | Detected    | Detected    | Detected    |
| 3713 | A_23_P360804  | CPNE5        | Hs.657869 | copine V                                                                 | Homo sapiens copine V (CPNE5), mRNA [NM_020939]                                                                                            | 1.81454 | up | 2.07071 | up | 336.16782  | 191.83290  | 273.18668  | 116.33379  | Detected    | Detected    | Detected    | Detected    |
| 3714 | A_33_P3409518 | TUBBP5       |           | tubulin, beta pseudogene 5                                               | Homo sapiens tubulin, beta pseudogene 5 (TUBBP5), non-coding RNA [NR_027156]                                                               | 1.81177 | up | 2.07314 | up | 6482.47360 | 3704.85600 | 889.81134  | 378.47333  | Detected    | Detected    | Detected    | Detected    |
| 3715 | A_33_P3216442 | COL11A2      | Hs.390171 | collagen, type XI, alpha 2                                               | Homo sapiens collagen, type XI, alpha 2 (COL11A2), transcript variant 1, mRNA [NM_080680]                                                  | 1.80888 | up | 2.33947 | up | 254.75609  | 145.83038  | 183.10619  | 69.01612   | Detected    | Detected    | Detected    | Detected    |

|      |               |              |           |                                                                                               |                                                                                                                                                                                                                                                                                                 |         |    |         |    |            |            |            |            |          |             |             |             |
|------|---------------|--------------|-----------|-----------------------------------------------------------------------------------------------|-------------------------------------------------------------------------------------------------------------------------------------------------------------------------------------------------------------------------------------------------------------------------------------------------|---------|----|---------|----|------------|------------|------------|------------|----------|-------------|-------------|-------------|
| 3716 | A_33_P3380311 | ATRX         | Hs.533526 | alpha thalassemia/mental retardation syndrome X-linked (RAD54 homolog, <i>S. cerevisiae</i> ) | Homo sapiens alpha thalassemia/mental retardation syndrome X-linked (RAD54 homolog, <i>S. cerevisiae</i> ) (ATRX), transcript variant 1, mRNA [NM_000489]                                                                                                                                       | 1.80572 | up | 3.57674 | up | 59.20575   | 33.95045   | 13.64940   | 3.36505    | Detected | Detected    | Detected    | Compromised |
| 3717 | A_24_P148907  | MAB21L2      | Hs.584852 | mab-21-like 2 ( <i>C. elegans</i> )                                                           | Homo sapiens mab-21-like 2 ( <i>C. elegans</i> ) (MAB21L2), mRNA [NM_006439]                                                                                                                                                                                                                    | 1.79942 | up | 2.04080 | up | 5011.31200 | 2883.71800 | 827.68604  | 357.62686  | Detected | Detected    | Detected    | Detected    |
| 3718 | A_33_P3237235 | FBXO44       | Hs.556006 | F-box protein 44                                                                              | Homo sapiens F-box protein 44 (FBXO44), transcript variant 4, mRNA [NM_001014765]                                                                                                                                                                                                               | 1.79842 | up | 2.44646 | up | 132.84291  | 76.48566   | 88.99882   | 32.07827   | Detected | Detected    | Detected    | Detected    |
| 3719 | A_33_P3388466 | BTN3A1       | Hs.191510 | butyrophilin, subfamily 3, member A1                                                          | Homo sapiens butyrophilin, subfamily 3, member A1 (BTN3A1), transcript variant 1, mRNA [NM_007048]                                                                                                                                                                                              | 1.79802 | up | 2.33954 | up | 20.39783   | 11.74689   | 14.30394   | 5.39127    | Detected | Compromised | Detected    | Compromised |
| 3720 | A_23_P500271  | IRF5         | Hs.521181 | interferon regulatory factor 5                                                                | Homo sapiens interferon regulatory factor 5 (IRF5), transcript variant 1, mRNA [NM_002200]                                                                                                                                                                                                      | 1.79662 | up | 2.73609 | up | 64.92951   | 37.42121   | 50.05281   | 16.13107   | Detected | Detected    | Detected    | Compromised |
| 3721 | A_23_P58862   | FAM135A      | Hs.211700 | family with sequence similarity 135, member A                                                 | Homo sapiens family with sequence similarity 135, member A (FAM135A), transcript variant 2, mRNA [NM_020819]                                                                                                                                                                                    | 1.79568 | up | 3.43994 | up | 47.05703   | 27.13497   | 36.56421   | 9.37284    | Detected | Detected    | Detected    | Compromised |
| 3722 | A_24_P943815  | PNPLA4       | Hs.264    | patatin-like phospholipase domain containing 4                                                | Homo sapiens patatin-like phospholipase domain containing 4 (PNPLA4), transcript variant 1, mRNA [NM_004650]                                                                                                                                                                                    | 1.79475 | up | 2.02392 | up | 97.26424   | 56.11547   | 55.23953   | 24.06701   | Detected | Detected    | Detected    | Detected    |
| 3723 | A_33_P3295056 | PTPRCAP      | Hs.155975 | protein tyrosine phosphatase, receptor type, C-associated protein                             | Homo sapiens protein tyrosine phosphatase, receptor type, C-associated protein (PTPRCAP), mRNA [NM_005608]                                                                                                                                                                                      | 1.79431 | up | 2.02412 | up | 18.56018   | 10.71070   | 19.49046   | 8.49084    | Detected | Compromised | Detected    | Compromised |
| 3724 | A_23_P18692   | ADH5         | Hs.78989  | alcohol dehydrogenase 5 (class III), chi polypeptide                                          | Homo sapiens alcohol dehydrogenase 5 (class III), chi polypeptide (ADH5), mRNA [NM_000671]                                                                                                                                                                                                      | 1.79297 | up | 2.00190 | up | 7084.92530 | 4091.61870 | 3727.28600 | 1641.78050 | Detected | Detected    | Detected    | Detected    |
| 3725 | A_33_P3391756 | LOC100288271 | Hs.445480 | hypothetical protein LOC100288271                                                             | PREDICTED: Homo sapiens hypothetical protein LOC100288271 (LOC100288271), mRNA [XM_00234021]                                                                                                                                                                                                    | 1.78959 | up | 3.08729 | up | 59.16332   | 34.23195   | 46.79592   | 13.36585   | Detected | Detected    | Detected    | Detected    |
| 3726 | A_33_P3249066 |              |           |                                                                                               |                                                                                                                                                                                                                                                                                                 | 1.78874 | up | 4.65612 | up | 42.95923   | 24.86806   | 29.13458   | 5.51760    | Detected | Detected    | Detected    | Compromised |
| 3727 | A_33_P3418170 | DDX58        | Hs.190622 | DEAD (Asp-Glu-Ala-Asp) box polypeptide 58                                                     | Homo sapiens DEAD (Asp-Glu-Ala-Asp) box polypeptide 58 (DDX58), mRNA [NM_014314]                                                                                                                                                                                                                | 1.78509 | up | 2.34415 | up | 242.55197  | 140.69469  | 154.42091  | 58.08788   | Detected | Detected    | Detected    | Detected    |
| 3728 | A_33_P3303542 | SSCS5        | Hs.554182 | scavenger receptor cysteine-rich glycoprotein                                                 | Homo sapiens scavenger receptor cysteine-rich glycoprotein (SSCS5), mRNA [NM_001144950]                                                                                                                                                                                                         | 1.78494 | up | 2.04844 | up | 1612.87440 | 935.64270  | 1476.85420 | 635.74040  | Detected | Detected    | Detected    | Detected    |
| 3729 | A_33_P3391375 | LANCL3       | Hs.521932 | LanC lantibiotic synthetase component C-like 3 (bacterial)                                    | Homo sapiens LanC lantibiotic synthetase component C-like 3 (bacterial) (LANCL3), mRNA [NM_198511]                                                                                                                                                                                              | 1.78298 | up | 2.34208 | up | 3509.34740 | 2038.03870 | 418.20210  | 157.45255  | Detected | Detected    | Detected    | Detected    |
| 3730 | A_33_P3324839 | SYNGAP1      | Hs.586264 | synaptic Ras GTPase activating protein 1 homolog (rat)                                        | Homo sapiens synaptic Ras GTPase activating protein 1 homolog (rat) (SYNGAP1), mRNA [NM_006772]                                                                                                                                                                                                 | 1.78259 | up | 4.21978 | up | 32.10061   | 18.64636   | 29.77667   | 6.22231    | Detected | Detected    | Detected    | Compromised |
| 3731 | A_23_P147465  | PARK2        | Hs.132954 | Parkinson disease (autosomal recessive, juvenile) 2, parkin                                   | Homo sapiens Parkinson disease (autosomal recessive, juvenile) 2, parkin (PARK2), transcript variant 1, mRNA [NM_004562]                                                                                                                                                                        | 1.78254 | up | 3.63379 | up | 46.65476   | 27.10133   | 48.99404   | 11.88911   | Detected | Detected    | Detected    | Compromised |
| 3732 | A_33_P3319231 | AIFM2        |           | apoptosis-inducing factor, mitochondrion-associated, 2                                        | Apoptosis-inducing factor 2 (EC 1.-.-.-) (Apoptosis-inducing factor-like mitochondrion-associated inducer of death) (Apoptosis-inducing factor homologous mitochondrion-associated inducer of death) (p53-responsive gene 3 protein) [Source:UniProtKB/Swiss-Prot;Acc:Q9BRQ8] [ENST00000373246] | 1.78246 | up | 3.61575 | up | 31.26964   | 18.16499   | 23.40287   | 5.70738    | Detected | Detected    | Detected    | Compromised |
| 3733 | A_33_P3322082 | LOC728806    | Hs.646586 | similar to N-ethylmaleimide-sensitive factor                                                  | PREDICTED: Homo sapiens similar to N-ethylmaleimide-sensitive factor (LOC728806), mRNA [XM_001128535]                                                                                                                                                                                           | 1.78160 | up | 2.46499 | up | 19.85393   | 11.53901   | 25.75382   | 9.21280    | Detected | Compromised | Detected    | Compromised |
| 3734 | A_32_P117812  |              | Hs.562568 |                                                                                               | Putative uncharacterized protein DKFZ779J2370 [Source:UniProtKB/TrEMBL;Acc:Q6MZ R2] [ENST00000378904]                                                                                                                                                                                           | 1.77807 | up | 2.14924 | up | 56.28162   | 32.77552   | 80.47266   | 33.01627   | Detected | Detected    | Detected    | Detected    |
| 3735 | A_24_P396753  | TRIB2        | Hs.467751 | tribbles homolog 2 ( <i>Drosophila</i> )                                                      | Homo sapiens tribbles homolog 2 ( <i>Drosophila</i> ) (TRIB2), transcript variant 1, mRNA [NM_021643]                                                                                                                                                                                           | 1.77668 | up | 2.00358 | up | 146.57445  | 85.42449   | 92.53689   | 40.72614   | Detected | Detected    | Detected    | Detected    |
| 3736 | A_33_P3710442 | FLJ11710     | Hs.657294 | hypothetical protein FLJ11710                                                                 | Homo sapiens cDNA FLJ11710 fis. clone HEMBA1005149 [AK021772]                                                                                                                                                                                                                                   | 1.77652 | up | 2.92834 | up | 25.21724   | 14.69809   | 12.64960   | 3.80909    | Detected | Compromised | Compromised | Compromised |
| 3737 | A_33_P3298128 | ITPR2        | Hs.512235 | inositol 1,4,5-triphosphate receptor, type 2                                                  | Homo sapiens inositol 1,4,5-triphosphate receptor, type 2 (ITPR2), mRNA [NM_002223]                                                                                                                                                                                                             | 1.77620 | up | 2.06544 | up | 222.91933  | 129.95349  | 119.97032  | 51.21861   | Detected | Detected    | Detected    | Detected    |
| 3738 | A_23_P14986   | HSD11B2      | Hs.1376   | hydroxysteroid (11-beta) dehydrogenase 2                                                      | Homo sapiens hydroxysteroid (11-beta) dehydrogenase 2 (HSD11B2), mRNA [NM_000196]                                                                                                                                                                                                               | 1.77613 | up | 3.39402 | up | 82.54202   | 48.12079   | 63.27200   | 16.43854   | Detected | Detected    | Detected    | Detected    |
| 3739 | A_33_P3474859 | LOC203274    | Hs.599821 | hypothetical protein LOC203274                                                                | Homo sapiens cDNA clone IMAGE:5498355 [BC110369]                                                                                                                                                                                                                                                | 1.77606 | up | 2.18072 | up | 2056.24630 | 1198.81090 | 1063.64070 | 430.09152  | Detected | Detected    | Detected    | Detected    |
| 3740 | A_33_P3390753 |              |           |                                                                                               |                                                                                                                                                                                                                                                                                                 | 1.77390 | up | 2.15337 | up | 817.70734  | 477.31125  | 177.66390  | 72.75214   | Detected | Detected    | Detected    | Detected    |
| 3741 | A_33_P3240229 | CREBBP       | Hs.459759 | CREB binding protein                                                                          | Homo sapiens CREB binding protein (CREBBP), transcript variant 1, mRNA [NM_004380]                                                                                                                                                                                                              | 1.77324 | up | 2.00170 | up | 1724.17320 | 1006.80510 | 888.24050  | 391.28806  | Detected | Detected    | Detected    | Detected    |
| 3742 | A_24_P21770   | YPEL4        | Hs.135978 | yippee-like 4 ( <i>Drosophila</i> )                                                           | Homo sapiens yippee-like 4 ( <i>Drosophila</i> ) (YPEL4), mRNA [NM_145006]                                                                                                                                                                                                                      | 1.77313 | up | 2.25784 | up | 237.47269  | 138.67752  | 137.46909  | 53.68812   | Detected | Detected    | Detected    | Detected    |

|      |               |              |           |                                                                                                |                                                                                                                                                                           |         |    |         |    |             |             |            |            |             |             |             |             |
|------|---------------|--------------|-----------|------------------------------------------------------------------------------------------------|---------------------------------------------------------------------------------------------------------------------------------------------------------------------------|---------|----|---------|----|-------------|-------------|------------|------------|-------------|-------------|-------------|-------------|
| 3743 | A_23_P168280  | ICOSLG       |           | inducible T-cell co-stimulator ligand                                                          | ICOS ligand Precursor (B7 homolog 2)(B7-H2)(B7-like protein G150)(B7-related protein 1)(B7RP-1)(CD275 antigen) [Source:UniProtKB/Swiss-Prot;Acc:O75144] [ENST00000407780] | 1.77117 | up | 3.97901 | up | 480.00104   | 280.61700   | 406.16098  | 90.00964   | Detected    | Detected    | Detected    | Detected    |
| 3744 | A_33_P3392097 | LOC344065    | Hs.528395 | similar to zinc finger protein 570                                                             | PREDICTED: Homo sapiens similar to zinc finger protein 570 (LOC344065), mRNA [XM_001714518]                                                                               | 1.77105 | up | 2.10116 | up | 30.64047    | 17.91423    | 22.54569   | 9.46172    | Detected    | Compromised | Detected    | Compromised |
| 3745 | A_33_P3252594 |              |           |                                                                                                |                                                                                                                                                                           | 1.76824 |    | 2.15463 | up | 320.84432   | 187.76520   | 206.05952  | 84.33048   | Detected    | Detected    | Detected    | Detected    |
| 3746 | A_32_P315395  | MGC16275     | Hs.706954 | hypothetical protein MGC16275                                                                  | Homo sapiens hypothetical protein MGC16275 (MGC16275), non-coding RNA [NR_026914]                                                                                         | 1.76758 | up | 2.86390 | up | 25.14880    | 14.73234    | 16.08369   | 4.95214    | Detected    | Compromised | Detected    | Compromised |
| 3747 | A_24_P241183  | CLEC2D       | Hs.268326 | C-type lectin domain family 2, member D                                                        | Homo sapiens C-type lectin domain family 2, member D (CLEC2D), transcript variant 1, mRNA [NM_013269]                                                                     | 1.76671 | up | 2.34295 | up | 93.89303    | 55.03017    | 60.44562   | 22.74927   | Detected    | Detected    | Detected    | Detected    |
| 3748 | A_23_P28434   | VAMP8        | Hs.714302 | vesicle-associated membrane protein 8 (endobrevin)                                             | Homo sapiens vesicle-associated membrane protein 8 (endobrevin) (VAMP8), mRNA [NM_003761]                                                                                 | 1.76654 | up | 2.17225 | up | 271.03610   | 158.86841   | 250.83228  | 101.82161  | Detected    | Detected    | Detected    | Detected    |
| 3749 | A_23_P135248  | CCL27        | Hs.648124 | chemokine (C-C motif) ligand 27                                                                | Homo sapiens chemokine (C-C motif) ligand 27 (CCL27), mRNA [NM_006664]                                                                                                    | 1.76223 | up | 2.20091 | up | 87.76936    | 51.57188    | 87.52036   | 35.06486   | Detected    | Detected    | Detected    | Detected    |
| 3750 | A_23_P207582  | CCL16        | Hs.10458  | chemokine (C-C motif) ligand 16                                                                | Homo sapiens chemokine (C-C motif) ligand 16 (CCL16), mRNA [NM_004590]                                                                                                    | 1.76222 | up | 6.80356 | up | 5.43966     | 3.19629     | 20.69105   | 2.68171    | Compromised | Compromised | Detected    | Compromised |
| 3751 | A_33_P3431595 | C8orf31      | Hs.660382 | chromosome 8 open reading frame 31                                                             | Homo sapiens chromosome 8 open reading frame 31 (C8orf31), mRNA [NM_173687]                                                                                               | 1.76158 | up | 2.01437 | up | 886.36884   | 521.00770   | 757.81226  | 331.73315  | Detected    | Detected    | Detected    | Detected    |
| 3752 | A_24_P940135  | CTBS         | Hs.513557 | chitinase, di-N-acetyl-                                                                        | Homo sapiens chitinase, di-N-acetyl- (CTBS), mRNA [NM_004368]                                                                                                             | 1.76042 | up | 2.14641 | up | 1472.48220  | 866.09520   | 1095.50600 | 450.05728  | Detected    | Detected    | Detected    | Detected    |
| 3753 | A_33_P3381781 |              |           |                                                                                                | Regulation of nuclear pre-mRNA domain-containing protein 2 [Source:UniProtKB/Swiss-Prot;Acc:Q5VT52] [ENST00000369067]                                                     | 1.75706 | up | 6.23331 | up | 30.57419    | 18.01776    | 20.30864   | 2.87295    | Detected    | Detected    | Detected    | Compromised |
| 3754 | A_24_P818268  |              |           |                                                                                                | Putative uncharacterized protein DNMP33 [Source:UniProtKB/TrEMBL;Acc:A6NN47] [ENST00000339692]                                                                            | 1.75660 | up | 2.02218 | up | 285.95100   | 168.55907   | 228.22884  | 99.52145   | Detected    | Detected    | Detected    | Detected    |
| 3755 | A_24_P712562  | C17orf67     | Hs.658949 | chromosome 17 open reading frame 67                                                            | Homo sapiens chromosome 17 open reading frame 67 (C17orf67), mRNA [NM_001085430]                                                                                          | 1.75618 | up | 2.03361 | up | 70.44097    | 41.53251    | 45.73420   | 19.83071   | Detected    | Detected    | Detected    | Detected    |
| 3756 | A_32_P62211   |              | Hs.408455 |                                                                                                | Homo sapiens mRNA: cDNA DKFZp686J1595 (from clone DKFZp686J1595) [BX538057]                                                                                               | 1.75466 | up | 2.42174 | up | 47.43689    | 27.99337    | 53.72361   | 19.56152   | Detected    | Detected    | Detected    | Detected    |
| 3757 | A_23_P110624  | CTNND2       | Hs.314543 | catenin (cadherin-associated protein), delta 2 (neural plakophilin-related arm-repeat protein) | Homo sapiens catenin (cadherin-associated protein), delta 2 (neural plakophilin-related arm-repeat protein) (CTNND2), mRNA [NM_001332]                                    | 1.75378 | up | 2.13378 | up | 61.01253    | 36.02285    | 42.13758   | 17.41351   | Detected    | Detected    | Detected    | Detected    |
| 3758 | A_23_P166823  | TNNC1        | Hs.118845 | troponin C type 1 (slow)                                                                       | Homo sapiens troponin C type 1 (slow) (TNNC1), mRNA [NM_003280]                                                                                                           | 1.75371 | up | 2.70042 | up | 104.09418   | 61.46121    | 109.14289  | 35.63929   | Detected    | Detected    | Detected    | Detected    |
| 3759 | A_33_P3307775 | DENR         | Hs.22393  | density-regulated protein                                                                      | Homo sapiens density-regulated protein (DENR), mRNA [NM_003677]                                                                                                           | 1.75286 | up | 2.10709 | up | 61.44254    | 36.29573    | 48.19349   | 20.16835   | Detected    | Detected    | Detected    | Detected    |
| 3760 | A_33_P3217689 | JMY          | Hs.482605 | junction mediating and regulatory protein, p53 cofactor                                        | Homo sapiens junction mediating and regulatory protein, p53 cofactor (JMY), mRNA [NM_152405]                                                                              | 1.75181 | up | 2.49768 | up | 1333.44740  | 788.17580   | 1815.85360 | 641.07587  | Detected    | Detected    | Detected    | Detected    |
| 3761 | A_23_P309720  | GABRD        | Hs.113882 | gamma-aminobutyric acid (GABA) A receptor, delta                                               | Homo sapiens gamma-aminobutyric acid (GABA) A receptor, delta (GABRD), mRNA [NM_000815]                                                                                   | 1.75156 | up | 3.80506 | up | 19.41164    | 11.47546    | 12.39303   | 2.87198    | Detected    | Compromised | Compromised | Compromised |
| 3762 | A_33_P3463355 | LOC286121    | Hs.449418 | hypothetical protein LOC286121                                                                 | Homo sapiens hypothetical protein LOC286121, mRNA (cDNA clone IMAGE4537614) [BC039302]                                                                                    | 1.75128 | up | 3.81224 | up | 35.12813    | 20.76977    | 28.66014   | 6.62923    | Detected    | Detected    | Detected    | Compromised |
| 3763 | A_24_P363087  | C5orf45      | Hs.310781 | chromosome 5 open reading frame 45                                                             | Homo sapiens chromosome 5 open reading frame 45 (C5orf45), transcript variant 1, mRNA [NM_016175]                                                                         | 1.75097 | up | 3.38284 | up | 2565.71240  | 1517.27050  | 2207.32280 | 575.37310  | Detected    | Detected    | Detected    | Detected    |
| 3764 | A_33_P3287084 | LOC100128009 | Hs.474119 | similar to hCG1642538                                                                          | PREDICTED: Homo sapiens similar to hCG1642538 (LOC100128009), mRNA [XM_001720983]                                                                                         | 1.74956 | up | 2.03951 | up | 32.17534    | 19.04269    | 35.13981   | 15.19281   | Detected    | Detected    | Detected    | Detected    |
| 3765 | A_24_P791040  | FBXW2        | Hs.494985 | F-box and WD repeat domain containing 2                                                        | Homo sapiens F-box and WD repeat domain containing 2 (FBXW2), mRNA [NM_012164]                                                                                            | 1.74928 | up | 2.92574 | up | 21.89641    | 12.96121    | 24.10544   | 7.26514    | Detected    | Compromised | Detected    | Compromised |
| 3766 | A_33_P3420446 | LOC401387    | Hs.417077 | leucine-rich repeat and death domain-containing protein                                        | Homo sapiens leucine-rich repeat and death domain-containing protein (LOC401387), mRNA [NM_001161528]                                                                     | 1.74873 | up | 2.16440 | up | 28764.96500 | 17032.37700 | 5142.26070 | 2094.98800 | Detected    | Detected    | Detected    | Detected    |
| 3767 | A_33_P3762733 | D21S2088E    | Hs.145622 | D21S2088E                                                                                      | Homo sapiens D21S2088E mRNA sequence [AY063451]                                                                                                                           | 1.74815 | up | 2.00181 | up | 643.01970   | 380.87115   | 235.03299  | 103.53149  | Detected    | Detected    | Detected    | Detected    |
| 3768 | A_24_P194688  | EFHA2        | Hs.403594 | EF-hand domain family, member A2                                                               | Homo sapiens EF-hand domain family, member A2 (EFHA2), mRNA [NM_181723]                                                                                                   | 1.74760 | up | 2.08076 | up | 494.04797   | 292.72580   | 379.82123  | 160.96153  | Detected    | Detected    | Detected    | Detected    |
| 3769 | A_33_P3343467 | FLJ35390     |           | hypothetical LOC255031                                                                         | Homo sapiens hypothetical LOC255031 (FLJ35390), transcript variant 1, non-coding RNA [NR_024416]                                                                          | 1.74538 | up | 2.39588 | up | 121.47746   | 72.06722    | 97.39436   | 35.84551   | Detected    | Detected    | Detected    | Detected    |
| 3770 | A_33_P3354975 | MTMR9L       | Hs.471067 | myotubularin related protein 9-like                                                            | Homo sapiens myotubularin related protein 9-like (MTMR9L), non-coding RNA [NR_026850]                                                                                     | 1.74192 | up | 2.17329 | up | 179.48122   | 106.69001   | 142.47010  | 57.80582   | Detected    | Detected    | Detected    | Detected    |
| 3771 | A_23_P413285  | CC2D2A       | Hs.590928 | coiled-coil and C2 domain containing 2A                                                        | Homo sapiens coiled-coil and C2 domain containing 2A (CC2D2A), transcript variant 1, mRNA [NM_001080522]                                                                  | 1.73967 | up | 2.08082 | up | 210.98009   | 125.57658   | 116.42557  | 49.33785   | Detected    | Detected    | Detected    | Detected    |

|      |               |              |           |                                                                                                           |                                                                                                                                                   |         |    |         |    |              |              |             |            |          |             |             |             |
|------|---------------|--------------|-----------|-----------------------------------------------------------------------------------------------------------|---------------------------------------------------------------------------------------------------------------------------------------------------|---------|----|---------|----|--------------|--------------|-------------|------------|----------|-------------|-------------|-------------|
| 3772 | A_33_P3243332 | FLJ32810     | Hs.269837 | Rho-type GTPase-activating protein FLJ32810                                                               | Homo sapiens Rho-type GTPase-activating protein FLJ32810 (FLJ32810), mRNA [NM_152432]                                                             | 1.73303 | up | 3.03212 | up | 25.30957     | 15.12208     | 13.05708    | 3.79721    | Detected | Compromised | Compromised | Compromised |
| 3773 | A_33_P3297545 |              |           |                                                                                                           | Putative uncharacterized protein ENSP00000374899 [Source:UniProtKB/TrEMBL;Acc:G6NME7] [ENST00000390316]                                           | 1.73235 | up | 2.63547 | up | 452.83290    | 270.66638    | 19.83942    | 6.63800    | Detected | Detected    | Detected    | Compromised |
| 3774 | A_32_P199767  | ZNF630       | Hs.650883 | zinc finger protein 630                                                                                   | Homo sapiens zinc finger protein 630 (ZNF630), mRNA [NM_001037735]                                                                                | 1.72953 | up | 2.51972 | up | 65.58949     | 39.26794     | 50.60721    | 17.71032   | Detected | Detected    | Detected    | Detected    |
| 3775 | A_24_P48408   | RNMT         | Hs.592347 | RNA (guanine-7-) methyltransferase                                                                        | Homo sapiens RNA (guanine-7-) methyltransferase (RNMT), mRNA [NM_003799]                                                                          | 1.72908 | up | 2.04250 | up | 650.58100    | 389.60062    | 266.60596   | 115.09921  | Detected | Detected    | Detected    | Detected    |
| 3776 | A_33_P3379669 | RNF208       | Hs.512767 | ring finger protein 208                                                                                   | Homo sapiens ring finger protein 208 (RNF208), mRNA [NM_031297]                                                                                   | 1.72306 | up | 2.46590 | up | 207.12746    | 124.47173    | 138.47227   | 49.51682   | Detected | Detected    | Detected    | Detected    |
| 3777 | A_33_P3358855 |              |           |                                                                                                           |                                                                                                                                                   | 1.72030 | up | 2.00002 | up | 18.34070     | 11.03936     | 14.47940    | 6.38385    | Detected | Compromised | Detected    | Compromised |
| 3778 | A_23_P390621  | PACRGL       | Hs.479298 | PARK2 co-regulated-like                                                                                   | Homo sapiens PARK2 co-regulated-like (PACRGL), transcript variant 1, mRNA [NM_145048]                                                             | 1.71972 | up | 2.53857 | up | 170.51709    | 102.66970    | 100.92523   | 35.05710   | Detected | Detected    | Detected    | Detected    |
| 3779 | A_32_P89352   | MACROD2      | Hs.661576 | MACRO domain containing 2                                                                                 | Homo sapiens MACRO domain containing 2 (MACROD2), transcript variant 1, mRNA [NM_080676]                                                          | 1.71835 | up | 4.19747 | up | 117.07202    | 70.54652     | 68.29511    | 14.34720   | Detected | Detected    | Detected    | Detected    |
| 3780 | A_33_P3214463 | MESP2        | Hs.37311  | mesoderm posterior 2 homolog (mouse)                                                                      | Homo sapiens mesoderm posterior 2 homolog (mouse) (MESP2), mRNA [NM_001039958]                                                                    | 1.71779 | up | 2.77923 | up | 1118.79900   | 674.39740    | 583.84930   | 185.24268  | Detected | Detected    | Detected    | Detected    |
| 3781 | A_33_P3273230 | HORMAD1      | Hs.298312 | HORMA domain containing 1                                                                                 | Homo sapiens HORMA domain containing 1 (HORMAD1), mRNA [NM_032132]                                                                                | 1.71611 | up | 2.60923 | up | 18.05679     | 10.89505     | 8.61857     | 2.91265    | Detected | Compromised | Compromised | Compromised |
| 3782 | A_23_P420692  | PPFIA4       | Hs.153648 | protein tyrosine phosphatase, receptor type, f polypeptide (PTPRF), interacting protein (liprin), alpha 4 | Homo sapiens protein tyrosine phosphatase, receptor type, f polypeptide (PTPRF), interacting protein (liprin), alpha 4 (PPFIA4), mRNA [NM_015053] | 1.71468 | up | 2.10166 | up | 113.75821    | 68.69614     | 97.69784    | 40.99103   | Detected | Detected    | Detected    | Detected    |
| 3783 | A_33_P3372910 | DDX58        | Hs.190622 | DEAD (Asp-Glu-Ala-Asp) box polypeptide 58                                                                 | Homo sapiens DEAD (Asp-Glu-Ala-Asp) box polypeptide 58 (DDX58), mRNA [NM_014314]                                                                  | 1.71399 | up | 2.24536 | up | 741.36755    | 447.87683    | 633.53754   | 248.80116  | Detected | Detected    | Detected    | Detected    |
| 3784 | A_33_P3240843 | TMEM71       | Hs.293842 | transmembrane protein 71                                                                                  | Homo sapiens transmembrane protein 71 (TMEM71), transcript variant 1, mRNA [NM_144649]                                                            | 1.71359 | up | 2.40176 | up | 51.26101     | 30.97508     | 39.53146    | 14.51369   | Detected | Detected    | Detected    | Detected    |
| 3785 | A_24_P16249   | ZNF479       | Hs.616660 | zinc finger protein 479                                                                                   | Homo sapiens zinc finger protein 479 (ZNF479), mRNA [NM_033273]                                                                                   | 1.71359 | up | 2.11863 | up | 201.85749    | 121.85429    | 7.31414     | 3.04421    | Detected | Detected    | Compromised | Compromised |
| 3786 | A_24_P93948   |              | Hs.151219 |                                                                                                           | Brain my050 protein [Source:UniProtKB/TrEMBL;Acc:G9H3H7] [ENST00000455537]                                                                        | 1.71339 | up | 4.74900 | up | 26.21840     | 15.84463     | 17.36172    | 3.22371    | Detected | Compromised | Detected    | Compromised |
| 3787 | A_33_P3290959 |              |           |                                                                                                           |                                                                                                                                                   | 1.71329 | up | 2.04762 | up | 17.21644     | 10.40508     | 16.95065    | 7.29967    | Detected | Compromised | Detected    | Compromised |
| 3788 | A_33_P3318946 | HAPLN2       | Hs.410719 | hyaluronan and proteoglycan link protein 2                                                                | Homo sapiens hyaluronan and proteoglycan link protein 2 (HAPLN2), mRNA [NM_021817]                                                                | 1.71295 | up | 4.41032 | up | 297.76727    | 179.99692    | 181.40578   | 36.26995   | Detected | Detected    | Detected    | Detected    |
| 3789 | A_23_P150325  | TMEM133      | Hs.44004  | transmembrane protein 133                                                                                 | Homo sapiens transmembrane protein 133 (TMEM133), mRNA [NM_032021]                                                                                | 1.70967 | up | 2.03504 | up | 86.32243     | 52.28108     | 59.60612    | 25.82756   | Detected | Detected    | Detected    | Detected    |
| 3790 | A_24_P98161   | KRIT1        | Hs.531987 | KRIT1, ankyrin repeat containing                                                                          | Homo sapiens KRIT1, ankyrin repeat containing (KRIT1), transcript variant 4, mRNA [NM_194455]                                                     | 1.70952 | up | 2.29023 | up | 63.98581     | 38.75643     | 32.40662    | 12.47729   | Detected | Detected    | Detected    | Compromised |
| 3791 | A_32_P112623  | LOC100293193 | Hs.567050 | hypothetical LOC100293193                                                                                 | PREDICTED: Homo sapiens hypothetical LOC100293193 (LOC100293193), miscRNA [XR_079078]                                                             | 1.70901 | up | 2.21482 | up | 292.14856    | 177.00813    | 290.27840   | 115.56918  | Detected | Detected    | Detected    | Detected    |
| 3792 | A_32_P143000  | FAM189A1     | Hs.383564 | family with sequence similarity 189, member A1                                                            | Homo sapiens family with sequence similarity 189, member A1 (FAM189A1), mRNA [NM_015307]                                                          | 1.70871 | up | 2.24484 | up | 25.96095     | 15.73206     | 36.01842    | 14.14829   | Detected | Detected    | Detected    | Detected    |
| 3793 | A_23_P327140  | RNF213       | Hs.195642 | ring finger protein 213                                                                                   | Homo sapiens ring finger protein 213 (RNF213), transcript variant 1, mRNA [NM_020914]                                                             | 1.70791 | up | 2.90311 | up | 76.05743     | 46.11150     | 57.25914    | 17.39189   | Detected | Detected    | Detected    | Detected    |
| 3794 | A_24_P350576  | TNIK         | Hs.34024  | TRAF2 and NCK interacting kinase                                                                          | Homo sapiens TRAF2 and NCK interacting kinase (TNIK), transcript variant 1, mRNA [NM_015028]                                                      | 1.70750 | up | 3.77760 | up | 27.35193     | 16.58675     | 31.07539    | 7.25381    | Detected | Compromised | Detected    | Compromised |
| 3795 | A_33_P3729375 | LOC285181    | Hs.434525 | hypothetical protein LOC285181                                                                            | Homo sapiens cDNA FLJ36538 fis, clone TRACH2005159 [AK093857]                                                                                     | 1.70744 | up | 3.44308 | up | 25.51500     | 15.47332     | 21.30414    | 5.45610    | Detected | Compromised | Detected    | Compromised |
| 3796 | A_33_P3345936 | CDC9         | Hs.227782 | coiled-coil domain containing 9                                                                           | Homo sapiens coiled-coil domain containing 9 (CDC9), mRNA [NM_015603]                                                                             | 1.70692 | up | 2.09514 | up | 58668.54700  | 35589.77000  | 14873.05700 | 6259.69000 | Detected | Detected    | Detected    | Detected    |
| 3797 | A_23_P89973   | BRSK1        | Hs.182081 | BR serine/threonine kinase 1                                                                              | Homo sapiens BR serine/threonine kinase 1 (BRSK1), mRNA [NM_032430]                                                                               | 1.70331 | up | 2.44338 | up | 79.18384     | 48.13672     | 43.91546    | 15.84864   | Detected | Detected    | Detected    | Detected    |
| 3798 | A_33_P3231262 | LOC257396    | Hs.12326  | hypothetical protein LOC257396                                                                            | Homo sapiens hypothetical protein LOC257396, mRNA (cDNA clone IMAGE529656) [BC041894]                                                             | 1.70290 | up | 2.48930 | up | 45.82232     | 27.86262     | 58.10454    | 20.58250   | Detected | Detected    | Detected    | Detected    |
| 3799 | A_33_P3602006 | ADAT2        | Hs.709561 | adenosine deaminase, tRNA-specific 2, TAD2 homolog (S. cerevisiae)                                        | Homo sapiens adenosine deaminase, tRNA-specific 2, TAD2 homolog (S. cerevisiae) (ADAT2), mRNA [NM_182503]                                         | 1.69857 | up | 2.19879 | up | 46855.20300  | 28563.17000  | 10441.96300 | 4187.58640 | Detected | Detected    | Detected    | Detected    |
| 3800 | A_24_P838448  | FLJ22536     | Hs.719939 | hypothetical locus LOC401237                                                                              | Homo sapiens hypothetical locus LOC401237 (FLJ22536), non-coding RNA [NR_015410]                                                                  | 1.69496 | up | 2.24761 | up | 64.44888     | 39.37206     | 31.48826    | 12.35361   | Detected | Detected    | Detected    | Compromised |
| 3801 | A_33_P3320538 |              | Hs.594723 |                                                                                                           | Nucleoporin p58/p45 (Nucleoporin-like 1) [Source:UniProtKB/Swiss-Prot;Acc:Q9BVL2] [ENST00000381747]                                               | 1.69472 | up | 2.12613 | up | 1382.91650   | 844.94824    | 1052.80380  | 436.63867  | Detected | Detected    | Detected    | Detected    |
| 3802 | A_24_P522631  | TMEM201      | Hs.632365 | transmembrane protein 201                                                                                 | Homo sapiens transmembrane protein 201 (TMEM201), transcript variant 1, mRNA [NM_001130924]                                                       | 1.69371 | up | 2.06948 | up | 10622.69800  | 6494.24700   | 1706.45970  | 727.10960  | Detected | Detected    | Detected    | Detected    |
| 3803 | A_33_P3667484 | LOC648740    | Hs.721681 | ACTB pseudogene                                                                                           | Homo sapiens ACTB pseudogene (LOC648740), non-coding RNA [NR_024438]                                                                              | 1.69211 | up | 7.75259 | up | 180685.05000 | 110567.23000 | 39458.83200 | 4488.10350 | Detected | Detected    | Detected    | Detected    |



|      |               |              |           |                                                                                                |                                                                                                                                                              |         |    |         |    |             |             |            |            |          |             |             |             |
|------|---------------|--------------|-----------|------------------------------------------------------------------------------------------------|--------------------------------------------------------------------------------------------------------------------------------------------------------------|---------|----|---------|----|-------------|-------------|------------|------------|----------|-------------|-------------|-------------|
| 3804 | A_24_P208998  | TRIM23       | Hs.792    | tripartite motif-containing 23                                                                 | Homo sapiens tripartite motif-containing 23 (TRIM23), transcript variant alpha, mRNA [NM_001656]                                                             | 1.69178 | up | 2.02192 | up | 412.38010   | 252.39873   | 152.73370  | 66.60967   | Detected | Detected    | Detected    | Detected    |
| 3805 | A_24_P450285  | CDC153       | Hs.114777 | coiled-coil domain containing 153                                                              | Homo sapiens coiled-coil domain containing 153 (CDC153), mRNA [NM_001145018]                                                                                 | 1.68859 | up | 2.30247 | up | 57.86245    | 35.48187    | 110.02483  | 42.13683   | Detected | Detected    | Detected    | Detected    |
| 3806 | A_33_P3230583 | LOC283788    | Hs.657131 | FSHD region gene 1 pseudogene                                                                  | Homo sapiens FSHD region gene 1 pseudogene (LOC283788), non-coding RNA [NR_027436]                                                                           | 1.68742 | up | 2.28508 | up | 524.74260   | 321.99990   | 100.67909  | 38.85116   | Detected | Detected    | Detected    | Detected    |
| 3807 | A_32_P122226  | AMDHD1       | Hs.424907 | amidohydrolase domain containing 1                                                             | Homo sapiens amidohydrolase domain containing 1 (AMDHD1), mRNA [NM_152435]                                                                                   | 1.68504 | up | 3.47911 | up | 57.95345    | 35.61238    | 33.83199   | 8.57481    | Detected | Detected    | Detected    | Compromised |
| 3808 | A_33_P3235454 |              |           |                                                                                                |                                                                                                                                                              | 1.68382 | up | 2.27957 | up | 11711.36900 | 7201.85940  | 508.86542  | 196.84091  | Detected | Detected    | Detected    | Detected    |
| 3809 | A_33_P3280993 | HCG18        |           | HLA complex group 18                                                                           | Homo sapiens HLA complex group 18 (HCG18), non-coding RNA [NR_024052]                                                                                        | 1.68343 | up | 2.35365 | up | 763.19690   | 469.43530   | 312.27237  | 116.99238  | Detected | Detected    | Detected    | Detected    |
| 3810 | A_33_P3400057 | TCEANC       | Hs.222855 | transcription elongation factor A (SID) N-terminal and central domain containing               | Homo sapiens transcription elongation factor A (SID) N-terminal and central domain containing (TCEANC), mRNA [NM_152634]                                     | 1.68315 | up | 2.05859 | up | 19.65783    | 12.09330    | 15.76408   | 6.75250    | Detected | Compromised | Compromised | Compromised |
| 3811 | A_33_P3314212 | PARG         | Hs.536158 | poly (ADP-ribose) glycohydrolase                                                               | Homo sapiens poly (ADP-ribose) glycohydrolase (PARG), mRNA [NM_003631]                                                                                       | 1.68262 | up | 2.41064 | up | 41.63915    | 25.62411    | 41.40062   | 15.14398   | Detected | Detected    | Detected    | Compromised |
| 3812 | A_24_P4877    | ZCRB1        | Hs.496279 | zinc finger CCHC-type and RNA binding motif 1                                                  | Homo sapiens zinc finger CCHC-type and RNA binding motif 1 (ZCRB1), mRNA [NM_033114]                                                                         | 1.68076 | up | 2.07771 | up | 2561.57930  | 1578.09890  | 1349.87060 | 572.89330  | Detected | Detected    | Detected    | Detected    |
| 3813 | A_33_P3398401 | CRBN         | Hs.18925  | cereblin                                                                                       | Homo sapiens cereblin (CRBN), mRNA [NM_016302]                                                                                                               | 1.67979 | up | 2.13860 | up | 6522.01700  | 4020.31300  | 6038.29300 | 2489.71500 | Detected | Detected    | Detected    | Detected    |
| 3814 | A_33_P3349002 |              |           |                                                                                                |                                                                                                                                                              | 1.67850 | up | 2.09838 | up | 40.36343    | 24.89996    | 31.01936   | 13.03507   | Detected | Detected    | Detected    | Compromised |
| 3815 | A_33_P3300600 | OR7G1        | Hs.553576 | olfactory receptor, family 7, subfamily G, member 1                                            | Homo sapiens olfactory receptor, family 7, subfamily G, member 1 (OR7G1), mRNA [NM_001005192]                                                                | 1.67688 | up | 2.46141 | up | 11.47180    | 7.08373     | 10.11555   | 3.62386    | Detected | Compromised | Compromised | Compromised |
| 3816 | A_24_P233944  | CEPT1        | Hs.363572 | choline/ethanolamine phosphotransferase 1                                                      | Homo sapiens choline/ethanolamine phosphotransferase 1 (CEPT1), transcript variant 2, mRNA [NM_01007794]                                                     | 1.67530 | up | 2.02332 | up | 156.97133   | 97.02003    | 168.87173  | 73.59670   | Detected | Detected    | Detected    | Detected    |
| 3817 | A_24_P62783   | FABP3        | Hs.657242 | fatty acid binding protein 3, muscle and heart (mammary-derived growth inhibitor)              | Homo sapiens fatty acid binding protein 3, muscle and heart (mammary-derived growth inhibitor) (FABP3), mRNA [NM_004102]                                     | 1.67503 | up | 2.50447 | up | 53.91497    | 33.32879    | 56.31842   | 19.82895   | Detected | Detected    | Detected    | Detected    |
| 3818 | A_23_P72651   | ECSOR        | Hs.483538 | endothelial cell-specific chemotaxis regulator                                                 | Homo sapiens endothelial cell-specific chemotaxis regulator (ECSOR), mRNA [NM_001077693]                                                                     | 1.67315 | up | 2.36779 | up | 76.42336    | 47.29586    | 64.63166   | 24.06958   | Detected | Detected    | Detected    | Detected    |
| 3819 | A_33_P3209162 | APOC4        | Hs.655423 | apolipoprotein C-IV                                                                            | Homo sapiens apolipoprotein C-IV (APOC4), mRNA [NM_001646]                                                                                                   | 1.67230 | up | 2.53413 | up | 84.61167    | 52.39004    | 71.81342   | 24.98857   | Detected | Detected    | Detected    | Detected    |
| 3820 | A_33_P3300740 | LOC100128071 | Hs.660539 | similar to HCG41624                                                                            | PREDICTED: Homo sapiens similar to HCG41624 (LOC100128071), mRNA [XM_001724939]                                                                              | 1.67144 | up | 3.60706 | up | 21.02881    | 13.02736    | 11.46088   | 2.80175    | Detected | Compromised | Compromised | Compromised |
| 3821 | A_23_P321034  | INADL        | Hs.478125 | InaD-like (Drosophila)                                                                         | Homo sapiens InaD-like (Drosophila) (INADL), mRNA [NM_176977]                                                                                                | 1.66919 | up | 4.33948 | up | 21.48222    | 13.32619    | 14.34168   | 2.91426    | Detected | Compromised | Detected    | Compromised |
| 3822 | A_24_P412734  | PRSS36       | Hs.256632 | protease, serine, 36                                                                           | Homo sapiens protease, serine, 36 (PRSS36), mRNA [NM_173502]                                                                                                 | 1.66838 | up | 2.09133 | up | 25013.10200 | 15524.10200 | 5460.73630 | 2302.46630 | Detected | Detected    | Detected    | Detected    |
| 3823 | A_33_P3265030 | SEPT5        | Hs.283743 | seplin 5                                                                                       | Homo sapiens septin 5 (SEPT5), mRNA [NM_002688]                                                                                                              | 1.66714 | up | 2.09701 | up | 7704.13400  | 4785.02540  | 6248.41200 | 2627.45500 | Detected | Detected    | Detected    | Detected    |
| 3824 | A_23_P43846   | FABP6        | Hs.519719 | fatty acid binding protein 6, ileal                                                            | Homo sapiens fatty acid binding protein 6, ileal (FABP6), transcript variant 1, mRNA [NM_001040442]                                                          | 1.66580 | up | 2.17809 | up | 26.45552    | 16.44474    | 21.28001   | 8.61514    | Detected | Detected    | Detected    | Compromised |
| 3825 | A_24_P63347   | PF4V1        | Hs.72933  | platelet factor 4 variant 1                                                                    | Homo sapiens platelet factor 4 variant 1 (PF4V1), mRNA [NM_002620]                                                                                           | 1.66529 | up | 2.01953 | up | 73.49332    | 45.69723    | 54.37374   | 23.74132   | Detected | Detected    | Detected    | Detected    |
| 3826 | A_23_P32175   | LHX6         | Hs.103137 | LIM homeobox 6                                                                                 | Homo sapiens LIM homeobox 6 (LHX6), transcript variant 1, mRNA [NM_014368]                                                                                   | 1.66492 | up | 2.21011 | up | 106.70690   | 66.36388    | 112.37116  | 44.83385   | Detected | Detected    | Detected    | Detected    |
| 3827 | A_23_P109072  | SALL4        | Hs.517113 | sal-like 4 (Drosophila)                                                                        | Homo sapiens sal-like 4 (Drosophila) (SALL4), mRNA [NM_020436]                                                                                               | 1.66429 | up | 2.05913 | up | 57.44106    | 35.73766    | 44.71793   | 19.14973   | Detected | Detected    | Detected    | Detected    |
| 3828 | A_23_P501822  | JUP          | Hs.514174 | junction plakoglobin                                                                           | Homo sapiens junction plakoglobin (JUP), transcript variant 1, mRNA [NM_002230]                                                                              | 1.66286 | up | 2.08053 | up | 216.02950   | 134.52110   | 285.81058  | 121.13493  | Detected | Detected    | Detected    | Detected    |
| 3829 | A_33_P3881056 | LOC100128567 | Hs.676722 | hypothetical protein LOC100128567                                                              | Homo sapiens cDNA FLJ27128 fis. clone SPL07659, [AK130638]                                                                                                   | 1.66266 | up | 2.30427 | up | 187.03110   | 116.47822   | 120.07949  | 45.95160   | Detected | Detected    | Detected    | Detected    |
| 3830 | A_23_P357546  | PNKD         | Hs.98475  | paroxysmal nonkinesigenic dyskinesia                                                           | Homo sapiens paroxysmal nonkinesigenic dyskinesia (PNKD), transcript variant 1, mRNA [NM_015488]                                                             | 1.66245 | up | 2.81169 | up | 74.47138    | 46.38449    | 66.78574   | 20.94506   | Detected | Detected    | Detected    | Detected    |
| 3831 | A_23_P110445  | APBB3        | Hs.529449 | amyloid beta (A4) precursor protein-binding, family B, member 3                                | Homo sapiens amyloid beta (A4) precursor protein-binding, family B, member 3 (APBB3), transcript variant 4, mRNA [NM_006061]                                 | 1.66042 | up | 2.03634 | up | 477.55396   | 297.80942   | 394.38757  | 170.78038  | Detected | Detected    | Detected    | Detected    |
| 3832 | A_24_P316019  |              | Hs.525905 |                                                                                                | Putative gelsin subfamily A member 6-like protein 11 [Source:UniProtKB/Swiss-Prot;Acc:A6NCC3] [ENST00000333156]                                              | 1.65718 | up | 2.30762 | up | 79.30138    | 49.55001    | 38.29055   | 14.63163   | Detected | Detected    | Detected    | Detected    |
| 3833 | A_33_P3251771 | CYLD         | Hs.578973 | cylindromatosis (turban tumor syndrome)                                                        | Homo sapiens cylindromatosis (turban tumor syndrome) (CYLD), transcript variant 1, mRNA [NM_015247]                                                          | 1.65428 | up | 2.05384 | up | 2187.48070  | 1369.20760  | 933.60144  | 400.82950  | Detected | Detected    | Detected    | Detected    |
| 3834 | A_33_P3281905 | LOC100144604 | Hs.245476 | hypothetical LOC100144604                                                                      | Homo sapiens hypothetical LOC100144604 (LOC100144604), non-coding RNA [NR_021493]                                                                            | 1.65354 | up | 3.28862 | up | 2244.68380  | 1405.63800  | 1575.67850 | 422.49340  | Detected | Detected    | Detected    | Detected    |
| 3835 | A_23_P252462  | GALNT9       | Hs.301062 | UDP-N-acetyl-alpha-D-galactosamine:polypeptide N-acetylgalactosaminyltransferase 9 (GalNAc-T9) | Homo sapiens UDP-N-acetyl-alpha-D-galactosamine:polypeptide N-acetylgalactosaminyltransferase 9 (GalNAc-T9) (GALNT9), transcript variant B, mRNA [NM_021808] | 1.64796 | up | 2.45011 | up | 65.68143    | 41.26957    | 59.68341   | 21.47998   | Detected | Detected    | Detected    | Detected    |

|      |               |              |           |                                                                                    |                                                                                                                            |         |    |         |             |             |            |            |             |             |             |             |
|------|---------------|--------------|-----------|------------------------------------------------------------------------------------|----------------------------------------------------------------------------------------------------------------------------|---------|----|---------|-------------|-------------|------------|------------|-------------|-------------|-------------|-------------|
| 3836 | A_33_P3231908 | POU3F3       | Hs.673855 | POU class 3 homeobox 3                                                             | Homo sapiens POU class 3 homeobox 3 (POU3F3), mRNA [NM_006236]                                                             | 1.64635 | up | 3.51000 | 11.94260    | 7.51123     | 20.20154   | 5.07508    | Compromised | Compromised | Detected    | Compromised |
| 3837 | A_33_P3580508 | C14orf26     | Hs.660501 | chromosome 14 open reading frame 26                                                | Homo sapiens cDNA FLJ43967 fis. clone TEST14017254 [AK125955]                                                              | 1.64626 | up | 2.19025 | 78.10838    | 49.12834    | 47.18171   | 18.99527   | Detected    | Detected    | Detected    | Detected    |
| 3838 | A_33_P3330404 | FAM180B      | Hs.502529 | family with sequence similarity 180, member B                                      | Homo sapiens family with sequence similarity 180, member B (FAM180B), mRNA [NM_001164379]                                  | 1.64411 | up | 3.49904 | 611.92206   | 385.38780   | 375.26685  | 94.57062   | Detected    | Detected    | Detected    | Detected    |
| 3839 | A_23_P99996   | MAGEL2       | Hs.141496 | MAGE-like 2                                                                        | Homo sapiens MAGE-like 2 (MAGEL2), mRNA [NM_019066]                                                                        | 1.64390 | up | 7.10904 | 414.38010   | 261.01044   | 240.16590  | 29.78970   | Detected    | Detected    | Detected    | Detected    |
| 3840 | A_23_P416314  | HRASLS5      | Hs.410316 | HRAS-like suppressor family, member 5                                              | Homo sapiens HRAS-like suppressor family, member 5 (HRASLS5), transcript variant 1, mRNA [NM_054108]                       | 1.64347 | up | 2.85093 | 31345.61500 | 19749.08000 | 3636.43260 | 1124.74460 | Detected    | Detected    | Detected    | Detected    |
| 3841 | A_24_P254084  | ZNF69        | Hs.661955 | zinc finger protein 69                                                             | Homo sapiens zinc finger protein 69 (ZNF69), mRNA [NM_021915]                                                              | 1.64071 | up | 2.52322 | 36.58919    | 23.09166    | 27.05395   | 9.45454    | Detected    | Detected    | Detected    | Compromised |
| 3842 | A_23_P397455  | ACVR1C       | Hs.562901 | activin A receptor, type IC                                                        | Homo sapiens activin A receptor, type IC (ACVR1C), transcript variant 1, mRNA [NM_145259]                                  | 1.63552 | up | 2.18674 | 28.49515    | 18.04053    | 24.13396   | 9.73190    | Detected    | Compromised | Detected    | Compromised |
| 3843 | A_33_P3390868 | SYNPO2       | Hs.655519 | synaptopodin 2                                                                     | Homo sapiens synaptopodin 2 (SYNPO2), transcript variant 1, mRNA [NM_133477]                                               | 1.63456 | up | 2.08876 | 25.57292    | 16.19988    | 34.62911   | 14.61900   | Detected    | Compromised | Detected    | Detected    |
| 3844 | A_32_P162187  | C2           | Hs.408903 | complement component 2                                                             | Homo sapiens complement component 2 (C2), transcript variant 1, mRNA [NM_000653]                                           | 1.62818 | up | 2.20433 | 467.02264   | 297.00885   | 202.34730  | 80.94431   | Detected    | Detected    | Detected    | Detected    |
| 3845 | A_33_P3502311 | HERC2P7      | Hs.722631 | hect domain and RLD 2 pseudogene 7                                                 | Homo sapiens cDNA FLJ43661 fis. clone SYNGW4004914 [AK125649]                                                              | 1.62750 | up | 2.40862 | 185.14413   | 117.79369   | 152.24180  | 55.73543   | Detected    | Detected    | Detected    | Detected    |
| 3846 | A_23_P84448   | TUBA4A       | Hs.75318  | tubulin, alpha 4a                                                                  | Homo sapiens tubulin, alpha 4a (TUBA4A), mRNA [NM_006000]                                                                  | 1.62697 | up | 2.18096 | 3445.81030  | 2193.02880  | 4222.82280 | 1707.34200 | Detected    | Detected    | Detected    | Detected    |
| 3847 | A_33_P3262794 | ZNF280D      | Hs.511477 | zinc finger protein 280D                                                           | Homo sapiens zinc finger protein 280D (ZNF280D), transcript variant 1, mRNA [NM_017661]                                    | 1.62661 | up | 2.32915 | 22.71745    | 14.46137    | 16.95596   | 6.41934    | Detected    | Compromised | Detected    | Compromised |
| 3848 | A_33_P3382887 | hCG_1659830  |           | hCG_1659830                                                                        | PREDICTED: Homo sapiens hCG1659830 (LOC728111), mRNA [XM_001714799]                                                        | 1.62262 | up | 2.21432 | 33102.01000 | 21123.70500 | 6651.83350 | 2648.90870 | Detected    | Detected    | Detected    | Detected    |
| 3849 | A_23_P87982   | ATP12A       | Hs.147111 | ATPase, H <sup>+</sup> /K <sup>+</sup> transporting, nongastric, alpha polypeptide | Homo sapiens ATPase, H <sup>+</sup> /K <sup>+</sup> transporting, nongastric, alpha polypeptide (ATP12A), mRNA [NM_001676] | 1.61740 | up | 2.65776 | 16.11892    | 10.31931    | 7.84991    | 2.60445    | Detected    | Compromised | Compromised | Compromised |
| 3850 | A_33_P3354881 |              |           |                                                                                    |                                                                                                                            | 1.61620 | up | 2.31917 | 210.54735   | 134.89243   | 280.93030  | 106.81499  | Detected    | Detected    | Detected    | Detected    |
| 3851 | A_24_P369898  |              |           |                                                                                    | Putative myosin-XVB (Unconventional myosin-15B) (Myosin XVBP) [Source:UniProtKB/Swiss-Prot; Acc:Q96JP2] [ENST00000293201]  | 1.61561 | up | 2.45288 | 97.56057    | 62.52729    | 73.18980   | 26.31119   | Detected    | Detected    | Detected    | Detected    |
| 3852 | A_24_P15586   | THAP5        | Hs.707689 | THAP domain containing 5                                                           | Homo sapiens THAP domain containing 5 (THAP5), transcript variant 2, mRNA [NM_162529]                                      | 1.61460 | up | 2.00376 | 115.08041   | 73.80212    | 31.44569   | 13.83827   | Detected    | Detected    | Detected    | Detected    |
| 3853 | A_33_P3250750 | LOC100130711 | Hs.719173 | similar to hCG1778032                                                              | PREDICTED: Homo sapiens similar to hCG1778032 (LOC100130711), mRNA [XM_001720695]                                          | 1.61399 | up | 2.11817 | 3303.07130  | 2119.09200  | 749.35730  | 311.95670  | Detected    | Detected    | Detected    | Detected    |
| 3854 | A_33_P3418321 |              |           |                                                                                    |                                                                                                                            | 1.61062 | up | 2.99542 | 13.76204    | 8.84757     | 9.09398    | 2.67341    | Detected    | Compromised | Compromised | Compromised |
| 3855 | A_23_P429581  | TMEM67       | Hs.116240 | transmembrane protein 67                                                           | Homo sapiens transmembrane protein 67 (TMEM67), transcript variant 1, mRNA [NM_153704]                                     | 1.60961 | up | 2.46555 | 47.64972    | 30.65307    | 37.87642   | 13.54631   | Detected    | Detected    | Detected    | Compromised |
| 3856 | A_33_P3324655 | C8orf41      | Hs.77135  | chromosome 8 open reading frame 41                                                 | Homo sapiens chromosome 8 open reading frame 41 (C8orf41), transcript variant 2, mRNA [NM_025115]                          | 1.60671 | up | 2.60463 | 86.65222    | 55.84383    | 48.84072   | 16.53488   | Detected    | Detected    | Detected    | Detected    |
| 3857 | A_32_P144342  | PARP4        | Hs.117825 | poly (ADP-ribose) polymerase family, member 4                                      | Homo sapiens poly (ADP-ribose) polymerase family, member 4 (PARP4), mRNA [NM_006437]                                       | 1.60623 | up | 2.00534 | 1175.28060  | 757.64900   | 137.02680  | 60.25371   | Detected    | Detected    | Detected    | Detected    |
| 3858 | A_33_P3343210 | SLC25A37     | Hs.716436 | solute carrier family 25, member 37                                                | Homo sapiens solute carrier family 25, member 37 (SLC25A37), nuclear gene encoding mitochondrial protein, mRNA [NM_016612] | 1.60596 | up | 2.01946 | 1401.65730  | 903.73413   | 1073.36670 | 468.68280  | Detected    | Detected    | Detected    | Detected    |
| 3859 | A_24_P153511  | OSBPL8       | Hs.430849 | oxysterol binding protein-like 8                                                   | Homo sapiens oxysterol binding protein-like 8 (OSBPL8), transcript variant 1, mRNA [NM_020841]                             | 1.60448 | up | 2.17028 | 465.02148   | 300.10437   | 375.45840  | 152.54987  | Detected    | Detected    | Detected    | Detected    |
| 3860 | A_23_P103328  | PTGER3       | Hs.445000 | prostaglandin E receptor 3 (subtype EP3)                                           | Homo sapiens prostaglandin E receptor 3 (subtype EP3) (PTGER3), transcript variant 4, mRNA [NM_198714]                     | 1.60343 | up | 2.04238 | 196.13907   | 126.66221   | 125.51521  | 54.19088   | Detected    | Detected    | Detected    | Detected    |
| 3861 | A_33_P3260066 | BEAN         | Hs.97805  | brain expressed, associated with Nedd4                                             | Homo sapiens brain expressed, associated with Nedd4 (BEAN), mRNA [NM_001138106]                                            | 1.60091 | up | 2.47169 | 362.66074   | 234.56635   | 279.90543  | 99.85780   | Detected    | Detected    | Detected    | Detected    |
| 3862 | A_32_P468743  | ODF3L1       | Hs.144348 | outer dense fiber of sperm tails 3-like 1                                          | Homo sapiens outer dense fiber of sperm tails 3-like 1 (ODF3L1), mRNA [NM_175881]                                          | 1.59887 | up | 2.79845 | 13.19396    | 8.54469     | 8.42982    | 2.65624    | Detected    | Compromised | Compromised | Compromised |
| 3863 | A_23_P55917   | SYT3         | Hs.515554 | synaptotagmin III                                                                  | Homo sapiens synaptotagmin III (SYT3), transcript variant 1, mRNA [NM_032298]                                              | 1.59821 | up | 2.33009 | 146.81276   | 95.11808    | 124.22932  | 47.01292   | Detected    | Detected    | Detected    | Detected    |
| 3864 | A_23_P5002    | MAP4K1       | Hs.95424  | mitogen-activated protein kinase kinase kinase 1                                   | Homo sapiens mitogen-activated protein kinase kinase kinase 1 (MAP4K1), transcript variant 1, mRNA [NM_001042600]          | 1.59668 | up | 3.63038 | 79.58189    | 51.60943    | 40.78280   | 9.90581    | Detected    | Detected    | Detected    | Compromised |
| 3865 | A_33_P3305105 | VWA5A        | Hs.152944 | von Willebrand factor A domain containing 5A                                       | Homo sapiens von Willebrand factor A domain containing 5A (VWA5A), transcript variant 2, mRNA [NM_198315]                  | 1.59649 | up | 4.37633 | 207.28683   | 134.44350   | 210.79391  | 42.47305   | Detected    | Detected    | Detected    | Detected    |
| 3866 | A_33_P3374338 | LOC100292758 | Hs.414183 | hypothetical protein LOC100292758                                                  | PREDICTED: Homo sapiens hypothetical protein LOC100292758 (LOC100292758), mRNA [XM_002345774]                              | 1.59627 | up | 3.19282 | 11.39641    | 7.39258     | 15.88357   | 4.38671    | Compromised | Compromised | Detected    | Compromised |
| 3867 | A_33_P3399755 |              |           |                                                                                    |                                                                                                                            | 1.59309 | up | 2.10816 | 7594.20460  | 4935.99400  | 5587.33150 | 2337.04500 | Detected    | Detected    | Detected    | Detected    |

|      |               |              |           |                                                                     |                                                                                                                                                 |         |    |         |    |             |             |             |            |          |             |             |             |
|------|---------------|--------------|-----------|---------------------------------------------------------------------|-------------------------------------------------------------------------------------------------------------------------------------------------|---------|----|---------|----|-------------|-------------|-------------|------------|----------|-------------|-------------|-------------|
| 3868 | A_33_P3408852 | EPHA8        | Hs.283613 | EPH receptor A8                                                     | Homo sapiens EPH receptor A8 (EPHA8), transcript variant 2, mRNA [NM_001006943]                                                                 | 1.59305 | up | 2.12767 | up | 51.36903    | 33.38908    | 96.54698    | 40.01289   | Detected | Detected    | Detected    | Detected    |
| 3869 | A_33_P3414683 | KIFC2        | Hs.528713 | kinesin family member C2                                            | Homo sapiens kinesin family member C2 (KIFC2), mRNA [NM_145754]                                                                                 | 1.58850 | up | 3.13362 | up | 87.21989    | 56.85388    | 47.76035    | 13.43961   | Detected | Detected    | Detected    | Compromised |
| 3870 | A_24_P841677  | CXorf23      | Hs.28896  | chromosome X open reading frame 23                                  | Homo sapiens chromosome X open reading frame 23 (CXorf23), mRNA [NM_198279]                                                                     | 1.58608 | up | 2.07867 | up | 60.22088    | 39.31460    | 29.43163    | 12.48519   | Detected | Detected    | Detected    | Compromised |
| 3871 | A_23_P76071   | B3GNT4       | Hs.363315 | UDP-GlcNAc:betaGal beta-1,3-N-acetylglucosaminyltransferase 4       | Homo sapiens UDP-GlcNAc:betaGal beta-1,3-N-acetylglucosaminyltransferase 4 (B3GNT4), mRNA [NM_030765]                                           | 1.58171 | up | 3.25759 | up | 26.36804    | 17.26171    | 22.88222    | 6.19394    | Detected | Compromised | Detected    | Compromised |
| 3872 | A_33_P3414477 | LOC729739    |           | hypothetical LOC729739                                              | PREDICTED: Homo sapiens hypothetical LOC729739 (LOC729739), miscRNA [XR_016018]                                                                 | 1.57943 | up | 3.06894 | up | 26.10718    | 17.11563    | 11.63925    | 3.34427    | Detected | Detected    | Compromised | Compromised |
| 3873 | A_33_P3626709 | LOC100129280 | Hs.678032 | hypothetical protein LOC100129280                                   | Homo sapiens cDNA FLJ44650 fis, clone BRACE2039607, [AK126613]                                                                                  | 1.57770 | up | 3.08588 | up | 72.66760    | 47.69230    | 34.98270    | 9.99633    | Detected | Detected    | Detected    | Compromised |
| 3874 | A_23_P312132  | ITGAX        | Hs.248472 | integrin, alpha X (complement component 3 receptor 4 subunit)       | Homo sapiens integrin, alpha X (complement component 3 receptor 4 subunit) (ITGAX), mRNA [NM_000867]                                            | 1.57652 | up | 2.20027 | up | 45.72312    | 30.03092    | 22.56578    | 9.04357    | Detected | Detected    | Detected    | Compromised |
| 3875 | A_32_P539599  | FLJ40852     | Hs.17589  | hypothetical LOC285962                                              | Homo sapiens hypothetical LOC285962 (FLJ40852), non-coding RNA [NR_015392]                                                                      | 1.57346 | up | 3.06145 | up | 14.65687    | 9.64538     | 10.73912    | 3.09320    | Detected | Compromised | Compromised | Compromised |
| 3876 | A_24_P411186  | BCL11A       | Hs.370549 | B-cell CLL/lymphoma 11A (zinc finger protein)                       | Homo sapiens B-cell CLL/lymphoma 11A (zinc finger protein) (BCL11A), transcript variant 1, mRNA [NM_022893]                                     | 1.57232 | up | 2.14879 | up | 116.56587   | 76.76495    | 80.73995    | 33.13287   | Detected | Detected    | Detected    | Detected    |
| 3877 | A_33_P3381361 |              |           |                                                                     | Paraplegin (EC 3.4.24.-)(Spastic paraplegia protein 7) [Source:UniProtKB/Swiss-Prot;Acc:Q9UJ00] [ENST00000312632]                               | 1.57187 | up | 2.13615 | up | 130.38264   | 85.88873    | 70.60164    | 29.14394   | Detected | Detected    | Detected    | Detected    |
| 3878 | A_24_P724153  | LOC100130107 | Hs.710718 | hypothetical LOC100130107                                           | PREDICTED: Homo sapiens hypothetical LOC100130107 (LOC100130107), mRNA [XM_001716672]                                                           | 1.57155 | up | 2.09827 | up | 331.54530   | 218.44840   | 471.75443   | 198.25280  | Detected | Detected    | Detected    | Detected    |
| 3879 | A_33_P3365553 | LOC389634    | Hs.647958 | hypothetical LOC389634                                              | Homo sapiens hypothetical LOC389634 (LOC389634), non-coding RNA [NR_024420]                                                                     | 1.57065 | up | 3.79167 | up | 72.88973    | 48.05279    | 122.04389   | 28.38252   | Detected | Detected    | Detected    | Detected    |
| 3880 | A_24_P109887  |              | Hs.375105 |                                                                     | LOC354207 protein [Source:UniProtKB/TrEMBL;Acc:Q8N1B8] [ENST00000320322]                                                                        | 1.56496 | up | 2.21419 | up | 16.97433    | 11.23112    | 12.54624    | 4.99649    | Detected | Compromised | Compromised | Compromised |
| 3881 | A_33_P3220674 |              | Hs.636923 |                                                                     | Novel proteinHCG1981372, isoform CRA cPutative uncharacterized protein ENSP00000370498 ; [Source:UniProtKB/TrEMBL;Acc:A8MSK0] [ENST00000425492] | 1.56399 | up | 2.36105 | up | 95.78862    | 63.41810    | 126.44069   | 47.22224   | Detected | Detected    | Detected    | Detected    |
| 3882 | A_24_P85511   | ANKRD26      | Hs.361041 | ankyrin repeat domain 26                                            | Homo sapiens ankyrin repeat domain 26 (ANKRD26), mRNA [NM_014915]                                                                               | 1.56369 | up | 3.53232 | up | 26.29132    | 17.40988    | 10.54648    | 2.63277    | Detected | Detected    | Compromised | Compromised |
| 3883 | A_33_P3293524 | NEURL        | Hs.703959 | neutralized homolog (Drosophila)                                    | Homo sapiens neutralized homolog (Drosophila) (NEURL), mRNA [NM_004210]                                                                         | 1.56177 | up | 2.26686 | up | 43061.89000 | 28550.18200 | 10704.79900 | 4164.08740 | Detected | Detected    | Detected    | Detected    |
| 3884 | A_23_P338401  | KDM1B        | Hs.709336 | lysine (K)-specific demethylase 1B                                  | Homo sapiens lysine (K)-specific demethylase 1B (KDM1B), mRNA [NM_153042]                                                                       | 1.56093 | up | 2.65316 | up | 12.15473    | 8.06297     | 10.14892    | 3.37304    | Detected | Compromised | Compromised | Compromised |
| 3885 | A_33_P3289113 | COX11        | Hs.591171 | COX11 homolog, cytochrome c oxidase assembly protein (yeast)        | Homo sapiens cDNA FLJ42819 fis, clone BRCAN2015464, [AK124809]                                                                                  | 1.56049 | up | 2.61873 | up | 109.69422   | 72.78736    | 104.10512   | 35.05470   | Detected | Detected    | Detected    | Detected    |
| 3886 | A_23_P160992  | FMO4         | Hs.386502 | flavin containing monooxygenase 4                                   | Homo sapiens flavin containing monooxygenase 4 (FMO4), mRNA [NM_002022]                                                                         | 1.55956 | up | 2.25518 | up | 15.53553    | 10.31473    | 8.46942     | 3.31161    | Detected | Compromised | Compromised | Compromised |
| 3887 | A_33_P3385376 | SYPL2        | Hs.528366 | synaptophysin-like 2                                                | Homo sapiens synaptophysin-like 2 (SYPL2), mRNA [NM_001040709]                                                                                  | 1.55802 | up | 2.14210 | up | 32.13585    | 21.35747    | 14.35209    | 5.90800    | Detected | Detected    | Detected    | Compromised |
| 3888 | A_23_P156993  | CNOT4        | Hs.490224 | CCR4-NOT transcription complex, subunit 4                           | Homo sapiens CCR4-NOT transcription complex, subunit 4 (CNOT4), transcript variant 2, mRNA [NM_001008225]                                       | 1.55711 | up | 2.16884 | up | 41.63683    | 27.68796    | 39.73552    | 16.15536   | Detected | Detected    | Detected    | Detected    |
| 3889 | A_23_P50276   | ANGPTL6      | Hs.712850 | angiotensin-like 6                                                  | Homo sapiens angiotensin-like 6 (ANGPTL6), mRNA [NM_031917]                                                                                     | 1.55416 | up | 2.04293 | up | 120.57459   | 80.33311    | 151.01143   | 65.18100   | Detected | Detected    | Detected    | Detected    |
| 3890 | A_33_P3263274 |              |           |                                                                     |                                                                                                                                                 | 1.55373 | up | 2.06251 | up | 17416.79000 | 11607.17600 | 2856.55300  | 1221.27260 | Detected | Detected    | Detected    | Detected    |
| 3891 | A_33_P3383696 | SPEG         | Hs.21639  | SPEG complex locus                                                  | Homo sapiens SPEG complex locus (SPEG), mRNA [NM_008876]                                                                                        | 1.55364 | up | 2.81254 | up | 945.03937   | 629.84326   | 683.88824   | 214.41304  | Detected | Detected    | Detected    | Detected    |
| 3892 | A_33_P3409635 | LOC100129103 | Hs.375763 | similar to hCG2038970                                               | PREDICTED: Homo sapiens similar to hCG2038970 (LOC100129103), mRNA [XM_001717390]                                                               | 1.55286 | up | 2.82808 | up | 67.89369    | 45.27205    | 41.21406    | 12.85049   | Detected | Detected    | Detected    | Compromised |
| 3893 | A_33_P3224730 |              | Hs.32194  |                                                                     | cDNA FLJ23816 fis, clone HSI02685HCG31249 ; [Source:UniProtKB/TrEMBL;Acc:Q8TCI6] [ENST00000302461]                                              | 1.55095 | up | 2.05757 | up | 180.25728   | 120.34463   | 110.04931   | 47.16255   | Detected | Detected    | Detected    | Detected    |
| 3894 | A_23_P152462  | STX1B        | Hs.542230 | syntaxin 1B                                                         | Homo sapiens syntaxin 1B (STX1B), mRNA [NM_052674]                                                                                              | 1.54891 | up | 2.72299 | up | 14.67962    | 9.81346     | 17.68655    | 5.72746    | Detected | Compromised | Detected    | Compromised |
| 3895 | A_23_P113572  | CD19         | Hs.652262 | CD19 molecule                                                       | Homo sapiens CD19 molecule (CD19), mRNA [NM_001770]                                                                                             | 1.54713 | up | 2.17454 | up | 67.70406    | 45.31294    | 54.63095    | 22.15318   | Detected | Detected    | Detected    | Detected    |
| 3896 | A_33_P3415032 | KCNA3        | Hs.169948 | potassium voltage-gated channel, shaker-related subfamily, member 3 | Homo sapiens potassium voltage-gated channel, shaker-related subfamily, member 3 (KCNA3), mRNA [NM_002232]                                      | 1.54202 | up | 6.64309 | up | 62.31734    | 41.84573    | 37.05456    | 4.91855    | Detected | Detected    | Detected    | Compromised |
| 3897 | A_33_P3414127 | ZNF260       | Hs.18103  | zinc finger protein 260                                             | Homo sapiens zinc finger protein 260 (ZNF260), transcript variant 1, mRNA [NM_001012756]                                                        | 1.54028 | up | 2.22013 | up | 16.34578    | 10.98853    | 13.26310    | 5.26785    | Detected | Compromised | Detected    | Compromised |

|      |               |              |           |                                                                                 |                                                                                                                                                                 |         |    |          |    |            |           |           |           |             |             |             |             |
|------|---------------|--------------|-----------|---------------------------------------------------------------------------------|-----------------------------------------------------------------------------------------------------------------------------------------------------------------|---------|----|----------|----|------------|-----------|-----------|-----------|-------------|-------------|-------------|-------------|
| 3898 | A_33_P3268532 | PCK2         | Hs.75812  | phosphoenolpyruvate carboxykinase 2 (mitochondrial)                             | Homo sapiens phosphoenolpyruvate carboxykinase 2 (mitochondrial) (PCK2), nuclear gene encoding mitochondrial protein, transcript variant 2, mRNA [NM_001018073] | 1.53839 | up | 2.05897  | up | 270.39276  | 181.99623 | 145.21228 | 62.18983  | Detected    | Detected    | Detected    | Detected    |
| 3899 | A_24_P400997  | SMCHD1       | Hs.8118   | structural maintenance of chromosomes flexible hinge domain containing 1        | Homo sapiens structural maintenance of chromosomes flexible hinge domain containing 1 (SMCHD1), mRNA [NM_015295]                                                | 1.53200 | up | 2.39957  | up | 158.06845  | 106.83659 | 97.22261  | 35.72718  | Detected    | Detected    | Detected    | Detected    |
| 3900 | A_33_P3391511 | LOC100129395 | Hs.91531  | NS5ATP13TP1                                                                     | PREDICTED: Homo sapiens NS5ATP13TP1 (LOC100129395), miscRNA [XR_078529]                                                                                         | 1.52906 |    | 2.66079  |    | 44.22427   | 29.94817  | 33.13172  | 10.97993  | Detected    | Detected    | Detected    | Compromised |
| 3901 | A_33_P3240063 | C14orf48     | Hs.143845 | chromosome 14 open reading frame 48                                             | Homo sapiens chromosome 14 open reading frame 48 (C14orf48), transcript variant 1, non-coding RNA [NR_024192]                                                   | 1.52845 | up | 7.64565  | up | 76.85667   | 52.06718  | 24.17394  | 2.78804   | Detected    | Detected    | Detected    | Compromised |
| 3902 | A_33_P3306452 | LOC653510    | Hs.635227 | similar to COBW domain containing 1                                             | COBW domain-containing protein 3 (Cobalamin synthetase W domain-containing protein 3) [Source:UniProtKB/Swiss-Prot;Acc:Q5JTY5] [ENST0000455061]                 | 1.52005 |    | 2.01517  | up | 86.54411   | 58.95406  | 78.83817  | 34.49773  | Detected    | Detected    | Detected    | Detected    |
| 3903 | A_33_P3358851 |              |           |                                                                                 |                                                                                                                                                                 | 1.51623 | up | 4.73700  | up | 375.55646  | 256.47375 | 99.81415  | 18.58037  | Detected    | Detected    | Detected    | Detected    |
| 3904 | A_32_P515431  |              |           |                                                                                 |                                                                                                                                                                 | 1.51541 | up | 2.08932  | up | 14.06359   | 9.60949   | 21.10260  | 8.90628   | Detected    | Compromised | Detected    | Compromised |
| 3905 | A_23_P354217  | TMEM151A     | Hs.399779 | transmembrane protein 151A                                                      | Homo sapiens transmembrane protein 151A (TMEM151A), mRNA [NM_153286]                                                                                            | 1.51490 | up | 2.23708  | up | 329.28772  | 225.07410 | 213.91386 | 84.31846  | Detected    | Detected    | Detected    | Detected    |
| 3906 | A_33_P3228593 | WDR45        | Hs.632807 | WD repeat domain 45                                                             | Homo sapiens WD repeat domain 45, mRNA (cDNA clone IMAGE4657761), with apparent retained intron [BC035979]                                                      | 1.50864 | up | 2.63007  | up | 338.74493  | 232.49922 | 178.60486 | 59.88124  | Detected    | Detected    | Detected    | Detected    |
| 3907 | A_33_P3420496 | SNORA53      | Hs.693250 | small nucleolar RNA, H/ACA box 53                                               | Homo sapiens small nucleolar RNA, H/ACA box 53 (SNORA53), small nucleolar RNA [NR_003015]                                                                       | 1.50756 |    | 2.12053  | up | 27.10165   | 18.61462  | 30.54386  | 12.70118  | Detected    | Compromised | Detected    | Compromised |
| 3908 | A_33_P3418394 | ATG12        | Hs.264482 | ATG12 autophagy related 12 homolog (S. cerevisiae)                              | Homo sapiens ATG12 autophagy related 12 homolog (S. cerevisiae) (ATG12), mRNA [NM_004707]                                                                       | 1.49142 | up | 2.23525  | up | 48.82485   | 33.89796  | 98.99570  | 39.05317  | Detected    | Detected    | Detected    | Detected    |
| 3909 | A_23_P49546   | GRIN2C       | Hs.436980 | glutamate receptor, ionotropic, N-methyl D-aspartate 2C                         | Homo sapiens glutamate receptor, ionotropic, N-methyl D-aspartate 2C (GRIN2C), mRNA [NM_000835]                                                                 | 1.49099 | up | 2.05385  | up | 102.51369  | 71.19355  | 66.08572  | 28.37295  | Detected    | Detected    | Detected    | Detected    |
| 3910 | A_33_P3283626 |              |           |                                                                                 |                                                                                                                                                                 | 1.48735 | up | 11.40340 | up | 11.67043   | 8.12470   | 34.41100  | 2.66090   | Compromised | Compromised | Detected    | Compromised |
| 3911 | A_33_P3375527 | MIER3        | Hs.657594 | mesoderm induction early response 1, family member 3                            | Homo sapiens mesoderm induction early response 1, family member 3 (MIER3), mRNA [NM_152622]                                                                     | 1.48358 | up | 2.81350  | up | 23.66355   | 16.51589  | 28.07819  | 8.80011   | Detected    | Detected    | Detected    | Compromised |
| 3912 | A_33_P3258265 | SEMA6C       | Hs.516316 | sema domain, transmembrane domain (TM), and cytoplasmic domain, (semaphorin) 6C | Homo sapiens sema domain, transmembrane domain (TM), and cytoplasmic domain, (semaphorin) 6C (SEMA6C), mRNA [NM_030913]                                         | 1.48229 | up | 2.01583  | up | 61.76088   | 43.14322  | 41.53433  | 18.16845  | Detected    | Detected    | Detected    | Detected    |
| 3913 | A_24_P209047  | IL5          | Hs.2247   | interleukin 5 (colony-stimulating factor, eosinophil)                           | Homo sapiens interleukin 5 (colony-stimulating factor, eosinophil) (IL5), mRNA [NM_000879]                                                                      | 1.48001 | up | 11.23382 | up | 4.75747    | 3.32846   | 47.41226  | 3.72159   | Compromised | Compromised | Detected    | Compromised |
| 3914 | A_33_P3301095 |              |           |                                                                                 |                                                                                                                                                                 | 1.47687 | up | 2.62615  | up | 1091.96180 | 765.59607 | 82.04286  | 27.54778  | Detected    | Detected    | Detected    | Detected    |
| 3915 | A_33_P3400699 | SLC26A5      | Hs.585146 | solute carrier family 26, member 5 (prestin)                                    | Homo sapiens solute carrier family 26, member 5 (prestin) (SLC26A5), transcript variant b, mRNA [NM_206883]                                                     | 1.47491 | up | 2.62587  | up | 26.87829   | 18.86993  | 27.91637  | 9.37458   | Detected    | Compromised | Detected    | Compromised |
| 3916 | A_33_P3323535 |              | Hs.508885 |                                                                                 | Putative uncharacterized protein ENSP00000374960 [Source:UniProtKB/TrEMBL;Acc:A6NJY9] [ENST00000390453]                                                         | 1.47194 | up | 22.25909 | up | 5.51379    | 3.87877   | 62.57091  | 2.47874   | Compromised | Compromised | Detected    | Compromised |
| 3917 | A_33_P3398005 |              |           |                                                                                 |                                                                                                                                                                 | 1.47111 |    | 2.03864  | up | 805.41223  | 566.90090 | 568.64307 | 245.95999 | Detected    | Detected    | Detected    | Detected    |
| 3918 | A_33_P3297126 | TSNARE1      | Hs.370931 | t-SNARE domain containing 1                                                     | Homo sapiens t-SNARE domain containing 1 (TSNARE1), mRNA [NM_145003]                                                                                            | 1.46761 | up | 2.13525  | up | 49.10933   | 34.64867  | 56.54347  | 23.35066  | Detected    | Detected    | Detected    | Detected    |
| 3919 | A_23_P412427  | NS3BP        | Hs.711081 | NS3BP                                                                           | PREDICTED: Homo sapiens NS3BP (NS3BP), miscRNA [XR_041088]                                                                                                      | 1.46655 |    | 2.14099  | up | 80.67822   | 56.96281  | 103.66239 | 42.69446  | Detected    | Detected    | Detected    | Detected    |
| 3920 | A_33_P3407606 |              |           |                                                                                 |                                                                                                                                                                 | 1.46543 | up | 2.13255  | up | 102.65633  | 72.53587  | 80.62126  | 33.33616  | Detected    | Detected    | Detected    | Detected    |
| 3921 | A_33_P3328312 | HNF1A        | Hs.654455 | HNF1 homeobox A                                                                 | Homo sapiens HNF1 homeobox A (HNF1A), mRNA [NM_000545]                                                                                                          | 1.46342 | up | 2.23583  | up | 23.30296   | 16.48832  | 25.50851  | 10.06032  | Detected    | Detected    | Detected    | Compromised |
| 3922 | A_32_P123255  | ANKRD58      | Hs.355223 | ankyrin repeat domain 58                                                        | Homo sapiens ankyrin repeat domain 58 (ANKRD58), mRNA [NM_001105576]                                                                                            | 1.46145 | up | 2.70901  | up | 212.15044  | 150.31140 | 171.74454 | 55.90337  | Detected    | Detected    | Detected    | Detected    |
| 3923 | A_33_P3261418 | CACNA1G      | Hs.591169 | calcium channel, voltage-dependent, T type, alpha 1G subunit                    | Homo sapiens calcium channel, voltage-dependent, T type, alpha 1G subunit (CACNA1G), transcript variant 15, mRNA [NM_198397]                                    | 1.46137 | up | 3.29298  | up | 12.61722   | 8.93999   | 9.47794   | 2.53799   | Detected    | Compromised | Compromised | Compromised |
| 3924 | A_33_P3351790 | LOC100133599 |           | hypothetical protein LOC100133599                                               | PREDICTED: Homo sapiens hypothetical LOC100133599 (LOC100133599), mRNA [XM_001715586]                                                                           | 1.45983 |    | 6.85620  | up | 4.35403    | 3.08832   | 45.68108  | 5.87515   | Compromised | Compromised | Detected    | Compromised |
| 3925 | A_33_P3315060 | ZC3H11A      | Hs.532399 | zinc finger CCOH-type containing 11A                                            | Homo sapiens mRNA; cDNA DKFZ781G2455 (from clone DKFZ781G2455) [CR627439]                                                                                       | 1.45909 | up | 2.00300  | up | 84.48402   | 59.95505  | 64.69343  | 28.48030  | Detected    | Detected    | Detected    | Detected    |
| 3926 | A_33_P3392087 | IDUA         | Hs.89560  | iduronidase, alpha-L-                                                           | Homo sapiens iduronidase, alpha-L- (IDUA), mRNA [NM_000203]                                                                                                     | 1.45615 | up | 2.15741  | up | 1383.64340 | 983.89780 | 817.60680 | 334.17798 | Detected    | Detected    | Detected    | Detected    |
| 3927 | A_33_P3285277 | CACNB2       | Hs.59093  | calcium channel, voltage-dependent, beta 2 subunit                              | Homo sapiens calcium channel, voltage-dependent, beta 2 subunit (CACNB2), transcript variant 5, mRNA [NM_201593]                                                | 1.45614 | up | 4.24524  | up | 48.26880   | 34.32385  | 32.54459  | 6.75993   | Detected    | Detected    | Detected    | Compromised |
| 3928 | A_33_P3315906 | PTP4A3       | Hs.43666  | protein tyrosine phosphatase type IVA, member 3                                 | Homo sapiens protein tyrosine phosphatase type IVA, member 3 (PTP4A3), transcript variant 1, mRNA [NM_032611]                                                   | 1.45505 | up | 2.33470  | up | 59.65834   | 42.45469  | 81.28342  | 30.69987  | Detected    | Detected    | Detected    | Detected    |

|      |               |           |           |                                                                                                |                                                                                                                                                                                                |         |    |         |    |            |            |            |           |          |             |             |             |
|------|---------------|-----------|-----------|------------------------------------------------------------------------------------------------|------------------------------------------------------------------------------------------------------------------------------------------------------------------------------------------------|---------|----|---------|----|------------|------------|------------|-----------|----------|-------------|-------------|-------------|
| 3929 | A_33_P3357199 | SH2D6     | Hs.209542 | SH2 domain containing 6                                                                        | Homo sapiens SH2 domain containing 6 (SH2D6), mRNA [NM_198482]                                                                                                                                 | 1.44919 | up | 2.49185 | up | 28.19188   | 20.14340   | 31.75531   | 11.23727  | Detected | Detected    | Detected    | Compromised |
| 3930 | A_33_P3335730 |           | Hs.533036 |                                                                                                | Putative uncharacterized protein ENSP00000366515 [Source:UniProtKB/TrEMBL;Acc:B7WN50] [ENST00000377300]                                                                                        | 1.44837 | up | 2.17993 | up | 43.45096   | 31.06376   | 21.17938   | 8.56713   | Detected | Detected    | Detected    | Compromised |
| 3931 | A_33_P3308219 |           |           |                                                                                                |                                                                                                                                                                                                | 1.44778 | up | 2.48065 | up | 110.40868  | 78.96509   | 112.92981  | 40.14286  | Detected | Detected    | Detected    | Detected    |
| 3932 | A_23_P101623  | ZNF667    | Hs.676605 | zinc finger protein 667                                                                        | Homo sapiens zinc finger protein 667 (ZNF667), mRNA [NM_022103]                                                                                                                                | 1.44773 | up | 2.21588 | up | 156.87020  | 112.19800  | 53.37379   | 21.23962  | Detected | Detected    | Detected    | Detected    |
| 3933 | A_23_P137705  | TBX19     | Hs.716656 | T-box 19                                                                                       | Homo sapiens T-box 19 (TBX19), mRNA [NM_005149]                                                                                                                                                | 1.44769 | up | 2.65921 | up | 643.15106  | 460.01474  | 326.19530  | 108.16612 | Detected | Detected    | Detected    | Detected    |
| 3934 | A_33_P3332156 | C1orf95   | Hs.116827 | chromosome 1 open reading frame 95                                                             | Homo sapiens chromosome 1 open reading frame 95 (C1orf95), mRNA [NM_001003665]                                                                                                                 | 1.44731 | up | 2.97718 | up | 33.62275   | 24.05494   | 33.32795   | 9.87117   | Detected | Detected    | Detected    | Compromised |
| 3935 | A_33_P3312194 |           |           |                                                                                                | Tubulin folding cofactor B (Tubulin-specific chaperone B)(Cytoskeleton-associated protein 1)(Cytoskeleton-associated protein CKAP1) [Source:UniProtKB/Swiss-Prot;Acc:Q99426] [ENST00000392178] | 1.44583 | up | 2.28019 | up | 28.82057   | 20.64041   | 36.21888   | 14.00650  | Detected | Detected    | Detected    | Compromised |
| 3936 | A_32_P163147  | VSIG1     | Hs.177164 | V-set and immunoglobulin domain containing 1                                                   | Homo sapiens V-set and immunoglobulin domain containing 1 (VSIG1), mRNA [NM_182607]                                                                                                            | 1.44361 | up | 2.38333 | up | 43.43386   | 31.15377   | 32.87548   | 12.16334  | Detected | Detected    | Detected    | Compromised |
| 3937 | A_32_P82111   | LRFN2     | Hs.250015 | leucine rich repeat and fibronectin type III domain containing 2                               | Homo sapiens leucine rich repeat and fibronectin type III domain containing 2 (LRFN2), mRNA [NM_020737]                                                                                        | 1.44350 | up | 2.93666 | up | 14.57191   | 10.45277   | 10.38243   | 3.11754   | Detected | Compromised | Compromised | Compromised |
| 3938 | A_23_P251232  | TTTY14    |           | testis-specific transcript, Y-linked 14 (non-protein coding)                                   | Homo sapiens testis-specific transcript, Y-linked 14 (non-protein coding) (TTTY14), non-coding RNA [NR_001543]                                                                                 | 1.44269 | up | 3.57590 | up | 908.98193  | 652.40314  | 321.14133  | 79.19099  | Detected | Detected    | Detected    | Detected    |
| 3939 | A_33_P3352098 | MS4A7     | Hs.530735 | membrane-spanning 4-domains, subfamily A, member 7                                             | Homo sapiens membrane-spanning 4-domains, subfamily A, member 7 (MS4A7), transcript variant 1, mRNA [NM_021201]                                                                                | 1.43884 | up | 4.02572 | up | 107.39803  | 77.28912   | 12.54706   | 2.74830   | Detected | Detected    | Compromised | Compromised |
| 3940 | A_32_P159535  |           |           |                                                                                                |                                                                                                                                                                                                | 1.43591 | up | 2.15220 | up | 90.39230   | 65.18322   | 14.40111   | 5.90036   | Detected | Detected    | Detected    | Compromised |
| 3941 | A_33_P3383149 | ZCWPW2    | Hs.659030 | zinc finger, CW type with PWFP domain 2                                                        | Homo sapiens zinc finger, CW type with PWFP domain 2 (ZCWPW2), mRNA [NM_001040432]                                                                                                             | 1.43565 | up | 2.05537 | up | 54.03496   | 38.97273   | 47.10782   | 20.21014  | Detected | Detected    | Detected    | Detected    |
| 3942 | A_33_P3350549 |           |           |                                                                                                |                                                                                                                                                                                                | 1.43221 | up | 3.48936 | up | 799.59863  | 578.09326  | 107.13720  | 27.07447  | Detected | Detected    | Detected    | Detected    |
| 3943 | A_33_P3410925 | KLF1      | Hs.37860  | Kruppel-like factor 1 (erythroid)                                                              | Homo sapiens Kruppel-like factor 1 (erythroid) (KLF1), mRNA [NM_006563]                                                                                                                        | 1.43169 | up | 2.32111 | up | 434.61456  | 314.33100  | 294.41060  | 111.84659 | Detected | Detected    | Detected    | Detected    |
| 3944 | A_33_P3301291 | FOXB2     | Hs.553843 | forkhead box B2                                                                                | Homo sapiens forkhead box B2 (FOXB2), mRNA [NM_001013735]                                                                                                                                      | 1.42755 | up | 2.37058 | up | 24.68746   | 17.90682   | 7.10983    | 2.64466   | Detected | Detected    | Compromised | Compromised |
| 3945 | A_23_P153855  | ZNF492    | Hs.232108 | zinc finger protein 492                                                                        | Homo sapiens zinc finger protein 492 (ZNF492), mRNA [NM_020855]                                                                                                                                | 1.42712 | up | 5.00885 | up | 215.54400  | 156.38942  | 32.11036   | 5.65291   | Detected | Detected    | Detected    | Compromised |
| 3946 | A_33_P3387616 | RHPN1     | Hs.521912 | rhophilin, Rho GTPase binding protein 1                                                        | Homo sapiens rhophilin, Rho GTPase binding protein 1 (RHPN1), mRNA [NM_05924]                                                                                                                  | 1.42603 | up | 2.34784 | up | 60.03308   | 43.59094   | 43.18220   | 16.21818  | Detected | Detected    | Detected    | Detected    |
| 3947 | A_33_P3376622 | MLLT6     | Hs.91531  | myeloid/lymphoid or mixed-lineage leukemia (trithorax homolog, Drosophila), translocated to, 6 | Homo sapiens myeloid/lymphoid or mixed-lineage leukemia (trithorax homolog, Drosophila); translocated to, 6 (MLLT6), mRNA [NM_005937]                                                          | 1.42347 | up | 3.79397 | up | 37.55910   | 27.32118   | 46.45355   | 10.79670  | Detected | Detected    | Detected    | Compromised |
| 3948 | A_23_P142125  | HRC       | Hs.436885 | histidine rich calcium binding protein                                                         | Homo sapiens histidine rich calcium binding protein (HRC), mRNA [NM_002152]                                                                                                                    | 1.42092 | up | 2.06749 | up | 144.42276  | 105.24421  | 97.27160   | 41.48659  | Detected | Detected    | Detected    | Detected    |
| 3949 | A_33_P3226788 |           |           |                                                                                                |                                                                                                                                                                                                | 1.41990 | up | 2.67150 | up | 1727.54100 | 1259.80570 | 122.48583  | 40.42934  | Detected | Detected    | Detected    | Detected    |
| 3950 | A_33_P3242703 |           |           |                                                                                                | DNA repair protein RAD52 homolog [Source:UniProtKB/Swiss-Prot;Acc:P43351] [ENST00000397230]                                                                                                    | 1.41465 | up | 2.28139 | up | 77.13312   | 56.45809   | 30.25491   | 11.69395  | Detected | Detected    | Detected    | Compromised |
| 3951 | A_32_P116989  | ZOCHC18   | Hs.648338 | zinc finger, CCHC domain containing 18                                                         | Homo sapiens zinc finger, CCHC domain containing 18 (ZOCHC18), transcript variant 1, mRNA [NM_001143978]                                                                                       | 1.41416 | up | 2.87153 | up | 44.47654   | 32.56617   | 45.53941   | 13.98428  | Detected | Detected    | Detected    | Compromised |
| 3952 | A_33_P3372074 | LLGL2     | Hs.514477 | lethal giant larvae homolog 2 (Drosophila)                                                     | Homo sapiens lethal giant larvae homolog 2 (Drosophila) (LLGL2), transcript variant 3, mRNA [NM_001031803]                                                                                     | 1.41091 | up | 2.03007 | up | 63.81958   | 46.83674   | 34.05516   | 14.79232  | Detected | Detected    | Detected    | Detected    |
| 3953 | A_24_P410610  | DPYD      | Hs.335034 | dihydropyrimidine dehydrogenase                                                                | Homo sapiens dihydropyrimidine dehydrogenase (DPYD), transcript variant 2, mRNA [NM_001160301]                                                                                                 | 1.40466 | up | 2.24557 | up | 18.79734   | 13.85666   | 20.31011   | 7.97539   | Detected | Compromised | Detected    | Compromised |
| 3954 | A_33_P3416687 |           |           |                                                                                                | GB                                                                                                                                                                                             | 1.40020 | up | 2.40617 | up | 361.41077  | 267.26694  | 119.65700  | 43.85080  | Detected | Detected    | Detected    | Detected    |
| 3955 | A_33_P3326733 | LOC729668 |           | golgi autoantigen, golgin subfamily a, 6 pseudogene                                            | Homo sapiens golgi autoantigen, golgin subfamily a, 6 pseudogene (LOC729668), non-coding RNA [NR_003524]                                                                                       | 1.39890 | up | 2.27896 | up | 2555.53440 | 1891.58980 | 1125.10230 | 435.33310 | Detected | Detected    | Detected    | Detected    |
| 3956 | A_33_P3648597 | LOC283075 | Hs.587657 | hypothetical protein LOC283075                                                                 | Homo sapiens cDNA FLJ39053 fis, clone NT2RP7012291 [AK098372]                                                                                                                                  | 1.39770 | up | 2.29161 | up | 105.30670  | 78.01463   | 59.65579   | 22.95503  | Detected | Detected    | Detected    | Detected    |
| 3957 | A_33_P3214869 | KPNA7     | Hs.253050 | karyopherin alpha 7 (importin alpha 8)                                                         | Homo sapiens karyopherin alpha 7 (importin alpha 8) (KPNA7), mRNA [NM_001145715]                                                                                                               | 1.39554 | up | 2.04499 | up | 23.92537   | 17.75214   | 13.91151   | 5.99858   | Detected | Compromised | Compromised | Compromised |
| 3958 | A_33_P3351356 |           |           |                                                                                                | Rho guanine nucleotide exchange factor 10 [Source:UniProtKB/Swiss-Prot;Acc:O15013] [ENST00000398560]                                                                                           | 1.39319 | up | 2.15591 | up | 85.30164   | 63.39869   | 53.17164   | 21.74783  | Detected | Detected    | Detected    | Detected    |
| 3959 | A_33_P3352980 |           |           |                                                                                                |                                                                                                                                                                                                | 1.39272 | up | 2.57078 | up | 2132.55300 | 1585.51560 | 420.07617  | 144.08815 | Detected | Detected    | Detected    | Detected    |
| 3960 | A_33_P3280502 |           |           |                                                                                                |                                                                                                                                                                                                | 1.38626 | up | 2.02885 | up | 88.46894   | 66.08128   | 72.98690   | 31.72196  | Detected | Detected    | Detected    | Detected    |
| 3961 | A_24_P326739  | GLS2      | Hs.212606 | glutaminase 2 (liver, mitochondrial)                                                           | Homo sapiens glutaminase 2 (liver, mitochondrial) (GLS2), nuclear gene encoding mitochondrial protein, mRNA [NM_013267]                                                                        | 1.38322 | up | 6.24036 | up | 27.46070   | 20.55669   | 25.84714   | 3.65232   | Detected | Detected    | Detected    | Compromised |

|      |               |              |           |                                                                            |                                                                                                                                                 |         |    |         |    |            |            |           |           |             |             |             |             |
|------|---------------|--------------|-----------|----------------------------------------------------------------------------|-------------------------------------------------------------------------------------------------------------------------------------------------|---------|----|---------|----|------------|------------|-----------|-----------|-------------|-------------|-------------|-------------|
| 3962 | A_33_P3349702 | LOC400927    |           | TPTE and PTEN homologous inositol lipid phosphatase pseudogene             | Homo sapiens TPTE and PTEN homologous inositol lipid phosphatase pseudogene (LOC400927), non-coding RNA [NR_002821]                             | 1.37658 | up | 2.43028 | up | 118.61581  | 89.22250   | 92.14616  | 33.43390  | Detected    | Detected    | Detected    | Detected    |
| 3963 | A_33_P3314594 | RAB37        | Hs.351413 | RAB37, member RAS oncogene family                                          | Homo sapiens RAB37, member RAS oncogene family (RAB37), transcript variant 3, mRNA [NM_175738]                                                  | 1.37588 | up | 2.03991 | up | 212.48490  | 159.91208  | 118.72873 | 51.32279  | Detected    | Detected    | Detected    | Detected    |
| 3964 | A_23_P412029  | PUS10        | Hs.368348 | pseudouridylylase synthase 10                                              | Homo sapiens pseudouridylylase synthase 10 (PUS10), mRNA [NM_144709]                                                                            | 1.37484 | up | 2.10148 | up | 26.27853   | 19.79172   | 18.93067  | 7.94339   | Detected    | Detected    | Detected    | Compromised |
| 3965 | A_24_P50091   | C15orf51     | Hs.585319 | dynamin 1 pseudogene                                                       | Homo sapiens chromosome 15 open reading frame 51 (C15orf51), non-coding RNA [NR_003260]                                                         | 1.37145 | up | 2.05582 | up | 31.72077   | 23.94946   | 18.69385  | 8.01825   | Detected    | Detected    | Detected    | Compromised |
| 3966 | A_23_P129835  | PPP1R1B      | Hs.286192 | protein phosphatase 1, regulatory (inhibitor) subunit 1B                   | Homo sapiens protein phosphatase 1, regulatory (inhibitor) subunit 1B (PPP1R1B), transcript variant 1, mRNA [NM_032192]                         | 1.36838 | up | 2.70058 | up | 6.47051    | 4.89625    | 17.71794  | 5.78525   | Compromised | Compromised | Detected    | Compromised |
| 3967 | A_33_P3308167 | POLR2J4      | Hs.657028 | polymerase (RNA) II (DNA directed) polypeptide J4, pseudogene              | Homo sapiens polymerase (RNA) II (DNA directed) polypeptide J4, pseudogene (POLR2J4), non-coding RNA [NR_003655]                                | 1.36550 | up | 2.03145 | up | 30.47665   | 23.11046   | 34.24526  | 14.86484  | Detected    | Detected    | Detected    | Detected    |
| 3968 | A_33_P3316934 |              |           |                                                                            |                                                                                                                                                 | 1.36261 | up | 3.32316 | up | 24.54410   | 18.65124   | 16.09832  | 4.27164   | Detected    | Detected    | Detected    | Compromised |
| 3969 | A_33_P3704280 | FLJ38109     | Hs.652083 | hypothetical protein FLJ38109                                              | Homo sapiens cDNA FLJ38109 fis. clone D3OST2001788 [AK095428]                                                                                   | 1.36237 | up | 2.81429 | up | 30.08203   | 22.86355   | 16.16808  | 5.06588   | Detected    | Detected    | Compromised | Compromised |
| 3970 | A_33_P3301469 | NCRNA00164   | Hs.380689 | non-protein coding RNA 164                                                 | Homo sapiens non-protein coding RNA 164 (NCRNA00164), transcript variant 1, non-coding RNA [NR_027019]                                          | 1.36117 | up | 2.47989 | up | 131.40797  | 99.96354   | 22.34380  | 7.94493   | Detected    | Detected    | Detected    | Compromised |
| 3971 | A_33_P3332474 | GOLGA6L1     | Hs.531569 | golgi autoantigen, golgin subfamily a, 6-like 1                            | Homo sapiens golgi autoantigen, golgin subfamily a, 6-like 1 (GOLGA6L1), mRNA [NM_001001413]                                                    | 1.35861 | up | 2.44069 | up | 39.39558   | 30.02523   | 20.39983  | 7.37020   | Detected    | Detected    | Detected    | Compromised |
| 3972 | A_33_P3397603 | LOC100130278 | Hs.638469 | hypothetical protein LOC100130278                                          | Homo sapiens cDNA FLJ36795 fis. clone ADRGL2006767 [AK094114]                                                                                   | 1.35181 | up | 2.47612 | up | 9.62989    | 7.37632    | 13.63893  | 4.85706   | Compromised | Compromised | Detected    | Compromised |
| 3973 | A_33_P3474250 | LOC283270    | Hs.629770 | hypothetical protein LOC283270                                             | Homo sapiens cDNA FLJ33733 fis. clone BRAWH2018267 [AK091052]                                                                                   | 1.34332 | up | 2.00891 | up | 3026.37180 | 2332.79740 | 237.01600 | 104.03601 | Detected    | Detected    | Detected    | Detected    |
| 3974 | A_33_P3262118 |              | Hs.257900 |                                                                            | Leucine zipper protein 1 [Source:UniProtKB/Swiss-Prot;Acc:Q86V48] [ENST00000314174]                                                             | 1.34056 | up | 2.33167 | up | 17.28480   | 13.35092   | 10.92846  | 4.13293   | Detected    | Compromised | Compromised | Compromised |
| 3975 | A_33_P3405369 | KRTAP5-4     | Hs.539087 | keratin associated protein 5-4                                             | Homo sapiens keratin associated protein 5-4 (KRTAP5-4), mRNA [NM_001012709]                                                                     | 1.34035 | up | 2.40258 | up | 22.80168   | 17.61503   | 8.89320   | 3.26397   | Detected    | Compromised | Compromised | Compromised |
| 3976 | A_33_P3314857 | KCNJ13       | Hs.467338 | potassium inwardly-rectifying channel, subfamily J, member 13              | Homo sapiens potassium inwardly-rectifying channel, subfamily J, member 13 (KCNJ13), mRNA [NM_002242]                                           | 1.33638 | up | 2.88494 | up | 21.59785   | 16.73457   | 11.03369  | 3.37248   | Detected    | Compromised | Compromised | Compromised |
| 3977 | A_23_P104705  | SLC29A2      | Hs.569017 | solute carrier family 29 (nucleoside transporters), member 2               | Homo sapiens solute carrier family 29 (nucleoside transporters), member 2 (SLC29A2), mRNA [NM_001532]                                           | 1.33464 | up | 3.78798 | up | 51.82099   | 40.20459   | 22.52219  | 5.24286   | Detected    | Detected    | Detected    | Compromised |
| 3978 | A_23_P408232  | MGC23270     | Hs.352220 | hypothetical LOC196872                                                     | Homo sapiens hypothetical LOC196872 (MGC23270), non-coding RNA [NR_024396]                                                                      | 1.33253 | up | 2.69705 | up | 16.35067   | 12.70547   | 12.59482  | 4.11783   | Detected    | Compromised | Compromised | Compromised |
| 3979 | A_33_P3336552 | LOC100130701 | Hs.711483 | similar to hCG1657343                                                      | PREDICTED: Homo sapiens similar to hCG1657343 (LOC100130701), mRNA [XM_001715398]                                                               | 1.33027 | up | 3.66945 | up | 13.29634   | 10.34963   | 21.47342  | 5.16019   | Compromised | Compromised | Detected    | Compromised |
| 3980 | A_33_P3454679 | LOC100134702 |           | hypothetical LOC100134702                                                  | PREDICTED: Homo sapiens similar to mucin (LOC100134702), mRNA [XM_002344283]                                                                    | 1.32946 | up | 2.17050 | up | 306.30768  | 238.57022  | 148.36280 | 60.27401  | Detected    | Detected    | Detected    | Detected    |
| 3981 | A_33_P3714477 | LOC285972    | Hs.647110 | hypothetical protein LOC285972                                             | Homo sapiens cDNA FLJ39839 fis. clone SPLEN2014136 [AK097158]                                                                                   | 1.32544 | up | 3.55458 | up | 30.11023   | 23.52273   | 12.31133  | 3.05410   | Detected    | Detected    | Compromised | Compromised |
| 3982 | A_23_P29922   | TLR3         | Hs.657724 | toll-like receptor 3                                                       | Homo sapiens toll-like receptor 3 (TLR3), mRNA [NM_003265]                                                                                      | 1.31968 | up | 2.37392 | up | 14.24198   | 11.17471   | 12.45357  | 4.62588   | Detected    | Compromised | Detected    | Compromised |
| 3983 | A_33_P3417547 |              |           |                                                                            |                                                                                                                                                 | 1.31884 | up | 3.74995 | up | 45.70442   | 35.88381   | 19.43917  | 4.57107   | Detected    | Detected    | Detected    | Compromised |
| 3984 | A_33_P3237744 | LOC100130827 | Hs.712129 | similar to Putative uncharacterized serine/threonine-protein kinase SgK110 | PREDICTED: Homo sapiens similar to Putative uncharacterized serine/threonine-protein kinase SgK110 (LOC100130827), miscRNA [XR_042316]          | 1.31808 | up | 2.73442 | up | 32.76052   | 25.73616   | 25.67542  | 8.27977   | Detected    | Detected    | Detected    | Compromised |
| 3985 | A_23_P107981  | SULT2B1      | Hs.369331 | sulfotransferase family, cytosolic, 2B, member 1                           | Homo sapiens sulfotransferase family, cytosolic, 2B, member 1 (SULT2B1), transcript variant 1, mRNA [NM_004605]                                 | 1.31805 | up | 3.80985 | up | 16.43002   | 12.90746   | 14.69255  | 3.40059   | Detected    | Compromised | Detected    | Compromised |
| 3986 | A_33_P3658861 | SNORA26      | Hs.635034 | small nucleolar RNA, H/ACA box 26                                          | qi73d08.y5 NCI CGAP Ov26 Homo sapiens cDNA clone IMAGE:1862127 5', mRNA sequence [AI792523]                                                     | 1.31154 | up | 2.90855 | up | 107.04500  | 84.51167   | 58.85277  | 17.84252  | Detected    | Detected    | Detected    | Detected    |
| 3987 | A_33_P3271965 | GRM1         | Hs.32945  | glutamate receptor, metabotropic 1                                         | Homo sapiens glutamate receptor, metabotropic 1 (GRM1), transcript variant 1, mRNA [NM_000638]                                                  | 1.30795 | up | 2.10729 | up | 37.78208   | 29.91083   | 13.17137  | 5.51152   | Detected    | Detected    | Compromised | Compromised |
| 3988 | A_23_P161769  | FXSD2        | Hs.413137 | FXSD domain containing ion transport regulator 2                           | Homo sapiens FXSD domain containing ion transport regulator 2 (FXSD2), transcript variant b, mRNA [NM_021603]                                   | 1.30592 | up | 2.93569 | up | 42.27184   | 33.51709   | 34.25326  | 10.28862  | Detected    | Detected    | Detected    | Compromised |
| 3989 | A_23_P30634   | BACH2        | Hs.269764 | BTB and CNC homology 1, basic leucine zipper transcription factor 2        | Homo sapiens BTB and CNC homology 1, basic leucine zipper transcription factor 2 (BACH2), mRNA [NM_021813]                                      | 1.30547 | up | 3.45878 | up | 42.06140   | 33.36184   | 31.40398  | 8.00621   | Detected    | Detected    | Detected    | Compromised |
| 3990 | A_33_P3218410 |              | Hs.367437 |                                                                            | Serine-protein kinase ATM (EC 2.7.11.1)(Ataxia telangiectasia mutated)(A-T, mutated) [Source:UniProtKB/Swiss-Prot;Acc:Q13315] [ENST00000389511] | 1.29890 | up | 2.29266 | up | 22.29364   | 17.77213   | 8.93978   | 3.43838   | Detected    | Compromised | Compromised | Compromised |

|      |                |           |           |                                                    |                                                                                                                                                                      |         |    |         |    |            |           |           |           |             |             |              |             |
|------|----------------|-----------|-----------|----------------------------------------------------|----------------------------------------------------------------------------------------------------------------------------------------------------------------------|---------|----|---------|----|------------|-----------|-----------|-----------|-------------|-------------|--------------|-------------|
| 3991 | A_33_P3295423  | ZXDC      | Hs.440049 | ZXD family zinc finger C                           | Homo sapiens ZXD family zinc finger C (ZXDC), transcript variant 2, mRNA [NM_001040633]                                                                              | 1.29858 | up | 2.00618 | up | 86.53945   | 69.00472  | 59.36798  | 26.09438  | Detected    | Detected    | Detected     | Detected    |
| 3992 | A_24_P941898   | FAM22D    | Hs.701044 | family with sequence similarity 22, member D       | Homo sapiens family with sequence similarity 22, member D (FAM22D), mRNA [NM_001009610]                                                                              | 1.29764 | up | 2.35244 | up | 53.55354   | 42.73327  | 26.86187  | 10.06892  | Detected    | Detected    | Detected     | Compromised |
| 3993 | A_33_P3280687  | LENG8     | Hs.720354 | leukocyte receptor cluster (LRC) member 8          | Homo sapiens leukocyte receptor cluster (LRC) member 8 (LENG8), mRNA [NM_052925]                                                                                     | 1.29639 | up | 2.06797 | up | 13.79365   | 11.01731  | 18.27069  | 7.79071   | Compromised | Compromised | Detected     | Compromised |
| 3994 | A_33_P3279871  |           | Hs.568075 |                                                    | Putative uncharacterized protein ENSP00000380325 Fragment [Source:UniProtKB/TrEMBL;Acc:A8MT48] [ENST00000397136]                                                     | 1.29619 | up | 2.71008 | up | 33.69389   | 26.91633  | 19.35029  | 6.29608   | Detected    | Detected    | Detected     | Compromised |
| 3995 | A_33_P3404706  | SPN       | Hs.632188 | sialoporphin                                       | Homo sapiens sialoporphin (SPN), transcript variant 1, mRNA [NM_001030288]                                                                                           | 1.29570 | up | 2.08815 | up | 25.29750   | 20.21648  | 17.65699  | 7.45623   | Detected    | Detected    | Detected     | Compromised |
| 3996 | A_33_P3402086  |           |           |                                                    | Proto-oncogene tyrosine-protein kinase MER Precursor (C-mer)(EC 2.7.10.1)(Receptor tyrosine kinase MerTK) [Source:UniProtKB/Swiss-Prot;Acc:Q12866] [ENST00000393237] | 1.29440 | up | 3.39144 | up | 49.94673   | 39.95491  | 23.82013  | 6.19336   | Detected    | Detected    | Detected     | Compromised |
| 3997 | A_32_P119248   | FOXD4     | Hs.584759 | forkhead box D4                                    | Homo sapiens forkhead box D4 (FOXD4), mRNA [NM_207305]                                                                                                               | 1.29050 | up | 2.21114 | up | 22.48050   | 18.03764  | 18.57067  | 7.40590   | Detected    | Compromised | Detected     | Compromised |
| 3998 | A_33_P3328087  |           |           |                                                    | PRO2532 [Source:UniProtKB/TrEMBL;Acc:G9H399] [ENST00000391336]                                                                                                       | 1.28856 | up | 3.12656 | up | 25.92933   | 20.83626  | 9.56369   | 2.69727   | Detected    | Detected    | Compromised  | Compromised |
| 3999 | A_24_P935682   | UNQ6228   | Hs.661972 | hypothetical LOC100131541                          | Homo sapiens clone DNA166629 MFS5228 (UNQ6228) mRNA, complete cds. [AY358248]                                                                                        | 1.27970 | up | 2.05435 | up | 74.27256   | 60.09716  | 39.07020  | 16.77013  | Detected    | Detected    | Detected     | Detected    |
| 4000 | A_23_P123596   | GLDC      | Hs.584238 | glycine dehydrogenase (decarboxylating)            | Homo sapiens glycine dehydrogenase (decarboxylating) (GLDC), mRNA [NM_000170]                                                                                        | 1.27797 | up | 2.34221 | up | 165.26158  | 133.90130 | 122.23808 | 46.02000  | Detected    | Detected    | Detected     | Detected    |
| 4001 | A_33_P3277367  | LOC732146 |           | hypothetical protein LOC732146                     | PREDICTED: Homo sapiens hypothetical LOC732146 (LOC732146), mRNA [XM_001131995]                                                                                      | 1.27486 | up | 4.59449 | up | 52.68789   | 42.79372  | 40.03375  | 7.68341   | Detected    | Detected    | Detected     | Compromised |
| 4002 | A_24_P942132   | TRAPPC6B  | Hs.13303  | trafficking protein particle complex 6B            | Homo sapiens trafficking protein particle complex 6B (TRAPPC6B), transcript variant 1, mRNA [NM_001079537]                                                           | 1.27472 | up | 2.35653 | up | 65.89002   | 53.52268  | 13.96898  | 5.22707   | Detected    | Detected    | Compromised  | Compromised |
| 4003 | A_24_P337419   | TIGD6     | Hs.169333 | tigger transposable element derived 6              | Homo sapiens tigger transposable element derived 6 (TIGD6), mRNA [NM_030953]                                                                                         | 1.27331 | up | 3.55820 | up | 62.75986   | 51.03650  | 42.15773  | 10.44751  | Detected    | Detected    | Detected     | Compromised |
| 4004 | A_33_P3298111  |           |           |                                                    | Spermatogenesis-associated protein 13 [Source:UniProtKB/Swiss-Prot;Acc:Q96N96] [ENST00000360220]                                                                     | 1.26706 | up | 2.83509 | up | 19.56452   | 15.98846  | 33.27119  | 10.34826  | Detected    | Detected    | Detected     | Compromised |
| 4005 | A_33_P33348973 | PIKFYVE   | Hs.720192 | phosphoinositide kinase, FYVE finger containing    | Homo sapiens phosphoinositide kinase, FYVE finger containing (PIKFYVE), transcript variant 3, mRNA [NM_152671]                                                       | 1.26683 | up | 2.06788 | up | 31.13085   | 25.44510  | 33.24003  | 14.17428  | Detected    | Detected    | Detected     | Detected    |
| 4006 | A_33_P3632866  | C9orf96   | Hs.720195 | chromosome 9 open reading frame 96                 | Homo sapiens chromosome 9 open reading frame 96 (C9orf96), mRNA [NM_153710]                                                                                          | 1.26661 | up | 3.25473 | up | 62.38347   | 50.99887  | 60.91553  | 16.50360  | Detected    | Detected    | Detected     | Detected    |
| 4007 | A_33_P3294446  | HMBX1     | Hs.591836 | homeobox containing 1                              | Homo sapiens homeobox containing 1 (HMBX1), transcript variant 1, mRNA [NM_024567]                                                                                   | 1.26554 | up | 2.92078 | up | 33.33921   | 27.27810  | 21.81333  | 6.58550   | Detected    | Detected    | Detected     | Compromised |
| 4008 | A_33_P3229678  | FLJ39739  | Hs.636949 | hypothetical FLJ39739                              | PREDICTED: Homo sapiens hypothetical FLJ39739 (FLJ39739), miscRNA [XR_079533]                                                                                        | 1.26469 | up | 2.73683 | up | 20.09613   | 16.45361  | 8.51348   | 2.74299   | Detected    | Detected    | Compromised  | Compromised |
| 4009 | A_23_P47777    | MARCH9    | Hs.632709 | membrane-associated ring finger (C3HC4) 9          | Homo sapiens membrane-associated ring finger (C3HC4) 9 (MARCH9), mRNA [NM_138396]                                                                                    | 1.25441 | up | 2.48888 | up | 1206.71860 | 996.08887 | 920.76135 | 326.21796 | Detected    | Detected    | Detected     | Detected    |
| 4010 | A_23_P340308   | TAS2R19   | Hs.688196 | taste receptor, type 2, member 19                  | Homo sapiens taste receptor, type 2, member 19 (TAS2R19), mRNA [NM_176888]                                                                                           | 1.25264 | up | 2.82554 | up | 18.20434   | 15.04805  | 11.34689  | 3.54112   | Detected    | Compromised | Compromised  | Compromised |
| 4011 | A_33_P3285456  | C1orf68   | Hs.601077 | chromosome 1 open reading frame 68                 | Homo sapiens chromosome 1 open reading frame 68 (C1orf68), mRNA [NM_001024679]                                                                                       | 1.24558 | up | 2.12257 | up | 88.84795   | 73.85980  | 29.51818  | 12.26289  | Detected    | Detected    | Detected     | Compromised |
| 4012 | A_24_P342944   | CSPG5     | Hs.45127  | chondroitin sulfate proteoglycan 5 (neuroglycan C) | Homo sapiens chondroitin sulfate proteoglycan 5 (neuroglycan C) (CSPG5), mRNA [NM_006574]                                                                            | 1.24460 | up | 2.19365 | up | 3.93170    | 3.27103   | 17.97943  | 7.22728   | Compromised | Compromised | Detected     | Compromised |
| 4013 | A_33_P3282740  |           | Hs.660463 |                                                    | hypothetical LOC728855 (LOC728855), non-coding RNA [Source:RefSeq;DNA;Acc:NR_024510] [ENST00000412305]                                                               | 1.24371 | up | 2.27379 | up | 13.03383   | 10.85138  | 17.60691  | 6.82808   | Compromised | Compromised | Detected     | Compromised |
| 4014 | A_23_P154643   | BMP7      | Hs.473163 | bone morphogenetic protein 7                       | Homo sapiens bone morphogenetic protein 7 (BMP7), mRNA [NM_001719]                                                                                                   | 1.24323 | up | 2.19397 | up | 20.71513   | 17.25314  | 22.60521  | 9.08539   | Detected    | Detected    | Detected     | Compromised |
| 4015 | A_33_P3391419  | SOBP      | Hs.445244 | sine oculis binding protein homolog (Drosophila)   | Homo sapiens sine oculis binding protein homolog (Drosophila) (SOBP), mRNA [NM_018013]                                                                               | 1.24113 | up | 2.85560 | up | 16.67777   | 13.91401  | 66.77265  | 20.61893  | Detected    | Compromised | Detected     | Detected    |
| 4016 | A_23_P86599    | DMBT1     | Hs.279611 | deleted in malignant brain tumors 1                | Homo sapiens deleted in malignant brain tumors 1 (DMBT1), transcript variant 2, mRNA [NM_007329]                                                                     | 1.24076 | up | 2.41950 | up | 24.70851   | 20.62015  | 18.65137  | 6.79753   | Detected    | Detected    | Detected     | Compromised |
| 4017 | A_23_P251974   | ZFYVE9    | Hs.532345 | zinc finger, FYVE domain containing 9              | Homo sapiens zinc finger, FYVE domain containing 9 (ZFYVE9), transcript variant 2, mRNA [NM_007323]                                                                  | 1.23870 | up | 2.04510 | up | 27.90012   | 23.32234  | 19.98520  | 8.61705   | Detected    | Detected    | Detected     | Compromised |
| 4018 | A_32_P118397   | HEPACAM2  | Hs.443169 | HEPACAM family member 2                            | Homo sapiens HEPACAM family member 2 (HEPACAM2), transcript variant 1, mRNA [NM_001039372]                                                                           | 1.23750 | up | 3.07223 | up | 17.98209   | 15.04626  | 10.17763  | 2.92118   | Detected    | Compromised | Compromised  | Compromised |
| 4019 | A_23_P10647    | CYTL1     | Hs.13872  | cytokine-like 1                                    | Homo sapiens cytokine-like 1 (CYTL1), mRNA [NM_018659]                                                                                                               | 1.23367 | up | 6.93400 | up | 4.79888    | 4.02784   | 24.12216  | 3.06760   | Compromised | Compromised | Not Detected | Compromised |

|      |               |              |           |                                                                                                                                  |                                                                                                                                                                                       |         |    |          |    |            |            |            |           |             |              |             |             |
|------|---------------|--------------|-----------|----------------------------------------------------------------------------------------------------------------------------------|---------------------------------------------------------------------------------------------------------------------------------------------------------------------------------------|---------|----|----------|----|------------|------------|------------|-----------|-------------|--------------|-------------|-------------|
| 4020 | A_33_P3292994 | LOC100131436 |           | hypothetical LOC100131436                                                                                                        | PREDICTED: Homo sapiens hypothetical LOC100131436 (LOC100131436), mRNA [XM_001720272]                                                                                                 | 1.23119 | up | 2.99752  | up | 4.04385    | 3.40097    | 33.98509   | 9.99752   | Compromised | Compromised  | Detected    | Compromised |
| 4021 | A_33_P3423420 | ZNF750       | Hs.653124 | zinc finger protein 750                                                                                                          | Homo sapiens zinc finger protein 750 (ZNF750), mRNA [NM_024702]                                                                                                                       | 1.22911 | up | 13.33363 | up | 6.00101    | 5.05555    | 49.01978   | 3.24182   | Compromised | Compromised  | Detected    | Compromised |
| 4022 | A_23_P118571  | SOST         | Hs.349204 | sclerosteosis                                                                                                                    | Homo sapiens sclerosteosis (SOST), mRNA [NM_025237]                                                                                                                                   | 1.22466 | up | 3.23268  | up | 21.52464   | 18.19920   | 18.17187   | 4.95681   | Detected    | Not Detected | Detected    | Compromised |
| 4023 | A_33_P3357530 | SLC12A7      | Hs.172613 | solute carrier family 12 (potassium/chloride transporters), member 7                                                             | Homo sapiens solute carrier family 12 (potassium/chloride transporters), member 7 (SLC12A7), mRNA [NM_006598]                                                                         | 1.22408 | up | 2.08645  | up | 2932.46200 | 2480.60280 | 1868.22020 | 789.56080 | Detected    | Detected     | Detected    | Detected    |
| 4024 | A_23_P128598  | TUBA3C       | Hs.349695 | tubulin, alpha 3c                                                                                                                | Homo sapiens tubulin, alpha 3c (TUBA3C), mRNA [NM_006001]                                                                                                                             | 1.21308 | up | 2.04083  | up | 1648.21250 | 1406.88170 | 892.21027  | 385.50220 | Detected    | Detected     | Detected    | Detected    |
| 4025 | A_33_P3306823 | ZNF846       | Hs.665717 | zinc finger protein 846                                                                                                          | Homo sapiens zinc finger protein 846 (ZNF846), mRNA [NM_001077824]                                                                                                                    | 1.20788 | up | 3.53874  | up | 14.85290   | 12.73272   | 11.89291   | 2.96350   | Detected    | Compromised  | Compromised | Compromised |
| 4026 | A_33_P3279820 |              |           |                                                                                                                                  |                                                                                                                                                                                       | 1.20767 | up | 2.29477  | up | 267.71410  | 229.53963  | 22.14985   | 8.51132   | Detected    | Detected     | Detected    | Compromised |
| 4027 | A_23_P150379  | MPZL2        | Hs.116651 | myelin protein zero-like 2                                                                                                       | Homo sapiens myelin protein zero-like 2 (MPZL2), transcript variant 2, mRNA [NM_144765]                                                                                               | 1.20536 | up | 2.93529  | up | 16.10715   | 13.83676   | 9.02084    | 2.70995   | Detected    | Compromised  | Compromised | Compromised |
| 4028 | A_33_P3885807 | LOC398875    | Hs.434602 | hypothetical gene supported by BC040220                                                                                          | Homo sapiens cDNA clone IMAGE:4822188 [BC040220]                                                                                                                                      | 1.20334 | up | 2.95283  | up | 26.32151   | 22.64927   | 12.74148   | 3.80494   | Detected    | Detected     | Compromised | Compromised |
| 4029 | A_33_P3375646 | GTPBP6       | Hs.437145 | GTP binding protein 6 (putative)                                                                                                 | Homo sapiens cDNA FLJ40553 fis, clone THYMU2002242, highly similar to Homo sapiens mRNA for GTP-binding protein [AK039722]                                                            | 1.20147 | up | 2.05255  | up | 88.89113   | 76.60871   | 31.55012   | 13.55420  | Detected    | Detected     | Detected    | Compromised |
| 4030 | A_33_P3889862 | LOC151475    | Hs.528154 | hypothetical protein LOC151475                                                                                                   | Homo sapiens cDNA FLJ30454 fis, clone BRACE2009311 [AK055016]                                                                                                                         | 1.20014 | up | 2.12194  | up | 25.53617   | 22.03210   | 19.62162   | 8.15393   | Detected    | Detected     | Detected    | Compromised |
| 4031 | A_33_P3251856 |              |           |                                                                                                                                  |                                                                                                                                                                                       | 1.19876 | up | 3.27646  | up | 17.21193   | 14.86723   | 19.80901   | 5.33118   | Detected    | Compromised  | Detected    | Compromised |
| 4032 | A_24_P148499  | CASP8        | Hs.599762 | caspase 8, apoptosis-related cysteine peptidase                                                                                  | Homo sapiens caspase 8, apoptosis-related cysteine peptidase (CASP8), transcript variant E, mRNA [NM_033358]                                                                          | 1.19845 | up | 2.42280  | up | 18.54948   | 16.02674   | 17.82007   | 6.48571   | Detected    | Detected     | Detected    | Compromised |
| 4033 | A_33_P3771899 |              | Hs.632826 |                                                                                                                                  | AGENCOURT.6773311.NH.MGC.128 Homo sapiens cDNA clone IMAGE:5811573 5', mRNA sequence [BQ278507]                                                                                       | 1.19691 | up | 2.11993  | up | 25.66982   | 22.20725   | 28.18316   | 11.72284  | Detected    | Detected     | Detected    | Compromised |
| 4034 | A_23_P255701  | LRRRC48      | Hs.579264 | leucine rich repeat containing 48                                                                                                | Homo sapiens leucine rich repeat containing 48 (LRRRC48), transcript variant 2, mRNA [NM_031284]                                                                                      | 1.19665 | up | 2.74855  | up | 13.27140   | 11.48371   | 11.00753   | 3.53144   | Detected    | Compromised  | Compromised | Compromised |
| 4035 | A_33_P3301097 |              |           |                                                                                                                                  |                                                                                                                                                                                       | 1.19160 | up | 3.15847  | up | 335.80208  | 291.62740  | 12.40597   | 3.46354   | Detected    | Detected     | Compromised | Compromised |
| 4036 | A_33_P3346966 | SPAG16       | Hs.602792 | sperm associated antigen 16                                                                                                      | Homo sapiens sperm associated antigen 16 (SPAG16), transcript variant 1, mRNA [NM_024532]                                                                                             | 1.19159 | up | 2.21048  | up | 23.50736   | 20.42728   | 55.72788   | 22.23059  | Detected    | Detected     | Detected    | Detected    |
| 4037 | A_33_P3260116 |              | Hs.550905 |                                                                                                                                  | Putative uncharacterized protein ENSP00000374967 [Source:UniProtKB/TrEMBL;Acc:AGNGS7] [ENST00000390460]                                                                               | 1.19039 | up | 2.87175  | up | 13.13297   | 11.42369   | 15.22825   | 4.67594   | Detected    | Compromised  | Detected    | Compromised |
| 4038 | A_23_P390032  | TMEM20       | Hs.632085 | transmembrane protein 20                                                                                                         | Homo sapiens transmembrane protein 20 (TMEM20), transcript variant 2, mRNA [NM_153226]                                                                                                | 1.18895 | up | 2.68716  | up | 95.73579   | 83.37634   | 128.48087  | 42.16102  | Detected    | Detected     | Detected    | Detected    |
| 4039 | A_33_P3233165 |              |           |                                                                                                                                  | Coiled-coil domain-containing protein 104 [Source:UniProtKB/Swiss-Prot;Acc:Q96Q28] [ENST00000406691]                                                                                  | 1.18784 | up | 4.28958  | up | 41.61646   | 36.27780   | 17.04373   | 3.50360   | Detected    | Detected     | Detected    | Compromised |
| 4040 | A_33_P3212350 | CARD11       | Hs.665701 | caspase recruitment domain family, member 11                                                                                     | Homo sapiens cDNA FLJ39820 fis, clone SPLEN2010625 [AK097139]                                                                                                                         | 1.18537 | up | 2.05626  | up | 57.13845   | 49.91240   | 67.23194   | 28.83119  | Detected    | Detected     | Detected    | Detected    |
| 4041 | A_33_P3346327 | KGFLP1       | Hs.721495 | keratinocyte growth factor-like protein 1                                                                                        | Homo sapiens keratinocyte growth factor-like protein 1 (KGFLP1), non-coding RNA [NR_003674]                                                                                           | 1.18504 | up | 2.88261  | up | 2799.55930 | 2446.18380 | 1728.74960 | 528.82480 | Detected    | Detected     | Detected    | Detected    |
| 4042 | A_33_P3697530 | SEMA4D       | Hs.494406 | sema domain, immunoglobulin domain (Ig), transmembrane domain (TM) and short cytoplasmic domain, (semaphorin) 4D (semaphorin) 4D | Homo sapiens sema domain, immunoglobulin domain (Ig), transmembrane domain (TM) and short cytoplasmic domain, (semaphorin) 4D (SEMA4D), transcript variant 2, mRNA [NM_001142287]     | 1.18287 | up | 3.05946  | up | 38.79379   | 33.95916   | 12.15434   | 3.50310   | Detected    | Detected     | Compromised | Compromised |
| 4043 | A_24_P357266  | GRPR         | Hs.567282 | gastrin-releasing peptide receptor                                                                                               | Homo sapiens gastrin-releasing peptide receptor (GRPR), mRNA [NM_005314]                                                                                                              | 1.18134 | up | 3.95536  | up | 4.24077    | 3.71708    | 17.97457   | 4.00717   | Compromised | Compromised  | Detected    | Compromised |
| 4044 | A_24_P92558   | ZNF674       | Hs.636105 | zinc finger family member 674                                                                                                    | Homo sapiens zinc finger family member 674 (ZNF674), transcript variant 1, mRNA [NM_001039891]                                                                                        | 1.18111 | up | 2.32884  | up | 51.45010   | 45.10558   | 8.00332    | 3.03037   | Detected    | Detected     | Compromised | Compromised |
| 4045 | A_24_P331704  | KRT80        | Hs.140978 | keratin 80                                                                                                                       | Homo sapiens keratin 80 (KRT80), transcript variant 1, mRNA [NM_182507]                                                                                                               | 1.18069 | up | 3.54960  | up | 41.88565   | 36.73359   | 33.41480   | 8.30090   | Detected    | Detected     | Detected    | Compromised |
| 4046 | A_33_P3309626 |              | Hs.513200 |                                                                                                                                  | A disintegrin and metalloproteinase with thrombospondin motifs 17 Precursor (ADAMTS-17)(ADAM-TS17)(ADAM-TS17)(EC 3.4.24.-) [Source:UniProtKB/Swiss-Prot;Acc:Q8TE56] [ENST00000378898] | 1.17955 | up | 2.04724  | up | 16.62743   | 14.59630   | 13.18001   | 5.67692   | Detected    | Compromised  | Compromised | Compromised |
| 4047 | A_23_P88880   | ZNF423       | Hs.530930 | zinc finger protein 423                                                                                                          | Homo sapiens zinc finger protein 423 (ZNF423), mRNA [NM_015069]                                                                                                                       | 1.17805 | up | 2.46312  | up | 95.23167   | 83.70467   | 39.43089   | 14.11618  | Detected    | Detected     | Detected    | Compromised |
| 4048 | A_33_P3305088 | LOC100129840 | Hs.688480 | hypothetical protein LOC100129840                                                                                                | Homo sapiens cDNA FLJ44675 fis, clone BRACE3007869 [AK126633]                                                                                                                         | 1.17590 | up | 2.06227  | up | 39.85045   | 35.09106   | 11.23891   | 4.80556   | Detected    | Detected     | Compromised | Compromised |
| 4049 | A_33_P3385837 | C10orf68     | Hs.585464 | chromosome 10 open reading frame 68                                                                                              | Homo sapiens chromosome 10 open reading frame 68 (C10orf68), mRNA [NM_024688]                                                                                                         | 1.17437 | up | 3.16610  | up | 20.04126   | 17.67061   | 19.81384   | 5.51836   | Detected    | Compromised  | Detected    | Compromised |
| 4050 | A_33_P3407157 |              | Hs.579287 |                                                                                                                                  | DB050195 TEST12 Homo sapiens cDNA clone TEST12039685 5', mRNA sequence [DB050195]                                                                                                     | 1.16943 | up | 2.38344  | up | 14.06528   | 12.45397   | 6.76471    | 2.50271   | Detected    | Compromised  | Compromised | Compromised |



|      |               |               |           |                                                                              |                                                                                                                                      |         |    |         |    |            |            |            |           |             |             |             |             |
|------|---------------|---------------|-----------|------------------------------------------------------------------------------|--------------------------------------------------------------------------------------------------------------------------------------|---------|----|---------|----|------------|------------|------------|-----------|-------------|-------------|-------------|-------------|
| 4051 | A_33_P3246635 | RP11-756A22.3 |           | transmembrane phosphoinositide 3-phosphatase and tensin homolog 2 pseudogene | Homo sapiens transmembrane phosphoinositide 3-phosphatase and tensin homolog 2 pseudogene [LOC646405], non-coding RNA [NR_026730]    | 1.16833 | up | 2.44176 | up | 24.46156   | 21.67962   | 19.83631   | 7.16346   | Detected    | Detected    | Detected    | Compromised |
| 4052 | A_23_P413585  | FOXD2         | Hs.166188 | forkhead box D2                                                              | Homo sapiens forkhead box D2 (FOXD2), mRNA [NM_004474]                                                                               | 1.16687 | up | 2.02196 | up | 71.13244   | 63.12175   | 35.13295   | 15.32175  | Detected    | Detected    | Detected    | Detected    |
| 4053 | A_23_P66137   | SOX8          | Hs.243678 | SRY (sex determining region Y)-box 8                                         | Homo sapiens SRY (sex determining region Y)-box 8 (SOX8), mRNA [NM_014587]                                                           | 1.16369 | up | 4.98778 | up | 4125.94400 | 3671.28320 | 1753.01230 | 309.91550 | Detected    | Detected    | Detected    | Detected    |
| 4054 | A_23_P18017   | CPA3          | Hs.646    | carboxypeptidase A3 (mast cell)                                              | Homo sapiens carboxypeptidase A3 (mast cell) (CPA3), mRNA [NM_001870]                                                                | 1.15339 | up | 2.02187 | up | 31.05916   | 27.88347   | 21.42946   | 9.34595   | Detected    | Detected    | Detected    | Compromised |
| 4055 | A_23_P69863   | PCDH5         | Hs.119693 | protocadherin beta 5                                                         | Homo sapiens protocadherin beta 5 (PCDH5), mRNA [NM_015669]                                                                          | 1.15307 | up | 2.22740 | up | 28.55352   | 25.64111   | 20.77180   | 8.22323   | Detected    | Detected    | Detected    | Compromised |
| 4056 | A_33_P3259712 |               |           |                                                                              | Putative uncharacterized protein O12orf33 [Source:UniProtKB/Swiss-Prot;Acc:Q8N8U2] [ENST00000399104]                                 | 1.15273 | up | 2.93408 | up | 36.30007   | 32.60730   | 19.28616   | 5.79614   | Detected    | Detected    | Detected    | Compromised |
| 4057 | A_23_P31407   | AGR2          | Hs.530009 | anterior gradient homolog 2 (Xenopus laevis)                                 | Homo sapiens anterior gradient homolog 2 (Xenopus laevis) (AGR2), mRNA [NM_006408]                                                   | 1.14833 | up | 2.35892 | up | 10.62380   | 9.57962    | 18.14266   | 6.78193   | Compromised | Compromised | Detected    | Compromised |
| 4058 | A_23_P20484   | FGL1          | Hs.491143 | fibrinogen-like 1                                                            | Homo sapiens fibrinogen-like 1 (FGL1), transcript variant 4, mRNA [NM_201553]                                                        | 1.14790 | up | 2.45599 | up | 22.02630   | 19.86875   | 8.54289    | 3.06721   | Detected    | Detected    | Compromised | Compromised |
| 4059 | A_24_P15658   | LYSMD3        | Hs.136235 | LysM, putative peptidoglycan-binding, domain containing 3                    | Homo sapiens LysM, putative peptidoglycan-binding, domain containing 3 (LYSMD3), mRNA [NM_198273]                                    | 1.14461 | up | 2.65762 | up | 59.62058   | 53.93506   | 7.93394    | 2.63246   | Detected    | Detected    | Compromised | Compromised |
| 4060 | A_33_P3313660 | BRD7P3        | Hs.648050 | bromodomain containing 7 pseudogene 3                                        | Homo sapiens bromodomain containing 7 pseudogene 3 (BRD7P3), non-coding RNA [NR_002730]                                              | 1.14399 | up | 2.17935 | up | 101.11929  | 91.52586   | 57.54833   | 23.28474  | Detected    | Detected    | Detected    | Detected    |
| 4061 | A_33_P3253361 | LOC644949     | Hs.631716 | hypothetical LOC644949                                                       | PREDICTED: Homo sapiens hypothetical LOC644949 (LOC644949), miscRNA [XR_040201]                                                      | 1.14299 | up | 3.20611 | up | 16.23381   | 14.70653   | 12.48870   | 3.43483   | Detected    | Compromised | Compromised | Compromised |
| 4062 | A_23_P170574  | SNAI3         | Hs.673548 | snail homolog 3 (Drosophila)                                                 | Homo sapiens snail homolog 3 (Drosophila) (SNAI3), mRNA [NM_178310]                                                                  | 1.13901 | up | 2.54125 | up | 22.02261   | 20.02051   | 10.15327   | 3.52310   | Detected    | Detected    | Compromised | Compromised |
| 4063 | A_23_P207774  | KSR1          | Hs.133534 | kinase suppressor of ras 1                                                   | Homo sapiens kinase suppressor of ras 1 (KSR1), mRNA [NM_014238]                                                                     | 1.13447 | up | 2.70013 | up | 8.77690    | 8.01092    | 13.83355   | 4.51767   | Compromised | Compromised | Detected    | Compromised |
| 4064 | A_24_P065538  | GGNBP1        | Hs.582973 | gametogenin binding protein 1                                                | Homo sapiens gametogenin binding protein 1 (GGNBP1), non-coding RNA [NR_028361]                                                      | 1.13276 | up | 2.83923 | up | 13.01637   | 11.89831   | 8.02828    | 2.49337   | Detected    | Compromised | Compromised | Compromised |
| 4065 | A_33_P3264940 | CXorf25       | Hs.582045 | chromosome X open reading frame 25                                           | PREDICTED: Homo sapiens chromosome X open reading frame 25 (CXorf25), miscRNA [XR_078588]                                            | 1.13274 | up | 2.06481 | up | 21.20039   | 19.37977   | 7.55514    | 3.22647   | Detected    | Detected    | Compromised | Compromised |
| 4066 | A_33_P3351499 |               |           |                                                                              |                                                                                                                                      | 1.12050 | up | 3.83535 | up | 28.61062   | 26.43931   | 12.36842   | 2.84364   | Detected    | Detected    | Compromised | Compromised |
| 4067 | A_33_P3283054 |               |           |                                                                              |                                                                                                                                      | 1.11815 | up | 2.58124 | up | 29.13552   | 26.98086   | 20.68610   | 7.06668   | Detected    | Detected    | Detected    | Compromised |
| 4068 | A_24_P77082   | KMO           | Hs.720069 | kynurenine 3-monoxygenase (kynurenine 3-hydroxylase)                         | Homo sapiens kynurenine 3-monoxygenase (kynurenine 3-hydroxylase) (KMO), mRNA [NM_003679]                                            | 1.11514 | up | 2.28575 | up | 19.81423   | 18.39842   | 7.93764    | 3.06216   | Detected    | Detected    | Compromised | Compromised |
| 4069 | A_23_P401106  | PDE2A         | Hs.503163 | phosphodiesterase 2A, cGMP-stimulated                                        | Homo sapiens phosphodiesterase 2A, cGMP-stimulated (PDE2A), transcript variant 1, mRNA [NM_002599]                                   | 1.10910 | up | 2.99285 | up | 500.68225  | 467.43744  | 389.42963  | 114.73867 | Detected    | Detected    | Detected    | Detected    |
| 4070 | A_33_P3334828 | INSL3         | Hs.37062  | insulin-like 3 (Leydig cell)                                                 | Homo sapiens insulin-like 3 (Leydig cell) (INSL3), mRNA [NM_005543]                                                                  | 1.10760 | up | 3.90376 | up | 570.97840  | 533.79060  | 369.93180  | 83.56109  | Detected    | Detected    | Detected    | Detected    |
| 4071 | A_33_P3379046 | LOC729770     | Hs.591612 | hypothetical protein LOC729770                                               | PREDICTED: Homo sapiens hypothetical protein LOC729770 (LOC729770), miscRNA [XR_041283]                                              | 1.10123 | up | 2.35802 | up | 1313.40100 | 1234.95900 | 134.67049  | 50.36055  | Detected    | Detected    | Detected    | Detected    |
| 4072 | A_24_P221968  | LOC643802     | Hs.451336 | similar to M-phase phosphoprotein 10 (U3 small nucleolar ribonucleoprotein)  | PREDICTED: Homo sapiens similar to M-phase phosphoprotein 10 (U3 small nucleolar ribonucleoprotein) (LOC643802), mRNA [XM_001716860] | 1.09726 | up | 3.24627 | up | 171.82118  | 162.14398  | 29.13746   | 7.91467   | Detected    | Detected    | Detected    | Compromised |
| 4073 | A_23_P346431  | FAM194A       | Hs.147128 | family with sequence similarity 194, member A                                | Homo sapiens family with sequence similarity 194, member A (FAM194A), mRNA [NM_152394]                                               | 1.09557 | up | 3.17428 | up | 46.00853   | 43.48435   | 43.29216   | 12.02624  | Detected    | Detected    | Detected    | Compromised |
| 4074 | A_23_P402331  | WFD5          | Hs.375031 | WAP four-disulfide core domain 5                                             | Homo sapiens WAP four-disulfide core domain 5 (WFD5), mRNA [NM_145632]                                                               | 1.08592 | up | 4.18215 | up | 14.24142   | 13.57964   | 25.79678   | 5.43916   | Detected    | Compromised | Detected    | Compromised |
| 4075 | A_33_P3389261 | TMEM194B      | Hs.659824 | transmembrane protein 194B                                                   | Homo sapiens transmembrane protein 194B (TMEM194B), mRNA [NM_001142645]                                                              | 1.08440 | up | 3.19511 | up | 26.23440   | 25.05034   | 60.52998   | 16.70513  | Detected    | Detected    | Detected    | Detected    |
| 4076 | A_33_P3424204 | DLEU2L        | Hs.547964 | deleted in lymphocytic leukemia 2-like                                       | Homo sapiens deleted in lymphocytic leukemia 2-like (DLEU2L), non-coding RNA [NR_002771]                                             | 1.06542 | up | 4.37822 | up | 25.46792   | 24.75173   | 16.21588   | 3.26594   | Detected    | Detected    | Detected    | Compromised |
| 4077 | A_33_P3239112 |               |           |                                                                              |                                                                                                                                      | 1.05781 | up | 3.13900 | up | 27.92028   | 27.33029   | 13.68500   | 3.84432   | Detected    | Detected    | Detected    | Compromised |
| 4078 | A_33_P3224078 | LOC442421     | Hs.585349 | hypothetical LOC442421                                                       | Homo sapiens hypothetical LOC442421 (LOC442421), non-coding RNA [NR_024496]                                                          | 1.05743 | up | 2.50896 | up | 17.34410   | 16.98378   | 12.05569   | 4.23705   | Detected    | Compromised | Compromised | Compromised |
| 4079 | A_23_P218369  | CCL14         | Hs.714858 | chemokine (C-C motif) ligand 14                                              | Homo sapiens chemokine (C-C motif) ligand 14 (CCL14), transcript variant 3, mRNA [NM_032963]                                         | 1.05714 | up | 2.54096 | up | 19.06380   | 18.67284   | 7.78236    | 2.70071   | Detected    | Detected    | Compromised | Compromised |
| 4080 | A_32_P78681   | GLP2R         | Hs.248202 | glucagon-like peptide 2 receptor                                             | Glucagon-like peptide 2 receptor Precursor (GLP-2 receptor)(GLP-2R) [Source:UniProtKB/Swiss-Prot;Acc:O95838] [ENST00000262441]       | 1.05714 | up | 2.23792 | up | 144.45564  | 141.49316  | 35.91961   | 14.15311  | Detected    | Detected    | Detected    | Compromised |
| 4081 | A_33_P3333364 |               | Hs.572894 |                                                                              | V1-20 protein fragment [Source:UniProtKB/TrEMBL;Acc:G5NV86] [ENST00000390287]                                                        | 1.05372 | up | 3.49478 | up | 4.80212    | 4.71889    | 12.57025   | 3.17168   | Compromised | Compromised | Detected    | Compromised |

|      |               |              |           |                                                                                          |                                                                                                                                        |           |      |            |      |           |             |           |             |             |             |             |             |
|------|---------------|--------------|-----------|------------------------------------------------------------------------------------------|----------------------------------------------------------------------------------------------------------------------------------------|-----------|------|------------|------|-----------|-------------|-----------|-------------|-------------|-------------|-------------|-------------|
| 4082 | A_33_P3211432 | NCF1         | Hs.647047 | neutrophil cytosolic factor 1                                                            | Homo sapiens neutrophil cytosolic factor 1 (NCF1), mRNA [NM_000265]                                                                    | 1.05046   | up   | 2.39313    | up   | 13.00003  | 12.81434    | 7.00201   | 2.58001     | Detected    | Compromised | Compromised | Compromised |
| 4083 | A_33_P3213169 |              |           |                                                                                          |                                                                                                                                        | 1.04952   | up   | 3.09447    | up   | 9.98022   | 9.84647     | 18.63347  | 5.30973     | Compromised | Compromised | Detected    | Compromised |
| 4084 | A_24_P82074   | CPSF2        | Hs.657632 | cleavage and polyadenylation specific factor 2, 100kDa                                   | Homo sapiens cleavage and polyadenylation specific factor 2, 100kDa (CPSF2), mRNA [NM_017437]                                          | 1.04326   | up   | 2.23604    | up   | 65.92038  | 65.42741    | 33.87412  | 13.35839    | Detected    | Detected    | Detected    | Compromised |
| 4085 | A_23_P170901  | PACRG        | Hs.25791  | PARK2 co-regulated                                                                       | Homo sapiens PARK2 co-regulated (PACRG), transcript variant 1, mRNA [NM_152410]                                                        | 1.04280   | up   | 2.17008    | up   | 171.63547 | 170.42796   | 97.84258  | 39.75740    | Detected    | Detected    | Detected    | Detected    |
| 4086 | A_33_P3248394 | INMT         | Hs.632629 | indolethylamine N-methyltransferase                                                      | Homo sapiens indolethylamine N-methyltransferase (INMT), mRNA [NM_006774]                                                              | 1.04144   | up   | 2.26476    | up   | 46.21958  | 45.95400    | 16.62619  | 6.47346     | Detected    | Detected    | Detected    | Compromised |
| 4087 | A_23_P46215   | TRIM46       | Hs.287735 | tripartite motif-containing 46                                                           | Homo sapiens tripartite motif-containing 46 (TRIM46), mRNA [NM_025058]                                                                 | 1.04120   | up   | 2.02810    | up   | 27.92592  | 27.77200    | 30.91382  | 13.44092    | Detected    | Detected    | Detected    | Compromised |
| 4088 | A_33_P3326634 | GPC3         | Hs.644108 | glypican 3                                                                               | Homo sapiens glypican 3 (GPC3), transcript variant 1, mRNA [NM_001164617]                                                              | 1.04102   | up   | 2.07995    | up   | 21.94096  | 21.82385    | 18.75371  | 7.95061     | Detected    | Detected    | Detected    | Compromised |
| 4089 | A_33_P3239914 | LOC100130741 | Hs.661989 | hypothetical protein LOC100130741                                                        | Homo sapiens cDNA FLJ45289 fis, clone BRHIP3002363, [AK127222]                                                                         | 1.03910   | up   | 2.06601    | up   | 16.58241  | 16.50435    | 13.50233  | 5.76292     | Detected    | Compromised | Compromised | Compromised |
| 4090 | A_33_P3409944 | GNAT2        | Hs.36973  | guanine nucleotide binding protein (G protein), alpha transducing activity polypeptide 2 | Homo sapiens guanine nucleotide binding protein (G protein), alpha transducing activity polypeptide 2 (GNAT2), mRNA [NM_005272]        | 1.03658   | up   | 2.65162    | up   | 15.46641  | 15.44964    | 16.66748  | 5.54274     | Detected    | Compromised | Detected    | Compromised |
| 4091 | A_33_P3356577 |              |           |                                                                                          | Signal-regulatory protein beta-1 isoform 3 Precursor (SIRP-beta-1 isoform 3) [Source:UniProtKB/Swiss-Prot;Acc:Q5TFQ8] [ENST0000381596] | 1.03043   | up   | 2.11286    | up   | 49.20210  | 49.44240    | 48.36412  | 20.18453    | Detected    | Detected    | Detected    | Detected    |
| 4092 | A_33_P3248004 |              | Hs.559970 |                                                                                          | Uncharacterized protein FLJ41423 [Source:UniProtKB/Swiss-Prot;Acc:A1L4Q6] [ENST00000442308]                                            | 1.02190   | up   | 2.79936    | up   | 28.50503  | 28.88320    | 17.06128  | 5.37426     | Detected    | Detected    | Detected    | Compromised |
| 4093 | A_33_P3406661 | TMEM63C      | Hs.22452  | transmembrane protein 63C                                                                | Homo sapiens transmembrane protein 63C (TMEM63C), mRNA [NM_020431]                                                                     | 1.02160   | up   | 2.73037    | up   | 15.07922  | 15.28385    | 10.19408  | 3.29224     | Detected    | Compromised | Compromised | Compromised |
| 4094 | A_33_P3403913 |              | Hs.633945 |                                                                                          | H.sapiens mRNA sequence (16p11.2) [X69637]                                                                                             | 1.01413   | up   | 2.73118    | up   | 9.86891   | 10.07647    | 14.19159  | 4.58191     | Compromised | Compromised | Detected    | Compromised |
| 4095 | A_23_P24676   | OR8U1        | Hs.553618 | olfactory receptor, family 8, subfamily U, member 1                                      | Homo sapiens olfactory receptor, family 8, subfamily U, member 1 (OR8U1), mRNA [NM_001005204]                                          | 1.01195   | up   | 2.38763    | up   | 34.29009  | 35.08670    | 8.85800   | 3.27140     | Detected    | Detected    | Compromised | Compromised |
| 4096 | A_23_P166566  | CCDC48       | Hs.134807 | coiled-coil domain containing 48                                                         | Homo sapiens coiled-coil domain containing 48 (CCDC48), mRNA [NM_024768]                                                               | 1.01004   | up   | 5.12131    | up   | 54.66911  | 56.04485    | 18.39978  | 3.16809     | Detected    | Detected    | Detected    | Compromised |
| 4097 | A_24_P392632  | TRPM3        | Hs.47288  | transient receptor potential cation channel, subfamily M, member 3                       | Homo sapiens transient receptor potential cation channel, subfamily M, member 3 (TRPM3), transcript variant 7, mRNA [NM_206948]        | 1.00802   | up   | 3.59459    | up   | 3.19016   | 3.27700     | 19.58200  | 4.80367     | Compromised | Compromised | Detected    | Compromised |
| 4098 | A_23_P69310   | CCRL2        | Hs.535713 | chemokine (C-C motif) receptor-like 2                                                    | Homo sapiens chemokine (C-C motif) receptor-like 2 (CCRL2), transcript variant 1, mRNA [NM_003965]                                     | 1.00623   | up   | 2.72505    | up   | 35.68720  | 36.72383    | 35.79386  | 11.58241    | Detected    | Detected    | Detected    | Compromised |
| 4099 | A_23_P313278  |              | Hs.489354 |                                                                                          | Mucin-3B Fragment (MUC-3B) [Intestinal mucin-3B] [Source:UniProtKB/Swiss-Prot;Acc:Q9H196] [ENST00000318909]                            | 1.00483   | up   | 3.40874    | up   | 17.64934  | 18.18739    | 10.32491  | 2.67090     | Detected    | Detected    | Compromised | Compromised |
| 4100 | A_24_P124558  | HOXC8        | Hs.664500 | homeobox C8                                                                              | Homo sapiens homeobox C8 (HOXC8), mRNA [NM_022658]                                                                                     | 594.18225 | down | 534.99910  | down | 4.66344   | 2869.18900  | 2.62351   | 1237.66160  | Compromised | Detected    | Compromised | Detected    |
| 4101 | A_23_P500998  | HOXA9        | Hs.659350 | homeobox A9                                                                              | Homo sapiens homeobox A9 (HOXA9), mRNA [NM_152739]                                                                                     | 592.35516 | down | 493.90430  | down | 3.55414   | 2179.96880  | 3.05108   | 1328.80490  | Compromised | Detected    | Compromised | Detected    |
| 4102 | A_23_P70968   | HOXA7        | Hs.660918 | homeobox A7                                                                              | Homo sapiens homeobox A7 (HOXA7), mRNA [NM_006896]                                                                                     | 547.44600 | down | 274.53156  | down | 6.21965   | 3525.65870  | 5.44903   | 1319.09750  | Compromised | Detected    | Compromised | Detected    |
| 4103 | A_23_P363316  | HOXB5        | Hs.654456 | homeobox B5                                                                              | Homo sapiens homeobox B5 (HOXB5), mRNA [NM_002147]                                                                                     | 489.89343 | down | 455.47385  | down | 3.73538   | 1894.82500  | 3.04086   | 1221.30730  | Compromised | Detected    | Compromised | Detected    |
| 4104 | A_33_P3341686 | XIST         | Hs.529901 | X (inactive)-specific transcript (non-protein coding)                                    | Homo sapiens X (inactive)-specific transcript (non-protein coding) (XIST), non-coding RNA [NR_001564]                                  | 406.94977 | down | 1106.65300 | down | 17.06895  | 7192.51030  | 4.66421   | 4551.50000  | Detected    | Detected    | Compromised | Detected    |
| 4105 | A_23_P66682   | HOXB6        | Hs.98428  | homeobox B6                                                                              | Homo sapiens homeobox B6 (HOXB6), mRNA [NM_018952]                                                                                     | 385.91574 | down | 1998.17210 | down | 44.43997  | 17758.20900 | 6.01446   | 10597.29500 | Detected    | Detected    | Compromised | Detected    |
| 4106 | A_23_P148541  | CTAG1A       | Hs.534310 | cancer/testis antigen 1A                                                                 | Homo sapiens cancer/testis antigen 1A (CTAG1A), mRNA [NM_139250]                                                                       | 249.25270 | down | 577.00867  | down | 93.85477  | 24223.07800 | 35.34504  | 17983.58200 | Detected    | Detected    | Detected    | Detected    |
| 4107 | A_33_P3300965 | HOXC6        | Hs.549040 | homeobox C6                                                                              | Homo sapiens homeobox C6 (HOXC6), transcript variant 2, mRNA [NM_153693]                                                               | 247.46118 | down | 651.67040  | down | 33.13974  | 8491.59500  | 10.06871  | 5785.85300  | Detected    | Detected    | Compromised | Detected    |
| 4108 | A_23_P7727    | HAPLN1       | Hs.2799   | hyaluronan and proteoglycan link protein 1                                               | Homo sapiens hyaluronan and proteoglycan link protein 1 (HAPLN1), mRNA [NM_001884]                                                     | 241.03157 | down | 175.28838  | down | 2.67364   | 667.28190   | 2.98504   | 461.39066   | Compromised | Detected    | Compromised | Detected    |
| 4109 | A_24_P77904   | HOXA10       | Hs.110637 | homeobox A10                                                                             | Homo sapiens homeobox A10 (HOXA10), transcript variant 1, mRNA [NM_018951]                                                             | 212.57760 | down | 101.90968  | down | 2.51297   | 553.14400   | 2.69428   | 242.11569   | Compromised | Detected    | Compromised | Detected    |
| 4110 | A_23_P7313    | SPP1         | Hs.313    | secreted phosphoprotein 1                                                                | Homo sapiens secreted phosphoprotein 1 (SPP1), transcript variant 1, mRNA [NM_001040058]                                               | 170.12749 | down | 197.49605  | down | 5.62395   | 990.71533   | 4.06797   | 708.43726   | Compromised | Detected    | Compromised | Detected    |
| 4111 | A_23_P374695  | TEK          | Hs.89640  | TEK tyrosine kinase, endothelial                                                         | Homo sapiens TEK tyrosine kinase, endothelial (TEK), mRNA [NM_000459]                                                                  | 168.16338 | down | 99.82339   | down | 4.01029   | 698.29730   | 4.52445   | 398.25705   | Compromised | Detected    | Compromised | Detected    |
| 4112 | A_33_P3264528 | HOXA11       | Hs.249171 | homeobox A11                                                                             | Homo sapiens homeobox A11 (HOXA11), mRNA [NM_005523]                                                                                   | 135.72766 | down | 157.62318  | down | 2.86949   | 403.27990   | 2.75836   | 383.38577   | Compromised | Detected    | Compromised | Detected    |
| 4113 | A_33_P3300975 | HOXC4        | Hs.549040 | homeobox C4                                                                              | Homo sapiens homeobox C4 (HOXC4), transcript variant 1, mRNA [NM_014620]                                                               | 131.16129 | down | 304.63330  | down | 7.26983   | 967.33136   | 2.57020   | 690.41327   | Compromised | Detected    | Compromised | Detected    |
| 4114 | A_24_P264943  | COMP         | Hs.1584   | cartilage oligomeric matrix protein                                                      | Homo sapiens cartilage oligomeric matrix protein (COMP), mRNA [NM_000095]                                                              | 128.96592 | down | 201.15356  | down | 308.84100 | 40602.72700 | 239.12202 | 42414.35000 | Detected    | Detected    | Detected    | Detected    |

|      |               |          |           |                                                                      |                                                                                                                      |           |      |           |      |            |              |            |              |             |          |             |          |
|------|---------------|----------|-----------|----------------------------------------------------------------------|----------------------------------------------------------------------------------------------------------------------|-----------|------|-----------|------|------------|--------------|------------|--------------|-------------|----------|-------------|----------|
| 4115 | A_23_P256956  | KIF20A   | Hs.718626 | kinesin family member 20A                                            | Homo sapiens kinesin family member 20A (KIF20A), mRNA [NM_005733]                                                    | 124.42455 | down | 110.00188 | down | 18.31738   | 2359.94800   | 16.03709   | 1555.57620   | Detected    | Detected | Detected    | Detected |
| 4116 | A_23_P25150   | HOXC9    | Hs.658823 | homeobox C9                                                          | Homo sapiens homeobox C9 (HOXC9), mRNA [NM_006897]                                                                   | 122.49983 | down | 222.03098 | down | 52.65937   | 6679.50440   | 23.26092   | 4554.13600   | Detected    | Detected | Detected    | Detected |
| 4117 | A_24_P218805  | HOXC10   | Hs.44276  | homeobox C10                                                         | Homo sapiens homeobox C10 (HOXC10), mRNA [NM_017409]                                                                 | 116.49500 | down | 100.85654 | down | 2.27947    | 274.96307    | 2.37521    | 211.23755    | Compromised | Detected | Compromised | Detected |
| 4118 | A_23_P51085   | SPC25    | Hs.421956 | SPC25, NDC80 kinetochore complex component, homolog (S. cerevisiae)  | Homo sapiens SPC25, NDC80 kinetochore complex component, homolog (S. cerevisiae) (SPC25), mRNA [NM_020675]           | 111.57378 | down | 142.18135 | down | 98.13633   | 11337.70200  | 62.00933   | 7774.36960   | Detected    | Detected | Detected    | Detected |
| 4119 | A_24_P319613  | NEK2     | Hs.153704 | NIMA (never in mitosis gene a)-related kinase 2                      | Homo sapiens NIMA (never in mitosis gene a)-related kinase 2 (NEK2), mRNA [NM_002497]                                | 107.40808 | down | 71.96903  | down | 3.01208    | 334.99344    | 3.40980    | 216.39153    | Compromised | Detected | Compromised | Detected |
| 4120 | A_33_P3318343 | CTAG2    | Hs.87225  | cancer/testis antigen 2                                              | Homo sapiens cancer/testis antigen 2 (CTAG2), transcript variant 2, mRNA [NM_020994]                                 | 104.32980 | down | 144.68315 | down | 62.47739   | 6749.38800   | 50.49297   | 6441.90500   | Detected    | Detected | Detected    | Detected |
| 4121 | A_23_P55281   | HOXB7    | Hs.436181 | homeobox B7                                                          | Homo sapiens homeobox B7 (HOXB7), mRNA [NM_004502]                                                                   | 98.93823  | down | 44.19750  | down | 2.50469    | 256.59653    | 2.77442    | 108.12709    | Compromised | Detected | Compromised | Detected |
| 4122 | A_23_P35219   | NEK2     | Hs.153704 | NIMA (never in mitosis gene a)-related kinase 2                      | Homo sapiens NIMA (never in mitosis gene a)-related kinase 2 (NEK2), mRNA [NM_002497]                                | 96.84769  | down | 146.36285 | down | 12.15671   | 1219.09720   | 8.98012    | 1158.98720   | Detected    | Detected | Compromised | Detected |
| 4123 | A_33_P3276918 | FAM64A   | Hs.592116 | family with sequence similarity 64, member A                         | Homo sapiens family with sequence similarity 64, member A (FAM64A), mRNA [NM_019013]                                 | 95.78413  | down | 182.53444 | down | 21.28121   | 2110.68300   | 14.51748   | 2336.69260   | Detected    | Detected | Detected    | Detected |
| 4124 | A_33_P3421243 | AFP      | Hs.518808 | alpha-fetoprotein                                                    | Homo sapiens alpha-fetoprotein (AFP), mRNA [NM_001134]                                                               | 91.34399  | down | 55.39948  | down | 4.93107    | 466.39575    | 6.94193    | 339.11865    | Compromised | Detected | Compromised | Detected |
| 4125 | A_23_P118174  | PLK1     | Hs.592049 | polo-like kinase 1 (Drosophila)                                      | Homo sapiens polo-like kinase 1 (Drosophila) (PLK1), mRNA [NM_005030]                                                | 91.00964  | down | 131.35895 | down | 27.14974   | 2558.50440   | 23.68674   | 2743.66100   | Detected    | Detected | Detected    | Detected |
| 4126 | A_23_P43164   | SULF1    | Hs.409602 | sulfatase 1                                                          | Homo sapiens sulfatase 1 (SULF1), transcript variant 3, mRNA [NM_015170]                                             | 87.87735  | down | 98.15596  | down | 242.28316  | 22046.17600  | 155.72363  | 13478.34900  | Detected    | Detected | Detected    | Detected |
| 4127 | A_23_P118815  | BIRC5    | Hs.514527 | baculoviral IAP repeat-containing 5                                  | Homo sapiens baculoviral IAP repeat-containing 5 (BIRC5), transcript variant 3, mRNA [NM_001012271]                  | 84.09252  | down | 99.25370  | down | 897.69434  | 78166.19500  | 630.66320  | 55196.27000  | Detected    | Detected | Detected    | Detected |
| 4128 | A_23_P118842  | KRTAP1-5 | Hs.534499 | keratin associated protein 1-5                                       | Homo sapiens keratin associated protein 1-5 (KRTAP1-5), mRNA [NM_031957]                                             | 82.79930  | down | 107.79884 | down | 69.21690   | 5934.33300   | 38.83360   | 3691.36670   | Detected    | Detected | Detected    | Detected |
| 4129 | A_33_P3307495 | STRA6    | Hs.24553  | stimulated by retinoic acid gene 6 homolog (mouse)                   | Homo sapiens stimulated by retinoic acid gene 6 homolog (mouse) (STRA6), transcript variant 1, mRNA [NM_001142617]   | 81.89140  | down | 93.67407  | down | 24.68651   | 2093.29790   | 17.08419   | 1411.16990   | Detected    | Detected | Detected    | Detected |
| 4130 | A_23_P79302   | LYPD6B   | Hs.357567 | LY6/PLAUR domain containing 6B                                       | Homo sapiens LY6/PLAUR domain containing 6B (LYPD6B), mRNA [NM_177964]                                               | 81.38724  | down | 43.41795  | down | 2.33069    | 196.41484    | 6.15036    | 235.46982    | Compromised | Detected | Compromised | Detected |
| 4131 | A_23_P88331   | DLGAP5   | Hs.77695  | discs, large (Drosophila) homolog-associated protein 5               | Homo sapiens discs, large (Drosophila) homolog-associated protein 5 (DLGAP5), transcript variant 1, mRNA [NM_014750] | 80.77577  | down | 96.99825  | down | 74.09805   | 6197.56400   | 68.34229   | 5845.46300   | Detected    | Detected | Detected    | Detected |
| 4132 | A_33_P3387524 | DEPDC1   | Hs.445098 | DEP domain containing 1                                              | Homo sapiens DEP domain containing 1 (DEPDC1), transcript variant 1, mRNA [NM_001114120]                             | 78.75519  | down | 21.32339  | down | 2.93570    | 239.39984    | 3.27743    | 61.62465     | Compromised | Detected | Compromised | Detected |
| 4133 | A_33_P3245218 | ODZ2     | Hs.631957 | odt, odd Oz/ten-m homolog 2 (Drosophila)                             | Homo sapiens odt, odd Oz/ten-m homolog 2 (Drosophila) (ODZ2), mRNA [NM_001122679]                                    | 78.10015  | down | 136.65773 | down | 5.73433    | 463.73224    | 2.67215    | 322.00372    | Compromised | Detected | Compromised | Detected |
| 4134 | A_23_P370588  | HOXB8    | Hs.514292 | homeobox B8                                                          | Homo sapiens homeobox B8 (HOXB8), mRNA [NM_024016]                                                                   | 76.56639  | down | 23.89782  | down | 2.33384    | 185.03010    | 2.46445    | 51.93295     | Compromised | Detected | Compromised | Detected |
| 4135 | A_32_P96719   | SHCBP1   | Hs.123253 | SHC SH2-domain binding protein 1                                     | Homo sapiens SHC SH2-domain binding protein 1 (SHCBP1), mRNA [NM_024745]                                             | 75.35630  | down | 91.03244  | down | 49.26647   | 3844.18380   | 33.25931   | 2669.77690   | Detected    | Detected | Detected    | Detected |
| 4136 | A_23_P141624  | KRTAP1-1 | Hs.247934 | keratin associated protein 1-1                                       | Homo sapiens keratin associated protein 1-1 (KRTAP1-1), mRNA [NM_030967]                                             | 72.83463  | down | 52.05777  | down | 2.34718    | 177.01785    | 2.48257    | 113.95988    | Compromised | Detected | Compromised | Detected |
| 4137 | A_23_P65757   | CCNB2    | Hs.194698 | cyclin B2                                                            | Homo sapiens cyclin B2 (CCNB2), mRNA [NM_004701]                                                                     | 71.74918  | down | 79.26724  | down | 487.13727  | 36191.06200  | 315.03323  | 22019.91600  | Detected    | Detected | Detected    | Detected |
| 4138 | A_23_P35871   | E2F8     | Hs.523526 | E2F transcription factor 8                                           | Homo sapiens E2F transcription factor 8 (E2F8), mRNA [NM_024680]                                                     | 71.73170  | down | 34.99167  | down | 2.91475    | 216.49382    | 3.26183    | 100.64499    | Compromised | Detected | Compromised | Detected |
| 4139 | A_33_P3288159 | ASPM     | Hs.121028 | asp (abnormal spindle) homolog, microcephaly associated (Drosophila) | Homo sapiens asp (abnormal spindle) homolog, microcephaly associated (Drosophila) (ASPM), mRNA [NM_018136]           | 71.65447  | down | 143.60994 | down | 38.55512   | 2860.60820   | 11.57788   | 1466.15250   | Detected    | Detected | Compromised | Detected |
| 4140 | A_24_P323598  | ESCO2    | Hs.99480  | establishment of cohesion 1 homolog 2 (S. cerevisiae)                | Homo sapiens establishment of cohesion 1 homolog 2 (S. cerevisiae) (ESCO2), mRNA [NM_001017420]                      | 69.80357  | down | 79.51831  | down | 4.74371    | 342.86966    | 3.38835    | 237.58604    | Compromised | Detected | Compromised | Detected |
| 4141 | A_23_P107421  | TK1      | Hs.515122 | thymidine kinase 1, soluble                                          | Homo sapiens thymidine kinase 1, soluble (TK1), mRNA [NM_003258]                                                     | 68.75995  | down | 79.18738  | down | 1940.31380 | 138146.73000 | 1558.03670 | 108792.55000 | Detected    | Detected | Detected    | Detected |
| 4142 | A_33_P3291831 | CEP55    | Hs.14559  | centrosomal protein 55kDa                                            | Homo sapiens centrosomal protein 55kDa (CEP55), transcript variant 1, mRNA [NM_018131]                               | 68.03040  | down | 91.99155  | down | 19.57336   | 1378.80080   | 10.99036   | 891.50810    | Detected    | Detected | Compromised | Detected |
| 4143 | A_23_P155711  | NEIL3    | Hs.405467 | nei endonuclease VIII-like 3 (E. coli)                               | Homo sapiens nei endonuclease VIII-like 3 (E. coli) (NEIL3), mRNA [NM_018248]                                        | 67.63126  | down | 54.69765  | down | 3.82752    | 268.03870    | 3.23333    | 155.94969    | Compromised | Detected | Compromised | Detected |
| 4144 | A_23_P215634  | IGFBP3   | Hs.450230 | insulin-like growth factor binding protein 3                         | Homo sapiens insulin-like growth factor binding protein 3 (IGFBP3), transcript variant 1, mRNA [NM_001013398]        | 67.36516  | down | 66.17660  | down | 1824.75790 | 127283.97000 | 1505.56410 | 87855.55500  | Detected    | Detected | Detected    | Detected |
| 4145 | A_23_P45011   | PPP1R14C | Hs.486798 | protein phosphatase 1, regulatory (inhibitor) subunit 14C            | Homo sapiens protein phosphatase 1, regulatory (inhibitor) subunit 14C (PPP1R14C), mRNA [NM_030949]                  | 66.81310  | down | 93.42963  | down | 29.65725   | 2051.75500   | 24.85876   | 2047.99870   | Detected    | Detected | Detected    | Detected |
| 4146 | A_23_P316511  | HOXB3    | Hs.654560 | homeobox B3                                                          | Homo sapiens homeobox B3 (HOXB3), mRNA [NM_002146]                                                                   | 65.99564  | down | 33.93036  | down | 2.28753    | 156.32037    | 4.18601    | 125.24307    | Compromised | Detected | Compromised | Detected |

|      |               |              |           |                                                                                   |                                                                                                                          |          |      |          |      |           |             |           |             |             |          |             |          |
|------|---------------|--------------|-----------|-----------------------------------------------------------------------------------|--------------------------------------------------------------------------------------------------------------------------|----------|------|----------|------|-----------|-------------|-----------|-------------|-------------|----------|-------------|----------|
| 4147 | A_23_P52017   | ASPM         | Hs.121028 | asp (abnormal spindle) homolog, microcephaly associated (Drosophila)              | Homo sapiens asp (abnormal spindle) homolog, microcephaly associated (Drosophila) (ASPM), mRNA [NM_018136]               | 65.81075 | down | 70.01885 | down | 157.07414 | 10703.71700 | 108.06260 | 6671.99800  | Detected    | Detected | Detected    | Detected |
| 4148 | A_23_P126212  | CLSPN        | Hs.175613 | claspin homolog (Xenopus laevis)                                                  | Homo sapiens claspin homolog (Xenopus laevis) (CLSPN), mRNA [NM_022111]                                                  | 65.52806 | down | 46.68759 | down | 2.25390   | 152.93062   | 2.33282   | 96.03928    | Compromised | Detected | Compromised | Detected |
| 4149 | A_23_P138507  | CDC2         | Hs.334562 | cell division cycle 2, G1 to S and G2 to M                                        | Homo sapiens cell division cycle 2, G1 to S and G2 to M (CDC2), transcript variant 1, mRNA [NM_0010786]                  | 62.70113 | down | 68.01745 | down | 119.53158 | 7760.52200  | 82.25016  | 4933.13040  | Detected    | Detected | Detected    | Detected |
| 4150 | A_23_P398854  | DOK7         | Hs.122110 | docking protein 7                                                                 | Homo sapiens docking protein 7 (DOK7), transcript variant 1, mRNA [NM_173660]                                            | 62.14818 | down | 34.53328 | down | 2.55532   | 164.43954   | 3.03850   | 92.52573    | Compromised | Detected | Compromised | Detected |
| 4151 | A_24_P37253   | LYPD6        | Hs.21929  | LY6/PLAUR domain containing 6                                                     | Homo sapiens LY6/PLAUR domain containing 6 (LYPD6), mRNA [NM_194317]                                                     | 62.11988 | down | 32.23157 | down | 2.63021   | 169.18219   | 3.09921   | 88.08434    | Compromised | Detected | Compromised | Detected |
| 4152 | A_33_P3271273 | HOXB2        | Hs.514289 | homeobox B2                                                                       | Homo sapiens homeobox B2 (HOXB2), mRNA [NM_002145]                                                                       | 60.37445 | down | 43.52597 | down | 23.25287  | 1453.65990  | 18.20533  | 698.73505   | Detected    | Detected | Detected    | Detected |
| 4153 | A_33_P3313075 | LOC100129619 | Hs.714179 | hypothetical LOC100129619                                                         | PREDICTED: Homo sapiens hypothetical LOC100129619 (LOC100129619), mRNA [XM_00171266]                                     | 59.50954 | down | 60.80922 | down | 5.94992   | 366.63214   | 11.18512  | 599.75740   | Compromised | Detected | Compromised | Detected |
| 4154 | A_23_P34788   | KIF2C        | Hs.720061 | kinesin family member 2C                                                          | Homo sapiens kinesin family member 2C (KIF2C), mRNA [NM_006845]                                                          | 59.41870 | down | 69.13573 | down | 273.92862 | 16853.63900 | 207.39778 | 12643.64200 | Detected    | Detected | Detected    | Detected |
| 4155 | A_24_P299474  | ODZ2         | Hs.631957 | odz, odd Oz/ten-m homolog 2 (Drosophila)                                          | Homo sapiens odz, odd Oz/ten-m homolog 2 (Drosophila) (ODZ2), mRNA [NM_001122679]                                        | 58.33110 | down | 88.31049 | down | 17.59517  | 1062.73900  | 8.75273   | 681.58655   | Detected    | Detected | Compromised | Detected |
| 4156 | A_23_P70249   | CDC25C       | Hs.656    | cell division cycle 25 homolog C (S. pombe)                                       | Homo sapiens cell division cycle 25 homolog C (S. pombe) (CDC25C), transcript variant 1, mRNA [NM_001790]                | 58.22949 | down | 70.52467 | down | 30.77745  | 1855.70400  | 18.09614  | 1125.36250  | Detected    | Detected | Detected    | Detected |
| 4157 | A_23_P115872  | CEP55        | Hs.14559  | centrosomal protein 55kDa                                                         | Homo sapiens centrosomal protein 55kDa (CEP55), transcript variant 1, mRNA [NM_018131]                                   | 57.81258 | down | 59.26899 | down | 178.33205 | 10675.41700 | 124.08308 | 6484.93360  | Detected    | Detected | Detected    | Detected |
| 4158 | A_33_P3377529 | HOXA4        | Hs.533357 | homeobox A4                                                                       | Homo sapiens homeobox A4 (HOXA4), mRNA [NM_002141]                                                                       | 57.78450 | down | 98.33543 | down | 6.40620   | 383.30520   | 2.64844   | 229.64958   | Compromised | Detected | Compromised | Detected |
| 4159 | A_33_P3807062 | HJURP        | Hs.532968 | Holliday junction recognition protein                                             | Homo sapiens Holliday junction recognition protein (HJURP), mRNA [NM_018410]                                             | 56.66154 | down | 56.32617 | down | 274.61868 | 16112.07700 | 196.39200 | 9754.37600  | Detected    | Detected | Detected    | Detected |
| 4160 | A_23_P57588   | GTSE1        | Hs.386189 | G-2 and S-phase expressed 1                                                       | Homo sapiens G-2 and S-phase expressed 1 (GTSE1), mRNA [NM_016426]                                                       | 56.62428 | down | 52.05822 | down | 44.89710  | 2632.41300  | 41.87673  | 1922.32820  | Detected    | Detected | Detected    | Detected |
| 4161 | A_24_P225616  | RRM2         | Hs.226390 | ribonucleotide reductase M2                                                       | Homo sapiens ribonucleotide reductase M2 (RRM2), transcript variant 2, mRNA [NM_001034]                                  | 56.30852 | down | 87.60055 | down | 70.34309  | 4101.36700  | 30.43070  | 2350.62960  | Detected    | Detected | Detected    | Detected |
| 4162 | A_23_P259586  | TTK          | Hs.169840 | TTK protein kinase                                                                | Homo sapiens TTK protein kinase (TTK), transcript variant 1, mRNA [NM_003318]                                            | 56.15061 | down | 73.39811 | down | 25.58659  | 1487.64700  | 12.98803  | 840.60840   | Detected    | Detected | Compromised | Detected |
| 4163 | A_24_P297539  | UBE2C        | Hs.93002  | ubiquitin-conjugating enzyme E2C                                                  | Homo sapiens ubiquitin-conjugating enzyme E2C (UBE2C), transcript variant 6, mRNA [NM_181803]                            | 55.08201 | down | 59.43414 | down | 533.38605 | 30421.77100 | 342.11734 | 17929.84600 | Detected    | Detected | Detected    | Detected |
| 4164 | A_23_P212844  | TACC3        | Hs.104019 | transforming, acidic coiled-coil containing protein 3                             | Homo sapiens transforming, acidic coiled-coil containing protein 3 (TACC3), mRNA [NM_006342]                             | 53.95437 | down | 50.58793 | down | 57.68809  | 3222.89280  | 66.68399  | 2974.63700  | Detected    | Detected | Detected    | Detected |
| 4165 | A_24_P346855  | MK167        | Hs.80976  | antigen identified by monoclonal antibody Ki-67                                   | Homo sapiens antigen identified by monoclonal antibody Ki-67 (MK167), transcript variant 1, mRNA [NM_002417]             | 53.93493 | down | 90.15250 | down | 12.88017  | 719.32430   | 4.83019   | 383.97903   | Compromised | Detected | Compromised | Detected |
| 4166 | A_23_P210176  | ITGA6        | Hs.133397 | integrin, alpha 6                                                                 | Homo sapiens integrin, alpha 6 (ITGA6), transcript variant 2, mRNA [NM_000210]                                           | 53.34168 | down | 45.93769 | down | 21.47094  | 1185.90750  | 17.42930  | 706.01610   | Detected    | Detected | Detected    | Detected |
| 4167 | A_33_P3258627 |              |           |                                                                                   | Putative uncharacterized protein ENSP00000387024 [Source:UniProtKB/TrEMBL;Acc:B8ZZ63] [ENST00000409162]                  | 52.59529 | down | 8.27522  | down | 2.31702   | 126.18560   | 6.65699   | 48.57613    | Compromised | Detected | Compromised | Detected |
| 4168 | A_23_P10206   | HAS2         | Hs.159226 | hyaluronan synthase 2                                                             | Homo sapiens hyaluronan synthase 2 (HAS2), mRNA [NM_005328]                                                              | 51.20701 | down | 60.52638 | down | 50.60540  | 2683.23930  | 28.46118  | 1519.01870  | Detected    | Detected | Detected    | Detected |
| 4169 | A_33_P3216008 | SKA3         | Hs.88523  | spindle and kinetochore associated complex subunit 3                              | Homo sapiens spindle and kinetochore associated complex subunit 3 (SKA3), transcript variant 1, mRNA [NM_145061]         | 50.93999 | down | 48.42239 | down | 12.93789  | 682.42560   | 8.85430   | 378.06476   | Detected    | Detected | Compromised | Detected |
| 4170 | A_23_P423237  | SGCG         | Hs.37167  | sarcoglycan, gamma (35kDa dystrophin-associated glycoprotein)                     | Homo sapiens sarcoglycan, gamma (35kDa dystrophin-associated glycoprotein) (SGCG), mRNA [NM_002931]                      | 50.23103 | down | 13.21567 | down | 2.61723   | 136.12785   | 8.27940   | 96.48359    | Compromised | Detected | Compromised | Detected |
| 4171 | A_23_P24129   | DKK1         | Hs.40499  | dickkopf homolog 1 (Xenopus laevis)                                               | Homo sapiens dickkopf homolog 1 (Xenopus laevis) (DKK1), mRNA [NM_012242]                                                | 49.39177 | down | 47.39847 | down | 971.48020 | 49684.58200 | 814.47595 | 34041.45300 | Detected    | Detected | Detected    | Detected |
| 4172 | A_23_P163567  | SMPD3        | Hs.368421 | sphingomyelin phosphodiesterase 3, neutral membrane (neutral sphingomyelinase II) | Homo sapiens sphingomyelin phosphodiesterase 3, neutral membrane (neutral sphingomyelinase II) (SMPD3), mRNA [NM_018667] | 49.28304 | down | 25.49599 | down | 18.40829  | 939.38586   | 2.77939   | 62.48648    | Detected    | Detected | Compromised | Detected |
| 4173 | A_24_P416370  | HOXB4        | Hs.664706 | homeobox B4                                                                       | Homo sapiens homeobox B4 (HOXB4), mRNA [NM_024015]                                                                       | 48.99025 | down | 75.59501 | down | 21.78193  | 1104.94100  | 13.86268  | 924.07230   | Detected    | Detected | Detected    | Detected |
| 4174 | A_24_P225970  | SGOL1        | Hs.105153 | shugoshin-like 1 (S. pombe)                                                       | Homo sapiens shugoshin-like 1 (S. pombe) (SGOL1), transcript variant A1, mRNA [NM_00102409]                              | 48.72279 | down | 32.40385 | down | 10.13061  | 511.09410   | 10.08757  | 288.23630   | Compromised | Detected | Compromised | Detected |
| 4175 | A_24_P347378  | ALOX5AP      | Hs.507658 | arachidonate 5-lipoxygenase-activating protein                                    | Homo sapiens arachidonate 5-lipoxygenase-activating protein (ALOX5AP), mRNA [NM_001629]                                  | 48.64382 | down | 33.85954 | down | 2.26967   | 114.32042   | 2.35611   | 70.34632    | Compromised | Detected | Compromised | Detected |
| 4176 | A_33_P3387831 | CENPM        | Hs.208912 | centromere protein M                                                              | Homo sapiens centromere protein M (CENPM), transcript variant 1, mRNA [NM_024053]                                        | 47.62641 | down | 51.28153 | down | 238.83578 | 11778.23800 | 207.23128 | 9370.91100  | Detected    | Detected | Detected    | Detected |

|      |               |              |           |                                                                                           |                                                                                                                                    |          |      |          |      |           |             |           |             |             |          |             |          |
|------|---------------|--------------|-----------|-------------------------------------------------------------------------------------------|------------------------------------------------------------------------------------------------------------------------------------|----------|------|----------|------|-----------|-------------|-----------|-------------|-------------|----------|-------------|----------|
| 4177 | A_23_P356684  | ANLN         | Hs.62180  | anillin, actin binding protein                                                            | Homo sapiens anillin, actin binding protein (ANLN), mRNA [NM_018685]                                                               | 46.97221 | down | 53.60512 | down | 89.14799  | 4335.96440  | 61.57668  | 2910.63700  | Detected    | Detected | Detected    | Detected |
| 4178 | A_33_P3330149 | PAX6         | Hs.270303 | paired box 6                                                                              | Homo sapiens paired box 6 (PAX6), transcript variant 1, mRNA [NM_000280]                                                           | 46.52534 | down | 30.35840 | down | 2.62064   | 126.24968   | 3.08544   | 82.59633    | Compromised | Detected | Compromised | Detected |
| 4179 | A_24_P30557   | TBX5         | Hs.381715 | T-box 5                                                                                   | Homo sapiens T-box 5 (TBX5), transcript variant 1, mRNA [NM_000192]                                                                | 45.04174 | down | 37.62053 | down | 4.14714   | 193.41812   | 3.04195   | 100.91200   | Compromised | Detected | Compromised | Detected |
| 4180 | A_23_P146274  | STMN2        | Hs.521651 | stathmin-like 2                                                                           | Homo sapiens stathmin-like 2 (STMN2), mRNA [NM_007029]                                                                             | 43.26243 | down | 38.34229 | down | 251.80971 | 11280.19100 | 179.59544 | 6072.10000  | Detected    | Detected | Detected    | Detected |
| 4181 | A_33_P3303956 | LOC100133311 | Hs.658061 | similar to hCG1644697                                                                     | PREDICTED: Homo sapiens similar to hCG1644697 (LOC100133311), mRNA [XM_002344295]                                                  | 43.11292 | down | 26.67950 | down | 2.59771   | 115.96621   | 3.62127   | 85.19312    | Compromised | Detected | Compromised | Detected |
| 4182 | A_23_P130182  | AURKB        | Hs.442658 | aurora kinase B                                                                           | Homo sapiens aurora kinase B (AURKB), mRNA [NM_004217]                                                                             | 42.91836 | down | 55.67188 | down | 24.55805  | 1091.36500  | 20.76012  | 1019.13385  | Detected    | Detected | Detected    | Detected |
| 4183 | A_23_P56347   | PSG3         | Hs.654413 | pregnancy specific beta-1-glycoprotein 3                                                  | Homo sapiens pregnancy specific beta-1-glycoprotein 3 (PSG3), mRNA [NM_021016]                                                     | 42.86491 | down | 43.97244 | down | 93.47945  | 4149.07400  | 45.92394  | 1780.67700  | Detected    | Detected | Detected    | Detected |
| 4184 | A_23_P122197  | CCNB1        | Hs.23960  | cyclin B1                                                                                 | Homo sapiens cyclin B1 (CCNB1), mRNA [NM_031966]                                                                                   | 42.74203 | down | 44.84546 | down | 517.57600 | 22906.70500 | 392.00906 | 15501.72600 | Detected    | Detected | Detected    | Detected |
| 4185 | A_23_P100127  | CASC5        | Hs.181855 | cancer susceptibility candidate 5                                                         | Homo sapiens cancer susceptibility candidate 5 (CASC5), transcript variant 1, mRNA [NM_170589]                                     | 42.70049 | down | 49.23346 | down | 13.65018  | 603.53723   | 7.98926   | 346.84253   | Detected    | Detected | Compromised | Detected |
| 4186 | A_24_P280983  | HOXA11AS     | Hs.587427 | HOXA11 antisense RNA (non-protein coding)                                                 | Homo sapiens HOXA11 antisense RNA (non-protein coding) (HOXA11AS), antisense RNA [NR_002795]                                       | 41.97556 | down | 58.23160 | down | 34.17975  | 1485.58810  | 27.85350  | 1430.22380  | Detected    | Detected | Detected    | Detected |
| 4187 | A_23_P74349   | NUF2         | Hs.651950 | NUF2, NDC80 kinetochore complex component, homolog (S. cerevisiae)                        | Homo sapiens NUF2, NDC80 kinetochore complex component, homolog (S. cerevisiae) (NUF2), transcript variant 1, mRNA [NM_145697]     | 41.75897 | down | 42.07697 | down | 109.16320 | 4720.18600  | 109.68658 | 4069.71000  | Detected    | Detected | Detected    | Detected |
| 4188 | A_23_P373521  | HAND2        | Hs.388245 | heart and neural crest derivatives expressed 2                                            | Homo sapiens heart and neural crest derivatives expressed 2 (HAND2), mRNA [NM_021973]                                              | 41.60090 | down | 32.86138 | down | 13.50888  | 581.90924   | 19.07774  | 552.81280   | Detected    | Detected | Detected    | Detected |
| 4189 | A_33_P3311498 | LOC283392    | Hs.363603 | hypothetical LOC283392                                                                    | Homo sapiens hypothetical LOC283392 (LOC283392), transcript variant 1, non-coding RNA [NR_026837]                                  | 41.49494 | down | 40.66404 | down | 5.94969   | 255.63634   | 4.39060   | 157.43460   | Compromised | Detected | Compromised | Detected |
| 4190 | A_23_P151150  | FOXM1        | Hs.239    | forkhead box M1                                                                           | Homo sapiens forkhead box M1 (FOXM1), transcript variant 1, mRNA [NM_202002]                                                       | 41.37134 | down | 44.57644 | down | 121.89368 | 5221.72360  | 104.64352 | 4113.23200  | Detected    | Detected | Detected    | Detected |
| 4191 | A_23_P148475  | KIF4A        | Hs.648326 | kinesin family member 4A                                                                  | Homo sapiens kinesin family member 4A (KIF4A), mRNA [NM_012310]                                                                    | 41.30457 | down | 52.98214 | down | 83.02992  | 3551.12330  | 51.60595  | 2410.07670  | Detected    | Detected | Detected    | Detected |
| 4192 | A_23_P68610   | TPX2         | Hs.244580 | TPX2, microtubule-associated, homolog (Xenopus laevis)                                    | Homo sapiens TPX2, microtubule-associated, homolog (Xenopus laevis) (TPX2), mRNA [NM_012112]                                       | 41.25013 | down | 45.09609 | down | 243.59319 | 10404.55600 | 223.46461 | 8886.14000  | Detected    | Detected | Detected    | Detected |
| 4193 | A_24_P140475  | SORBS2       | Hs.655143 | sorbin and SH3 domain containing 2                                                        | Homo sapiens sorbin and SH3 domain containing 2 (SORBS2), transcript variant 2, mRNA [NM_021069]                                   | 41.04034 | down | 61.27197 | down | 6.06472   | 257.72375   | 2.78729   | 150.59439   | Compromised | Detected | Compromised | Detected |
| 4194 | A_23_P124417  | BUB1         | Hs.469649 | budding uninhibited by benzimidazoles 1 homolog (yeast)                                   | Homo sapiens budding uninhibited by benzimidazoles 1 homolog (yeast) (BUB1), mRNA [NM_004336]                                      | 40.92328 | down | 48.56127 | down | 63.01636  | 2670.28000  | 43.82879  | 1876.78700  | Detected    | Detected | Detected    | Detected |
| 4195 | A_23_P70007   | HMMR         | Hs.720052 | hyaluronan-mediated motility receptor (RHAMM)                                             | Homo sapiens hyaluronan-mediated motility receptor (RHAMM) (HMMR), transcript variant 2, mRNA [NM_012484]                          | 40.85090 | down | 49.38233 | down | 116.10930 | 4911.35940  | 73.05530  | 3179.89580  | Detected    | Detected | Detected    | Detected |
| 4196 | A_32_P150891  | DIAPH3       | Hs.283127 | diaphanous homolog 3 (Drosophila)                                                         | Homo sapiens diaphanous homolog 3 (Drosophila) (DIAPH3), transcript variant 1, mRNA [NM_001042517]                                 | 40.27765 | down | 44.14895 | down | 13.45490  | 561.14830   | 11.06306  | 430.68640   | Detected    | Detected | Compromised | Detected |
| 4197 | A_33_P3708413 | MFAP5        | Hs.512842 | microfibrillar associated protein 5                                                       | Homo sapiens microfibrillar associated protein 5 (MFAP5), mRNA [NM_003480]                                                         | 39.62058 | down | 53.98369 | down | 356.31840 | 14618.14000 | 262.57050 | 12498.96400 | Detected    | Detected | Detected    | Detected |
| 4198 | A_23_P96325   | ERCC6L       | Hs.47558  | excision repair cross-complementing rodent repair deficiency complementation group 6-like | Homo sapiens excision repair cross-complementing rodent repair deficiency, complementation group 6-like (ERCC6L), mRNA [NM_017669] | 39.58863 | down | 64.94959 | down | 20.08920  | 823.50500   | 12.51515  | 716.76685   | Detected    | Detected | Detected    | Detected |
| 4199 | A_23_P167159  | SCRG1        | Hs.7122   | stimulator of chondrogenesis 1                                                            | Homo sapiens stimulator of chondrogenesis 1 (SCRG1), mRNA [NM_007281]                                                              | 39.33724 | down | 24.93944 | down | 2.66140   | 108.40463   | 3.20510   | 70.48447    | Compromised | Detected | Compromised | Detected |
| 4200 | A_23_P121795  | SORBS2       | Hs.655143 | sorbin and SH3 domain containing 2                                                        | Homo sapiens sorbin and SH3 domain containing 2 (SORBS2), transcript variant 2, mRNA [NM_021069]                                   | 38.97343 | down | 33.97353 | down | 13.70106  | 552.91187   | 14.33083  | 429.31635   | Detected    | Detected | Detected    | Detected |
| 4201 | A_23_P215454  | ELN          | Hs.647061 | elastin                                                                                   | Homo sapiens elastin (ELN), transcript variant 1, mRNA [NM_000501]                                                                 | 37.86731 | down | 52.46331 | down | 51.50940  | 2019.68640  | 45.34365  | 2097.67200  | Detected    | Detected | Detected    | Detected |
| 4202 | A_23_P117852  | KIAA0101     | Hs.81892  | KIAA0101                                                                                  | Homo sapiens KIAA0101 (KIAA0101), transcript variant 1, mRNA [NM_014736]                                                           | 36.86894 | down | 35.94107 | down | 540.27780 | 20635.85700 | 324.31445 | 10278.34300 | Detected    | Detected | Detected    | Detected |
| 4203 | A_23_P72668   | SDPR         | Hs.26530  | serum deprivation response                                                                | Homo sapiens serum deprivation response (SDPR), mRNA [NM_004657]                                                                   | 36.06926 | down | 30.90423 | down | 4.32851   | 161.86243   | 3.54686   | 96.65572    | Compromised | Detected | Compromised | Detected |
| 4204 | A_23_P323751  | FAM83D       | Hs.472716 | family with sequence similarity 83, member D                                              | Homo sapiens family with sequence similarity 83, member D (FAM83D), mRNA [NM_030919]                                               | 35.86057 | down | 38.07982 | down | 68.57602  | 2546.37650  | 38.00895  | 1276.28080  | Detected    | Detected | Detected    | Detected |
| 4205 | A_33_P3326210 | ESCO2        | Hs.99480  | establishment of cohesion 1 homolog 2 (S. cerevisiae)                                     | Homo sapiens establishment of cohesion 1 homolog 2 (S. cerevisiae) (ESCO2), mRNA [NM_001017420]                                    | 35.85314 | down | 25.91011 | down | 2.66392   | 98.89648    | 3.07945   | 70.35697    | Compromised | Detected | Compromised | Detected |
| 4206 | A_23_P157136  | SCIN         | Hs.655515 | scinderin                                                                                 | Homo sapiens scinderin (SCIN), transcript variant 2, mRNA [NM_033128]                                                              | 35.78193 | down | 7.72451  | down | 2.38629   | 88.41367    | 5.01626   | 34.16774    | Compromised | Detected | Compromised | Detected |
| 4207 | A_23_P375     | CDC48        | Hs.524571 | cell division cycle associated 8                                                          | Homo sapiens cell division cycle associated 8 (CDC48), mRNA [NM_018101]                                                            | 35.73556 | down | 45.04246 | down | 524.05695 | 19391.53300 | 375.53683 | 14915.58000 | Detected    | Detected | Detected    | Detected |

|      |               |              |           |                                                                     |                                                                                                                                |          |      |           |      |            |             |           |             |             |          |             |          |
|------|---------------|--------------|-----------|---------------------------------------------------------------------|--------------------------------------------------------------------------------------------------------------------------------|----------|------|-----------|------|------------|-------------|-----------|-------------|-------------|----------|-------------|----------|
| 4208 | A_23_P50108   | NDC80        | Hs.414407 | NDC80 homolog, kinetochore complex component (S. cerevisiae)        | Homo sapiens NDC80 homolog, kinetochore complex component (S. cerevisiae) (NDC80), mRNA [NM_006101]                            | 35.48090 | down | 39.47569  | down | 492.26477  | 18085.33000 | 351.30728 | 12228.76100 | Detected    | Detected | Detected    | Detected |
| 4209 | A_32_P62997   | PBK          | Hs.104741 | PDZ binding kinase                                                  | Homo sapiens PDZ binding kinase (PBK), mRNA [NM_018492]                                                                        | 35.46259 | down | 35.71678  | down | 272.00460  | 9988.02700  | 235.21033 | 7407.88530  | Detected    | Detected | Detected    | Detected |
| 4210 | A_32_P140489  | GDF6         | Hs.492277 | growth differentiation factor 6                                     | Homo sapiens growth differentiation factor 6 (GDF6), mRNA [NM_001001557]                                                       | 34.81978 | down | 9.34949   | down | 3.73760    | 134.75726   | 6.48856   | 53.49357    | Compromised | Detected | Compromised | Detected |
| 4211 | A_33_P3272957 | LOC100133311 | Hs.658061 | similar to HCG1644697                                               | PREDICTED: Homo sapiens similar to HCG1644697 (LOC100133311), mRNA [XM_002344295]                                              | 34.80172 | down | 23.70523  | down | 2.87419    | 103.57362   | 3.31359   | 69.26411    | Compromised | Detected | Compromised | Detected |
| 4212 | A_23_P163481  | BUB1B        | Hs.513645 | budding uninhibited by benzimidazoles 1 homolog beta (yeast)        | Homo sapiens budding uninhibited by benzimidazoles 1 homolog beta (yeast) (BUB1B), mRNA [NM_001211]                            | 34.57169 | down | 39.85715  | down | 88.89745   | 3182.31400  | 71.71636  | 2520.51930  | Detected    | Detected | Detected    | Detected |
| 4213 | A_33_P3311755 | KIF23        | Hs.270845 | kinesin family member 23                                            | Homo sapiens kinesin family member 23 (KIF23), transcript variant 1, mRNA [NM_138555]                                          | 34.17050 | down | 25.71962  | down | 84.03610   | 2973.37900  | 79.24654  | 1797.25780  | Detected    | Detected | Detected    | Detected |
| 4214 | A_23_P200310  | DEPDC1       | Hs.445098 | DEP domain containing 1                                             | Homo sapiens DEP domain containing 1 (DEPDC1), transcript variant 2, mRNA [NM_017779]                                          | 34.04056 | down | 51.95702  | down | 70.18784   | 2473.95400  | 28.20383  | 1292.16460  | Detected    | Detected | Detected    | Detected |
| 4215 | A_23_P58321   | CCNA2        | Hs.58974  | cyclin A2                                                           | Homo sapiens cyclin A2 (CCNA2), mRNA [NM_001237]                                                                               | 33.80436 | down | 39.61835  | down | 59.81775   | 2093.80300  | 43.77638  | 1529.33180  | Detected    | Detected | Detected    | Detected |
| 4216 | A_23_P501538  | HOXA3        | Hs.659337 | homeobox A3                                                         | Homo sapiens homeobox A3 (HOXA3), transcript variant 2, mRNA [NM_153631]                                                       | 33.35369 | down | 18.09414  | down | 2.40679    | 83.12165    | 2.54286   | 40.57189    | Compromised | Detected | Compromised | Detected |
| 4217 | A_33_P3423585 | UNC13C       | Hs.657273 | unc-13 homolog C (C. elegans)                                       | Homo sapiens unc-13 homolog C (C. elegans) (UNC13C), mRNA [NM_001080534]                                                       | 33.21877 | down | 19.39248  | down | 3.27679    | 94.13646    | 3.03744   | 51.94047    | Compromised | Detected | Compromised | Detected |
| 4218 | A_24_P399888  | CENPM        | Hs.208912 | centromere protein M                                                | Homo sapiens centromere protein M (CENPM), transcript variant 2, mRNA [NM_001002876]                                           | 32.49764 | down | 34.80446  | down | 30.25951   | 1018.23220  | 26.53851  | 814.47327   | Detected    | Detected | Detected    | Detected |
| 4219 | A_24_P66027   | APOBEC3B     | Hs.226307 | apolipoprotein B mRNA editing enzyme, catalytic polypeptide-like 3B | Homo sapiens apolipoprotein B mRNA editing enzyme, catalytic polypeptide-like 3B (APOBEC3B), mRNA [NM_004900]                  | 31.39611 | down | 72.79544  | down | 82.84677   | 2693.29900  | 39.46157  | 2533.05150  | Detected    | Detected | Detected    | Detected |
| 4220 | A_23_P107283  | HOXB2        | Hs.514289 | homeobox B2                                                         | Homo sapiens homeobox B2 (HOXB2), mRNA [NM_002145]                                                                             | 31.19959 | down | 31.77469  | down | 256.95248  | 8301.08400  | 213.80014 | 5990.38600  | Detected    | Detected | Detected    | Detected |
| 4221 | A_33_P3368358 | NEDD9        | Hs.37982  | neural precursor cell expressed, developmentally down-regulated 9   | Homo sapiens neural precursor cell expressed, developmentally down-regulated 9 (NEDD9), transcript variant 2, mRNA [NM_182966] | 31.14883 | down | 19.13658  | down | 5.83776    | 188.28748   | 9.52556   | 160.73872   | Compromised | Detected | Compromised | Detected |
| 4222 | A_33_P3255824 |              |           |                                                                     |                                                                                                                                | 31.06368 | down | 9.36224   | down | 4.28859    | 137.94330   | 7.36967   | 60.84053    | Compromised | Detected | Compromised | Detected |
| 4223 | A_23_P96158   | KRT17        | Hs.2785   | keratin 17                                                          | Homo sapiens keratin 17 (KRT17), mRNA [NM_000422]                                                                              | 30.95973 | down | 18.17780  | down | 2.61022    | 83.67714    | 7.17710   | 115.04189   | Compromised | Detected | Compromised | Detected |
| 4224 | A_33_P3242649 | KIF18A       | Hs.301052 | kinesin family member 18A                                           | Homo sapiens kinesin family member 18A (KIF18A), mRNA [NM_031217]                                                              | 30.24299 | down | 50.83564  | down | 21.10955   | 661.05370   | 8.59912   | 385.46753   | Detected    | Detected | Compromised | Detected |
| 4225 | A_33_P3270514 | NBLA00301    | Hs.61435  | Nbla00301                                                           | Homo sapiens Nbla00301 (NBLA00301), non-coding RNA [NR_003679]                                                                 | 30.17527 | down | 8.42936   | down | 4.17646    | 130.49452   | 10.87418  | 80.82700    | Compromised | Detected | Compromised | Detected |
| 4226 | A_33_P3222600 | LOC100132588 |           | hypothetical protein LOC100132588                                   | PREDICTED: Homo sapiens hypothetical LOC100132588 (LOC100132588), mRNA [XM_001724555]                                          | 29.99870 | down | 23.08425  | down | 2.46339    | 76.51893    | 2.80229   | 57.04184    | Compromised | Detected | Compromised | Detected |
| 4227 | A_24_P276576  | FCRLA        | Hs.266331 | Fc receptor-like A                                                  | Homo sapiens Fc receptor-like A (FCRLA), mRNA [NM_032738]                                                                      | 29.93015 | down | 23.49507  | down | 2.38212    | 73.20557    | 2.47585   | 51.29394    | Compromised | Detected | Compromised | Detected |
| 4228 | A_24_P322354  | SKA1         | Hs.134726 | spindle and kinetochore associated complex subunit 1                | Homo sapiens spindle and kinetochore associated complex subunit 1 (SKA1), transcript variant 1, mRNA [NM_001039555]            | 29.75853 | down | 22.59668  | down | 33.14546   | 1021.33580  | 43.43451  | 865.45593   | Detected    | Detected | Detected    | Detected |
| 4229 | A_23_P401     | CENPF        | Hs.497741 | centromere protein F, 350/400ka (mitosin)                           | Homo sapiens centromere protein F, 350/400ka (mitosin) (CENPF), mRNA [NM_016343]                                               | 29.53957 | down | 29.72701  | down | 1128.54430 | 34518.81200 | 808.48630 | 21192.85400 | Detected    | Detected | Detected    | Detected |
| 4230 | A_24_P296254  | ARHGAP11A    | Hs.591130 | Rho GTPase activating protein 11A                                   | Homo sapiens Rho GTPase activating protein 11A (ARHGAP11A), transcript variant 1, mRNA [NM_014783]                             | 28.92835 | down | 14.87799  | down | 10.29851   | 308.48290   | 14.65840  | 192.30750   | Compromised | Detected | Detected    | Detected |
| 4231 | A_24_P96780   | CENPF        | Hs.497741 | centromere protein F, 350/400ka (mitosin)                           | Homo sapiens centromere protein F, 350/400ka (mitosin) (CENPF), mRNA [NM_016343]                                               | 28.87474 | down | 24.69378  | down | 28.05992   | 838.95300   | 16.40652  | 357.24786   | Detected    | Detected | Detected    | Detected |
| 4232 | A_24_P419132  | CENPI        | Hs.348820 | centromere protein I                                                | Homo sapiens centromere protein I (CENPI), mRNA [NM_006733]                                                                    | 28.78056 | down | 22.96875  | down | 2.85082    | 84.95754    | 3.28953   | 66.62502    | Compromised | Detected | Compromised | Detected |
| 4233 | A_23_P149200  | CDC20        | Hs.524947 | cell division cycle 20 homolog (S. cerevisiae)                      | Homo sapiens cell division cycle 20 homolog (S. cerevisiae) (CDC20), mRNA [NM_001255]                                          | 28.26161 | down | 36.94858  | down | 206.87822  | 6054.03200  | 168.00581 | 5473.78300  | Detected    | Detected | Detected    | Detected |
| 4234 | A_23_P169097  | WISP1        | Hs.492974 | WNT1 inducible signaling pathway protein 1                          | Homo sapiens WNT1 inducible signaling pathway protein 1 (WISP1), transcript variant 2, mRNA [NM_080638]                        | 28.11829 | down | 23.15160  | down | 3.95122    | 115.04121   | 5.70281   | 116.42203   | Compromised | Detected | Compromised | Detected |
| 4235 | A_24_P413884  | CENPA        | Hs.1594   | centromere protein A                                                | Homo sapiens centromere protein A (CENPA), transcript variant 1, mRNA [NM_001809]                                              | 28.00815 | down | 36.46183  | down | 64.97530   | 1884.36880  | 33.96244  | 1091.95030  | Detected    | Detected | Detected    | Detected |
| 4236 | A_33_P3376116 | SPC24        | Hs.381225 | SPC24, NDC80 kinetochore complex component, homolog (S. cerevisiae) | Homo sapiens SPC24, NDC80 kinetochore complex component, homolog (S. cerevisiae) (SPC24), mRNA [NM_182513]                     | 27.98772 | down | 50.79770  | down | 6.32711    | 183.36061   | 3.35695   | 150.36780   | Compromised | Detected | Compromised | Detected |
| 4237 | A_33_P3374205 | MKI67        | Hs.80976  | antigen identified by monoclonal antibody Ki-67                     | Homo sapiens antigen identified by monoclonal antibody Ki-67 (MKI67), transcript variant 1, mRNA [NM_002417]                   | 27.95661 | down | 132.04602 | down | 13.86352   | 401.32025   | 2.54857   | 296.74707   | Detected    | Detected | Compromised | Detected |
| 4238 | A_33_P3295333 | CLEC1A       | Hs.29549  | C-type lectin domain family 1, member A                             | Homo sapiens C-type lectin domain family 1, member A (CLEC1A), mRNA [NM_016511]                                                | 27.91618 | down | 17.66912  | down | 2.85839    | 82.62470    | 3.45768   | 53.87229    | Compromised | Detected | Compromised | Detected |

|      |               |              |           |                                                              |                                                                                                                                                                              |          |      |          |      |            |             |            |             |             |          |             |             |
|------|---------------|--------------|-----------|--------------------------------------------------------------|------------------------------------------------------------------------------------------------------------------------------------------------------------------------------|----------|------|----------|------|------------|-------------|------------|-------------|-------------|----------|-------------|-------------|
| 4239 | A_23_P48835   | KIF23        | Hs.270845 | kinesin family member 23                                     | Homo sapiens kinesin family member 23 (KIF23), transcript variant 1, mRNA [NM_138555]                                                                                        | 27.51100 | down | 31.99163 | down | 474.74826  | 13523.92800 | 324.82614  | 9163.31800  | Detected    | Detected | Detected    | Detected    |
| 4240 | A_33_P3241334 |              | Hs.709192 |                                                              | Pregnancy-specific beta-1-glycoprotein 10 Precursor (PSBG-10)(Pregnancy-specific beta-1-glycoprotein 12)(PSBG-12) [Source:UniProtKB/Swiss-Prot;Acc:Q15235] [ENST00000402456] | 27.50140 | down | 1.17945  | down | 7.45382    | 212.25935   | 3.04265    | 3.16443     | Compromised | Detected | Compromised | Compromised |
| 4241 | A_23_P89509   | SPAG5        | Hs.514033 | sperm associated antigen 5                                   | Homo sapiens sperm associated antigen 5 (SPAG5), mRNA [NM_006461]                                                                                                            | 27.46461 | down | 30.53343 | down | 536.76495  | 15264.78500 | 436.38416  | 11749.24800 | Detected    | Detected | Detected    | Detected    |
| 4242 | A_23_P393015  | MYL10        | Hs.247831 | myosin, light chain 10, regulatory                           | Homo sapiens myosin, light chain 10, regulatory (MYL10), mRNA [NM_138403]                                                                                                    | 27.13719 | down | 17.72338 | down | 2.67354    | 75.12500    | 4.47056    | 69.86723    | Compromised | Detected | Compromised | Detected    |
| 4243 | A_33_P3230254 | NCAPG        | Hs.567567 | non-SMC condensin I complex, subunit G                       | Homo sapiens non-SMC condensin I complex, subunit G (NCAPG), mRNA [NM_022346]                                                                                                | 26.86137 | down | 13.70359 | down | 8.17935    | 227.49911   | 12.68985   | 153.34033   | Compromised | Detected | Detected    | Detected    |
| 4244 | A_33_P3254844 | CEACAM7      | Hs.74466  | carcinoembryonic antigen-related cell adhesion molecule 7    | Homo sapiens carcinoembryonic antigen-related cell adhesion molecule 7 (CEACAM7), mRNA [NM_008890]                                                                           | 26.49349 | down | 6.39351  | down | 2.69588    | 73.95578    | 2.95227    | 16.64412    | Compromised | Detected | Compromised | Detected    |
| 4245 | A_23_P133956  | KIFC1        | Hs.436912 | kinesin family member C1                                     | Homo sapiens kinesin family member C1 (KIFC1), mRNA [NM_002263]                                                                                                              | 25.98211 | down | 30.89576 | down | 66.36352   | 1839.21250  | 67.40395   | 1836.32600  | Detected    | Detected | Detected    | Detected    |
| 4246 | A_23_P389281  | HOXA13       | Hs.592172 | homeobox A13                                                 | Homo sapiens homeobox A13 (HOXA13), mRNA [NM_000522]                                                                                                                         | 25.95339 | down | 14.20313 | down | 2.39783    | 64.43839    | 2.64672    | 33.14802    | Compromised | Detected | Compromised | Detected    |
| 4247 | A_23_P150935  | TROAP        | Hs.524399 | trophinin associated protein (tastin)                        | Homo sapiens trophinin associated protein (tastin) (TROAP), transcript variant 1, mRNA [NM_005480]                                                                           | 25.85623 | down | 41.51222 | down | 198.92014  | 5325.70400  | 108.48868  | 3971.23700  | Detected    | Detected | Detected    | Detected    |
| 4248 | A_23_P50096   | TYMS         | Hs.592338 | thymidylate synthetase                                       | Homo sapiens thymidylate synthetase (TYMS), mRNA [NM_001071]                                                                                                                 | 25.48037 | down | 24.16934 | down | 1101.61240 | 29064.81800 | 973.80450  | 20754.01200 | Detected    | Detected | Detected    | Detected    |
| 4249 | A_33_P3350488 | NUSAP1       | Hs.615092 | nucleolar and spindle associated protein 1                   | Homo sapiens nucleolar and spindle associated protein 1 (NUSAP1), transcript variant 1, mRNA [NM_016359]                                                                     | 25.47006 | down | 24.61929 | down | 456.77460  | 12046.61500 | 337.07593  | 7317.60250  | Detected    | Detected | Detected    | Detected    |
| 4250 | A_32_P105549  | ANXA8L2      | Hs.705389 | annexin A8-like 2                                            | Homo sapiens annexin A8-like 2 (ANXA8L2), mRNA [NM_001630]                                                                                                                   | 25.45810 | down | 21.92742 | down | 76.16319   | 2007.72500  | 90.35633   | 1747.07540  | Detected    | Detected | Detected    | Detected    |
| 4251 | A_33_P3383687 | LOC100132588 | Hs.689599 | hypothetical protein LOC100132588                            | PREDICTED: Homo sapiens hypothetical protein LOC100132588 (LOC100132588), mRNA [XM_001724555]                                                                                | 25.20237 | down | 2.27886  | down | 2.30255    | 60.08739    | 23.29500   | 46.81074    | Compromised | Detected | Detected    | Detected    |
| 4252 | A_33_P3232945 | F2RL1        | Hs.720399 | coagulation factor II (thrombin) receptor-like 1             | Homo sapiens coagulation factor II (thrombin) receptor-like 1 (F2RL1), mRNA [NM_005242]                                                                                      | 25.13159 | down | 20.90183 | down | 91.22343   | 2373.88400  | 64.10367   | 1181.49760  | Detected    | Detected | Detected    | Detected    |
| 4253 | A_33_P3286372 | C2orf48      | Hs.676025 | chromosome 2 open reading frame 48                           | Homo sapiens chromosome 2 open reading frame 48 (C2orf48), mRNA [NM_182626]                                                                                                  | 25.12050 | down | 18.76624 | down | 2.58037    | 66.59853    | 3.76110    | 62.23827    | Compromised | Detected | Compromised | Detected    |
| 4254 | A_33_P3237874 | TROAP        | Hs.524399 | trophinin associated protein (tastin)                        | Homo sapiens trophinin associated protein (tastin) (TROAP), transcript variant 2, mRNA [NM_001100620]                                                                        | 24.72655 | down | 45.41724 | down | 92.35039   | 2364.47780  | 64.88549   | 2598.56620  | Detected    | Detected | Detected    | Detected    |
| 4255 | A_32_P51237   | KANK4        | Hs.283398 | KN motif and ankyrin repeat domains 4                        | Homo sapiens KN motif and ankyrin repeat domains 4 (KANK4), mRNA [NM_181712]                                                                                                 | 24.48150 | down | 16.68460 | down | 2.36630    | 59.98484    | 2.53535    | 37.30093    | Compromised | Detected | Compromised | Detected    |
| 4256 | A_33_P3238215 | COBL1        | Hs.470457 | COBL-like 1                                                  | Homo sapiens COBL-like 1 (COBL1), mRNA [NM_014900]                                                                                                                           | 24.28693 | down | 27.82551 | down | 130.00362  | 3269.34860  | 79.11240   | 1941.12340  | Detected    | Detected | Detected    | Detected    |
| 4257 | A_32_P147078  | SLC8A1       | Hs.468274 | solute carrier family 8 (sodium/calcium exchanger), member 1 | Homo sapiens solute carrier family 8 (sodium/calcium exchanger), member 1 (SLC8A1), transcript variant A, mRNA [NM_021097]                                                   | 24.25266 | down | 28.19601 | down | 86.19134   | 2164.49240  | 61.70829   | 1534.25200  | Detected    | Detected | Detected    | Detected    |
| 4258 | A_33_P3298387 | PLK1         | Hs.592049 | polo-like kinase 1 (Drosophila)                              | Homo sapiens polo-like kinase 1 (Drosophila) (PLK1), mRNA [NM_005030]                                                                                                        | 24.01372 | down | 25.77529 | down | 16.77517   | 417.11844   | 17.10410   | 388.74908   | Detected    | Detected | Detected    | Detected    |
| 4259 | A_33_P3360216 | HIST1HZAI    | Hs.534035 | histone cluster 1, HZai                                      | Homo sapiens histone cluster 1, HZai (HIST1HZAI), mRNA [NM_003509]                                                                                                           | 23.89855 | down | 15.85401 | down | 2.35046    | 58.16457    | 4.54693    | 63.56579    | Compromised | Detected | Compromised | Detected    |
| 4260 | A_23_P385861  | CDC42        | Hs.33366  | cell division cycle associated 2                             | Homo sapiens cell division cycle associated 2 (CDC42), mRNA [NM_152582]                                                                                                      | 23.84935 | down | 24.13222 | down | 521.70935  | 12883.63100 | 388.97968  | 8277.31900  | Detected    | Detected | Detected    | Detected    |
| 4261 | A_24_P206776  | CRYAB        | Hs.53454  | crystallin, alpha B                                          | Homo sapiens crystallin, alpha B (CRYAB), mRNA [NM_001885]                                                                                                                   | 23.70014 | down | 23.36260 | down | 2041.03980 | 50088.21500 | 2418.37840 | 49820.84000 | Detected    | Detected | Detected    | Detected    |
| 4262 | A_33_P3239347 | NKX3-1       | Hs.55599  | NK3 homeobox 1                                               | Homo sapiens NK3 homeobox 1 (NKX3-1), mRNA [NM_006167]                                                                                                                       | 23.59190 | down | 21.14121 | down | 36.95398   | 902.72864   | 33.94248   | 632.75990   | Detected    | Detected | Detected    | Detected    |
| 4263 | A_23_P388812  | CKAP2L       | Hs.434250 | cytoskeleton associated protein 2-like                       | Homo sapiens cytoskeleton associated protein 2-like (CKAP2L), mRNA [NM_152515]                                                                                               | 23.56590 | down | 26.92141 | down | 54.82716   | 1337.86650  | 66.33037   | 1574.61960  | Detected    | Detected | Detected    | Detected    |
| 4264 | A_23_P69030   | COL8A1       | Hs.665458 | collagen, type VIII, alpha 1                                 | Homo sapiens collagen, type VIII, alpha 1 (COL8A1), transcript variant 1, mRNA [NM_001850]                                                                                   | 23.53891 | down | 28.27520 | down | 392.14618  | 9558.00700  | 288.84400  | 7201.69240  | Detected    | Detected | Detected    | Detected    |
| 4265 | A_33_P3212994 | ZWINT        | Hs.591363 | ZW10 interactor                                              | Homo sapiens ZW10 interactor (ZWINT), transcript variant 2, mRNA [NM_032997]                                                                                                 | 23.49981 | down | 23.20289 | down | 174.03929  | 4234.91600  | 128.22861  | 2582.64870  | Detected    | Detected | Detected    | Detected    |
| 4266 | A_24_P314571  |              | Hs.621849 |                                                              | Kinetochore protein Spc24 (hSpc24) [Source:UniProtKB/Swiss-Prot;Acc:Q8NB72] [ENST00000293743]                                                                                | 23.47924 | down | 26.93779 | down | 88.55961   | 2153.04350  | 98.14356   | 2331.25270  | Detected    | Detected | Detected    | Detected    |
| 4267 | A_33_P3395428 | LOC100131594 | Hs.689599 | hypothetical protein LOC100131594                            | PREDICTED: Homo sapiens hypothetical protein LOC100131594 (LOC100131594), mRNA [XM_001713897]                                                                                | 23.47566 | down | 11.53013 | down | 2.57165    | 62.51181    | 4.25822    | 43.29396    | Compromised | Detected | Compromised | Detected    |
| 4268 | A_23_P379614  | OIP5         | Hs.661645 | Opa interacting protein 5                                    | Homo sapiens Opa interacting protein 5 (OIP5), mRNA [NM_007380]                                                                                                              | 23.44438 | down | 22.77427 | down | 280.73947  | 6815.14900  | 198.32660  | 3982.82300  | Detected    | Detected | Detected    | Detected    |
| 4269 | A_33_P3359047 | LYPD6        | Hs.21929  | LY6/PLAUR domain containing 6                                | Homo sapiens LY6/PLAUR domain containing 6 (LYPD6), mRNA [NM_194317]                                                                                                         | 23.37007 | down | 39.18985 | down | 6.04121    | 146.18977   | 3.15517    | 109.03382   | Compromised | Detected | Compromised | Detected    |

|      |               |           |           |                                                            |                                                                                                                                                                                     |          |      |          |      |            |             |            |             |             |          |             |             |
|------|---------------|-----------|-----------|------------------------------------------------------------|-------------------------------------------------------------------------------------------------------------------------------------------------------------------------------------|----------|------|----------|------|------------|-------------|------------|-------------|-------------|----------|-------------|-------------|
| 4270 | A_33_P3253596 | KIF4A     | Hs.648326 | kinesin family member 4A                                   | Homo sapiens kinesin family member 4A (KIF4A), mRNA [NM_012310]                                                                                                                     | 23.27730 | down | 39.24998 | down | 31.42260   | 757.36957   | 16.23617   | 561.93823   | Detected    | Detected | Detected    | Detected    |
| 4271 | A_23_P388987  | NGFR      | Hs.415768 | nerve growth factor receptor (TNFR superfamily, member 16) | Homo sapiens nerve growth factor receptor (TNFR superfamily, member 16) (NGFR), mRNA [NM_002507]                                                                                    | 23.03998 | down | 30.64351 | down | 13.95094   | 332.82703   | 9.57043    | 258.60416   | Detected    | Detected | Compromised | Detected    |
| 4272 | A_24_P227091  | KIF11     | Hs.8878   | kinesin family member 11                                   | Homo sapiens kinesin family member 11 (KIF11), mRNA [NM_004523]                                                                                                                     | 22.82629 | down | 21.38833 | down | 114.75316  | 2712.27150  | 102.49800  | 1933.11510  | Detected    | Detected | Detected    | Detected    |
| 4273 | A_24_P288890  | FAM101A   | Hs.432901 | family with sequence similarity 101, member A              | Homo sapiens family with sequence similarity 101, member A (FAM101A), mRNA [NM_181709]                                                                                              | 22.72591 | down | 48.43768 | down | 19.58541   | 460.87915   | 10.31214   | 440.45105   | Detected    | Detected | Compromised | Detected    |
| 4274 | A_23_P63789   | ZWINT     | Hs.591363 | ZW10 interactor                                            | Homo sapiens ZW10 interactor (ZWINT), transcript variant 2, mRNA [NM_032997]                                                                                                        | 22.61160 | down | 24.34384 | down | 358.83880  | 8401.63400  | 261.63540  | 5616.31100  | Detected    | Detected | Detected    | Detected    |
| 4275 | A_23_P154526  | GRB14     | Hs.411881 | growth factor receptor-bound protein 14                    | Homo sapiens growth factor receptor-bound protein 14 (GRB14), mRNA [NM_004490]                                                                                                      | 22.55805 | down | 23.66319 | down | 82.34106   | 1923.31840  | 55.05007   | 1148.67370  | Detected    | Detected | Detected    | Detected    |
| 4276 | A_33_P3339375 | ARHGAP11B | Hs.659621 | Rho GTPase activating protein 11B                          | Homo sapiens Rho GTPase activating protein 11B (ARHGAP11B), mRNA [NM_001039841]                                                                                                     | 22.23459 | down | 20.62765 | down | 19.36673   | 445.88050   | 16.37650   | 297.87656   | Detected    | Detected | Detected    | Detected    |
| 4277 | A_24_P218979  | CDC43     | Hs.524216 | cell division cycle associated 3                           | Homo sapiens cell division cycle associated 3 (CDC43), mRNA [NM_031293]                                                                                                             | 22.10996 | down | 27.92632 | down | 123.13178  | 2818.97440  | 116.81379  | 2876.55930  | Detected    | Detected | Detected    | Detected    |
| 4278 | A_33_P3372413 | LOC390557 |           | hypothetical LOC390557                                     | PREDICTED: Homo sapiens similar to CG2040392 (LOC390557), mRNA [XM_002347518]                                                                                                       | 22.09164 | down | 5.70985  | down | 2.82314    | 64.57932    | 3.47417    | 17.49210    | Compromised | Detected | Compromised | Detected    |
| 4279 | A_33_P3233906 | RAMP1     | Hs.471783 | receptor (G protein-coupled) activity modifying protein 1  | Homo sapiens receptor (G protein-coupled) activity modifying protein 1 (RAMP1), mRNA [NM_005855]                                                                                    | 21.87682 | down | 20.80549 | down | 31.47056   | 712.88885   | 50.70985   | 930.32710   | Detected    | Detected | Detected    | Detected    |
| 4280 | A_33_P3318661 | E2F7      | Hs.416375 | E2F transcription factor 7                                 | Homo sapiens E2F transcription factor 7 (E2F7), mRNA [NM_203394]                                                                                                                    | 21.46688 | down | 18.85418 | down | 2.46618    | 54.81842    | 2.76984    | 46.04974    | Compromised | Detected | Compromised | Detected    |
| 4281 | A_33_P3315385 | MPPED2    | Hs.289795 | metallophosphoesterase domain containing 2                 | Homo sapiens metallophosphoesterase domain containing 2 (MPPED2), transcript variant 1, mRNA [NM_001584]                                                                            | 21.33950 | down | 10.78532 | down | 2.25900    | 49.91534    | 2.35537    | 22.40050    | Compromised | Detected | Compromised | Detected    |
| 4282 | A_23_P213336  | FGF1      | Hs.483635 | fibroblast growth factor 1 (acidic)                        | Homo sapiens fibroblast growth factor 1 (acidic) (FGF1), transcript variant 1, mRNA [NM_000800]                                                                                     | 21.22867 | down | 42.34012 | down | 23.06308   | 506.95938   | 10.85725   | 405.35687   | Detected    | Detected | Compromised | Detected    |
| 4283 | A_23_P254733  | MLF1IP    | Hs.575032 | MLF1 interacting protein                                   | Homo sapiens MLF1 interacting protein (MLF1IP), mRNA [NM_024629]                                                                                                                    | 21.19541 | down | 19.14272 | down | 491.06420  | 10777.37800 | 376.09010  | 6348.35400  | Detected    | Detected | Detected    | Detected    |
| 4284 | A_23_P369485  | MGC45800  |           | hypothetical LOC90768                                      | Homo sapiens hypothetical LOC90768 (MGC45800), non-coding RNA [NR_0271107]                                                                                                          | 21.11673 | down | 10.74253 | down | 3.61191    | 78.97618    | 7.26528    | 68.82154    | Compromised | Detected | Compromised | Detected    |
| 4285 | A_23_P83403   | LIMCH1    | Hs.335163 | LIM and calponin homology domains 1                        | Homo sapiens LIM and calponin homology domains 1 (LIMCH1), transcript variant 1, mRNA [NM_014986]                                                                                   | 21.08139 | down | 27.51155 | down | 3.52084    | 76.85609    | 2.77353    | 67.28425    | Compromised | Detected | Compromised | Detected    |
| 4286 | A_23_P46039   | FCRLA     | Hs.266331 | Fc receptor-like A                                         | Homo sapiens Fc receptor-like A (FCRLA), mRNA [NM_032738]                                                                                                                           | 20.82261 | down | 36.28435 | down | 12.70706   | 273.97644   | 10.59259   | 338.91202   | Compromised | Detected | Compromised | Detected    |
| 4287 | A_23_P155969  | PLK4      | Hs.172052 | polo-like kinase 4 (Drosophila)                            | Homo sapiens polo-like kinase 4 (Drosophila) (PLK4), mRNA [NM_014264]                                                                                                               | 20.70854 | down | 40.33532 | down | 26.50033   | 568.24250   | 9.90814    | 352.40582   | Detected    | Detected | Compromised | Detected    |
| 4288 | A_33_P3348872 |           |           |                                                            |                                                                                                                                                                                     | 20.64854 | down | 1.16646  | down | 2.78004    | 59.43919    | 3.10964    | 3.19848     | Compromised | Detected | Compromised | Compromised |
| 4289 | A_23_P333029  | C8orf47   | Hs.171455 | chromosome 8 open reading frame 47                         | Homo sapiens chromosome 8 open reading frame 47 (C8orf47), mRNA [NM_173549]                                                                                                         | 20.55785 | down | 13.03977 | down | 2.47516    | 52.68829    | 2.76970    | 31.84703    | Compromised | Detected | Compromised | Detected    |
| 4290 | A_23_P103703  | HSPB7     | Hs.502612 | heat shock 27kDa protein family, member 7 (cardiovascular) | Homo sapiens heat shock 27kDa protein family, member 7 (cardiovascular) (HSPB7), mRNA [NM_014424]                                                                                   | 20.51337 | down | 23.21110 | down | 286.49078  | 6085.28370  | 206.45137  | 4225.50930  | Detected    | Detected | Detected    | Detected    |
| 4291 | A_23_P87011   | TAGLN     | Hs.410977 | transgelin                                                 | Homo sapiens transgelin (TAGLN), transcript variant 1, mRNA [NM_001001522]                                                                                                          | 20.48880 | down | 23.24594 | down | 1784.49610 | 37858.66400 | 2158.99660 | 44255.23000 | Detected    | Detected | Detected    | Detected    |
| 4292 | A_23_P118246  | GINS2     | Hs.433180 | GINS complex subunit 2 (Psf2 homolog)                      | Homo sapiens GINS complex subunit 2 (Psf2 homolog) (GINS2), mRNA [NM_016095]                                                                                                        | 20.36395 | down | 20.33517 | down | 185.42964  | 3909.97680  | 134.80475  | 2417.23240  | Detected    | Detected | Detected    | Detected    |
| 4293 | A_23_P87013   | TAGLN     | Hs.410977 | transgelin                                                 | Homo sapiens transgelin (TAGLN), transcript variant 1, mRNA [NM_001001522]                                                                                                          | 20.32327 | down | 21.35219 | down | 865.50287  | 18213.57000 | 780.93330  | 14703.54000 | Detected    | Detected | Detected    | Detected    |
| 4294 | A_33_P3339361 | ARHGAP11A | Hs.591130 | Rho GTPase activating protein 11A                          | Homo sapiens Rho GTPase activating protein 11A (ARHGAP11A), transcript variant 2, mRNA [NM_199357]                                                                                  | 20.30978 | down | 17.15621 | down | 46.56337   | 979.22546   | 27.35365   | 413.81128   | Detected    | Detected | Detected    | Detected    |
| 4295 | A_33_P3351999 |           |           |                                                            |                                                                                                                                                                                     | 20.29636 | down | 22.45215 | down | 7.29804    | 153.37602   | 3.82377    | 75.70328    | Compromised | Detected | Compromised | Detected    |
| 4296 | A_33_P3231447 | ITGA6     | Hs.133397 | integrin, alpha 6                                          | Homo sapiens integrin, alpha 6 (ITGA6), transcript variant 2, mRNA [NM_00210]                                                                                                       | 20.26199 | down | 18.95910 | down | 6.26121    | 131.36320   | 4.54921    | 76.05343    | Compromised | Detected | Compromised | Detected    |
| 4297 | A_32_P169406  | LOC400043 | Hs.622604 | hypothetical LOC400043                                     | Homo sapiens hypothetical LOC400043 (LOC400043), non-coding RNA [NR_026656]                                                                                                         | 20.26097 | down | 20.48495 | down | 150.84502  | 3164.64010  | 138.94614  | 2509.84520  | Detected    | Detected | Detected    | Detected    |
| 4298 | A_33_P3372217 |           | Hs.656741 |                                                            | Pregnancy-specific beta-1-glycoprotein 5 Precursor (PSBG-5)/Fetal liver non-specific cross-reactive antigen 3 (FL-NCA-3) [Source:UniProtKB/Swiss-Prot;Acc:Q15238] [ENST00000401992] | 20.25916 | down | 15.48512 | down | 2.86589    | 60.11926    | 3.22817    | 44.07943    | Compromised | Detected | Compromised | Detected    |
| 4299 | A_33_P3358208 | PADI1     | Hs.412941 | peptidyl arginine deiminase, type 1                        | Homo sapiens peptidyl arginine deiminase, type 1 (PADI1), mRNA [NM_013358]                                                                                                          | 20.08267 | down | 23.60190 | down | 4.16737    | 86.65952    | 3.39096    | 70.57236    | Compromised | Detected | Compromised | Detected    |
| 4300 | A_33_P3307903 | CDKN3     | Hs.84113  | cyclin-dependent kinase inhibitor 3                        | Homo sapiens cyclin-dependent kinase inhibitor 3 (CDKN3), transcript variant 1, mRNA [NM_005192]                                                                                    | 20.04709 | down | 16.54188 | down | 74.23734   | 1541.01530  | 98.50087   | 1436.78020  | Detected    | Detected | Detected    | Detected    |
| 4301 | A_33_P3233489 |           |           |                                                            |                                                                                                                                                                                     | 20.00280 | down | 9.71222  | down | 4.16698    | 86.30691    | 6.32585    | 54.17547    | Compromised | Detected | Compromised | Detected    |



|      |               |              |           |                                                                     |                                                                                                                                   |          |      |          |      |           |             |           |             |             |          |             |             |
|------|---------------|--------------|-----------|---------------------------------------------------------------------|-----------------------------------------------------------------------------------------------------------------------------------|----------|------|----------|------|-----------|-------------|-----------|-------------|-------------|----------|-------------|-------------|
| 4302 | A_33_P3632937 | LOC100131262 | Hs.657010 | hypothetical LOC100131262                                           | Homo sapiens cDNA FLJ35102 fis, clone PLACE0006474, weakly similar to ADHESIVE PLAQUE MATRIX PROTEIN PRECURSOR [AK092421]         | 19.99840 | down | 20.58349 | down | 443.55368 | 9184.90200  | 276.62120 | 5020.76560  | Detected    | Detected | Detected    | Detected    |
| 4303 | A_23_P150316  | MMP12        | Hs.1695   | matrix metalloproteinase 12 (macrophage elastase)                   | Homo sapiens matrix metalloproteinase 12 (macrophage elastase) (MMP12), mRNA [NM_002426]                                          | 19.99392 | down | 39.26450 | down | 16.04060  | 332.08660   | 6.43880   | 222.93110   | Detected    | Detected | Compromised | Detected    |
| 4304 | A_23_P69179   | LEPREL1      | Hs.374191 | leprecan-like 1                                                     | Homo sapiens leprecan-like 1 (LEPREL1), transcript variant 1, mRNA [NM_018192]                                                    | 19.84439 | down | 20.10372 | down | 151.32020 | 3109.33700  | 131.92650 | 2338.69700  | Detected    | Detected | Detected    | Detected    |
| 4305 | A_23_P258136  | MXRA5        | Hs.369422 | matrix-remodelling associated 5                                     | Homo sapiens matrix-remodelling associated 5 (MXRA5), mRNA [NM_015419]                                                            | 19.74553 | down | 12.66393 | down | 20.71657  | 423.56470   | 24.52761  | 273.89822   | Detected    | Detected | Detected    | Detected    |
| 4306 | A_23_P50990   | CENPO        | Hs.718431 | centromere protein O                                                | Homo sapiens centromere protein O (CENPO), mRNA [NM_024322]                                                                       | 19.58921 | down | 32.51260 | down | 38.82269  | 787.47270   | 25.70120  | 736.83560   | Detected    | Detected | Detected    | Detected    |
| 4307 | A_33_P3271276 | PSG5         | Hs.654415 | pregnancy specific beta-1-glycoprotein 5                            | Homo sapiens pregnancy specific beta-1-glycoprotein 5 (PSG5), transcript variant 2, mRNA [NM_001130014]                           | 19.51882 | down | 23.10241 | down | 363.91020 | 7354.96830  | 304.04443 | 6193.83700  | Detected    | Detected | Detected    | Detected    |
| 4308 | A_23_P118834  | TOP2A        | Hs.156346 | topoisomerase (DNA) II alpha 170kDa                                 | Homo sapiens topoisomerase (DNA) II alpha 170kDa (TOP2A), mRNA [NM_001067]                                                        | 19.44253 | down | 19.36505 | down | 227.44055 | 4578.82500  | 159.51663 | 2723.89280  | Detected    | Detected | Detected    | Detected    |
| 4309 | A_23_P93772   | HoxA5        | Hs.655218 | homeobox A5                                                         | Homo sapiens homeobox A5 (HOXA5), mRNA [NM_019102]                                                                                | 19.32321 | down | 31.22134 | down | 12.14002  | 242.90233   | 5.89308   | 162.24042   | Compromised | Detected | Compromised | Detected    |
| 4310 | A_23_P71328   | MATN2        | Hs.189445 | matrilin 2                                                          | Homo sapiens matrilin 2 (MATN2), transcript variant 2, mRNA [NM_030583]                                                           | 19.15193 | down | 32.14108 | down | 6.90295   | 136.89272   | 4.29967   | 121.86009   | Compromised | Detected | Compromised | Detected    |
| 4311 | A_24_P355967  | HTR2A        | Hs.654586 | 5-hydroxytryptamine (serotonin) receptor 2A                         | Homo sapiens 5-hydroxytryptamine (serotonin) receptor 2A (HTR2A), transcript variant 1, mRNA [NM_000621]                          | 19.14743 | down | 6.66174  | down | 9.45238   | 187.40652   | 20.17256  | 118.49892   | Compromised | Detected | Detected    | Detected    |
| 4312 | A_33_P3397443 | PKMYT1       | Hs.77783  | protein kinase, membrane associated tyrosine/threonine 1            | Homo sapiens protein kinase, membrane associated tyrosine/threonine 1 (PKMYT1), transcript variant 2, mRNA [NM_182687]            | 19.13656 | down | 30.03717 | down | 845.12085 | 16746.18400 | 606.99930 | 16077.28700 | Detected    | Detected | Detected    | Detected    |
| 4313 | A_23_P8961    | IL7          | Hs.591873 | interleukin 7                                                       | Homo sapiens interleukin 7 (IL7), mRNA [NM_000880]                                                                                | 19.05514 | down | 10.33761 | down | 3.94324   | 77.80329    | 3.08973   | 28.16472    | Compromised | Detected | Compromised | Detected    |
| 4314 | A_24_P355944  | EFNB2        | Hs.149239 | ephrin-B2                                                           | Homo sapiens ephrin-B2 (EFNB2), mRNA [NM_004093]                                                                                  | 18.91656 | down | 24.43176 | down | 59.01881  | 1156.02080  | 29.94339  | 645.09140   | Detected    | Detected | Detected    | Detected    |
| 4315 | A_24_P229234  | MYO16        | Hs.656587 | myosin XVI                                                          | Homo sapiens myosin XVI (MYO16), mRNA [NM_015011]                                                                                 | 18.65307 | down | 18.70774 | down | 22.75547  | 439.51047   | 18.95638  | 312.71030   | Detected    | Detected | Detected    | Detected    |
| 4316 | A_24_P62659   | TSPAN2       | Hs.310458 | tetraspanin 2                                                       | Homo sapiens tetraspanin 2 (TSPAN2), mRNA [NM_005725]                                                                             | 18.51908 | down | 4.77308  | down | 2.87176   | 55.06810    | 8.26957   | 34.80544    | Compromised | Detected | Compromised | Detected    |
| 4317 | A_33_P3384942 |              |           |                                                                     |                                                                                                                                   | 18.46194 | down | 1.15349  | down | 2.38558   | 45.60415    | 2.64916   | 2.69456     | Compromised | Detected | Compromised | Compromised |
| 4318 | A_23_P39799   | LOXL3        | Hs.720335 | lysyl oxidase-like 3                                                | Homo sapiens lysyl oxidase-like 3 (LOXL3), mRNA [NM_032603]                                                                       | 18.31738 | down | 14.01972 | down | 61.53202  | 1167.07190  | 58.72586  | 725.99590   | Detected    | Detected | Detected    | Detected    |
| 4319 | A_23_P8801    | CYP3A5       | Hs.695915 | cytochrome P450, family 3, subfamily A, polypeptide 5               | Homo sapiens cytochrome P450, family 3, subfamily A, polypeptide 5 (CYP3A5), mRNA [NM_000777]                                     | 18.31077 | down | 9.85480  | down | 2.44840   | 46.42182    | 2.62805   | 22.83744    | Compromised | Detected | Compromised | Detected    |
| 4320 | A_33_P3229017 |              |           |                                                                     |                                                                                                                                   | 18.30450 | down | 7.91693  | down | 2.34242   | 44.39714    | 2.58156   | 18.02206    | Compromised | Detected | Compromised | Detected    |
| 4321 | A_23_P388146  |              | Hs.642598 |                                                                     | Ubiquitin UBF-1 [Source:UniProtKB/TrEMBL;Acc:Q96JB9] [ENST00000416025]                                                            | 18.06076 | down | 15.07035 | down | 176.48915 | 3300.55700  | 151.90073 | 2018.59190  | Detected    | Detected | Detected    | Detected    |
| 4322 | A_33_P3267003 | LOC100132588 | Hs.689599 | hypothetical protein LOC100132588                                   | PREDICTED: Homo sapiens hypothetical LOC100132588 (LOC100132588), mRNA [XM_001724555]                                             | 17.99580 | down | 25.72898 | down | 5.90499   | 110.03313   | 3.37833   | 76.64602    | Compromised | Detected | Compromised | Detected    |
| 4323 | A_23_P162719  | DIAPH3       | Hs.283127 | diaphanous homolog 3 (Drosophila)                                   | Homo sapiens diaphanous homolog 3 (Drosophila) (DIAPH3), transcript variant 2, mRNA [NM_030932]                                   | 17.95585 | down | 14.45076 | down | 32.37621  | 601.95660   | 47.86552  | 609.92865   | Detected    | Detected | Detected    | Detected    |
| 4324 | A_33_P3311493 | LOC283392    |           | hypothetical LOC283392                                              | Homo sapiens hypothetical LOC283392 (LOC283392), transcript variant 2, non-coding RNA [NR_026836]                                 | 17.83773 | down | 18.79356 | down | 11.27594  | 208.26935   | 6.78669   | 112.46889   | Compromised | Detected | Compromised | Detected    |
| 4325 | A_23_P31073   | MYB          | Hs.606320 | v-myb myeloblastosis viral oncogene homolog (avian)                 | Homo sapiens v-myb myeloblastosis viral oncogene homolog (avian) (MYB), transcript variant 2, mRNA [NM_005375]                    | 17.55907 | down | 8.07867  | down | 3.90972   | 71.08532    | 6.33085   | 45.09901    | Compromised | Detected | Compromised | Detected    |
| 4326 | A_32_P117354  | LIMCH1       | Hs.335163 | LIM and calponin homology domains 1                                 | Homo sapiens LIM and calponin homology domains 1 (LIMCH1), transcript variant 1, mRNA [NM_014988]                                 | 17.50503 | down | 15.70622 | down | 37.94169  | 687.72125   | 28.95370  | 400.99698   | Detected    | Detected | Detected    | Detected    |
| 4327 | A_23_P80902   | KIF15        | Hs.658939 | kinesin family member 15                                            | Homo sapiens kinesin family member 15 (KIF15), mRNA [NM_020242]                                                                   | 17.49431 | down | 18.35486 | down | 54.24877  | 982.69727   | 51.76542  | 837.83075   | Detected    | Detected | Detected    | Detected    |
| 4328 | A_23_P48669   | CDKN3        | Hs.84113  | cyclin-dependent kinase inhibitor 3                                 | Homo sapiens cyclin-dependent kinase inhibitor 3 (CDKN3), transcript variant 1, mRNA [NM_005192]                                  | 17.43738 | down | 17.58140 | down | 540.94354 | 9767.11300  | 474.77963 | 7360.56150  | Detected    | Detected | Detected    | Detected    |
| 4329 | A_23_P161218  | ANKRD1       | Hs.448589 | ankyrin repeat domain 1 (cardiac muscle)                            | Homo sapiens ankyrin repeat domain 1 (cardiac muscle) (ANKRD1), mRNA [NM_014391]                                                  | 17.35818 | down | 19.33692 | down | 27.18278  | 488.57492   | 21.18681  | 361.25885   | Detected    | Detected | Detected    | Detected    |
| 4330 | A_32_P358887  | SLC4A4       | Hs.5462   | solute carrier family 4, sodium bicarbonate cotransporter, member 4 | Homo sapiens solute carrier family 4, sodium bicarbonate cotransporter, member 4 (SLC4A4), transcript variant 2, mRNA [NM_003759] | 17.06936 | down | 19.00681 | down | 19.60631  | 346.53430   | 13.04699  | 218.66792   | Detected    | Detected | Compromised | Detected    |
| 4331 | A_33_P3531206 | PCOTH        | Hs.721128 | prostate collagen triple helix                                      | Homo sapiens prostate collagen triple helix (PCOTH), transcript variant 1, mRNA [NM_001014442]                                    | 17.06187 | down | 11.44608 | down | 6.09393   | 107.66082   | 10.07329  | 101.67017   | Compromised | Detected | Compromised | Detected    |
| 4332 | A_23_P104651  | CDC45        | Hs.434886 | cell division cycle associated 5                                    | Homo sapiens cell division cycle associated 5 (CDC45), mRNA [NM_080668]                                                           | 17.04429 | down | 17.55543 | down | 479.77963 | 8467.47000  | 399.53090 | 6184.82370  | Detected    | Detected | Detected    | Detected    |

|      |               |              |           |                                                                    |                                                                                                                                                                                                                                                                    |          |      |          |      |            |             |            |             |             |          |             |             |
|------|---------------|--------------|-----------|--------------------------------------------------------------------|--------------------------------------------------------------------------------------------------------------------------------------------------------------------------------------------------------------------------------------------------------------------|----------|------|----------|------|------------|-------------|------------|-------------|-------------|----------|-------------|-------------|
| 4333 | A_23_P124642  | RASGRP1      | Hs.591127 | RAS guanyl releasing protein 1 (calcium and DAG-regulated)         | Homo sapiens RAS guanyl releasing protein 1 (calcium and DAG-regulated) (RASGRP1), transcript variant 1, mRNA [NM_005739]                                                                                                                                          | 16.94758 | down | 15.54540 | down | 3.27837    | 57.53051    | 2.68507    | 36.80635    | Compromised | Detected | Compromised | Detected    |
| 4334 | A_33_P3340468 |              | Hs.348920 |                                                                    | Centromere protein I (CENP-1)(Interphase centromere complex protein 19)(Follicle-stimulating hormone primary response protein)(FSH primary response protein 1)(Leucine-rich primary response protein 1) [Source:UniProtKB/Swiss-Prot;Acc:Q92674] [ENST00000403304] | 16.82465 | down | 17.70007 | down | 9.16946    | 159.74335   | 10.91147   | 170.30363   | Compromised | Detected | Compromised | Detected    |
| 4335 | A_24_P792124  | SCN9A        | Hs.439145 | sodium channel, voltage-gated, type IX, alpha subunit              | Homo sapiens sodium channel, voltage-gated, type IX, alpha subunit (SCN9A), mRNA [NM_002977]                                                                                                                                                                       | 16.81000 | down | 2.92126  | down | 2.97357    | 51.75820    | 3.32227    | 8.55795     | Compromised | Detected | Compromised | Compromised |
| 4336 | A_24_P174294  | LRRTM4       | Hs.285782 | leucine rich repeat transmembrane neuronal 4                       | Homo sapiens leucine rich repeat transmembrane neuronal 4 (LRRTM4), transcript variant 2, mRNA [NM_024993]                                                                                                                                                         | 16.79906 | down | 1.18548  | down | 2.35314    | 40.93218    | 2.54101    | 2.65623     | Compromised | Detected | Compromised | Compromised |
| 4337 | A_23_P19663   | CTGF         | Hs.410037 | connective tissue growth factor                                    | Homo sapiens connective tissue growth factor (CTGF), mRNA [NM_001901]                                                                                                                                                                                              | 16.63821 | down | 16.92576 | down | 1382.83520 | 23823.74400 | 1178.33010 | 17586.55500 | Detected    | Detected | Detected    | Detected    |
| 4338 | A_24_P923381  | EPR1         |           | effector cell peptidase receptor 1 (non-protein coding)            | Homo sapiens effector cell peptidase receptor 1 (non-protein coding) (EPR1), non-coding RNA [NR_002219]                                                                                                                                                            | 16.59728 | down | 39.36136 | down | 4.94781    | 85.03212    | 3.57990    | 124.25302   | Compromised | Detected | Compromised | Detected    |
| 4339 | A_33_P3303810 | LAD1         | Hs.519035 | ladinin 1                                                          | Homo sapiens ladinin 1 (LAD1), mRNA [NM_005558]                                                                                                                                                                                                                    | 16.51625 | down | 1.33313  | down | 2.35458    | 40.26772    | 2.54835    | 2.99570     | Compromised | Detected | Compromised | Compromised |
| 4340 | A_32_P101031  | LYPD1        | Hs.719231 | LY6/PLAUR domain containing 1                                      | Homo sapiens LY6/PLAUR domain containing 1 (LYPD1), transcript variant 1, mRNA [NM_144586]                                                                                                                                                                         | 16.44540 | down | 12.44859 | down | 2.32768    | 39.63695    | 2.49361    | 27.37243    | Compromised | Detected | Compromised | Detected    |
| 4341 | A_33_P3392187 | CCDC85A      | Hs.117136 | coiled-coil domain containing 85A                                  | Homo sapiens coiled-coil domain containing 85A (CCDC85A), mRNA [NM_001080433]                                                                                                                                                                                      | 16.38398 | down | 13.79487 | down | 11.20793   | 190.14186   | 11.74969   | 142.92550   | Compromised | Detected | Compromised | Detected    |
| 4342 | A_24_P88763   | LOXL3        | Hs.720335 | lysyl oxidase-like 3                                               | Homo sapiens lysyl oxidase-like 3 (LOXL3), mRNA [NM_029603]                                                                                                                                                                                                        | 16.36449 | down | 18.61668 | down | 321.03964  | 5439.94040  | 327.09680  | 5369.62600  | Detected    | Detected | Detected    | Detected    |
| 4343 | A_33_P3283944 | LOC100133690 | Hs.625330 | hypothetical protein LOC100133690                                  | PREDICTED: Homo sapiens hypothetical LOC100133690 (LOC100133690), mRNA [XM_001720217]                                                                                                                                                                              | 16.31190 | down | 15.69316 | down | 5.12165    | 86.50619    | 6.60534    | 91.40518    | Compromised | Detected | Compromised | Detected    |
| 4344 | A_23_P168368  | C7orf69      | Hs.287647 | chromosome 7 open reading frame 69                                 | Homo sapiens chromosome 7 open reading frame 69 (C7orf69), mRNA [NM_025031]                                                                                                                                                                                        | 16.30508 | down | 1.18518  | down | 2.35173    | 39.70477    | 2.54654    | 2.66135     | Compromised | Detected | Compromised | Compromised |
| 4345 | A_23_P59807   | WNT2         | Hs.567356 | wingless-type MMTV integration site family member 2                | Homo sapiens wingless-type MMTV integration site family member 2 (WNT2), transcript variant 1, mRNA [NM_003391]                                                                                                                                                    | 16.28387 | down | 7.07583  | down | 2.35561    | 39.71857    | 2.53895    | 15.84151    | Compromised | Detected | Compromised | Detected    |
| 4346 | A_23_P361419  | DEPDC1B      | Hs.482233 | DEP domain containing 1B                                           | Homo sapiens DEP domain containing 1B (DEPDC1B), transcript variant 1, mRNA [NM_018369]                                                                                                                                                                            | 16.25246 | down | 16.90686 | down | 59.24345   | 996.99400   | 38.78222   | 578.17737   | Detected    | Detected | Detected    | Detected    |
| 4347 | A_23_P253752  | FAM54A       | Hs.121536 | family with sequence similarity 54, member A                       | Homo sapiens family with sequence similarity 54, member A (FAM54A), transcript variant 2, mRNA [NM_138419]                                                                                                                                                         | 15.96278 | down | 16.31740 | down | 213.55846  | 3529.86800  | 163.92441  | 2358.63160  | Detected    | Detected | Detected    | Detected    |
| 4348 | A_33_P3221284 | CCDC80       | Hs.477128 | coiled-coil domain containing 80                                   | Homo sapiens coiled-coil domain containing 80 (CCDC80), transcript variant 1, mRNA [NM_199511]                                                                                                                                                                     | 15.87280 | down | 17.41781 | down | 50.18488   | 824.81036   | 31.70135   | 486.89645   | Detected    | Detected | Detected    | Detected    |
| 4349 | A_23_P315815  | NRG1         | Hs.453951 | neuregulin 1                                                       | Homo sapiens neuregulin 1 (NRG1), transcript variant HRG-gamma, mRNA [NM_004495]                                                                                                                                                                                   | 15.87181 | down | 11.29507 | down | 16.08250   | 264.30966   | 22.70604   | 226.14952   | Detected    | Detected | Detected    | Detected    |
| 4350 | A_23_P74059   | NPPA         | Hs.75640  | natriuretic peptide precursor A                                    | Homo sapiens natriuretic peptide precursor A (NPPA), mRNA [NM_006172]                                                                                                                                                                                              | 15.85257 | down | 1.18280  | down | 2.34556    | 38.50171    | 2.53344    | 2.64233     | Compromised | Detected | Compromised | Compromised |
| 4351 | A_33_P3390367 | LOC91149     | Hs.711021 | hypothetical protein LOC91149                                      | Homo sapiens hypothetical protein LOC91149 (LOC91149), non-coding RNA [NR_026995]                                                                                                                                                                                  | 15.82700 | down | 1.17735  | down | 2.25635    | 36.97755    | 2.34839    | 2.43805     | Compromised | Detected | Compromised | Compromised |
| 4352 | A_23_P92441   | MAD2L1       | Hs.591697 | MAD2 mitotic arrest deficient-like 1 (yeast)                       | Homo sapiens MAD2 mitotic arrest deficient-like 1 (yeast) (MAD2L1), mRNA [NM_002358]                                                                                                                                                                               | 15.58743 | down | 15.48211 | down | 400.73703  | 6467.95460  | 389.73584  | 5320.66500  | Detected    | Detected | Detected    | Detected    |
| 4353 | A_23_P303072  | GRIA1        | Hs.519693 | glutamate receptor, ionotropic, AMPA 1                             | Homo sapiens glutamate receptor, ionotropic, AMPA 1 (GRIA1), transcript variant 1, mRNA [NM_000627]                                                                                                                                                                | 15.56085 | down | 16.97557 | down | 3.36312    | 54.18872    | 2.92022    | 43.71250    | Compromised | Detected | Compromised | Detected    |
| 4354 | A_23_P206059  | PRC1         | Hs.567385 | protein regulator of cytokinesis 1                                 | Homo sapiens protein regulator of cytokinesis 1 (PRC1), transcript variant 1, mRNA [NM_003961]                                                                                                                                                                     | 15.48923 | down | 15.60178 | down | 1404.72850 | 22529.69700 | 1091.34190 | 15014.13700 | Detected    | Detected | Detected    | Detected    |
| 4355 | A_23_P349566  | CCDC85A      | Hs.117136 | coiled-coil domain containing 85A                                  | Homo sapiens coiled-coil domain containing 85A (CCDC85A), mRNA [NM_001080433]                                                                                                                                                                                      | 15.48223 | down | 26.49447 | down | 23.81696   | 381.81494   | 8.78801    | 205.31049   | Detected    | Detected | Compromised | Detected    |
| 4356 | A_23_P88731   | RAD51        | Hs.631709 | RAD51 homolog (RecA homolog, E. coli) (S. cerevisiae)              | Homo sapiens RAD51 homolog (RecA homolog, E. coli) (S. cerevisiae) (RAD51), transcript variant 1, mRNA [NM_002875]                                                                                                                                                 | 15.45946 | down | 15.49924 | down | 307.68988  | 4925.38800  | 234.41080  | 3203.71220  | Detected    | Detected | Detected    | Detected    |
| 4357 | A_23_P106389  | SEMA7A       | Hs.24640  | semaphorin 7A, GPI membrane anchor (John Milton Hagen blood group) | Homo sapiens semaphorin 7A, GPI membrane anchor (John Milton Hagen blood group) (SEMA7A), transcript variant 1, mRNA [NM_003612]                                                                                                                                   | 15.39454 | down | 18.77460 | down | 156.63383  | 2496.80880  | 101.89106  | 1686.83400  | Detected    | Detected | Detected    | Detected    |
| 4358 | A_24_P136866  | SLC8A1       | Hs.468274 | solute carrier family 8 (sodium/calcium exchanger), member 1       | Homo sapiens solute carrier family 8 (sodium/calcium exchanger), member 1 (SLC8A1), transcript variant A, mRNA [NM_021097]                                                                                                                                         | 15.35800 | down | 14.83782 | down | 37.23408   | 592.11790   | 33.32348   | 435.99924   | Detected    | Detected | Detected    | Detected    |
| 4359 | A_33_P3215640 | PI16         | Hs.720179 | peptidase inhibitor 16                                             | Homo sapiens peptidase inhibitor 16 (PI16), mRNA [NM_153370]                                                                                                                                                                                                       | 15.33325 | down | 16.68089 | down | 75.91495   | 1205.29880  | 80.89175   | 1189.84070  | Detected    | Detected | Detected    | Detected    |

|      |               |           |           |                                                              |                                                                                                                                                                         |          |      |          |      |           |             |           |            |             |              |              |             |
|------|---------------|-----------|-----------|--------------------------------------------------------------|-------------------------------------------------------------------------------------------------------------------------------------------------------------------------|----------|------|----------|------|-----------|-------------|-----------|------------|-------------|--------------|--------------|-------------|
| 4360 | A_33_P3403963 | ST8SIA6   | Hs.677766 | ST8 alpha-N-acetyl-neuraminide alpha-2,8-sialyltransferase 6 | Homo sapiens ST8 alpha-N-acetyl-neuraminide alpha-2,8-sialyltransferase 6 (ST8SIA6), mRNA [NM_001004470]                                                                | 15.30703 | down | 1.17841  | down | 2.28488   | 36.21488    | 2.40743   | 2.50158    | Compromised | Detected     | Compromised  | Compromised |
| 4361 | A_23_P112554  | COL15A1   | Hs.409034 | collagen, type XV, alpha 1                                   | Homo sapiens collagen, type XV, alpha 1 (COL15A1), mRNA [NM_001855]                                                                                                     | 15.17349 | down | 9.03242  | down | 12.94998  | 203.46391   | 12.76627  | 101.67959  | Detected    | Detected     | Not Detected | Detected    |
| 4362 | A_32_P152696  | LOC729983 | Hs.648133 | hypothetical LOC729983                                       | PREDICTED: Homo sapiens hypothetical LOC729983 (LOC729983), mRNA [XM_001718065]                                                                                         | 15.13777 | down | 16.48681 | down | 122.57666 | 1921.33350  | 90.10722  | 1309.97080 | Detected    | Detected     | Detected     | Detected    |
| 4363 | A_23_P216579  | PALM2     | Hs.591908 | paralelmin 2                                                 | Homo sapiens paralelmin 2 (PALM2), transcript variant 1, mRNA [NM_053016]                                                                                               | 15.12958 | down | 5.43421  | down | 2.40476   | 37.67316    | 4.88503   | 23.40827   | Compromised | Detected     | Compromised  | Detected    |
| 4364 | A_33_P3257678 | HIST2H3A  | Hs.706618 | histone cluster 2, H3a                                       | Homo sapiens histone cluster 2, H3a (HIST2H3A), mRNA [NM_001005464]                                                                                                     | 15.04909 | down | 17.76087 | down | 12.58176  | 196.05806   | 9.20432   | 144.15216  | Detected    | Detected     | Compromised  | Detected    |
| 4365 | A_33_P3268555 | SP140     | Hs.632549 | SP140 nuclear body protein                                   | Homo sapiens SP140 nuclear body protein (SP140), transcript variant 2, mRNA [NM_001005176]                                                                              | 14.99314 | down | 19.09365 | down | 5.61608   | 87.18847    | 3.04745   | 51.30871   | Compromised | Detected     | Compromised  | Detected    |
| 4366 | A_23_P57379   | CDC45L    | Hs.474217 | CDC45 cell division cycle 45-like (S. cerevisiae)            | Homo sapiens CDC45 cell division cycle 45-like (S. cerevisiae) (CDC45L), mRNA [NM_003504]                                                                               | 14.98852 | down | 18.79490 | down | 438.00662 | 6797.86300  | 347.46466 | 5788.59000 | Detected    | Detected     | Detected     | Detected    |
| 4367 | A_33_P3413741 | OXTR      | Hs.2820   | oxytocin receptor                                            | Homo sapiens oxytocin receptor (OXTR), mRNA [NM_000816]                                                                                                                 | 14.92857 | down | 14.90245 | down | 122.57455 | 1894.74850  | 71.96461  | 945.67554  | Detected    | Detected     | Detected     | Detected    |
| 4368 | A_23_P380318  | EGR4      | Hs.3052   | early growth response 4                                      | Homo sapiens early growth response 4 (EGR4), mRNA [NM_001965]                                                                                                           | 14.87685 | down | 18.41871 | down | 24.95375  | 384.39703   | 20.23956  | 328.71967  | Detected    | Detected     | Detected     | Detected    |
| 4369 | A_23_P101671  | ATCAY     | Hs.418055 | ataxia, cerebellar, Cayman type                              | Homo sapiens ataxia, cerebellar, Cayman type (ATCAY), mRNA [NM_033064]                                                                                                  | 14.85363 | down | 1.44656  | down | 2.46193   | 37.86528    | 2.85531   | 3.42527    | Compromised | Not Detected | Compromised  | Compromised |
| 4370 | A_33_P3230017 | AURKAPS1  |           | aurora kinase A pseudogene 1                                 | Homo sapiens aurora kinase A pseudogene 1 (AURKAPS1), non-coding RNA [NR_001587]                                                                                        | 14.84050 | down | 12.13505 | down | 151.15030 | 2322.68630  | 104.20519 | 1115.05490 | Detected    | Detected     | Detected     | Detected    |
| 4371 | A_33_P3394883 |           | Hs.579975 |                                                              | Putative uncharacterized protein ENSP00000386758 [Source:UniProtKB/TrEMBL;Acc:B8ZZS8] [ENST00000409910]                                                                 | 14.82705 | down | 7.81925  | down | 2.35522   | 36.15933    | 2.53591   | 17.48495   | Compromised | Detected     | Compromised  | Detected    |
| 4372 | A_24_P882732  |           | Hs.579266 |                                                              | cDNA FLJ61294, highly similar to Keratin, type I cytoskeletal 17 [Source:UniProtKB/TrEMBL;Acc:BJDJM5] [ENST00000300992]                                                 | 14.80811 | down | 14.77870 | down | 2.76101   | 42.33516    | 3.36381   | 43.83626   | Compromised | Detected     | Compromised  | Detected    |
| 4373 | A_23_P83818   | COL5A1    | Hs.210283 | collagen, type V, alpha 1                                    | Homo sapiens collagen, type V, alpha 1 (COL5A1), mRNA [NM_000093]                                                                                                       | 14.79478 | down | 16.72622 | down | 233.04053 | 3570.03980  | 228.51959 | 3340.94240 | Detected    | Detected     | Detected     | Detected    |
| 4374 | A_23_P66732   | GS2       | Hs.534059 | germ cell associated 2 (haspin)                              | Homo sapiens germ cell associated 2 (haspin) (GS2), mRNA [NM_031965]                                                                                                    | 14.73273 | down | 15.78214 | down | 19.45279  | 296.75510   | 15.50430  | 215.76633  | Detected    | Detected     | Detected     | Detected    |
| 4375 | A_33_P3346331 |           |           |                                                              | Putative uncharacterized protein ENSP00000384476 [Source:UniProtKB/TrEMBL;Acc:B5MCL6] [ENST00000403628]                                                                 | 14.73241 | down | 12.38074 | down | 37.21508  | 567.70900   | 38.32880  | 418.44406  | Detected    | Detected     | Detected     | Detected    |
| 4376 | A_32_P24376   |           | Hs.406714 |                                                              | Keratin-associated protein 2-4 (Keratin-associated protein 2.4) (High sulfur keratin-associated protein 2.4) [Source:UniProtKB/Swiss-Prot;Acc:Q9BYR9] [ENST00000391418] | 14.69707 | down | 23.33356 | down | 33.58148  | 511.05017   | 20.78677  | 427.69443  | Detected    | Detected     | Detected     | Detected    |
| 4377 | A_23_P150343  | SLN       | Hs.334829 | sarcolipin                                                   | Homo sapiens sarcolipin (SLN), mRNA [NM_003063]                                                                                                                         | 14.68563 | down | 9.20060  | down | 2.53021   | 38.47531    | 2.71960   | 22.06412   | Compromised | Detected     | Compromised  | Detected    |
| 4378 | A_32_P224525  | COL6A6    | Hs.591282 | collagen, type VI, alpha 6                                   | Homo sapiens collagen type VI alpha 6 (COL6A6), mRNA [NM_001102808]                                                                                                     | 14.66730 | down | 10.34248 | down | 2.68150   | 40.72498    | 3.22207   | 29.38497   | Compromised | Detected     | Compromised  | Detected    |
| 4379 | A_33_P3322363 | HMSD      | Hs.721604 | histocompatibility (minor) serpin domain containing          | Homo sapiens histocompatibility (minor) serpin domain containing (HMSD), mRNA [NM_001123366]                                                                            | 14.58066 | down | 7.71276  | down | 14.86305  | 224.39763   | 25.78065  | 175.33514  | Detected    | Detected     | Detected     | Detected    |
| 4380 | A_24_P3249    | RARB      | Hs.719896 | retinoic acid receptor, beta                                 | Homo sapiens retinoic acid receptor, beta (RARB), transcript variant 1, mRNA [NM_000965]                                                                                | 14.35181 | down | 15.74028 | down | 2.31652   | 34.42521    | 2.47098   | 34.29633   | Compromised | Detected     | Compromised  | Detected    |
| 4381 | A_23_P29723   | SGOL1     | Hs.105153 | shugoshin-like 1 (S. pombe)                                  | Homo sapiens shugoshin-like 1 (S. pombe) (SGOL1), transcript variant A2, mRNA [NM_001012410]                                                                            | 14.31705 | down | 22.82700 | down | 9.41642   | 139.59583   | 4.46658   | 89.90624   | Compromised | Detected     | Compromised  | Detected    |
| 4382 | A_33_P3327097 |           |           |                                                              | Myotubularin-related protein 1 (EC 3.1.3.-) [Source:UniProtKB/Swiss-Prot;Acc:Q13613] [ENST00000370387]                                                                  | 14.25575 | down | 4.07706  | down | 2.58600   | 38.17262    | 4.57051   | 16.43150   | Compromised | Detected     | Compromised  | Detected    |
| 4383 | A_23_P131866  | AURKA     | Hs.250822 | aurora kinase A                                              | Homo sapiens aurora kinase A (AURKA), transcript variant 1, mRNA [NM_198433]                                                                                            | 14.13860 | down | 16.27255 | down | 567.97100 | 8315.06600  | 501.28497 | 7192.92870 | Detected    | Detected     | Detected     | Detected    |
| 4384 | A_23_P18579   | PTTG2     | Hs.668806 | pituitary tumor-transforming 2                               | Homo sapiens pituitary tumor-transforming 2 (PTTG2), mRNA [NM_006607]                                                                                                   | 14.11966 | down | 13.88121 | down | 712.10800 | 10411.25700 | 735.17993 | 8998.83700 | Detected    | Detected     | Detected     | Detected    |
| 4385 | A_33_P3281651 |           |           |                                                              |                                                                                                                                                                         | 14.07708 | down | 10.79814 | down | 2.44818   | 35.68527    | 2.60727   | 24.82567   | Compromised | Detected     | Compromised  | Detected    |
| 4386 | A_32_P210202  | E2F7      | Hs.416375 | E2F transcription factor 7                                   | Homo sapiens E2F transcription factor 7 (E2F7), mRNA [NM_203394]                                                                                                        | 14.04911 | down | 12.91462 | down | 412.02400 | 5993.82800  | 307.05228 | 3496.70870 | Detected    | Detected     | Detected     | Detected    |
| 4387 | A_23_P106617  | WFDC1     | Hs.36688  | WAP four-disulfide core domain 1                             | Homo sapiens WAP four-disulfide core domain 1 (WFDC1), mRNA [NM_021197]                                                                                                 | 14.04215 | down | 13.28701 | down | 14.54028  | 211.41685   | 13.83263  | 162.06807  | Detected    | Detected     | Detected     | Detected    |
| 4388 | A_24_P200854  | HOXA2     | Hs.592177 | homeobox A2                                                  | Homo sapiens homeobox A2 (HOXA2), mRNA [NM_006735]                                                                                                                      | 13.90796 | down | 13.21049 | down | 2.32121   | 33.42809    | 2.48151   | 28.90680   | Compromised | Detected     | Compromised  | Detected    |
| 4389 | A_32_P148538  | LPPR4     | Hs.13245  | lipid phosphate phosphatase-related protein type 4           | Homo sapiens lipid phosphate phosphatase-related protein type 4 (LPPR4), transcript variant 1, mRNA [NM_014839]                                                         | 13.89708 | down | 8.58384  | down | 8.97728   | 129.18188   | 12.65608  | 95.79578   | Compromised | Detected     | Compromised  | Detected    |
| 4390 | A_33_P3232080 | CD177     | Hs.232165 | CD177 molecule                                               | Homo sapiens CD177 molecule (CD177), mRNA [NM_020406]                                                                                                                   | 13.89089 | down | 1.17740  | down | 2.25727   | 32.46732    | 2.35057   | 2.44042    | Compromised | Detected     | Compromised  | Compromised |
| 4391 | A_23_P60016   | PTTG3P    | Hs.647156 | pituitary tumor-transforming 3 (pseudogene)                  | Homo sapiens pituitary tumor-transforming 3 (pseudogene) (PTTG3P), non-coding RNA [NR_002734]                                                                           | 13.88853 | down | 14.47208 | down | 65.51600  | 942.18630   | 86.40104  | 1102.59380 | Detected    | Detected     | Detected     | Detected    |

|      |               |              |           |                                                           |                                                                                                         |          |      |          |      |            |             |            |             |             |          |             |             |
|------|---------------|--------------|-----------|-----------------------------------------------------------|---------------------------------------------------------------------------------------------------------|----------|------|----------|------|------------|-------------|------------|-------------|-------------|----------|-------------|-------------|
| 4392 | A_33_P3225397 |              |           |                                                           |                                                                                                         | 13.71370 | down | 5.69887  | down | 2.42159    | 34.38652    | 6.62371    | 33.28554    | Compromised | Detected | Compromised | Detected    |
| 4393 | A_23_P74115   | RAD54L       | Hs.642042 | RAD54-like (S. cerevisiae)                                | Homo sapiens RAD54-like (S. cerevisiae) (RAD54L), transcript variant 1, mRNA [NM_003579]                | 13.70042 | down | 12.96182 | down | 149.28099  | 2117.73360  | 135.04740  | 1543.53960  | Detected    | Detected | Detected    | Detected    |
| 4394 | A_23_P13094   | MMP10        | Hs.2258   | matrix metalloproteinase 10 (stromelysin 2)               | Homo sapiens matrix metalloproteinase 10 (stromelysin 2) (MMP10), mRNA [NM_002425]                      | 13.63642 | down | 13.65127 | down | 46.99143   | 663.51680   | 29.52284   | 355.38312   | Detected    | Detected | Detected    | Detected    |
| 4395 | A_23_P408955  | E2F2         | Hs.194333 | E2F transcription factor 2                                | Homo sapiens E2F transcription factor 2 (E2F2), mRNA [NM_004091]                                        | 13.62002 | down | 12.71674 | down | 36.62947   | 516.58480   | 39.07835   | 438.20502   | Detected    | Detected | Detected    | Detected    |
| 4396 | A_33_P3364263 | LBH          | Hs.567598 | limb bud and heart development homolog (mouse)            | Homo sapiens limb bud and heart development homolog (mouse) (LBH), mRNA [NM_030915]                     | 13.55677 | down | 8.28714  | down | 15.72169   | 220.69296   | 22.99169   | 168.01231   | Detected    | Detected | Detected    | Detected    |
| 4397 | A_24_P943894  | SCUBE3       | Hs.12923  | signal peptide, CUB domain, EGF-like 3                    | Homo sapiens signal peptide, CUB domain, EGF-like 3 (SCUBE3), mRNA [NM_152753]                          | 13.50958 | down | 13.61309 | down | 53.05150   | 742.11725   | 42.05413   | 504.81348   | Detected    | Detected | Detected    | Detected    |
| 4398 | A_24_P254705  | ZNF695       | Hs.668893 | zinc finger protein 695                                   | Homo sapiens zinc finger protein 695 (ZNF695), mRNA [NM_020394]                                         | 13.49622 | down | 21.29071 | down | 12.26119   | 171.34747   | 5.81895    | 109.24460   | Compromised | Detected | Compromised | Detected    |
| 4399 | A_32_P142440  | PCSK9        | Hs.18844  | proprotein convertase subtilisin/kexin type 9             | Homo sapiens proprotein convertase subtilisin/kexin type 9 (PCSK9), mRNA [NM_174936]                    | 13.46607 | down | 4.49118  | down | 2.92709    | 40.81410    | 5.23401    | 20.72815    | Compromised | Detected | Compromised | Detected    |
| 4400 | A_33_P3258339 | C17orf76     | Hs.25425  | chromosome 17 open reading frame 76                       | Homo sapiens chromosome 17 open reading frame 76 (C17orf76), transcript variant 1, mRNA [NM_001113567]  | 13.46549 | down | 5.30512  | down | 47.81069   | 666.62280   | 34.30236   | 160.46663   | Detected    | Detected | Detected    | Detected    |
| 4401 | A_23_P40527   | TBX1         | Hs.173984 | T-box 1                                                   | Homo sapiens T-box 1 (TBX1), transcript variant A, mRNA [NM_080646]                                     | 13.35310 | down | 15.45019 | down | 2.28643    | 31.61358    | 2.37873    | 32.40739    | Compromised | Detected | Compromised | Detected    |
| 4402 | A_23_P50946   | RAMP1        | Hs.471783 | receptor (G protein-coupled) activity modifying protein 1 | Homo sapiens receptor (G protein-coupled) activity modifying protein 1 (RAMP1), mRNA [NM_005855]        | 13.30559 | down | 18.52193 | down | 29.14492   | 4015.42330  | 233.02104  | 3805.80710  | Detected    | Detected | Detected    | Detected    |
| 4403 | A_33_P3286422 | FANCA        | Hs.719210 | Fanconi anemia, complementation group A                   | Homo sapiens Fanconi anemia, complementation group A (FANCA), transcript variant 2, mRNA [NM_001018112] | 13.06998 | down | 13.46745 | down | 34.67760   | 469.30685   | 27.57285   | 327.44055   | Detected    | Detected | Detected    | Detected    |
| 4404 | A_24_P100517  | C9orf140     | Hs.19322  | chromosome 9 open reading frame 140                       | Homo sapiens chromosome 9 open reading frame 140 (C9orf140), mRNA [NM_178448]                           | 13.06831 | down | 16.01504 | down | 68.86566   | 931.86950   | 70.17153   | 990.95636   | Detected    | Detected | Detected    | Detected    |
| 4405 | A_33_P3386262 | CDT1         | Hs.122908 | chromatin licensing and DNA replication factor 1          | Homo sapiens chromatin licensing and DNA replication factor 1 (CDT1), mRNA [NM_030928]                  | 13.05675 | down | 13.26437 | down | 320.29288  | 4330.27540  | 284.40067  | 3326.46400  | Detected    | Detected | Detected    | Detected    |
| 4406 | A_24_P414658  |              | Hs.51011  |                                                           | Histone H2A type 1 (H2A1)(H2A/p) [Source:UniProtKB/Swiss-Prot;Acc:P0C058] [ENST00000359193]             | 13.05050 | down | 8.30552  | down | 2.31405    | 31.27040    | 2.50763    | 18.36517    | Compromised | Detected | Compromised | Detected    |
| 4407 | A_23_P58706   | SPINK5L3     | Hs.483771 | serine PI Kazal type 5-like 3                             | Homo sapiens serine PI Kazal type 5-like 3 (SPINK5L3), mRNA [NM_001040129]                              | 13.04836 | down | 1.84752  | down | 2.43811    | 32.94138    | 7.52278    | 12.25554    | Compromised | Detected | Compromised | Compromised |
| 4408 | A_32_P99032   | LOC100240734 |           | hypothetical LOC100240734                                 | Homo sapiens hypothetical LOC100240734 (LOC100240734), non-coding RNA [NR_026657]                       | 12.96689 | down | 8.48301  | down | 3.28706    | 44.13436    | 3.32096    | 24.70979    | Compromised | Detected | Compromised | Detected    |
| 4409 | A_23_P58082   | CCDC80       | Hs.477128 | coiled-coil domain containing 80                          | Homo sapiens coiled-coil domain containing 80 (CCDC80), transcript variant 1, mRNA [NM_199511]          | 12.95135 | down | 11.50418 | down | 2330.53760 | 31253.89500 | 3079.08180 | 31235.05900 | Detected    | Detected | Detected    | Detected    |
| 4410 | A_23_P50250   | CKM          | Hs.334347 | creatine kinase, muscle                                   | Homo sapiens creatine kinase, muscle (CKM), mRNA [NM_001824]                                            | 12.89479 | down | 10.53750 | down | 2.68216    | 35.54530    | 4.25211    | 39.51002    | Compromised | Detected | Compromised | Detected    |
| 4411 | A_23_P359214  | LOC728449    | Hs.463110 | hypothetical protein LOC728449                            | Putative uncharacterized protein ENSP00000334090 [Source:UniProtKB/TrEMBL;Acc:A6NF06] [ENST00000335083] | 12.83588 | down | 18.52038 | down | 18.79105   | 249.75244   | 17.23053   | 281.39346   | Detected    | Detected | Detected    | Detected    |
| 4412 | A_33_P3421985 |              |           |                                                           |                                                                                                         | 12.75097 | down | 2.47442  | down | 2.86596    | 37.83955    | 6.36247    | 13.88242    | Compromised | Detected | Compromised | Detected    |
| 4413 | A_23_P7636    | PTTG1        | Hs.350966 | pituitary tumor-transforming 1                            | Homo sapiens pituitary tumor-transforming 1 (PTTG1), mRNA [NM_004219]                                   | 12.71349 | down | 11.79510 | down | 5674.05100 | 74694.92000 | 4648.53100 | 50428.64500 | Detected    | Detected | Detected    | Detected    |
| 4414 | A_23_P251043  | TMEM90B      | Hs.124638 | transmembrane protein 90B                                 | Homo sapiens transmembrane protein 90B (TMEM90B), mRNA [NM_024893]                                      | 12.55207 | down | 10.09717 | down | 4.93395    | 64.12730    | 6.77633    | 60.33364    | Compromised | Detected | Compromised | Detected    |
| 4415 | A_33_P3274710 |              |           |                                                           |                                                                                                         | 12.52025 | down | 3.42133  | down | 2.28297    | 29.59687    | 2.37813    | 7.17458     | Compromised | Detected | Compromised | Compromised |
| 4416 | A_23_P250136  | GRIK2        | Hs.98262  | glutamate receptor, ionotropic, kainate 2                 | Homo sapiens glutamate receptor, ionotropic, kainate 2 (GRIK2), transcript variant 2, mRNA [NM_175768]  | 12.48016 | down | 6.07048  | down | 2.41499    | 31.20818    | 2.93013    | 15.68465    | Compromised | Detected | Compromised | Detected    |
| 4417 | A_24_P175612  | SFXN2        | Hs.44070  | sideroflexin 2                                            | Homo sapiens sideroflexin 2 (SFXN2), mRNA [NM_178858]                                                   | 12.47563 | down | 34.22838 | down | 9.20619    | 118.92561   | 2.55625    | 77.15347    | Compromised | Detected | Compromised | Detected    |
| 4418 | A_33_P3212305 | LZTS1        | Hs.521432 | leucine zipper, putative tumor suppressor 1               | Homo sapiens leucine zipper, putative tumor suppressor 1 (LZTS1), mRNA [NM_021020]                      | 12.41443 | down | 1.19610  | down | 3.11246    | 40.00953    | 2.68269    | 2.82946     | Compromised | Detected | Compromised | Compromised |
| 4419 | A_23_P121064  | PTX3         | Hs.591286 | pentraxin-related gene, rapidly induced by IL-1 beta      | Homo sapiens pentraxin-related gene, rapidly induced by IL-1 beta (PTX3), mRNA [NM_002852]              | 12.39700 | down | 12.15968 | down | 972.81750  | 12487.65800 | 677.31525  | 7262.37300  | Detected    | Detected | Detected    | Detected    |
| 4420 | A_33_P3298930 | LOC389300    | Hs.254516 | similar to hCG1654959                                     | PREDICTED: Homo sapiens similar to hCG1654959 (LOC389300), mRNA [XM_001714293]                          | 12.37907 | down | 11.17368 | down | 8.30819    | 106.49459   | 4.20289    | 41.41038    | Compromised | Detected | Compromised | Detected    |
| 4421 | A_33_P3901921 | C12orf48     | Hs.330663 | chromosome 12 open reading frame 48                       | Homo sapiens chromosome 12 open reading frame 48 (C12orf48), mRNA [NM_017915]                           | 12.32767 | down | 7.74855  | down | 5.88287    | 75.09372    | 10.61924   | 72.55701    | Compromised | Detected | Compromised | Detected    |
| 4422 | A_32_P198731  | NEURL1B      | Hs.91521  | neurulized homolog 1B (Drosophila)                        | Homo sapiens neurulized homolog 1B (Drosophila) (NEURL1B), mRNA [NM_001142851]                          | 12.31738 | down | 10.96406 | down | 64.51976   | 822.89450   | 56.42166   | 545.48486   | Detected    | Detected | Detected    | Detected    |
| 4423 | A_24_P200219  | UPK1B        | Hs.271580 | uropod protein 1B                                         | Homo sapiens uropod protein 1B (UPK1B), mRNA [NM_006952]                                                | 12.29000 | down | 1.18538  | down | 2.51242    | 31.97251    | 2.86027    | 2.98971     | Compromised | Detected | Compromised | Compromised |
| 4424 | A_23_P92730   | HSPB3        | Hs.41707  | heat shock 27kDa protein 3                                | Homo sapiens heat shock 27kDa protein 3 (HSPB3), mRNA [NM_006308]                                       | 12.27595 | down | 12.65127 | down | 272.07672  | 3458.43400  | 274.89764  | 3066.69500  | Detected    | Detected | Detected    | Detected    |

|      |               |          |           |                                                                                                   |                                                                                                                                                                                                         |          |      |          |      |           |            |           |            |             |          |             |             |
|------|---------------|----------|-----------|---------------------------------------------------------------------------------------------------|---------------------------------------------------------------------------------------------------------------------------------------------------------------------------------------------------------|----------|------|----------|------|-----------|------------|-----------|------------|-------------|----------|-------------|-------------|
| 4425 | A_23_P366983  | TRHDE    | Hs.199814 | thyrotropin-releasing hormone degrading enzyme                                                    | Homo sapiens thyrotropin-releasing hormone degrading enzyme (TRHDE). mRNA [NM_013381]                                                                                                                   | 12.26854 | down | 5.54106  | down | 4.89658   | 62.20409   | 3.66795   | 17.92180   | Compromised | Detected | Compromised | Detected    |
| 4426 | A_33_P3301876 |          |           |                                                                                                   |                                                                                                                                                                                                         | 12.14647 | down | 18.89383 | down | 10.75276  | 135.23929  | 3.94679   | 65.75504   | Compromised | Detected | Compromised | Detected    |
| 4427 | A_33_P3237359 | HMG3     | Hs.19114  | high-mobility group box 3                                                                         | Homo sapiens high-mobility group box 3 (HMG3). mRNA [NM_005342]                                                                                                                                         | 12.06067 | down | 12.10703 | down | 126.90768 | 1584.86600 | 85.42881  | 912.02686  | Detected    | Detected | Detected    | Detected    |
| 4428 | A_33_P3258732 |          |           |                                                                                                   |                                                                                                                                                                                                         | 12.03930 | down | 4.20350  | down | 11.33256  | 141.27399  | 2.53226   | 9.38610    | Compromised | Detected | Compromised | Compromised |
| 4429 | A_23_P53390   | PTPRB    | Hs.434375 | protein tyrosine phosphatase, receptor type, B                                                    | Homo sapiens protein tyrosine phosphatase, receptor type, B (PTPRB). transcript variant 2. mRNA [NM_002837]                                                                                             | 11.97032 | down | 12.45743 | down | 2.28560   | 28.32945   | 2.39059   | 26.26020   | Compromised | Detected | Compromised | Detected    |
| 4430 | A_23_P133123  | MND1     | Hs.294088 | meiotic nuclear divisions 1 homolog (S. cerevisiae)                                               | Homo sapiens meiotic nuclear divisions 1 homolog (S. cerevisiae) (MND1). mRNA [NM_032117]                                                                                                               | 11.93079 | down | 12.53796 | down | 190.46000 | 2352.91330 | 132.15727 | 1461.11170 | Detected    | Detected | Detected    | Detected    |
| 4431 | A_33_P3703501 | GALNT10  | Hs.631797 | UDP-N-acetyl-alpha-D-galactosamine:polypeptide N-acetyl-galactosaminyltransferase 10 (GalNAc-T10) | Homo sapiens UDP-N-acetyl-alpha-D-galactosamine:polypeptide N-acetyl-galactosaminyltransferase 10 (GalNAc-T10) (GALNT10). transcript variant 1. mRNA [NM_198321]                                        | 11.86230 | down | 12.02832 | down | 506.98587 | 6227.27150 | 386.07574 | 4094.89550 | Detected    | Detected | Detected    | Detected    |
| 4432 | A_23_P100642  | PNMT     | Hs.1892   | phenylethanolamine N-methyltransferase                                                            | Homo sapiens phenylethanolamine N-methyltransferase (PNMT). mRNA [NM_002896]                                                                                                                            | 11.81436 | down | 15.37287 | down | 6.27595   | 76.77553   | 6.60567   | 89.54417   | Compromised | Detected | Compromised | Detected    |
| 4433 | A_33_P3391290 | C5orf13  | Hs.36053  | chromosome 5 open reading frame 13                                                                | Homo sapiens chromosome 5 open reading frame 13 (C5orf13). transcript variant 11. mRNA [NM_001142483]                                                                                                   | 11.80901 | down | 13.37855 | down | 86.16718  | 1053.63100 | 86.61972  | 1021.85986 | Detected    | Detected | Detected    | Detected    |
| 4434 | A_23_P134484  | CALCR    | Hs.489127 | calcitonin receptor                                                                               | Homo sapiens calcitonin receptor (CALCR). transcript variant 2. mRNA [NM_001742]                                                                                                                        | 11.79050 | down | 5.58634  | down | 2.53666   | 30.96895   | 2.75759   | 13.58384   | Compromised | Detected | Compromised | Compromised |
| 4435 | A_33_P3246920 |          | Hs.656915 |                                                                                                   | CUB and sushi domain-containing protein 2 (CUB and sushi multiple domains protein 2) [Source:UniProtKB/Swiss-Prot;Acc:Q7Z408] [ENST00000338325]                                                         | 11.74381 | down | 9.12060  | down | 16.57642  | 201.57332  | 19.46281  | 156.52893  | Detected    | Detected | Detected    | Detected    |
| 4436 | A_33_P3238148 |          | Hs.417077 |                                                                                                   | Leucine-rich repeat and death domain-containing protein LOC401387 [Source:UniProtKB/Swiss-Prot;Acc:A4D1F6] [ENST00000343318]                                                                            | 11.70176 | down | 1.79525  | down | 3.32305   | 40.26442   | 8.40743   | 13.30925   | Compromised | Detected | Compromised | Compromised |
| 4437 | A_23_P134204  | FAM71F1  | Hs.131098 | family with sequence similarity 71, member F1                                                     | Homo sapiens family with sequence similarity 71, member F1 (FAM71F1). mRNA [NM_032599]                                                                                                                  | 11.69357 | down | 2.86362  | down | 2.65462   | 32.14271   | 9.06420   | 22.88817   | Compromised | Detected | Compromised | Detected    |
| 4438 | A_33_P3254579 | KRTAP1-5 | Hs.534499 | keratin associated protein 1-5                                                                    | Homo sapiens keratin associated protein 1-5 (KRTAP1-5). mRNA [NM_031957]                                                                                                                                | 11.68335 | down | 15.61468 | down | 15.00413  | 181.51439  | 11.67854  | 160.80042  | Detected    | Detected | Compromised | Detected    |
| 4439 | A_24_P80204   | MALL     | Hs.720026 | mal, T-cell differentiation protein-like                                                          | Homo sapiens mal, T-cell differentiation protein-like (MALL). mRNA [NM_005434]                                                                                                                          | 11.61501 | down | 13.03403 | down | 60.29674  | 725.18097  | 64.13989  | 737.17810  | Detected    | Detected | Detected    | Detected    |
| 4440 | A_33_P3245126 |          |           |                                                                                                   | E3 ubiquitin-protein ligase RNF144B (EC 6.3.2.-(RING finger protein 144B)/BR domain-containing protein 2)(p53-inducible RING finger protein) [Source:UniProtKB/Swiss-Prot;Acc:Q7Z419] [ENST00000397236] | 11.60597 | down | 15.72656 | down | 12.30477  | 147.87270  | 10.44218  | 144.80730  | Compromised | Detected | Compromised | Detected    |
| 4441 | A_23_P301942  | NPPC     | Hs.247916 | natriuretic peptide precursor C                                                                   | Homo sapiens natriuretic peptide precursor C (NPPC). mRNA [NM_024409]                                                                                                                                   | 11.58496 | down | 42.84185 | down | 5.65335   | 67.81611   | 2.56138   | 96.76271   | Compromised | Detected | Compromised | Detected    |
| 4442 | A_24_P253780  | DBF4B    | Hs.720187 | DBF4 homolog B (S. cerevisiae)                                                                    | Homo sapiens DBF4 homolog B (S. cerevisiae) (DBF4B). transcript variant 1. mRNA [NM_145663]                                                                                                             | 11.49650 | down | 2.28256  | down | 2.35303   | 28.01084   | 5.01157   | 10.08700   | Compromised | Detected | Compromised | Compromised |
| 4443 | A_33_P3307500 | STRA6    | Hs.24553  | stimulated by retinoic acid gene 6 homolog (mouse)                                                | Homo sapiens stimulated by retinoic acid gene 6 homolog (mouse) (STRA6). transcript variant 5. mRNA [NM_001142620]                                                                                      | 11.48865 | down | 21.69311 | down | 9.30964   | 110.74777  | 4.63203   | 88.60502   | Compromised | Detected | Compromised | Detected    |
| 4444 | A_23_P253524  | CENPE    | Hs.75573  | centromere protein E, 312kDa                                                                      | Homo sapiens centromere protein E, 312kDa (CENPE). mRNA [NM_001813]                                                                                                                                     | 11.47482 | down | 12.78406 | down | 281.99063 | 3350.53000 | 274.09690 | 3089.85570 | Detected    | Detected | Detected    | Detected    |
| 4445 | A_24_P1444784 | HLS1     | Hs.25934  | histone linker H1 domain, spermatid-specific 1                                                    | Homo sapiens histone linker H1 domain, spermatid-specific 1 (HLS1). transcript variant 1. non-coding RNA [NR_024193]                                                                                    | 11.46146 | down | 7.09797  | down | 7.21433   | 85.61871   | 13.07644  | 81.84448   | Compromised | Detected | Compromised | Detected    |
| 4446 | A_33_P3240328 | PITX1    | Hs.84136  | paired-like homeodomain 1                                                                         | Homo sapiens paired-like homeodomain 1 (PITX1). mRNA [NM_002653]                                                                                                                                        | 11.38954 | down | 11.81455 | down | 157.35880 | 1855.79600 | 117.62779 | 1225.44130 | Detected    | Detected | Detected    | Detected    |
| 4447 | A_23_P233303  | EXO1     | Hs.498248 | exonuclease 1                                                                                     | Homo sapiens exonuclease 1 (EXO1). transcript variant 3. mRNA [NM_003686]                                                                                                                               | 11.36499 | down | 10.91687 | down | 58.60251  | 689.63330  | 55.82058  | 537.35110  | Detected    | Detected | Detected    | Detected    |
| 4448 | A_23_P344555  | NEDD9    | Hs.37982  | neural precursor cell expressed, developmentally down-regulated 9                                 | Homo sapiens neural precursor cell expressed, developmentally down-regulated 9 (NEDD9). transcript variant 1. mRNA [NM_006403]                                                                          | 11.33920 | down | 8.07340  | down | 2.43618   | 28.60389   | 2.64807   | 18.85177   | Compromised | Detected | Compromised | Detected    |
| 4449 | A_23_P251132  | SNTG2    | Hs.595069 | syntrophin, gamma 2                                                                               | Homo sapiens syntrophin, gamma 2 (SNTG2). mRNA [NM_018968]                                                                                                                                              | 11.32209 | down | 4.16112  | down | 2.65865   | 31.16880   | 6.89224   | 25.28930   | Compromised | Detected | Compromised | Detected    |
| 4450 | A_24_P216014  | GH2      | Hs.406754 | growth hormone 2                                                                                  | Homo sapiens growth hormone 2 (GH2). transcript variant 3. mRNA [NM_022558]                                                                                                                             | 11.23941 | down | 1.18513  | down | 2.64374   | 30.76777   | 2.85337   | 2.98188    | Compromised | Detected | Compromised | Compromised |
| 4451 | A_23_P65041   | RACGAP1P | Hs.650500 | Rac GTPase activating protein 1 pseudogene                                                        | Homo sapiens Rac GTPase activating protein 1 pseudogene (RACGAP1P). non-coding RNA [NR_026583]                                                                                                          | 11.23082 | down | 10.27700 | down | 26.28015  | 305.61334  | 32.67522  | 296.10828  | Detected    | Detected | Detected    | Detected    |
| 4452 | A_33_P3343250 | GPR1     | Hs.184907 | G protein-coupled receptor 1                                                                      | Homo sapiens G protein-coupled receptor 1 (GPR1). transcript variant 1. mRNA [NM_005279]                                                                                                                | 11.22817 | down | 19.42866 | down | 26.06809  | 303.07584  | 3.05885   | 52.40424   | Detected    | Detected | Compromised | Detected    |

|      |               |              |           |                                                             |                                                                                                                                                                                        |          |      |          |      |            |             |            |             |             |          |             |             |
|------|---------------|--------------|-----------|-------------------------------------------------------------|----------------------------------------------------------------------------------------------------------------------------------------------------------------------------------------|----------|------|----------|------|------------|-------------|------------|-------------|-------------|----------|-------------|-------------|
| 4453 | A_33_P3305250 |              |           |                                                             | 26S proteasome non-ATPase regulatory subunit 5 (26S proteasome subunit 5) [Source:UniProtKB/Swiss-Prot;Acc:Q16401] [ENST00000373920]                                                   | 11.11289 | down | 6.01666  | down | 3.62711    | 41.73700    | 2.91894    | 15.48627    | Compromised | Detected | Compromised | Detected    |
| 4454 | A_33_P3281473 | LOC100131726 | Hs.660862 | HCC-related HCC-C11_v3                                      | Homo sapiens HCC-related HCC-C11_v3 (LOC100131726), non-coding RNA [NR_024479]                                                                                                         | 11.09951 | down | 7.89632  | down | 4.31624    | 49.60691    | 3.58392    | 24.95446    | Compromised | Detected | Compromised | Detected    |
| 4455 | A_23_P135990  | SLCO2A1      | Hs.518270 | solute carrier organic anion transporter family, member 2A1 | Homo sapiens solute carrier organic anion transporter family, member 2A1 (SLCO2A1), mRNA [NM_005630]                                                                                   | 11.09150 | down | 26.54312 | down | 6.36072    | 73.05158    | 2.60263    | 60.91585    | Compromised | Detected | Compromised | Detected    |
| 4456 | A_33_P3407256 | TRIP13       | Hs.436187 | thyroid hormone receptor interactor 13                      | Homo sapiens thyroid hormone receptor interactor 13 (TRIP13), transcript variant 2, mRNA [NM_001169260]                                                                                | 11.08604 | down | 14.87656 | down | 20.27239   | 232.70964   | 18.52462   | 243.00632   | Detected    | Detected | Detected    | Detected    |
| 4457 | A_23_P47704   | UCP2         | Hs.80658  | uncoupling protein 2 (mitochondrial, proton carrier)        | Homo sapiens uncoupling protein 2 (mitochondrial, proton carrier) (UCP2), nuclear gene encoding mitochondrial protein, mRNA [NM_003355]                                                | 11.07938 | down | 16.03194 | down | 2.86493    | 32.86715    | 2.36466    | 33.42870    | Compromised | Detected | Compromised | Detected    |
| 4458 | A_23_P151778  | CMA1         | Hs.135626 | chymase 1, mast cell                                        | Homo sapiens chymase 1, mast cell (CMA1), mRNA [NM_001836]                                                                                                                             | 11.07161 | down | 1.37666  | down | 2.64003    | 30.26581    | 4.74813    | 5.76386     | Compromised | Detected | Compromised | Compromised |
| 4459 | A_23_P218827  | POLQ         | Hs.241517 | polymerase (DNA directed), theta                            | Homo sapiens polymerase (DNA directed), theta (POLQ), mRNA [NM_199420]                                                                                                                 | 10.96682 | down | 14.68360 | down | 55.99027   | 635.80853   | 37.98750   | 491.85690   | Detected    | Detected | Detected    | Detected    |
| 4460 | A_23_P144843  | ESM1         | Hs.129944 | endothelial cell-specific molecule 1                        | Homo sapiens endothelial cell-specific molecule 1 (ESM1), transcript variant 1, mRNA [NM_007036]                                                                                       | 10.84666 | down | 11.05986 | down | 40.72820   | 457.42970   | 25.56133   | 249.28648   | Detected    | Detected | Detected    | Detected    |
| 4461 | A_33_P3238402 |              |           |                                                             |                                                                                                                                                                                        | 10.81443 | down | 2.44369  | down | 2.50390    | 28.03848    | 5.19282    | 11.18963    | Compromised | Detected | Compromised | Compromised |
| 4462 | A_23_P404494  | IL7R         | Hs.591742 | interleukin 7 receptor                                      | Homo sapiens interleukin 7 receptor (IL7R), mRNA [NM_002185]                                                                                                                           | 10.80711 | down | 14.07378 | down | 85.23578   | 953.81573   | 54.39650   | 675.06730   | Detected    | Detected | Detected    | Detected    |
| 4463 | A_33_P3230548 | KIF14        | Hs.3104   | kinesin family member 14                                    | Homo sapiens kinesin family member 14 (KIF14), mRNA [NM_014875]                                                                                                                        | 10.70198 | down | 9.47822  | down | 107.26451  | 1188.64820  | 61.23342   | 511.77700   | Detected    | Detected | Detected    | Detected    |
| 4464 | A_33_P3242952 | FAM72A       | Hs.661924 | family with sequence similarity 72, member A                | Homo sapiens family with sequence similarity 72, member A (FAM72A), mRNA [NM_001123168]                                                                                                | 10.69799 | down | 11.32691 | down | 26.63227   | 295.01456   | 30.12515   | 300.88900   | Detected    | Detected | Detected    | Detected    |
| 4465 | A_23_P167983  | HIST1H2AC    | Hs.622290 | histone cluster 1, H2ac                                     | Histone H2A type 1-C (H2A/1) [Source:UniProtKB/Swiss-Prot;Acc:Q93077] [ENST00000314088]                                                                                                | 10.69018 | down | 9.89314  | down | 50.72849   | 561.52606   | 48.93801   | 426.91962   | Detected    | Detected | Detected    | Detected    |
| 4466 | A_33_P328883  | HGC6.3       | Hs.448059 | similar to HGC6.3                                           | Homo sapiens similar to HGC6.3 (HGC6.3), mRNA [NM_001129895]                                                                                                                           | 10.67553 | down | 3.53705  | down | 2.78951    | 30.61433    | 3.37365    | 10.52219    | Compromised | Detected | Compromised | Compromised |
| 4467 | A_23_P64611   | P2RY6        | Hs.16362  | pyrimidinergic receptor P2Y, G-protein coupled, 6           | Homo sapiens pyrimidinergic receptor P2Y, G-protein coupled, 6 (P2RY6), transcript variant 2, mRNA [NM_176798]                                                                         | 10.65945 | down | 18.75149 | down | 4.36511    | 48.17956    | 3.08048    | 50.93531    | Compromised | Detected | Compromised | Detected    |
| 4468 | A_23_P64161   | ANGPTL5      | Hs.318370 | angiotensin-like 5                                          | Homo sapiens angiotensin-like 5 (ANGPTL5), mRNA [NM_178127]                                                                                                                            | 10.62894 | down | 1.93604  | down | 2.84595    | 31.31619    | 12.18018   | 20.79379    | Compromised | Detected | Compromised | Detected    |
| 4469 | A_33_P3402020 | CDC8         | Hs.97876  | coiled-coil domain containing 8                             | Homo sapiens coiled-coil domain containing 8 (CDC8), mRNA [NM_032040]                                                                                                                  | 10.50293 | down | 18.44732 | down | 185.33307  | 2015.56400  | 97.20642   | 1581.22530  | Detected    | Detected | Detected    | Detected    |
| 4470 | A_23_P164958  | CDC8         | Hs.97876  | coiled-coil domain containing 8                             | Homo sapiens coiled-coil domain containing 8 (CDC8), mRNA [NM_032040]                                                                                                                  | 10.47582 | down | 11.63966 | down | 242.36613  | 2629.01510  | 243.71422  | 2500.55980  | Detected    | Detected | Detected    | Detected    |
| 4471 | A_23_P10385   | DTL          | Hs.656473 | denticleless homolog (Drosophila)                           | Homo sapiens denticleless homolog (Drosophila) (DTL), mRNA [NM_016448]                                                                                                                 | 10.43840 | down | 10.11828 | down | 81.02996   | 875.81525   | 61.50004   | 548.71590   | Detected    | Detected | Detected    | Detected    |
| 4472 | A_24_P125871  | RIPK4        | Hs.517310 | receptor-interacting serine-threonine kinase 4              | Homo sapiens receptor-interacting serine-threonine kinase 4 (RIPK4), mRNA [NM_020639]                                                                                                  | 10.39177 | down | 12.50697 | down | 19.48539   | 209.66777   | 13.19240   | 145.49270   | Detected    | Detected | Detected    | Detected    |
| 4473 | A_23_P129717  | ERI2         | Hs.248437 | ERI1 exoribonuclease family member 2                        | Homo sapiens ERI1 exoribonuclease family member 2 (ERI2), transcript variant 2, mRNA [NM_080663]                                                                                       | 10.38247 | down | 3.95443  | down | 2.31402    | 24.87717    | 5.17494    | 18.04489    | Compromised | Detected | Compromised | Detected    |
| 4474 | A_32_P211117  | LOC401021    | Hs.591636 | hypothetical gene supported by BC047605                     | Homo sapiens hypothetical gene supported by BC047605, mRNA (cDNA clone IMAGE:5589309) [BC047605]                                                                                       | 10.28565 | down | 2.62148  | down | 3.46688    | 36.92355    | 9.09632    | 21.02701    | Detected    | Detected | Compromised | Detected    |
| 4475 | A_33_P3227079 |              |           |                                                             | Probable lipid phosphate phosphatase PPAPDC3 (EC 3.1.3.-)(Phosphatidic acid phosphatase type 2 domain-containing protein 3) [Source:UniProtKB/Swiss-Prot;Acc:Q8NBV4] [ENST00000372261] | 10.19616 | down | 10.35941 | down | 69.67550   | 735.61410   | 60.30766   | 550.90050   | Detected    | Detected | Detected    | Detected    |
| 4476 | A_33_P3406939 | KIF24        | Hs.710246 | kinesin family member 24                                    | Homo sapiens kinesin family member 24 (KIF24), mRNA [NM_194313]                                                                                                                        | 10.19193 | down | 22.72142 | down | 25.42756   | 268.34540   | 5.73247    | 114.85307   | Detected    | Detected | Compromised | Detected    |
| 4477 | A_33_P3339212 | TRIP13       | Hs.436187 | thyroid hormone receptor interactor 13                      | Homo sapiens thyroid hormone receptor interactor 13 (TRIP13), transcript variant 1, mRNA [NM_004237]                                                                                   | 10.13593 | down | 9.26729  | down | 831.93880  | 8731.48000  | 747.15424  | 6105.59960  | Detected    | Detected | Detected    | Detected    |
| 4478 | A_33_P3846653 |              | Hs.527883 |                                                             | Keratin 19 Fragment [Source:UniProtKB/TrEMBL;Acc:A044R5] [ENST00000405395]                                                                                                             | 10.12079 | down | 7.44318  | down | 11.36448   | 119.09602   | 22.22349   | 145.86003   | Compromised | Detected | Detected    | Detected    |
| 4479 | A_23_P88740   | CENPN        | Hs.55028  | centromere protein N                                        | Homo sapiens centromere protein N (CENPN), transcript variant 3, mRNA [NM_018455]                                                                                                      | 10.11463 | down | 9.65239  | down | 1710.36830 | 17913.17800 | 1506.79080 | 12824.87400 | Detected    | Detected | Detected    | Detected    |
| 4480 | A_33_P3304678 | RP5-1022P6.6 | Hs.123609 | hypothetical LOC149837                                      | Homo sapiens hypothetical LOC149837 (LOC149837), non-coding RNA [NR_015406]                                                                                                            | 10.09316 | down | 3.17443  | down | 2.82983    | 29.57470    | 2.94014    | 8.22998     | Compromised | Detected | Compromised | Compromised |
| 4481 | A_33_P3441639 | LOC145694    | Hs.147229 | hypothetical protein LOC145694                              | Homo sapiens cDNA FLJ32231 fis, clone PLACE600491 [AK056793]                                                                                                                           | 10.07201 | down | 8.69945  | down | 96.26368   | 1003.94870  | 101.53353  | 778.87370   | Detected    | Detected | Detected    | Detected    |
| 4482 | A_24_P142118  | THBS1        | Hs.164226 | thrombospondin 1                                            | Homo sapiens thrombospondin 1 (THBS1), mRNA [NM_003246]                                                                                                                                | 10.06739 | down | 11.21227 | down | 8381.52000 | 87372.07000 | 6690.92400 | 66152.31000 | Detected    | Detected | Detected    | Detected    |

|      |               |              |           |                                                               |                                                                                                                                                              |          |      |          |      |             |              |             |             |             |              |             |              |
|------|---------------|--------------|-----------|---------------------------------------------------------------|--------------------------------------------------------------------------------------------------------------------------------------------------------------|----------|------|----------|------|-------------|--------------|-------------|-------------|-------------|--------------|-------------|--------------|
| 4483 | A_23.P149121  | DIRAS3       | Hs.194695 | DIRAS family, GTP-binding RAS-like 3                          | Homo sapiens DIRAS family, GTP-binding RAS-like 3 (DIRAS3), mRNA [NM_004675]                                                                                 | 10.04228 | down | 9.90943  | down | 62.51156    | 650.01830    | 54.66158    | 477.63540   | Detected    | Detected     | Detected    | Detected     |
| 4484 | A_33.P3321293 | IQGAP3       | Hs.591495 | IQ motif containing GTPase activating protein 3               | Homo sapiens IQ motif containing GTPase activating protein 3 (IQGAP3), mRNA [NM_178229]                                                                      | 10.03782 | down | 19.00375 | down | 199.99000   | 2078.64700   | 102.83913   | 1723.30940  | Detected    | Detected     | Detected    | Detected     |
| 4485 | A_33.P3415113 | CLCN6        | Hs.193043 | chloride channel 6                                            | Homo sapiens chloride channel 6 (CLCN6), transcript variant CIC-6b, mRNA [NM_021735]                                                                         | 10.02584 | down | 14.87768 | down | 15.92252    | 165.29736    | 13.10214    | 171.88696   | Detected    | Detected     | Compromised | Detected     |
| 4486 | A_23.P14083   | AMIGO2       | Hs.121520 | adhesion molecule with Ig-like domain 2                       | Homo sapiens adhesion molecule with Ig-like domain 2 (AMIGO2), transcript variant 2, mRNA [NM_181847]                                                        | 10.01934 | down | 9.88929  | down | 126.29672   | 1310.28090   | 76.09612    | 663.57996   | Detected    | Detected     | Detected    | Detected     |
| 4487 | A_32.P183218  | ZNF367       | Hs.494557 | zinc finger protein 367                                       | Homo sapiens zinc finger protein 367 (ZNF367), mRNA [NM_153695]                                                                                              | 10.00583 | down | 4.12613  | down | 14.49104    | 150.13632    | 10.17996    | 37.03856    | Detected    | Detected     | Compromised | Detected     |
| 4488 | A_23.P100344  | ORC6L        | Hs.49760  | origin recognition complex, subunit 6 like (yeast)            | Homo sapiens origin recognition complex, subunit 6 like (yeast) (ORC6L), mRNA [NM_014321]                                                                    | 9.98807  | down | 10.55351 | down | 193.56079   | 2001.85140   | 157.03879   | 1461.40050  | Detected    | Detected     | Detected    | Detected     |
| 4489 | A_23.P134663  | BAALC        | Hs.533446 | brain and acute leukemia, cytoplasmic                         | Homo sapiens brain and acute leukemia, cytoplasmic (BAALC), transcript variant 1, mRNA [NM_024812]                                                           | 9.98213  | down | 9.94870  | down | 581.92426   | 6014.82100   | 391.14270   | 3431.36500  | Detected    | Detected     | Detected    | Detected     |
| 4490 | A_32.P471485  |              | Hs.58559  |                                                               | Rhotekin-2 (Pleckstrin homology domain-containing family K member 1) [Source:UniProtKB/SwissProt;Acc:Q8IZC4] [ENST00000395260]                               | 9.82234  | down | 8.06567  | down | 2.49951     | 25.42164     | 2.73433     | 19.44717    | Compromised | Detected     | Compromised | Detected     |
| 4491 | A_24.P161764  |              | Hs.721648 |                                                               | Putative uncharacterized protein ENSP00000375004 [Source:UniProtKB/TrEMBL;Acc:A6NMP9] [ENST00000390595]                                                      | 9.74913  | down | 1.80463  | down | 3.99826     | 40.36176     | 2.69015     | 4.28084     | Compromised | Detected     | Compromised | Compromised  |
| 4492 | A_24.P462899  | C6orf173     | Hs.486401 | chromosome 6 open reading frame 173                           | Homo sapiens chromosome 6 open reading frame 173 (C6orf173), mRNA [NM_001012507]                                                                             | 9.74304  | down | 8.55238  | down | 1272.43850  | 12837.02000  | 753.98627   | 5686.11870  | Detected    | Detected     | Detected    | Detected     |
| 4493 | A_24.P3045    | CASP10       | Hs.5353   | caspase 10, apoptosis-related cysteine peptidase              | Homo sapiens caspase 10, apoptosis-related cysteine peptidase (CASP10), transcript variant B, mRNA [NM_032974]                                               | 9.71254  | down | 5.39291  | down | 4.19933     | 42.23246     | 6.22266     | 29.59131    | Compromised | Detected     | Compromised | Detected     |
| 4494 | A_23.P144959  | VCAN         | Hs.643801 | versican                                                      | Homo sapiens versican (VCAN), transcript variant 1, mRNA [NM_004385]                                                                                         | 9.70815  | down | 9.85742  | down | 700.70450   | 7043.75630   | 529.03290   | 4598.45070  | Detected    | Detected     | Detected    | Detected     |
| 4495 | A_23.P114862  | ANGPTL7      | Hs.146559 | angiotensin-like 7                                            | Homo sapiens angiotensin-like 7 (ANGPTL7), mRNA [NM_021146]                                                                                                  | 9.68819  | down | 7.22973  | down | 2.51769     | 25.25676     | 2.79030     | 17.78848    | Compromised | Not Detected | Compromised | Not Detected |
| 4496 | A_23.P258493  | LMNB1        | Hs.89497  | lamin B1                                                      | Homo sapiens lamin B1 (LMNB1), mRNA [NM_005573]                                                                                                              | 9.66296  | down | 15.88211 | down | 33.51647    | 335.35280    | 77.72552    | 1088.52200  | Detected    | Detected     | Detected    | Detected     |
| 4497 | A_33.P3300253 | PTPN20B      | Hs.499552 | protein tyrosine phosphatase, non-receptor type 20B           | Homo sapiens protein tyrosine phosphatase, non-receptor type 20B (PTPN20B), transcript variant 1, mRNA [NM_001042357]                                        | 9.66049  | down | 7.08076  | down | 3.86584     | 38.67013     | 4.44801     | 27.77223    | Compromised | Detected     | Compromised | Detected     |
| 4498 | A_32.P192970  | ALDH4A1      | Hs.77448  | aldehyde dehydrogenase 4 family, member A1                    | Homo sapiens aldehyde dehydrogenase 4 family, member A1 (ALDH4A1), nuclear gene encoding mitochondrial protein, transcript variant P5CDHS, mRNA [NM_1170726] | 9.47329  | down | 14.46507 | down | 33.76122    | 331.17096    | 28.35141    | 361.62680   | Detected    | Detected     | Detected    | Detected     |
| 4499 | A_24.P270033  | MPZL3        | Hs.15396  | myelin protein zero-like 3                                    | Myelin protein zero-like protein 3 Precursor [Source:UniProtKB/SwissProt;Acc:Q6UWV2] [ENST00000278949]                                                       | 9.45431  | down | 9.79506  | down | 3.56797     | 34.92887     | 2.78325     | 24.03949    | Compromised | Detected     | Compromised | Detected     |
| 4500 | A_33.P3343516 | LOC100129617 | Hs.657151 | hypothetical protein LOC100129617                             | Homo sapiens cDNA FLJ41543 fis, clone CERVX200206. [AK123537]                                                                                                | 9.44973  | down | 4.13638  | down | 2.37330     | 23.22229     | 3.09636     | 11.29372    | Compromised | Detected     | Compromised | Compromised  |
| 4501 | A_33.P3260634 | PLCB4        | Hs.472101 | phospholipase C, beta 4                                       | Homo sapiens phospholipase C, beta 4 (PLCB4), transcript variant 1, mRNA [NM_000933]                                                                         | 9.38440  | down | 6.74455  | down | 40.01251    | 388.80792    | 39.97358    | 237.73419   | Detected    | Detected     | Detected    | Detected     |
| 4502 | A_23.P167468  | PRLR         | Hs.368587 | prolactin receptor                                            | Homo sapiens prolactin receptor (PRLR), mRNA [NM_000949]                                                                                                     | 9.34921  | down | 6.51474  | down | 3.64043     | 35.24203     | 3.68999     | 21.19769    | Compromised | Detected     | Compromised | Detected     |
| 4503 | A_23.P206022  | ITGA11       | Hs.436416 | integrin, alpha 11                                            | Homo sapiens integrin, alpha 11 (ITGA11), mRNA [NM_001004439]                                                                                                | 9.32716  | down | 9.91764  | down | 261.34277   | 2524.02220   | 275.41202   | 2408.55570  | Detected    | Detected     | Detected    | Detected     |
| 4504 | A_23.P156218  | GZMK         | Hs.277937 | granzyme K (granzyme 3, tryptase II)                          | Homo sapiens granzyme K (granzyme 3, tryptase II) (GZMK), mRNA [NM_002104]                                                                                   | 9.30199  | down | 11.66739 | down | 5.09379     | 49.06254     | 4.55026     | 46.81402    | Compromised | Detected     | Compromised | Detected     |
| 4505 | A_23.P323243  | PNLDC1       | Hs.349077 | poly(A)-specific ribonuclease (PARN)-like domain containing 1 | Homo sapiens poly(A)-specific ribonuclease (PARN)-like domain containing 1 (PNLDC1), mRNA [NM_173516]                                                        | 9.30197  | down | 9.96252  | down | 2.64226     | 25.44977     | 2.88457     | 25.34057    | Compromised | Detected     | Compromised | Detected     |
| 4506 | A_33.P3325135 | ZSCAN23      | Hs.721841 | zinc finger and SCAN domain containing 23                     | Homo sapiens zinc finger and SCAN domain containing 23 (ZSCAN23), mRNA [NM_001012455]                                                                        | 9.20065  | down | 1.18399  | down | 2.50484     | 23.86334     | 2.83106     | 2.95572     | Compromised | Detected     | Compromised | Compromised  |
| 4507 | A_33.P3387861 | CENPN        | Hs.55028  | centromere protein N                                          | Homo sapiens centromere protein N (CENPN), transcript variant 2, mRNA [NM_001100624]                                                                         | 9.18503  | down | 10.22693 | down | 319.12270   | 3035.08890   | 254.22676   | 2292.62040  | Detected    | Detected     | Detected    | Detected     |
| 4508 | A_33.P3405911 | TSIX         |           | XIST antisense RNA (non-protein coding)                       | Homo sapiens XIST antisense RNA (non-protein coding) (TSIX), antisense RNA [NR_003255]                                                                       | 9.17552  | down | 4.59666  | down | 2.36100     | 22.43155     | 4.24215     | 17.19468    | Compromised | Detected     | Compromised | Detected     |
| 4509 | A_23.P66798   | KRT19        | Hs.654568 | keratin 19                                                    | Homo sapiens keratin 19 (KRT19), mRNA [NM_002276]                                                                                                            | 9.13790  | down | 11.51091 | down | 350.54920   | 3316.86900   | 264.09137   | 2680.58350  | Detected    | Detected     | Detected    | Detected     |
| 4510 | A_33.P3716128 | SMC4         | Hs.58892  | structural maintenance of chromosomes 4                       | Homo sapiens structural maintenance of chromosomes 4 (SMC4), transcript variant 1, mRNA [NM_005496]                                                          | 9.11372  | down | 8.50121  | down | 948.89920   | 8954.65200   | 640.11720   | 4798.50000  | Detected    | Detected     | Detected    | Detected     |
| 4511 | A_23.P321501  | DHRS2        | Hs.272499 | dehydrogenase/reductase (SDR family) member 2                 | Homo sapiens dehydrogenase/reductase (SDR family) member 2 (DHRS2), transcript variant 1, mRNA [NM_182908]                                                   | 9.10002  | down | 17.90205 | down | 65.39507    | 616.19836    | 33.44551    | 527.96630   | Detected    | Detected     | Detected    | Detected     |
| 4512 | A_33.P3304668 | COL1A1       | Hs.172928 | collagen, type I, alpha 1                                     | Homo sapiens collagen, type I, alpha 1 (COL1A1), mRNA [NM_000088]                                                                                            | 9.08634  | down | 8.83507  | down | 12927.84900 | 121632.08000 | 10123.93750 | 78872.40000 | Detected    | Detected     | Detected    | Detected     |

|      |               |              |           |                                                                                                                   |                                                                                                                                            |         |      |          |      |            |             |            |             |             |              |             |             |
|------|---------------|--------------|-----------|-------------------------------------------------------------------------------------------------------------------|--------------------------------------------------------------------------------------------------------------------------------------------|---------|------|----------|------|------------|-------------|------------|-------------|-------------|--------------|-------------|-------------|
| 4513 | A_33_P3415820 | THBS1        | Hs.164226 | thrombospondin 1                                                                                                  | Homo sapiens thrombospondin 1 (THBS1), mRNA [NM_003246]                                                                                    | 9.08103 | down | 10.36795 | down | 415.86053  | 3910.35400  | 451.28854  | 4125.84330  | Detected    | Detected     | Detected    | Detected    |
| 4514 | A_23_P143190  | MYBL2        | Hs.179718 | v-myb myeloblastosis viral oncogene homolog (avian)-like 2                                                        | Homo sapiens v-myb myeloblastosis viral oncogene homolog (avian)-like 2 (MYBL2), mRNA [NM_002466]                                          | 9.08085 | down | 25.78563 | down | 247.45096  | 2326.74340  | 103.16248  | 2345.65940  | Detected    | Detected     | Detected    | Detected    |
| 4515 | A_23_P121851  | PCDH15       | Hs.130757 | protocadherin beta 15                                                                                             | Homo sapiens protocadherin beta 15 (PCDH15), mRNA [NM_018935]                                                                              | 9.03279 | down | 1.22671  | down | 3.14201    | 29.38744    | 2.94792    | 3.18877     | Compromised | Not Detected | Compromised | Compromised |
| 4516 | A_23_P162355  | HOXC5        | Hs.549040 | homeobox C5                                                                                                       | Homo sapiens homeobox C5 (HOXC5), transcript variant 1, mRNA [NM_018953]                                                                   | 9.02139 | down | 7.62677  | down | 3.13995    | 29.33120    | 7.18272    | 48.30531    | Compromised | Detected     | Compromised | Detected    |
| 4517 | A_23_P131263  | MPP4         | Hs.63085  | membrane protein, palmitoylated 4 (MAGUK p55 subfamily member 4) (MPP4), mRNA                                     | Homo sapiens membrane protein, palmitoylated 4 (MAGUK p55 subfamily member 4) (MPP4), mRNA [NM_033066]                                     | 9.01646 | down | 8.18834  | down | 44.18587   | 412.52707   | 19.90693   | 143.73611   | Detected    | Detected     | Detected    | Detected    |
| 4518 | A_33_P3284345 | NRG1         | Hs.453951 | neuregulin 1                                                                                                      | Homo sapiens neuregulin 1 (NRG1), transcript variant HRG-gamma, mRNA [NM_004495]                                                           | 8.97735 | down | 12.96108 | down | 32.91935   | 306.00793   | 20.54904   | 234.85416   | Detected    | Detected     | Detected    | Detected    |
| 4519 | A_24_P52697   | H19          | Hs.533566 | H19, imprinted maternally expressed transcript (non-protein coding)                                               | Homo sapiens H19, imprinted maternally expressed transcript (non-protein coding) (H19), non-coding RNA [NR_002196]                         | 8.97703 | down | 46.75808 | down | 9.89783    | 92.00195    | 3.18234    | 131.21063   | Compromised | Detected     | Compromised | Detected    |
| 4520 | A_24_P384029  | LOC100130171 | Hs.711916 | similar to hematological and neurological expressed 1                                                             | PREDICTED: Homo sapiens similar to hematological and neurological expressed 1 (LOC100130171), miscRNA [XR_038676]                          | 8.95315 | down | 14.47509 | down | 131.62102  | 1220.20810  | 4.81989    | 61.52112    | Detected    | Detected     | Compromised | Detected    |
| 4521 | A_24_P214231  | STIL         | Hs.525198 | SCL/TAL1 interrupting locus                                                                                       | Homo sapiens SCL/TAL1 interrupting locus (STIL), transcript variant 1, mRNA [NM_001048166]                                                 | 8.88299 | down | 8.61571  | down | 21.11260   | 194.19313   | 15.16749   | 115.23121   | Detected    | Detected     | Detected    | Detected    |
| 4522 | A_23_P137896  | OXCT2        | Hs.472491 | 3-oxoacid CoA transferase 2                                                                                       | Homo sapiens 3-oxoacid CoA transferase 2 (OXCT2), mRNA [NM_021120]                                                                         | 8.84161 | down | 11.69220 | down | 27.28027   | 249.75443   | 19.70523   | 203.16226   | Detected    | Detected     | Detected    | Detected    |
| 4523 | A_32_P186474  | RACGAP1      | Hs.505469 | Rac GTPase activating protein 1                                                                                   | Homo sapiens Rac GTPase activating protein 1 (RACGAP1), transcript variant 1, mRNA [NM_013277]                                             | 8.83306 | down | 7.72397  | down | 1142.04660 | 10445.47700 | 657.50240  | 4478.19970  | Detected    | Detected     | Detected    | Detected    |
| 4524 | A_33_P3364268 | LBH          | Hs.567598 | limb bud and heart development homolog (mouse)                                                                    | Homo sapiens limb bud and heart development homolog (mouse) (LBH), mRNA [NM_030915]                                                        | 8.80822 | down | 7.77108  | down | 77.30021   | 705.02090   | 80.12980   | 549.08673   | Detected    | Detected     | Detected    | Detected    |
| 4525 | A_23_P80032   | E2F1         | Hs.654393 | E2F transcription factor 1                                                                                        | Homo sapiens E2F transcription factor 1 (E2F1), mRNA [NM_005225]                                                                           | 8.76888 | down | 9.66277  | down | 512.26470  | 4651.27250  | 357.43234  | 3045.51730  | Detected    | Detected     | Detected    | Detected    |
| 4526 | A_24_P941557  | FAM125B      | Hs.182659 | family with sequence similarity 125, member B                                                                     | Homo sapiens family with sequence similarity 125, member B (FAM125B), transcript variant 2, mRNA [NM_001011703]                            | 8.75185 | down | 15.73737 | down | 14.19450   | 128.63310   | 4.88828    | 67.83497    | Detected    | Detected     | Compromised | Detected    |
| 4527 | A_24_P392110  | PSG8         | Hs.466843 | pregnancy specific beta-1-glycoprotein 8                                                                          | Homo sapiens pregnancy specific beta-1-glycoprotein 8 (PSG8), transcript variant 1, mRNA [NM_182707]                                       | 8.64318 | down | 9.10011  | down | 878.92096  | 7866.04900  | 927.49270  | 7442.56250  | Detected    | Detected     | Detected    | Detected    |
| 4528 | A_33_P3325748 | TRIOBP       | Hs.533030 | TRIO and F-actin binding protein                                                                                  | Homo sapiens TRIO and F-actin binding protein (TRIOBP), transcript variant 2, mRNA [NM_138632]                                             | 8.59614 | down | 1.17828  | down | 15.41921   | 137.24573   | 2.35087    | 2.44254     | Detected    | Detected     | Compromised | Compromised |
| 4529 | A_33_P3401658 | PSG2         | Hs.709200 | pregnancy specific beta-1-glycoprotein 2                                                                          | Homo sapiens pregnancy specific beta-1-glycoprotein 2 (PSG2), mRNA [NM_031246]                                                             | 8.54694 | down | 8.89981  | down | 334.67140  | 2961.84400  | 332.64578  | 2610.52690  | Detected    | Detected     | Detected    | Detected    |
| 4530 | A_33_P3867534 | MCM10        | Hs.198363 | minichromosome maintenance complex component 10                                                                   | Homo sapiens minichromosome maintenance complex component 10 (MCM10), transcript variant 1, mRNA [NM_182751]                               | 8.54474 | down | 17.74148 | down | 15.28417   | 135.23026   | 5.39638    | 84.42250    | Detected    | Detected     | Compromised | Detected    |
| 4531 | A_33_P3226761 | SOX18        | Hs.8619   | SRY (sex determining region Y)-box 18                                                                             | Homo sapiens SRY (sex determining region Y)-box 18 (SOX18), mRNA [NM_018419]                                                               | 8.51783 | down | 1.38258  | down | 2.50588    | 22.10151    | 3.48455    | 4.24819     | Compromised | Detected     | Compromised | Compromised |
| 4532 | A_23_P94422   | MELK         | Hs.184339 | maternal embryonic leucine zipper kinase                                                                          | Homo sapiens maternal embryonic leucine zipper kinase (MELK), mRNA [NM_014791]                                                             | 8.51146 | down | 8.09946  | down | 675.75670  | 5955.62900  | 609.38257  | 4352.22600  | Detected    | Detected     | Detected    | Detected    |
| 4533 | A_33_P3415944 | C6orf191     | Hs.448372 | chromosome 6 open reading frame 191                                                                               | Homo sapiens chromosome 6 open reading frame 191 (C6orf191), mRNA [NM_001010876]                                                           | 8.50365 | down | 6.42186  | down | 14.55207   | 128.13364   | 15.25652   | 86.39359    | Detected    | Detected     | Detected    | Detected    |
| 4534 | A_33_P3340802 |              |           |                                                                                                                   | Dehydrodolichyl diphosphate synthase (Dedol-PP synthase)(EC 2.5.1.-) [Source:UniProtKB/Swiss-Prot;Acc:Q86SQ9] [ENST00000374186]            | 8.47346 | down | 3.75723  | down | 4.05853    | 35.60921    | 3.43037    | 11.36511    | Compromised | Detected     | Compromised | Compromised |
| 4535 | A_23_P420326  | FND5         | Hs.524234 | fibronectin type III domain containing 5                                                                          | Homo sapiens fibronectin type III domain containing 5 (FND5), mRNA [NM_153756]                                                             | 8.43319 | down | 9.37426  | down | 3.62574    | 31.66074    | 3.32071    | 27.44941    | Compromised | Detected     | Compromised | Detected    |
| 4536 | A_23_P415652  | GALNT12      | Hs.47099  | UDP-N-acetyl-alpha-D-galactosamine:polypeptide N-acetyl-galactosaminyltransferase 12 (GalNAc-T12) (GALNT12), mRNA | Homo sapiens UDP-N-acetyl-alpha-D-galactosamine:polypeptide N-acetyl-galactosaminyltransferase 12 (GalNAc-T12) (GALNT12), mRNA [NM_024642] | 8.42560 | down | 1.70417  | down | 6.50325    | 56.73674    | 10.13794   | 15.23454    | Compromised | Detected     | Compromised | Detected    |
| 4537 | A_23_P68167   | CNGA3        | Hs.234785 | cyclic nucleotide gated channel alpha 3                                                                           | Homo sapiens cyclic nucleotide gated channel alpha 3 (CNGA3), transcript variant 1, mRNA [NM_001298]                                       | 8.38726 | down | 8.92531  | down | 20.07795   | 174.37025   | 12.73791   | 100.25060   | Detected    | Detected     | Compromised | Detected    |
| 4538 | A_23_P99292   | RAD51AP1     | Hs.504550 | RAD51 associated protein 1                                                                                        | Homo sapiens RAD51 associated protein 1 (RAD51AP1), transcript variant 2, mRNA [NM_006479]                                                 | 8.37820 | down | 9.61286  | down | 124.78508  | 1082.54600  | 114.96819  | 974.53090   | Detected    | Detected     | Detected    | Detected    |
| 4539 | A_24_P321581  | SLC38A4      | Hs.446077 | solute carrier family 38, member 4                                                                                | Homo sapiens solute carrier family 38, member 4 (SLC38A4), transcript variant 1, mRNA [NM_018018]                                          | 8.30192 | down | 4.32031  | down | 4.39538    | 37.78403    | 8.88294    | 33.84057    | Compromised | Detected     | Compromised | Detected    |
| 4540 | A_32_P202013  | FAM196A      | Hs.613882 | family with sequence similarity 196, member A                                                                     | Homo sapiens family with sequence similarity 196, member A (FAM196A), mRNA [NM_001039762]                                                  | 8.28199 | down | 4.47706  | down | 11.49315   | 98.56135    | 15.96267   | 63.01792    | Compromised | Detected     | Detected    | Detected    |
| 4541 | A_32_P116556  | ZNF469       | Hs.54925  | zinc finger protein 469                                                                                           | Homo sapiens zinc finger protein 469 (ZNF469), mRNA [NM_001127464]                                                                         | 8.24956 | down | 8.33534  | down | 2682.95020 | 22917.97500 | 1912.84790 | 14059.48200 | Detected    | Detected     | Detected    | Detected    |



|      |               |           |           |                                                             |                                                                                                             |         |      |          |      |             |              |             |             |             |          |             |             |
|------|---------------|-----------|-----------|-------------------------------------------------------------|-------------------------------------------------------------------------------------------------------------|---------|------|----------|------|-------------|--------------|-------------|-------------|-------------|----------|-------------|-------------|
| 4542 | A_33_P3709173 | PHTF2     | Hs.203965 | putative homeodomain transcription factor 2                 | Homo sapiens putative homeodomain transcription factor 2 (PHTF2), transcript variant 5, mRNA [NM_001127380] | 8.24325 | down | 4.98901  | down | 2.30800     | 19.70004     | 2.45491     | 10.79979    | Compromised | Detected | Compromised | Compromised |
| 4543 | A_33_P3298216 | MYO16     | Hs.656587 | myosin XVI                                                  | Homo sapiens myosin XVI (MYO16), mRNA [NM_015011]                                                           | 8.23686 | down | 8.17679  | down | 31.71510    | 270.49610    | 26.65287    | 192.17305   | Detected    | Detected | Detected    | Detected    |
| 4544 | A_23_P57413   | PPM1F     | Hs.112728 | protein phosphatase 1F (PP2C domain containing)             | Homo sapiens protein phosphatase 1F (PP2C domain containing) (PPM1F), mRNA [NM_014634]                      | 8.23210 | down | 11.92993 | down | 55.52918    | 473.33124    | 46.82087    | 492.54144   | Detected    | Detected | Detected    | Detected    |
| 4545 | A_24_P65098   | TMEM87A   | Hs.597178 | transmembrane protein 87A                                   | Homo sapiens transmembrane protein 87A (TMEM87A), transcript variant 2, mRNA [NM_001110503]                 | 8.21011 | down | 3.15181  | down | 11.75098    | 99.89788     | 19.55616    | 54.35128    | Compromised | Detected | Detected    | Detected    |
| 4546 | A_33_P3388771 | LOC732272 | Hs.572567 | hypothetical LOC732272                                      | PREDICTED: Homo sapiens hypothetical LOC732272 (LOC732272), miscRNA [XR_038448]                             | 8.20544 | down | 5.16078  | down | 13.11345    | 111.41719    | 13.12062    | 59.70837    | Detected    | Detected | Detected    | Detected    |
| 4547 | A_23_P100240  | CDH16     | Hs.513660 | cadherin 16, KSP-cadherin                                   | Homo sapiens cadherin 16, KSP-cadherin (CDH16), mRNA [NM_004062]                                            | 8.20263 | down | 25.91708 | down | 6.51760     | 55.35724     | 2.44651     | 55.91123    | Compromised | Detected | Compromised | Detected    |
| 4548 | A_23_P374082  | ADAM19    | Hs.483944 | ADAM metalloproteinase domain 19 (meltrin beta)             | Homo sapiens ADAM metalloproteinase domain 19 (meltrin beta) (ADAM19), mRNA [NM_033274]                     | 8.18717 | down | 8.91159  | down | 721.83026   | 6119.30500   | 622.56006   | 4892.17700  | Detected    | Detected | Detected    | Detected    |
| 4549 | A_23_P117437  | IL25      | Hs.302036 | interleukin 25                                              | Homo sapiens interleukin 25 (IL25), transcript variant 1, mRNA [NM_022789]                                  | 8.18346 | down | 1.18456  | down | 2.70902     | 22.95530     | 2.86861     | 2.99638     | Compromised | Detected | Compromised | Compromised |
| 4550 | A_23_P125717  | NAP1L3    | Hs.21365  | nucleosome assembly protein 1-like 3                        | Homo sapiens nucleosome assembly protein 1-like 3 (NAP1L3), mRNA [NM_004538]                                | 8.17685 | down | 7.17852  | down | 6.91225     | 58.52456     | 4.83686     | 30.61713    | Compromised | Detected | Compromised | Detected    |
| 4551 | A_23_P429491  | C11orf82  | Hs.165607 | chromosome 11 open reading frame 82                         | Homo sapiens chromosome 11 open reading frame 82 (C11orf82), mRNA [NM_145018]                               | 8.15526 | down | 7.63438  | down | 158.07306   | 1334.83810   | 123.22599   | 829.54780   | Detected    | Detected | Detected    | Detected    |
| 4552 | A_33_P3401621 | CCNB1     | Hs.23960  | cyclin B1                                                   | Homo sapiens cyclin B1 (CCNB1), mRNA [NM_031966]                                                            | 8.14173 | down | 15.71186 | down | 422.79736   | 3564.36160   | 186.15253   | 2579.06270  | Detected    | Detected | Detected    | Detected    |
| 4553 | A_33_P3333187 |           |           |                                                             |                                                                                                             | 8.13130 | down | 3.19737  | down | 14.85899    | 125.10724    | 16.00103    | 45.11354    | Detected    | Detected | Detected    | Detected    |
| 4554 | A_23_P100632  | HN1       | Hs.532803 | hematological and neurological expressed 1                  | Homo sapiens hematological and neurological expressed 1 (HN1), transcript variant 3, mRNA [NM_001092033]    | 8.12470 | down | 7.20211  | down | 15509.49500 | 130478.28000 | 14559.64100 | 92464.78000 | Detected    | Detected | Detected    | Detected    |
| 4555 | A_23_P216023  | ANGPT1    | Hs.369675 | angiotensinogen 1                                           | Homo sapiens angiotensinogen 1 (ANGPT1), mRNA [NM_0011146]                                                  | 8.09189 | down | 8.49198  | down | 130.44817   | 1093.00240   | 114.93729   | 860.66705   | Detected    | Detected | Detected    | Detected    |
| 4556 | A_23_P93258   | HIST1H3B  | Hs.533292 | histone cluster 1, H3b                                      | Homo sapiens histone cluster 1, H3b (HIST1H3B), mRNA [NM_003537]                                            | 8.06998 | down | 9.86487  | down | 50.12993    | 418.89240    | 40.98689    | 356.53467   | Detected    | Detected | Detected    | Detected    |
| 4557 | A_33_P3242753 |           |           |                                                             |                                                                                                             | 8.04604 | down | 1.19830  | down | 13.02594    | 108.52361    | 2.97160     | 3.13995     | Compromised | Detected | Compromised | Compromised |
| 4558 | A_33_P3713357 | ALCAM     | Hs.591293 | activated leukocyte cell adhesion molecule                  | Homo sapiens activated leukocyte cell adhesion molecule (ALCAM), mRNA [NM_001827]                           | 8.04557 | down | 7.90001  | down | 1559.14640  | 12989.03500  | 1046.42200  | 7289.53760  | Detected    | Detected | Detected    | Detected    |
| 4559 | A_23_P101084  | SPATA22   | Hs.351068 | spermatogenesis associated 22                               | Homo sapiens spermatogenesis associated 22 (SPATA22), mRNA [NM_032598]                                      | 8.04192 | down | 10.18348 | down | 5.01207     | 41.73591     | 2.89951     | 26.03677    | Compromised | Detected | Compromised | Detected    |
| 4560 | A_32_P80245   | ZFP57     | Hs.156326 | zinc finger protein 57 homolog (mouse)                      | Homo sapiens zinc finger protein 57 homolog (mouse) (ZFP57), mRNA [NM_001109809]                            | 8.03661 | down | 16.09754 | down | 9.20946     | 76.63728     | 4.44293     | 63.06582    | Compromised | Detected | Compromised | Detected    |
| 4561 | A_33_P3416009 |           |           |                                                             | Protein downstream neighbor of Son (B17) [Source:UniProtKB/Swiss-Prot;Acc:O9NYP9]; [ENST00000303113]        | 8.02522 | down | 1.78798  | down | 2.66017     | 22.10548     | 3.10114     | 4.88934     | Compromised | Detected | Compromised | Compromised |
| 4562 | A_23_P104741  | KIRREL3   | Hs.657065 | kin of IRRE like 3 (Drosophila)                             | Homo sapiens kin of IRRE like 3 (Drosophila) (KIRREL3), transcript variant 1, mRNA [NM_032531]              | 8.02436 | down | 8.32665  | down | 273.28130   | 2270.66630   | 296.64136   | 2178.04860  | Detected    | Detected | Detected    | Detected    |
| 4563 | A_33_P3221313 | CENPI     | Hs.348920 | centromere protein I                                        | Homo sapiens centromere protein I (CENPI), mRNA [NM_006733]                                                 | 8.02247 | down | 7.61741  | down | 9.91329     | 82.34909     | 9.44057     | 63.41200    | Compromised | Detected | Compromised | Detected    |
| 4564 | A_23_P79803   | VSTM2L    | Hs.517029 | V-set and transmembrane domain containing 2 like            | Homo sapiens V-set and transmembrane domain containing 2 like (VSTM2L), mRNA [NM_080607]                    | 8.01526 | down | 6.87369  | down | 44.37958    | 368.32720    | 49.42203    | 299.55457   | Detected    | Detected | Detected    | Detected    |
| 4565 | A_33_P3260530 | KANK4     | Hs.283398 | KN motif and ankyrin repeat domains 4                       | Homo sapiens KN motif and ankyrin repeat domains 4 (KANK4), mRNA [NM_181712]                                | 7.98969 | down | 7.02322  | down | 10.80301    | 89.37333     | 11.50272    | 71.23648    | Compromised | Detected | Compromised | Detected    |
| 4566 | A_33_P3406836 | HTR1F     | Hs.248136 | 5-hydroxytryptamine (serotonin) receptor 1F                 | Homo sapiens 5-hydroxytryptamine (serotonin) receptor 1F (HTR1F), mRNA [NM_000866]                          | 7.98726 | down | 1.90591  | down | 2.45233     | 20.28198     | 2.65005     | 4.45370     | Compromised | Detected | Compromised | Compromised |
| 4567 | A_33_P3340040 | GINS4     | Hs.656996 | GINS complex subunit 4 (Slid5 homolog)                      | Homo sapiens GINS complex subunit 4 (Slid5 homolog) (GINS4), mRNA [NM_032336]                               | 7.97494 | down | 7.91543  | down | 369.79416   | 3053.65750   | 243.39272   | 1698.82090  | Detected    | Detected | Detected    | Detected    |
| 4568 | A_33_P3377519 | HOXA6     | Hs.679517 | homeobox A6                                                 | Homo sapiens homeobox A6 (HOXA6), mRNA [NM_024014]                                                          | 7.97321 | down | 34.13733 | down | 15.34893    | 126.71986    | 4.61735     | 138.99133   | Detected    | Detected | Compromised | Detected    |
| 4569 | A_23_P368154  | PODN      | Hs.596141 | podocan                                                     | Homo sapiens podocan (PODN), mRNA [NM_153703]                                                               | 7.95705 | down | 10.11153 | down | 6.83837     | 56.34272     | 7.41624     | 66.12500    | Compromised | Detected | Compromised | Detected    |
| 4570 | A_23_P85209   | IL13RA2   | Hs.338046 | interleukin 13 receptor, alpha 2                            | Homo sapiens interleukin 13 receptor, alpha 2 (IL13RA2), mRNA [NM_000640]                                   | 7.94020 | down | 8.26163  | down | 744.42950   | 6120.51860   | 597.87040   | 4355.50150  | Detected    | Detected | Detected    | Detected    |
| 4571 | A_33_P3373259 | CACNA2D3  | Hs.656687 | calcium channel, voltage-dependent, alpha 2/delta subunit 3 | Homo sapiens calcium channel, voltage-dependent, alpha 2/delta subunit 3 (CACNA2D3), mRNA [NM_018398]       | 7.92884 | down | 4.79721  | down | 2.49471     | 20.48158     | 2.77605     | 11.74306    | Compromised | Detected | Compromised | Compromised |
| 4572 | A_32_P213091  | SHISA9    | Hs.130661 | shisa homolog 9 (Xenopus laevis)                            | Homo sapiens shisa homolog 9 (Xenopus laevis) (SHISA9), transcript variant 2, mRNA [NM_001145205]           | 7.92202 | down | 11.34854 | down | 12.20488    | 100.11581    | 6.75044     | 67.55193    | Compromised | Detected | Compromised | Detected    |
| 4573 | A_33_P3380346 | WHSC1     | Hs.113876 | Wolf-Hirschhorn syndrome candidate 1                        | Homo sapiens Wolf-Hirschhorn syndrome candidate 1 (WHSC1), transcript variant 1, mRNA [NM_133330]           | 7.91765 | down | 8.25210  | down | 55.37885    | 454.01804    | 61.53497    | 447.76670   | Detected    | Detected | Detected    | Detected    |
| 4574 | A_24_P393958  | DNAJB4    | Hs.13852  | DnaJ (Hsp40) homolog, subfamily B, member 4                 | Homo sapiens DnaJ (Hsp40) homolog, subfamily B, member 4 (DNAJB4), mRNA [NM_007034]                         | 7.91703 | down | 7.44404  | down | 408.45602   | 3348.42430   | 290.73950   | 1908.43870  | Detected    | Detected | Detected    | Detected    |

|      |               |              |           |                                                                                          |                                                                                                                                                          |         |      |          |      |            |            |            |             |             |             |             |             |
|------|---------------|--------------|-----------|------------------------------------------------------------------------------------------|----------------------------------------------------------------------------------------------------------------------------------------------------------|---------|------|----------|------|------------|------------|------------|-------------|-------------|-------------|-------------|-------------|
| 4575 | A_24_P351466  | KIAA1524     | Hs.591308 | KIAA1524                                                                                 | Homo sapiens KIAA1524 (KIAA1524), mRNA [NM_020890]                                                                                                       | 7.90081 | down | 1.16052  | down | 2.70181    | 22.10339   | 3.26288    | 3.33902     | Compromised | Detected    | Compromised | Compromised |
| 4576 | A_23_P211345  | TBX1         | Hs.173984 | T-box 1                                                                                  | Homo sapiens T-box 1 (TBX1), transcript variant C, mRNA [NM_080647]                                                                                      | 7.87664 | down | 3.06863  | down | 737.68555  | 6016.51860 | 3863.44040 | 10454.02800 | Detected    | Detected    | Detected    | Detected    |
| 4577 | A_24_P827037  | LRRRC15      | Hs.288467 | leucine rich repeat containing 15                                                        | Homo sapiens leucine rich repeat containing 15 (LRRRC15), transcript variant 2, mRNA [NM_130630]                                                         | 7.86060 | down | 7.75884  | down | 394.72665  | 3212.81030 | 334.69840  | 2289.89700  | Detected    | Detected    | Detected    | Detected    |
| 4578 | A_23_P51213   | MYOM3        | Hs.523413 | myomesin family, member 3                                                                | Homo sapiens myomesin family, member 3 (MYOM3), mRNA [NM_152372]                                                                                         | 7.85224 | down | 1.73678  | down | 2.35949    | 19.18428   | 11.41953   | 17.48877    | Compromised | Detected    | Compromised | Detected    |
| 4579 | A_33_P3210363 | LOC100128191 | Hs.594042 | hypothetical protein LOC100128191                                                        | Homo sapiens hypothetical protein LOC100128191 (LOC100128191), non-coding RNA [NR_027157]                                                                | 7.84433 | down | 7.79175  | down | 24.37318   | 197.97092  | 21.18647   | 145.56563   | Detected    | Detected    | Detected    | Detected    |
| 4580 | A_23_P414519  | NRN1         | Hs.103291 | neuritin 1                                                                               | Homo sapiens neuritin 1 (NRN1), mRNA [NM_016588]                                                                                                         | 7.83362 | down | 7.72414  | down | 41.57154   | 337.20316  | 32.53445   | 221.59447   | Detected    | Detected    | Detected    | Detected    |
| 4581 | A_24_P411749  | GPR126       | Hs.318894 | G protein-coupled receptor 126                                                           | Homo sapiens G protein-coupled receptor 126 (GPR126), transcript variant a1, mRNA [NM_020455]                                                            | 7.82096 | down | 6.30008  | down | 2.92353    | 23.67560   | 3.25523    | 18.08394    | Compromised | Detected    | Compromised | Detected    |
| 4582 | A_23_P163195  | LRFN5        | Hs.136893 | leucine rich repeat and fibronectin type III domain containing 5                         | Homo sapiens leucine rich repeat and fibronectin type III domain containing 5 (LRFN5), mRNA [NM_152447]                                                  | 7.82044 | down | 6.88402  | down | 11.98265   | 97.03247   | 14.42112   | 87.54005    | Detected    | Detected    | Detected    | Detected    |
| 4583 | A_33_P3395321 | HN1          | Hs.532803 | hematological and neurological expressed 1                                               | Homo sapiens hematological and neurological expressed 1 (HN1), transcript variant 2, mRNA [NM_001002032]                                                 | 7.79627 | down | 7.66898  | down | 1145.10600 | 9244.12600 | 1722.87100 | 11650.80900 | Detected    | Detected    | Detected    | Detected    |
| 4584 | A_24_P62505   | GLT25D2      | Hs.387995 | glycosyltransferase 25 domain containing 2                                               | Homo sapiens glycosyltransferase 25 domain containing 2 (GLT25D2), mRNA [NM_015101]                                                                      | 7.78782 | down | 8.34892  | down | 14.61055   | 117.81903  | 11.79480   | 86.83330    | Detected    | Detected    | Compromised | Detected    |
| 4585 | A_24_P225534  | RHBDL2       | Hs.524626 | rhomboid, veinlet-like 2 (Drosophila)                                                    | Homo sapiens rhomboid, veinlet-like 2 (Drosophila) (RHBDL2), mRNA [NM_017821]                                                                            | 7.76246 | down | 7.46802  | down | 19.36771   | 155.67212  | 18.00211   | 118.54804   | Detected    | Detected    | Detected    | Detected    |
| 4586 | A_23_P9614    | NDUFA4L2     | Hs.720062 | NADH dehydrogenase (ubiquinone) 1 alpha subcomplex, 4-like 2                             | Homo sapiens NADH dehydrogenase (ubiquinone) 1 alpha subcomplex, 4-like 2 (NDUFA4L2), mRNA [NM_020142]                                                   | 7.74764 | down | 7.30257  | down | 22.48559   | 180.38762  | 19.47534   | 125.40830   | Detected    | Detected    | Detected    | Detected    |
| 4587 | A_33_P3421595 | C2orf27B     | Hs.145567 | chromosome 2 open reading frame 27B                                                      | Homo sapiens chromosome 2 open reading frame 27B (C2orf27B), mRNA [NM_214461]                                                                            | 7.74380 | down | 1.17934  | down | 2.31135    | 18.53332   | 2.45923    | 2.55742     | Compromised | Detected    | Compromised | Compromised |
| 4588 | A_23_P119254  | ASF1B        | Hs.26516  | ASF1 anti-silencing function 1 homolog B (S. cerevisiae)                                 | Homo sapiens ASF1 anti-silencing function 1 homolog B (S. cerevisiae) (ASF1B), mRNA [NM_018154]                                                          | 7.73738 | down | 8.11242  | down | 230.42084  | 1846.07390 | 193.23960  | 1382.33170  | Detected    | Detected    | Detected    | Detected    |
| 4589 | A_23_P162211  | MANSC1       | Hs.591145 | MANSC domain containing 1                                                                | Homo sapiens MANSC domain containing 1 (MANSC1), mRNA [NM_018050]                                                                                        | 7.73232 | down | 10.66141 | down | 11.77426   | 94.27062   | 6.32215    | 59.43534    | Detected    | Detected    | Compromised | Detected    |
| 4590 | A_33_P3229672 | LOC642635    | Hs.580122 | similar to tubulin, alpha 1C                                                             | PREDICTED: Homo sapiens similar to tubulin, alpha 1C (LOC642635), miscRNA [XR_016188]                                                                    | 7.73068 | down | 4.86937  | down | 36.58497   | 292.85568  | 2.37607    | 10.20227    | Detected    | Detected    | Compromised | Compromised |
| 4591 | A_24_P193592  | CCNF         | Hs.1973   | cyclin F                                                                                 | Homo sapiens cyclin F (CCNF), mRNA [NM_001761]                                                                                                           | 7.72817 | down | 9.92364  | down | 27.45196   | 219.67622  | 19.30103   | 168.89502   | Detected    | Detected    | Detected    | Detected    |
| 4592 | A_33_P3224324 | NOX4         | Hs.371036 | NADPH oxidase 4                                                                          | Homo sapiens NADPH oxidase 4 (NOX4), transcript variant 2, mRNA [NM_001143836]                                                                           | 7.72183 | down | 7.18524  | down | 22.75373   | 181.93068  | 26.26116   | 166.38739   | Detected    | Detected    | Detected    | Detected    |
| 4593 | A_33_P3369885 | HEATR7A      | Hs.443139 | HEAT repeat containing 7A                                                                | Homo sapiens HEAT repeat containing 7A (HEATR7A), transcript variant 2, mRNA [NM_001099280]                                                              | 7.71394 | down | 4.63211  | down | 9.50098    | 75.88879   | 14.94341   | 61.03720    | Compromised | Detected    | Detected    | Detected    |
| 4594 | A_23_P389532  | AMAC1        | Hs.514814 | acyl-malonyl condensing enzyme 1                                                         | Homo sapiens acyl-malonyl condensing enzyme 1 (AMAC1), mRNA [NM_152462]                                                                                  | 7.68641 | down | 1.18453  | down | 2.49248    | 19.83752   | 2.81184    | 2.93700     | Compromised | Detected    | Compromised | Compromised |
| 4595 | A_23_P217755  | SHROOM2      | Hs.567236 | shroom family member 2                                                                   | Homo sapiens shroom family member 2 (SHROOM2), mRNA [NM_001649]                                                                                          | 7.68279 | down | 1.18325  | down | 2.36952    | 18.85009   | 2.58399    | 2.69607     | Compromised | Detected    | Compromised | Compromised |
| 4596 | A_23_P325642  | PDIA2        | Hs.66581  | protein disulfide isomerase family A, member 2                                           | Homo sapiens protein disulfide isomerase family A, member 2 (PDIA2), mRNA [NM_006849]                                                                    | 7.67820 | down | 2.23141  | down | 2.34666    | 18.65706   | 4.77714    | 9.39969     | Compromised | Detected    | Compromised | Compromised |
| 4597 | A_23_P116387  | INCENP       | Hs.142179 | inner centromere protein antigens 135/155kDa                                             | Homo sapiens inner centromere protein antigens 135/155kDa (INCENP), transcript variant 1, mRNA [NM_001040894]                                            | 7.65182 | down | 7.48367  | down | 468.88020  | 3715.00630 | 230.12834  | 1518.62410  | Detected    | Detected    | Detected    | Detected    |
| 4598 | A_33_P3292540 | CDKN2C       | Hs.525324 | cyclin-dependent kinase inhibitor 2C (p18, inhibits CDK4)                                | Homo sapiens cyclin-dependent kinase inhibitor 2C (p18, inhibits CDK4) (CDKN2C), transcript variant 2, mRNA [NM_078626]                                  | 7.64785 | down | 7.56589  | down | 791.03455  | 6264.23540 | 677.02120  | 4516.76800  | Detected    | Detected    | Detected    | Detected    |
| 4599 | A_23_P303978  | LOC285943    | Hs.714774 | hypothetical protein LOC285943                                                           | PREDICTED: Homo sapiens hypothetical protein LOC285943 (LOC285943), miscRNA [XR_040113]                                                                  | 7.63318 | down | 5.56984  | down | 2.60220    | 20.56742   | 2.86364    | 14.06456    | Detected    | Compromised | Compromised | Compromised |
| 4600 | A_33_P3346891 | MYBL1        | Hs.445898 | v-myb myeloblastosis viral oncogene homolog (avian)-like 1                               | Homo sapiens v-myb myeloblastosis viral oncogene homolog (avian)-like 1 (MYBL1), transcript variant 2, mRNA [NM_001144755]                               | 7.60397 | down | 6.74603  | down | 2.39734    | 18.87573   | 2.56118    | 15.23542    | Compromised | Detected    | Compromised | Detected    |
| 4601 | A_33_P3282489 | GCNT1        | Hs.521568 | glucosaminyl (N-acetyl) transferase 1, core 2 (beta-1,6-N-acetylglucosaminyltransferase) | Homo sapiens glucosaminyl (N-acetyl) transferase 1, core 2 (beta-1,6-N-acetylglucosaminyltransferase) (GCNT1), transcript variant 1, mRNA [NM_001097634] | 7.60052 | down | 7.40841  | down | 128.86017  | 1014.13390 | 87.73604   | 573.15015   | Detected    | Detected    | Detected    | Detected    |
| 4602 | A_23_P345678  | FANCD2       | Hs.208388 | Fanconi anemia, complementation group D2                                                 | Homo sapiens Fanconi anemia, complementation group D2 (FANCD2), transcript variant 1, mRNA [NM_033084]                                                   | 7.59259 | down | 5.60040  | down | 5.75032    | 45.20794   | 3.79935    | 18.76265    | Compromised | Detected    | Compromised | Detected    |
| 4603 | A_33_P3390097 |              |           |                                                                                          |                                                                                                                                                          | 7.58137 | down | 3.71555  | down | 2.29411    | 18.00925   | 2.39751    | 7.85505     | Compromised | Detected    | Compromised | Compromised |
| 4604 | A_23_P393766  | WDR62        | Hs.116244 | WD repeat domain 62                                                                      | Homo sapiens WD repeat domain 62 (WDR62), transcript variant 2, mRNA [NM_173636]                                                                         | 7.57702 | down | 6.04816  | down | 2.62190    | 20.57065   | 2.84593    | 15.17795    | Compromised | Detected    | Compromised | Detected    |

|      |               |              |           |                                                                                                                       |                                                                                                                                                                                                                    |         |      |          |      |             |             |             |             |             |          |             |             |
|------|---------------|--------------|-----------|-----------------------------------------------------------------------------------------------------------------------|--------------------------------------------------------------------------------------------------------------------------------------------------------------------------------------------------------------------|---------|------|----------|------|-------------|-------------|-------------|-------------|-------------|----------|-------------|-------------|
| 4605 | A_23_P54622   | KIF22        | Hs.612151 | kinesin family member 22                                                                                              | Homo sapiens kinesin family member 22 (KIF22), mRNA [NM_007317]                                                                                                                                                    | 7.55828 | down | 8.31144  | down | 602.46700   | 4715.08400  | 611.75300   | 4483.50730  | Detected    | Detected | Detected    | Detected    |
| 4606 | A_24_P79403   | PF4          | Hs.81564  | platelet factor 4                                                                                                     | Homo sapiens platelet factor 4 (PF4), mRNA [NM_002619]                                                                                                                                                             | 7.51988 | down | 8.05235  | down | 244.66570   | 1905.09730  | 185.89767   | 1319.96450  | Detected    | Detected | Detected    | Detected    |
| 4607 | A_33_P3306018 |              | Hs.689480 |                                                                                                                       | Putative uncharacterized protein FLJ45999 [Source:UniProtKB/Swiss-Prot;Acc:Q6ZRX8] [ENST00000339808]                                                                                                               | 7.50804 | down | 1.18962  | down | 2.55258     | 19.84448    | 3.02145     | 3.16950     | Compromised | Detected | Compromised | Compromised |
| 4608 | A_24_P343095  | DHFR         | Hs.648635 | dihydrofolate reductase                                                                                               | Homo sapiens dihydrofolate reductase (DHFR), mRNA [NM_000791]                                                                                                                                                      | 7.49027 | down | 6.86052  | down | 126.81158   | 983.53430   | 74.60490    | 451.32556   | Detected    | Detected | Detected    | Detected    |
| 4609 | A_33_P3271684 | FAM23A       | Hs.564139 | family with sequence similarity 23, member A                                                                          | Homo sapiens family with sequence similarity 23, member A (FAM23A), mRNA [NM_001098844]                                                                                                                            | 7.48988 | down | 2.19507  | down | 2.35752     | 18.28365    | 9.31568     | 18.03135    | Compromised | Detected | Compromised | Detected    |
| 4610 | A_33_P3257503 | LOC387647    | Hs.660899 | patched domain containing 3 pseudogene                                                                                | Homo sapiens patched domain containing 3 pseudogene (LOC387647), non-coding RNA [NR_003930]                                                                                                                        | 7.48944 | down | 6.77870  | down | 186.28159   | 1444.61610  | 169.56677   | 1013.56696  | Detected    | Detected | Detected    | Detected    |
| 4611 | A_23_P214821  | EDN1         | Hs.511899 | endothelin 1                                                                                                          | Homo sapiens endothelin 1 (EDN1), mRNA [NM_001955]                                                                                                                                                                 | 7.47316 | down | 7.16335  | down | 152.43022   | 1179.52870  | 146.98103   | 928.41644   | Detected    | Detected | Detected    | Detected    |
| 4612 | A_23_P411335  | SGOL2        | Hs.655182 | shugoshin-like 2 (S. pombe)                                                                                           | Homo sapiens shugoshin-like 2 (S. pombe) (SGOL2), transcript variant 1, mRNA [NM_152524]                                                                                                                           | 7.45942 | down | 7.04372  | down | 176.75575   | 1365.24820  | 146.04740   | 907.11280   | Detected    | Detected | Detected    | Detected    |
| 4613 | A_23_P47941   | HOXC11       | Hs.127562 | homeobox C11                                                                                                          | Homo sapiens homeobox C11 (HOXC11), mRNA [NM_014212]                                                                                                                                                               | 7.45110 | down | 5.43341  | down | 2.86383     | 22.09534    | 3.22380     | 15.44565    | Compromised | Detected | Compromised | Compromised |
| 4614 | A_33_P3335915 |              |           |                                                                                                                       | Nesprin-1 (Nuclear envelope spectrin repeat protein 1)(Synaptic nuclear envelope protein 1)(Syn-1)(Myocyte nuclear envelope protein 1)(Myne-1)(Enaptin) [Source:UniProtKB/Swiss-Prot;Acc:Q8NFF9] [ENST00000387253] | 7.44087 | down | 3.30723  | down | 11.74017    | 90.45476    | 9.63939     | 28.11122    | Compromised | Detected | Compromised | Detected    |
| 4615 | A_23_P23074   | IFI44        | Hs.82316  | interferon-induced protein 44                                                                                         | Homo sapiens interferon-induced protein 44 (IFI44), mRNA [NM_006417]                                                                                                                                               | 7.43490 | down | 7.34857  | down | 331.72020   | 2553.76150  | 289.57140   | 1876.39370  | Detected    | Detected | Detected    | Detected    |
| 4616 | A_23_P257385  | GFI1         | Hs.73172  | growth factor independent 1 transcription repressor                                                                   | Homo sapiens growth factor independent 1 transcription repressor (GFI1), transcript variant 1, mRNA [NM_005263]                                                                                                    | 7.40008 | down | 8.15028  | down | 3.86174     | 29.59050    | 3.88114     | 27.89316    | Compromised | Detected | Compromised | Detected    |
| 4617 | A_33_P3398331 | MMP24        | Hs.715494 | matrix metalloproteinase 24 (membrane-inserted)                                                                       | Homo sapiens matrix metalloproteinase 24 (membrane-inserted) (MMP24), mRNA [NM_006690]                                                                                                                             | 7.39601 | down | 5.22235  | down | 77.92255    | 596.75183   | 102.66319   | 472.76556   | Detected    | Detected | Detected    | Detected    |
| 4618 | A_23_P212284  | WDR51A       | Hs.476306 | WD repeat domain 51A                                                                                                  | Homo sapiens WD repeat domain 51A (WDR51A), transcript variant 1, mRNA [NM_015426]                                                                                                                                 | 7.37684 | down | 7.44564  | down | 565.71454   | 4321.16260  | 531.86505   | 3491.95970  | Detected    | Detected | Detected    | Detected    |
| 4619 | A_23_P15146   | IL32         | Hs.943    | interleukin 32                                                                                                        | Homo sapiens interleukin 32 (IL32), transcript variant 1, mRNA [NM_001012631]                                                                                                                                      | 7.37209 | down | 7.45856  | down | 75.85977    | 579.07544   | 91.34475    | 600.76404   | Detected    | Detected | Detected    | Detected    |
| 4620 | A_33_P3254606 | WDR62        | Hs.116244 | WD repeat domain 62                                                                                                   | Homo sapiens WD repeat domain 62 (WDR62), transcript variant 1, mRNA [NM_001083961]                                                                                                                                | 7.35212 | down | 20.23320 | down | 1323.76900  | 10077.61200 | 303.36768   | 5412.51860  | Detected    | Detected | Detected    | Detected    |
| 4621 | A_23_P254507  | HOPX         | Hs.619396 | HOP homeobox                                                                                                          | Homo sapiens HOP homeobox (HOPX), transcript variant 2, mRNA [NM_139211]                                                                                                                                           | 7.33903 | down | 4.90331  | down | 8.58035     | 65.20436    | 12.33005    | 53.31134    | Compromised | Detected | Compromised | Detected    |
| 4622 | A_24_P315444  | LOC644422    | Hs.647418 | similar to arginine/serine-rich splicing factor 6                                                                     | PREDICTED: Homo sapiens similar to arginine/serine-rich splicing factor 6 (LOC644422), miscRNA [XR_019449]                                                                                                         | 7.32011 | down | 6.44472  | down | 19.13226    | 145.01631   | 12.38194    | 70.36520    | Detected    | Detected | Compromised | Detected    |
| 4623 | A_33_P3348239 | FBN1         | Hs.591133 | fibrillin 1                                                                                                           | Homo sapiens fibrillin 1 (FBN1), mRNA [NM_000138]                                                                                                                                                                  | 7.29662 | down | 7.22852  | down | 449.62375   | 3397.06470  | 228.90285   | 1459.03560  | Detected    | Detected | Detected    | Detected    |
| 4624 | A_32_P151800  | FAM72D       | Hs.535577 | family with sequence similarity 72, member D                                                                          | Homo sapiens family with sequence similarity 72, member D (FAM72D), mRNA [NM_207418]                                                                                                                               | 7.29141 | down | 7.81327  | down | 99.80597    | 753.53080   | 78.22633    | 538.95370   | Detected    | Detected | Detected    | Detected    |
| 4625 | A_23_P303548  |              | Hs.516978 |                                                                                                                       | Uncharacterized protein C20orf112 [Source:UniProtKB/Swiss-Prot;Acc:Q96MY1] [ENST00000375673]                                                                                                                       | 7.28696 | down | 3.82088  | down | 2.39316     | 18.05723    | 5.46754     | 18.42136    | Compromised | Detected | Compromised | Detected    |
| 4626 | A_24_P166613  | EPDR1        | Hs.710629 | ependymin related protein 1 (zebrafish)                                                                               | Homo sapiens ependymin related protein 1 (zebrafish) (EPDR1), mRNA [NM_017549]                                                                                                                                     | 7.27352 | down | 7.41466  | down | 1212.02860  | 9128.30800  | 854.52750   | 5587.05400  | Detected    | Detected | Detected    | Detected    |
| 4627 | A_23_P103720  | AGMAT        | Hs.567583 | agmatine ureohydrolase (agmatinase)                                                                                   | Homo sapiens agmatine ureohydrolase (agmatinase) (AGMAT), mRNA [NM_024758]                                                                                                                                         | 7.24898 | down | 7.00531  | down | 65.23018    | 489.61954   | 54.77769    | 338.37344   | Detected    | Detected | Detected    | Detected    |
| 4628 | A_33_P3312119 | LOC100130967 | Hs.32804  | similar to Putative uncharacterized protein C6orf99                                                                   | Putative uncharacterized protein C6orf99 [Source:UniProtKB/Swiss-Prot;Acc:Q4VX62] [ENST00000367072]                                                                                                                | 7.21510 | down | 2.92233  | down | 2.34195     | 17.49656    | 2.47695     | 6.38280     | Compromised | Detected | Compromised | Compromised |
| 4629 | A_24_P191312  | SLC1A4       | Hs.654352 | solute carrier family 1 (glutamate/neutral amino acid transporter), member 4 (SLC1A4), transcript variant 1, member 4 | Homo sapiens solute carrier family 1 (glutamate/neutral amino acid transporter), member 4 (SLC1A4), transcript variant 1, mRNA [NM_003038]                                                                         | 7.20153 | down | 7.70999  | down | 27.29878    | 203.56401   | 19.12932    | 130.05249   | Detected    | Detected | Detected    | Detected    |
| 4630 | A_24_P510377  |              | Hs.647667 |                                                                                                                       | Homo sapiens cDNA clone IMAGE:5268928 [BC031250]                                                                                                                                                                   | 7.18389 | down | 7.82237  | down | 26.63440    | 198.12343   | 21.52508    | 148.47331   | Detected    | Detected | Detected    | Detected    |
| 4631 | A_23_P208880  | UHRF1        | Hs.108106 | ubiquitin-like with PHD and ring finger domains 1                                                                     | Homo sapiens ubiquitin-like with PHD and ring finger domains 1 (UHRF1), transcript variant 2, mRNA [NM_013282]                                                                                                     | 7.17819 | down | 7.18468  | down | 543.58500   | 4040.31570  | 392.17184   | 2484.55930  | Detected    | Detected | Detected    | Detected    |
| 4632 | A_33_P3350634 | KIF22        | Hs.612151 | kinesin family member 22                                                                                              | Homo sapiens kinesin family member 22 (KIF22), mRNA [NM_007317]                                                                                                                                                    | 7.16857 | down | 7.95159  | down | 549.70230   | 4080.30710  | 545.88920   | 3827.57760  | Detected    | Detected | Detected    | Detected    |
| 4633 | A_33_P3565632 | DNAH17       | Hs.713207 | dynein, axonemal, heavy chain 17                                                                                      | full-length cDNA clone CSDD_J02Y114 of T cells (Jurkat cell line) Cot 10-normalized of Homo sapiens (human) [CR620279]                                                                                             | 7.16679 | down | 3.99481  | down | 2.94526     | 21.85653    | 2.96272     | 10.43644    | Compromised | Detected | Compromised | Compromised |
| 4634 | A_23_P125265  | KPNA2        | Hs.594238 | karyopherin alpha 2 (RAG cohort 1, importin alpha 1)                                                                  | Homo sapiens karyopherin alpha 2 (RAG cohort 1, importin alpha 1) (KPNA2), mRNA [NM_002266]                                                                                                                        | 7.16243 | down | 7.26291  | down | 13168.67100 | 97664.22000 | 11489.94900 | 73585.86000 | Detected    | Detected | Detected    | Detected    |

|      |               |            |           |                                                                                               |                                                                                                                                                               |         |      |          |      |            |             |            |             |             |          |             |             |
|------|---------------|------------|-----------|-----------------------------------------------------------------------------------------------|---------------------------------------------------------------------------------------------------------------------------------------------------------------|---------|------|----------|------|------------|-------------|------------|-------------|-------------|----------|-------------|-------------|
| 4635 | A_23_P389919  | WHSC1      | Hs.113876 | Wolf-Hirschhorn syndrome candidate 1                                                          | Homo sapiens Wolf-Hirschhorn syndrome candidate 1 (WHSC1), transcript variant 1, mRNA [NM_133330]                                                             | 7.14438 | down | 7.39252  | down | 281.71732  | 2084.06370  | 170.28557  | 1110.03270  | Detected    | Detected | Detected    | Detected    |
| 4636 | A_33_P3846177 | B4GALNT1   | Hs.591019 | beta-1,4-N-acetyl-galactosaminyl transferase 1                                                | Homo sapiens beta-1,4-N-acetyl-galactosaminyl transferase 1 (B4GALNT1), mRNA [NM_001478]                                                                      | 7.11685 | down | 9.29604  | down | 66.17393   | 487.64984   | 53.93387   | 442.10440   | Detected    | Detected | Detected    | Detected    |
| 4637 | A_33_P3309607 |            |           |                                                                                               | Shugoshin-like 2 (Shugoshin-2)(Sgo2)(Trpin) [Source:UniProtKB/Swiss-Prot;Acc:G562F6] [ENST00000409203]                                                        | 7.11526 | down | 3.00319  | down | 2.81874    | 20.76727    | 3.15542    | 8.35612     | Compromised | Detected | Compromised | Compromised |
| 4638 | A_24_P38895   | H2AFX      | Hs.477879 | H2A histone family, member X                                                                  | Homo sapiens H2A histone family, member X (H2AFX), mRNA [NM_002105]                                                                                           | 7.10123 | down | 7.81943  | down | 5255.39300 | 38643.08600 | 3028.78760 | 20883.78700 | Detected    | Detected | Detected    | Detected    |
| 4639 | A_23_P416395  | STC2       | Hs.233160 | stanniocalcin 2                                                                               | Homo sapiens stanniocalcin 2 (STC2), mRNA [NM_003714]                                                                                                         | 7.09909 | down | 7.20956  | down | 760.89970  | 5591.76900  | 383.56146  | 2438.42300  | Detected    | Detected | Detected    | Detected    |
| 4640 | A_23_P137484  | L1TD1      | Hs.685462 | LINE-1 type transposase domain containing 1                                                   | Homo sapiens LINE-1 type transposase domain containing 1 (L1TD1), transcript variant 2, mRNA [NM_019079]                                                      | 7.09807 | down | 6.72630  | down | 2.36338    | 17.37025    | 2.53584    | 15.04053    | Compromised | Detected | Compromised | Detected    |
| 4641 | A_23_P345707  | C15orf42   | Hs.441708 | chromosome 15 open reading frame 42                                                           | Homo sapiens chromosome 15 open reading frame 42 (C15orf42), mRNA [NM_152259]                                                                                 | 7.09366 | down | 6.21526  | down | 41.35231   | 303.74072   | 41.48024   | 227.33504   | Detected    | Detected | Detected    | Detected    |
| 4642 | A_33_P3280729 | SHISA9     | Hs.130661 | shisa homolog 9 (Xenopus laevis)                                                              | Homo sapiens shisa homolog 9 (Xenopus laevis) (SHISA9), transcript variant 1, mRNA [NM_00145204]                                                              | 7.08224 | down | 6.57391  | down | 4.85130    | 35.57634    | 3.31543    | 19.21895    | Compromised | Detected | Compromised | Detected    |
| 4643 | A_24_P99090   | CKAP2      | Hs.444028 | cytoskeleton associated protein 2                                                             | Homo sapiens cytoskeleton associated protein 2 (CKAP2), transcript variant 1, mRNA [NM_018204]                                                                | 7.06006 | down | 8.58591  | down | 35.90656   | 262.49136   | 17.67922   | 133.84901   | Detected    | Detected | Detected    | Detected    |
| 4644 | A_23_P141802  | SERPINB7   | Hs.138202 | serpin peptidase inhibitor, clade B (ovalbumin), member 7                                     | Homo sapiens serpin peptidase inhibitor, clade B (ovalbumin), member 7 (SERPINB7), transcript variant 2, mRNA [NM_001040147]                                  | 7.04484 | down | 7.08274  | down | 66.62235   | 485.98645   | 74.93073   | 467.97940   | Detected    | Detected | Detected    | Detected    |
| 4645 | A_23_P26037   | FRMD5      | Hs.578544 | FERM domain containing 5                                                                      | Homo sapiens FERM domain containing 5 (FRMD5), transcript variant 2, mRNA [NM_032892]                                                                         | 7.03087 | down | 5.10688  | down | 30.18117   | 219.72450   | 20.69545   | 93.19758    | Detected    | Detected | Detected    | Detected    |
| 4646 | A_23_P216429  | ASPN       | Hs.435655 | asporin                                                                                       | Homo sapiens asporin (ASPN), mRNA [NM_017890]                                                                                                                 | 7.01575 | down | 5.65270  | down | 6.12644    | 44.50567    | 12.62557   | 62.93216    | Compromised | Detected | Detected    | Detected    |
| 4647 | A_33_P3227360 |            |           |                                                                                               | Homeobox protein DLX-1 [Source:UniProtKB/Swiss-Prot;Acc:P56177] [ENST00000409492]                                                                             | 6.99283 | down | 1.92949  | down | 2.47228    | 17.90130    | 7.70356    | 13.10687    | Compromised | Detected | Compromised | Compromised |
| 4648 | A_24_P330303  | FRMD6      | Hs.434914 | FERM domain containing 6                                                                      | Homo sapiens FERM domain containing 6 (FRMD6), transcript variant 1, mRNA [NM_001042481]                                                                      | 6.96897 | down | 6.33512  | down | 2243.21830 | 16187.25400 | 1651.06080 | 9223.23800  | Detected    | Detected | Detected    | Detected    |
| 4649 | A_33_P3423755 | NCRNA00200 | Hs.721191 | non-protein coding RNA 200                                                                    | Homo sapiens non-protein coding RNA 200 (NCRNA00200), non-coding RNA [NR_015376]                                                                              | 6.95478 | down | 3.78349  | down | 2.68139    | 19.30973    | 3.14298    | 10.48575    | Compromised | Detected | Compromised | Compromised |
| 4650 | A_24_P680657  | CCDC73     | Hs.706808 | coiled-coil domain containing 73                                                              | Homo sapiens coiled-coil domain containing 73 (CCDC73), mRNA [NM_001008391]                                                                                   | 6.94328 | down | 4.52524  | down | 2.81349    | 20.22758    | 3.15073    | 12.57240    | Compromised | Detected | Compromised | Compromised |
| 4651 | A_33_P3380502 | GPR85      | Hs.152009 | G protein-coupled receptor 85                                                                 | Homo sapiens G protein-coupled receptor 85 (GPR85), transcript variant 1, mRNA [NM_001146265]                                                                 | 6.93154 | down | 1.99166  | down | 2.54855    | 18.29177    | 2.94568    | 5.17329     | Compromised | Detected | Compromised | Compromised |
| 4652 | A_24_P41850   | MASP1      | Hs.89983  | mannan-binding lectin serine peptidase 1 (C4/C2 activating component of Ra-reactive factor)   | Homo sapiens mannan-binding lectin serine peptidase 1 (C4/C2 activating component of Ra-reactive factor) (MASP1), transcript variant 3, mRNA [NM_001031849]   | 6.92804 | down | 8.09283  | down | 49.45198   | 354.75385   | 39.38162   | 281.03452   | Detected    | Detected | Detected    | Detected    |
| 4653 | A_23_P49060   | SPINT1     | Hs.233950 | serine peptidase inhibitor, Kunitz type 1                                                     | Homo sapiens serine peptidase inhibitor, Kunitz type 1 (SPINT1), transcript variant 1, mRNA [NM_181842]                                                       | 6.90691 | down | 1.58971  | down | 2.74321    | 19.61894    | 2.91923    | 4.09215     | Compromised | Detected | Compromised | Compromised |
| 4654 | A_33_P3404480 | MPP4       | Hs.63085  | membrane protein, palmitoylated 4 (MAGUK p55 subfamily member 4)                              | Homo sapiens membrane protein, palmitoylated 4 (MAGUK p55 subfamily member 4) (MPP4), mRNA [NM_033066]                                                        | 6.90163 | down | 7.00214  | down | 36.59691   | 261.53442   | 26.78828   | 165.40224   | Detected    | Detected | Detected    | Detected    |
| 4655 | A_33_P3306894 | C11orf41   | Hs.502266 | chromosome 11 open reading frame 41                                                           | Homo sapiens chromosome 11 open reading frame 41 (C11orf41), mRNA [NM_012194]                                                                                 | 6.88529 | down | 9.30900  | down | 26.13967   | 186.36116   | 14.15435   | 116.18719   | Detected    | Detected | Compromised | Detected    |
| 4656 | A_33_P339593  | CCDC134    | Hs.474991 | coiled-coil domain containing 134                                                             | Homo sapiens coiled-coil domain containing 134 (CCDC134), mRNA [NM_024821]                                                                                    | 6.86174 | down | 9.48781  | down | 16.88953   | 120.00094   | 14.09410   | 117.91490   | Detected    | Detected | Compromised | Detected    |
| 4657 | A_23_P38732   | CDH2       | Hs.464829 | cadherin 2, type 1, N-cadherin (neuronal)                                                     | Homo sapiens cadherin 2, type 1, N-cadherin (neuronal) (CDH2), mRNA [NM_001782]                                                                               | 6.85809 | down | 7.23005  | down | 213.39350  | 1515.36610  | 191.76831  | 1222.59730  | Detected    | Detected | Detected    | Detected    |
| 4658 | A_24_P158089  | SERPINE1   | Hs.414795 | serpin peptidase inhibitor, clade E (nexin, plasminogen activator inhibitor type 1), member 1 | Homo sapiens serpin peptidase inhibitor, clade E (nexin, plasminogen activator inhibitor type 1), member 1 (SERPINE1), transcript variant 1, mRNA [NM_000602] | 6.85678 | down | 6.87765  | down | 3734.19600 | 26512.47300 | 3013.17300 | 18273.82000 | Detected    | Detected | Detected    | Detected    |
| 4659 | A_24_P349965  | TCF19      | Hs.584807 | transcription factor 19                                                                       | Homo sapiens transcription factor 19 (TCF19), transcript variant 1, mRNA [NM_007109]                                                                          | 6.84845 | down | 5.67077  | down | 104.10759  | 738.25775   | 50.87435   | 254.39395   | Detected    | Detected | Detected    | Detected    |
| 4660 | A_33_P3267296 | FKBP11     | Hs.655103 | FK506 binding protein 11, 19 kDa                                                              | Homo sapiens FK506 binding protein 11, 19 kDa (FKBP11), transcript variant 1, mRNA [NM_016594]                                                                | 6.84568 | down | 6.44818  | down | 2607.15200 | 18480.60200 | 2472.24100 | 14057.02900 | Detected    | Detected | Detected    | Detected    |
| 4661 | A_33_P3230259 | NOAPH      | Hs.308045 | non-SMC condensin I complex, subunit H                                                        | Homo sapiens non-SMC condensin I complex, subunit H (NOAPH), mRNA [NM_015341]                                                                                 | 6.83272 | down | 32.82832 | down | 24.60024   | 174.04689   | 3.94879    | 114.30852   | Detected    | Detected | Compromised | Detected    |
| 4662 | A_24_P53241   | MYOCD      | Hs.567641 | myocardin                                                                                     | Homo sapiens myocardin (MYOCD), transcript variant 2, mRNA [NM_153604]                                                                                        | 6.82716 | down | 1.18478  | down | 2.37836    | 16.81319    | 2.52439    | 2.63730     | Compromised | Detected | Compromised | Compromised |

|      |               |              |           |                                                                 |                                                                                                                           |         |      |          |      |            |             |            |             |             |              |             |             |
|------|---------------|--------------|-----------|-----------------------------------------------------------------|---------------------------------------------------------------------------------------------------------------------------|---------|------|----------|------|------------|-------------|------------|-------------|-------------|--------------|-------------|-------------|
| 4663 | A_24_P149124  | C5orf13      | Hs.36053  | chromosome 5 open reading frame 13                              | Homo sapiens chromosome 5 open reading frame 13 (C5orf13), transcript variant 1, mRNA [NM_004772]                         | 6.82491 | down | 6.92562  | down | 3553.91550 | 25115.22900 | 2497.92970 | 15254.72900 | Detected    | Detected     | Detected    | Detected    |
| 4664 | A_23_P363174  | HIST1H2AL    | Hs.233568 | histone cluster 1, H2al                                         | Homo sapiens histone cluster 1, H2al (HIST1H2AL), mRNA [NM_003511]                                                        | 6.81042 | down | 13.66239 | down | 7.46676    | 52.65493    | 3.13748    | 37.79842    | Compromised | Detected     | Compromised | Detected    |
| 4665 | A_33_P3415240 | LOC730091    | Hs.659905 | hypothetical protein LOC730091                                  | Homo sapiens cDNA FLJ31839 fis, clone NT2RP7000086 [AK056401]                                                             | 6.81001 | down | 5.76382  | down | 3.03202    | 21.38025    | 3.53777    | 17.98065    | Compromised | Detected     | Compromised | Detected    |
| 4666 | A_33_P3404989 | HIST1H3H     | Hs.591778 | histone cluster 1, H3h                                          | Homo sapiens histone cluster 1, H3h (HIST1H3H), mRNA [NM_003536]                                                          | 6.80866 | down | 3.94233  | down | 5.74341    | 40.49154    | 6.64482    | 23.09946    | Compromised | Detected     | Compromised | Detected    |
| 4667 | A_33_P3332328 | HOXD9        | Hs.236646 | homeobox D9                                                     | Homo sapiens homeobox D9 (HOXD9), mRNA [NM_014213]                                                                        | 6.80310 | down | 9.28005  | down | 8.14635    | 57.38559    | 3.47431    | 28.43046    | Compromised | Detected     | Compromised | Detected    |
| 4668 | A_33_P3278362 | ANKRD2       | Hs.73708  | ankyrin repeat domain 2 (stretch responsive muscle)             | Homo sapiens ankyrin repeat domain 2 (stretch responsive muscle) (ANKRD2), transcript variant 1, mRNA [NM_020349]         | 6.78587 | down | 7.13792  | down | 53.20981   | 373.87830   | 53.70923   | 338.05417   | Detected    | Detected     | Detected    | Detected    |
| 4669 | A_33_P3247022 | CCNE2        | Hs.567387 | cyclin E2                                                       | Homo sapiens cyclin E2 (CCNE2), mRNA [NM_057749]                                                                          | 6.77906 | down | 6.67016  | down | 73.33092   | 514.74200   | 45.47872   | 267.49158   | Detected    | Detected     | Detected    | Detected    |
| 4670 | A_33_P3238305 |              | Hs.222802 |                                                                 | TAK1-like protein [Source:UniProtKB/Swiss-Prot;Acc:P57077] [ENST00000399926]                                              | 6.76676 | down | 7.55498  | down | 16.61694   | 116.43003   | 22.05594   | 146.93471   | Detected    | Detected     | Detected    | Detected    |
| 4671 | A_23_P94338   | ENPP2        | Hs.190977 | ectonucleotide pyrophosphatase/phosphodiesterase 2              | Homo sapiens ectonucleotide pyrophosphatase/phosphodiesterase 2 (ENPP2), transcript variant 1, mRNA [NM_006209]           | 6.76665 | down | 7.40220  | down | 819.57050  | 5742.39650  | 646.95416  | 4222.79500  | Detected    | Detected     | Detected    | Detected    |
| 4672 | A_33_P3275500 | LOC400743    | Hs.522935 | FLJ45933 protein                                                | Homo sapiens cDNA FLJ45933 fis, clone PLACE7003639 [AK127830]                                                             | 6.74668 | down | 8.70307  | down | 14.38889   | 100.37981   | 9.80482    | 75.24503    | Detected    | Detected     | Compromised | Detected    |
| 4673 | A_24_P65557   | GPR37        | Hs.719904 | G protein-coupled receptor 37 (endothelin receptor type B-like) | Homo sapiens G protein-coupled receptor 37 (endothelin receptor type B-like) (GPR37), mRNA [NM_005302]                    | 6.71799 | down | 1.18178  | down | 2.45177    | 17.05505    | 2.63798    | 2.74898     | Compromised | Detected     | Compromised | Compromised |
| 4674 | A_33_P3579336 | LOC285000    | Hs.295012 | hypothetical protein LOC285000                                  | Homo sapiens hypothetical protein LOC285000, mRNA (cDNA clone IMAGE:3925223), partial cds [BC038566]                      | 6.71730 | down | 1.18576  | down | 3.66306    | 25.47837    | 2.87368    | 3.00469     | Compromised | Detected     | Compromised | Compromised |
| 4675 | A_33_P3314574 | hCG_2045048  | Hs.617162 | hCG2045048                                                      | PREDICTED: Homo sapiens hCG2045048 (LOC644058), mRNA [XM_001724795]                                                       | 6.71338 | down | 4.95306  | down | 12.11299   | 84.20258    | 14.58711   | 63.71010    | Compromised | Detected     | Compromised | Detected    |
| 4676 | A_32_P67697   | HLA-DRA      | Hs.520048 | major histocompatibility complex, class II, DR alpha            | Homo sapiens major histocompatibility complex, class II, DR alpha (HLA-DRA), mRNA [NM_019111]                             | 6.71135 | down | 3.64946  | down | 2.51772    | 17.49646    | 5.39050    | 17.34696    | Compromised | Compromised  | Compromised | Detected    |
| 4677 | A_33_P3342175 | LOC100130580 | Hs.662160 | hypothetical protein LOC100130580                               | Homo sapiens cDNA FLJ44644 fis, clone BRACE2033128 [AK126607]                                                             | 6.70626 | down | 3.79311  | down | 2.40093    | 16.67222    | 2.54488    | 8.51194     | Compromised | Detected     | Compromised | Compromised |
| 4678 | A_23_P25121   | FKBP11       | Hs.655103 | FK506 binding protein 11, 19 kDa                                | Homo sapiens FK506 binding protein 11, 19 kDa (FKBP11), transcript variant 1, mRNA [NM_016594]                            | 6.70528 | down | 6.83608  | down | 2337.28120 | 16227.85900 | 2160.92260 | 13026.02500 | Detected    | Detected     | Detected    | Detected    |
| 4679 | A_23_P132644  | NCEH1        | Hs.444099 | neutral cholesterol ester hydrolase 1                           | Homo sapiens neutral cholesterol ester hydrolase 1 (NCEH1), transcript variant 2, mRNA [NM_020792]                        | 6.69268 | down | 6.59590  | down | 1132.31040 | 7846.91100  | 800.06177  | 4653.32030  | Detected    | Detected     | Detected    | Detected    |
| 4680 | A_23_P154050  | PFTK2        | Hs.348711 | PFTAIRE protein kinase 2                                        | Homo sapiens PFTAIRE protein kinase 2 (PFTK2), mRNA [NM_139158]                                                           | 6.64088 | down | 17.48687 | down | 9.38029    | 64.36475    | 3.20096    | 49.35809    | Compromised | Detected     | Compromised | Detected    |
| 4681 | A_23_P111947  | CDH17        | Hs.591853 | cadherin 17, LI cadherin (liver-intestine)                      | Homo sapiens cadherin 17, LI cadherin (liver-intestine) (CDH17), transcript variant 1, mRNA [NM_004063]                   | 6.63649 | down | 1.30328  | down | 2.76736    | 19.01676    | 2.73337    | 3.14125     | Compromised | Not Detected | Compromised | Compromised |
| 4682 | A_23_P27013   | HOXB9        | Hs.463350 | homeobox B9                                                     | Homo sapiens homeobox B9 (HOXB9), mRNA [NM_024017]                                                                        | 6.62605 | down | 30.84917 | down | 48.61058   | 333.51770   | 12.12613   | 329.86115   | Detected    | Detected     | Compromised | Detected    |
| 4683 | A_32_P4595    | SGCD         | Hs.387207 | sarcoglycan, delta (35kDa dystrophin-associated glycoprotein)   | Homo sapiens sarcoglycan, delta (35kDa dystrophin-associated glycoprotein) (SGCD), transcript variant 1, mRNA [NM_000337] | 6.62601 | down | 7.35240  | down | 344.43780  | 2363.17630  | 177.88036  | 1153.24710  | Detected    | Detected     | Detected    | Detected    |
| 4684 | A_23_P333228  | MARCH4       | Hs.170388 | membrane-associated ring finger (C3HC4) 4                       | Homo sapiens membrane-associated ring finger (C3HC4) 4 (MARCH4), mRNA [NM_020814]                                         | 6.59814 | down | 6.70920  | down | 263.17224  | 1798.02190  | 121.30525  | 717.65485   | Detected    | Detected     | Detected    | Detected    |
| 4685 | A_23_P323102  | PODHA9       | Hs.199343 | protocadherin alpha 9                                           | Homo sapiens protocadherin alpha 9 (PODHA9), transcript variant 2, mRNA [NM_014005]                                       | 6.58658 | down | 1.06788  | down | 2.38889    | 16.29255    | 2.78823    | 2.62553     | Compromised | Detected     | Compromised | Compromised |
| 4686 | A_24_P402438  | TGFB2        | Hs.133379 | transforming growth factor, beta 2                              | Homo sapiens transforming growth factor, beta 2 (TGFB2), transcript variant 2, mRNA [NM_003238]                           | 6.58090 | down | 5.85699  | down | 4.42885    | 30.17932    | 3.12999    | 16.16530    | Compromised | Detected     | Compromised | Detected    |
| 4687 | A_23_P135271  | B4GALT1      | Hs.272011 | UDP-GalbetaGlcNAc beta 1,4-galactosyltransferase, polypeptide 1 | Homo sapiens UDP-GalbetaGlcNAc beta 1,4-galactosyltransferase, polypeptide 1 (B4GALT1), mRNA [NM_001497]                  | 6.57904 | down | 7.85385  | down | 119.75061  | 815.78046   | 107.91601  | 747.36670   | Detected    | Detected     | Detected    | Detected    |
| 4688 | A_33_P3320493 |              |           |                                                                 | Retinoic acid-induced protein 1 [Source:UniProtKB/Swiss-Prot;Acc:Q7Z5J4] [ENST00000395776]                                | 6.57799 | down | 7.30047  | down | 40.42079   | 275.31573   | 35.76899   | 230.26225   | Detected    | Detected     | Detected    | Detected    |
| 4689 | A_23_P315836  | BAIAP2       | Hs.128316 | BAI1-associated protein 2                                       | Homo sapiens BAI1-associated protein 2 (BAIAP2), transcript variant 2, mRNA [NM_017451]                                   | 6.57558 | down | 13.38980 | down | 13.31569   | 90.66317    | 7.23191    | 85.38717    | Detected    | Detected     | Compromised | Detected    |
| 4690 | A_23_P379034  | BAIAP2L2     | Hs.474822 | BAI1-associated protein 2-like 2                                | Homo sapiens BAI1-associated protein 2-like 2 (BAIAP2L2), mRNA [NM_025045]                                                | 6.54253 | down | 6.68389  | down | 631.55510  | 4278.48800  | 472.11224  | 2782.53200  | Detected    | Detected     | Detected    | Detected    |
| 4691 | A_23_P113777  | ITGBL1       | Hs.696554 | integrin, beta-like 1 (with EGF-like repeat domains)            | Homo sapiens integrin, beta-like 1 (with EGF-like repeat domains) (ITGBL1), mRNA [NM_004791]                              | 6.53246 | down | 6.56886  | down | 965.24610  | 6529.00930  | 656.64970  | 3803.54880  | Detected    | Detected     | Detected    | Detected    |
| 4692 | A_23_P152136  | GINS3        | Hs.47125  | GINS complex subunit 3 (Paf3 homolog)                           | Homo sapiens GINS complex subunit 3 (Paf3 homolog) (GINS3), transcript variant 2, mRNA [NM_022770]                        | 6.52575 | down | 6.62575  | down | 596.59766  | 4031.30100  | 504.73474  | 2948.92680  | Detected    | Detected     | Detected    | Detected    |
| 4693 | A_33_P3346533 |              |           |                                                                 |                                                                                                                           | 6.52480 | down | 6.35305  | down | 410.29510  | 2772.01980  | 435.57750  | 2440.13090  | Detected    | Detected     | Detected    | Detected    |

|      |               |           |           |                                                                                                                                                                    |         |      |          |      |            |             |            |             |             |          |             |             |
|------|---------------|-----------|-----------|--------------------------------------------------------------------------------------------------------------------------------------------------------------------|---------|------|----------|------|------------|-------------|------------|-------------|-------------|----------|-------------|-------------|
| 4694 | A_24_P913227  |           |           | Cell division cycle protein 23 homolog (Anaphase-promoting complex subunit 8)(APC8)/Cyclosome subunit 8 [Source:UniProtKB/Swiss-Prot;Acc:Q9LJX2] [ENST00000384884] | 6.49663 | down | 6.60895  | down | 17.01369   | 114.45108   | 9.85829    | 57.45121    | Detected    | Detected | Compromised | Detected    |
| 4695 | A_23_P84821   | MRPL1     | Hs.532019 | mitochondrial ribosomal protein L1                                                                                                                                 | 6.49642 | down | 7.72029  | down | 94.57562   | 636.18896   | 74.86021   | 509.62450   | Detected    | Detected | Detected    | Detected    |
| 4696 | A_33_P3880302 | EPHB2     | Hs.523329 | EPH receptor B2                                                                                                                                                    | 6.48655 | down | 6.93127  | down | 39.10874   | 262.67606   | 38.19669   | 233.45590   | Detected    | Detected | Detected    | Detected    |
| 4697 | A_23_P404481  | SIPR1     | Hs.154210 | sphingosine-1-phosphate receptor 1                                                                                                                                 | 6.48174 | down | 6.43488  | down | 87.14776   | 584.89886   | 85.48776   | 485.07590   | Detected    | Detected | Detected    | Detected    |
| 4698 | A_33_P3511265 | POSTN     | Hs.136348 | periostin, osteoblast specific factor                                                                                                                              | 6.47247 | down | 5.67182  | down | 79.03504   | 529.69110   | 86.29932   | 431.61410   | Detected    | Detected | Detected    | Detected    |
| 4699 | A_24_P169634  | MBL1P1    | Hs.102310 | mannose-binding lectin (protein A) 1, pseudogene 1                                                                                                                 | 6.46852 | down | 4.97035  | down | 3.97766    | 26.64194    | 8.55314    | 37.48676    | Compromised | Detected | Compromised | Detected    |
| 4700 | A_23_P411353  | ZOCHC5    | Hs.134873 | zinc finger, CCHC domain containing 5                                                                                                                              | 6.46330 | down | 1.33284  | down | 3.32482    | 22.25131    | 14.20888   | 16.69952    | Compromised | Detected | Detected    | Detected    |
| 4701 | A_33_P3379215 | LOC402198 |           | similar to hCG1641913                                                                                                                                              | 6.46290 | down | 1.18503  | down | 2.38070    | 15.93180    | 2.53013    | 2.64385     | Compromised | Detected | Compromised | Compromised |
| 4702 | A_23_P84860   | FAM107A   | Hs.506357 | family with sequence similarity 107, member A                                                                                                                      | 6.45651 | down | 8.28226  | down | 28.03433   | 187.42232   | 20.42995   | 149.20438   | Detected    | Detected | Detected    | Detected    |
| 4703 | A_33_P3337154 |           |           |                                                                                                                                                                    | 6.45579 | down | 3.51677  | down | 7.35498    | 49.16594    | 11.72220   | 36.35116    | Compromised | Detected | Compromised | Detected    |
| 4704 | A_33_P3217819 | CCNE2     | Hs.567387 | cyclin E2                                                                                                                                                          | 6.45379 | down | 9.03854  | down | 7.36852    | 49.24119    | 3.61515    | 28.81312    | Compromised | Detected | Compromised | Detected    |
| 4705 | A_33_P3418209 | ITGEBL1   | Hs.696554 | integrin, beta-like 1 (with EGF-like repeat domains)                                                                                                               | 6.44727 | down | 6.12141  | down | 1171.59300 | 7821.42140  | 952.68840  | 5142.42720  | Detected    | Detected | Detected    | Detected    |
| 4706 | A_24_P111996  | HFE       | Hs.233325 | hemochromatosis                                                                                                                                                    | 6.43916 | down | 6.17508  | down | 14.01389   | 93.43751    | 12.81305   | 69.76872    | Compromised | Detected | Compromised | Detected    |
| 4707 | A_33_P3271652 | HHIPL1    | Hs.288522 | HHIP-like 1                                                                                                                                                        | 6.43487 | down | 5.92764  | down | 6.16106    | 41.05143    | 6.16175    | 32.20711    | Compromised | Detected | Compromised | Detected    |
| 4708 | A_23_P307502  | C9orf53   | Hs.721053 | chromosome 9 open reading frame 53                                                                                                                                 | 6.42634 | down | 4.88934  | down | 80.93403   | 538.55200   | 33.38379   | 143.92998   | Detected    | Detected | Detected    | Detected    |
| 4709 | A_33_P3258392 | EDN1      | Hs.511899 | endothelin 1                                                                                                                                                       | 6.41764 | down | 6.37495  | down | 33.26720   | 221.06725   | 39.43983   | 221.70598   | Detected    | Detected | Detected    | Detected    |
| 4710 | A_33_P3423445 | ZNF730    | Hs.720743 | zinc finger protein 730                                                                                                                                            | 6.41354 | down | 3.04603  | down | 4.77951    | 31.74057    | 5.36864    | 14.41995    | Compromised | Detected | Compromised | Compromised |
| 4711 | A_23_P114314  | CDX4      | Hs.553488 | caudal type homeobox 4                                                                                                                                             | 6.40196 | down | 1.29688  | down | 3.31210    | 21.95581    | 3.10158    | 3.54689     | Compromised | Detected | Compromised | Compromised |
| 4712 | A_33_P3248519 | SMC4      | Hs.58992  | structural maintenance of chromosomes 4                                                                                                                            | 6.37328 | down | 5.67414  | down | 757.89760  | 5000.25000  | 260.09982  | 1301.38390  | Detected    | Detected | Detected    | Detected    |
| 4713 | A_23_P61778   | NXN       | Hs.527989 | nucleoredoxin                                                                                                                                                      | 6.37239 | down | 7.84752  | down | 87.37985   | 576.56256   | 73.49689   | 508.58865   | Detected    | Detected | Detected    | Detected    |
| 4714 | A_23_P75071   | KIF20B    | Hs.240    | kinesin family member 20B                                                                                                                                          | 6.35264 | down | 6.23597  | down | 83.81862   | 551.35046   | 54.67972   | 300.67386   | Detected    | Detected | Detected    | Detected    |
| 4715 | A_33_P3411975 | ABI3BP    | Hs.477015 | ABI family, member 3 (NESH) binding protein                                                                                                                        | 6.34443 | down | 5.73243  | down | 8.09117    | 53.15412    | 10.41645   | 52.65311    | Compromised | Detected | Compromised | Detected    |
| 4716 | A_23_P80008   | MYLK2     | Hs.86092  | myosin light chain kinase 2                                                                                                                                        | 6.33257 | down | 8.81233  | down | 34.62186   | 227.01952   | 25.14067   | 195.35875   | Detected    | Detected | Detected    | Detected    |
| 4717 | A_23_P102058  | MATN3     | Hs.656199 | matrilin 3                                                                                                                                                         | 6.33141 | down | 5.53635  | down | 15.85547   | 103.94723   | 5.30359    | 25.89163    | Detected    | Detected | Compromised | Detected    |
| 4718 | A_23_P5392    | TP53I3    | Hs.50649  | tumor protein p53 inducible protein 3                                                                                                                              | 6.30961 | down | 6.43718  | down | 1282.72660 | 8380.50100  | 1145.63820 | 6502.92040  | Detected    | Detected | Detected    | Detected    |
| 4719 | A_32_P204722  |           |           |                                                                                                                                                                    | 6.28440 | down | 6.17052  | down | 40.74204   | 285.54025   | 36.00147   | 195.88770   | Detected    | Detected | Detected    | Detected    |
| 4720 | A_23_P131935  | FERMT1    | Hs.472054 | fermitin family homolog 1 (Drosophila)                                                                                                                             | 6.27021 | down | 6.41588  | down | 101.83689  | 661.18050   | 72.09717   | 407.88727   | Detected    | Detected | Detected    | Detected    |
| 4721 | A_24_P12626   | CAV1      | Hs.74034  | caveolin 1, caveolae protein, 22kDa                                                                                                                                | 6.26745 | down | 5.91353  | down | 4745.63700 | 30797.69700 | 4460.15200 | 23257.43800 | Detected    | Detected | Detected    | Detected    |
| 4722 | A_23_P70307   | SMOC2     | Hs.487200 | SPARC related modular calcium binding 2                                                                                                                            | 6.25438 | down | 1.57505  | down | 5.30047    | 34.32664    | 2.85926    | 3.97113     | Compromised | Detected | Compromised | Compromised |
| 4723 | A_24_P91991   | NAT8L     | Hs.318529 | N-acetyltransferase 8-like (GCN5-related, putative)                                                                                                                | 6.24982 | down | 16.65014 | down | 10.40015   | 67.30389    | 2.79228    | 40.99614    | Compromised | Detected | Compromised | Detected    |
| 4724 | A_33_P3403075 | PRR11     | Hs.631750 | proline rich 11                                                                                                                                                    | 6.24341 | down | 8.06314  | down | 55.24514   | 357.14868   | 48.84374   | 347.27890   | Detected    | Detected | Detected    | Detected    |
| 4725 | A_33_P3362503 | ISPD      | Hs.636502 | isoprenoid synthase domain containing                                                                                                                              | 6.23562 | down | 7.03611  | down | 4.70097    | 30.35291    | 4.87257    | 30.23124    | Compromised | Detected | Compromised | Detected    |

|      |               |           |           |                                                                  |                                                                                                                                           |         |      |          |      |            |             |            |             |             |          |             |             |
|------|---------------|-----------|-----------|------------------------------------------------------------------|-------------------------------------------------------------------------------------------------------------------------------------------|---------|------|----------|------|------------|-------------|------------|-------------|-------------|----------|-------------|-------------|
| 4726 | A_24_P381199  | TRIM6     | Hs.125300 | tripartite motif-containing 6                                    | Homo sapiens tripartite motif-containing 6 (TRIM6), transcript variant 1, mRNA [NM_001003818]                                             | 6.23017 | down | 5.24199  | down | 90.76167   | 585.51120   | 57.89333   | 267.60248   | Detected    | Detected | Detected    | Detected    |
| 4727 | A_24_P931443  | GPR68     | Hs.8882   | G protein-coupled receptor 68                                    | Homo sapiens G protein-coupled receptor 68 (GPR68), mRNA [NM_003485]                                                                      | 6.22946 | down | 5.97594  | down | 5417.59100 | 34945.36300 | 4146.32960 | 21849.20000 | Detected    | Detected | Detected    | Detected    |
| 4728 | A_33_P3365142 | GAD1      | Hs.420036 | glutamate decarboxylase 1 (brain, 67kDa)                         | Homo sapiens glutamate decarboxylase 1 (brain, 67kDa) (GAD1), transcript variant GAD25, mRNA [NM_013445]                                  | 6.22926 | down | 5.26566  | down | 20.15288   | 129.98892   | 22.21679   | 103.15723   | Detected    | Detected | Detected    | Detected    |
| 4729 | A_33_P3629678 | COL5A1    | Hs.210283 | collagen, type V, alpha 1                                        | Homo sapiens collagen, type V, alpha 1 (COL5A1), mRNA [NM_000093]                                                                         | 6.22120 | down | 6.42459  | down | 5086.14840 | 32763.95000 | 4598.97950 | 26053.86000 | Detected    | Detected | Detected    | Detected    |
| 4730 | A_23_P111995  | LOXL2     | Hs.626637 | lysyl oxidase-like 2                                             | Homo sapiens lysyl oxidase-like 2 (LOXL2), mRNA [NM_002318]                                                                               | 6.20669 | down | 6.68828  | down | 9818.66100 | 63102.42600 | 6884.45360 | 40602.16400 | Detected    | Detected | Detected    | Detected    |
| 4731 | A_33_P3285260 |           |           |                                                                  | ES1 protein homolog, mitochondrial Precursor (Protein KNP-1)(Protein GT335) [Source:UniProtKB/Swiss-Prot;Acc:P30042] [ENST00000389690]    | 6.20157 | down | 7.06232  | down | 310.96844  | 1996.87410  | 265.62155  | 1654.15450  | Detected    | Detected | Detected    | Detected    |
| 4732 | A_24_P146211  | HIST1H2BD | Hs.591797 | histone cluster 1, H2bd                                          | Homo sapiens histone cluster 1, H2bd (HIST1H2BD), transcript variant 1, mRNA [NM_021053]                                                  | 6.17541 | down | 4.28253  | down | 107.42239  | 686.89984   | 140.44548  | 530.36310   | Detected    | Detected | Detected    | Detected    |
| 4733 | A_33_P3244249 |           |           |                                                                  | SH3 domain and tetratricopeptide repeats-containing protein 2 [Source:UniProtKB/Swiss-Prot;Acc:Q8TF17] [ENST00000394358]                  | 6.17405 | down | 8.33459  | down | 6.70742    | 42.88037    | 5.22224    | 38.38015    | Compromised | Detected | Compromised | Detected    |
| 4734 | A_23_P252740  | DSCC1     | Hs.315167 | defective in sister chromatid cohesion 1 homolog (S. cerevisiae) | Homo sapiens defective in sister chromatid cohesion 1 homolog (S. cerevisiae) (DSCC1), mRNA [NM_024094]                                   | 6.16602 | down | 6.28356  | down | 48.38689   | 308.93390   | 35.22436   | 195.17061   | Detected    | Detected | Detected    | Detected    |
| 4735 | A_33_P3415551 | GPAT2     | Hs.348629 | glycerol-3-phosphate acyltransferase 2, mitochondrial            | Homo sapiens glycerol-3-phosphate acyltransferase 2, mitochondrial (GPAT2), nuclear gene encoding mitochondrial protein, mRNA [NM_207328] | 6.16546 | down | 6.58190  | down | 348.43805  | 2224.45750  | 329.21090  | 1910.69310  | Detected    | Detected | Detected    | Detected    |
| 4736 | A_24_P833129  | ISPD      | Hs.636502 | isoprenoid synthase domain containing                            | Homo sapiens isoprenoid synthase domain containing (ISPD), transcript variant 1, mRNA [NM_001101426]                                      | 6.15976 | down | 3.01159  | down | 5.39254    | 34.39461    | 4.28294    | 11.37374    | Compromised | Detected | Compromised | Compromised |
| 4737 | A_24_P339429  | KCNJ12    | Hs.200629 | potassium inwardly-rectifying channel, subfamily J, member 12    | Homo sapiens potassium inwardly-rectifying channel, subfamily J, member 12 (KCNJ12), mRNA [NM_021012]                                     | 6.14777 | down | 9.17641  | down | 20.63278   | 131.34341   | 9.33069    | 75.50088    | Detected    | Detected | Compromised | Detected    |
| 4738 | A_23_P23669   | PALMD     | Hs.483993 | palmelphin                                                       | Homo sapiens palmelphin (PALMD), mRNA [NM_017734]                                                                                         | 6.13152 | down | 5.80493  | down | 26.10146   | 165.71666   | 21.52662   | 110.18900   | Detected    | Detected | Detected    | Detected    |
| 4739 | A_23_P118254  | FOXF1     | Hs.155591 | forkhead box F1                                                  | Homo sapiens forkhead box F1 (FOXF1), mRNA [NM_001451]                                                                                    | 6.12883 | down | 6.76577  | down | 79.43672   | 504.11752   | 46.29013   | 276.16678   | Detected    | Detected | Detected    | Detected    |
| 4740 | A_23_P101054  | KRT34     | Hs.296942 | keratin 34                                                       | Homo sapiens keratin 34 (KRT34), mRNA [NM_021013]                                                                                         | 6.10260 | down | 6.35309  | down | 149.22154  | 942.93024   | 145.92633  | 817.49384   | Detected    | Detected | Detected    | Detected    |
| 4741 | A_33_P3250438 |           |           |                                                                  | UPF0608 protein C19orf42 Precursor [Source:UniProtKB/Swiss-Prot;Acc:Q9BQ49] [ENST00000358726]                                             | 6.07843 | down | 5.32833  | down | 152.76082  | 961.47170   | 159.04251  | 747.25653   | Detected    | Detected | Detected    | Detected    |
| 4742 | A_33_P3259092 | FKTN      | Hs.55777  | fukutin                                                          | Homo sapiens fukutin (FKTN), transcript variant 1, mRNA [NM_001079802]                                                                    | 6.07569 | down | 2.92025  | down | 3.36455    | 21.16682    | 6.40561    | 16.49477    | Compromised | Detected | Compromised | Compromised |
| 4743 | A_33_P3262635 | CECR1     | Hs.170310 | cat eye syndrome chromosome region, candidate 1                  | Homo sapiens cat eye syndrome chromosome region, candidate 1 (CECR1), transcript variant 2, mRNA [NM_177405]                              | 6.06742 | down | 6.22061  | down | 21.22471   | 133.34567   | 21.67738   | 118.90632   | Detected    | Detected | Detected    | Detected    |
| 4744 | A_24_P394075  | NT5C1B    | Hs.120319 | 5'-nucleotidase, cytosolic 1B                                    | Homo sapiens 5'-nucleotidase, cytosolic 1B (NT5C1B), transcript variant 1, mRNA [NM_001020066]                                            | 6.06729 | down | 2.79241  | down | 2.71338    | 17.04660    | 2.72467    | 6.70899     | Compromised | Detected | Compromised | Compromised |
| 4745 | A_23_P160537  | C1orf135  | Hs.149305 | chromosome 1 open reading frame 135                              | Homo sapiens chromosome 1 open reading frame 135 (C1orf135), mRNA [NM_024037]                                                             | 6.06211 | down | 6.05796  | down | 145.76831  | 914.98850   | 108.06578  | 577.27110   | Detected    | Detected | Detected    | Detected    |
| 4746 | A_23_P146134  | DUSP26    | Hs.8719   | dual specificity phosphatase 26 (putative)                       | Homo sapiens dual specificity phosphatase 26 (putative) (DUSP26), mRNA [NM_024025]                                                        | 6.05571 | down | 12.48702 | down | 14.09547   | 88.38480    | 9.97060    | 109.78570   | Detected    | Detected | Compromised | Detected    |
| 4747 | A_23_P1819    | OR8B8     | Hs.351822 | olfactory receptor, family 8, subfamily B, member 8              | Homo sapiens olfactory receptor, family 8, subfamily B, member 8 (OR8B8), mRNA [NM_012378]                                                | 6.03055 | down | 8.06012  | down | 30.19206   | 188.53096   | 24.17651   | 171.83067   | Detected    | Detected | Detected    | Detected    |
| 4748 | A_23_P21976   | CSPG4     | Hs.513044 | chondroitin sulfate proteoglycan 4                               | Homo sapiens chondroitin sulfate proteoglycan 4 (CSPG4), mRNA [NM_0010597]                                                                | 6.02973 | down | 6.44415  | down | 923.86376  | 5766.92870  | 815.41490  | 4633.50730  | Detected    | Detected | Detected    | Detected    |
| 4749 | A_33_P3300262 |           | Hs.137415 |                                                                  | Vitrin Precursor [Source:UniProtKB/Swiss-Prot;Acc:G6UXI7] [ENST00000457137]                                                               | 6.02854 | down | 7.03476  | down | 16.60020   | 103.62351   | 10.76577   | 66.78207    | Detected    | Detected | Compromised | Detected    |
| 4750 | A_23_P71727   | CKS2      | Hs.83758  | CDC28 protein kinase regulatory subunit 2                        | Homo sapiens CDC28 protein kinase regulatory subunit 2 (CKS2), mRNA [NM_001827]                                                           | 6.00534 | down | 5.45346  | down | 5413.06600 | 33660.00400 | 4014.77030 | 19306.26000 | Detected    | Detected | Detected    | Detected    |
| 4751 | A_23_P141706  | TCEB3B    | Hs.375035 | transcription elongation factor B polypeptide 3B (elongin A2)    | Homo sapiens transcription elongation factor B polypeptide 3B (elongin A2) (TCEB3B), mRNA [NM_016427]                                     | 6.00044 | down | 1.18472  | down | 3.09817    | 19.24957    | 2.87890    | 3.00752     | Compromised | Detected | Compromised | Compromised |
| 4752 | A_23_P57709   | PCOLCE2   | Hs.8944   | procollagen C-endopeptidase enhancer 2                           | Homo sapiens procollagen C-endopeptidase enhancer 2 (PCOLCE2), mRNA [NM_013363]                                                           | 5.99838 | down | 6.19582  | down | 1501.87540 | 9328.27200  | 1469.41050 | 8028.00150  | Detected    | Detected | Detected    | Detected    |
| 4753 | A_32_P212897  | LOC643406 | Hs.431161 | hypothetical LOC643406                                           | Homo sapiens hypothetical LOC643406 (LOC643406), non-coding RNA [NR_029405]                                                               | 5.99736 | down | 9.68219  | down | 8.04846    | 49.98111    | 4.84814    | 41.39180    | Compromised | Detected | Compromised | Detected    |
| 4754 | A_23_P379945  | CODC8BC   | Hs.525536 | coiled-coil domain containing 88C                                | Homo sapiens coiled-coil domain containing 88C (CODC8BC), mRNA [NM_001080414]                                                             | 5.99674 | down | 8.00641  | down | 3.08286    | 19.14265    | 2.72660    | 19.24976    | Compromised | Detected | Compromised | Detected    |

|      |               |              |           |                                                                             |                                                                                                                                             |         |      |         |      |            |             |            |             |             |             |             |             |
|------|---------------|--------------|-----------|-----------------------------------------------------------------------------|---------------------------------------------------------------------------------------------------------------------------------------------|---------|------|---------|------|------------|-------------|------------|-------------|-------------|-------------|-------------|-------------|
| 4755 | A_33_P3392077 | TP53I3       | Hs.50649  | tumor protein p53 inducible protein 3                                       | Homo sapiens tumor protein p53 inducible protein 3 (TP53I3), transcript variant 1, mRNA [NM_004881]                                         | 5.98604 | down | 6.17101 | down | 2379.76640 | 14750.51200 | 2392.46040 | 13018.67400 | Detected    | Detected    | Detected    | Detected    |
| 4756 | A_23_P15844   | BRIP1        | Hs.532799 | BRCA1 interacting protein C-terminal helicase 1                             | Homo sapiens BRCA1 interacting protein C-terminal helicase 1 (BRIP1), mRNA [NM_032043]                                                      | 5.98436 | down | 5.75183 | down | 26.35240   | 163.29420   | 12.15611   | 61.65468    | Detected    | Detected    | Compromised | Detected    |
| 4757 | A_33_P3222630 | FBXO43       | Hs.339577 | F-box protein 43                                                            | Homo sapiens F-box protein 43 (FBXO43), transcript variant 1, mRNA [NM_001077526]                                                           | 5.98191 | down | 4.62938 | down | 24.23979   | 150.14178   | 24.66990   | 100.70612   | Detected    | Detected    | Detected    | Detected    |
| 4758 | A_33_P3344282 |              |           |                                                                             | HCLS1-binding protein 3 (HS1-binding protein 3) [HSP1BP-3] [Source:UniProtKB/Swiss-Prot;Acc:Q53T59] [ENST00000406616]                       | 5.97276 | down | 5.97041 | down | 41.84630   | 258.80066   | 30.82096   | 162.26150   | Detected    | Detected    | Detected    | Detected    |
| 4759 | A_33_P3402565 | DSP          | Hs.519873 | desmoplakin                                                                 | Homo sapiens desmoplakin (DSP), transcript variant 1, mRNA [NM_004415]                                                                      | 5.97262 | down | 5.94804 | down | 1600.90330 | 9900.63900  | 1302.86270 | 6833.42330  | Detected    | Detected    | Detected    | Detected    |
| 4760 | A_33_P3268472 | CTSC         | Hs.128065 | cathepsin C                                                                 | Homo sapiens cathepsin C (CTSC), transcript variant 3, mRNA [NM_001114173]                                                                  | 5.95346 | down | 5.44243 | down | 987.92615  | 6090.13670  | 969.57860  | 4653.08700  | Detected    | Detected    | Detected    | Detected    |
| 4761 | A_23_P115482  | UBE2T        | Hs.51599  | ubiquitin-conjugating enzyme E2T (putative)                                 | Homo sapiens ubiquitin-conjugating enzyme E2T (putative) (UBE2T), mRNA [NM_014176]                                                          | 5.94784 | down | 6.09248 | down | 1200.05410 | 7390.82900  | 825.05634  | 4432.43850  | Detected    | Detected    | Detected    | Detected    |
| 4762 | A_33_P3220872 | LOC1720      | Hs.169235 | dihydrofolate reductase pseudogene                                          | Human dihydrofolate reductase pseudogene (psi-hd1), [J00146]                                                                                | 5.93584 | down | 1.89521 | down | 4.96579    | 30.52133    | 2.96354    | 4.95260     | Compromised | Detected    | Compromised | Compromised |
| 4763 | A_33_P3238856 | FARP1        | Hs.403917 | FERM, RhoGEF (ARHGEF) and pleckstrin domain protein 1 (chondrocyte-derived) | Homo sapiens FERM, RhoGEF (ARHGEF) and pleckstrin domain protein 1 (chondrocyte-derived) (FARP1), transcript variant 2, mRNA [NM_001001715] | 5.92383 | down | 8.24786 | down | 12.34271   | 75.70883    | 9.31471    | 67.74480    | Compromised | Detected    | Compromised | Detected    |
| 4764 | A_23_P303671  | ECM2         | Hs.117060 | extracellular matrix protein 2, female organ and adipocyte specific         | Homo sapiens extracellular matrix protein 2, female organ and adipocyte specific (ECM2), mRNA [NM_001393]                                   | 5.91468 | down | 6.38802 | down | 28.01552   | 171.57869   | 19.85151   | 111.82150   | Detected    | Detected    | Detected    | Detected    |
| 4765 | A_23_P213228  | PHOX2B       | Hs.87202  | paired-like homeobox 2b                                                     | Homo sapiens paired-like homeobox 2b (PHOX2B), mRNA [NM_003924]                                                                             | 5.90662 | down | 1.18501 | down | 3.41934    | 20.91289    | 2.83012    | 2.95728     | Compromised | Detected    | Compromised | Compromised |
| 4766 | A_33_P3326989 | RAGE         | Hs.104119 | renal tumor antigen                                                         | Homo sapiens renal tumor antigen (RAGE), mRNA [NM_014226]                                                                                   | 5.89573 | down | 6.58951 | down | 46.27196   | 282.48074   | 43.58052   | 253.22765   | Detected    | Detected    | Detected    | Detected    |
| 4767 | A_23_P356330  | PPPDE2       | Hs.570455 | PPPDE peptidase domain containing 2                                         | Homo sapiens PPPDE peptidase domain containing 2 (PPPDE2), mRNA [NM_015704]                                                                 | 5.89187 | down | 6.88832 | down | 153.68434  | 937.59546   | 83.17181   | 505.19037   | Detected    | Detected    | Detected    | Detected    |
| 4768 | A_33_P3351851 | HIST1H4L     | Hs.533295 | histone cluster 1, H4I                                                      | Homo sapiens histone cluster 1, H4I (HIST1H4L), mRNA [NM_003546]                                                                            | 5.88893 | down | 5.86637 | down | 6.44134    | 39.27768    | 5.11999    | 26.48525    | Compromised | Detected    | Compromised | Detected    |
| 4769 | A_33_P3238815 |              |           |                                                                             | FERM domain-containing protein 5 [Source:UniProtKB/Swiss-Prot;Acc:Q7Z6J6] [ENST00000402883]                                                 | 5.87359 | down | 5.99213 | down | 14.56000   | 88.55196    | 10.16643   | 53.71743    | Detected    | Detected    | Compromised | Detected    |
| 4770 | A_23_P374844  | GAL          | Hs.278959 | galanin prepropeptide                                                       | Homo sapiens galanin prepropeptide (GAL), mRNA [NM_015973]                                                                                  | 5.86057 | down | 5.74262 | down | 1560.64470 | 9470.59300  | 1251.17200 | 6335.67240  | Detected    | Detected    | Detected    | Detected    |
| 4771 | A_24_P69053   | ODZ3         | Hs.130438 | odz, odd Oz/ten-m homolog 3 (Drosophila)                                    | Homo sapiens odz, odd Oz/ten-m homolog 3 (Drosophila) (ODZ3), mRNA [NM_001080477]                                                           | 5.85348 | down | 5.58371 | down | 50.41267   | 305.55334   | 30.27528   | 149.06538   | Detected    | Detected    | Detected    | Detected    |
| 4772 | A_33_P3387856 | CENPN        | Hs.55028  | centromere protein N                                                        | Homo sapiens centromere protein N (CENPN), transcript variant 1, mRNA [NM_001100625]                                                        | 5.84901 | down | 5.03205 | down | 18.99727   | 115.05539   | 20.83892   | 92.46666    | Detected    | Detected    | Detected    | Detected    |
| 4773 | A_33_P3330079 | LOC100128242 | Hs.651710 | similar to GRAM domain containing 1B                                        | PREDICTED: Homo sapiens similar to GRAM domain containing 1B (LOC100128242), miscRNA [XR_078445]                                            | 5.84869 | down | 6.71575 | down | 119.79380  | 725.48114   | 97.99329   | 580.30554   | Detected    | Detected    | Detected    | Detected    |
| 4774 | A_33_P3215239 | KIF20B       | Hs.240    | kinesin family member 20B                                                   | Homo sapiens kinesin family member 20B (KIF20B), mRNA [NM_016195]                                                                           | 5.84136 | down | 6.32239 | down | 101.26609  | 612.50684   | 79.09248   | 440.94220   | Detected    | Detected    | Detected    | Detected    |
| 4775 | A_23_P58009   | C3orf52      | Hs.434247 | chromosome 3 open reading frame 52                                          | Homo sapiens chromosome 3 open reading frame 52 (C3orf52), mRNA [NM_024616]                                                                 | 5.84061 | down | 5.63324 | down | 161.91531  | 979.21770   | 117.84353  | 585.36920   | Detected    | Detected    | Detected    | Detected    |
| 4776 | A_32_P160563  | OPCML        | Hs.4817   | opioid binding protein/cell adhesion molecule-like                          | Homo sapiens opioid binding protein/cell adhesion molecule-like (OPCML), transcript variant 2, mRNA [NM_001012393]                          | 5.82656 | down | 7.06456 | down | 2.37851    | 14.34993    | 2.56447    | 15.97528    | Compromised | Compromised | Compromised | Detected    |
| 4777 | A_33_P3400477 | STIL         | Hs.525198 | SCL/TAL1 interrupting locus                                                 | Homo sapiens SCL/TAL1 interrupting locus (STIL), transcript variant 1, mRNA [NM_001048166]                                                  | 5.80731 | down | 7.81219 | down | 73.38251   | 441.26645   | 36.21799   | 249.49544   | Detected    | Detected    | Detected    | Detected    |
| 4778 | A_23_P309973  | C14orf50     | Hs.144696 | chromosome 14 open reading frame 50                                         | Homo sapiens chromosome 14 open reading frame 50 (C14orf50), mRNA [NM_172365]                                                               | 5.80267 | down | 2.08938 | down | 3.39521    | 20.39990    | 5.79705    | 10.68047    | Compromised | Detected    | Compromised | Compromised |
| 4779 | A_23_P215060  | PODXL        | Hs.16426  | podocalyxin-like                                                            | Homo sapiens podocalyxin-like (PODXL), transcript variant 1, mRNA [NM_001018111]                                                            | 5.80112 | down | 5.34879 | down | 8632.86900 | 51856.15600 | 7474.39790 | 35253.09000 | Detected    | Detected    | Detected    | Detected    |
| 4780 | A_23_P319859  | EYA2         | Hs.472877 | eyes absent homolog 2 (Drosophila)                                          | Homo sapiens eyes absent homolog 2 (Drosophila) (EYA2), transcript variant 1, mRNA [NM_005244]                                              | 5.80058 | down | 4.25633 | down | 31.42043   | 188.71936   | 22.63615   | 84.95781    | Detected    | Detected    | Detected    | Detected    |
| 4781 | A_23_P104438  | MYPN         | Hs.55205  | myopalladin                                                                 | Homo sapiens myopalladin (MYPN), mRNA [NM_032578]                                                                                           | 5.79883 | down | 5.68165 | down | 61.96690   | 372.07748   | 46.03132   | 230.61809   | Detected    | Detected    | Detected    | Detected    |
| 4782 | A_23_P417113  |              |           |                                                                             | RNA-binding protein 33 (RNA-binding motif protein 33)(Proline-rich protein 8) [Source:UniProtKB/Swiss-Prot;Acc:Q96EV2] [ENST00000287912]    | 5.79511 | down | 5.02111 | down | 128.72472  | 772.42560   | 100.11581  | 443.26965   | Detected    | Detected    | Detected    | Detected    |
| 4783 | A_33_P3282018 | MCF2L        | Hs.170422 | MCF.2 cell line derived transforming sequence-like                          | Homo sapiens MCF.2 cell line derived transforming sequence-like (MCF2L), transcript variant 2, mRNA [NM_024979]                             | 5.79465 | down | 1.29674 | down | 12.28276   | 73.69808    | 4.83585    | 5.52957     | Detected    | Detected    | Compromised | Compromised |
| 4784 | A_23_P53588   | WNT5B        | Hs.306051 | wingless-type MMTV integration site family, member 5B                       | Homo sapiens wingless-type MMTV integration site family, member 5B (WNT5B), transcript variant 2, mRNA [NM_030775]                          | 5.79008 | down | 6.48828 | down | 1831.00240 | 10977.57400 | 2779.46920 | 15897.28100 | Detected    | Detected    | Detected    | Detected    |



|      |               |              |           |                                                                   |                                                                                                                             |         |      |          |      |             |              |             |              |             |              |             |              |
|------|---------------|--------------|-----------|-------------------------------------------------------------------|-----------------------------------------------------------------------------------------------------------------------------|---------|------|----------|------|-------------|--------------|-------------|--------------|-------------|--------------|-------------|--------------|
| 4785 | A_33_P3334419 | RPS6KL1      | Hs.414481 | ribosomal protein S6 kinase-like 1                                | Homo sapiens ribosomal protein S6 kinase-like 1 (RPS6KL1), mRNA [NM_031464]                                                 | 5.78296 | down | 4.64186  | down | 13.14710    | 78.72505     | 11.52220    | 47.16211     | Compromised | Detected     | Compromised | Detected     |
| 4786 | A_23_P250516  |              |           |                                                                   |                                                                                                                             | 5.77991 | down | 14.91649 | down | 18.05566    | 108.06067    | 5.26174     | 69.20882     | Detected    | Detected     | Compromised | Detected     |
| 4787 | A_23_P397293  | LY6K         | Hs.69517  | lymphocyte antigen 6 complex, locus K                             | Homo sapiens lymphocyte antigen 6 complex, locus K (LY6K), transcript variant 1, mRNA [NM_017527]                           | 5.77675 | down | 5.75883  | down | 8178.64600  | 48921.34800  | 8288.28600  | 42088.58000  | Detected    | Detected     | Detected    | Detected     |
| 4788 | A_33_P3283833 | FOXS1        | Hs.516971 | forkhead box S1                                                   | Homo sapiens forkhead box S1 (FOXS1), mRNA [NM_004118]                                                                      | 5.73741 | down | 6.14674  | down | 36.19764    | 215.04498    | 27.02568    | 146.48302    | Detected    | Detected     | Detected    | Detected     |
| 4789 | A_33_P3405103 | FLYWCH1      | Hs.655321 | FLYWCH-type zinc finger 1                                         | Homo sapiens FLYWCH-type zinc finger 1 (FLYWCH1), transcript variant 2, mRNA [NM_020912]                                    | 5.72716 | down | 5.75964  | down | 66.56827    | 394.76578    | 46.19363    | 234.60814    | Detected    | Detected     | Detected    | Detected     |
| 4790 | A_24_P48723   | PTGIS        | Hs.302085 | prostaglandin I2 (prostacyclin) synthase                          | Homo sapiens prostaglandin I2 (prostacyclin) synthase (PTGIS), mRNA [NM_000961]                                             | 5.72539 | down | 5.92772  | down | 225.35703   | 1336.00780   | 113.96143   | 595.67750    | Detected    | Detected     | Detected    | Detected     |
| 4791 | A_33_P3584591 | HIST2H2BA    | Hs.585427 | histone cluster 2, H2ba                                           | AGENECOURT_8230913<br>Lupski_dorsal_root_ganglion Homo sapiens cDNA clone IMAGE:6182568 5', mRNA sequence [BQ890825]        | 5.71544 | down | 1.18419  | down | 4.37379     | 25.88455     | 2.86167     | 2.98817      | Compromised | Detected     | Compromised | Compromised  |
| 4792 | A_23_P17593   | CDH4         | Hs.473231 | cadherin 4, type 1, R-cadherin (retinal)                          | Homo sapiens cadherin 4, type 1, R-cadherin (retinal) (CDH4), mRNA [NM_001794]                                              | 5.69731 | down | 6.37063  | down | 134.48900   | 793.39480    | 119.07429   | 668.90670    | Detected    | Detected     | Detected    | Detected     |
| 4793 | A_32_P170481  | LOC100240735 | Hs.635297 | hypothetical LOC100240735                                         | Homo sapiens hypothetical LOC100240735 (LOC100240735), non-coding RNA [NR_026658]                                           | 5.68053 | down | 5.19994  | down | 15.33198    | 90.18204     | 9.26442     | 42.47976     | Detected    | Detected     | Compromised | Detected     |
| 4794 | A_33_P3608210 | LOC554202    | Hs.458096 | hypothetical LOC554202                                            | Homo sapiens hypothetical LOC554202 (LOC554202), non-coding RNA [NR_027054]                                                 | 5.67599 | down | 5.99245  | down | 360.81970   | 2120.62940   | 257.64470   | 1361.41800   | Detected    | Detected     | Detected    | Detected     |
| 4795 | A_23_P156880  | ENPP1        | Hs.527295 | ectonucleotide pyrophosphatase/phosphodiesterase 1                | Homo sapiens ectonucleotide pyrophosphatase/phosphodiesterase 1 (ENPP1), mRNA [NM_006208]                                   | 5.66536 | down | 6.13000  | down | 520.16660   | 3051.42580   | 456.53460   | 2467.74100   | Detected    | Detected     | Detected    | Detected     |
| 4796 | A_23_P156327  | TGFB1        | Hs.369397 | transforming growth factor, beta-induced, 68kDa                   | Homo sapiens transforming growth factor, beta-induced, 68kDa (TGFB1), mRNA [NM_000358]                                      | 5.65901 | down | 4.78089  | down | 73874.69000 | 432881.84000 | 54878.18400 | 231352.42000 | Detected    | Detected     | Detected    | Detected     |
| 4797 | A_23_P115200  | FCRL4        | Hs.120260 | Fc receptor-like 4                                                | Homo sapiens Fc receptor-like 4 (FCRL4), mRNA [NM_031282]                                                                   | 5.65804 | down | 8.52748  | down | 3.74802     | 21.95841     | 3.44157     | 25.87869     | Compromised | Not Detected | Compromised | Not Detected |
| 4798 | A_23_P88630   | BLM          | Hs.169348 | Bloom syndrome, RecQ helicase-like                                | Homo sapiens Bloom syndrome, RecQ helicase-like (BLM), mRNA [NM_000057]                                                     | 5.65731 | down | 5.49223  | down | 270.38705   | 1583.90440   | 193.43558   | 936.80804    | Detected    | Detected     | Detected    | Detected     |
| 4799 | A_23_P205789  | GABPB1       | Hs.654350 | GA binding protein transcription factor, beta subunit 1           | Homo sapiens GA binding protein transcription factor, beta subunit 1 (GABPB1), transcript variant gamma-1, mRNA [NM_002041] | 5.64315 | down | 5.97990  | down | 259.79720   | 1518.06000   | 249.01811   | 1313.07730   | Detected    | Detected     | Detected    | Detected     |
| 4800 | A_24_P945000  | SKA2         | Hs.463607 | spindle and kinetochore associated complex subunit 2              | Homo sapiens spindle and kinetochore associated complex subunit 2 (SKA2), transcript variant 1, mRNA [NM_182820]            | 5.64260 | down | 5.04924  | down | 222.10886   | 1297.71150   | 147.53517   | 656.88196    | Detected    | Detected     | Detected    | Detected     |
| 4801 | A_33_P3271470 | GREB1L       | Hs.149020 | growth regulation by estrogen in breast cancer-like               | Homo sapiens growth regulation by estrogen in breast cancer-like (GREB1L), mRNA [NM_001142966]                              | 5.64189 | down | 7.50632  | down | 4.37835     | 25.57806     | 3.25463     | 21.54242     | Compromised | Detected     | Compromised | Detected     |
| 4802 | A_23_P214168  | COL12A1      | Hs.101302 | collagen, type XII, alpha 1                                       | Homo sapiens collagen, type XII, alpha 1 (COL12A1), transcript variant long, mRNA [NM_004370]                               | 5.63714 | down | 5.28042  | down | 1915.52160  | 11180.96600  | 1511.68230  | 7038.72950   | Detected    | Detected     | Detected    | Detected     |
| 4803 | A_23_P170213  | NKAIN2       | Hs.656604 | Na <sup>+</sup> /K <sup>+</sup> transporting ATPase interacting 2 | Homo sapiens Na <sup>+</sup> /K <sup>+</sup> transporting ATPase interacting 2 (NKAIN2), mRNA [NM_001040214]                | 5.63265 | down | 1.33815  | down | 5.56543     | 32.45965     | 4.27244     | 5.04132      | Compromised | Detected     | Compromised | Compromised  |
| 4804 | A_24_P251599  | CAV3         | Hs.98303  | caveolin 3                                                        | Homo sapiens caveolin 3 (CAV3), transcript variant 2, mRNA [NM_001234]                                                      | 5.63260 | down | 4.01114  | down | 1368.57420  | 7981.97560   | 66.90283    | 236.63434    | Detected    | Detected     | Detected    | Detected     |
| 4805 | A_23_P54996   | TEX14        | Hs.390221 | testis expressed 14                                               | Homo sapiens testis expressed 14 (TEX14), transcript variant 1, mRNA [NM_198393]                                            | 5.59169 | down | 6.08412  | down | 11.13445    | 64.46807     | 3.41842     | 18.33954     | Compromised | Detected     | Compromised | Detected     |
| 4806 | A_24_P181295  | C14orf37     | Hs.535420 | chromosome 14 open reading frame 37                               | Homo sapiens chromosome 14 open reading frame 37 (C14orf37), mRNA [NM_001001872]                                            | 5.58625 | down | 6.49878  | down | 62.33652    | 360.57507    | 47.69210    | 273.30246    | Detected    | Detected     | Detected    | Detected     |
| 4807 | A_23_P122216  | LOX          | Hs.102267 | lysyl oxidase                                                     | Homo sapiens lysyl oxidase (LOX), mRNA [NM_002317]                                                                          | 5.57305 | down | 5.64443  | down | 6056.68600  | 34951.09400  | 5062.68160  | 25198.01200  | Detected    | Detected     | Detected    | Detected     |
| 4808 | A_33_P3423631 | WHSC1        | Hs.113876 | Wolf-Hirschhorn syndrome candidate 1                              | Homo sapiens Wolf-Hirschhorn syndrome candidate 1 (WHSC1), transcript variant 8, mRNA [NM_007331]                           | 5.55611 | down | 4.84574  | down | 85.14700    | 489.86136    | 123.90369   | 529.43170    | Detected    | Detected     | Detected    | Detected     |
| 4809 | A_23_P12643   | AS3MT        | Hs.720370 | arsenic (+3 oxidation state) methyltransferase                    | Homo sapiens arsenic (+3 oxidation state) methyltransferase (AS3MT), mRNA [NM_020682]                                       | 5.55596 | down | 6.45677  | down | 2.38905     | 13.74415     | 2.55687     | 14.55758     | Compromised | Compromised  | Compromised | Detected     |
| 4810 | A_33_P3347971 | TPD52        | Hs.368433 | tumor protein D52                                                 | Homo sapiens tumor protein D52 (TPD52), transcript variant 1, mRNA [NM_001025252]                                           | 5.54964 | down | 5.13817  | down | 6.19899     | 35.62203     | 3.33770     | 17.11112     | Compromised | Detected     | Compromised | Compromised  |
| 4811 | A_23_P218858  | ABI3BP       | Hs.477015 | ABI family, member 3 (NESH) binding protein                       | Homo sapiens ABI family, member 3 (NESH) binding protein (ABI3BP), mRNA [NM_015429]                                         | 5.54777 | down | 5.89446  | down | 238.96527   | 1372.73300   | 115.89896   | 602.40564    | Detected    | Detected     | Detected    | Detected     |
| 4812 | A_23_P53276   | TIMELESS     | Hs.118631 | timeless homolog (Drosophila)                                     | Homo sapiens timeless homolog (Drosophila) (TIMELESS), mRNA [NM_003920]                                                     | 5.54338 | down | 5.37356  | down | 1799.55690  | 10329.36600  | 1222.47600  | 5792.52700   | Detected    | Detected     | Detected    | Detected     |
| 4813 | A_23_P342108  | CCDC116      | Hs.131615 | coiled-coil domain containing 116                                 | Homo sapiens coiled-coil domain containing 116 (CCDC116), mRNA [NM_152612]                                                  | 5.54271 | down | 6.55883  | down | 8.67550     | 49.79090     | 9.25787     | 53.54308     | Compromised | Detected     | Compromised | Detected     |
| 4814 | A_32_P34138   | FAM25A       | Hs.511787 | family with sequence similarity 25, member A                      | Homo sapiens family with sequence similarity 25, member A (FAM25A), mRNA [NM_001146157]                                     | 5.53843 | down | 4.13207  | down | 11.56992    | 66.35140     | 13.27961    | 48.38582     | Compromised | Detected     | Compromised | Detected     |
| 4815 | A_33_P3244643 | FAM183A      | Hs.657614 | family with sequence similarity 183, member A                     | Homo sapiens family with sequence similarity 183, member A (FAM183A), mRNA [NM_001101378]                                   | 5.53384 | down | 5.87799  | down | 3.18328     | 18.24042     | 4.01155     | 20.79246     | Compromised | Compromised  | Compromised | Detected     |

|      |               |              |           |                                                                                    |                                                                                                                                                  |         |      |          |      |            |             |            |             |             |             |             |             |
|------|---------------|--------------|-----------|------------------------------------------------------------------------------------|--------------------------------------------------------------------------------------------------------------------------------------------------|---------|------|----------|------|------------|-------------|------------|-------------|-------------|-------------|-------------|-------------|
| 4816 | A_23_P305245  | LOC401097    | Hs.710781 | Similar to LOC166075                                                               | LOC401097 protein Fragment [Source:UniProtKB/TrEMBL;Acc:Q8N5S4] [ENST0000326474]                                                                 | 5.51124 | down | 3.41983  | down | 3.18542    | 18.17814    | 2.79508    | 8.42875     | Compromised | Detected    | Compromised | Compromised |
| 4817 | A_33_P3247151 | LOC100288900 | Hs.711983 | hypothetical protein LOC100288900                                                  | PREDICTED: Homo sapiens hypothetical protein LOC100288900 (LOC100288900), mRNA [XM_002343731]                                                    | 5.50365 | down | 6.16395  | down | 2.89772    | 16.51358    | 3.25969    | 17.71742    | Compromised | Compromised | Compromised | Detected    |
| 4818 | A_24_P44462   | TPM1         | Hs.133892 | tropomyosin 1 (alpha)                                                              | Homo sapiens tropomyosin 1 (alpha) (TPM1), transcript variant 5, mRNA [NM_000366]                                                                | 5.47481 | down | 5.46019  | down | 4032.30830 | 22858.92200 | 3529.32890 | 16992.80300 | Detected    | Detected    | Detected    | Detected    |
| 4819 | A_32_P84242   | FAM169A      | Hs.91662  | family with sequence similarity 169, member A                                      | Homo sapiens family with sequence similarity 169, member A (FAM169A), mRNA [NM_015566]                                                           | 5.47185 | down | 4.79141  | down | 7.95284    | 45.05978    | 7.23377    | 30.56281    | Compromised | Detected    | Compromised | Detected    |
| 4820 | A_33_P3325808 | tcag7.1058   |           | hypothetical protein LOC100130187                                                  | PREDICTED: Homo sapiens hypothetical protein LOC100130187 (LOC100130187), mRNA [XM_001723171]                                                    | 5.46908 | down | 4.62343  | down | 411.18594  | 2328.55130  | 67.83411   | 276.55260   | Detected    | Detected    | Detected    | Detected    |
| 4821 | A_32_P157945  | DSP          | Hs.519873 | desmoplakin                                                                        | Homo sapiens desmoplakin (DSP), transcript variant 1, mRNA [NM_004415]                                                                           | 5.45225 | down | 5.78343  | down | 7540.03660 | 42567.88000 | 4960.26400 | 25296.22700 | Detected    | Detected    | Detected    | Detected    |
| 4822 | A_23_P16944   | SDC1         | Hs.224607 | syndecan 1                                                                         | Homo sapiens syndecan 1 (SDC1), transcript variant 1, mRNA [NM_001006946]                                                                        | 5.44746 | down | 6.25355  | down | 832.13790  | 4693.77600  | 780.44305  | 4303.61400  | Detected    | Detected    | Detected    | Detected    |
| 4823 | A_23_P432598  | CHMP4C       | Hs.183861 | chromatin modifying protein 4C                                                     | Homo sapiens chromatin modifying protein 4C (CHMP4C), mRNA [NM_152284]                                                                           | 5.44172 | down | 11.29031 | down | 2.39680    | 13.50519    | 4.13606    | 41.17736    | Compromised | Compromised | Compromised | Detected    |
| 4824 | A_33_P3229246 | HIST2H2BE    | Hs.2178   | histone cluster 2, H2be                                                            | Homo sapiens histone cluster 2, H2be (HIST2H2BE), mRNA [NM_003528]                                                                               | 5.43989 | down | 3.34009  | down | 5.17327    | 29.13987    | 11.10427   | 32.70495    | Compromised | Detected    | Compromised | Detected    |
| 4825 | A_23_P205713  | STXBP6       | Hs.508958 | syntaxin binding protein 6 (amisyn)                                                | Homo sapiens syntaxin binding protein 6 (amisyn) (STXBP6), mRNA [NM_014176]                                                                      | 5.43054 | down | 5.19837  | down | 327.07797  | 1839.19190  | 330.35210  | 1514.29160  | Detected    | Detected    | Detected    | Detected    |
| 4826 | A_32_P197524  | EIF2A        | Hs.655782 | eukaryotic translation initiation factor 2A, 65kDa                                 | Homo sapiens eukaryotic translation initiation factor 2A, 65kDa (EIF2A), mRNA [NM_032025]                                                        | 5.42694 | down | 8.16317  | down | 15.03625   | 84.49441    | 6.46038    | 46.50312    | Detected    | Detected    | Compromised | Detected    |
| 4827 | A_33_P3335966 | TPM1         | Hs.133892 | tropomyosin 1 (alpha)                                                              | Homo sapiens tropomyosin 1 (alpha) (TPM1), transcript variant 1, mRNA [NM_001018005]                                                             | 5.42583 | down | 5.74398  | down | 7805.83350 | 43854.98000 | 7258.56700 | 36764.53500 | Detected    | Detected    | Detected    | Detected    |
| 4828 | A_32_P206698  | CKS1B        | Hs.374378 | CDC28 protein kinase regulatory subunit 1B                                         | Homo sapiens CDC28 protein kinase regulatory subunit 1B (CKS1B), transcript variant 1, mRNA [NM_001926]                                          | 5.42467 | down | 5.07312  | down | 710.91473  | 3993.22300  | 720.51780  | 3223.18460  | Detected    | Detected    | Detected    | Detected    |
| 4829 | A_32_P181222  | KCNMA1       | Hs.144795 | potassium large conductance calcium-activated channel, subfamily M, alpha member 1 | Homo sapiens potassium large conductance calcium-activated channel, subfamily M, alpha member 1 (KCNMA1), transcript variant 2, mRNA [NM_002247] | 5.40316 | down | 4.31213  | down | 35.13869   | 196.59216   | 43.77952   | 166.46692   | Detected    | Detected    | Detected    | Detected    |
| 4830 | A_33_P3414964 | PTPRS        | Hs.644384 | protein tyrosine phosphatase, receptor type, S                                     | Homo sapiens protein tyrosine phosphatase, receptor type, S, mRNA cDNA clone IMAGE:5272670, complete cds. [BC029456]                             | 5.39559 | down | 7.99007  | down | 76.01405   | 424.68390   | 44.96117   | 316.77713   | Detected    | Detected    | Detected    | Detected    |
| 4831 | A_23_P143994  | FANCD2       | Hs.208388 | Fanconi anemia, complementation group D2                                           | Homo sapiens Fanconi anemia complementation group D2 (FANCD2), transcript variant 2, mRNA [NM_001018115]                                         | 5.39188 | down | 6.16581  | down | 53.44329   | 298.37790   | 41.35175   | 224.82770   | Detected    | Detected    | Detected    | Detected    |
| 4832 | A_33_P3390017 | C15orf54     | Hs.376109 | chromosome 15 open reading frame 54                                                | Homo sapiens chromosome 15 open reading frame 54 (C15orf54), mRNA [NM_207445]                                                                    | 5.38802 | down | 9.20235  | down | 15.57670   | 86.90364    | 6.33467    | 51.40290    | Detected    | Detected    | Compromised | Detected    |
| 4833 | A_23_P47168   | FLRT1        | Hs.584876 | fibronectin leucine rich transmembrane protein 1                                   | Homo sapiens fibronectin leucine rich transmembrane protein 1 (FLRT1), mRNA [NM_013280]                                                          | 5.37492 | down | 1.02112  | down | 11.87126   | 66.06969    | 2.89784    | 2.60927     | Detected    | Detected    | Compromised | Compromised |
| 4834 | A_23_P214026  | FBN2         | Hs.519294 | fibrillin 2                                                                        | Homo sapiens fibrillin 2 (FBN2), mRNA [NM_001959]                                                                                                | 5.35992 | down | 5.20221  | down | 581.03140  | 3224.71480  | 580.68427  | 2663.74800  | Detected    | Detected    | Detected    | Detected    |
| 4835 | A_23_P407132  | KIRREL3      | Hs.657065 | kin of IRRE like 3 (Drosophila)                                                    | Homo sapiens kin of IRRE like 3 (Drosophila) (KIRREL3), transcript variant 1, mRNA [NM_032531]                                                   | 5.35714 | down | 3.29275  | down | 7.88733    | 43.75179    | 8.01686    | 23.30890    | Compromised | Detected    | Compromised | Detected    |
| 4836 | A_33_P3336018 |              |           |                                                                                    |                                                                                                                                                  | 5.34611 | down | 2.49084  | down | 3.85981    | 21.36668    | 3.06622    | 6.73464     | Compromised | Detected    | Compromised | Compromised |
| 4837 | A_23_P207400  | BRCA1        | Hs.194143 | breast cancer 1, early onset                                                       | Homo sapiens breast cancer 1, early onset (BRCA1), transcript variant 2, mRNA [NM_007300]                                                        | 5.34418 | down | 5.40264  | down | 177.70929  | 983.38610   | 122.69441  | 584.51580   | Detected    | Detected    | Detected    | Detected    |
| 4838 | A_33_P3618561 | LOC730961    | Hs.597933 | hypothetical protein LOC730961                                                     | Homo sapiens cDNA clone IMAGE:4826905 [BC034282]                                                                                                 | 5.34379 | down | 4.83424  | down | 21.85534   | 120.93172   | 17.06258   | 72.73414    | Detected    | Detected    | Detected    | Detected    |
| 4839 | A_33_P3407636 |              |           |                                                                                    |                                                                                                                                                  | 5.34225 | down | 5.20987  | down | 119.22460  | 659.51215   | 83.65967   | 384.33353   | Detected    | Detected    | Detected    | Detected    |
| 4840 | A_24_P30005   | SCN9A        | Hs.439145 | sodium channel, voltage-gated, type IX, alpha subunit                              | Homo sapiens sodium channel, voltage-gated, type IX, alpha subunit (SCN9A), mRNA [NM_002977]                                                     | 5.34066 | down | 8.52840  | down | 17.04645   | 94.26747    | 8.24805    | 62.02753    | Detected    | Detected    | Compromised | Detected    |
| 4841 | A_23_P141555  | TBX21        | Hs.272409 | T-box 21                                                                           | Homo sapiens T-box 21 (TBX21), mRNA [NM_013351]                                                                                                  | 5.32979 | down | 5.31359  | down | 1477.72140 | 8155.22170  | 1039.61620 | 4871.09230  | Detected    | Detected    | Detected    | Detected    |
| 4842 | A_33_P3333158 | CPXM2        | Hs.656887 | carboxypeptidase X (M14 family), member 2                                          | Homo sapiens carboxypeptidase X (M14 family), member 2 (CPXM2), mRNA [NM_198148]                                                                 | 5.32834 | down | 5.87874  | down | 44.43957   | 245.18541   | 41.77436   | 216.55050   | Detected    | Detected    | Detected    | Detected    |
| 4843 | A_24_P195286  | LOC203510    |           | similar to hCG1644442                                                              | PREDICTED: Homo sapiens similar to hCG1644442 (LOC203510), mRNA [XM_001719132]                                                                   | 5.32135 | down | 5.18716  | down | 201.58711  | 1110.75420  | 16.75178   | 76.62241    | Detected    | Detected    | Detected    | Detected    |
| 4844 | A_24_P287941  | PSMC3IP      | Hs.383019 | PSMC3 interacting protein                                                          | Homo sapiens PSMC3 interacting protein (PSMC3IP), transcript variant 1, mRNA [NM_013290]                                                         | 5.32069 | down | 5.29312  | down | 361.94320  | 1994.07370  | 276.43893  | 1290.25780  | Detected    | Detected    | Detected    | Detected    |
| 4845 | A_33_P3211804 | RUNX1        | Hs.149261 | runt-related transcription factor 1                                                | Homo sapiens runt-related transcription factor 1 (RUNX1), transcript variant 2, mRNA [NM_001001890]                                              | 5.31406 | down | 5.34870  | down | 1593.63700 | 8768.98400  | 1287.10510 | 6070.55100  | Detected    | Detected    | Detected    | Detected    |
| 4846 | A_32_P171328  | UBE2S        | Hs.396393 | ubiquitin-conjugating enzyme E2S                                                   | Homo sapiens ubiquitin-conjugating enzyme E2S (UBE2S), mRNA [NM_014501]                                                                          | 5.30852 | down | 5.43527  | down | 6794.96040 | 37350.22700 | 6059.95800 | 29043.98000 | Detected    | Detected    | Detected    | Detected    |

|      |               |           |           |                                                                                |                                                                                                                                                                                                                                                                                                                                                                                 |         |      |          |      |            |             |            |             |             |          |             |             |
|------|---------------|-----------|-----------|--------------------------------------------------------------------------------|---------------------------------------------------------------------------------------------------------------------------------------------------------------------------------------------------------------------------------------------------------------------------------------------------------------------------------------------------------------------------------|---------|------|----------|------|------------|-------------|------------|-------------|-------------|----------|-------------|-------------|
| 4847 | A_24_P276888  | CENPO     | Hs.718431 | centromere protein O                                                           | Centromere protein O (CENP-O)/Interphase centromere complex protein 36 [Source:UniProtKB/Swiss-Prot;Acc:Q9BU64] [ENST0000380834]                                                                                                                                                                                                                                                | 5.28998 | down | 6.13074  | down | 406.66095  | 2227.50800  | 332.06950  | 1795.17630  | Detected    | Detected | Detected    | Detected    |
| 4848 | A_23_P388168  | RAB3B     | Hs.123072 | RAB3B, member RAS oncogene family                                              | Homo sapiens RAB3B, member RAS oncogene family (RAB3B), mRNA [NM_002867]                                                                                                                                                                                                                                                                                                        | 5.28882 | down | 5.06239  | down | 803.49520  | 4400.22950  | 557.61300  | 2489.16720  | Detected    | Detected | Detected    | Detected    |
| 4849 | A_23_P167129  | HHP       | Hs.507991 | hedgehog interacting protein                                                   | Homo sapiens hedgehog interacting protein (HHP), mRNA [NM_022475]                                                                                                                                                                                                                                                                                                               | 5.28138 | down | 6.23850  | down | 68.96924   | 377.16910   | 54.35737   | 299.02258   | Detected    | Detected | Detected    | Detected    |
| 4850 | A_23_P44684   | ECT2      | Hs.518299 | epithelial cell transforming sequence 2 oncogene                               | Homo sapiens epithelial cell transforming sequence 2 oncogene (ECT2), mRNA [NM_018098]                                                                                                                                                                                                                                                                                          | 5.27814 | down | 4.55702  | down | 214.09161  | 1170.07530  | 265.90915  | 1068.51170  | Detected    | Detected | Detected    | Detected    |
| 4851 | A_23_P170491  | TRAF1     | Hs.517972 | TRAF1 interacting protein                                                      | Homo sapiens TRAF1 interacting protein (TRAF1), mRNA [NM_005879]                                                                                                                                                                                                                                                                                                                | 5.27779 | down | 5.59030  | down | 681.31270  | 3723.32840  | 737.81085  | 3637.01680  | Detected    | Detected | Detected    | Detected    |
| 4852 | A_33_P3234222 | TSPO2     | Hs.357392 | translocator protein 2                                                         | Homo sapiens translocator protein 2 (TSPO2), transcript variant 1, mRNA [NM_001010873]                                                                                                                                                                                                                                                                                          | 5.26568 | down | 5.76133  | down | 1853.08690 | 10103.76000 | 609.54254  | 3096.64820  | Detected    | Detected | Detected    | Detected    |
| 4853 | A_24_P168726  | NF2       | Hs.187898 | neurofibromin 2 (merlin)                                                       | Homo sapiens neurofibromin 2 (merlin) (NF2), transcript variant 13, mRNA [NM_181831]                                                                                                                                                                                                                                                                                            | 5.24684 | down | 5.05431  | down | 343.62340  | 1866.86720  | 368.18164  | 1640.92660  | Detected    | Detected | Detected    | Detected    |
| 4854 | A_32_P52153   |           |           |                                                                                |                                                                                                                                                                                                                                                                                                                                                                                 | 5.23919 | down | 4.78321  | down | 77.06253   | 418.06195   | 59.57576   | 251.27786   | Detected    | Detected | Detected    | Detected    |
| 4855 | A_33_P3340025 | GINS1     | Hs.658464 | GINS complex subunit 1 (Psf1 homolog)                                          | Homo sapiens GINS complex subunit 1 (Psf1 homolog) (GINS1), mRNA [NM_021067]                                                                                                                                                                                                                                                                                                    | 5.22995 | down | 5.82693  | down | 373.13315  | 2020.66400  | 230.54713  | 1184.58180  | Detected    | Detected | Detected    | Detected    |
| 4856 | A_23_P214459  | PRPH2     | Hs.654489 | peripherin 2 (retinal degeneration, slow)                                      | Homo sapiens peripherin 2 (retinal degeneration, slow) (PRPH2), mRNA [NM_000322]                                                                                                                                                                                                                                                                                                | 5.21642 | down | 6.04036  | down | 35.85943   | 193.69070   | 23.47225   | 125.02110   | Detected    | Detected | Detected    | Detected    |
| 4857 | A_23_P76774   | GSC       | Hs.440438 | goosecoid homeobox                                                             | Homo sapiens goosecoid homeobox (GSC), mRNA [NM_173849]                                                                                                                                                                                                                                                                                                                         | 5.21498 | down | 4.61404  | down | 99.12335   | 535.25590   | 118.83870  | 483.50885   | Detected    | Detected | Detected    | Detected    |
| 4858 | A_23_P487     | UCK2      | Hs.458360 | uridine-cytidine kinase 2                                                      | Homo sapiens uridine-cytidine kinase 2 (UCK2), mRNA [NM_012474]                                                                                                                                                                                                                                                                                                                 | 5.21243 | down | 5.35292  | down | 3541.72500 | 19115.59800 | 3074.98730 | 14514.41800 | Detected    | Detected | Detected    | Detected    |
| 4859 | A_23_P105144  | SCUBE2    | Hs.523468 | signal peptide, CUB domain, EGF-like 2                                         | Homo sapiens signal peptide, CUB domain, EGF-like 2 (SCUBE2), mRNA [NM_020974]                                                                                                                                                                                                                                                                                                  | 5.20614 | down | 4.61871  | down | 38.50871   | 207.59084   | 22.64691   | 92.23489    | Detected    | Detected | Detected    | Detected    |
| 4860 | A_24_P516246  | FLJ12825  | Hs.350378 | hypothetical LOC440101                                                         | Homo sapiens hypothetical LOC440101 (FLJ12825), non-coding RNA [NR_028655]                                                                                                                                                                                                                                                                                                      | 5.19401 | down | 3.37204  | down | 6.74914    | 36.29810    | 5.43618    | 16.16413    | Compromised | Detected | Compromised | Compromised |
| 4861 | A_24_P335620  | SLC7A5    | Hs.513797 | solute carrier family 7 (cationic amino acid transporter, y+ system), member 5 | Homo sapiens solute carrier family 7 (cationic amino acid transporter, y+ system), member 5 (SLC7A5), mRNA [NM_003486]                                                                                                                                                                                                                                                          | 5.18929 | down | 5.95787  | down | 855.25760  | 4595.55200  | 611.42145  | 3212.15820  | Detected    | Detected | Detected    | Detected    |
| 4862 | A_33_P3344603 | ZNF280D   | Hs.511477 | zinc finger protein 280D                                                       | Homo sapiens zinc finger protein 280D (ZNF280D), transcript variant 3, mRNA [NM_001002844]                                                                                                                                                                                                                                                                                      | 5.17996 | down | 6.03430  | down | 41.02706   | 220.05440   | 25.73241   | 136.92195   | Detected    | Detected | Detected    | Detected    |
| 4863 | A_23_P167997  | HIST1H2BG | Hs.591809 | histone cluster 1, H2bg                                                        | Homo sapiens histone cluster 1, H2bg (HIST1H2BG), mRNA [NM_003518]                                                                                                                                                                                                                                                                                                              | 5.17292 | down | 4.82838  | down | 80.57515   | 431.58870   | 95.09494   | 404.87830   | Detected    | Detected | Detected    | Detected    |
| 4864 | A_24_P212443  | UBE3C     | Hs.118351 | ubiquitin protein ligase E3C                                                   | Homo sapiens ubiquitin protein ligase E3C (UBE3C), mRNA [NM_014671]                                                                                                                                                                                                                                                                                                             | 5.17227 | down | 4.26333  | down | 18.67925   | 100.04002   | 15.69420   | 59.00026    | Detected    | Detected | Detected    | Detected    |
| 4865 | A_23_P312863  | TUBB2C    | Hs.433615 | tubulin, beta 2C                                                               | Homo sapiens tubulin, beta 2C (TUBB2C), mRNA [NM_006088]                                                                                                                                                                                                                                                                                                                        | 5.16322 | down | 4.88925  | down | 6846.95200 | 36605.89000 | 6584.44000 | 28387.43600 | Detected    | Detected | Detected    | Detected    |
| 4866 | A_33_P3282634 | ALDH1L2   | Hs.42572  | aldehyde dehydrogenase 1 family, member L2                                     | Homo sapiens aldehyde dehydrogenase 1 family, member L2 (ALDH1L2), transcript variant 1, mRNA [NM_001034173]                                                                                                                                                                                                                                                                    | 5.16205 | down | 5.23953  | down | 27.16264   | 145.18670   | 23.58183   | 108.95201   | Detected    | Detected | Detected    | Detected    |
| 4867 | A_32_P55860   | SKA2      | Hs.463607 | spindle and kinetochore associated complex subunit 2                           | Homo sapiens spindle and kinetochore associated complex subunit 2 (SKA2), transcript variant 1, mRNA [NM_162620]                                                                                                                                                                                                                                                                | 5.15753 | down | 4.65911  | down | 113.54931  | 606.40015   | 101.11241  | 415.40610   | Detected    | Detected | Detected    | Detected    |
| 4868 | A_33_P3404221 |           |           |                                                                                | DEP domain-containing protein 1A [Source:UniProtKB/Swiss-Prot;Acc:Q5TB30] [ENST00000370964]                                                                                                                                                                                                                                                                                     | 5.15458 | down | 6.78709  | down | 18.65996   | 99.59500    | 6.31886    | 37.81705    | Detected    | Detected | Compromised | Detected    |
| 4869 | A_32_P1381    |           | Hs.510835 |                                                                                | cc82403.s1 NCI CGAP Kid5 Homo sapiens cDNA clone IMAGE:1572677 3' similar to gbX13546.ra1 Human HMG-17 gene for non-histone chromosomal protein (HUMAN), mRNA sequence [AA970917]                                                                                                                                                                                               | 5.14235 | down | 5.05529  | down | 2686.72880 | 14306.01000 | 2493.68140 | 11116.09200 | Detected    | Detected | Detected    | Detected    |
| 4870 | A_33_P3251227 |           |           |                                                                                | Glycoprotein-N-acetylgalactosamine 3-beta-galactosyltransferase 1 (EC 2.4.1.122)(Core 1 beta1,3-galactosyltransferase 1)(Core 1 beta3-Gal-T)(G)GALTI1(Core 1 UDP-galactose 4-epimerase/galactosamine-alpha-R beta 1,3-galactosyltransferase 1)(Beta 1,3-galactosyltransferase)(Core 1 O-glycan T-synthase)(B3Gal-T8) [Source:UniProtKB/Swiss-Prot;Acc:Q9NS00] [ENST00000402468] | 5.13987 | down | 5.25184  | down | 185.99945  | 989.91340   | 136.37470  | 631.55430   | Detected    | Detected | Detected    | Detected    |
| 4871 | A_33_P3297930 | COL8A2    | Hs.353001 | collagen, type VIII, alpha 2                                                   | Homo sapiens collagen, type VIII, alpha 2 (COL8A2), mRNA [NM_005202]                                                                                                                                                                                                                                                                                                            | 5.12497 | down | 1.50776  | down | 81.95367   | 434.90370   | 86.16969   | 114.56500   | Detected    | Detected | Detected    | Detected    |
| 4872 | A_33_P3213645 | ERN2      | Hs.592041 | endoplasmic reticulum to nucleus signaling 2                                   | Homo sapiens endoplasmic reticulum to nucleus signaling 2 (ERN2), mRNA [NM_033286]                                                                                                                                                                                                                                                                                              | 5.12383 | down | 13.90805 | down | 9.48937    | 50.34607    | 2.41230    | 29.58440    | Compromised | Detected | Compromised | Detected    |
| 4873 | A_23_P93180   | HIST1H2BC | Hs.658713 | histone cluster 1, H2bc                                                        | Homo sapiens histone cluster 1, H2bc (HIST1H2BC), mRNA [NM_003526]                                                                                                                                                                                                                                                                                                              | 5.11242 | down | 4.68272  | down | 86.70694   | 459.00080   | 91.98714   | 379.83150   | Detected    | Detected | Detected    | Detected    |
| 4874 | A_33_P3369098 | MYL10     | Hs.247831 | myosin, light chain 10, regulatory                                             | Homo sapiens myosin, light chain 10, regulatory (MYL10), mRNA [NM_139403]                                                                                                                                                                                                                                                                                                       | 5.11036 | down | 10.31547 | down | 26.28557   | 139.09198   | 11.38359   | 103.54610   | Detected    | Detected | Compromised | Detected    |
| 4875 | A_33_P3229122 | HIST1H2BF | Hs.182137 | histone cluster 1, H2bf                                                        | Homo sapiens histone cluster 1, H2bf (HIST1H2BF), mRNA [NM_003522]                                                                                                                                                                                                                                                                                                              | 5.10882 | down | 5.55097  | down | 3.49279    | 18.47677    | 3.07647    | 15.05870    | Compromised | Detected | Compromised | Compromised |

|      |               |              |           |                                                                         |                                                                                                                                |         |      |          |      |             |             |             |             |             |             |             |             |
|------|---------------|--------------|-----------|-------------------------------------------------------------------------|--------------------------------------------------------------------------------------------------------------------------------|---------|------|----------|------|-------------|-------------|-------------|-------------|-------------|-------------|-------------|-------------|
| 4876 | A_33_P3317253 | PTER         | Hs.444321 | phosphotriesterase related                                              | Homo sapiens phosphotriesterase related (PTER), transcript variant 1, mRNA [NM_001001484]                                      | 5.09587 | down | 4.57032  | down | 94.17305    | 496.90990   | 67.41232    | 271.67593   | Detected    | Detected    | Detected    | Detected    |
| 4877 | A_24_P355493  | LHPP         | Hs.527748 | phospholysine phosphohistidine inorganic pyrophosphate phosphatase      | Homo sapiens phospholysine phosphohistidine inorganic pyrophosphate phosphatase (LHPP), mRNA [NM_022126]                       | 5.09295 | down | 4.74581  | down | 68.80198    | 362.83002   | 84.55750    | 353.85680   | Detected    | Detected    | Detected    | Detected    |
| 4878 | A_23_P211110  | SIM2         | Hs.146186 | single-minded homolog 2 (Drosophila)                                    | Homo sapiens single-minded homolog 2 (Drosophila) (SIM2), transcript variant SIM2, mRNA [NM_005069]                            | 5.08735 | down | 11.71559 | down | 8.86429     | 46.69481    | 2.32261     | 23.99417    | Compromised | Detected    | Compromised | Detected    |
| 4879 | A_33_P3376925 | LOC643371    |           | similar to hCG1642839                                                   | PREDICTED: Homo sapiens similar to hCG1642839 (LOC643371), miscRNA [XR_078596]                                                 | 5.07936 | down | 3.51635  | down | 1051.21480  | 5528.82960  | 146.95540   | 455.66208   | Detected    | Detected    | Detected    | Detected    |
| 4880 | A_33_P3390122 | GIPC2        | Hs.659356 | GIPC PDZ domain containing family, member 2                             | Homo sapiens GIPC PDZ domain containing family, member 2 (GIPC2), mRNA [NM_017655]                                             | 5.07078 | down | 6.71962  | down | 9.10933     | 47.82937    | 10.15155    | 60.15094    | Compromised | Detected    | Compromised | Detected    |
| 4881 | A_23_P213153  | HNRPDL       | Hs.527105 | heterogeneous nuclear ribonucleoprotein D-like                          | Homo sapiens heterogeneous nuclear ribonucleoprotein D-like (HNRPDL), transcript variant 2, mRNA [NM_031372]                   | 5.06530 | down | 5.01680  | down | 3988.68530  | 20920.29100 | 2521.27900  | 11153.54200 | Detected    | Detected    | Detected    | Detected    |
| 4882 | A_33_P3409477 | UBASH3B      | Hs.444075 | ubiquitin associated and SH3 domain containing, B                       | Homo sapiens ubiquitin associated and SH3 domain containing, B (UBASH3B), mRNA [NM_032873]                                     | 5.05403 | down | 5.26956  | down | 128.88858   | 674.50574   | 87.85234    | 408.21930   | Detected    | Detected    | Detected    | Detected    |
| 4883 | A_33_P3639068 | GFR1         | Hs.388347 | GDNF family receptor alpha 1                                            | Homo sapiens GDNF family receptor alpha 1 (GFR1), transcript variant 1, mRNA [NM_005264]                                       | 5.05258 | down | 3.65496  | down | 79.89974    | 418.01470   | 90.51180    | 291.71167   | Detected    | Detected    | Detected    | Detected    |
| 4884 | A_33_P3280400 | MGC72080     | Hs.507862 | MGC72080 pseudogene                                                     | Homo sapiens MGC72080 pseudogene (MGC72080), non-coding RNA [NR_002822]                                                        | 5.05073 | down | 6.44908  | down | 69.33778    | 362.62450   | 45.86754    | 260.83658   | Detected    | Detected    | Detected    | Detected    |
| 4885 | A_33_P3306898 | C11orf41     | Hs.502266 | chromosome 11 open reading frame 41                                     | Homo sapiens chromosome 11 open reading frame 41 (C11orf41), mRNA [NM_012194]                                                  | 5.04089 | down | 3.85961  | down | 30.83955    | 160.97112   | 29.00075    | 98.70029    | Detected    | Detected    | Detected    | Detected    |
| 4886 | A_24_P58529   | TUBA1C       | Hs.719091 | tubulin, alpha 1c                                                       | Homo sapiens tubulin, alpha 1c (TUBA1C), mRNA [NM_032704]                                                                      | 5.04082 | down | 4.87195  | down | 12594.35100 | 65736.98000 | 17427.39600 | 74868.83600 | Detected    | Detected    | Detected    | Detected    |
| 4887 | A_23_P120227  | LBH          | Hs.567598 | limb bud and heart development homolog (mouse)                          | Homo sapiens limb bud and heart development homolog (mouse) (LBH), mRNA [NM_030915]                                            | 5.03746 | down | 5.18105  | down | 903.55070   | 4713.00240  | 603.57950   | 2757.51220  | Detected    | Detected    | Detected    | Detected    |
| 4888 | A_33_P3384871 | FBX05        | Hs.520506 | F-box protein 5                                                         | Homo sapiens F-box protein 5 (FBX05), transcript variant 2, mRNA [NM_001142522]                                                | 5.03545 | down | 4.51224  | down | 429.82947   | 2241.13300  | 323.89540   | 1288.73120  | Detected    | Detected    | Detected    | Detected    |
| 4889 | A_23_P373119  | HMG3L1       | Hs.558624 | high-mobility group box 3-like 1                                        | Homo sapiens high-mobility group box 3-like 1 (HMG3L1), non-coding RNA [NR_002165]                                             | 5.03124 | down | 4.91625  | down | 1296.64650  | 6755.07030  | 837.34796   | 3629.98630  | Detected    | Detected    | Detected    | Detected    |
| 4890 | A_24_P186943  | ELN          | Hs.647061 | elastin                                                                 | Homo sapiens elastin (ELN), transcript variant 1, mRNA [NM_000501]                                                             | 5.02967 | down | 12.15771 | down | 228.40677   | 1189.54580  | 79.07068    | 847.68170   | Detected    | Detected    | Detected    | Detected    |
| 4891 | A_33_P3237719 | LOC100129652 |           | hypothetical protein LOC100129652                                       | PREDICTED: Homo sapiens hypothetical LOC100129652 (LOC100129652), mRNA [XM_001716612]                                          | 5.02272 | down | 1.87445  | down | 6.13799     | 31.92258    | 8.55560     | 14.14132    | Compromised | Detected    | Compromised | Compromised |
| 4892 | A_33_P3659876 | NCAPG2       | Hs.186116 | non-SMC condensin II complex, subunit G2                                | Homo sapiens non-SMC condensin II complex, subunit G2 (NCAPG2), mRNA [NM_017760]                                               | 5.01665 | down | 4.95112  | down | 270.82816   | 1406.82780  | 178.78595   | 780.55347   | Detected    | Detected    | Detected    | Detected    |
| 4893 | A_23_P122924  | INHBA        | Hs.583348 | inhibin, beta A                                                         | Homo sapiens inhibin, beta A (INHBA), mRNA [NM_002192]                                                                         | 5.01462 | down | 4.70405  | down | 8814.29800  | 45767.67600 | 7573.83060  | 31416.12300 | Detected    | Detected    | Detected    | Detected    |
| 4894 | A_23_P111672  | TES          | Hs.592286 | testis derived transcript (3 LIM domains)                               | Homo sapiens testis derived transcript (3 LIM domains) (TES), transcript variant 2, mRNA [NM_152829]                           | 5.01313 | down | 5.40680  | down | 65.47565    | 339.87695   | 36.94475    | 176.14014   | Detected    | Detected    | Detected    | Detected    |
| 4895 | A_32_P66804   | PTPRN2       | Hs.490789 | protein tyrosine phosphatase, receptor type, N polypeptide 2            | Homo sapiens protein tyrosine phosphatase, receptor type, N polypeptide 2 (PTPRN2), transcript variant 1, mRNA [NM_002847]     | 5.01217 | down | 3.72176  | down | 5.99928     | 31.13566    | 4.30362     | 14.12366    | Compromised | Detected    | Compromised | Compromised |
| 4896 | A_23_P12079   | KCNK4        | Hs.153521 | potassium voltage-gated channel, Shaw-related subfamily, member 4       | Homo sapiens potassium voltage-gated channel, Shaw-related subfamily, member 4 (KCNK4), transcript variant 2, mRNA [NM_153763] | 5.00864 | down | 5.90477  | down | 46.86871    | 243.07242   | 44.27237    | 230.51590   | Detected    | Detected    | Detected    | Detected    |
| 4897 | A_33_P3304998 | LOC100128960 |           | similar to Putative paraneoplastic antigen-like protein 6B-like protein | PREDICTED: Homo sapiens similar to paraneoplastic antigen MA2 (LOC100128960), mRNA [XM_001714501]                              | 5.00652 | down | 1.60616  | down | 2.39021     | 12.39096    | 17.92675    | 25.38967    | Compromised | Compromised | Detected    | Detected    |
| 4898 | A_33_P3260146 |              |           |                                                                         | Aminopeptidase O (AP-O)(EC 3.4.11.-) [Source:UniProtKB/Swiss-Prot;Acc:Q8N6M6] [ENST00000271198]                                | 5.00144 | down | 5.43480  | down | 5.60996     | 29.05278    | 8.54823     | 40.96616    | Compromised | Detected    | Compromised | Detected    |
| 4899 | A_33_P3323564 | LOC646324    | Hs.655713 | hypothetical LOC646324                                                  | Homo sapiens cDNA FLJ42907 fis, clone BRHIP3016302 [AK124897]                                                                  | 5.00101 | down | 6.86238  | down | 27.79241    | 143.91875   | 21.90435    | 132.54730   | Detected    | Detected    | Detected    | Detected    |
| 4900 | A_33_P3319765 |              |           |                                                                         | Fanconi anemia group C protein (Protein FAC) [Source:UniProtKB/Swiss-Prot;Acc:Q00597] [ENST00000395345]                        | 4.99626 | down | 5.41790  | down | 19.41148    | 100.42371   | 12.26209    | 58.58151    | Detected    | Detected    | Compromised | Detected    |
| 4901 | A_24_P413920  | FAM84A       | Hs.260855 | family with sequence similarity 84, member A                            | Homo sapiens family with sequence similarity 84, member A (FAM84A), mRNA [NM_145175]                                           | 4.99565 | down | 2.90561  | down | 554.90330   | 2870.39940  | 207.21620   | 530.91730   | Detected    | Detected    | Detected    | Detected    |
| 4902 | A_23_P91829   | DCBLD2       | Hs.203691 | discoidin, CUB and LCCL domain containing 2                             | Homo sapiens discoidin, CUB and LCCL domain containing 2 (DCBLD2), mRNA [NM_080927]                                            | 4.99460 | down | 4.62646  | down | 285.92435   | 1478.71520  | 264.15753   | 1077.64810  | Detected    | Detected    | Detected    | Detected    |
| 4903 | A_23_P11543   | FUCA1        | Hs.370858 | fucosidase, alpha-L-1, tissue                                           | Homo sapiens fucosidase, alpha-L-1, tissue (FUCA1), mRNA [NM_000147]                                                           | 4.99369 | down | 5.30112  | down | 58.85664    | 304.33360   | 56.24582    | 262.91977   | Detected    | Detected    | Detected    | Detected    |
| 4904 | A_23_P206018  | TPM1         | Hs.133892 | tropomyosin 1 (alpha)                                                   | Homo sapiens tropomyosin 1 (alpha) (TPM1), transcript variant 3, mRNA [NM_001018004]                                           | 4.98365 | down | 5.04104  | down | 12588.56500 | 64961.57400 | 11102.85700 | 49353.77300 | Detected    | Detected    | Detected    | Detected    |

|      |               |               |           |                                                                                                       |                                                                                                                                  |         |      |          |      |            |             |            |            |             |             |             |             |
|------|---------------|---------------|-----------|-------------------------------------------------------------------------------------------------------|----------------------------------------------------------------------------------------------------------------------------------|---------|------|----------|------|------------|-------------|------------|------------|-------------|-------------|-------------|-------------|
| 4905 | A_33_P3224314 |               |           |                                                                                                       | cDNA FLJ42076 fis. clone SYNOV2018921 [Source:UniProtKB/TrEMBL;Acc:Q6ZVU4] [ENST00000377652]                                     | 4.97741 | down | 9.31495  | down | 3.02778    | 15.60487    | 3.05173    | 25.06642   | Compromised | Compromised | Compromised | Detected    |
| 4906 | A_33_P3263157 |               |           |                                                                                                       |                                                                                                                                  | 4.96111 | down | 4.69317  | down | 873.11743  | 4485.23300  | 425.61893  | 1761.37680 | Detected    | Detected    | Detected    | Detected    |
| 4907 | A_33_P3245321 | CENPP         | Hs.713775 | centromere protein P                                                                                  | Homo sapiens centromere protein P (CENPP), mRNA [NM_001012267]                                                                   | 4.94776 | down | 4.64202  | down | 530.85063  | 2718.63280  | 605.38763  | 2478.02950 | Detected    | Detected    | Detected    | Detected    |
| 4908 | A_33_P3280405 | OR7E37P       | Hs.507862 | olfactory receptor, family 7, subfamily E, member 37 pseudogene (OR7E37P), non-coding RNA [NR_002163] | Homo sapiens olfactory receptor, family 7, subfamily E, member 37 pseudogene (OR7E37P), non-coding RNA [NR_002163]               | 4.94494 | down | 4.96780  | down | 196.59637  | 1006.62880  | 163.57385  | 716.54565  | Detected    | Detected    | Detected    | Detected    |
| 4909 | A_23_P200001  | NEXN          | Hs.612385 | nexilin (F actin binding protein)                                                                     | Homo sapiens nexilin (F actin binding protein) (NEXN), mRNA [NM_144573]                                                          | 4.93663 | down | 4.79937  | down | 331.07004  | 1692.32460  | 270.96927  | 1146.75280 | Detected    | Detected    | Detected    | Detected    |
| 4910 | A_23_P329261  | KCNJ2         | Hs.1547   | potassium inwardly-rectifying channel, subfamily J, member 2                                          | Homo sapiens potassium inwardly-rectifying channel, subfamily J, member 2 (KCNJ2), mRNA [NM_000891]                              | 4.92333 | down | 5.70215  | down | 69.63425   | 354.98868   | 46.99824   | 236.31209  | Detected    | Detected    | Detected    | Detected    |
| 4911 | A_33_P3229083 | HIST1H2BK     | Hs.437275 | histone cluster 1, H2bk                                                                               | Homo sapiens histone cluster 1, H2bk (HIST1H2BK), mRNA [NM_080593]                                                               | 4.92070 | down | 4.60755  | down | 149.72333  | 762.86755   | 246.97060  | 1003.41595 | Detected    | Detected    | Detected    | Detected    |
| 4912 | A_24_P110780  | C1orf118      | Hs.632414 | chromosome 1 open reading frame 118                                                                   | PREDICTED: Homo sapiens chromosome 1 open reading frame 118 (C1orf118), miscRNA [XR_041258]                                      | 4.91811 | down | 5.15151  | down | 86.23591   | 439.15643   | 59.02673   | 268.13193  | Detected    | Detected    | Detected    | Detected    |
| 4913 | A_33_P3419790 |               | Hs.126409 |                                                                                                       | Uncharacterized protein C6orf105 [Source:UniProtKB/Swiss-Prot;Acc:Q981Z2] [ENST00000379415]                                      | 4.91759 | down | 7.27576  | down | 10.74763   | 54.72655    | 8.15376    | 52.31204   | Compromised | Detected    | Compromised | Detected    |
| 4914 | A_23_P151405  | CKAP2         | Hs.444028 | cytoskeleton associated protein 2                                                                     | Homo sapiens cytoskeleton associated protein 2 (CKAP2), transcript variant 1, mRNA [NM_018204]                                   | 4.91515 | down | 4.77794  | down | 1918.27640 | 9762.94900  | 1245.34160 | 5246.80500 | Detected    | Detected    | Detected    | Detected    |
| 4915 | A_23_P132277  | MCM5          | Hs.517582 | minichromosome maintenance complex component 5                                                        | Homo sapiens minichromosome maintenance complex component 5 (MCM5), mRNA [NM_006739]                                             | 4.91332 | down | 5.28707  | down | 1318.36170 | 6707.22460  | 1529.83230 | 7132.21100 | Detected    | Detected    | Detected    | Detected    |
| 4916 | A_24_P276102  | RBL1          | Hs.207745 | retinoblastoma-like 1 (p107)                                                                          | Homo sapiens retinoblastoma-like 1 (p107) (RBL1), transcript variant 2, mRNA [NM_193404]                                         | 4.90607 | down | 6.89707  | down | 11.03168   | 56.04131    | 5.49679    | 33.43024   | Compromised | Detected    | Compromised | Detected    |
| 4917 | A_33_P3283083 | INPP4B        | Hs.658245 | inositol polyphosphate-4-phosphatase, type II, 105kDa                                                 | Homo sapiens inositol polyphosphate-4-phosphatase, type II, 105kDa (INPP4B), transcript variant 1, mRNA [NM_003866]              | 4.90238 | down | 1.26523  | down | 7.55689    | 38.36041    | 6.10817    | 6.81470    | Compromised | Detected    | Compromised | Compromised |
| 4918 | A_23_P82775   | SOX17         | Hs.98367  | SRY (sex determining region Y)-box 17                                                                 | Homo sapiens SRY (sex determining region Y)-box 17 (SOX17), mRNA [NM_022454]                                                     | 4.89976 | down | 3.37215  | down | 16.34719   | 82.93754    | 22.94141   | 68.21697   | Detected    | Detected    | Detected    | Detected    |
| 4919 | A_33_P3323847 | RECQL4        | Hs.31442  | RecQ protein-like 4                                                                                   | Homo sapiens RecQ protein-like 4 (RECQL4), mRNA [NM_004260]                                                                      | 4.88080 | down | 5.34507  | down | 2216.91380 | 11203.99000 | 1525.21280 | 7188.68900 | Detected    | Detected    | Detected    | Detected    |
| 4920 | A_33_P3341429 | NEXN          | Hs.612385 | nexilin (F actin binding protein)                                                                     | Homo sapiens nexilin (F actin binding protein) (NEXN), mRNA [NM_144573]                                                          | 4.87964 | down | 4.60348  | down | 500.97128  | 2531.24020  | 220.64992  | 895.68616  | Detected    | Detected    | Detected    | Detected    |
| 4921 | A_33_P3310286 |               |           |                                                                                                       | Lamin-B1 [Source:UniProtKB/Swiss-Prot;Acc:P20700] [ENST00000395354]                                                              | 4.87909 | down | 6.62720  | down | 39.21571   | 198.12146   | 22.26442   | 131.00212  | Detected    | Detected    | Detected    | Detected    |
| 4922 | A_33_P3402329 | MGC16121      |           | hypothetical protein MGC16121                                                                         | Homo sapiens hypothetical protein MGC16121 (MGC16121), non-coding RNA [NR_024607]                                                | 4.86693 | down | 5.16666  | down | 328.72662  | 1656.62000  | 275.83310  | 1256.67250 | Detected    | Detected    | Detected    | Detected    |
| 4923 | A_33_P3235905 |               |           |                                                                                                       |                                                                                                                                  | 4.85946 | down | 5.75249  | down | 147.08762  | 740.11210   | 23.53027   | 119.35708  | Detected    | Detected    | Detected    | Detected    |
| 4924 | A_33_P3399061 | ADARB1        |           | adenosine deaminase, RNA-specific, B1 (RED1 homolog rat)                                              | Homo sapiens adenosine deaminase, RNA-specific, B1 (RED1 homolog rat) (ADARB1), transcript variant 4, non-coding RNA [NR_027673] | 4.84874 | down | 3.80261  | down | 33.89433   | 170.17253   | 48.96199   | 164.17480  | Detected    | Detected    | Detected    | Detected    |
| 4925 | A_23_P410717  | C1orf51       | Hs.54680  | chromosome 1 open reading frame 51                                                                    | Homo sapiens chromosome 1 open reading frame 51 (C1orf51), mRNA [NM_144697]                                                      | 4.84341 | down | 4.91848  | down | 135.76960  | 680.90520   | 159.60750  | 692.22840  | Detected    | Detected    | Detected    | Detected    |
| 4926 | A_23_P116264  | NRGN          | Hs.524116 | neurogranin (protein kinase C substrate, RC3)                                                         | Homo sapiens neurogranin (protein kinase C substrate, RC3) (NRGN), transcript variant 1, mRNA [NM_006176]                        | 4.83638 | down | 4.69314  | down | 80.44029   | 402.83470   | 88.43649   | 365.98294  | Detected    | Detected    | Detected    | Detected    |
| 4927 | A_23_P337379  | DHRS3         | Hs.289347 | dehydrogenase/reductase (SDR family) member 3                                                         | Homo sapiens dehydrogenase/reductase (SDR family) member 3 (DHRS3), mRNA [NM_004753]                                             | 4.83401 | down | 5.17731  | down | 269.08078  | 1346.86330  | 333.75830  | 1523.70920 | Detected    | Detected    | Detected    | Detected    |
| 4928 | A_33_P3361472 |               |           |                                                                                                       | Proteasome activator complex subunit 4 (Proteasome activator PA200) [Source:UniProtKB/Swiss-Prot;Acc:Q14997] [ENST00000378234]   | 4.82886 | down | 11.55625 | down | 2.54125    | 12.70649    | 2.78029    | 28.33170   | Compromised | Compromised | Compromised | Detected    |
| 4929 | A_33_P3369760 | GLIPR2        | Hs.493819 | GLI pathogenesis-related 2                                                                            | Homo sapiens GLI pathogenesis-related 2 (GLIPR2), mRNA [NM_022343]                                                               | 4.82528 | down | 4.10978  | down | 487.73367  | 2436.90200  | 471.18503  | 1707.55880 | Detected    | Detected    | Detected    | Detected    |
| 4930 | A_33_P3259902 | LOC100128372  |           | similar to hCG2040192                                                                                 | PREDICTED: Homo sapiens similar to hCG2040192 (LOC100128372), mRNA [XM_001716747]                                                | 4.82382 | down | 4.95183  | down | 656.22534  | 3277.76200  | 766.50040  | 3346.90400 | Detected    | Detected    | Detected    | Detected    |
| 4931 | A_24_P125469  | LIPG          | Hs.465102 | lipase, endothelial                                                                                   | Homo sapiens lipase, endothelial (LIPG), mRNA [NM_006033]                                                                        | 4.82351 | down | 11.83337 | down | 6.48265    | 32.27798    | 2.44510    | 25.51355   | Compromised | Detected    | Compromised | Detected    |
| 4932 | A_23_P91430   | PXMP4         | Hs.654857 | peroxisomal membrane protein 4, 24kDa                                                                 | Homo sapiens peroxisomal membrane protein 4, 24kDa (PXMP4), transcript variant 1, mRNA [NM_007238]                               | 4.81926 | down | 4.97922  | down | 298.21344  | 1488.12790  | 318.45743  | 1398.22960 | Detected    | Detected    | Detected    | Detected    |
| 4933 | A_24_P77968   | FLNC          | Hs.58414  | filamin C, gamma                                                                                      | Homo sapiens filamin C, gamma (FLNC), transcript variant 1, mRNA [NM_001458]                                                     | 4.81787 | down | 5.42464  | down | 1341.36340 | 6691.66700  | 1168.35100 | 5588.68700 | Detected    | Detected    | Detected    | Detected    |
| 4934 | A_24_P813147  | RP11-631M21.2 | Hs.532659 | tubulin, beta 8                                                                                       | Homo sapiens tubulin, beta 8 (TUBB8), transcript variant 1, mRNA [NM_177987]                                                     | 4.81211 | down | 5.14839  | down | 1284.29530 | 6399.31840  | 1527.02450 | 6932.39500 | Detected    | Detected    | Detected    | Detected    |
| 4935 | A_23_P99253   | LINTA         | Hs.144333 | lin-7 homolog A (C. elegans)                                                                          | Homo sapiens lin-7 homolog A (C. elegans) (LINTA), mRNA [NM_004664]                                                              | 4.81096 | down | 4.19429  | down | 103.33338  | 514.76074   | 102.15040  | 377.80142  | Detected    | Detected    | Detected    | Detected    |
| 4936 | A_33_P3336437 | TTL5          | Hs.709609 | tubulin tyrosine ligase-like family, member 5                                                         | Homo sapiens tubulin tyrosine ligase-like family, member 5 (TTL5), mRNA [NM_015072]                                              | 4.80240 | down | 4.17000  | down | 35.93230   | 178.68008   | 31.67737   | 116.47976  | Detected    | Detected    | Detected    | Detected    |

|      |               |           |           |                                                            |                                                                                                                               |         |      |         |      |             |             |             |             |             |             |              |          |
|------|---------------|-----------|-----------|------------------------------------------------------------|-------------------------------------------------------------------------------------------------------------------------------|---------|------|---------|------|-------------|-------------|-------------|-------------|-------------|-------------|--------------|----------|
| 4937 | A_23_P138524  | CPXM2     | Hs.656887 | carboxypeptidase X (M14 family), member 2                  | Homo sapiens carboxypeptidase X (M14 family), member 2 (CPXM2), mRNA [NM_198148]                                              | 4.79803 | down | 4.83914 | down | 588.70760   | 2924.79960  | 380.65695   | 1624.30360  | Detected    | Detected    | Detected     | Detected |
| 4938 | A_33_P3237729 | PDLIM4    | Hs.424312 | PDZ and LIM domain 4                                       | Homo sapiens PDZ and LIM domain 4 (PDLIM4), transcript variant 1, mRNA [NM_003687]                                            | 4.79563 | down | 4.95296 | down | 96.01392    | 476.77423   | 66.11311    | 288.74720   | Detected    | Detected    | Detected     | Detected |
| 4939 | A_23_P28733   | RBL1      | Hs.207745 | retinoblastoma-like 1 (p107)                               | Homo sapiens retinoblastoma-like 1 (p107) (RBL1), transcript variant 1, mRNA [NM_002895]                                      | 4.78933 | down | 4.76244 | down | 59.32535    | 294.20360   | 59.22743    | 248.72429   | Detected    | Detected    | Detected     | Detected |
| 4940 | A_33_P3280801 | LMO7      | Hs.207631 | LIM domain 7                                               | Homo sapiens LIM domain 7 (LMO7), transcript variant 1, mRNA [NM_005358]                                                      | 4.78344 | down | 4.75944 | down | 226.85376   | 1123.61880  | 254.31744   | 1067.32710  | Detected    | Detected    | Detected     | Detected |
| 4941 | A_33_P3420466 | MATN3     | Hs.656199 | matrilin 3                                                 | Homo sapiens matrilin 3 (MATN3), mRNA [NM_002381]                                                                             | 4.77927 | down | 3.99631 | down | 17.29306    | 85.57879    | 19.28639    | 67.96354    | Detected    | Detected    | Detected     | Detected |
| 4942 | A_23_P43157   | MYBL1     | Hs.445898 | v-myb myeloblastosis viral oncogene homolog (avian)-like 1 | Homo sapiens v-myb myeloblastosis viral oncogene homolog (avian)-like 1 (MYBL1), transcript variant 1, mRNA [NM_001080416]    | 4.77451 | down | 4.61857 | down | 218.56741   | 1080.55700  | 185.30968   | 754.69385   | Detected    | Detected    | Detected     | Detected |
| 4943 | A_33_P3346483 |           |           |                                                            | Synaptopodin 2-like protein [Source:UniProtKB/Swiss-Prot;Acc:Q9H987] [ENST00000372872]                                        | 4.77343 | down | 8.67865 | down | 10.97932    | 54.26742    | 6.09552     | 46.64751    | Compromised | Detected    | Compromised  | Detected |
| 4944 | A_23_P69586   | FAT1      | Hs.481371 | FAT tumor suppressor homolog 1 (Drosophila)                | Homo sapiens FAT tumor suppressor homolog 1 (Drosophila) (FAT1), mRNA [NM_005245]                                             | 4.76949 | down | 4.61213 | down | 1207.71370  | 5964.42630  | 889.89900   | 3619.16140  | Detected    | Detected    | Detected     | Detected |
| 4945 | A_23_P19030   | ARSI      | Hs.591252 | arylsulfatase family, member 1                             | Homo sapiens arylsulfatase family, member 1 (ARSI), mRNA [NM_001012301]                                                       | 4.76940 | down | 5.13793 | down | 137.05452   | 676.84710   | 165.43192   | 749.50250   | Detected    | Detected    | Detected     | Detected |
| 4946 | A_24_P263653  | DOCK2     | Hs.586174 | dedicator of cytokinesis 2                                 | Homo sapiens dedicator of cytokinesis 2 (DOCK2), mRNA [NM_004946]                                                             | 4.74544 | down | 5.47790 | down | 16.41420    | 80.65463    | 23.77668    | 114.85003   | Detected    | Detected    | Detected     | Detected |
| 4947 | A_24_P24685   | LOC729595 |           | similar to high mobility group box 3                       | PREDICTED: Homo sapiens similar to high mobility group box 3, transcript variant 1 (LOC729595), mRNA [XM_001130734]           | 4.74363 | down | 5.84415 | down | 108.68327   | 533.83470   | 77.04117    | 397.01743   | Detected    | Detected    | Detected     | Detected |
| 4948 | A_33_P3284951 | MCM5      | Hs.517582 | minichromosome maintenance complex component 5             | Homo sapiens minichromosome maintenance complex component 5 (MCM5), mRNA [NM_006739]                                          | 4.71559 | down | 5.59083 | down | 550.48260   | 2687.89770  | 594.46550   | 2930.68290  | Detected    | Detected    | Detected     | Detected |
| 4949 | A_33_P3319041 | HMG3      | Hs.191114 | high-mobility group box 3                                  | Homo sapiens high-mobility group box 3 (HMG3), mRNA [NM_005342]                                                               | 4.70783 | down | 4.97913 | down | 1822.53380  | 8884.43600  | 1237.22490  | 5432.09600  | Detected    | Detected    | Detected     | Detected |
| 4950 | A_33_P3349840 | LOC646049 |           | hypothetical LOC646049                                     | PREDICTED: Homo sapiens hypothetical LOC646049 (LOC646049), mRNA [XM_001722987]                                               | 4.69702 | down | 5.05447 | down | 1462.09910  | 7111.03120  | 900.85504   | 4015.09420  | Detected    | Detected    | Detected     | Detected |
| 4951 | A_33_P3401179 |           |           |                                                            |                                                                                                                               | 4.69508 | down | 4.25407 | down | 2.43390     | 11.83258    | 4.94412     | 18.54637    | Compromised | Compromised | Compromised  | Detected |
| 4952 | A_23_P148984  | DARS2     | Hs.647707 | aspartyl-tRNA synthetase 2, mitochondrial                  | Homo sapiens aspartyl-tRNA synthetase 2, mitochondrial (DARS2), nuclear gene encoding mitochondrial protein, mRNA [NM_018112] | 4.69403 | down | 5.00910 | down | 75.73225    | 368.09500   | 50.32705    | 222.29356   | Detected    | Detected    | Detected     | Detected |
| 4953 | A_23_P357207  | MRAP2     | Hs.370055 | melanocortin 2 receptor accessory protein 2                | Homo sapiens melanocortin 2 receptor accessory protein 2 (MRAP2), mRNA [NM_138409]                                            | 4.68824 | down | 4.17098 | down | 52.16884    | 253.25250   | 48.21416    | 177.32857   | Detected    | Detected    | Detected     | Detected |
| 4954 | A_23_P46781   | ITGA8     | Hs.171311 | integrin, alpha 8                                          | Homo sapiens integrin, alpha 8 (ITGA8), mRNA [NM_003638]                                                                      | 4.68750 | down | 2.83748 | down | 9.06729     | 44.01004    | 7.85035     | 19.64209    | Compromised | Detected    | Compromised  | Detected |
| 4955 | A_23_P19291   | TUBB2A    | Hs.654543 | tubulin, beta 2A                                           | Homo sapiens tubulin, beta 2A (TUBB2A), mRNA [NM_001069]                                                                      | 4.68374 | down | 4.75856 | down | 14703.07300 | 71307.35000 | 13596.52500 | 57051.73000 | Detected    | Detected    | Detected     | Detected |
| 4956 | A_23_P134454  | CAV1      | Hs.74034  | caveolin 1, caveolae protein, 22kDa                        | Homo sapiens caveolin 1, caveolae protein, 22kDa (CAV1), mRNA [NM_001753]                                                     | 4.67558 | down | 4.56047 | down | 20129.15400 | 97452.82000 | 13978.40500 | 56212.50800 | Detected    | Detected    | Detected     | Detected |
| 4957 | A_24_P113144  | ATAD5     | Hs.528902 | ATPase family, AAA domain containing 5                     | Homo sapiens ATPase family, AAA domain containing 5 (ATAD5), mRNA [NM_024937]                                                 | 4.67547 | down | 4.55128 | down | 25.94260    | 125.59493   | 19.19552    | 77.03696    | Detected    | Detected    | Detected     | Detected |
| 4958 | A_23_P119040  | GREB1L    | Hs.149020 | growth regulation by estrogen in breast cancer-like        | Homo sapiens growth regulation by estrogen in breast cancer-like (GREB1L), mRNA [NM_001142966]                                | 4.67520 | down | 3.28785 | down | 13.50212    | 65.36356    | 12.12866    | 35.16392    | Detected    | Detected    | Not Detected | Detected |
| 4959 | A_23_P45917   | OXS1B     | Hs.374378 | ODC28 protein kinase regulatory subunit 1B                 | Homo sapiens ODC28 protein kinase regulatory subunit 1B (OXS1B), transcript variant 1, mRNA [NM_001826]                       | 4.67503 | down | 4.75047 | down | 8821.70600  | 42704.15000 | 9565.47200  | 40068.95700 | Detected    | Detected    | Detected     | Detected |
| 4960 | A_23_P209394  | CFLAR     | Hs.390736 | CASP8 and FADD-like apoptosis regulator                    | Homo sapiens CASP8 and FADD-like apoptosis regulator (CFLAR), transcript variant 3, mRNA [NM_001127184]                       | 4.67165 | down | 4.71388 | down | 733.48920   | 3548.11280  | 626.20910   | 2602.93480  | Detected    | Detected    | Detected     | Detected |
| 4961 | A_33_P3231953 | COL12A1   | Hs.101302 | collagen, type XII, alpha 1                                | Homo sapiens collagen, type XII, alpha 1 (COL12A1), transcript variant long, mRNA [NM_004370]                                 | 4.66935 | down | 4.49362 | down | 45.62227    | 220.57993   | 39.70931    | 157.34549   | Detected    | Detected    | Detected     | Detected |
| 4962 | A_33_P3331307 | CDC42EP3  | Hs.369574 | CDC42 effector protein (Rho GTPase binding) 3              | Homo sapiens CDC42 effector protein (Rho GTPase binding) 3 (CDC42EP3), mRNA [NM_006449]                                       | 4.66804 | down | 5.64945 | down | 64.33516    | 310.96844   | 38.46300    | 191.60840   | Detected    | Detected    | Detected     | Detected |
| 4963 | A_24_P409250  |           |           |                                                            | Elongation factor 1-gamma (EF-1-gamma)(EF-1B gamma) [Source:UniProtKB/Swiss-Prot;Acc:P26641] [ENST00000308436]                | 4.66024 | down | 5.99645 | down | 24.14008    | 116.48773   | 18.54161    | 98.04096    | Detected    | Detected    | Detected     | Detected |
| 4964 | A_23_P56578   | VIT       | Hs.137415 | vitrin                                                     | Homo sapiens vitrin (VIT), mRNA [NM_053276]                                                                                   | 4.65873 | down | 4.88177 | down | 75.32980    | 363.38544   | 66.07529    | 284.43450   | Detected    | Detected    | Detected     | Detected |
| 4965 | A_24_P67681   | LOC441795 |           | high mobility group protein B3-like protein-like           | Putative high mobility group protein B3-like protein [Source:UniProtKB/Swiss-Prot;Acc:POC8E5] [ENST00000447408]               | 4.62791 | down | 4.77405 | down | 1411.96500  | 6766.15330  | 1132.83900  | 4768.92400  | Detected    | Detected    | Detected     | Detected |
| 4966 | A_33_P3223495 |           |           |                                                            | Protein furry homolog [Source:UniProtKB/Swiss-Prot;Acc:Q5TBA9] [ENST00000380218]                                              | 4.62738 | down | 6.63436 | down | 25.85752    | 123.89551   | 9.05736     | 52.98659    | Detected    | Detected    | Compromised  | Detected |

|      |               |             |           |                                                                          |                                                                                                                                   |         |      |          |      |             |             |             |             |             |             |             |             |
|------|---------------|-------------|-----------|--------------------------------------------------------------------------|-----------------------------------------------------------------------------------------------------------------------------------|---------|------|----------|------|-------------|-------------|-------------|-------------|-------------|-------------|-------------|-------------|
| 4967 | A_33_P3797820 | FAM22B      | Hs.662805 | family with sequence similarity 22, member B                             | PREDICTED: Homo sapiens family with sequence similarity 22, member B, transcript variant 1 (FAM22B), mRNA [XM_001133075]          | 4.62671 | down | 7.35893  | down | 36.15212    | 173.19661   | 13.93794    | 90.44382    | Detected    | Detected    | Compromised | Detected    |
| 4968 | A_33_P3265526 | NARG1L      | Hs.512914 | NMDA receptor regulated 1-like                                           | Homo sapiens NMDA receptor regulated 1-like (NARG1L), transcript variant 5, mRNA [NM_001110798]                                   | 4.62650 | down | 4.37924  | down | 10.14592    | 48.60461    | 3.14710     | 12.15277    | Compromised | Detected    | Compromised | Compromised |
| 4969 | A_24_P350245  | DOCK5       | Hs.195403 | dedicator of cytokinesis 5                                               | Homo sapiens dedicator of cytokinesis 5 (DOCK5), mRNA [NM_024940]                                                                 | 4.62643 | down | 4.32587  | down | 77.75825    | 372.49902   | 96.92073    | 369.70496   | Detected    | Detected    | Detected    | Detected    |
| 4970 | A_33_P3560679 | LOC651721   | Hs.598754 | hypothetical protein LOC651721                                           | Homo sapiens hypothetical protein LOC651721, mRNA (cDNA clone IMAGE4430430), partial cds [BC026225]                               | 4.62614 | down | 7.95132  | down | 31.79598    | 152.30840   | 17.21336    | 120.68978   | Detected    | Detected    | Detected    | Detected    |
| 4971 | A_33_P3301394 | LOC729687   |           | similar to high-mobility group nucleosomal binding domain 2              | PREDICTED: Homo sapiens similar to high-mobility group nucleosomal binding domain 2 (LOC729687), mRNA [XM_001133530]              | 4.62578 | down | 4.92844  | down | 600.95233   | 2878.44430  | 758.60670   | 3296.79100  | Detected    | Detected    | Detected    | Detected    |
| 4972 | A_23_P49459   | LOC81691    | Hs.177926 | exonuclease NEF-sp                                                       | Homo sapiens exonuclease NEF-sp (LOC81691), transcript variant 1, mRNA [NM_030941]                                                | 4.62461 | down | 4.66151  | down | 85.03912    | 407.21832   | 80.32336    | 330.16720   | Detected    | Detected    | Detected    | Detected    |
| 4973 | A_33_P3317523 | STMN1       | Hs.209983 | stathmin 1                                                               | Homo sapiens stathmin 1 (STMN1), transcript variant 1, mRNA [NM_203401]                                                           | 4.62218 | down | 4.65448  | down | 8335.58300  | 39894.79000 | 6252.74660  | 25663.01000 | Detected    | Detected    | Detected    | Detected    |
| 4974 | A_32_P160561  | DOK6        | Hs.278285 | docking protein 6                                                        | Homo sapiens docking protein 6 (DOK6), mRNA [NM_152721]                                                                           | 4.62094 | down | 2.64039  | down | 11.81122    | 56.51425    | 23.61119    | 54.97334    | Compromised | Detected    | Detected    | Detected    |
| 4975 | A_23_P250385  | HIST1H1B    | Hs.131956 | histone cluster 1, H1b                                                   | Homo sapiens histone cluster 1, H1b (HIST1H1B), mRNA [NM_005322]                                                                  | 4.61948 | down | 3.62012  | down | 46.26167    | 221.28276   | 43.78721    | 139.77690   | Detected    | Detected    | Detected    | Detected    |
| 4976 | A_32_P222383  | HMG2        | Hs.181163 | high-mobility group nucleosomal binding domain 2                         | Homo sapiens high-mobility group nucleosomal binding domain 2 (HMG2), mRNA [NM_005517]                                            | 4.61657 | down | 4.55104  | down | 13079.31300 | 62522.70700 | 10102.02300 | 40540.05000 | Detected    | Detected    | Detected    | Detected    |
| 4977 | A_24_P227927  | IL21R       | Hs.210546 | interleukin 21 receptor                                                  | Homo sapiens interleukin 21 receptor (IL21R), transcript variant 2, mRNA [NM_181078]                                              | 4.61618 | down | 4.72694  | down | 29.49439    | 140.97920   | 38.96089    | 162.39569   | Detected    | Detected    | Detected    | Detected    |
| 4978 | A_33_P3839897 | RNU4ATAC    | Hs.689638 | RNA, U4tacc small nuclear (U12-dependent splicing)                       | HHAGE001732 Human liver regeneration after partial hepatectomy Homo sapiens cDNA, mRNA sequence [DW419002]                        | 4.61529 | down | 17.01053 | down | 36.73500    | 175.55450   | 7.73602     | 116.03821   | Detected    | Detected    | Compromised | Detected    |
| 4979 | A_23_P19673   | SGK1        | Hs.510078 | serum/glucocorticoid regulated kinase 1                                  | Homo sapiens serum/glucocorticoid regulated kinase 1 (SGK1), transcript variant 1, mRNA [NM_005627]                               | 4.61040 | down | 4.79314  | down | 4232.22360  | 20204.15400 | 3493.31960  | 14764.68600 | Detected    | Detected    | Detected    | Detected    |
| 4980 | A_23_P15876   | ALPK2       | Hs.628152 | alpha-kinase 2                                                           | Homo sapiens alpha-kinase 2 (ALPK2), mRNA [NM_052947]                                                                             | 4.60869 | down | 4.78297  | down | 440.79620   | 2103.52780  | 288.80008   | 1218.03710  | Detected    | Detected    | Detected    | Detected    |
| 4981 | A_23_P161615  | POLA2       | Hs.201897 | polymerase (DNA directed), alpha 2 (70kD subunit)                        | Homo sapiens polymerase (DNA directed), alpha 2 (70kD subunit) (POLA2), mRNA [NM_002689]                                          | 4.60679 | down | 4.95227  | down | 415.58380   | 1982.39360  | 433.80743   | 1894.37920  | Detected    | Detected    | Detected    | Detected    |
| 4982 | A_33_P3370305 | TMEM106A    | Hs.536474 | transmembrane protein 106A                                               | Homo sapiens transmembrane protein 106A (TMEM106A), mRNA [NM_145041]                                                              | 4.59681 | down | 3.06683  | down | 5.57180     | 26.52067    | 7.45980     | 20.17356    | Compromised | Detected    | Compromised | Detected    |
| 4983 | A_33_P3258117 | HELLS       | Hs.655830 | helicase, lymphoid-specific                                              | Homo sapiens helicase, lymphoid-specific (HELLS), mRNA [NM_018063]                                                                | 4.59491 | down | 5.54712  | down | 79.99876    | 380.62173   | 58.06229    | 284.00577   | Detected    | Detected    | Detected    | Detected    |
| 4984 | A_33_P3298102 | hCG_1793639 |           | hCG1793639                                                               | PREDICTED: Homo sapiens hCG1793639 (LOC645263), mRNA [XM_001726534]                                                               | 4.59471 | down | 1.87103  | down | 13.92915    | 66.26987    | 3.62458     | 5.98003     | Detected    | Detected    | Compromised | Compromised |
| 4985 | A_33_P3641427 | MYEF2       | Hs.6638   | myelin expression factor 2                                               | Homo sapiens myelin expression factor 2 (MYEF2), mRNA [NM_016132]                                                                 | 4.59378 | down | 3.27234  | down | 8.12736     | 38.65916    | 7.59356     | 21.91135    | Compromised | Detected    | Compromised | Detected    |
| 4986 | A_24_P15877   |             |           |                                                                          | FKSG41 [Source:UniProtKB/T/EMBL/ACC/G9B2771] [ENST00000413847]                                                                    | 4.59311 | down | 5.15039  | down | 27.37787    | 130.20848   | 3.48743     | 15.83837    | Detected    | Detected    | Compromised | Compromised |
| 4987 | A_32_P120791  | LOC727916   | Hs.706850 | hypothetical protein LOC727916                                           | PREDICTED: Homo sapiens hypothetical protein LOC727916 (LOC727916), miscRNA [XR_039953]                                           | 4.59213 | down | 4.16899  | down | 53.48153    | 254.30273   | 43.69270    | 160.62193   | Detected    | Detected    | Detected    | Detected    |
| 4988 | A_33_P3404729 | LOC642350   | Hs.632647 | similar to Coagulation factor V precursor (Activated protein C cofactor) | PREDICTED: Homo sapiens similar to Coagulation factor V precursor (Activated protein C cofactor) (LOC642350), miscRNA [XR_041338] | 4.59166 | down | 6.03695  | down | 14.27679    | 67.87863    | 8.64606     | 46.02578    | Detected    | Detected    | Compromised | Detected    |
| 4989 | A_23_P214798  | SYNCRIP     | Hs.571177 | synaptotagmin binding, cytoplasmic RNA interacting protein               | Homo sapiens synaptotagmin binding, cytoplasmic RNA interacting protein (SYNCRIP), transcript variant 1, mRNA [NM_006372]         | 4.58641 | down | 4.36381  | down | 3577.69650  | 16990.63500 | 2512.76510  | 9669.03800  | Detected    | Detected    | Detected    | Detected    |
| 4990 | A_23_P204702  | TMBIM6      | Hs.708025 | transmembrane BAX inhibitor motif containing 6                           | Homo sapiens transmembrane BAX inhibitor motif containing 6 (TMBIM6), transcript variant 1, mRNA [NM_003217]                      | 4.58542 | down | 4.53334  | down | 4795.31350  | 22768.22700 | 4798.39200  | 19181.36700 | Detected    | Detected    | Detected    | Detected    |
| 4991 | A_23_P410625  | ZNF367      | Hs.494557 | zinc finger protein 367                                                  | Homo sapiens zinc finger protein 367 (ZNF367), mRNA [NM_153695]                                                                   | 4.58166 | down | 2.86888  | down | 2.89397     | 13.72936    | 7.01531     | 17.74702    | Compromised | Compromised | Compromised | Detected    |
| 4992 | A_24_P337239  | FGF5        | Hs.37055  | fibroblast growth factor 5                                               | Homo sapiens fibroblast growth factor 5 (FGF5), transcript variant 1, mRNA [NM_004464]                                            | 4.57302 | down | 1.19570  | down | 5.87650     | 27.82625    | 2.83158     | 2.98551     | Compromised | Detected    | Compromised | Compromised |
| 4993 | A_23_P350574  | FCRLB       | Hs.517422 | Fc receptor-like B                                                       | Homo sapiens Fc receptor-like B (FCRLB), mRNA [NM_001002901]                                                                      | 4.56569 | down | 4.98208  | down | 352.37366   | 1665.87730  | 299.68570   | 1316.56510  | Detected    | Detected    | Detected    | Detected    |
| 4994 | A_23_P45799   | ORC1L       | Hs.17908  | origin recognition complex, subunit 1-like (yeast)                       | Homo sapiens origin recognition complex, subunit 1-like (yeast) (ORC1L), mRNA [NM_004153]                                         | 4.56285 | down | 6.84130  | down | 30.27161    | 143.02261   | 23.49678    | 141.74663   | Detected    | Detected    | Detected    | Detected    |
| 4995 | A_33_P3280418 | MGC72080    | Hs.507862 | MGC72080 pseudogene                                                      | Homo sapiens MGC72080 pseudogene (MGC72080), non-coding RNA [NR_002822]                                                           | 4.56163 | down | 6.01834  | down | 193.90529   | 915.88920   | 172.86429   | 917.37616   | Detected    | Detected    | Detected    | Detected    |
| 4996 | A_23_P389987  | TLX2        | Hs.168586 | T-cell leukemia homeobox 2                                               | Homo sapiens T-cell leukemia homeobox 2 (TLX2), mRNA [NM_016170]                                                                  | 4.56042 | down | 4.91624  | down | 44.07448    | 208.12553   | 40.50041    | 175.57297   | Detected    | Detected    | Detected    | Detected    |

|      |               |              |           |                                                              |                                                                                                                                                                                                                                                                                                       |         |      |          |      |             |             |             |             |             |             |             |             |
|------|---------------|--------------|-----------|--------------------------------------------------------------|-------------------------------------------------------------------------------------------------------------------------------------------------------------------------------------------------------------------------------------------------------------------------------------------------------|---------|------|----------|------|-------------|-------------|-------------|-------------|-------------|-------------|-------------|-------------|
| 4997 | A_32_P380675  | GRIP2        | Hs.517819 | glutamate receptor interacting protein 2                     | Glutamate receptor-interacting protein 2 (GRIP2 protein) [Source:UniProtKB/Swiss-Prot;Acc:Q9C0E4] [ENST0000443613]                                                                                                                                                                                    | 4.55566 | down | 1.17303  | down | 4.34818     | 20.51126    | 2.49403     | 2.57974     | Compromised | Detected    | Compromised | Compromised |
| 4998 | A_33_P3229725 | ARSA         | Hs.88251  | arylsulfatase A                                              | Homo sapiens arylsulfatase A (ARSA), transcript variant 1, mRNA [NM_000487]                                                                                                                                                                                                                           | 4.55455 | down | 4.97760  | down | 1960.64390  | 9246.49700  | 1680.44570  | 7375.81640  | Detected    | Detected    | Detected    | Detected    |
| 4999 | A_33_P3544856 | LOC100292680 | Hs.391695 | hypothetical LOC100292680                                    | Homo sapiens cDNA FLJ33297 fis, clone BNGH42001406 [AK090616]                                                                                                                                                                                                                                         | 4.55398 | down | 7.34624  | down | 8.87600     | 41.85446    | 4.52442     | 29.30852    | Compromised | Detected    | Compromised | Detected    |
| 5000 | A_32_P114284  | IKZF2        | Hs.604950 | IKAROS family zinc finger 2 (Helios)                         | Homo sapiens IKAROS family zinc finger 2 (Helios) (IKZF2), transcript variant 2, mRNA [NM_001079526]                                                                                                                                                                                                  | 4.55096 | down | 4.15741  | down | 183.10570   | 862.85565   | 154.60490   | 566.77640   | Detected    | Detected    | Detected    | Detected    |
| 5001 | A_33_P3315733 |              |           |                                                              | Trafficking protein particle complex subunit 10 (Transport protein particle subunit TMEM1)(TRAPP subunit TMEM1)(Trafficking protein particle complex subunit TMEM1)(Epilepsy holoprosencephaly candidate 1 protein)(EHOC-1)(Protein GT334) [Source:UniProtKB/Swiss-Prot;Acc:P48553] [ENST00000380221] | 4.55096 | down | 4.42864  | down | 111.11552   | 523.61340   | 85.56742    | 334.15192   | Detected    | Detected    | Detected    | Detected    |
| 5002 | A_32_P196142  | LOC100130938 | Hs.710069 | hypothetical LOC100130938                                    | PREDICTED: Homo sapiens hypothetical LOC100130938 (LOC100130938), mRNA [XM_001720237]                                                                                                                                                                                                                 | 4.54489 | down | 4.65630  | down | 1107.07290  | 5209.94200  | 1258.51460  | 5167.31250  | Detected    | Detected    | Detected    | Detected    |
| 5003 | A_33_P3225507 | OR10G2       | Hs.554580 | olfactory receptor, family 10, subfamily G, member 2         | Homo sapiens olfactory receptor, family 10, subfamily G, member 2 (OR10G2), mRNA [NM_001005466]                                                                                                                                                                                                       | 4.53174 | down | 2.20840  | down | 47.05341    | 220.79518   | 33.61902    | 65.46801    | Detected    | Detected    | Detected    | Detected    |
| 5004 | A_23_P87351   | RRM1         | Hs.445705 | ribonucleotide reductase M1                                  | Homo sapiens ribonucleotide reductase M1 (RRM1), mRNA [NM_0010033]                                                                                                                                                                                                                                    | 4.52815 | down | 4.21489  | down | 7833.72100  | 36730.11300 | 6160.22800  | 22895.39600 | Detected    | Detected    | Detected    | Detected    |
| 5005 | A_23_P303210  | IKBIP        | Hs.252543 | IKBKB interacting protein                                    | Homo sapiens IKBKB interacting protein (IKBIP), transcript variant 1, mRNA [NM_153687]                                                                                                                                                                                                                | 4.52397 | down | 4.88737  | down | 480.37527   | 2250.26400  | 400.22476   | 1724.82410  | Detected    | Detected    | Detected    | Detected    |
| 5006 | A_33_P3291092 | THSD1        | Hs.325667 | thrombospondin, type I, domain containing 1                  | Homo sapiens thrombospondin, type I, domain containing 1 (THSD1), transcript variant 2, mRNA [NM_199263]                                                                                                                                                                                              | 4.51972 | down | 2.06555  | down | 9.17102     | 42.92023    | 12.13744    | 22.10692    | Compromised | Detected    | Compromised | Detected    |
| 5007 | A_32_P163089  | C12orf75     | Hs.368938 | chromosome 12 open reading frame 75                          | Homo sapiens chromosome 12 open reading frame 75 (C12orf75), mRNA [NM_001145199]                                                                                                                                                                                                                      | 4.51472 | down | 4.41816  | down | 5469.39200  | 25568.35500 | 4796.12800  | 18685.19000 | Detected    | Detected    | Detected    | Detected    |
| 5008 | A_32_P7015    | TSPAN15      | Hs.499941 | tetraspanin 15                                               | Homo sapiens tetraspanin 15 (TSPAN15), mRNA [NM_012339]                                                                                                                                                                                                                                               | 4.51279 | down | 13.52915 | down | 11.02969    | 51.53963    | 2.93143     | 34.97155    | Compromised | Detected    | Compromised | Detected    |
| 5009 | A_32_P918263  |              |           |                                                              |                                                                                                                                                                                                                                                                                                       | 4.51276 | down | 4.04882  | down | 267.69394   | 1250.87340  | 187.08669   | 667.93900   | Detected    | Detected    | Detected    | Detected    |
| 5010 | A_23_P93690   | MCM7         | Hs.438720 | minichromosome maintenance complex component 7               | Homo sapiens minichromosome maintenance complex component 7 (MCM7), transcript variant 2, mRNA [NM_182776]                                                                                                                                                                                            | 4.50952 | down | 4.68434  | down | 6916.26460  | 32294.97500 | 8675.46000  | 35834.95300 | Detected    | Detected    | Detected    | Detected    |
| 5011 | A_33_P3284129 | LYPD1        | Hs.719231 | LY6/PLAUR domain containing 1                                | Homo sapiens LY6/PLAUR domain containing 1 (LYPD1), transcript variant 1, mRNA [NM_144586]                                                                                                                                                                                                            | 4.50684 | down | 1.85106  | down | 2.77338     | 12.94237    | 8.06536     | 13.16462    | Compromised | Compromised | Compromised | Detected    |
| 5012 | A_33_P3329352 | LOC644992    |           | hypothetical LOC644992                                       | PREDICTED: Homo sapiens hypothetical LOC644992 (LOC644992), mRNA [XM_001717333]                                                                                                                                                                                                                       | 4.50677 | down | 3.90407  | down | 76.94813    | 359.08417   | 37.69082    | 129.75331   | Detected    | Detected    | Detected    | Detected    |
| 5013 | A_24_P3783    | HIST1H2BM    | Hs.182432 | histone cluster 1, H2bm                                      | Homo sapiens histone cluster 1, H2bm (HIST1H2BM), mRNA [NM_003521]                                                                                                                                                                                                                                    | 4.50042 | down | 4.40084  | down | 307.96744   | 1435.12950  | 363.77070   | 1411.65520  | Detected    | Detected    | Detected    | Detected    |
| 5014 | A_33_P3257330 | DCBLD1       | Hs.658304 | discoidin, CUB and LCCL domain containing 1                  | Homo sapiens discoidin, CUB and LCCL domain containing 1 (DCBLD1), mRNA [NM_173674]                                                                                                                                                                                                                   | 4.50017 | down | 4.53250  | down | 67.11993    | 312.76157   | 32.62805    | 130.40501   | Detected    | Detected    | Detected    | Detected    |
| 5015 | A_23_P166779  | LOH3CR2A     | Hs.591661 | loss of heterozygosity, 3, chromosomal region 2, gene A      | Homo sapiens loss of heterozygosity, 3, chromosomal region 2, gene A (LOH3CR2A), non-coding RNA [NR_024065]                                                                                                                                                                                           | 4.49663 | down | 4.77085  | down | 167.67834   | 780.72424   | 100.77600   | 423.95407   | Detected    | Detected    | Detected    | Detected    |
| 5016 | A_32_P12994   | LOC440900    | Hs.662205 | hypothetical LOC440900                                       | PREDICTED: Homo sapiens hypothetical LOC440900 (LOC440900), miscRNA [XR_041709]                                                                                                                                                                                                                       | 4.49558 | down | 4.91045  | down | 31.67730    | 147.45746   | 24.28995    | 105.17532   | Detected    | Detected    | Detected    | Detected    |
| 5017 | A_33_P3239322 | LOC100132474 | Hs.676024 | hypothetical protein LOC100132474                            | Homo sapiens cDNA FLJ43170 fis, clone FCBBF3004847, [AK125160]                                                                                                                                                                                                                                        | 4.49213 | down | 1.17782  | down | 5.71118     | 26.56509    | 2.40374     | 2.49650     | Compromised | Detected    | Compromised | Compromised |
| 5018 | A_23_P168610  | TSPAN13      | Hs.364544 | tetraspanin 13                                               | Homo sapiens tetraspanin 13 (TSPAN13), mRNA [NM_014399]                                                                                                                                                                                                                                               | 4.48611 | down | 4.42517  | down | 358.88655   | 1666.16590  | 347.43594   | 1355.72070  | Detected    | Detected    | Detected    | Detected    |
| 5019 | A_33_P3422888 |              |           |                                                              | Protein OLEC16A [Source:UniProtKB/Swiss-Prot;Acc:Q2KHT3] [ENST00000409552]                                                                                                                                                                                                                            | 4.48513 | down | 4.63583  | down | 26.84907    | 124.69170   | 26.99679    | 110.35822   | Detected    | Detected    | Detected    | Detected    |
| 5020 | A_24_P244699  | NUDT15       | Hs.144407 | nudix (nucleoside diphosphate linked moiety X)-type motif 15 | Homo sapiens nudix (nucleoside diphosphate linked moiety X)-type motif 15 (NUDT15), mRNA [NM_018283]                                                                                                                                                                                                  | 4.48313 | down | 4.42814  | down | 168.44261   | 781.92710   | 147.66917   | 576.60254   | Detected    | Detected    | Detected    | Detected    |
| 5021 | A_33_P3280845 | THY1         | Hs.644697 | Thy-1 cell surface antigen                                   | Homo sapiens Thy-1 cell surface antigen (THY1), mRNA [NM_006288]                                                                                                                                                                                                                                      | 4.48070 | down | 3.68552  | down | 18913.14600 | 87749.11000 | 13449.04100 | 43707.47000 | Detected    | Detected    | Detected    | Detected    |
| 5022 | A_24_P10214   | STXBP6       | Hs.508958 | syntaxin binding protein 6 (amisyn)                          | Homo sapiens syntaxin binding protein 6 (amisyn) (STXBP6), mRNA [NM_014178]                                                                                                                                                                                                                           | 4.47940 | down | 5.40021  | down | 182.04918   | 844.38770   | 172.94989   | 823.56274   | Detected    | Detected    | Detected    | Detected    |
| 5023 | A_33_P3279730 |              |           |                                                              | D-dopachrome decarboxylase (EC 4.1.1.84)(D-dopachrome tautomerase)(Phenylpyruvate tautomerase II) [Source:UniProtKB/Swiss-Prot;Acc:P30046] [ENST00000430101]                                                                                                                                          | 4.47294 | down | 4.13579  | down | 50.48250    | 233.81213   | 68.81451    | 250.95956   | Detected    | Detected    | Detected    | Detected    |
| 5024 | A_24_P397107  | CDC25A       | Hs.437705 | cell division cycle 25 homolog A (S. pombe)                  | Homo sapiens cell division cycle 25 homolog A (S. pombe) (CDC25A), transcript variant 1, mRNA [NM_001789]                                                                                                                                                                                             | 4.46766 | down | 5.26022  | down | 131.95741   | 610.44540   | 126.09592   | 584.88450   | Detected    | Detected    | Detected    | Detected    |



|      |               |              |           |                                                                                                      |                                                                                                                                                                           |         |      |          |      |             |             |             |             |             |          |             |             |
|------|---------------|--------------|-----------|------------------------------------------------------------------------------------------------------|---------------------------------------------------------------------------------------------------------------------------------------------------------------------------|---------|------|----------|------|-------------|-------------|-------------|-------------|-------------|----------|-------------|-------------|
| 5025 | A_33_P3267375 | SGCD         | Hs.387207 | sarcoglycan, delta (35kDa dystrophin-associated glycoprotein)                                        | Homo sapiens sarcoglycan, delta (35kDa dystrophin-associated glycoprotein) (SGCD), transcript variant 1, mRNA [NM_000337]                                                 | 4.46409 | down | 4.79692  | down | 410.96070   | 1899.61700  | 226.99168   | 960.14810   | Detected    | Detected | Detected    | Detected    |
| 5026 | A_24_P49747   | LOC646993    | Hs.591080 | similar to high mobility group box 3                                                                 | PREDICTED: Homo sapiens similar to high mobility group box 3 (LOC646993), mRNA [XM_529695]                                                                                | 4.46362 | down | 4.73201  | down | 160.52905   | 741.94855   | 37.17392    | 155.11348   | Detected    | Detected | Detected    | Detected    |
| 5027 | A_33_P3387164 | TCP11        | Hs.435371 | t-complex 11 homolog (mouse)                                                                         | Homo sapiens t-complex 11 homolog (mouse) (TCP11), transcript variant 2, mRNA [NM_018679]                                                                                 | 4.45426 | down | 1.35851  | down | 4.79983     | 22.13778    | 7.32468     | 8.77437     | Compromised | Detected | Compromised | Compromised |
| 5028 | A_23_P111041  | HIST1H2BI    | Hs.553506 | histone cluster 1, H2bi                                                                              | Homo sapiens histone cluster 1, H2bi (HIST1H2BI), mRNA [NM_003525]                                                                                                        | 4.44803 | down | 4.53043  | down | 268.51025   | 1236.69180  | 310.05075   | 1238.61840  | Detected    | Detected | Detected    | Detected    |
| 5029 | A_33_P3296940 | FNDC3B       | Hs.159430 | fibronectin type III domain containing 3B                                                            | Homo sapiens fibronectin type III domain containing 3B (FNDC3B), transcript variant 1, mRNA [NM_022763]                                                                   | 4.44759 | down | 4.03569  | down | 143.04219   | 658.75270   | 167.86288   | 597.36280   | Detected    | Detected | Detected    | Detected    |
| 5030 | A_33_P3275998 | RABEP1       | Hs.592121 | rabaptin, RAB GTPase binding effector protein 1                                                      | Homo sapiens rabaptin, RAB GTPase binding effector protein 1 (RABEP1), transcript variant 1, mRNA [NM_004703]                                                             | 4.44640 | down | 4.66180  | down | 260.47473   | 1199.24370  | 217.55586   | 894.31300   | Detected    | Detected | Detected    | Detected    |
| 5031 | A_33_P3294072 | LOC100132878 | Hs.710997 | similar to Zinc finger protein 816A                                                                  | PREDICTED: Homo sapiens similar to Zinc finger protein 816A (LOC100132878), miscRNA [XR_039398]                                                                           | 4.44048 | down | 13.26997 | down | 3.85614     | 17.73030    | 2.49958     | 29.24840    | Compromised | Detected | Compromised | Detected    |
| 5032 | A_24_P40626   | GREM2        | Hs.98206  | gremlin 2, cysteine knot superfamily, homolog (Xenopus laevis)                                       | Homo sapiens gremlin 2, cysteine knot superfamily, homolog (Xenopus laevis) (GREM2), mRNA [NM_022468]                                                                     | 4.43586 | down | 4.28679  | down | 3289.13300  | 15107.50200 | 2932.63840  | 11085.51400 | Detected    | Detected | Detected    | Detected    |
| 5033 | A_33_P3234697 | LXN          | Hs.478067 | latexin                                                                                              | Homo sapiens latexin (LXN), mRNA [NM_020165]                                                                                                                              | 4.43218 | down | 4.67260  | down | 204.84123   | 940.08720   | 173.78930   | 716.05554   | Detected    | Detected | Detected    | Detected    |
| 5034 | A_33_P3373364 | CLIC4        | Hs.440544 | chloride intracellular channel 4                                                                     | Homo sapiens chloride intracellular channel 4 (CLIC4), nuclear gene encoding mitochondrial protein, mRNA [NM_013943]                                                      | 4.43053 | down | 4.14939  | down | 903.82074   | 4146.40100  | 833.44090   | 3049.46780  | Detected    | Detected | Detected    | Detected    |
| 5035 | A_23_P120002  | SP110        | Hs.145150 | SP110 nuclear body protein                                                                           | Homo sapiens SP110 nuclear body protein (SP110), transcript variant b, mRNA [NM_004510]                                                                                   | 4.42805 | down | 4.44597  | down | 549.88110   | 2521.24240  | 387.31268   | 1518.42740  | Detected    | Detected | Detected    | Detected    |
| 5036 | A_33_P3263217 | LRRRC4       | Hs.655003 | leucine rich repeat containing 4                                                                     | Homo sapiens leucine rich repeat containing 4 (LRRRC4), mRNA [NM_022143]                                                                                                  | 4.42077 | down | 1.06305  | down | 4.56210     | 20.88315    | 11.34156    | 10.63141    | Compromised | Detected | Compromised | Compromised |
| 5037 | A_32_P189204  | GAS2L3       | Hs.20575  | growth arrest-specific 2 like 3                                                                      | Homo sapiens growth arrest-specific 2 like 3 (GAS2L3), mRNA [NM_174942]                                                                                                   | 4.41818 | down | 3.97096  | down | 35.17792    | 160.93350   | 22.25418    | 77.92430    | Detected    | Detected | Detected    | Detected    |
| 5038 | A_32_P191527  | SETD8        | Hs.443735 | SET domain containing (lysine methyltransferase) 8                                                   | Homo sapiens SET domain containing (lysine methyltransferase) 8 (SETD8), mRNA [NM_020382]                                                                                 | 4.41753 | down | 4.52333  | down | 71.10564    | 325.24942   | 51.28594    | 204.56067   | Detected    | Detected | Detected    | Detected    |
| 5039 | A_24_P40094   | ATCAY        | Hs.418055 | ataxia, cerebellar, Cayman type                                                                      | Homo sapiens ataxia, cerebellar, Cayman type (ATCAY), mRNA [NM_033064]                                                                                                    | 4.41730 | down | 1.02055  | down | 9.59126     | 43.86983    | 6.63278     | 5.96894     | Compromised | Detected | Compromised | Compromised |
| 5040 | A_33_P3223923 | PDIA3        | Hs.591095 | protein disulfide isomerase family A, member 3                                                       | Homo sapiens protein disulfide isomerase family A, member 3 (PDIA3), mRNA [NM_005313]                                                                                     | 4.40653 | down | 4.81978  | down | 286.47205   | 1307.11120  | 212.61816   | 903.63556   | Detected    | Detected | Detected    | Detected    |
| 5041 | A_23_P357929  | SLC35D1      | Hs.213642 | solute carrier family 35 (UDP-glucuronic acid/UDP-N-acetylgalactosamine dual transporter), member D1 | Homo sapiens solute carrier family 35 (UDP-glucuronic acid/UDP-N-acetylgalactosamine dual transporter), member D1 (SLC35D1), mRNA [NM_015139]                             | 4.39346 | down | 4.39293  | down | 68.23728    | 310.42870   | 53.08312    | 205.62512   | Detected    | Detected | Detected    | Detected    |
| 5042 | A_32_P15799   | HMG2         | Hs.181163 | high-mobility group nucleosomal binding domain 2                                                     | Homo sapiens high-mobility group nucleosomal binding domain 2 (HMG2), mRNA [NM_005517]                                                                                    | 4.39215 | down | 3.93753  | down | 21575.49600 | 98123.01600 | 10546.88700 | 36619.56200 | Detected    | Detected | Detected    | Detected    |
| 5043 | A_32_P208350  | TDRD9        | Hs.21454  | tudor domain containing 9                                                                            | Homo sapiens tudor domain containing 9 (TDRD9), mRNA [NM_153046]                                                                                                          | 4.38833 | down | 2.60787  | down | 17.74113    | 80.61459    | 17.18819    | 39.52587    | Detected    | Detected | Detected    | Detected    |
| 5044 | A_24_P51201   |              | Hs.35804  |                                                                                                      | Probable E3 ubiquitin-protein ligase HERC3 (EC 6.3.2.-)(HECT domain and ROC1-like domain-containing protein 3) [Source:UniProtKB/Swiss-Prot;Acc:Q15034] [ENST00000407637] | 4.37376 | down | 4.87225  | down | 21.17841    | 95.91395    | 5.73438     | 24.63660    | Detected    | Detected | Compromised | Detected    |
| 5045 | A_33_P3368445 | LOC648822    | Hs.710955 | similar to hCG2040565                                                                                | PREDICTED: Homo sapiens similar to hCG2040565 (LOC648822), mRNA [XM_001716780]                                                                                            | 4.37285 | down | 7.40903  | down | 430.96520   | 1951.36940  | 3.16628     | 20.68597    | Detected    | Detected | Compromised | Detected    |
| 5046 | A_23_P39116   | LIG1         | Hs.1770   | ligase I, DNA, ATP-dependent                                                                         | Homo sapiens ligase I, DNA, ATP-dependent (LIG1), mRNA [NM_000234]                                                                                                        | 4.37236 | down | 4.90716  | down | 1743.32960  | 7892.74800  | 1793.52400  | 7760.73200  | Detected    | Detected | Detected    | Detected    |
| 5047 | A_23_P129075  | WDR76        | Hs.250154 | WD repeat domain 76                                                                                  | Homo sapiens WD repeat domain 76 (WDR76), mRNA [NM_024908]                                                                                                                | 4.36562 | down | 3.89743  | down | 53.76137    | 243.02423   | 57.13434    | 196.35481   | Detected    | Detected | Detected    | Detected    |
| 5048 | A_33_P3436316 | ASXL1        | Hs.374043 | additional sex combs like 1 (Drosophila)                                                             | Homo sapiens additional sex combs like 1 (Drosophila) (ASXL1), transcript variant 2, mRNA [NM_001164603]                                                                  | 4.36232 | down | 4.73408  | down | 251.85645   | 1136.73380  | 204.08989   | 851.96740   | Detected    | Detected | Detected    | Detected    |
| 5049 | A_32_P100430  | LOC100128737 | Hs.721809 | hypothetical LOC100128737                                                                            | PREDICTED: Homo sapiens hypothetical LOC100128737 (LOC100128737), mRNA [XM_001715932]                                                                                     | 4.35949 | down | 4.78046  | down | 210.49495   | 950.18970   | 234.54007   | 988.67285   | Detected    | Detected | Detected    | Detected    |
| 5050 | A_23_P300056  | CDC42        | Hs.467637 | cell division cycle 42 (GTP binding protein, 25kDa)                                                  | Homo sapiens cell division cycle 42 (GTP binding protein, 25kDa) (CDC42), transcript variant 2, mRNA [NM_044472]                                                          | 4.35893 | down | 3.86047  | down | 109.17782   | 492.77332   | 60.26164    | 205.13826   | Detected    | Detected | Detected    | Detected    |
| 5051 | A_23_P205959  | ALDH1A3      | Hs.459538 | aldehyde dehydrogenase 1 family, member A3                                                           | Homo sapiens aldehyde dehydrogenase 1 family, member A3 (ALDH1A3), mRNA [NM_000693]                                                                                       | 4.34849 | down | 3.91021  | down | 208.54344   | 939.00590   | 173.49884   | 598.22186   | Detected    | Detected | Detected    | Detected    |
| 5052 | A_33_P3390092 |              |           |                                                                                                      |                                                                                                                                                                           | 4.34525 | down | 4.03782  | down | 7.77245     | 34.97081    | 7.64273     | 27.21205    | Compromised | Detected | Compromised | Detected    |
| 5053 | A_23_P216920  | NEK6         | Hs.197071 | NIMA (never in mitosis gene a)-related kinase 6                                                      | Homo sapiens NIMA (never in mitosis gene a)-related kinase 6 (NEK6), transcript variant 2, mRNA [NM_014397]                                                               | 4.34324 | down | 4.55403  | down | 2306.44850  | 10372.67200 | 2336.03780  | 9380.82700  | Detected    | Detected | Detected    | Detected    |
| 5054 | A_23_P395374  | HIST1H4D     | Hs.248179 | histone cluster 1, H4d                                                                               | Homo sapiens histone cluster 1, H4d (HIST1H4D), mRNA [NM_003539]                                                                                                          | 4.34009 | down | 4.25620  | down | 1161.45530  | 5219.56300  | 252.62883   | 948.13610   | Detected    | Detected | Detected    | Detected    |

|      |               |              |           |                                                                       |                                                                                                                                                                                                                   |         |      |         |      |             |              |             |              |             |          |             |             |
|------|---------------|--------------|-----------|-----------------------------------------------------------------------|-------------------------------------------------------------------------------------------------------------------------------------------------------------------------------------------------------------------|---------|------|---------|------|-------------|--------------|-------------|--------------|-------------|----------|-------------|-------------|
| 5055 | A_33_P3390013 | ADAMTS1      | Hs.643357 | ADAM metallopeptidase with thrombospondin type 1 motif, 1             | Homo sapiens ADAM metallopeptidase with thrombospondin type 1 motif, 1 (ADAMTS1), mRNA [NM_006988]                                                                                                                | 4.33355 | down | 4.08942 | down | 320.86462   | 1439.79030   | 232.13419   | 837.07790    | Detected    | Detected | Detected    | Detected    |
| 5056 | A_24_P243396  | TCOF1        | Hs.519672 | Treacher Collins-Franceschetti syndrome 1                             | Homo sapiens Treacher Collins-Franceschetti syndrome 1 (TCOF1), transcript variant 3, mRNA [NM_001008857]                                                                                                         | 4.32964 | down | 4.31941 | down | 117.56401   | 527.05860    | 107.63834   | 409.97464    | Detected    | Detected | Detected    | Detected    |
| 5057 | A_23_P152282  | DPEP1        | Hs.109    | dipeptidase 1 (renal)                                                 | Homo sapiens dipeptidase 1 (renal) (DPEP1), transcript variant 1, mRNA [NM_004413]                                                                                                                                | 4.32963 | down | 4.21869 | down | 7.82363     | 35.07455     | 7.00571     | 26.06125     | Compromised | Detected | Compromised | Detected    |
| 5058 | A_33_P3318763 | LOC100128994 | Hs.453788 | hypothetical LOC100128994                                             | PREDICTED: Homo sapiens hypothetical LOC100128994 (LOC100128994), mRNA [XM_001717144]                                                                                                                             | 4.31309 | down | 3.70774 | down | 54.19221    | 242.02377    | 53.84109    | 176.03090    | Detected    | Detected | Detected    | Detected    |
| 5059 | A_23_P423074  | FAM169A      | Hs.91662  | family with sequence similarity 169, member A                         | Homo sapiens family with sequence similarity 169, member A (FAM169A), mRNA [NM_015566]                                                                                                                            | 4.31263 | down | 2.66643 | down | 4.55305     | 20.33189     | 2.34208     | 5.50678      | Compromised | Detected | Compromised | Compromised |
| 5060 | A_24_P921321  | PTPRJ        | Hs.318547 | protein tyrosine phosphatase, receptor type, J                        | Homo sapiens protein tyrosine phosphatase, receptor type, J (PTPRJ), transcript variant 1, mRNA [NM_002843]                                                                                                       | 4.30054 | down | 4.15283 | down | 331.86783   | 1477.81910   | 230.61170   | 844.48310    | Detected    | Detected | Detected    | Detected    |
| 5061 | A_23_P139547  | TUBA1A       | Hs.654422 | tubulin, alpha 1a                                                     | Homo sapiens tubulin, alpha 1a (TUBA1A), mRNA [NM_006009]                                                                                                                                                         | 4.29967 | down | 4.01356 | down | 13557.09900 | 60357.94500  | 18273.39800 | 64671.76000  | Detected    | Detected | Detected    | Detected    |
| 5062 | A_23_P69537   | NMU          | Hs.418367 | neuromedin U                                                          | Homo sapiens neuromedin U (NMU), mRNA [NM_006681]                                                                                                                                                                 | 4.29906 | down | 8.46142 | down | 7.94597     | 35.37153     | 3.35202     | 25.01012     | Compromised | Detected | Compromised | Detected    |
| 5063 | A_33_P3271657 | HHIP1        | Hs.288522 | HHIP-like 1                                                           | Homo sapiens HHIP-like 1 (HHIP1), transcript variant 1, mRNA [NM_001127258]                                                                                                                                       | 4.28159 | down | 5.28068 | down | 215.76305   | 956.56555    | 210.84135   | 981.77330    | Detected    | Detected | Detected    | Detected    |
| 5064 | A_33_P3328958 |              |           |                                                                       |                                                                                                                                                                                                                   | 4.28052 | down | 3.76139 | down | 6.46318     | 28.64680     | 3.34601     | 11.09791     | Compromised | Detected | Compromised | Compromised |
| 5065 | A_23_P113825  | NACC2        | Hs.112895 | NACC family member 2, BEN and BTB (POZ) domain containing             | Homo sapiens NACC family member 2, BEN and BTB (POZ) domain containing (NACC2), mRNA [NM_144653]                                                                                                                  | 4.27787 | down | 4.17557 | down | 2208.61430  | 9783.18900   | 1584.71720  | 5834.90040   | Detected    | Detected | Detected    | Detected    |
| 5066 | A_32_P25357   | CDH15        | Hs.148090 | cadherin 15, type 1, M-cadherin (myotubule)                           | Homo sapiens cadherin 15, type 1, M-cadherin (myotubule) (CDH15), mRNA [NM_004933]                                                                                                                                | 4.27668 | down | 3.31864 | down | 22.61115    | 100.12960    | 20.82790    | 60.94959     | Detected    | Detected | Detected    | Detected    |
| 5067 | A_32_P41487   | HMG2         | Hs.181163 | high-mobility group nucleosomal binding domain 2                      | Homo sapiens high-mobility group nucleosomal binding domain 2 (HMG2), mRNA [NM_005517]                                                                                                                            | 4.27465 | down | 3.17169 | down | 42604.16800 | 188575.67000 | 38202.47300 | 106843.47000 | Detected    | Detected | Detected    | Detected    |
| 5068 | A_23_P35205   | RCAN3        | Hs.656799 | RCAN family member 3                                                  | Calcipressin-3 (Regulator of calcineurin 3)/Down syndrome candidate region 1-like protein 2/Myocyte-enriched calcineurin-interacting protein 3(MCIP-3) [Source:UniProtKB/Swiss-Prot;Acc:Q9UKA8] [ENST00000374395] | 4.27272 | down | 4.12529 | down | 321.35263   | 1421.73830   | 260.73883   | 948.47400    | Detected    | Detected | Detected    | Detected    |
| 5069 | A_23_P259272  | WSB2         | Hs.719911 | WD repeat and SOCS box-containing 2                                   | Homo sapiens WD repeat and SOCS box-containing 2 (WSB2), mRNA [NM_018639]                                                                                                                                         | 4.26937 | down | 4.27102 | down | 6392.00830  | 28257.52300  | 4682.63130  | 17635.48400  | Detected    | Detected | Detected    | Detected    |
| 5070 | A_23_P212800  | FGF5         | Hs.37055  | fibroblast growth factor 5                                            | Homo sapiens fibroblast growth factor 5 (FGF5), transcript variant 1, mRNA [NM_004464]                                                                                                                            | 4.26640 | down | 4.08437 | down | 371.24854   | 1640.06020   | 315.40643   | 1135.95400   | Detected    | Detected | Detected    | Detected    |
| 5071 | A_33_P3218356 | TMEM167B     | Hs.82933  | transmembrane protein 167B                                            | Homo sapiens transmembrane protein 167B (TMEM167B), mRNA [NM_020141]                                                                                                                                              | 4.26618 | down | 4.15481 | down | 337.39203   | 1490.41280   | 334.93080   | 1227.07710   | Detected    | Detected | Detected    | Detected    |
| 5072 | A_33_P3224105 | C15orf23     | Hs.525796 | chromosome 15 open reading frame 23                                   | Homo sapiens chromosome 15 open reading frame 23 (C15orf23), transcript variant 2, mRNA [NM_001142761]                                                                                                            | 4.26515 | down | 4.33094 | down | 4369.40100  | 19296.97300  | 4102.99700  | 15669.27500  | Detected    | Detected | Detected    | Detected    |
| 5073 | A_23_P206661  | NQO1         | Hs.406515 | NAD(P)H dehydrogenase, quinone 1                                      | Homo sapiens NAD(P)H dehydrogenase, quinone 1 (NQO1), transcript variant 1, mRNA [NM_000903]                                                                                                                      | 4.26253 | down | 3.66023 | down | 303.08707   | 1337.72840   | 195.31755   | 630.39770    | Detected    | Detected | Detected    | Detected    |
| 5074 | A_23_P85783   | PHGDH        | Hs.487296 | phosphoglycerate dehydrogenase                                        | Homo sapiens phosphoglycerate dehydrogenase (PHGDH), mRNA [NM_006623]                                                                                                                                             | 4.26041 | down | 4.70117 | down | 1275.19620  | 5625.51100   | 1339.16260  | 5551.42530   | Detected    | Detected | Detected    | Detected    |
| 5075 | A_33_P3244728 | LRP2         | Hs.657729 | low density lipoprotein-related protein 2                             | Homo sapiens low density lipoprotein-related protein 2 (LRP2), mRNA [NM_004525]                                                                                                                                   | 4.25888 | down | 5.90223 | down | 583.19740   | 2571.84080   | 190.76208   | 992.82770    | Detected    | Detected | Detected    | Detected    |
| 5076 | A_32_P831181  | BRI3BP       | Hs.596464 | BRI3 binding protein                                                  | Homo sapiens BRI3 binding protein (BRI3BP), mRNA [NM_008626]                                                                                                                                                      | 4.25817 | down | 5.02753 | down | 53.35552    | 235.25317    | 58.58858    | 259.73642    | Detected    | Detected | Detected    | Detected    |
| 5077 | A_33_P3280805 | LMO7         | Hs.207631 | LIM domain 7                                                          | Homo sapiens LIM domain 7 (LMO7), transcript variant 2, mRNA [NM_015842]                                                                                                                                          | 4.25295 | down | 5.15996 | down | 41.05179    | 180.78215    | 52.77922    | 240.14589    | Detected    | Detected | Detected    | Detected    |
| 5078 | A_24_P259154  | MGC16703     | Hs.585006 | tubulin, alpha pseudogene                                             | Homo sapiens tubulin, alpha pseudogene (MGC16703), non-coding RNA [NR_003608]                                                                                                                                     | 4.24690 | down | 2.52806 | down | 482.56976   | 2122.09770   | 75.48191    | 168.26550    | Detected    | Detected | Detected    | Detected    |
| 5079 | A_23_P91590   | RANBP1       | Hs.24763  | RAN binding protein 1                                                 | Homo sapiens RAN binding protein 1 (RANBP1), mRNA [NM_002882]                                                                                                                                                     | 4.24606 | down | 4.78266 | down | 8336.71200  | 36653.42000  | 7187.89550  | 30313.53100  | Detected    | Detected | Detected    | Detected    |
| 5080 | A_23_P325040  | TMPO         | Hs.113355 | thymopoietin                                                          | Homo sapiens thymopoietin (TMPO), transcript variant 1, mRNA [NM_003276]                                                                                                                                          | 4.24568 | down | 4.17001 | down | 102.42580   | 450.28763    | 80.07113    | 294.42773    | Detected    | Detected | Detected    | Detected    |
| 5081 | A_33_P3407937 | PLCXD1       | Hs.522568 | phosphatidylinositol-specific phospholipase C, X domain containing 1  | Homo sapiens phosphatidylinositol-specific phospholipase C, X domain containing 1 (PLCXD1), transcript variant 1, mRNA [NM_018390]                                                                                | 4.24394 | down | 5.95474 | down | 91.25652    | 401.02032    | 85.85397    | 450.80524    | Detected    | Detected | Detected    | Detected    |
| 5082 | A_23_P115519  | LCE3D        | Hs.244349 | late cornified envelope 3D                                            | Homo sapiens late cornified envelope 3D (LCE3D), mRNA [NM_032563]                                                                                                                                                 | 4.23941 | down | 8.98598 | down | 28.68508    | 125.91992    | 17.07352    | 135.28632    | Detected    | Detected | Detected    | Detected    |
| 5083 | A_24_P319942  | SSR3         | Hs.518346 | signal sequence receptor, gamma (translocon-associated protein gamma) | Homo sapiens signal sequence receptor, gamma (translocon-associated protein gamma) (SSR3), mRNA [NM_007107]                                                                                                       | 4.23918 | down | 5.64747 | down | 99.63514    | 437.34814    | 109.68317   | 546.20980    | Detected    | Detected | Detected    | Detected    |

|      |               |              |           |                                                                                    |                                                                                                                                                  |         |      |         |      |             |             |            |             |             |             |             |             |
|------|---------------|--------------|-----------|------------------------------------------------------------------------------------|--------------------------------------------------------------------------------------------------------------------------------------------------|---------|------|---------|------|-------------|-------------|------------|-------------|-------------|-------------|-------------|-------------|
| 5084 | A_33_P3382271 |              |           |                                                                                    | Homo sapiens cDNA clone IMAGE:5562656. [BC033643]                                                                                                | 4.23458 | down | 3.77949 | down | 60.44880    | 265.05170   | 60.32363   | 201.04176   | Detected    | Detected    | Detected    | Detected    |
| 5085 | A_33_P3293958 | LOC100133479 |           | hypothetical protein LOC100133479                                                  | hypothetical LOC100133479 (LOC100133479). mRNA [XM_001717908]                                                                                    | 4.23134 | down | 3.28153 | down | 29.32807    | 128.49760   | 33.80766   | 97.82661    | Detected    | Detected    | Detected    | Detected    |
| 5086 | A_23_P62607   | IL2RA1       | Hs.110915 | interleukin 22 receptor, alpha 1                                                   | Homo sapiens interleukin 22 receptor, alpha 1 (IL2RA1). mRNA [NM_021258]                                                                         | 4.23083 | down | 4.11058 | down | 38.50855    | 168.70030   | 26.88339   | 97.44350    | Detected    | Detected    | Detected    | Detected    |
| 5087 | A_23_P138706  | ADRA2A       | Hs.249159 | adrenergic, alpha-2A-, receptor                                                    | Homo sapiens adrenergic, alpha-2A-, receptor (ADRA2A). mRNA [NM_000881]                                                                          | 4.22788 | down | 9.45882 | down | 9.42170     | 41.24627    | 3.56301    | 29.71798    | Compromised | Detected    | Compromised | Detected    |
| 5088 | A_33_P3222109 | XG           | Hs.179675 | Xg blood group                                                                     | Homo sapiens Xg blood group (XG). transcript variant 2. mRNA [NM_001141919]                                                                      | 4.21595 | down | 4.02814 | down | 622.17664   | 2716.08030  | 442.00623  | 1569.99660  | Detected    | Detected    | Detected    | Detected    |
| 5089 | A_32_P192823  | PRPS1L1      | Hs.169284 | phosphoribosyl pyrophosphate synthetase 1-like 1                                   | Homo sapiens phosphoribosyl pyrophosphate synthetase 1-like 1 (PRPS1L1). mRNA [NM_175886]                                                        | 4.21344 | down | 3.91706 | down | 631.76807   | 2756.30570  | 623.39730  | 2153.22970  | Detected    | Detected    | Detected    | Detected    |
| 5090 | A_23_P67771   | BARD1        | Hs.591642 | BRCA1 associated RING domain 1                                                     | Homo sapiens BRCA1 associated RING domain 1 (BARD1). mRNA [NM_004465]                                                                            | 4.20839 | down | 4.28596 | down | 460.69882   | 2007.54970  | 412.85117  | 1560.29810  | Detected    | Detected    | Detected    | Detected    |
| 5091 | A_33_P3309031 | LOC728530    | Hs.659020 | hypothetical LOC728530                                                             | PREDICTED: Homo sapiens hypothetical LOC728530. mRNA [XM_001127675]                                                                              | 4.20749 | down | 1.19764 | down | 4.95968     | 21.60779    | 2.86470    | 3.02531     | Compromised | Detected    | Compromised | Compromised |
| 5092 | A_23_P63521   | LCE2C        | Hs.553713 | late cornified envelope 2C                                                         | Homo sapiens late cornified envelope 2C (LCE2C). mRNA [NM_178429]                                                                                | 4.20376 | down | 6.00603 | down | 19.64014    | 85.49013    | 11.85671   | 62.79385    | Detected    | Detected    | Compromised | Detected    |
| 5093 | A_23_P56505   | ITGA4        | Hs.440955 | integrin, alpha 4 (antigen CD49D, alpha 4 subunit of VLA-4 receptor)               | Homo sapiens integrin, alpha 4 (antigen CD49D, alpha 4 subunit of VLA-4 receptor) (ITGA4). mRNA [NM_000885]                                      | 4.20224 | down | 4.71250 | down | 61.73326    | 268.61676   | 46.28966   | 192.35397   | Detected    | Detected    | Detected    | Detected    |
| 5094 | A_24_P376120  | MYPN         | Hs.55205  | myopalladin                                                                        | Homo sapiens myopalladin (MYPN). mRNA [NM_032578]                                                                                                | 4.19850 | down | 6.35629 | down | 6.69271     | 29.09572    | 2.78283    | 15.59751    | Compromised | Detected    | Compromised | Detected    |
| 5095 | A_24_P156490  | KCNMA1       | Hs.144795 | potassium large conductance calcium-activated channel, subfamily M, alpha member 1 | Homo sapiens potassium large conductance calcium-activated channel, subfamily M, alpha member 1 (KCNMA1). transcript variant 2. mRNA [NM_002247] | 4.19337 | down | 3.96418 | down | 277.34824   | 1204.26500  | 185.66580  | 649.00890   | Detected    | Detected    | Detected    | Detected    |
| 5096 | A_23_P355517  | SYNPO2L      | Hs.645273 | synaptopodin 2-like                                                                | Homo sapiens synaptopodin 2-like (SYNPO2L). transcript variant 2. mRNA [NM_024875]                                                               | 4.19199 | down | 2.34508 | down | 9.86973     | 42.84084    | 8.74944    | 18.09269    | Compromised | Detected    | Compromised | Detected    |
| 5097 | A_33_P3346826 | IL32         | Hs.943    | interleukin 32                                                                     | Homo sapiens interleukin 32 (IL32). transcript variant 4. mRNA [NM_001012633]                                                                    | 4.19014 | down | 4.62824 | down | 60.08030    | 260.67145   | 55.96246   | 228.39061   | Detected    | Detected    | Detected    | Detected    |
| 5098 | A_23_P167096  | VEGFC        | Hs.435215 | vascular endothelial growth factor C                                               | Homo sapiens vascular endothelial growth factor C (VEGFC). mRNA [NM_005429]                                                                      | 4.18984 | down | 4.15525 | down | 10963.04200 | 47562.11300 | 9239.17100 | 33852.84400 | Detected    | Detected    | Detected    | Detected    |
| 5099 | A_33_P3351087 |              |           |                                                                                    | cGMP-dependent protein kinase 1, beta isozyme (cGK 1 beta)(cGKI-beta)(EC 2.7.11.12) [Source:UniProtKB/Swiss-ProtAcc:P14619] [ENST00000373976]    | 4.18356 | down | 2.89636 | down | 26.90071    | 116.53132   | 14.61953   | 37.33798    | Detected    | Detected    | Compromised | Detected    |
| 5100 | A_33_P3392245 | FAM178A      | Hs.447458 | family with sequence similarity 178, member A                                      | Homo sapiens family with sequence similarity 178, member A (FAM178A). transcript variant 2. mRNA [NM_001136123]                                  | 4.17730 | down | 1.60359 | down | 9.40668     | 40.68789    | 5.21380    | 7.37247     | Compromised | Detected    | Compromised | Compromised |
| 5101 | A_24_P926960  | MEGF6        | Hs.593645 | multiple EGF-like-domains 6                                                        | Homo sapiens multiple EGF-like-domains 6 (MEGF6). mRNA [NM_001409]                                                                               | 4.17486 | down | 4.24945 | down | 281.90063   | 1218.62740  | 325.07016  | 1218.07900  | Detected    | Detected    | Detected    | Detected    |
| 5102 | A_33_P3407299 | ANP32E       | Hs.656466 | acidic (leucine-rich) nuclear phosphoprotein 32 family, member E                   | Homo sapiens acidic (leucine-rich) nuclear phosphoprotein 32 family, member E (ANP32E). transcript variant 1. mRNA [NM_030920]                   | 4.16875 | down | 3.65858 | down | 390.04410   | 1683.65250  | 277.51678  | 895.29663   | Detected    | Detected    | Detected    | Detected    |
| 5103 | A_23_P132910  | RBM47        | Hs.518727 | RNA binding motif protein 47                                                       | Homo sapiens RNA binding motif protein 47 (RBM47). transcript variant 2. mRNA [NM_019027]                                                        | 4.16812 | down | 3.80970 | down | 33.11991    | 142.94289   | 19.92333   | 66.92962    | Detected    | Detected    | Detected    | Detected    |
| 5104 | A_23_P433785  | P2RX5        | Hs.408615 | purinergic receptor P2X, ligand-gated ion channel, 5                               | Homo sapiens purinergic receptor P2X, ligand-gated ion channel, 5 (P2RX5). transcript variant 1. mRNA [NM_002561]                                | 4.16779 | down | 5.05332 | down | 108.52860   | 468.36410   | 115.11179  | 512.93430   | Detected    | Detected    | Detected    | Detected    |
| 5105 | A_33_P3281785 | NKX3-1       | Hs.55999  | NK3 homeobox 1                                                                     | Homo sapiens NK3 homeobox 1 (NKX3-1). mRNA [NM_006167]                                                                                           | 4.16630 | down | 6.59694 | down | 2.32629     | 10.03570    | 4.50406    | 26.20068    | Compromised | Compromised | Compromised | Detected    |
| 5106 | A_23_P366216  | HIST1H2BH    | Hs.247815 | histone cluster 1, H2bh                                                            | Homo sapiens histone cluster 1, H2bh (HIST1H2BH). mRNA [NM_003524]                                                                               | 4.15571 | down | 4.08912 | down | 622.90010   | 2680.38000  | 741.87250  | 2675.00780  | Detected    | Detected    | Detected    | Detected    |
| 5107 | A_24_P342632  | AK5          | Hs.559718 | adenylate kinase 5                                                                 | Homo sapiens adenylate kinase 5 (AK5). transcript variant 1. mRNA [NM_174858]                                                                    | 4.15522 | down | 3.21017 | down | 40.43916    | 173.99213   | 30.84461   | 87.31172    | Detected    | Detected    | Detected    | Detected    |
| 5108 | A_24_P694186  | EMB          | Hs.561411 | embigin homolog (mouse)                                                            | Homo sapiens embigin homolog (mouse) (EMB). mRNA [NM_198449]                                                                                     | 4.15484 | down | 7.00172 | down | 11.82061    | 50.85430    | 5.01686    | 30.97437    | Compromised | Detected    | Compromised | Detected    |
| 5109 | A_33_P3219651 | BMPER        | Hs.660998 | BMP binding endothelial regulator                                                  | Homo sapiens BMP binding endothelial regulator (BMPER). mRNA [NM_133468]                                                                         | 4.15365 | down | 4.24079 | down | 701.65894   | 3017.79170  | 412.56277  | 1542.77550  | Detected    | Detected    | Detected    | Detected    |
| 5110 | A_23_P110266  | C4orf31      | Hs.709520 | chromosome 4 open reading frame 31                                                 | Homo sapiens chromosome 4 open reading frame 31 (C4orf31). mRNA [NM_024574]                                                                      | 4.14664 | down | 5.65484 | down | 21.75164    | 93.39444    | 8.78769    | 43.81885    | Detected    | Detected    | Compromised | Detected    |
| 5111 | A_23_P87769   | C12orf48     | Hs.330663 | chromosome 12 open reading frame 48                                                | Homo sapiens chromosome 12 open reading frame 48 (C12orf48). mRNA [NM_017915]                                                                    | 4.14654 | down | 4.00960 | down | 690.75930   | 2965.82520  | 521.31670  | 1843.18150  | Detected    | Detected    | Detected    | Detected    |
| 5112 | A_23_P337270  |              | Hs.506115 |                                                                                    | Serine/threonine-protein kinase Nek10 (EC 2.7.11.1)(NimA-related protein kinase 10) [Source:UniProtKB/Swiss-ProtAcc:Q6ZWH5] [ENST00000383770]    | 4.14613 | down | 3.98962 | down | 12.39888    | 53.23028    | 13.00825   | 45.76311    | Compromised | Detected    | Compromised | Detected    |
| 5113 | A_33_P3256293 |              |           |                                                                                    |                                                                                                                                                  | 4.14269 | down | 2.41673 | down | 5.36284     | 23.00438    | 7.01970    | 14.95934    | Compromised | Detected    | Compromised | Detected    |

|      |               |           |           |                                                                                                          |                                                                                                                                                                                                          |         |      |         |      |             |             |            |             |             |          |             |             |
|------|---------------|-----------|-----------|----------------------------------------------------------------------------------------------------------|----------------------------------------------------------------------------------------------------------------------------------------------------------------------------------------------------------|---------|------|---------|------|-------------|-------------|------------|-------------|-------------|----------|-------------|-------------|
| 5114 | A_33_P3243524 | RAPGEF6   | Hs.483329 | Rap guanine nucleotide exchange factor (GEF) 6                                                           | Homo sapiens Rap guanine nucleotide exchange factor (GEF) 6 (RAPGEF6), transcript variant 5, mRNA [NM_001164389]                                                                                         | 4.14267 | down | 3.36642 | down | 12.84413    | 55.09579    | 11.18836   | 33.21243    | Detected    | Detected | Compromised | Detected    |
| 5115 | A_23_P156826  | C6orf105  | Hs.126409 | chromosome 6 open reading frame 105                                                                      | Homo sapiens chromosome 6 open reading frame 105 (C6orf105), transcript variant 2, mRNA [NM_032744]                                                                                                      | 4.13812 | down | 3.96915 | down | 330.42178   | 1415.80820  | 223.17432  | 781.10060   | Detected    | Detected | Detected    | Detected    |
| 5116 | A_23_P70480   | HIST1H4L  | Hs.533295 | histone cluster 1, H4l                                                                                   | Homo sapiens histone cluster 1, H4l (HIST1H4L), mRNA [NM_003546]                                                                                                                                         | 4.13334 | down | 4.16270 | down | 4069.09670  | 17415.36100 | 3905.88480 | 14337.06200 | Detected    | Detected | Detected    | Detected    |
| 5117 | A_33_P3299285 | FCRLB     | Hs.517422 | Fc receptor-like B                                                                                       | Homo sapiens Fc receptor-like B (FCRLB), mRNA [NM_001002901]                                                                                                                                             | 4.13212 | down | 4.53147 | down | 38.55246    | 164.95206   | 54.47829   | 217.68490   | Detected    | Detected | Detected    | Detected    |
| 5118 | A_23_P342138  | ADAMTSL1  | Hs.522019 | ADAMTS-like 1                                                                                            | Homo sapiens ADAMTS-like 1 (ADAMTSL1), transcript variant 4, mRNA [NM_001040272]                                                                                                                         | 4.12763 | down | 4.82643 | down | 531.52550   | 2271.73680  | 465.98035  | 1983.16690  | Detected    | Detected | Detected    | Detected    |
| 5119 | A_33_P3215883 | FLT1      | Hs.594454 | fms-related tyrosine kinase 1 (vascular endothelial growth factor/vascular permeability factor receptor) | Homo sapiens fms-related tyrosine kinase 1 (vascular endothelial growth factor/vascular permeability factor receptor) (FLT1), transcript variant 1, mRNA [NM_002019]                                     | 4.12179 | down | 7.45216 | down | 6.89830     | 29.44157    | 3.37186    | 22.15731    | Compromised | Detected | Compromised | Detected    |
| 5120 | A_23_P10305   | CTPS2     | Hs.227049 | CTP synthase II                                                                                          | Homo sapiens CTP synthase II (CTPS2), transcript variant 2, mRNA [NM_175859]                                                                                                                             | 4.11375 | down | 4.33865 | down | 54.16229    | 230.71088   | 44.44841   | 170.04990   | Detected    | Detected | Detected    | Detected    |
| 5121 | A_32_P95729   | FANCI     | Hs.513126 | Fanconi anemia, complementation group 1                                                                  | Homo sapiens Fanconi anemia, complementation group 1 (FANCI), transcript variant 2, mRNA [NM_018193]                                                                                                     | 4.11238 | down | 3.65477 | down | 763.60620   | 3251.58900  | 795.07324  | 2562.31250  | Detected    | Detected | Detected    | Detected    |
| 5122 | A_23_P24903   | P2RY2     | Hs.339    | purinergic receptor P2Y, G-protein coupled, 2                                                            | Homo sapiens purinergic receptor P2Y, G-protein coupled, 2 (P2RY2), transcript variant 1, mRNA [NM_176072]                                                                                               | 4.11214 | down | 6.11951 | down | 4.72663     | 20.12577    | 2.54075    | 13.71020    | Compromised | Detected | Compromised | Detected    |
| 5123 | A_32_P72341   | TRIM59    | Hs.212957 | tripartite motif-containing 59                                                                           | Homo sapiens tripartite motif-containing 59 (TRIM59), mRNA [NM_173084]                                                                                                                                   | 4.11144 | down | 3.72007 | down | 477.01443   | 2030.75920  | 284.53458  | 933.36633   | Detected    | Detected | Detected    | Detected    |
| 5124 | A_23_P126727  | NOL9      | Hs.59425  | nucleolar protein 9                                                                                      | Homo sapiens nucleolar protein 9 (NOL9), mRNA [NM_024654]                                                                                                                                                | 4.10907 | down | 3.87162 | down | 406.83920   | 1731.01030  | 364.22330  | 1243.44380  | Detected    | Detected | Detected    | Detected    |
| 5125 | A_23_P407840  | FNDC1     | Hs.520525 | fibronectin type III domain containing 1                                                                 | Homo sapiens fibronectin type III domain containing 1 (FNDC1), mRNA [NM_032532]                                                                                                                          | 4.10761 | down | 3.54755 | down | 65.02814    | 276.58203   | 54.06905   | 169.13869   | Detected    | Detected | Detected    | Detected    |
| 5126 | A_33_P328839  | C14orf37  | Hs.535420 | chromosome 14 open reading frame 37                                                                      | Homo sapiens chromosome 14 open reading frame 37 (C14orf37), mRNA [NM_001001872]                                                                                                                         | 4.10182 | down | 4.00274 | down | 197.68538   | 839.62320   | 142.67120  | 503.56930   | Detected    | Detected | Detected    | Detected    |
| 5127 | A_24_P111242  | SVIP      | Hs.349096 | small VCP/p97-interacting protein                                                                        | Homo sapiens small VCP/p97-interacting protein (SVIP), mRNA [NM_148893]                                                                                                                                  | 4.10108 | down | 2.99680 | down | 20.07874    | 85.26444    | 14.26625   | 37.69934    | Detected    | Detected | Detected    | Detected    |
| 5128 | A_33_P3250895 | PSMB11    | Hs.508918 | proteasome (prosome, macropain) subunit, beta type, 11                                                   | Homo sapiens proteasome (prosome, macropain) subunit, beta type, 11 (PSMB11), mRNA [NM_001099780]                                                                                                        | 4.10076 | down | 3.48257 | down | 15.26583    | 64.82123    | 3.09172    | 9.49436     | Detected    | Detected | Compromised | Compromised |
| 5129 | A_23_P80570   | AADAC     | Hs.506908 | arylcetamide deacetylase (esterase)                                                                      | Homo sapiens arylacetamide deacetylase (esterase) (AADAC), mRNA [NM_001086]                                                                                                                              | 4.09567 | down | 2.74127 | down | 8.58929     | 36.42633    | 12.66254   | 30.60828    | Compromised | Detected | Compromised | Detected    |
| 5130 | A_23_P123974  | DTYMK     | Hs.471873 | deoxythymidylate kinase (thymidylate kinase)                                                             | Homo sapiens deoxythymidylate kinase (thymidylate kinase) (DTYMK), mRNA [NM_012145]                                                                                                                      | 4.09304 | down | 3.96534 | down | 10900.91700 | 46200.00800 | 7156.72700 | 25024.23200 | Detected    | Detected | Detected    | Detected    |
| 5131 | A_24_P55148   | HIST1H2BJ | Hs.656567 | histone cluster 1, H2bj                                                                                  | Homo sapiens histone cluster 1, H2bj (HIST1H2BJ), mRNA [NM_021058]                                                                                                                                       | 4.08783 | down | 5.60294 | down | 97.51760    | 412.77066   | 69.09530   | 341.37366   | Detected    | Detected | Detected    | Detected    |
| 5132 | A_23_P65506   | SPTB      | Hs.417303 | spectrin, beta, erythrocytic                                                                             | Homo sapiens spectrin, beta, erythrocytic (SPTB), transcript variant 2, mRNA [NM_000347]                                                                                                                 | 4.08461 | down | 6.86540 | down | 7.19415     | 30.42732    | 3.11248    | 18.84246    | Compromised | Detected | Compromised | Detected    |
| 5133 | A_23_P203191  | APOA1     | Hs.93194  | apolipoprotein A-1                                                                                       | Homo sapiens apolipoprotein A-1 (APOA1), mRNA [NM_000039]                                                                                                                                                | 4.07973 | down | 3.90351 | down | 6.45793     | 27.28085    | 4.96122    | 17.07688    | Compromised | Detected | Compromised | Detected    |
| 5134 | A_33_P3339376 |           | Hs.128067 |                                                                                                          | WAS/WASL-interacting protein family member 1 (Wiskott-Aldrich syndrome protein-interacting protein)(WASP-interacting protein)(Protein PRPL-2) [Source:UniProtKB/Swiss-Prot;Acc:O43516] [ENST00000409415] | 4.06854 | down | 4.25757 | down | 1367.90770  | 5762.73300  | 1049.89750 | 3941.61330  | Detected    | Detected | Detected    | Detected    |
| 5135 | A_23_P166087  | RASSF2    | Hs.631504 | Ras association (RalGDS/AF-6) domain family member 2                                                     | Homo sapiens Ras association (RalGDS/AF-6) domain family member 2 (RASSF2), transcript variant 1, mRNA [NM_014737]                                                                                       | 4.06574 | down | 3.41685 | down | 19.60497    | 82.53507    | 18.65502   | 56.20652    | Detected    | Detected | Detected    | Detected    |
| 5136 | A_24_P7965    | ESRRG     | Hs.444225 | estrogen-related receptor gamma                                                                          | Homo sapiens estrogen-related receptor gamma (ESRRG), transcript variant 2, mRNA [NM_206594]                                                                                                             | 4.06285 | down | 2.33449 | down | 8.91978     | 37.52477    | 15.82223   | 32.57055    | Compromised | Detected | Detected    | Detected    |
| 5137 | A_23_P393025  | SPATA4    | Hs.481235 | spermatogenesis associated 4                                                                             | Homo sapiens spermatogenesis associated 4 (SPATA4), mRNA [NM_144644]                                                                                                                                     | 4.06095 | down | 3.12442 | down | 33.07120    | 139.06260   | 35.00371   | 96.43813    | Detected    | Detected | Detected    | Detected    |
| 5138 | A_33_P3211818 | RUNX1     | Hs.149261 | runt-related transcription factor 1                                                                      | Homo sapiens runt-related transcription factor 1 (RUNX1), transcript variant 2, mRNA [NM_001001890]                                                                                                      | 4.05252 | down | 4.98005 | down | 23.29842    | 97.76525    | 26.70613   | 117.27628   | Detected    | Detected | Detected    | Detected    |
| 5139 | A_33_P3739260 | CAP2      | Hs.132902 | CAP, adenylate cyclase-associated protein, 2 (yeast)                                                     | Homo sapiens CAP, adenylate cyclase-associated protein, 2 (yeast) (CAP2), mRNA [NM_006366]                                                                                                               | 4.04999 | down | 4.30241 | down | 29.61644    | 124.19939   | 20.58231   | 78.08575    | Detected    | Detected | Detected    | Detected    |
| 5140 | A_23_P83098   | ALDH1A1   | Hs.76392  | aldehyde dehydrogenase 1 family, member A1                                                               | Homo sapiens aldehyde dehydrogenase 1 family, member A1 (ALDH1A1), mRNA [NM_000689]                                                                                                                      | 4.04910 | down | 4.17933 | down | 20.73626    | 86.94048    | 15.48779   | 57.07705    | Detected    | Detected | Detected    | Detected    |
| 5141 | A_33_P3225378 | OR10G3    | Hs.554581 | olfactory receptor, family 10, subfamily G, member 3                                                     | Homo sapiens olfactory receptor, family 10, subfamily G, member 3 (OR10G3), mRNA [NM_001005465]                                                                                                          | 4.04757 | down | 4.17393 | down | 9.41191     | 39.44618    | 18.08694   | 23.50762    | Compromised | Detected | Detected    | Detected    |
| 5142 | A_23_P401904  | PHF19     | Hs.460124 | PHD finger protein 19                                                                                    | Homo sapiens PHD finger protein 19 (PHF19), transcript variant 2, mRNA [NM_001009936]                                                                                                                    | 4.04559 | down | 4.20245 | down | 1946.19320  | 8152.69870  | 2070.30960 | 7671.90330  | Detected    | Detected | Detected    | Detected    |

|      |               |              |           |                                                             |                                                                                                                            |         |      |         |      |            |             |            |            |             |             |             |             |
|------|---------------|--------------|-----------|-------------------------------------------------------------|----------------------------------------------------------------------------------------------------------------------------|---------|------|---------|------|------------|-------------|------------|------------|-------------|-------------|-------------|-------------|
| 5143 | A_33_P3210085 | NET1         | Hs.25155  | neuroepithelial cell transforming 1                         | Homo sapiens neuroepithelial cell transforming 1 (NET1), transcript variant 1, mRNA [NM_001047160]                         | 4.04558 | down | 4.06108 | down | 360.36182  | 1509.56630  | 268.14664  | 960.23883  | Detected    | Detected    | Detected    | Detected    |
| 5144 | A_32_P211045  | DHFR         | Hs.648635 | dihydrofolate reductase                                     | Homo sapiens dihydrofolate reductase (DHFR), mRNA [NM_000791]                                                              | 4.03933 | down | 3.73272 | down | 1067.30530 | 4464.06600  | 475.15230  | 1563.95250 | Detected    | Detected    | Detected    | Detected    |
| 5145 | A_23_P25626   | C13orf34     | Hs.714340 | chromosome 13 open reading frame 34                         | Homo sapiens chromosome 13 open reading frame 34 (C13orf34), mRNA [NM_024808]                                              | 4.02905 | down | 3.96190 | down | 351.51706  | 1466.49850  | 286.90356  | 1002.31750 | Detected    | Detected    | Detected    | Detected    |
| 5146 | A_23_P390700  | CNTN1        | Hs.143434 | contactin 1                                                 | Homo sapiens contactin 1 (CNTN1), transcript variant 1, mRNA [NM_001843]                                                   | 4.02793 | down | 1.18602 | down | 4.43926    | 18.51506    | 2.86166    | 2.99279    | Compromised | Detected    | Compromised | Compromised |
| 5147 | A_23_P359540  | HIST1H4F     | Hs.247816 | histone cluster 1, H4f                                      | Homo sapiens histone cluster 1, H4f (HIST1H4F), mRNA [NM_003540]                                                           | 4.02420 | down | 3.28756 | down | 42.68813   | 177.87689   | 55.66727   | 161.37617  | Detected    | Detected    | Detected    | Detected    |
| 5148 | A_33_P3397733 | FAM154B      | Hs.459117 | family with sequence similarity 154, member B               | Homo sapiens family with sequence similarity 154, member B (FAM154B), mRNA [NM_001008226]                                  | 4.02201 | down | 3.49745 | down | 12.83743   | 53.46306    | 3.25652    | 10.04318   | Compromised | Detected    | Compromised | Compromised |
| 5149 | A_23_P162579  | HSPB8        | Hs.400095 | heat shock 22kDa protein 8                                  | Homo sapiens heat shock 22kDa protein 8 (HSPB8), mRNA [NM_014365]                                                          | 4.01996 | down | 4.13115 | down | 93.56341   | 389.45822   | 71.08520   | 258.94970  | Detected    | Detected    | Detected    | Detected    |
| 5150 | A_23_P47665   | HBE1         | Hs.655195 | hemoglobin, epsilon 1                                       | Homo sapiens hemoglobin, epsilon 1 (HBE1), mRNA [NM_005330]                                                                | 4.01818 | down | 8.94765 | down | 4.48288    | 18.56851    | 2.38602    | 18.82561   | Compromised | Detected    | Compromised | Detected    |
| 5151 | A_33_P3300332 | hCG_2040054  |           | hCG2040054                                                  | PREDICTED: Homo sapiens hCG2040054 (LOC644093), mRNA [XM_001725480]                                                        | 4.01307 | down | 3.34178 | down | 129.19900  | 536.86960   | 32.55016   | 95.91708   | Detected    | Detected    | Detected    | Detected    |
| 5152 | A_23_P211039  | ADAMTS1      | Hs.643357 | ADAM metalloproteinase with thrombospondin type 1 motif, 1  | Homo sapiens ADAM metalloproteinase with thrombospondin type 1 motif, 1 (ADAMTS1), mRNA [NM_006988]                        | 4.01188 | down | 3.95781 | down | 558.26170  | 2319.09940  | 480.39910  | 1676.57230 | Detected    | Detected    | Detected    | Detected    |
| 5153 | A_24_P332647  | SSH1         | Hs.199763 | slingshot homolog 1 (Drosophila)                            | Homo sapiens slingshot homolog 1 (Drosophila) (SSH1), transcript variant 3, mRNA [NM_001161331]                            | 4.01172 | down | 4.54461 | down | 206.51122  | 857.84296   | 149.85355  | 600.52185  | Detected    | Detected    | Detected    | Detected    |
| 5154 | A_33_P3229241 | HIST2H2BF    | Hs.632451 | histone cluster 2, H2bf                                     | Homo sapiens histone cluster 2, H2bf (HIST2H2BF), transcript variant 1, mRNA [NM_001024599]                                | 3.99755 | down | 3.71210 | down | 74.94844   | 310.23400   | 71.30449   | 233.40082  | Detected    | Detected    | Detected    | Detected    |
| 5155 | A_24_P191781  | PARM1        | Hs.105460 | prostate androgen-regulated mucin-like protein 1            | Homo sapiens prostate androgen-regulated mucin-like protein 1 (PARM1), mRNA [NM_015393]                                    | 3.99105 | down | 3.00085 | down | 2.27328    | 9.39450     | 4.91601    | 13.00835   | Compromised | Compromised | Compromised | Detected    |
| 5156 | A_33_P3221898 | LOC339240    | Hs.420616 | keratin pseudogene                                          | Homo sapiens keratin pseudogene (LOC339240), non-coding RNA [NR_001443]                                                    | 3.98927 | down | 6.39690 | down | 8.84978    | 36.55605    | 4.98367    | 28.11148   | Compromised | Detected    | Compromised | Detected    |
| 5157 | A_33_P3404641 | LOC150381    |           | hypothetical LOC150381                                      | Homo sapiens hypothetical LOC150381 (LOC150381), non-coding RNA [NR_027034]                                                | 3.98811 | down | 3.71283 | down | 54.05956   | 223.24013   | 47.56061   | 155.71060  | Detected    | Detected    | Detected    | Detected    |
| 5158 | A_23_P122443  | HIST1H1C     | Hs.7644   | histone cluster 1, H1c                                      | Homo sapiens histone cluster 1, H1c (HIST1H1C), mRNA [NM_005319]                                                           | 3.97740 | down | 3.82045 | down | 2330.71480 | 9598.89100  | 2705.52050 | 9114.45200 | Detected    | Detected    | Detected    | Detected    |
| 5159 | A_33_P3257808 | FANCD2       | Hs.208388 | Fanconi anemia, complementation group D2                    | Homo sapiens Fanconi anemia, complementation group D2 (FANCD2), transcript variant 2, mRNA [NM_001018115]                  | 3.97608 | down | 3.95182 | down | 45.18990   | 186.04999   | 45.28367   | 157.79900  | Detected    | Detected    | Detected    | Detected    |
| 5160 | A_33_P3259135 | D4S234E      | Hs.518595 | DNA segment on chromosome 4 (unique) 234 expressed sequence | Homo sapiens DNA segment on chromosome 4 (unique) 234 expressed sequence (D4S234E), transcript variant 1, mRNA [NM_014392] | 3.97525 | down | 2.62055 | down | 15.34606   | 63.16761    | 15.54790   | 35.92776   | Detected    | Detected    | Detected    | Detected    |
| 5161 | A_24_P248741  | ZNF501       | Hs.401045 | zinc finger protein 501                                     | Homo sapiens zinc finger protein 501 (ZNF501), mRNA [NM_145044]                                                            | 3.97349 | down | 1.00944 | down | 10.26006   | 42.21390    | 7.92068    | 7.05030    | Compromised | Detected    | Compromised | Compromised |
| 5162 | A_23_P425066  | CRYBB2       | Hs.373074 | crystallin, beta B2                                         | Homo sapiens crystallin, beta B2 (CRYBB2), mRNA [NM_000496]                                                                | 3.96647 | down | 4.20490 | down | 264.54633  | 1086.52270  | 294.65106  | 1092.51920 | Detected    | Detected    | Detected    | Detected    |
| 5163 | A_23_P27734   | NPAS1        | Hs.79564  | neuronal PAS domain protein 1                               | Homo sapiens neuronal PAS domain protein 1 (NPAS1), mRNA [NM_002517]                                                       | 3.96276 | down | 4.10195 | down | 157.13562  | 644.77075   | 246.37843  | 891.16520  | Detected    | Detected    | Detected    | Detected    |
| 5164 | A_23_P59069   | HIST1H2BO    | Hs.673856 | histone cluster 1, H2bo                                     | Homo sapiens histone cluster 1, H2bo (HIST1H2BO), mRNA [NM_003527]                                                         | 3.96150 | down | 3.81249 | down | 588.53990  | 2414.17600  | 739.42410  | 2485.81100 | Detected    | Detected    | Detected    | Detected    |
| 5165 | A_24_P166407  | HIST1H4B     | Hs.143080 | histone cluster 1, H4b                                      | Homo sapiens histone cluster 1, H4b (HIST1H4B), mRNA [NM_003544]                                                           | 3.96086 | down | 3.90042 | down | 3133.33330 | 12850.78200 | 1408.82300 | 4845.43550 | Detected    | Detected    | Detected    | Detected    |
| 5166 | A_33_P3433873 | ZWILCH       | Hs.21331  | Zwisch, kinetochore associated, homolog (Drosophila)        | Homo sapiens Zwisch, kinetochore associated, homolog (Drosophila) (ZWILCH), transcript variant 1, mRNA [NM_017975]         | 3.95750 | down | 3.97691 | down | 685.95465  | 2810.92290  | 523.43690  | 1835.58810 | Detected    | Detected    | Detected    | Detected    |
| 5167 | A_33_P3237393 | ZNF140       | Hs.181552 | zinc finger protein 140                                     | Homo sapiens zinc finger protein 140 (ZNF140), mRNA [NM_003440]                                                            | 3.95236 | down | 1.24731 | down | 4.56436    | 18.67969    | 3.07390    | 3.38067    | Compromised | Detected    | Compromised | Compromised |
| 5168 | A_33_P3261640 | LOC100134365 |           | hypothetical protein LOC100134365                           | PREDICTED: Homo sapiens similar to ankyrin repeat domain 36 (LOC100134365), mRNA [XM_001715832]                            | 3.94774 | down | 2.98486 | down | 40.21115   | 164.37189   | 19.78440   | 52.07305   | Detected    | Detected    | Detected    | Detected    |
| 5169 | A_23_P143817  | MYLK         | Hs.477375 | myosin light chain kinase                                   | Homo sapiens myosin light chain kinase (MYLK), transcript variant 1, mRNA [NM_053025]                                      | 3.94632 | down | 3.99528 | down | 2449.65970 | 10009.93200 | 1911.55980 | 6734.42300 | Detected    | Detected    | Detected    | Detected    |
| 5170 | A_24_P409661  |              |           |                                                             |                                                                                                                            | 3.94315 | down | 4.00473 | down | 1393.76150 | 5690.86700  | 1100.15770 | 3885.01930 | Detected    | Detected    | Detected    | Detected    |
| 5171 | A_33_P3331376 | EPHB2        | Hs.523329 | EPH receptor B2                                             | Homo sapiens EPH receptor B2 (EPHB2), transcript variant 2, mRNA [NM_004442]                                               | 3.94230 | down | 4.35179 | down | 23.37711   | 95.42762    | 15.60890   | 59.89710   | Detected    | Detected    | Detected    | Detected    |
| 5172 | A_33_P3286953 | ADAMTS6      | Hs.482291 | ADAM metalloproteinase with thrombospondin type 1 motif, 6  | Homo sapiens ADAM metalloproteinase with thrombospondin type 1 motif, 6 (ADAMTS6), mRNA [NM_197941]                        | 3.94049 | down | 3.78766 | down | 181.99226  | 742.56824   | 146.56259  | 489.50787  | Detected    | Detected    | Detected    | Detected    |
| 5173 | A_23_P28886   | PCNA         | Hs.147433 | proliferating cell nuclear antigen                          | Homo sapiens proliferating cell nuclear antigen (PCNA), transcript variant 1, mRNA [NM_002592]                             | 3.93942 | down | 3.66101 | down | 4267.33940 | 17406.92600 | 3028.38300 | 9776.35600 | Detected    | Detected    | Detected    | Detected    |
| 5174 | A_23_P256158  | ADRA2C       | Hs.123022 | adrenergic, alpha-2C-, receptor                             | Homo sapiens adrenergic, alpha-2C-, receptor (ADRA2C), mRNA [NM_000683]                                                    | 3.93686 | down | 4.27035 | down | 476.37760  | 1941.93440  | 462.97263  | 1743.34690 | Detected    | Detected    | Detected    | Detected    |
| 5175 | A_32_P122754  | C9orf30      | Hs.530272 | chromosome 9 open reading frame 30                          | Homo sapiens chromosome 9 open reading frame 30 (C9orf30), mRNA [NM_080655]                                                | 3.93364 | down | 3.61552 | down | 1276.97020 | 5201.25340  | 1304.90280 | 4160.20500 | Detected    | Detected    | Detected    | Detected    |

|      |               |              |           |                                                                                   |                                                                                                                                                                                          |         |  |      |         |            |             |            |            |             |              |             |             |
|------|---------------|--------------|-----------|-----------------------------------------------------------------------------------|------------------------------------------------------------------------------------------------------------------------------------------------------------------------------------------|---------|--|------|---------|------------|-------------|------------|------------|-------------|--------------|-------------|-------------|
| 5176 | A_23_P116640  | OR51B2       | Hs.680163 | olfactory receptor, family 51, subfamily B, member 2                              | Homo sapiens olfactory receptor, family 51, subfamily B, member 2 (OR51B2), mRNA [NM_033180]                                                                                             | 3.93157 |  | down | 1.17786 | 4.53532    | 18.46321    | 2.79938    | 2.90751    | Compromised | Not Detected | Compromised | Compromised |
| 5177 | A_23_P46539   | PSRC1        | Hs.405925 | proline/serine-rich coiled-coil 1                                                 | Homo sapiens proline/serine-rich coiled-coil 1 (PSRC1), transcript variant 1, mRNA [NM_032636]                                                                                           | 3.93042 |  | down | 4.04439 | 656.59110  | 2672.18530  | 577.50890  | 2059.57100 | Detected    | Detected     | Detected    | Detected    |
| 5178 | A_23_P82651   | NPTX2        | Hs.3281   | neuronal pentraxin II                                                             | Homo sapiens neuronal pentraxin II (NPTX2), mRNA [NM_002523]                                                                                                                             | 3.92355 |  | down | 4.04043 | 3557.59400 | 14453.35300 | 2555.26250 | 9103.91400 | Detected    | Detected     | Detected    | Detected    |
| 5179 | A_24_P6305    | RPL10        | Hs.534404 | ribosomal protein L10                                                             | Homo sapiens ribosomal protein L10 (RPL10), transcript variant 1, mRNA [NM_006013]                                                                                                       | 3.92140 |  | down | 6.10690 | 12.14226   | 49.30301    | 7.22529    | 38.90824   | Compromised | Detected     | Compromised | Detected    |
| 5180 | A_23_P11032   | SLC9A7       | Hs.496057 | solute carrier family 9 (sodium/hydrogen exchanger), member 7                     | Homo sapiens solute carrier family 9 (sodium/hydrogen exchanger), member 7 (SLC9A7), mRNA [NM_032591]                                                                                    | 3.92050 |  | down | 4.05986 | 129.97058  | 527.61774   | 146.92218  | 525.97340  | Detected    | Detected     | Detected    | Detected    |
| 5181 | A_33_P3897734 | LOC339894    | Hs.634263 | hypothetical protein LOC339894                                                    | Homo sapiens hypothetical protein LOC339894, mRNA (cDNA clone IMAGE:5269978) [BC038760]                                                                                                  | 3.91888 |  | down | 1.24012 | 5.54336    | 22.49410    | 7.35828    | 8.04647    | Compromised | Detected     | Compromised | Compromised |
| 5182 | A_33_P3404922 | KIAA1217     | Hs.445885 | KIAA1217                                                                          | Homo sapiens KIAA1217 (KIAA1217), transcript variant 2, mRNA [NM_001098500]                                                                                                              | 3.91885 |  | down | 1.78928 | 6.60209    | 26.79005    | 11.82033   | 18.64976   | Compromised | Detected     | Compromised | Detected    |
| 5183 | A_23_P3302    | MNS1         | Hs.444483 | meiosis-specific nuclear structural 1                                             | Homo sapiens meiosis-specific nuclear structural 1 (MNS1), mRNA [NM_018365]                                                                                                              | 3.91862 |  | down | 3.93136 | 93.27447   | 378.46808   | 68.07374   | 235.98685  | Detected    | Detected     | Detected    | Detected    |
| 5184 | A_33_P3407524 | SUV39H1      | Hs.522639 | suppressor of variegation 3-9 homolog 1 (Drosophila)                              | Homo sapiens suppressor of variegation 3-9 homolog 1 (Drosophila) (SUV39H1), mRNA [NM_003173]                                                                                            | 3.91108 |  | down | 4.52686 | 28.29967   | 114.60712   | 21.92879   | 87.53416   | Detected    | Detected     | Detected    | Detected    |
| 5185 | A_33_P3412613 | TMPO         | Hs.11355  | thymopoietin                                                                      | Homo sapiens thymopoietin (TMPO), transcript variant 2, mRNA [NM_001032283]                                                                                                              | 3.90715 |  | down | 6.90736 | 6.31337    | 25.54195    | 3.01571    | 18.36822   | Compromised | Detected     | Compromised | Detected    |
| 5186 | A_33_P3332596 |              | Hs.722593 |                                                                                   | DKFZp686I24127_r1 686 (synonym: hicc3) Homo sapiens cDNA clone DKFZp686I24127_5, mRNA sequence [BX471465]                                                                                | 3.89645 |  | down | 4.40806 | 6.47646    | 26.13003    | 6.38498    | 24.81833   | Compromised | Detected     | Compromised | Detected    |
| 5187 | A_32_P4018    | ROR1         | Hs.128753 | receptor tyrosine kinase-like orphan receptor 1                                   | Tyrosine-protein kinase transmembrane receptor ROR1 Precursor (EC 2.7.10.1)(neurotrophic tyrosine kinase, receptor-related 1) [Source:UniProtKB/Swiss-Prot;Acc:Q01973] [ENST00000371079] | 3.89633 |  | down | 4.05488 | 300.31630  | 1211.62480  | 192.30661  | 687.60260  | Detected    | Detected     | Detected    | Detected    |
| 5188 | A_23_P160934  | ANP32E       | Hs.656466 | acidic (leucine-rich) nuclear phosphoprotein 32 family, member E                  | Homo sapiens acidic (leucine-rich) nuclear phosphoprotein 32 family, member E (ANP32E), transcript variant 1, mRNA [NM_030920]                                                           | 3.88800 |  | down | 3.53078 | 189.92499  | 764.61285   | 129.73839  | 403.92905  | Detected    | Detected     | Detected    | Detected    |
| 5189 | A_32_P109604  | LOC100132733 | Hs.709909 | similar to FLJ00310 protein                                                       | PREDICTED: Homo sapiens similar to FLJ00310 protein (LOC100132733), mRNA [XM_001715342]                                                                                                  | 3.88218 |  | down | 1.95126 | 5.42426    | 21.80462    | 2.62435    | 4.51547    | Compromised | Detected     | Compromised | Compromised |
| 5190 | A_32_P75357   |              | Hs.446164 |                                                                                   | Keich-like protein 14 [Source:UniProtKB/Swiss-Prot;Acc:Q9P2G3] [ENST00000358095]                                                                                                         | 3.88155 |  | down | 3.04786 | 5.25134    | 21.10612    | 6.12600    | 16.46409   | Compromised | Detected     | Compromised | Detected    |
| 5191 | A_23_P334845  | ARHGAP19     | Hs.80305  | Rho GTPase activating protein 19                                                  | Homo sapiens Rho GTPase activating protein 19 (ARHGAP19), mRNA [NM_032900]                                                                                                               | 3.87842 |  | down | 2.20326 | 2.54511    | 10.22101    | 10.90299   | 21.18250   | Compromised | Compromised  | Compromised | Detected    |
| 5192 | A_23_P202117  | PCGF5        | Hs.500512 | polycomb group ring finger 5                                                      | Homo sapiens polycomb group ring finger 5, mRNA (cDNA clone IMAGE:3640258), complete cds. [BC023177]                                                                                     | 3.87828 |  | down | 4.15640 | 190.79765  | 766.20560   | 179.38815  | 657.47150  | Detected    | Detected     | Detected    | Detected    |
| 5193 | A_33_P3293446 | KIAA1462     | Hs.533953 | KIAA1462                                                                          | Homo sapiens KIAA1462 (KIAA1462), mRNA [NM_020848]                                                                                                                                       | 3.86874 |  | down | 3.94355 | 854.72015  | 3423.94460  | 757.26495  | 2633.29900 | Detected    | Detected     | Detected    | Detected    |
| 5194 | A_23_P510     | PLD5         | Hs.672452 | phospholipase D family, member 5                                                  | Homo sapiens phospholipase D family, member 5 (PLD5), mRNA [NM_152686]                                                                                                                   | 3.86763 |  | down | 4.19045 | 5.17320    | 20.71751    | 5.18547    | 19.16083   | Compromised | Detected     | Compromised | Detected    |
| 5195 | A_24_P84898   | FEN1         | Hs.409065 | flap structure-specific endonuclease 1                                            | Homo sapiens flap structure-specific endonuclease 1 (FEN1), mRNA [NM_004111]                                                                                                             | 3.86743 |  | down | 4.08794 | 615.32480  | 2464.11080  | 602.48730  | 2171.79170 | Detected    | Detected     | Detected    | Detected    |
| 5196 | A_33_P3407339 | C6orf204     | Hs.656959 | chromosome 6 open reading frame 204                                               | Homo sapiens chromosome 6 open reading frame 204 (C6orf204), transcript variant 2, mRNA [NM_206921]                                                                                      | 3.86320 |  | down | 4.44226 | 25.00476   | 100.02379   | 14.44568   | 56.58586   | Detected    | Detected     | Detected    | Detected    |
| 5197 | A_33_P3250555 |              |           |                                                                                   | Uncharacterized protein C18orf2 [Source:UniProtKB/Swiss-Prot;Acc:Q9BZP3] [ENST00000269201]                                                                                               | 3.86144 |  | down | 3.16921 | 19.92671   | 79.67424    | 12.27597   | 34.30616   | Detected    | Detected     | Detected    | Detected    |
| 5198 | A_32_P148476  | LOC389842    |           | similar to RAN binding protein 1                                                  | PREDICTED: Homo sapiens similar to RAN binding protein 1 (LOC389842), mRNA [XM_372200]                                                                                                   | 3.85908 |  | down | 4.29177 | 301.46000  | 1204.60990  | 256.08310  | 969.13074  | Detected    | Detected     | Detected    | Detected    |
| 5199 | A_23_P128351  | EFCAB4B      | Hs.504534 | EF-hand calcium binding domain 4B                                                 | Homo sapiens EF-hand calcium binding domain 4B (EFCAB4B), transcript variant 3, mRNA [NM_032680]                                                                                         | 3.85690 |  | down | 4.35018 | 68.50679   | 273.59310   | 62.95330   | 241.48537  | Detected    | Detected     | Detected    | Detected    |
| 5200 | A_23_P356616  | ABTB2        | Hs.23361  | ankyrin repeat and BTB (POZ) domain containing 2                                  | Homo sapiens ankyrin repeat and BTB (POZ) domain containing 2 (ABTB2), mRNA [NM_145804]                                                                                                  | 3.85648 |  | down | 3.58953 | 436.00067  | 1741.04930  | 367.96410  | 1164.68520 | Detected    | Detected     | Detected    | Detected    |
| 5201 | A_33_P3254650 | LOC728353    | Hs.621210 | hypothetical protein LOC728353                                                    | PREDICTED: Homo sapiens hypothetical protein LOC728353 (LOC728353), miscRNA [XR_041035]                                                                                                  | 3.85567 |  | down | 3.84432 | 24.96817   | 99.68270    | 19.35469   | 65.61013   | Detected    | Detected     | Detected    | Detected    |
| 5202 | A_23_P204417  | ITFG2        | Hs.446098 | integrin alpha FG-GAP repeat containing 2                                         | Homo sapiens integrin alpha FG-GAP repeat containing 2 (ITFG2), mRNA [NM_018463]                                                                                                         | 3.85499 |  | down | 4.58174 | 236.39012  | 943.59430   | 187.88979  | 759.10077  | Detected    | Detected     | Detected    | Detected    |
| 5203 | A_33_P3271121 |              |           |                                                                                   |                                                                                                                                                                                          | 3.84858 |  | down | 3.77532 | 378.02026  | 1506.42920  | 226.53757  | 754.15375  | Detected    | Detected     | Detected    | Detected    |
| 5204 | A_23_P163380  | MTHFS        | Hs.459049 | 5,10-methylenetetrahydrofolate synthetase (5-formyltetrahydrofolate cyclo-ligase) | Homo sapiens 5,10-methylenetetrahydrofolate synthetase (5-formyltetrahydrofolate cyclo-ligase) (MTHFS), mRNA [NM_006441]                                                                 | 3.84836 |  | down | 3.72155 | 1028.02870 | 4096.51170  | 1047.30640 | 3436.86550 | Detected    | Detected     | Detected    | Detected    |

|      |               |              |           |                                                                                     |                                                                                                                                                                    |         |      |          |      |             |             |             |             |             |          |             |             |
|------|---------------|--------------|-----------|-------------------------------------------------------------------------------------|--------------------------------------------------------------------------------------------------------------------------------------------------------------------|---------|------|----------|------|-------------|-------------|-------------|-------------|-------------|----------|-------------|-------------|
| 5205 | A_33_P3415843 |              |           |                                                                                     | Carnitine O-acetyltransferase (Carnitine acetylase)(EC 2.3.1.7)(Carnitine acetyltransferase)(CrAT)(CAT) [Source:UniProtKB/Swiss-Prot;Acc:P43155] [ENST00000393384] | 3.84676 | down | 3.66171  | down | 321.47500   | 1280.48740  | 261.37576   | 843.94630   | Detected    | Detected | Detected    | Detected    |
| 5206 | A_23_P255653  | TNFRSF10A    | Hs.591834 | tumor necrosis factor receptor superfamily, member 10a                              | Homo sapiens tumor necrosis factor receptor superfamily, member 10a (TNFRSF10A), mRNA [NM_003844]                                                                  | 3.84671 | down | 4.10795  | down | 88.61099    | 352.94740   | 91.94637    | 333.06207   | Detected    | Detected | Detected    | Detected    |
| 5207 | A_23_P19938   | KDELRL2      | Hs.654552 | KDEL (Lys-Asp-Glu-Leu) endoplasmic reticulum protein retention receptor 2           | Homo sapiens KDEL (Lys-Asp-Glu-Leu) endoplasmic reticulum protein retention receptor 2 (KDELRL2), transcript variant 1, mRNA [NM_006654]                           | 3.84659 | down | 3.70201  | down | 8688.83300  | 34607.48400 | 5689.05470  | 18571.34800 | Detected    | Detected | Detected    | Detected    |
| 5208 | A_23_P320829  | C14orf145    | Hs.162889 | chromosome 14 open reading frame 145                                                | Homo sapiens chromosome 14 open reading frame 145 (C14orf145), mRNA [NM_152446]                                                                                    | 3.84389 | down | 2.32335  | down | 12.44311    | 49.52603    | 12.80256    | 26.22872    | Compromised | Detected | Compromised | Detected    |
| 5209 | A_23_P353614  | C8orf46      | Hs.268869 | chromosome 8 open reading frame 46                                                  | Homo sapiens chromosome 8 open reading frame 46 (C8orf46), mRNA [NM_152765]                                                                                        | 3.84167 | down | 5.27271  | down | 13.99843    | 55.68430    | 7.76348     | 36.09570    | Detected    | Detected | Compromised | Detected    |
| 5210 | A_32_P221799  | HIST1H2AM    | Hs.134999 | histone cluster 1, H2am                                                             | Homo sapiens histone cluster 1, H2am (HIST1H2AM), mRNA [NM_003514]                                                                                                 | 3.84071 | down | 2.01269  | down | 20.67924    | 82.23918    | 36.91821    | 65.52141    | Detected    | Detected | Detected    | Detected    |
| 5211 | A_23_P399078  | TIMP3        | Hs.644633 | TIMP metalloproteinase inhibitor 3                                                  | Homo sapiens TIMP metalloproteinase inhibitor 3 (TIMP3), mRNA [NM_000362]                                                                                          | 3.83828 | down | 3.61801  | down | 11521.52800 | 45790.97700 | 10837.78900 | 34576.11000 | Detected    | Detected | Detected    | Detected    |
| 5212 | A_33_P3241661 | LOC388780    |           | hypothetical LOC388780                                                              | PREDICTED: Homo sapiens hypothetical LOC388780 (LOC388780), mRNA [XM_943910]                                                                                       | 3.83580 | down | 4.14848  | down | 75.81969    | 301.14170   | 50.15599    | 183.47500   | Detected    | Detected | Detected    | Detected    |
| 5213 | A_33_P3273822 |              |           |                                                                                     | F-box only protein 11 (Vitiligo-associated protein 1)(VIT-1) [Source:UniProtKB/Swiss-Prot;Acc:Q86XK2] [ENST00000405808]                                            | 3.83049 | down | 1.19092  | down | 25.36062    | 100.58829   | 2.34863     | 2.46640     | Detected    | Detected | Compromised | Compromised |
| 5214 | A_23_P30363   | P4HA2        | Hs.519568 | prolyl 4-hydroxylase, alpha polypeptide II                                          | Homo sapiens prolyl 4-hydroxylase, alpha polypeptide II (P4HA2), transcript variant 1, mRNA [NM_004199]                                                            | 3.82729 | down | 3.77913  | down | 12781.93000 | 50654.86300 | 8411.29200  | 28029.79300 | Detected    | Detected | Detected    | Detected    |
| 5215 | A_23_P96965   | SYNC         | Hs.712631 | syncollin, intermediate filament protein                                            | Homo sapiens syncollin, intermediate filament protein (SYNC), transcript variant 1, mRNA [NM_030786]                                                               | 3.82636 | down | 3.46812  | down | 1679.43180  | 6653.97500  | 1497.15010  | 4578.52300  | Detected    | Detected | Detected    | Detected    |
| 5216 | A_24_P39639   | EXOSC6       | Hs.660633 | exosome component 6                                                                 | Homo sapiens exosome component 6 (EXOSC6), mRNA [NM_058219]                                                                                                        | 3.82052 | down | 4.17896  | down | 472.45566   | 1869.02930  | 445.46982   | 1641.54170  | Detected    | Detected | Detected    | Detected    |
| 5217 | A_23_P334870  | TMEM217      | Hs.520101 | transmembrane protein 217                                                           | Homo sapiens transmembrane protein 217 (TMEM217), transcript variant 1, mRNA [NM_145316]                                                                           | 3.81872 | down | 1.31327  | down | 481.60257   | 1904.32040  | 246.80698   | 285.80908   | Detected    | Detected | Detected    | Detected    |
| 5218 | A_33_P3405500 | SACS         | Hs.159492 | spastic ataxia of Charlevoix-Saguenay (sacsin)                                      | Homo sapiens spastic ataxia of Charlevoix-Saguenay (sacsin) (SACS), mRNA [NM_014363]                                                                               | 3.81801 | down | 4.19625  | down | 283.24252   | 1119.77050  | 216.67580   | 801.74646   | Detected    | Detected | Detected    | Detected    |
| 5219 | A_23_P152082  | SPTBN5       | Hs.709819 | spectrin, beta, non-erythrocytic 5                                                  | Homo sapiens spectrin, beta, non-erythrocytic 5 (SPTBN5), mRNA [NM_016642]                                                                                         | 3.81438 | down | 15.70803 | down | 5.41050     | 21.36952    | 3.39958     | 47.08827    | Compromised | Detected | Compromised | Detected    |
| 5220 | A_23_P398530  | WHSC1        | Hs.113876 | Wolf-Hirschhorn syndrome candidate 1                                                | Homo sapiens Wolf-Hirschhorn syndrome candidate 1 (WHSC1), transcript variant 7, mRNA [NM_133334]                                                                  | 3.81391 | down | 3.02890  | down | 7.17742     | 28.34473    | 2.33800     | 6.24445     | Compromised | Detected | Compromised | Compromised |
| 5221 | A_33_P3350758 | RASAL2       | Hs.549729 | RAS protein activator like 2                                                        | Homo sapiens RAS protein activator like 2 (RASAL2), transcript variant 2, mRNA [NM_170832]                                                                         | 3.81278 | down | 3.95375  | down | 123.55180   | 487.78010   | 104.42902   | 364.07960   | Detected    | Detected | Detected    | Detected    |
| 5222 | A_23_P17130   | C2orf88      | Hs.720468 | chromosome 2 open reading frame 88                                                  | Homo sapiens chromosome 2 open reading frame 88 (C2orf88), transcript variant 1, mRNA [NM_001042519]                                                               | 3.80105 | down | 6.00192  | down | 13.79373    | 54.28985    | 6.57195     | 34.78159    | Detected    | Detected | Compromised | Detected    |
| 5223 | A_23_P417918  | PENK         | Hs.339831 | proenkephalin                                                                       | Homo sapiens proenkephalin (PENK), transcript variant 2, mRNA [NM_006211]                                                                                          | 3.79881 | down | 4.29323  | down | 445.45820   | 1752.22110  | 402.27747   | 1522.91470  | Detected    | Detected | Detected    | Detected    |
| 5224 | A_33_P3375899 | LOC100133500 |           | hypothetical protein LOC100133500                                                   | PREDICTED: Homo sapiens hypothetical LOC100133500 (LOC100133500), mRNA [XM_001720287]                                                                              | 3.79735 | down | 1.20925  | down | 4.75993     | 18.71606    | 2.89294     | 3.08475     | Compromised | Detected | Compromised | Compromised |
| 5225 | A_23_P250347  | CAMK4        | Hs.591269 | calcium/calmodulin-dependent protein kinase IV                                      | Homo sapiens calcium/calmodulin-dependent protein kinase IV (CAMK4), mRNA [NM_001744]                                                                              | 3.79635 | down | 2.31339  | down | 14.27065    | 56.09746    | 19.44046    | 39.65708    | Detected    | Detected | Detected    | Detected    |
| 5226 | A_23_P163306  | CGNL1        | Hs.148989 | cingulin-like 1                                                                     | Homo sapiens cingulin-like 1 (CGNL1), mRNA [NM_032866]                                                                                                             | 3.79296 | down | 3.61588  | down | 14.33167    | 56.28698    | 8.46437     | 26.98820    | Detected    | Detected | Compromised | Detected    |
| 5227 | A_33_P3407434 |              | Hs.117259 |                                                                                     | BX117604<br>Soares fetal liver, spleen, INFLS.S1<br>Homo sapiens cDNA clone IMAGE998E051013, mRNA sequence [BX117604]                                              | 3.78823 | down | 4.00163  | down | 16.92752    | 66.39913    | 7.46430     | 26.33849    | Detected    | Detected | Compromised | Detected    |
| 5228 | A_23_P124122  | PXMP2        | Hs.430299 | peroxisomal membrane protein 2, 22kDa                                               | Homo sapiens peroxisomal membrane protein 2, 22kDa (PXMP2), mRNA [NM_018663]                                                                                       | 3.78061 | down | 3.74940  | down | 966.07970   | 3781.88450  | 720.31880   | 2381.51000  | Detected    | Detected | Detected    | Detected    |
| 5229 | A_23_P252145  | C1GALT1      | Hs.592180 | core 1 synthase, glycoprotein-N-acetylgalactosamine 3-beta-galactosyltransferase, 1 | Homo sapiens core 1 synthase, glycoprotein-N-acetylgalactosamine 3-beta-galactosyltransferase, 1 (C1GALT1), mRNA [NM_020156]                                       | 3.77873 | down | 4.11757  | down | 327.45547   | 1281.24180  | 190.50627   | 691.69650   | Detected    | Detected | Detected    | Detected    |
| 5230 | A_33_P3238280 | ESYT3        | Hs.477711 | extended synaptotagmin-like protein 3                                               | Homo sapiens extended synaptotagmin-like protein 3 (ESYT3), mRNA [NM_031913]                                                                                       | 3.77846 | down | 2.86865  | down | 18.38189    | 71.91812    | 23.33554    | 59.02829    | Detected    | Detected | Detected    | Detected    |
| 5231 | A_33_P3260575 | CERCAM       | Hs.495230 | cerebral endothelial cell adhesion molecule                                         | Homo sapiens cerebral endothelial cell adhesion molecule (CERCAM), mRNA [NM_016174]                                                                                | 3.77732 | down | 3.93905  | down | 5316.37940  | 20793.72500 | 5428.62840  | 18855.91000 | Detected    | Detected | Detected    | Detected    |
| 5232 | A_23_P124905  | NPTX1        | Hs.514556 | neuronal pentraxin 1                                                                | Homo sapiens neuronal pentraxin 1 (NPTX1), mRNA [NM_002522]                                                                                                        | 3.77588 | down | 3.54620  | down | 323.95770   | 1266.60020  | 224.94357   | 703.40090   | Detected    | Detected | Detected    | Detected    |

|      |               |           |           |                                                                      |                                                                                                                                    |         |      |         |      |             |             |             |             |             |          |             |             |
|------|---------------|-----------|-----------|----------------------------------------------------------------------|------------------------------------------------------------------------------------------------------------------------------------|---------|------|---------|------|-------------|-------------|-------------|-------------|-------------|----------|-------------|-------------|
| 5233 | A_24_P374953  | TRNP1     | Hs.355747 | TMF1-regulated nuclear protein 1                                     | Homo sapiens TMF1-regulated nuclear protein 1 (TRNP1), mRNA [NM_001013642]                                                         | 3.77497 | down | 4.09507 | down | 4016.02050  | 15697.93100 | 4386.20260  | 15838.56250 | Detected    | Detected | Detected    | Detected    |
| 5234 | A_23_P12816   | HELLS     | Hs.655830 | helicase, lymphoid-specific                                          | Homo sapiens helicase, lymphoid-specific (HELLS), mRNA [NM_018063]                                                                 | 3.77275 | down | 4.54889 | down | 90.17854    | 352.28516   | 60.02296    | 240.76237   | Detected    | Detected | Detected    | Detected    |
| 5235 | A_33_P3258612 | PCNA      | Hs.147433 | proliferating cell nuclear antigen                                   | Homo sapiens proliferating cell nuclear antigen (PCNA), transcript variant 1, mRNA [NM_002592]                                     | 3.77253 | down | 3.72687 | down | 3013.90010  | 11773.21000 | 2210.71340  | 7265.10000  | Detected    | Detected | Detected    | Detected    |
| 5236 | A_24_P205589  | ACOT7     | Hs.126137 | acyl-CoA thioesterase 7                                              | Homo sapiens acyl-CoA thioesterase 7 (ACOT7), transcript variant hBACHa, mRNA [NM_007274]                                          | 3.77080 | down | 4.45089 | down | 1732.32790  | 6763.89500  | 2208.02030  | 8665.93900  | Detected    | Detected | Detected    | Detected    |
| 5237 | A_33_P3235034 |           | Hs.675838 |                                                                      | Putative uncharacterized protein [Source:UniProtKB/TrEMBL;Acc:Q9HBN7] [ENS00000321930]                                             | 3.76618 | down | 2.69762 | down | 31.18600    | 121.61682   | 40.24796    | 95.73933    | Detected    | Detected | Detected    | Detected    |
| 5238 | A_32_P113812  |           |           |                                                                      |                                                                                                                                    | 3.76520 | down | 1.65100 | down | 6.16045     | 24.01778    | 7.54128     | 10.97889    | Compromised | Detected | Compromised | Compromised |
| 5239 | A_23_P207911  | TRPV2     | Hs.279746 | transient receptor potential cation channel, subfamily V, member 2   | Homo sapiens transient receptor potential cation channel, subfamily V, member 2 (TRPV2), mRNA [NM_016113]                          | 3.76487 | down | 3.89356 | down | 5539.44200  | 21594.77300 | 6676.06250  | 23607.59200 | Detected    | Detected | Detected    | Detected    |
| 5240 | A_23_P126075  | KCNK1     | Hs.208544 | potassium channel, subfamily K, member 1                             | Homo sapiens potassium channel, subfamily K, member 1 (KCNK1), mRNA [NM_002245]                                                    | 3.76349 | down | 3.68573 | down | 296.05307   | 1153.70000  | 213.70271   | 694.54310   | Detected    | Detected | Detected    | Detected    |
| 5241 | A_23_P104372  | DNAJC9    | Hs.654694 | Dnaj (Hsp40) homolog, subfamily C, member 9                          | Homo sapiens Dnaj (Hsp40) homolog, subfamily C, member 9 (DNAJC9), mRNA [NM_015190]                                                | 3.76325 | down | 3.56651 | down | 6473.46830  | 25225.11000 | 4526.09900  | 14234.18700 | Detected    | Detected | Detected    | Detected    |
| 5242 | A_33_P3238166 | PXDN      | Hs.332197 | peroxidase homolog (Drosophila)                                      | Homo sapiens peroxidase homolog (Drosophila) (PXDN), mRNA [NM_012293]                                                              | 3.75992 | down | 3.42673 | down | 19102.00600 | 74368.77000 | 13256.16600 | 40055.66400 | Detected    | Detected | Detected    | Detected    |
| 5243 | A_23_P221134  | BNC1      | Hs.459153 | basonuclin 1                                                         | Homo sapiens basonuclin 1 (BNC1), mRNA [NM_001717]                                                                                 | 3.75955 | down | 3.68716 | down | 164.02261   | 638.51715   | 125.52583   | 408.12270   | Detected    | Detected | Detected    | Detected    |
| 5244 | A_33_P3229918 | PTCRA     | Hs.169002 | pre T-cell antigen receptor alpha                                    | Homo sapiens pre T-cell antigen receptor alpha (PTCRA), mRNA [NM_138296]                                                           | 3.75822 | down | 2.65455 | down | 6.28337     | 24.45166    | 9.99613     | 23.39850    | Compromised | Detected | Compromised | Detected    |
| 5245 | A_23_P34597   | CDA       | Hs.466910 | cytidine deaminase                                                   | Homo sapiens cytidine deaminase (CDA), mRNA [NM_001785]                                                                            | 3.75707 | down | 5.44681 | down | 132.12090   | 513.98956   | 104.37382   | 501.30154   | Detected    | Detected | Detected    | Detected    |
| 5246 | A_23_P15123   | UBFD1     | Hs.3459   | ubiquitin family domain containing 1                                 | Homo sapiens ubiquitin family domain containing 1 (UBFD1), mRNA [NM_019116]                                                        | 3.75688 | down | 3.33574 | down | 417.62885   | 1624.61600  | 408.02830   | 1200.18350  | Detected    | Detected | Detected    | Detected    |
| 5247 | A_33_P3342862 | FAM101A   | Hs.432901 | family with sequence similarity 101, member A                        | Homo sapiens family with sequence similarity 101, member A (FAM101A), mRNA [NM_181709]                                             | 3.75668 | down | 9.31460 | down | 121.66808   | 473.27554   | 43.08754    | 353.90057   | Detected    | Detected | Detected    | Detected    |
| 5248 | A_23_P61180   | PLCXD1    | Hs.522568 | phosphatidylinositol-specific phospholipase C, X domain containing 1 | Homo sapiens phosphatidylinositol-specific phospholipase C, X domain containing 1 (PLCXD1), transcript variant 1, mRNA [NM_018390] | 3.75622 | down | 3.86039 | down | 499.66818   | 1943.41640  | 495.06992   | 1685.24350  | Detected    | Detected | Detected    | Detected    |
| 5249 | A_33_P3275801 | DES       | Hs.594952 | desmin                                                               | Homo sapiens desmin (DES), mRNA [NM_001927]                                                                                        | 3.75461 | down | 4.70083 | down | 547.69434   | 2129.29900  | 388.88712   | 1611.99510  | Detected    | Detected | Detected    | Detected    |
| 5250 | A_23_P82738   | RAD54B    | Hs.30561  | RAD54 homolog B (S. cerevisiae)                                      | Homo sapiens RAD54 homolog B (S. cerevisiae) (RAD54B), mRNA [NM_012415]                                                            | 3.75130 | down | 3.76019 | down | 142.36089   | 552.97473   | 109.51458   | 363.11770   | Detected    | Detected | Detected    | Detected    |
| 5251 | A_32_P56392   | RBMX      | Hs.380118 | RNA binding motif protein, X-linked                                  | Homo sapiens RNA binding motif protein, X-linked (RBMX), transcript variant 1, mRNA [NM_002139]                                    | 3.74887 | down | 2.97373 | down | 36.16409    | 140.38203   | 19.71775    | 51.70407    | Detected    | Detected | Detected    | Detected    |
| 5252 | A_33_P3407592 |           |           |                                                                      |                                                                                                                                    | 3.74669 | down | 3.06685 | down | 34.23169    | 132.80340   | 36.08723    | 97.59156    | Detected    | Detected | Detected    | Detected    |
| 5253 | A_24_P342086  | WWP2      | Hs.408458 | WW domain containing E3 ubiquitin protein ligase 2                   | Homo sapiens WW domain containing E3 ubiquitin protein ligase 2 (WWP2), transcript variant 3, mRNA [NM_199423]                     | 3.74508 | down | 3.43682 | down | 62.00339    | 240.44150   | 56.57099    | 171.44151   | Detected    | Detected | Detected    | Detected    |
| 5254 | A_23_P114983  | TRIM63    | Hs.279709 | tripartite motif-containing 63                                       | Homo sapiens tripartite motif-containing 63 (TRIM63), mRNA [NM_032586]                                                             | 3.73993 | down | 5.62033 | down | 47.12495    | 182.49371   | 25.88433    | 128.28160   | Detected    | Detected | Detected    | Detected    |
| 5255 | A_32_P105083  | LOC348751 | Hs.471039 | hypothetical protein LOC348751                                       | PREDICTED: Homo sapiens hypothetical protein LOC348751 (LOC348751), mRNA [XM_001716816]                                            | 3.73935 | down | 2.80376 | down | 8.94348     | 34.62868    | 11.33699    | 28.02882    | Compromised | Detected | Compromised | Detected    |
| 5256 | A_23_P379789  | ST8SIA5   | Hs.465025 | ST8 alpha-N-acetylneuraminidase alpha-2,8-sialyltransferase 5        | Homo sapiens ST8 alpha-N-acetylneuraminidase alpha-2,8-sialyltransferase 5 (ST8SIA5), mRNA [NM_013305]                             | 3.73860 | down | 3.93135 | down | 71.06592    | 275.10815   | 45.94891    | 159.28772   | Detected    | Detected | Detected    | Detected    |
| 5257 | A_23_P350005  | TRIML2    | Hs.276429 | tripartite motif family-like 2                                       | Homo sapiens tripartite motif family-like 2 (TRIML2), mRNA [NM_173553]                                                             | 3.73656 | down | 2.72183 | down | 15.98617    | 61.85148    | 5.70030     | 13.68122    | Detected    | Detected | Compromised | Compromised |
| 5258 | A_33_P3394933 | P4HA2     | Hs.519568 | prolyl 4-hydroxylase, alpha polypeptide II                           | Homo sapiens prolyl 4-hydroxylase, alpha polypeptide II (P4HA2), transcript variant 2, mRNA [NM_001017973]                         | 3.73350 | down | 4.15462 | down | 698.97480   | 2702.16040  | 632.74480   | 2318.06180  | Detected    | Detected | Detected    | Detected    |
| 5259 | A_24_P405054  | C1orf144  | Hs.252967 | chromosome 1 open reading frame 144                                  | Homo sapiens chromosome 1 open reading frame 144 (C1orf144), transcript variant 2, mRNA [NM_015609]                                | 3.73337 | down | 4.02531 | down | 261.73074   | 1011.78700  | 347.85260   | 1234.69530  | Detected    | Detected | Detected    | Detected    |
| 5260 | A_33_P3280597 |           |           |                                                                      | Serine/threonine-protein phosphatase 4 regulatory subunit 1-like [Source:UniProtKB/Swiss-Prot;Acc:Q9P1A2] [ENST00000244070]        | 3.73196 | down | 3.20694 | down | 148.83548   | 575.14343   | 97.96050    | 277.01788   | Detected    | Detected | Detected    | Detected    |



|      |               |           |           |                                                             |                                                                                                                                                                                                                                                                                                                                                                         |         |      |          |      |             |             |             |             |             |             |             |             |
|------|---------------|-----------|-----------|-------------------------------------------------------------|-------------------------------------------------------------------------------------------------------------------------------------------------------------------------------------------------------------------------------------------------------------------------------------------------------------------------------------------------------------------------|---------|------|----------|------|-------------|-------------|-------------|-------------|-------------|-------------|-------------|-------------|
| 5261 | A_33_P3231833 |           |           |                                                             | Acyl-coenzyme A thioesterase 8 (EC 3.1.2.27)(Choloyl-coenzyme A thioesterase)(Acyl-CoA thioesterase 8)(Peroxisomal acyl-coenzyme A thioester hydrolase 1)(PTE-1)(Peroxisomal long-chain acyl-CoA thioesterase 1)(HIV-Nef-associated acyl-CoA thioesterase)(Thioesterase II)(hTE)(hACTEIII)(hACTE-III)(PTE-2) [Source:UniProtKB/Swiss-Prot;Acc:O14734] [ENST00000372531] | 3.72991 | down | 3.36454  | down | 95.53854    | 368.98618   | 91.19238    | 270.55136   | Detected    | Detected    | Detected    | Detected    |
| 5262 | A_23_P116902  | ART4      | Hs.655792 | ADP-ribosyltransferase 4 (Dombrock blood group)             | Homo sapiens ADP-ribosyltransferase 4 (Dombrock blood group) (ART4), mRNA [NM_021071]                                                                                                                                                                                                                                                                                   | 3.72962 | down | 1.54644  | down | 5.56126     | 21.47685    | 3.28363     | 4.47768     | Compromised | Detected    | Compromised | Compromised |
| 5263 | A_23_P17811   | SEC14L2   | Hs.335614 | SEC14-like 2 (S. cerevisiae)                                | Homo sapiens SEC14-like 2 (S. cerevisiae) (SEC14L2), transcript variant 1, mRNA [NM_012429]                                                                                                                                                                                                                                                                             | 3.72881 | down | 4.43470  | down | 643.57935   | 2484.87960  | 546.94030   | 2138.79700  | Detected    | Detected    | Detected    | Detected    |
| 5264 | A_33_P3263193 | C12orf32  | Hs.198853 | chromosome 12 open reading frame 32                         | Homo sapiens chromosome 12 open reading frame 32 (C12orf32), transcript variant 1, non-coding RNA [NR_027363]                                                                                                                                                                                                                                                           | 3.72823 | down | 3.43786  | down | 809.03326   | 3123.21900  | 438.11462   | 1328.13400  | Detected    | Detected    | Detected    | Detected    |
| 5265 | A_23_P417415  | ACOT11    | Hs.234786 | acyl-CoA thioesterase 11                                    | Homo sapiens acyl-CoA thioesterase 11 (ACOT11), transcript variant 2, mRNA [NM_147161]                                                                                                                                                                                                                                                                                  | 3.72370 | down | 4.28195  | down | 272.70764   | 1051.48860  | 246.57860   | 931.02655   | Detected    | Detected    | Detected    | Detected    |
| 5266 | A_33_P3238976 | TRMT5     | Hs.380159 | TRM5 tRNA methyltransferase 5 homolog (S. cerevisiae)       | Homo sapiens TRM5 tRNA methyltransferase 5 homolog (S. cerevisiae) (TRMT5), mRNA [NM_020810]                                                                                                                                                                                                                                                                            | 3.72217 | down | 3.93484  | down | 915.45886   | 3528.32350  | 1061.80580  | 3684.14840  | Detected    | Detected    | Detected    | Detected    |
| 5267 | A_33_P3258478 | KIR3DP1   | Hs.690615 | killer-cell Ig-like receptor                                | Homo sapiens killer-cell Ig-like receptor (KIR3DP1), mRNA [NM_001015070]                                                                                                                                                                                                                                                                                                | 3.72130 | down | 3.15913  | down | 23.74017    | 91.47687    | 14.91342    | 41.54417    | Detected    | Detected    | Detected    | Detected    |
| 5268 | A_33_P3314531 | LOC646853 |           | similar to high-mobility group nucleosomal binding domain 2 | PREDICTED: Homo sapiens similar to high-mobility group nucleosomal binding domain 2 (LOC646853), mRNA [XM_001719033]                                                                                                                                                                                                                                                    | 3.71926 | down | 2.73868  | down | 37.07333    | 142.77480   | 12.77107    | 30.84141    | Detected    | Detected    | Compromised | Detected    |
| 5269 | A_24_P221485  |           |           |                                                             |                                                                                                                                                                                                                                                                                                                                                                         | 3.71233 | down | 3.39973  | down | 43.39176    | 166.79643   | 20.70887    | 62.08211    | Detected    | Detected    | Detected    | Detected    |
| 5270 | A_23_P394323  | FAM98B    | Hs.6799   | family with sequence similarity 98, member B                | Protein FAM98B [Source:UniProtKB/Swiss-Prot;Acc:Q52LJ0] [ENST00000305752]                                                                                                                                                                                                                                                                                               | 3.71071 | down | 2.73959  | down | 6.30244     | 24.21579    | 3.28111     | 7.92631     | Compromised | Detected    | Compromised | Compromised |
| 5271 | A_33_P3235410 |           |           |                                                             | Protein-tyrosine phosphatase-like member A (Cementum attachment protein) [Source:UniProtKB/Swiss-Prot;Acc:BOYJ81] [ENST00000326961]                                                                                                                                                                                                                                     | 3.70999 | down | 3.66165  | down | 210.27188   | 807.76886   | 184.46120   | 595.59045   | Detected    | Detected    | Detected    | Detected    |
| 5272 | A_33_P3371989 | IGSF1     | Hs.22111  | immunoglobulin superfamily, member 1                        | Homo sapiens immunoglobulin superfamily, member 1 (IGSF1), transcript variant 2, mRNA [NM_205833]                                                                                                                                                                                                                                                                       | 3.70289 | down | 1.63882  | down | 4.96558     | 19.03900    | 2.99924     | 4.33418     | Compromised | Detected    | Compromised | Compromised |
| 5273 | A_33_P3531204 | PCOTH     | Hs.721128 | prostate collagen triple helix                              | Homo sapiens prostate collagen triple helix (PCOTH), transcript variant 2, mRNA [NM_001135816]                                                                                                                                                                                                                                                                          | 3.70094 | down | 5.72179  | down | 36.40070    | 139.49385   | 22.44340    | 113.23648   | Detected    | Detected    | Detected    | Detected    |
| 5274 | A_23_P163099  | POLE2     | Hs.162777 | polymerase (DNA directed), epsilon 2 (p59 subunit)          | Homo sapiens polymerase (DNA directed), epsilon 2 (p59 subunit) (POLE2), mRNA [NM_002692]                                                                                                                                                                                                                                                                               | 3.69761 | down | 3.25343  | down | 170.38876   | 652.37164   | 126.37004   | 362.53586   | Detected    | Detected    | Detected    | Detected    |
| 5275 | A_23_P6771    | LMCD1     | Hs.475353 | LIM and cysteine-rich domains 1                             | Homo sapiens LIM and cysteine-rich domains 1 (LMCD1), mRNA [NM_014583]                                                                                                                                                                                                                                                                                                  | 3.69693 | down | 3.92831  | down | 4452.59570  | 17044.63000 | 4454.90100  | 15431.52800 | Detected    | Detected    | Detected    | Detected    |
| 5276 | A_23_P47247   | TCP11L1   | Hs.655341 | t-complex 11 (mouse)-like 1                                 | Homo sapiens t-complex 11 (mouse)-like 1 (TCP11L1), transcript variant 1, mRNA [NM_018393]                                                                                                                                                                                                                                                                              | 3.69319 | down | 3.71606  | down | 299.80020   | 1146.47910  | 294.51865   | 965.07380   | Detected    | Detected    | Detected    | Detected    |
| 5277 | A_23_P81369   | ADAM19    | Hs.483944 | ADAM metallopeptidase domain 19 (meltrin beta)              | Homo sapiens ADAM metallopeptidase domain 19 (meltrin beta) (ADAM19), mRNA [NM_033274]                                                                                                                                                                                                                                                                                  | 3.69254 | down | 5.33810  | down | 13.51513    | 51.67475    | 10.29465    | 48.45785    | Compromised | Detected    | Compromised | Detected    |
| 5278 | A_23_P44436   | GKNI      | Hs.69319  | gastrokine 1                                                | Homo sapiens gastrokine 1 (GKNI), mRNA [NM_019617]                                                                                                                                                                                                                                                                                                                      | 3.68694 | down | 2.54052  | down | 10.62038    | 40.54522    | 9.54230     | 21.37673    | Compromised | Detected    | Compromised | Detected    |
| 5279 | A_24_P940275  | FRMPD4    | Hs.663678 | FERM and PDZ domain containing 4                            | Homo sapiens FERM and PDZ domain containing 4 (FRMPD4), mRNA [NM_014728]                                                                                                                                                                                                                                                                                                | 3.68547 | down | 1.92824  | down | 12.91231    | 49.27536    | 15.37892    | 26.14885    | Compromised | Detected    | Compromised | Detected    |
| 5280 | A_23_P214487  | HIST1H4C  | Hs.46423  | histone cluster 1, H4c                                      | Homo sapiens histone cluster 1, H4c (HIST1H4C), mRNA [NM_003542]                                                                                                                                                                                                                                                                                                        | 3.68516 | down | 3.59859  | down | 21490.90200 | 82005.71000 | 16907.02000 | 53649.42600 | Detected    | Detected    | Detected    | Detected    |
| 5281 | A_33_P3363637 | BLNK      | Hs.665244 | B-cell linker                                               | Homo sapiens B-cell linker (BLNK), transcript variant 1, mRNA [NM_013314]                                                                                                                                                                                                                                                                                               | 3.68248 | down | 12.26093 | down | 2.57394     | 9.81458     | 3.20717     | 34.67455    | Compromised | Compromised | Compromised | Detected    |
| 5282 | A_33_P3302125 | LCE2A     | Hs.334054 | late cornified envelope 2A                                  | Homo sapiens late cornified envelope 2A (LCE2A), mRNA [NM_178428]                                                                                                                                                                                                                                                                                                       | 3.68122 | down | 3.39736  | down | 148.26230   | 565.13890   | 134.78899   | 403.79556   | Detected    | Detected    | Detected    | Detected    |
| 5283 | A_23_P166526  | RIBCO2    | Hs.475110 | RIB43A domain with coiled-coils 2                           | Homo sapiens RIB43A domain with coiled-coils 2 (RIBCO2), mRNA [NM_015853]                                                                                                                                                                                                                                                                                               | 3.68058 | down | 3.55866  | down | 19.78241    | 75.39253    | 15.19062    | 47.66806    | Detected    | Detected    | Compromised | Detected    |
| 5284 | A_23_P429383  | HOXD9     | Hs.236646 | homeobox D9                                                 | Homo sapiens homeobox D9 (HOXD9), mRNA [NM_014213]                                                                                                                                                                                                                                                                                                                      | 3.67913 | down | 10.06876 | down | 67.95981    | 258.89886   | 25.21854    | 223.90378   | Detected    | Detected    | Detected    | Detected    |
| 5285 | A_24_P109633  | ITPK1     | Hs.308122 | inositol 1,3,4-triphosphate 5/6 kinase                      | Homo sapiens inositol 1,3,4-triphosphate 5/6 kinase (ITPK1), transcript variant 3, mRNA [NM_001142594]                                                                                                                                                                                                                                                                  | 3.67874 | down | 3.91942  | down | 22.39052    | 85.28960    | 13.96140    | 48.25214    | Detected    | Detected    | Compromised | Detected    |
| 5286 | A_23_P53126   | LMO2      | Hs.34560  | LIM domain only 2 (rhombotin-like 1)                        | Homo sapiens LIM domain only 2 (rhombotin-like 1) (LMO2), transcript variant 1, mRNA [NM_005574]                                                                                                                                                                                                                                                                        | 3.67582 | down | 3.90573  | down | 93.84444    | 357.18740   | 61.91695    | 213.24445   | Detected    | Detected    | Detected    | Detected    |
| 5287 | A_33_P3818787 | LOC344967 | Hs.534633 | acyl-CoA thioesterase 7 pseudogene                          | Homo sapiens acyl-CoA thioesterase 7 pseudogene (LOC344967), non-coding RNA [NR_027277]                                                                                                                                                                                                                                                                                 | 3.67134 | down | 3.85069  | down | 217.93270   | 828.47534   | 61.97788    | 199.51576   | Detected    | Detected    | Detected    | Detected    |

|      |               |              |           |                                                             |                                                                                                                                           |         |      |         |      |             |             |             |             |             |             |             |             |
|------|---------------|--------------|-----------|-------------------------------------------------------------|-------------------------------------------------------------------------------------------------------------------------------------------|---------|------|---------|------|-------------|-------------|-------------|-------------|-------------|-------------|-------------|-------------|
| 5288 | A_23_P12363   | ROR1         | Hs.654491 | receptor tyrosine kinase-like orphan receptor 1             | Homo sapiens receptor tyrosine kinase-like orphan receptor 1 (ROR1), transcript variant 1, mRNA [NM_005012]                               | 3.67092 | down | 4.02088 | down | 373.42627   | 1419.42630  | 264.36820   | 937.33710   | Detected    | Detected    | Detected    | Detected    |
| 5289 | A_33_P3323459 |              | Hs.452789 |                                                             | cDNA FLJ43791 fis. clone TEST2053328 [Source:UniProtKB/TrEMBL;Acc:Q6ZUD9] [ENST00000339674]                                               | 3.66845 | down | 1.90419 | down | 275.01416   | 1044.64860  | 50.60420    | 84.96944    | Detected    | Detected    | Detected    | Detected    |
| 5290 | A_23_P146946  | CST6         | Hs.139389 | cystatin E/M                                                | Homo sapiens cystatin E/M (CST6), mRNA [NM_001323]                                                                                        | 3.66835 | down | 3.60980 | down | 153.73158   | 583.93884   | 201.52415   | 641.46880   | Detected    | Detected    | Detected    | Detected    |
| 5291 | A_23_P68240   | GPAT2        | Hs.348629 | glycerol-3-phosphate acyltransferase 2, mitochondrial       | Homo sapiens glycerol-3-phosphate acyltransferase 2, mitochondrial (GPAT2), nuclear gene encoding mitochondrial protein, mRNA [NM_207328] | 3.66567 | down | 4.93455 | down | 756.55396   | 2871.61400  | 505.43155   | 2199.24500  | Detected    | Detected    | Detected    | Detected    |
| 5292 | A_32_P379467  | ISLR2        | Hs.254775 | immunoglobulin superfamily containing leucine-rich repeat 2 | Homo sapiens immunoglobulin superfamily containing leucine-rich repeat 2 (ISLR2), transcript variant 2, mRNA [NM_020851]                  | 3.66564 | down | 3.80175 | down | 24.91619    | 94.57231    | 11.97065    | 40.12975    | Detected    | Detected    | Compromised | Detected    |
| 5293 | A_33_P3252286 | CRLF1        | Hs.114948 | cytokine receptor-like factor 1                             | Homo sapiens cytokine receptor-like factor 1 (CRLF1), mRNA [NM_004750]                                                                    | 3.66271 | down | 3.82488 | down | 13849.45600 | 52525.27300 | 12980.70000 | 43780.62500 | Detected    | Detected    | Detected    | Detected    |
| 5294 | A_32_P212373  |              |           |                                                             |                                                                                                                                           | 3.66167 | down | 3.42420 | down | 193.54115   | 733.81415   | 156.42932   | 472.32764   | Detected    | Detected    | Detected    | Detected    |
| 5295 | A_33_P3386344 | FANCA        | Hs.719210 | Fanconi anemia, complementation group A                     | Homo sapiens Fanconi anemia, complementation group A (FANCA), transcript variant 2, mRNA [NM_001018112]                                   | 3.65940 | down | 2.54427 | down | 65.12068    | 246.75258   | 79.60854    | 178.60280   | Detected    | Detected    | Detected    | Detected    |
| 5296 | A_33_P3321432 | FAM198B      | Hs.567498 | family with sequence similarity 198, member B               | Homo sapiens family with sequence similarity 198, member B (FAM198B), transcript variant 2, mRNA [NM_016613]                              | 3.65178 | down | 4.38825 | down | 152.39822   | 576.25810   | 98.21914    | 380.06082   | Detected    | Detected    | Detected    | Detected    |
| 5297 | A_23_P145238  | HIST1H2BK    | Hs.437275 | histone cluster 1, H2bk                                     | Homo sapiens histone cluster 1, H2bk (HIST1H2BK), mRNA [NM_080593]                                                                        | 3.65126 | down | 3.95895 | down | 1148.69890  | 4342.92630  | 911.53260   | 3182.13090  | Detected    | Detected    | Detected    | Detected    |
| 5298 | A_33_P3217238 | ATAD2        | Hs.370834 | ATPase family, AAA domain containing 2                      | Homo sapiens ATPase family, AAA domain containing 2 (ATAD2), mRNA [NM_014109]                                                             | 3.65064 | down | 3.30123 | down | 1075.89710  | 4066.99100  | 892.74066   | 2598.76220  | Detected    | Detected    | Detected    | Detected    |
| 5299 | A_23_P121586  | HERC3        | Hs.35804  | hect domain and RLD 3                                       | Homo sapiens hect domain and RLD 3 (HERC3), mRNA [NM_014606]                                                                              | 3.64814 | down | 2.84675 | down | 46.90350    | 177.17812   | 16.13589    | 40.50490    | Detected    | Detected    | Detected    | Detected    |
| 5300 | A_33_P3271455 | PXDN         | Hs.332197 | peroxidase homolog (Drosophila)                             | Homo sapiens peroxidase homolog (Drosophila) (PXDN), mRNA [NM_012293]                                                                     | 3.64584 | down | 3.56628 | down | 16410.87100 | 61953.02700 | 9350.12000  | 29403.44500 | Detected    | Detected    | Detected    | Detected    |
| 5301 | A_23_P307544  | PLXNA2       | Hs.497626 | plexin A2                                                   | Homo sapiens plexin A2 (PLXNA2), mRNA [NM_025179]                                                                                         | 3.64236 | down | 5.06862 | down | 33.63466    | 126.85350   | 20.70332    | 92.53270    | Detected    | Detected    | Detected    | Detected    |
| 5302 | A_24_P60680   | OR10C1       | Hs.631997 | olfactory receptor, family 10, subfamily C, member 1        | Homo sapiens olfactory receptor, family 10, subfamily C, member 1 (OR10C1), mRNA [NM_013941]                                              | 3.63912 | down | 2.13922 | down | 57.45465    | 216.49855   | 42.17722    | 79.56069    | Detected    | Detected    | Detected    | Detected    |
| 5303 | A_32_P181103  | GGCX         | Hs.77719  | gamma-glutamyl carboxylase                                  | Homo sapiens gamma-glutamyl carboxylase (GGCX), transcript variant 1, mRNA [NM_000821]                                                    | 3.63746 | down | 3.75849 | down | 327.34338   | 1232.92070  | 281.51086   | 932.98390   | Detected    | Detected    | Detected    | Detected    |
| 5304 | A_32_P4199    | RNF152       | Hs.667457 | ring finger protein 152                                     | Homo sapiens ring finger protein 152 (RNF152), mRNA [NM_173557]                                                                           | 3.63175 | down | 4.50284 | down | 68.86626    | 258.97350   | 48.50383    | 192.58750   | Detected    | Detected    | Detected    | Detected    |
| 5305 | A_33_P3327200 | ATP2B4       | Hs.343522 | ATPase, Ca++ transporting, plasma membrane 4                | Homo sapiens ATPase, Ca++ transporting, plasma membrane 4 (ATP2B4), transcript variant 1, mRNA [NM_001001396]                             | 3.63161 | down | 3.50742 | down | 122.06923   | 459.02720   | 87.94022    | 271.98267   | Detected    | Detected    | Detected    | Detected    |
| 5306 | A_23_P7172    | PGM2         | Hs.23363  | phosphoglucomutase 2                                        | Homo sapiens phosphoglucomutase 2 (PGM2), mRNA [NM_018290]                                                                                | 3.62926 | down | 2.96191 | down | 76.140045   | 2861.30620  | 511.06235   | 1334.78340  | Detected    | Detected    | Detected    | Detected    |
| 5307 | A_23_P149545  | HIST2H2BE    | Hs.2178   | histone cluster 2, H2be                                     | Homo sapiens histone cluster 2, H2be (HIST2H2BE), mRNA [NM_003528]                                                                        | 3.62473 | down | 7.73174 | down | 14.49271    | 54.39488    | 2.77205     | 18.89919    | Detected    | Detected    | Compromised | Detected    |
| 5308 | A_33_P3392192 |              | Hs.688810 |                                                             | MSTP131 [Source:UniProtKB/TrEMBL;Acc:Q722R7] [ENST00000423322]                                                                            | 3.62171 | down | 3.49770 | down | 162.40160   | 609.02740   | 120.43778   | 371.45917   | Detected    | Detected    | Detected    | Detected    |
| 5309 | A_33_P3310276 | LOC652554    |           | similar to piwi-like 2                                      | PREDICTED: Homo sapiens similar to piwi like homolog 2 (LOC652554), mRNA [XM_942053]                                                      | 3.62089 | down | 2.34175 | down | 24.23840    | 90.87666    | 24.04621    | 49.65377    | Detected    | Detected    | Detected    | Detected    |
| 5310 | A_23_P8013    | HIST1H2BL    | Hs.137594 | histone cluster 1, H2bl                                     | Homo sapiens histone cluster 1, H2bl (HIST1H2BL), mRNA [NM_003519]                                                                        | 3.61351 | down | 3.95539 | down | 878.67523   | 3287.68770  | 1028.91190  | 3588.66550  | Detected    | Detected    | Detected    | Detected    |
| 5311 | A_23_P150053  | ACTA2        | Hs.500483 | actin, alpha 2, smooth muscle, aorta                        | Homo sapiens actin, alpha 2, smooth muscle, aorta (ACTA2), transcript variant 2, mRNA [NM_001613]                                         | 3.60917 | down | 3.76562 | down | 1443.42480  | 5394.28800  | 1353.69150  | 4494.91460  | Detected    | Detected    | Detected    | Detected    |
| 5312 | A_33_P3376031 |              | Hs.666223 |                                                             | Putative uncharacterized protein FLJ46214 [Source:UniProtKB/Swiss-Prot;Acc:Q6ZRN7] [ENST00000382225]                                      | 3.60599 | down | 2.37204 | down | 3.77485     | 14.09477    | 7.41909     | 15.51806    | Compromised | Compromised | Compromised | Detected    |
| 5313 | A_23_P151805  | FBLN5        | Hs.719986 | fibulin 5                                                   | Homo sapiens fibulin 5 (FBLN5), mRNA [NM_006329]                                                                                          | 3.60545 | down | 3.53951 | down | 13289.91100 | 49615.20000 | 11493.29200 | 35871.78000 | Detected    | Detected    | Detected    | Detected    |
| 5314 | A_33_P3349536 | CHEK1        | Hs.24529  | CHK1 checkpoint homolog (S. pombe)                          | Homo sapiens CHK1 checkpoint homolog (S. pombe) (CHEK1), transcript variant 2, mRNA [NM_001114121]                                        | 3.60125 | down | 3.30457 | down | 393.43924   | 1467.11610  | 390.91937   | 1139.11670  | Detected    | Detected    | Detected    | Detected    |
| 5315 | A_24_P251969  | FGF1         | Hs.483635 | fibroblast growth factor 1 (acidic)                         | Homo sapiens fibroblast growth factor 1 (acidic) (FGF1), transcript variant 1, mRNA [NM_000600]                                           | 3.59916 | down | 4.91719 | down | 9.94759     | 37.07256    | 7.56196     | 32.78812    | Compromised | Detected    | Compromised | Detected    |
| 5316 | A_33_P3233764 | LATS1        | Hs.716697 | LATS, large tumor suppressor, homolog 1 (Drosophila)        | Homo sapiens LATS, large tumor suppressor, homolog 1 (Drosophila) (LATS1), mRNA [NM_004690]                                               | 3.59906 | down | 4.07261 | down | 11.82651    | 44.07368    | 10.48285    | 37.64586    | Detected    | Detected    | Compromised | Detected    |
| 5317 | A_33_P3212432 | LOC100293406 | Hs.553971 | similar to hCG2002986                                       | PREDICTED: Homo sapiens similar to hCG2002986 (LOC100293406), mRNA [XM_002346043]                                                         | 3.59823 | down | 1.72822 | down | 4.94468     | 18.42301    | 5.80356     | 8.84422     | Compromised | Detected    | Compromised | Compromised |
| 5318 | A_24_P374675  | UNKL         | Hs.643536 | unkempt homolog (Drosophila)-like                           | Homo sapiens unkempt homolog (Drosophila)-like (UNKL), transcript variant 2, mRNA [NM_001037125]                                          | 3.59549 | down | 4.08399 | down | 12.43607    | 46.29933    | 12.72793    | 45.83612    | Compromised | Detected    | Compromised | Detected    |

|      |               |              |           |                                                                                              |                                                                                                                    |         |      |         |      |              |              |             |              |             |          |             |             |
|------|---------------|--------------|-----------|----------------------------------------------------------------------------------------------|--------------------------------------------------------------------------------------------------------------------|---------|------|---------|------|--------------|--------------|-------------|--------------|-------------|----------|-------------|-------------|
| 5319 | A_24_P31235   | EIF5A        | Hs.534314 | eukaryotic translation initiation factor 5A                                                  | Homo sapiens eukaryotic translation initiation factor 5A (EIF5A), transcript variant B, mRNA [NM_0019170]          | 3.59170 | down | 3.65952 | down | 2230.47100   | 8295.25800   | 1824.00060  | 5885.92400   | Detected    | Detected | Detected    | Detected    |
| 5320 | A_33_P3258362 | HBA2         | Hs.654744 | hemoglobin, alpha 2                                                                          | Homo sapiens hemoglobin, alpha 2 (HBA2), mRNA [NM_000517]                                                          | 3.59160 | down | 1.51256 | down | 28.27968     | 105.17101    | 11.54820    | 15.40257     | Detected    | Detected | Compromised | Compromised |
| 5321 | A_23_P409462  | DCBLD1       | Hs.658304 | discoidin, CUB and LCCL domain containing 1                                                  | Homo sapiens discoidin, CUB and LCCL domain containing 1 (DCBLD1), mRNA [NM_173674]                                | 3.58930 | down | 3.14684 | down | 72.92105     | 271.01675    | 50.13688    | 139.12242    | Detected    | Detected | Detected    | Detected    |
| 5322 | A_33_P3410409 | LAMP2        | Hs.496684 | lysosomal-associated membrane protein 2                                                      | Homo sapiens lysosomal-associated membrane protein 2 (LAMP2), transcript variant C, mRNA [NM_001122606]            | 3.58897 | down | 3.74267 | down | 1713.55630   | 6367.96900   | 1486.29540  | 4905.14600   | Detected    | Detected | Detected    | Detected    |
| 5323 | A_33_P3226832 | F3           | Hs.62192  | coagulation factor III (thromboplastin, tissue factor)                                       | Homo sapiens coagulation factor III (thromboplastin, tissue factor) (F3), mRNA [NM_001993]                         | 3.58681 | down | 3.52789 | down | 2749.87230   | 10213.02000  | 2131.62280  | 6631.18160   | Detected    | Detected | Detected    | Detected    |
| 5324 | A_32_P101860  |              |           |                                                                                              |                                                                                                                    | 3.58267 | down | 3.91925 | down | 347.75970    | 1290.08900   | 215.06146   | 743.24300    | Detected    | Detected | Detected    | Detected    |
| 5325 | A_33_P3363560 | TMEM51       | Hs.465305 | transmembrane protein 51                                                                     | Homo sapiens transmembrane protein 51 (TMEM51), transcript variant 1, mRNA [NM_001136216]                          | 3.58237 | down | 3.46112 | down | 428.72476    | 1590.30940   | 403.14370   | 1230.38610   | Detected    | Detected | Detected    | Detected    |
| 5326 | A_23_P257936  | TEX28        | Hs.672606 | testis expressed 28                                                                          | Homo sapiens testis expressed 28 (TEX28), mRNA [NM_001586]                                                         | 3.57870 | down | 1.10219 | down | 4.43554      | 16.43632     | 9.21441     | 8.95550      | Compromised | Detected | Compromised | Compromised |
| 5327 | A_23_P85922   | BMP8A        | Hs.472497 | bone morphogenetic protein 8a                                                                | Homo sapiens bone morphogenetic protein 8a (BMP8A), mRNA [NM_181809]                                               | 3.57717 | down | 3.69667 | down | 10.17271     | 37.67982     | 2.81777     | 9.18504      | Compromised | Detected | Compromised | Compromised |
| 5328 | A_23_P19754   | CPA4         | Hs.93764  | carboxypeptidase A4                                                                          | Homo sapiens carboxypeptidase A4 (CPA4), transcript variant 1, mRNA [NM_016352]                                    | 3.57499 | down | 3.47603 | down | 14.26910     | 52.82070     | 12.46064    | 38.19352     | Detected    | Detected | Compromised | Detected    |
| 5329 | A_24_P357726  | PSG8         | Hs.466843 | pregnancy specific beta-1-glycoprotein 8                                                     | Homo sapiens pregnancy specific beta-1-glycoprotein 8 (PSG8), transcript variant 1, mRNA [NM_182707]               | 3.57210 | down | 1.35410 | down | 95.66386     | 353.83860    | 97.68231    | 116.63563    | Detected    | Detected | Detected    | Detected    |
| 5330 | A_24_P810290  | PPAPDC1A     | Hs.40479  | phosphatidic acid phosphatase type 2 domain containing 1A                                    | Homo sapiens phosphatidic acid phosphatase type 2 domain containing 1A (PPAPDC1A), mRNA [NM_001030059]             | 3.56904 | down | 3.74212 | down | 395.08350    | 1460.07090   | 343.31372   | 1132.85550   | Detected    | Detected | Detected    | Detected    |
| 5331 | A_33_P3265872 | LOC100128994 | Hs.453788 | hypothetical LOC100128994                                                                    | PREDICTED: Homo sapiens hypothetical LOC100128994 (LOC100128994), mRNA [XM_00171144]                               | 3.56623 | down | 3.66058 | down | 139.54039    | 515.27820    | 164.21724   | 530.07150    | Detected    | Detected | Detected    | Detected    |
| 5332 | A_23_P435610  | KIAA0090     | Hs.439200 | KIAA0090                                                                                     | Homo sapiens KIAA0090 (KIAA0090), mRNA [NM_015047]                                                                 | 3.56536 | down | 3.81056 | down | 354.83360    | 1309.96910   | 293.99094   | 987.84450    | Detected    | Detected | Detected    | Detected    |
| 5333 | A_23_P70843   | BPGM         | Hs.198365 | 2,3-bisphosphoglycerate mutase                                                               | Homo sapiens 2,3-bisphosphoglycerate mutase (BPGM), transcript variant 2, mRNA [NM_199186]                         | 3.56381 | down | 3.25983 | down | 2182.77200   | 8054.82960   | 1954.05160  | 5616.89000   | Detected    | Detected | Detected    | Detected    |
| 5334 | A_24_P183150  | CXCL3        | Hs.89690  | chemokine (C-X-C motif) ligand 3                                                             | Homo sapiens chemokine (C-X-C motif) ligand 3 (CXCL3), mRNA [NM_002090]                                            | 3.55833 | down | 3.66299 | down | 186.66193    | 687.75720    | 146.50864   | 473.22174    | Detected    | Detected | Detected    | Detected    |
| 5335 | A_33_P3280945 | SNHG3        |           | small nucleolar RNA host gene 3 (non-protein coding)                                         | Homo sapiens small nucleolar RNA host gene 3 (non-protein coding) (SNHG3), non-coding RNA [NR_002909]              | 3.55523 | down | 3.73955 | down | 5548.47200   | 20425.54100  | 3471.29470  | 11446.60200  | Detected    | Detected | Detected    | Detected    |
| 5336 | A_33_P3281850 |              |           | Cell growth regulator with EF hand domain protein 1 (Cell growth regulatory gene 11 protein) | [Source:UniProtKB/Swiss-Prot;Acc:Q99674] [ENST00000402550]                                                         | 3.55495 | down | 1.98076 | down | 42.03998     | 154.74959    | 32.63218    | 56.99597     | Detected    | Detected | Detected    | Detected    |
| 5337 | A_23_P128147  | TUBA1B       | Hs.524390 | tubulin, alpha 1b                                                                            | Homo sapiens tubulin, alpha 1b (TUBA1B), mRNA [NM_006082]                                                          | 3.55446 | down | 3.78583 | down | 107757.17000 | 396600.30000 | 70294.20000 | 234663.94000 | Detected    | Detected | Detected    | Detected    |
| 5338 | A_23_P26511   | GDPD3        | Hs.289015 | glycerophosphodiester phosphodiesterase domain containing 3                                  | Homo sapiens glycerophosphodiester phosphodiesterase domain containing 3 (GDPD3), mRNA [NM_024307]                 | 3.55303 | down | 4.05328 | down | 41.87480     | 154.05829    | 46.70894    | 166.94452    | Detected    | Detected | Detected    | Detected    |
| 5339 | A_23_P134601  | WNT16        | Hs.272375 | wingless-type MMTV integration site family, member 16                                        | Homo sapiens wingless-type MMTV integration site family, member 16 (WNT16), transcript variant 1, mRNA [NM_057168] | 3.54859 | down | 3.23654 | down | 36.36884     | 133.63458    | 23.00234    | 65.64746     | Detected    | Detected | Detected    | Detected    |
| 5340 | A_23_P76731   | RAGE         | Hs.104119 | renal tumor antigen                                                                          | Homo sapiens renal tumor antigen (RAGE), mRNA [NM_014226]                                                          | 3.54590 | down | 3.54097 | down | 1172.01210   | 4303.19600   | 1120.85770  | 3499.76340   | Detected    | Detected | Detected    | Detected    |
| 5341 | A_23_P33326   | ADRA1B       | Hs.368632 | adrenergic, alpha-1B-, receptor                                                              | Homo sapiens adrenergic, alpha-1B-, receptor (ADRA1B), mRNA [NM_000679]                                            | 3.54319 | down | 3.97062 | down | 374.43750    | 1373.74700   | 347.30530   | 1216.00570   | Detected    | Detected | Detected    | Detected    |
| 5342 | A_23_P76705   | TUBGCP3      | Hs.224152 | tubulin, gamma complex associated protein 3                                                  | Homo sapiens tubulin, gamma complex associated protein 3 (TUBGCP3), mRNA [NM_006322]                               | 3.54304 | down | 3.63900 | down | 231.96722    | 851.01166    | 190.08424   | 609.94920    | Detected    | Detected | Detected    | Detected    |
| 5343 | A_33_P3264895 | RHEBL1       | Hs.159013 | Ras homolog enriched in brain like 1                                                         | Homo sapiens Ras homolog enriched in brain like 1 (RHEBL1), mRNA [NM_144593]                                       | 3.54234 | down | 3.68896 | down | 1252.12350   | 4592.73050   | 970.29224   | 3156.25220   | Detected    | Detected | Detected    | Detected    |
| 5344 | A_23_P353717  | C16orf75     | Hs.347524 | chromosome 16 open reading frame 75                                                          | Homo sapiens chromosome 16 open reading frame 75 (C16orf75), mRNA [NM_152308]                                      | 3.54040 | down | 4.26556 | down | 760.03820    | 2786.25170   | 643.79250   | 2421.51540   | Detected    | Detected | Detected    | Detected    |
| 5345 | A_33_P3280796 |              |           | LIM domain only protein 7 (LOMP)(F-box only protein 20)                                      | [Source:UniProtKB/Swiss-Prot;Acc:Q6HW1] [ENST00000377499]                                                          | 3.54028 | down | 3.79997 | down | 28.58457     | 104.78590    | 20.30353    | 68.03269     | Detected    | Detected | Detected    | Detected    |
| 5346 | A_23_P120883  | HMOX1        | Hs.517581 | heme oxygenase (decycling) 1                                                                 | Homo sapiens heme oxygenase (decycling) 1 (HMOX1), mRNA [NM_002133]                                                | 3.53897 | down | 3.70083 | down | 45352.93400  | 166194.17000 | 33572.63000 | 109559.42000 | Detected    | Detected | Detected    | Detected    |
| 5347 | A_23_P155989  | CENPK        | Hs.529778 | centromere protein K                                                                         | Homo sapiens centromere protein K (CENPK), mRNA [NM_022145]                                                        | 3.53495 | down | 2.89504 | down | 282.01190    | 1032.24870   | 118.56199   | 302.66720    | Detected    | Detected | Detected    | Detected    |
| 5348 | A_23_P134517  | PURB         | Hs.349150 | purine-rich element binding protein B                                                        | Homo sapiens purine-rich element binding protein B (PURB), mRNA [NM_033224]                                        | 3.53174 | down | 3.61456 | down | 895.06525    | 3273.23240   | 691.15530   | 2202.91040   | Detected    | Detected | Detected    | Detected    |

|      |               |              |           |                                                                    |                                                                                                                                                                                    |         |      |         |      |            |             |            |             |             |          |             |             |
|------|---------------|--------------|-----------|--------------------------------------------------------------------|------------------------------------------------------------------------------------------------------------------------------------------------------------------------------------|---------|------|---------|------|------------|-------------|------------|-------------|-------------|----------|-------------|-------------|
| 5349 | A_33_P3423565 | LOC100291714 |           | hypothetical protein LOC100291714                                  | PREDICTED: Homo sapiens hypothetical protein LOC100291714 (LOC100291714), mRNA [XM_002344976]                                                                                      | 3.53127 | down | 2.28696 | down | 12.10876   | 44.27559    | 20.60895   | 41.56035    | Detected    | Detected | Detected    | Detected    |
| 5350 | A_23_P76435   | GATC         | Hs.369624 | glutamyl-tRNA(Gln) amidotransferase, subunit C homolog (bacterial) | Homo sapiens glutamyl-tRNA(Gln) amidotransferase, subunit C homolog (bacterial) (GATC), mRNA [NM_176818]                                                                           | 3.53085 | down | 4.13800 | down | 52.15594   | 190.68456   | 48.54683   | 177.14010   | Detected    | Detected | Detected    | Detected    |
| 5351 | A_32_P160045  | TCTEX1D1     | Hs.479226 | Tctex1 domain containing 1                                         | Homo sapiens Tctex1 domain containing 1 (TCTEX1D1), mRNA [NM_152665]                                                                                                               | 3.52589 | down | 4.19416 | down | 9.89301    | 36.11855    | 5.05560    | 18.69746    | Compromised | Detected | Compromised | Detected    |
| 5352 | A_32_P416161  | XKRX         | Hs.364911 | XK, Kell blood group complex subunit-related, X-linked             | Homo sapiens XK, Kell blood group complex subunit-related, X-linked (XKRX), mRNA [NM_212559]                                                                                       | 3.52292 | down | 3.66999 | down | 8.71600    | 31.79463    | 9.74857    | 31.54801    | Compromised | Detected | Compromised | Detected    |
| 5353 | A_23_P165201  | PRODH2       | Hs.515366 | proline dehydrogenase (oxidase) 2                                  | Homo sapiens proline dehydrogenase (oxidase) 2 (PRODH2), mRNA [NM_021232]                                                                                                          | 3.51936 | down | 1.72921 | down | 8.20413    | 29.89708    | 2.87968    | 4.39094     | Compromised | Detected | Compromised | Compromised |
| 5354 | A_23_P29067   | TMPRSS2      | Hs.439309 | transmembrane protease, serine 2                                   | Homo sapiens transmembrane protease, serine 2 (TMPRSS2), transcript variant 2, mRNA [NM_005656]                                                                                    | 3.51354 | down | 2.75185 | down | 58.68810   | 213.51477   | 10.03630   | 24.35359    | Detected    | Detected | Compromised | Detected    |
| 5355 | A_23_P98350   | BIRC3        | Hs.127799 | baculoviral IAP repeat-containing 3                                | Homo sapiens baculoviral IAP repeat-containing 3 (BIRC3), transcript variant 1, mRNA [NM_001165]                                                                                   | 3.51217 | down | 3.31087 | down | 161.07797  | 585.79346   | 102.84661  | 300.26013   | Detected    | Detected | Detected    | Detected    |
| 5356 | A_33_P3325843 | LOC100131686 | Hs.689484 | hypothetical protein LOC100131686                                  | PREDICTED: Homo sapiens hypothetical protein LOC100131686, transcript variant 2 (LOC100131686), mRNA [XM_001722260]                                                                | 3.51185 | down | 3.55226 | down | 261.11588  | 949.51720   | 133.40028  | 417.85583   | Detected    | Detected | Detected    | Detected    |
| 5357 | A_23_P111054  | HIST1H2BB    | Hs.553494 | histone cluster 1, H2bb                                            | Homo sapiens histone cluster 1, H2bb (HIST1H2BB), mRNA [NM_021062]                                                                                                                 | 3.50981 | down | 3.49021 | down | 179.87553  | 653.71590   | 214.14377  | 659.05585   | Detected    | Detected | Detected    | Detected    |
| 5358 | A_33_P3344277 |              |           |                                                                    | HCLS1-binding protein 3 (HS1-binding protein 3)(HSP1BP-3) [Source:UniProtKB/Swiss-Prot;Acc:Q53T59] [ENST00000402541]                                                               | 3.50967 | down | 4.06850 | down | 60.86503   | 221.19077   | 41.65284   | 149.43239   | Detected    | Detected | Detected    | Detected    |
| 5359 | A_33_P3259775 | DOCK5        | Hs.195403 | dedicator of cytokinesis 5                                         | Homo sapiens dedicator of cytokinesis 5 (DOCK5), mRNA [NM_024940]                                                                                                                  | 3.50323 | down | 3.24588 | down | 61.65580   | 223.85318   | 41.67636   | 119.28570   | Detected    | Detected | Detected    | Detected    |
| 5360 | A_23_P30254   | PLK2         | Hs.398157 | polo-like kinase 2 (Drosophila)                                    | Homo sapiens polo-like kinase 2 (Drosophila) (PLK2), mRNA [NM_006622]                                                                                                              | 3.49686 | down | 3.58726 | down | 957.32150  | 3466.32810  | 654.82007  | 2071.33740  | Detected    | Detected | Detected    | Detected    |
| 5361 | A_23_P3562    | SLC7A6OS     | Hs.709557 | solute carrier family 7, member 6 opposite strand                  | Homo sapiens solute carrier family 7, member 6 opposite strand (SLC7A6OS), mRNA [NM_032178]                                                                                        | 3.49680 | down | 3.04880 | down | 540.68190  | 1957.69630  | 502.00986  | 1349.60380  | Detected    | Detected | Detected    | Detected    |
| 5362 | A_33_P3372212 |              | Hs.655399 |                                                                    | Pregnancy-specific beta-1-glycoprotein 5 Precursor (PSBG-5)(Fetal liver non-specific cross-reactive antigen 3)(FL-NCA-3) [Source:UniProtKB/Swiss-Prot;Acc:Q15238] [ENST0000040580] | 3.49676 | down | 3.94369 | down | 357.09415  | 1292.94900  | 270.83282  | 941.82324   | Detected    | Detected | Detected    | Detected    |
| 5363 | A_23_P63432   | RHBDL2       | Hs.524626 | rhomboid, veinlet-like 2 (Drosophila)                              | Homo sapiens rhomboid, veinlet-like 2 (Drosophila) (RHBDL2), mRNA [NM_017821]                                                                                                      | 3.49088 | down | 2.98158 | down | 55.38981   | 200.21553   | 51.93965   | 136.55618   | Detected    | Detected | Detected    | Detected    |
| 5364 | A_24_P181585  | LRRCS9       | Hs.370927 | leucine rich repeat containing 59                                  | Homo sapiens leucine rich repeat containing 59 (LRRCS9), mRNA [NM_018509]                                                                                                          | 3.48785 | down | 3.24206 | down | 9999.81900 | 36114.66000 | 6029.58600 | 17237.49200 | Detected    | Detected | Detected    | Detected    |
| 5365 | A_23_P122815  | CALU         | Hs.718425 | calumenin                                                          | Homo sapiens calumenin (CALU), transcript variant 1, mRNA [NM_001219]                                                                                                              | 3.48704 | down | 3.25888 | down | 3573.08300 | 12901.30700 | 2560.03200 | 7356.63130  | Detected    | Detected | Detected    | Detected    |
| 5366 | A_33_P3379454 | UHRF1        | Hs.108106 | ubiquitin-like with PHD and ring finger domains 1                  | Homo sapiens ubiquitin-like with PHD and ring finger domains 1 (UHRF1), transcript variant 2, mRNA [NM_013282]                                                                     | 3.47909 | down | 4.58753 | down | 37.88173   | 136.46721   | 33.17343   | 134.19444   | Detected    | Detected | Detected    | Detected    |
| 5367 | A_23_P318039  | RQCD1        | Hs.148767 | RCD1 required for cell differentiation1 homolog (S. pombe)         | Homo sapiens RCD1 required for cell differentiation1 homolog (S. pombe) (RQCD1), mRNA [NM_005444]                                                                                  | 3.47865 | down | 3.20806 | down | 117.86211  | 424.53992   | 84.84498   | 240.01234   | Detected    | Detected | Detected    | Detected    |
| 5368 | A_23_P144348  | SLIT2        | Hs.29802  | slit homolog 2 (Drosophila)                                        | Homo sapiens slit homolog 2 (Drosophila) (SLIT2), mRNA [NM_004787]                                                                                                                 | 3.47757 | down | 3.57776 | down | 577.75750  | 2080.43400  | 629.35220  | 1985.50440  | Detected    | Detected | Detected    | Detected    |
| 5369 | A_33_P3308686 | CC2D2A       | Hs.590928 | coiled-coil and C2 domain containing 2A                            | Homo sapiens coiled-coil and C2 domain containing 2A (CC2D2A), transcript variant 2, mRNA [NM_020785]                                                                              | 3.47552 | down | 2.94428 | down | 151.60490  | 545.58950   | 102.56459  | 266.28204   | Detected    | Detected | Detected    | Detected    |
| 5370 | A_33_P3259845 | FAM53A       | Hs.143314 | family with sequence similarity 53, member A                       | Homo sapiens family with sequence similarity 53, member A (FAM53A), mRNA [NM_001013622]                                                                                            | 3.47542 | down | 2.71118 | down | 26.95874   | 97.01531    | 21.68171   | 51.83439    | Detected    | Detected | Detected    | Detected    |
| 5371 | A_33_P3376971 | CHAC1        | Hs.155569 | ChaC, cation transport regulator homolog 1 (E. coli)               | Homo sapiens ChaC, cation transport regulator homolog 1 (E. coli) (CHAC1), transcript variant 1, mRNA [NM_024111]                                                                  | 3.47158 | down | 4.38778 | down | 500.00160  | 1797.34330  | 502.52450  | 1944.32100  | Detected    | Detected | Detected    | Detected    |
| 5372 | A_23_P419714  | BTBD11       | Hs.271272 | BTB (POZ) domain containing 11                                     | Homo sapiens BTB (POZ) domain containing 11 (BTBD11), transcript variant a, mRNA [NM_001018072]                                                                                    | 3.46843 | down | 2.27990 | down | 13.52772   | 48.58366    | 16.14257   | 32.45290    | Detected    | Detected | Detected    | Detected    |
| 5373 | A_23_P1331    | COL13A1      | Hs.695934 | collagen, type XIII, alpha 1                                       | Homo sapiens collagen, type XIII, alpha 1 (COL13A1), transcript variant 1, mRNA [NM_005203]                                                                                        | 3.46734 | down | 3.65189 | down | 1187.77160 | 4264.45170  | 736.68463  | 2372.27610  | Detected    | Detected | Detected    | Detected    |
| 5374 | A_33_P3316064 |              | Hs.691047 |                                                                    | DA567289 HEART2 Homo sapiens cDNA clone HEART2010630 5', mRNA sequence [DA567289]                                                                                                  | 3.46614 | down | 3.64841 | down | 21.99452   | 78.93935    | 22.14466   | 71.24229    | Detected    | Detected | Detected    | Detected    |
| 5375 | A_23_P52207   | BAMBI        | Hs.533336 | BMP and activin membrane-bound inhibitor homolog (Xenopus laevis)  | Homo sapiens BMP and activin membrane-bound inhibitor homolog (Xenopus laevis) (BAMBI), mRNA [NM_012342]                                                                           | 3.46492 | down | 3.69411 | down | 594.85390  | 2134.20580  | 509.33557  | 1659.12520  | Detected    | Detected | Detected    | Detected    |
| 5376 | A_24_P151121  |              |           |                                                                    |                                                                                                                                                                                    | 3.46245 | down | 3.97912 | down | 15.67692   | 56.20525    | 8.77837    | 30.80112    | Detected    | Detected | Compromised | Detected    |

|      |               |           |           |                                                                                                                                                                                                                                                                                          |                                                                                                                 |         |         |          |           |             |             |             |             |             |             |             |             |
|------|---------------|-----------|-----------|------------------------------------------------------------------------------------------------------------------------------------------------------------------------------------------------------------------------------------------------------------------------------------------|-----------------------------------------------------------------------------------------------------------------|---------|---------|----------|-----------|-------------|-------------|-------------|-------------|-------------|-------------|-------------|-------------|
| 5377 | A_33_P3283196 |           |           | SFRS2-interacting protein (Splicing factor, arginine/serine-rich 2-interacting protein)(SC35-interacting protein 1)(CTD-associated SR protein 11)(Splicing regulatory protein 129)(SRp129)(Renal carcinoma antigen NY-REN-40) [Source:UniProtKB/Swiss-Prot;Acc:Q99590] [ENST00000395453] | 3.45788                                                                                                         | down    | 3.15378 | down     | 312.24120 | 1117.97910  | 260.88037   | 725.50220   | Detected    | Detected    | Detected    | Detected    |             |
| 5378 | A_33_P3277097 |           |           | lymphocyte antigen 6 complex, locus GBE (LY6GBE), transcript variant 2, non-coding RNA [Source:RefSeq;DNA:Acc:NR_003673] [ENST0000383417]                                                                                                                                                | 3.44865                                                                                                         | down    | 3.47182 | down     | 132.29988 | 472.43472   | 151.45505   | 463.66724   | Detected    | Detected    | Detected    | Detected    |             |
| 5379 | A_24_P133584  | MFGE8     | Hs.3745   | milk fat globule-EGF factor 8 protein                                                                                                                                                                                                                                                    | Homo sapiens milk fat globule-EGF factor 8 protein (MFGE8), transcript variant 1, mRNA [NM_005928]              | 3.44577 | down    | 4.26756  | down      | 689.48517   | 2460.04860  | 638.23950   | 2401.75730  | Detected    | Detected    | Detected    | Detected    |
| 5380 | A_33_P3352019 | SCARA3    | Hs.128856 | scavenger receptor class A, member 3                                                                                                                                                                                                                                                     | Homo sapiens scavenger receptor class A, member 3 (SCARA3), transcript variant 2, mRNA [NM_182826]              | 3.44359 | down    | 3.60844  | down      | 168.41946   | 600.53260   | 182.38518   | 580.32930   | Detected    | Detected    | Detected    | Detected    |
| 5381 | A_33_P3313065 | OR5C1     | Hs.534761 | olfactory receptor, family 5, subfamily C, member 1                                                                                                                                                                                                                                      | Homo sapiens olfactory receptor, family 5, subfamily C, member 1 (OR5C1), mRNA [NM_001001923]                   | 3.44149 | down    | 2.24851  | down      | 71.75095    | 255.68637   | 21.24385    | 42.12041    | Detected    | Detected    | Detected    | Detected    |
| 5382 | A_33_P3263232 | LRRC3     | Hs.326579 | leucine rich repeat containing 3                                                                                                                                                                                                                                                         | Homo sapiens leucine rich repeat containing 3 (LRRC3), mRNA [NM_030891]                                         | 3.43806 | down    | 3.56031  | down      | 179.86240   | 640.30590   | 134.90565   | 423.52970   | Detected    | Detected    | Detected    | Detected    |
| 5383 | A_23_P155765  | HMG2      | Hs.434953 | high-mobility group box 2                                                                                                                                                                                                                                                                | Homo sapiens high-mobility group box 2 (HMG2), transcript variant 1, mRNA [NM_002129]                           | 3.43732 | down    | 3.28055  | down      | 5733.48300  | 20406.62000 | 4430.14500  | 12815.32300 | Detected    | Detected    | Detected    | Detected    |
| 5384 | A_23_P59602   | MIOS      | Hs.520215 | missing oocyte, meiosis regulator, homolog (Drosophila)                                                                                                                                                                                                                                  | Homo sapiens missing oocyte, meiosis regulator, homolog (Drosophila) (MIOS), mRNA [NM_019005]                   | 3.43392 | down    | 3.46502  | down      | 1743.50350  | 6199.34230  | 1785.36450  | 5455.04700  | Detected    | Detected    | Detected    | Detected    |
| 5385 | A_33_P3312258 | TUBB      | Hs.636480 | tubulin, beta                                                                                                                                                                                                                                                                            | Homo sapiens tubulin, beta (TUBB), mRNA [NM_178014]                                                             | 3.43133 | down    | 3.61192  | down      | 6120.86300  | 21747.45300 | 5897.70560  | 18783.91600 | Detected    | Detected    | Detected    | Detected    |
| 5386 | A_24_P282237  | PRIM2     | Hs.654580 | primase, DNA, polypeptide 2 (58kDa)                                                                                                                                                                                                                                                      | Homo sapiens primase, DNA, polypeptide 2 (58kDa) (PRIM2), mRNA [NM_000947]                                      | 3.42646 | down    | 3.38303  | down      | 109.93461   | 390.04382   | 64.25757    | 191.68808   | Detected    | Detected    | Detected    | Detected    |
| 5387 | A_33_P3214159 | CDH2      | Hs.464829 | cadherin 2, type 1, N-cadherin (neuronal)                                                                                                                                                                                                                                                | Homo sapiens cadherin 2, type 1, N-cadherin (neuronal) (CDH2), mRNA [NM_001792]                                 | 3.42621 | down    | 3.64970  | down      | 1946.82370  | 6906.75700  | 1861.10560  | 5989.53470  | Detected    | Detected    | Detected    | Detected    |
| 5388 | A_23_P318604  |           |           |                                                                                                                                                                                                                                                                                          |                                                                                                                 | 3.42296 | down    | 3.47489  | down      | 91.08279    | 322.82830   | 77.14034    | 236.36763   | Detected    | Detected    | Detected    | Detected    |
| 5389 | A_24_P22981   | ZNF253    | Hs.659321 | zinc finger protein 253                                                                                                                                                                                                                                                                  | Homo sapiens zinc finger protein 253 (ZNF253), mRNA [NM_021047]                                                 | 3.42165 | down    | 16.50574 | down      | 2.38425     | 8.37651     | 4.00371     | 58.27250    | Compromised | Compromised | Compromised | Detected    |
| 5390 | A_23_P51376   | NKAIN1    | Hs.470259 | Na <sup>+</sup> /K <sup>+</sup> transporting ATPase interacting 1                                                                                                                                                                                                                        | Homo sapiens Na <sup>+</sup> /K <sup>+</sup> transporting ATPase interacting 1 (NKAIN1), mRNA [NM_024522]       | 3.42062 | down    | 5.05201  | down      | 59.20457    | 209.69750   | 41.25796    | 183.79675   | Detected    | Detected    | Detected    | Detected    |
| 5391 | A_23_P201636  | LAMC2     | Hs.591484 | laminin, gamma 2                                                                                                                                                                                                                                                                         | Homo sapiens laminin, gamma 2 (LAMC2), transcript variant 1, mRNA [NM_005562]                                   | 3.42014 | down    | 3.59135  | down      | 800.69934   | 2835.61180  | 720.53546   | 2281.80700  | Detected    | Detected    | Detected    | Detected    |
| 5392 | A_33_P3335935 | HN1L      | Hs.513261 | hematological and neurological expressed 1-like                                                                                                                                                                                                                                          | Homo sapiens hematological and neurological expressed 1-like (HN1L), mRNA [NM_144570]                           | 3.41902 | down    | 3.31863  | down      | 116.86543   | 413.73386   | 105.48631   | 308.68814   | Detected    | Detected    | Detected    | Detected    |
| 5393 | A_23_P502747  | RASAL2    | Hs.549729 | RAS protein activator like 2                                                                                                                                                                                                                                                             | Homo sapiens RAS protein activator like 2 (RASAL2), transcript variant 2, mRNA [NM_170692]                      | 3.41673 | down    | 4.27400  | down      | 75.98702    | 268.83330   | 51.87065    | 195.48889   | Detected    | Detected    | Detected    | Detected    |
| 5394 | A_24_P402825  | CACNA2D3  | Hs.656687 | calcium channel, voltage-dependent, alpha 2/delta subunit 3                                                                                                                                                                                                                              | Homo sapiens calcium channel, voltage-dependent, alpha 2/delta subunit 3 (CACNA2D3), mRNA [NM_018398]           | 3.41612 | down    | 8.16352  | down      | 11.49971    | 40.67743    | 5.55219     | 39.96753    | Compromised | Detected    | Compromised | Detected    |
| 5395 | A_33_P3253832 |           |           |                                                                                                                                                                                                                                                                                          |                                                                                                                 | 3.41605 | down    | 3.61544  | down      | 5836.16550  | 20643.56400 | 4327.42530  | 13796.10300 | Detected    | Detected    | Detected    | Detected    |
| 5396 | A_33_P3402010 |           | Hs.551210 |                                                                                                                                                                                                                                                                                          | Uncharacterized protein C14orf56 [Source:UniProtKB/Swiss-Prot;Acc:Q9H7N3] [ENST00000427346]                     | 3.41427 | down    | 1.77722  | down      | 171.10538   | 604.91600   | 24.25271    | 38.00719    | Detected    | Detected    | Detected    | Detected    |
| 5397 | A_32_P213459  | DMRT2     | Hs.59506  | doublesex and mab-3 related transcription factor 2                                                                                                                                                                                                                                       | Homo sapiens doublesex and mab-3 related transcription factor 2 (DMRT2), transcript variant 1, mRNA [NM_006557] | 3.41415 | down    | 4.34384  | down      | 34.63318    | 122.43580   | 24.75905    | 94.83593    | Detected    | Detected    | Detected    | Detected    |
| 5398 | A_23_P426989  | SH3BP5L   | Hs.298573 | SH3-binding domain protein 5-like                                                                                                                                                                                                                                                        | Homo sapiens SH3-binding domain protein 5-like (SH3BP5L), mRNA [NM_030645]                                      | 3.41312 | down    | 3.51348  | down      | 3033.49600  | 10720.82500 | 3320.43140  | 10287.20700 | Detected    | Detected    | Detected    | Detected    |
| 5399 | A_23_P80295   | SYN3      | Hs.608750 | synapsin III                                                                                                                                                                                                                                                                             | Homo sapiens synapsin III (SYN3), transcript variant IIIa, mRNA [NM_003490]                                     | 3.41138 | down    | 3.10701  | down      | 8.06113     | 28.47466    | 5.86243     | 16.06150    | Compromised | Detected    | Compromised | Detected    |
| 5400 | A_33_P3365988 | LOC728463 | Hs.680183 | hypothetical protein LOC728463                                                                                                                                                                                                                                                           | PREDICTED: Homo sapiens hypothetical protein LOC728463 (LOC728463), miscRNA [XR_041658]                         | 3.41018 | down    | 4.29386  | down      | 6.40792     | 22.62699    | 3.35601     | 12.70683    | Compromised | Detected    | Compromised | Compromised |
| 5401 | A_33_P3341424 | MYO10     | Hs.481720 | myosin X                                                                                                                                                                                                                                                                                 | Homo sapiens myosin X (MYO10), mRNA [NM_012334]                                                                 | 3.40986 | down    | 3.09972  | down      | 812.23444   | 2867.81620  | 695.86430   | 1902.00800  | Detected    | Detected    | Detected    | Detected    |
| 5402 | A_23_P19624   | BMP6      | Hs.285671 | bone morphogenetic protein 6                                                                                                                                                                                                                                                             | Homo sapiens bone morphogenetic protein 6 (BMP6), mRNA [NM_001718]                                              | 3.40700 | down    | 3.36984  | down      | 1000.64856  | 3530.09420  | 923.59540   | 2744.45730  | Detected    | Detected    | Detected    | Detected    |
| 5403 | A_23_P81912   | TUBB      | Hs.636480 | tubulin, beta                                                                                                                                                                                                                                                                            | Homo sapiens tubulin, beta (TUBB), mRNA [NM_178014]                                                             | 3.40157 | down    | 3.67448  | down      | 13773.70500 | 48513.58200 | 16979.76600 | 55016.57000 | Detected    | Detected    | Detected    | Detected    |
| 5404 | A_23_P15348   | MPRIIP    | Hs.462341 | myosin phosphatase Rho interacting protein                                                                                                                                                                                                                                               | Homo sapiens myosin phosphatase Rho interacting protein (MPRIIP), transcript variant 1, mRNA [NM_015134]        | 3.39958 | down    | 3.72961  | down      | 6380.43300  | 22459.92800 | 5414.05370  | 17805.38000 | Detected    | Detected    | Detected    | Detected    |
| 5405 | A_23_P387057  | TUBB      | Hs.636480 | tubulin, beta                                                                                                                                                                                                                                                                            | Homo sapiens tubulin, beta (TUBB), mRNA [NM_178014]                                                             | 3.39656 | down    | 3.34688  | down      | 4480.39940  | 15757.58700 | 3812.83500  | 11252.63600 | Detected    | Detected    | Detected    | Detected    |
| 5406 | A_33_P3214849 | KDEL2     | Hs.83286  | KDEL (Lys-Asp-Glu-Leu) containing 2                                                                                                                                                                                                                                                      | Homo sapiens KDEL (Lys-Asp-Glu-Leu) containing 2 (KDEL2), mRNA [NM_153705]                                      | 3.39393 | down    | 3.47129  | down      | 1088.31910  | 3824.65140  | 649.86320   | 1989.19730  | Detected    | Detected    | Detected    | Detected    |

|      |               |           |           |                                                                  |                                                                                                                                |         |      |         |      |            |             |            |             |             |          |             |             |
|------|---------------|-----------|-----------|------------------------------------------------------------------|--------------------------------------------------------------------------------------------------------------------------------|---------|------|---------|------|------------|-------------|------------|-------------|-------------|----------|-------------|-------------|
| 5407 | A_32.P117464  | C3orf59   | Hs.151443 | chromosome 3 open reading frame 59                               | Homo sapiens chromosome 3 open reading frame 59 (C3orf59), mRNA [NM_178496]                                                    | 3.39218 | down | 3.38766 | down | 221.22879  | 777.05940   | 148.34941  | 443.14984   | Detected    | Detected | Detected    | Detected    |
| 5408 | A_24.P943997  | ARL5B     | Hs.25362  | ADP-ribosylation factor-like 5B                                  | Homo sapiens ADP-ribosylation factor-like 5B (ARL5B), mRNA [NM_178815]                                                         | 3.38469 | down | 2.07373 | down | 20.73344   | 72.66457    | 23.64074   | 43.22933    | Detected    | Detected | Detected    | Detected    |
| 5409 | A_24.P184769  | WDR20     | Hs.36859  | WD repeat domain 20                                              | Homo sapiens WD repeat domain 20 (WDR20), transcript variant 1, mRNA [NM_181291]                                               | 3.38324 | down | 3.89757 | down | 235.56650  | 825.23956   | 166.60680  | 572.60030   | Detected    | Detected | Detected    | Detected    |
| 5410 | A_23.P358917  | CYP3A7    | Hs.111944 | cytochrome P450, family 3, subfamily A, polypeptide 7            | Homo sapiens cytochrome P450, family 3, subfamily A, polypeptide 7 (CYP3A7), mRNA [NM_000765]                                  | 3.38305 | down | 2.39064 | down | 15.91747   | 55.75911    | 14.74097   | 31.07464    | Detected    | Detected | Detected    | Detected    |
| 5411 | A_33.P3274397 | CHM       | Hs.496449 | choroideremia (Rab escort protein 1)                             | Homo sapiens choroideremia (Rab escort protein 1) (CHM), transcript variant 2, mRNA [NM_001145414]                             | 3.37952 | down | 3.26359 | down | 124.25421  | 434.80970   | 88.05138   | 253.39459   | Detected    | Detected | Detected    | Detected    |
| 5412 | A_24.P225468  | ANP32E    | Hs.656466 | acidic (leucine-rich) nuclear phosphoprotein 32 family, member E | Homo sapiens acidic (leucine-rich) nuclear phosphoprotein 32 family, member E (ANP32E), transcript variant 1, mRNA [NM_003920] | 3.37944 | down | 3.28218 | down | 866.83640  | 3032.59400  | 541.87620  | 1568.29440  | Detected    | Detected | Detected    | Detected    |
| 5413 | A_23.P26557   | C16orf59  | Hs.534491 | chromosome 16 open reading frame 59                              | Homo sapiens chromosome 16 open reading frame 59 (C16orf59), mRNA [NM_025108]                                                  | 3.37857 | down | 3.60126 | down | 397.71536  | 1391.35700  | 445.41122  | 1414.42750  | Detected    | Detected | Detected    | Detected    |
| 5414 | A_23.P31725   | BLK       | Hs.146591 | B lymphoid tyrosine kinase                                       | Homo sapiens B lymphoid tyrosine kinase (BLK), mRNA [NM_001715]                                                                | 3.37837 | down | 3.78097 | down | 10.29856   | 36.02604    | 11.48014   | 38.27507    | Compromised | Detected | Compromised | Detected    |
| 5415 | A_24.P291826  | SYTL3     | Hs.436977 | synaptotagmin-like 3                                             | Homo sapiens synaptotagmin-like 3 (SYTL3), mRNA [NM_001009991]                                                                 | 3.37522 | down | 3.61795 | down | 107.96881  | 377.34042   | 119.45279  | 381.08698   | Detected    | Detected | Detected    | Detected    |
| 5416 | A_24.P69095   | ENC1      | Hs.104925 | ectodermal-neural cortex (with BTB-like domain)                  | Homo sapiens ectodermal-neural cortex (with BTB-like domain) (ENC1), mRNA [NM_003633]                                          | 3.37495 | down | 3.39032 | down | 223.46048  | 780.91060   | 217.75276  | 650.98410   | Detected    | Detected | Detected    | Detected    |
| 5417 | A_33.P3316835 |           |           |                                                                  | Uncharacterized protein C4orf21 [Source:UniProtKB/Swiss-Prot;Acc:Q8BYA3;ENST00000264370]                                       | 3.37477 | down | 3.83404 | down | 18.79868   | 65.69080    | 7.65548    | 25.88180    | Detected    | Detected | Compromised | Detected    |
| 5418 | A_24.P124349  | PDGFD     | Hs.352298 | platelet derived growth factor D                                 | Homo sapiens platelet derived growth factor D (PDGFD), transcript variant 1, mRNA [NM_025208]                                  | 3.37415 | down | 3.84982 | down | 16.62358   | 58.07933    | 13.00552   | 44.15033    | Detected    | Detected | Compromised | Detected    |
| 5419 | A_23.P218131  | INF2      | Hs.24956  | inverted formin, FH2 and WH2 domain containing                   | Homo sapiens inverted formin, FH2 and WH2 domain containing (INF2), transcript variant 3, mRNA [NM_032714]                     | 3.37374 | down | 3.51376 | down | 3484.78120 | 12173.64200 | 3088.35670 | 9568.97600  | Detected    | Detected | Detected    | Detected    |
| 5420 | A_32.P806841  | ARL4A     | Hs.245540 | ADP-ribosylation factor-like 4A                                  | Homo sapiens ADP-ribosylation factor-like 4A (ARL4A), transcript variant 1, mRNA [NM_005738]                                   | 3.37374 | down | 2.83190 | down | 214.72679  | 750.11957   | 118.97802  | 297.10507   | Detected    | Detected | Detected    | Detected    |
| 5421 | A_23.P91512   | CLDN14    | Hs.660278 | claudin 14                                                       | Homo sapiens claudin 14 (CLDN14), transcript variant 1, mRNA [NM_144492]                                                       | 3.37259 | down | 4.24126 | down | 23.47915   | 81.99339    | 10.71079   | 40.05732    | Detected    | Detected | Compromised | Detected    |
| 5422 | A_33.P3344229 | HIST1H4A  | Hs.248178 | histone cluster 1, H4a                                           | Homo sapiens histone cluster 1, H4a (HIST1H4A), mRNA [NM_003538]                                                               | 3.36936 | down | 2.78545 | down | 168.59038  | 588.18440   | 47.36457   | 116.33629   | Detected    | Detected | Detected    | Detected    |
| 5423 | A_23.P128532  | C12orf45  | Hs.295563 | chromosome 12 open reading frame 45                              | Homo sapiens chromosome 12 open reading frame 45 (C12orf45), mRNA [NM_152318]                                                  | 3.36765 | down | 3.53579 | down | 1417.38510 | 4942.51760  | 989.75440  | 3085.88350  | Detected    | Detected | Detected    | Detected    |
| 5424 | A_33.P3275495 | LOC400743 | Hs.522935 | FLJ45933 protein                                                 | PREDICTED: Homo sapiens FLJ45933 protein (LOC400743), mRNA [XM_001719656]                                                      | 3.36691 | down | 1.94756 | down | 334.55240  | 1166.35010  | 30.10249   | 51.69611    | Detected    | Detected | Detected    | Detected    |
| 5425 | A_24.P84608   |           |           |                                                                  |                                                                                                                                | 3.36235 | down | 2.90525 | down | 367.15674  | 1278.28600  | 153.59040  | 393.47174   | Detected    | Detected | Detected    | Detected    |
| 5426 | A_33.P3244882 | EIF2C3    | Hs.657659 | eukaryotic translation initiation factor 2C, 3                   | Homo sapiens eukaryotic translation initiation factor 2C, 3 (EIF2C3), transcript variant 1, mRNA [NM_024852]                   | 3.36179 | down | 3.52148 | down | 358.69272  | 1248.60660  | 335.00763  | 1040.26930  | Detected    | Detected | Detected    | Detected    |
| 5427 | A_33.P3306024 | SIGLEC16  |           | sialic acid binding Ig-like lectin 16 (gene/pseudogene)          | Homo sapiens sialic acid binding Ig-like lectin 16 (gene/pseudogene) (SIGLEC16), non-coding RNA [NR_002825]                    | 3.36037 | down | 3.32248 | down | 1254.20850 | 4364.05500  | 561.81570  | 1645.97180  | Detected    | Detected | Detected    | Detected    |
| 5428 | A_23.P82379   | CACNA2D1  | Hs.282151 | calcium channel, voltage-dependent, alpha 2/delta subunit 1      | Homo sapiens calcium channel, voltage-dependent, alpha 2/delta subunit 1 (CACNA2D1), mRNA [NM_000722]                          | 3.35881 | down | 2.79143 | down | 13.14338   | 45.71158    | 14.18157   | 34.90727    | Compromised | Detected | Compromised | Detected    |
| 5429 | A_33.P3245168 | FAM71F2   | Hs.445236 | family with sequence similarity 71, member F2                    | Homo sapiens family with sequence similarity 71, member F2 (FAM71F2), transcript variant 2, mRNA [NM_001128926]                | 3.35537 | down | 4.71862 | down | 13.58868   | 47.14237    | 8.66985    | 36.07378    | Compromised | Detected | Compromised | Detected    |
| 5430 | A_23.P164826  | RNASEH2A  | Hs.532851 | ribonuclease H2, subunit A                                       | Homo sapiens ribonuclease H2, subunit A (RNASEH2A), mRNA [NM_006397]                                                           | 3.35310 | down | 3.90665 | down | 2053.90160 | 7131.15040  | 2164.36350 | 7455.89750  | Detected    | Detected | Detected    | Detected    |
| 5431 | A_32.P116271  | C4orf12   |           | chromosome 4 open reading frame 12                               | Homo sapiens chromosome 4 open reading frame 12 (C4orf12), non-coding RNA [NR_015355]                                          | 3.35278 | down | 3.36016 | down | 96.27262   | 334.22702   | 98.83054   | 292.83070   | Detected    | Detected | Detected    | Detected    |
| 5432 | A_24.P258051  | MASTL     | Hs.276905 | microtubule associated serine/threonine kinase-like              | Homo sapiens microtubule associated serine/threonine kinase-like (MASTL), mRNA [NM_032844]                                     | 3.35198 | down | 3.13418 | down | 235.41441  | 817.08545   | 204.54713  | 565.30480   | Detected    | Detected | Detected    | Detected    |
| 5433 | A_23.P101380  | B3GNT8    | Hs.441681 | UDP-GlcNAc:betaGal beta-1,3-N-acetylglucosaminyltransferase 8    | Homo sapiens UDP-GlcNAc:betaGal beta-1,3-N-acetylglucosaminyltransferase 8 (B3GNT8), mRNA [NM_198540]                          | 3.34853 | down | 3.53960 | down | 541.66956  | 1878.11120  | 432.96918  | 1351.37850  | Detected    | Detected | Detected    | Detected    |
| 5434 | A_33.P3305840 | SFRS7     | Hs.309090 | splicing factor, arginine/serine-rich 7, 35kDa                   | Homo sapiens splicing factor, arginine/serine-rich 7, 35kDa (SFRS7), mRNA [NM_001031684]                                       | 3.34813 | down | 3.24653 | down | 5269.89600 | 18269.95700 | 4822.97700 | 13807.04200 | Detected    | Detected | Detected    | Detected    |
| 5435 | A_23.P140057  | TNFRSF19  | Hs.149168 | tumor necrosis factor receptor superfamily, member 19            | Homo sapiens tumor necrosis factor receptor superfamily, member 19 (TNFRSF19), transcript variant 1, mRNA [NM_018647]          | 3.34780 | down | 2.74817 | down | 6.51908    | 22.59849    | 4.57305    | 11.08194    | Compromised | Detected | Compromised | Compromised |
| 5436 | A_23.P116414  | PLA2G16   | Hs.502775 | phospholipase A2, group XVI                                      | Homo sapiens phospholipase A2, group XVI (PLA2G16), transcript variant 1, mRNA [NM_007069]                                     | 3.34527 | down | 3.72630 | down | 1151.05590 | 3987.13000  | 813.60315  | 2673.35130  | Detected    | Detected | Detected    | Detected    |

|      |               |           |           |                                                                                     |                                                                                                                                                                        |         |      |         |      |            |             |            |             |             |          |             |             |
|------|---------------|-----------|-----------|-------------------------------------------------------------------------------------|------------------------------------------------------------------------------------------------------------------------------------------------------------------------|---------|------|---------|------|------------|-------------|------------|-------------|-------------|----------|-------------|-------------|
| 5437 | A_23_P259692  | PSAT1     | Hs.494261 | phosphoserine aminotransferase 1                                                    | Homo sapiens phosphoserine aminotransferase 1 (PSAT1), transcript variant 1, mRNA [NM_058179]                                                                          | 3.34414 | down | 3.19293 | down | 2168.18140 | 7507.80270  | 1129.59960 | 3180.38770  | Detected    | Detected | Detected    | Detected    |
| 5438 | A_23_P161727  | HSPB2     | Hs.709660 | heat shock 27kDa protein 2                                                          | Homo sapiens heat shock 27kDa protein 2 (HSPB2), mRNA [NM_001541]                                                                                                      | 3.34362 | down | 3.32261 | down | 4778.94700 | 16545.60200 | 3946.50700 | 11562.66000 | Detected    | Detected | Detected    | Detected    |
| 5439 | A_33_P3284045 | NEK10     | Hs.506115 | NIMA (never in mitosis gene a)-related kinase 10                                    | Homo sapiens NIMA (never in mitosis gene a)-related kinase 10 (NEK10), transcript variant 3, mRNA [NM_199347]                                                          | 3.33961 | down | 5.57757 | down | 6.68653    | 23.12226    | 3.30909    | 16.27492    | Compromised | Detected | Compromised | Detected    |
| 5440 | A_24_P270829  | GP1BA     | Hs.1472   | glycoprotein Ib (platelet), alpha polypeptide                                       | Homo sapiens glycoprotein Ib (platelet), alpha polypeptide (GP1BA), mRNA [NM_000173]                                                                                   | 3.33202 | down | 1.83617 | down | 23.15328   | 79.88281    | 14.87222   | 24.07992    | Detected    | Detected | Detected    | Detected    |
| 5441 | A_33_P3242124 | HAUS8     | Hs.404088 | HAUS augmin-like complex, subunit 8                                                 | Homo sapiens HAUS augmin-like complex, subunit 8 (HAUS8), transcript variant 1, mRNA [NM_033417]                                                                       | 3.33193 | down | 3.17718 | down | 117.90477  | 406.78058   | 110.64299  | 309.97860   | Detected    | Detected | Detected    | Detected    |
| 5442 | A_24_P319923  | MYLK      | Hs.477375 | myosin light chain kinase                                                           | Homo sapiens myosin light chain kinase (MYLK), transcript variant 1, mRNA [NM_053025]                                                                                  | 3.33130 | down | 3.51105 | down | 1076.15450 | 3712.11720  | 786.66473  | 2435.52510  | Detected    | Detected | Detected    | Detected    |
| 5443 | A_23_P215819  | ZNF655    | Hs.599798 | zinc finger protein 655                                                             | Homo sapiens zinc finger protein 655 (ZNF655), transcript variant 2, mRNA [NM_024061]                                                                                  | 3.32872 | down | 3.44040 | down | 521.18570  | 1796.40010  | 461.00497  | 1398.55690  | Detected    | Detected | Detected    | Detected    |
| 5444 | A_33_P3346348 | WDR67     | Hs.492716 | WD repeat domain 67                                                                 | Homo sapiens WD repeat domain 67 (WDR67), transcript variant 2, mRNA [NM_001145088]                                                                                    | 3.32861 | down | 2.34793 | down | 6.36736    | 21.94600    | 4.71907    | 9.77026     | Compromised | Detected | Compromised | Compromised |
| 5445 | A_32_P34920   | FOXD1     | Hs.519385 | forkhead box D1                                                                     | Homo sapiens forkhead box D1 (FOXD1), mRNA [NM_004472]                                                                                                                 | 3.32843 | down | 3.08698 | down | 5160.05900 | 17783.90000 | 4136.47700 | 11259.78700 | Detected    | Detected | Detected    | Detected    |
| 5446 | A_24_P166663  | CDK6      | Hs.119882 | cyclin-dependent kinase 6                                                           | Homo sapiens cyclin-dependent kinase 6 (CDK6), mRNA [NM_001259]                                                                                                        | 3.32586 | down | 3.03303 | down | 3692.00600 | 12714.48800 | 2710.45950 | 7249.11570  | Detected    | Detected | Detected    | Detected    |
| 5447 | A_23_P60488   | ODF2      | Hs.129055 | outer dense fiber of sperm tails 2                                                  | Homo sapiens outer dense fiber of sperm tails 2 (ODF2), transcript variant 1, mRNA [NM_002540]                                                                         | 3.32533 | down | 3.15767 | down | 455.24330  | 1567.51180  | 440.88160  | 1227.59390  | Detected    | Detected | Detected    | Detected    |
| 5448 | A_23_P5785    | BBS5      | Hs.233398 | Bardet-Biedl syndrome 5                                                             | Homo sapiens Bardet-Biedl syndrome 5 (BBS5), mRNA [NM_152384]                                                                                                          | 3.32285 | down | 3.25144 | down | 77.82369   | 267.76580   | 65.52163   | 187.85620   | Detected    | Detected | Detected    | Detected    |
| 5449 | A_33_P3409392 | FZD6      | Hs.591863 | frizzled homolog 6 (Drosophila)                                                     | Homo sapiens frizzled homolog 6 (Drosophila) (FZD6), transcript variant 1, mRNA [NM_003506]                                                                            | 3.32278 | down | 3.05770 | down | 743.55010  | 2558.26250  | 432.54324  | 1166.24600  | Detected    | Detected | Detected    | Detected    |
| 5450 | A_23_P70670   | CD83      | Hs.595133 | CD83 molecule                                                                       | Homo sapiens CD83 molecule (CD83), transcript variant 1, mRNA [NM_004233]                                                                                              | 3.32146 | down | 3.33656 | down | 109.50832  | 376.62500   | 99.16966   | 291.77164   | Detected    | Detected | Detected    | Detected    |
| 5451 | A_32_P150086  | LOC284232 | Hs.633153 | ankyrin repeat domain 20 family, member A2 pseudogene                               | Homo sapiens ankyrin repeat domain 20 family, member A2 pseudogene (LOC284232), non-coding RNA [NR_027995]                                                             | 3.32056 | down | 1.15992 | down | 6.08420    | 20.91937    | 7.41386    | 7.58294     | Compromised | Detected | Compromised | Compromised |
| 5452 | A_33_P3362326 | FHL2      |           | four and a half LIM domains 2                                                       | Four and a half LIM domains protein 2 (FHL-2)/Skeletal muscle LIM-protein 3/SLIM 3(LIM domain protein DRAL) [Source:UniProtKB/Swiss-Prot;Acc:Q14192] [ENST00000409177] | 3.32012 | down | 3.67956 | down | 1444.09670 | 4964.58100  | 798.77136  | 2591.69240  | Detected    | Detected | Detected    | Detected    |
| 5453 | A_33_P3416414 |           |           |                                                                                     |                                                                                                                                                                        | 3.31945 | down | 3.55309 | down | 89.77190   | 308.56020   | 59.90820   | 187.69743   | Detected    | Detected | Detected    | Detected    |
| 5454 | A_23_P155103  | ADSL      | Hs.75527  | adenylosuccinate lyase                                                              | Homo sapiens adenylosuccinate lyase (ADSL), transcript variant 1, mRNA [NM_000026]                                                                                     | 3.31708 | down | 3.41019 | down | 1015.10710 | 3486.59470  | 1118.49280 | 3363.38940  | Detected    | Detected | Detected    | Detected    |
| 5455 | A_33_P3426943 | LOC151484 | Hs.559309 | hypothetical protein LOC151484                                                      | Homo sapiens hypothetical protein LOC151484, mRNA (cDNA clone IMAGE5180745), partial cds [BC043555]                                                                    | 3.31423 | down | 1.00262 | down | 8.63074    | 29.61856    | 18.66737   | 16.50391    | Compromised | Detected | Detected    | Detected    |
| 5456 | A_23_P42868   | IGFBP1    | Hs.642938 | insulin-like growth factor binding protein 1                                        | Homo sapiens insulin-like growth factor binding protein 1 (IGFBP1), mRNA [NM_000596]                                                                                   | 3.31350 | down | 3.18555 | down | 24.29037   | 83.34016    | 21.46993   | 60.30876    | Detected    | Detected | Detected    | Detected    |
| 5457 | A_23_P500130  | KANK1     | Hs.306764 | KN motif and ankyrin repeat domains 1                                               | Homo sapiens KN motif and ankyrin repeat domains 1 (KANK1), transcript variant 2, mRNA [NM_153186]                                                                     | 3.30805 | down | 3.30993 | down | 2456.86500 | 8415.63600  | 1905.91350 | 5562.71730  | Detected    | Detected | Detected    | Detected    |
| 5458 | A_23_P154208  | NAGK      | Hs.7036   | N-acetylglucosamine kinase                                                          | Homo sapiens N-acetylglucosamine kinase (NAGK), mRNA [NM_017567]                                                                                                       | 3.30744 | down | 3.63006 | down | 2881.11900 | 9867.02300  | 3229.71310 | 10338.17100 | Detected    | Detected | Detected    | Detected    |
| 5459 | A_23_P69497   | CLEC3B    | Hs.476092 | C-type lectin domain family 3, member B                                             | Homo sapiens C-type lectin domain family 3, member B (CLEC3B), mRNA [NM_003278]                                                                                        | 3.30717 | down | 3.81428 | down | 1889.17930 | 6469.37450  | 1760.17680 | 5920.17300  | Detected    | Detected | Detected    | Detected    |
| 5460 | A_23_P142096  | GPR32     | Hs.515555 | G protein-coupled receptor 32                                                       | Homo sapiens G protein-coupled receptor 32 (GPR32), mRNA [NM_001506]                                                                                                   | 3.30509 | down | 3.79474 | down | 348.25983  | 1191.84570  | 22.37827   | 74.88146    | Detected    | Detected | Detected    | Detected    |
| 5461 | A_23_P321511  | MARCH3    | Hs.132441 | membrane-associated ring finger (C3HC4) 3                                           | Homo sapiens membrane-associated ring finger (C3HC4) 3 (MARCH3), mRNA [NM_178450]                                                                                      | 3.30469 | down | 3.27205 | down | 273.87903  | 937.18030   | 309.50952  | 893.01570   | Detected    | Detected | Detected    | Detected    |
| 5462 | A_23_P150362  | TEX12     | Hs.524039 | testis expressed 12                                                                 | Homo sapiens testis expressed 12 (TEX12), mRNA [NM_031275]                                                                                                             | 3.30098 | down | 5.05924 | down | 9.92451    | 33.92230    | 5.93096    | 26.45913    | Compromised | Detected | Compromised | Detected    |
| 5463 | A_23_P255376  | CCDC109B  | Hs.234149 | coiled-coil domain containing 109B                                                  | Homo sapiens coiled-coil domain containing 109B (CCDC109B), mRNA [NM_017918]                                                                                           | 3.30003 | down | 3.55933 | down | 1293.94420 | 4421.46500  | 857.87756  | 2692.51760  | Detected    | Detected | Detected    | Detected    |
| 5464 | A_23_P161352  | PTPLA     | Hs.114062 | protein tyrosine phosphatase-like (proline instead of catalytic arginine), member A | Homo sapiens protein tyrosine phosphatase-like (proline instead of catalytic arginine), member A (PTPLA), mRNA [NM_014241]                                             | 3.29994 | down | 2.95801 | down | 574.96970  | 1964.64640  | 568.94574  | 1484.00600  | Detected    | Detected | Detected    | Detected    |
| 5465 | A_23_P500433  | CARD9     | Hs.694071 | caspase recruitment domain family, member 9                                         | Homo sapiens caspase recruitment domain family, member 9 (CARD9), transcript variant 1, mRNA [NM_052813]                                                               | 3.29775 | down | 3.71294 | down | 134.55565  | 459.46527   | 113.10810  | 370.31960   | Detected    | Detected | Detected    | Detected    |
| 5466 | A_23_P19590   | EZR       | Hs.487027 | ezrin                                                                               | Homo sapiens ezrin (EZR), transcript variant 1, mRNA [NM_003379]                                                                                                       | 3.29730 | down | 3.41749 | down | 2815.78980 | 9613.72500  | 2709.49930 | 8165.10900  | Detected    | Detected | Detected    | Detected    |

|      |               |          |           |                                                                                        |                                                                                                                                                                                                                      |         |      |         |      |            |            |            |            |             |          |             |             |
|------|---------------|----------|-----------|----------------------------------------------------------------------------------------|----------------------------------------------------------------------------------------------------------------------------------------------------------------------------------------------------------------------|---------|------|---------|------|------------|------------|------------|------------|-------------|----------|-------------|-------------|
| 5467 | A_23_P214907  | MTHFD1L  | Hs.591343 | methylenetetrahydrofolate dehydrogenase (NADP+ dependent) 1-like                       | Homo sapiens methylenetetrahydrofolate dehydrogenase (NADP+ dependent) 1-like (MTHFD1L), mRNA [NM_015440]                                                                                                            | 3.29447 | down | 3.27333 | down | 590.04315  | 2012.81040 | 437.22385  | 1261.99940 | Detected    | Detected | Detected    | Detected    |
| 5468 | A_24_P398500  | MPHOSPH9 | Hs.577404 | M-phase phosphoprotein 9                                                               | Homo sapiens M-phase phosphoprotein 9 (MPHOSPH9), mRNA [NM_027392]                                                                                                                                                   | 3.29437 | down | 3.59928 | down | 32.21681   | 109.89767  | 31.94882   | 101.39949  | Detected    | Detected | Detected    | Detected    |
| 5469 | A_33_P3403867 | PMEPA1   | Hs.517155 | prostate transmembrane protein, androgen induced 1                                     | Homo sapiens prostate transmembrane protein, androgen induced 1 (PMEPA1), transcript variant 1, mRNA [NM_020182]                                                                                                     | 3.29262 | down | 3.47231 | down | 776.55720  | 2647.57470 | 671.12210  | 2054.87800 | Detected    | Detected | Detected    | Detected    |
| 5470 | A_33_P3268974 | RECQL5   | Hs.632229 | RecQ protein-like 5                                                                    | Homo sapiens RecQ protein-like 5 (RECQL5), transcript variant 2, mRNA [NM_001003715]                                                                                                                                 | 3.29250 | down | 3.80106 | down | 41.53461   | 141.60170  | 27.91610   | 93.56759   | Detected    | Detected | Detected    | Detected    |
| 5471 | A_24_P229025  |          | Hs.377070 |                                                                                        | Glutamate receptor 3 Precursor (GluR-3)(GluR-C)(GluR-K3)(Glutamate receptor ionotropic, AMPA 3)(AMPA-selective glutamate receptor 3) [Source:UniProtKB/Swiss-Prot;Acc:P42263] [ENST00000371264]                      | 3.29040 | down | 3.31064 | down | 106.90501  | 364.23340  | 95.73006   | 279.46430  | Detected    | Detected | Detected    | Detected    |
| 5472 | A_33_P3210671 | GPAT2    | Hs.348629 | glycerol-3-phosphate acyltransferase 2, mitochondrial                                  | Homo sapiens glycerol-3-phosphate acyltransferase 2, mitochondrial (GPAT2), nuclear gene encoding mitochondrial protein, mRNA [NM_207328]                                                                            | 3.28798 | down | 5.63737 | down | 99.58111   | 339.03033  | 54.67298   | 271.77814  | Detected    | Detected | Detected    | Detected    |
| 5473 | A_33_P3388312 | SKAP2    | Hs.200770 | src kinase associated phosphoprotein 2                                                 | Homo sapiens src kinase associated phosphoprotein 2 (SKAP2), mRNA [NM_003930]                                                                                                                                        | 3.28653 | down | 3.16492 | down | 1254.76500 | 4270.05660 | 924.84290  | 2581.05130 | Detected    | Detected | Detected    | Detected    |
| 5474 | A_23_P52121   | PDZK1    | Hs.444751 | PDZ domain containing 1                                                                | Homo sapiens PDZ domain containing 1 (PDZK1), mRNA [NM_002614]                                                                                                                                                       | 3.28453 | down | 4.23695 | down | 50.10766   | 170.41618  | 28.51170   | 106.52268  | Detected    | Detected | Detected    | Detected    |
| 5475 | A_23_P94998   | LETM1    | Hs.120165 | leucine zipper-EF-hand containing transmembrane protein 1                              | Homo sapiens leucine zipper-EF-hand containing transmembrane protein 1 (LETM1), nuclear gene encoding mitochondrial protein, mRNA [NM_012318]                                                                        | 3.28387 | down | 3.36291 | down | 675.00530  | 2295.22680 | 774.48865  | 2296.65360 | Detected    | Detected | Detected    | Detected    |
| 5476 | A_24_P279489  | VPS53    | Hs.461819 | vacuolar protein sorting 53 homolog (S. cerevisiae)                                    | Homo sapiens vacuolar protein sorting 53 homolog (S. cerevisiae) (VPS53), transcript variant 1, mRNA [NM_001128159]                                                                                                  | 3.28249 | down | 2.73077 | down | 58.71769   | 199.57472  | 49.73733   | 119.76593  | Detected    | Detected | Detected    | Detected    |
| 5477 | A_33_P3356711 | ING3     | Hs.489811 | inhibitor of growth family, member 3                                                   | Homo sapiens inhibitor of growth family, member 3 (ING3), transcript variant 3, mRNA [NM_199267]                                                                                                                     | 3.28179 | down | 3.55419 | down | 344.33603  | 1170.11010 | 309.24940  | 969.20440  | Detected    | Detected | Detected    | Detected    |
| 5478 | A_23_P429998  | FOSB     | Hs.590958 | FBJ murine osteosarcoma viral oncogene homolog B                                       | Homo sapiens FBJ murine osteosarcoma viral oncogene homolog B (FOSB), transcript variant 1, mRNA [NM_006732]                                                                                                         | 3.28040 | down | 4.01334 | down | 246.31786  | 836.67290  | 154.63303  | 547.23505  | Detected    | Detected | Detected    | Detected    |
| 5479 | A_23_P256632  | PGGT1B   | Hs.254006 | protein geranylgeranyltransferase type I, beta subunit                                 | Homo sapiens protein geranylgeranyltransferase type I, beta subunit (PGGT1B), mRNA [NM_005023]                                                                                                                       | 3.27865 | down | 2.43752 | down | 35.42237   | 120.25584  | 36.57559   | 78.61488   | Detected    | Detected | Detected    | Detected    |
| 5480 | A_33_P3267380 | SGCD     | Hs.387207 | sarcoglycan, delta (35kDa dystrophin-associated glycoprotein)                          | Homo sapiens sarcoglycan, delta (35kDa dystrophin-associated glycoprotein) (SGCD), transcript variant 2, mRNA [NM_172244]                                                                                            | 3.27793 | down | 2.67283 | down | 251.89944  | 854.98690  | 196.61067  | 463.38718  | Detected    | Detected | Detected    | Detected    |
| 5481 | A_33_P3619171 | PMAIP1   | Hs.96     | phorbol-12-myristate-13-acetate-induced protein 1                                      | Homo sapiens phorbol-12-myristate-13-acetate-induced protein 1 (PMAIP1), mRNA [NM_021127]                                                                                                                            | 3.27635 | down | 3.14450 | down | 1125.90720 | 3819.66650 | 894.84045  | 2481.20780 | Detected    | Detected | Detected    | Detected    |
| 5482 | A_33_P3417339 | SHROOM3  | Hs.702168 | shroom family member 3                                                                 | Homo sapiens shroom family member 3 (SHROOM3), mRNA [NM_020859]                                                                                                                                                      | 3.27601 | down | 3.31970 | down | 47.93352   | 162.59892  | 44.02505   | 128.87367  | Detected    | Detected | Detected    | Detected    |
| 5483 | A_23_P88234   | FAM158A  | Hs.271614 | family with sequence similarity 158, member A                                          | Homo sapiens family with sequence similarity 158, member A (FAM158A), mRNA [NM_016049]                                                                                                                               | 3.27317 | down | 3.18411 | down | 553.35864  | 1875.46370 | 659.58844  | 1851.94070 | Detected    | Detected | Detected    | Detected    |
| 5484 | A_23_P210425  | MYL9     | Hs.504687 | myosin, light chain 9, regulatory                                                      | Homo sapiens myosin, light chain 9, regulatory (MYL9), transcript variant 2, mRNA [NM_181526]                                                                                                                        | 3.27241 | down | 3.72767 | down | 2269.80050 | 7691.10200 | 2354.34470 | 7738.79100 | Detected    | Detected | Detected    | Detected    |
| 5485 | A_24_P48248   | C17orf53 | Hs.437059 | chromosome 17 open reading frame 53                                                    | Homo sapiens chromosome 17 open reading frame 53 (C17orf53), mRNA [NM_024032]                                                                                                                                        | 3.27212 | down | 3.09711 | down | 60.70640   | 205.68228  | 66.02950   | 180.32646  | Detected    | Detected | Detected    | Detected    |
| 5486 | A_24_P66545   | KIAA0226 | Hs.478868 | KIAA0226                                                                               | Homo sapiens KIAA0226 (KIAA0226), transcript variant 1, mRNA [NM_001145642]                                                                                                                                          | 3.26957 | down | 2.82138 | down | 8.19863    | 27.75651   | 11.03095   | 27.44350   | Compromised | Detected | Compromised | Detected    |
| 5487 | A_33_P3209866 | KANK1    | Hs.306764 | KN motif and ankyrin repeat domains 1                                                  | Homo sapiens KN motif and ankyrin repeat domains 1 (KANK1), transcript variant 2, mRNA [NM_153186]                                                                                                                   | 3.26931 | down | 3.40492 | down | 830.72320  | 2812.19780 | 811.87800  | 2437.60620 | Detected    | Detected | Detected    | Detected    |
| 5488 | A_24_P303497  |          | Hs.279008 |                                                                                        | DNA replication licensing factor MCM9 (Mini-chromosome maintenance deficient 9)(hMCM9)(Mini-chromosome maintenance deficient domain-containing protein 1) [Source:UniProtKB/Swiss-Prot;Acc:G9KXL5] [ENST00000316316] | 3.26863 | down | 2.05182 | down | 6.78574    | 22.96652   | 9.11193    | 16.48603   | Compromised | Detected | Compromised | Detected    |
| 5489 | A_32_P29118   | SEMA3D   | Hs.201340 | sema domain, immunoglobulin domain (Ig), short basic domain, secreted, (semaphorin) 3D | Homo sapiens sema domain, immunoglobulin domain (Ig), short basic domain, secreted, (semaphorin) 3D (SEMA3D), mRNA [NM_152754]                                                                                       | 3.26625 | down | 2.89248 | down | 9.23622    | 31.23748   | 2.59148    | 6.60972    | Compromised | Detected | Compromised | Compromised |
| 5490 | A_33_P3231750 | ZNF738   | Hs.124384 | zinc finger protein 738                                                                | Homo sapiens zinc finger protein 738 (ZNF738), non-coding RNA [NR_027130]                                                                                                                                            | 3.26329 | down | 2.95532 | down | 60.09609   | 203.06493  | 55.84734   | 145.53680  | Detected    | Detected | Detected    | Detected    |
| 5491 | A_23_P431252  | KBTBD8   | Hs.116665 | kelch repeat and BTB (POZ) domain containing 8                                         | Homo sapiens kelch repeat and BTB (POZ) domain containing 8 (KBTBD8), mRNA [NM_032505]                                                                                                                               | 3.26223 | down | 3.03922 | down | 81.72367   | 276.05527  | 56.79502   | 152.20795  | Detected    | Detected | Detected    | Detected    |



|      |               |           |           |                                                                        |                                                                                                                             |                                                                                                                                        |         |         |         |             |              |             |             |             |          |             |          |          |
|------|---------------|-----------|-----------|------------------------------------------------------------------------|-----------------------------------------------------------------------------------------------------------------------------|----------------------------------------------------------------------------------------------------------------------------------------|---------|---------|---------|-------------|--------------|-------------|-------------|-------------|----------|-------------|----------|----------|
| 5492 | A_24_P672240  | FRMPD4    |           |                                                                        | FERM and PDZ domain containing 4                                                                                            | FERM and PDZ domain-containing protein 4 (PDZ domain-containing protein 10) [Source:UniProtKB/Swiss-Prot;Acc:Q14CM0] [ENST00000380882] | 3.26178 | down    | 4.91967 | down        | 25.24073     | 85.24902    | 17.97349    | 77.97111    | Detected | Detected    | Detected | Detected |
| 5493 | A_33_P3296230 |           |           |                                                                        |                                                                                                                             |                                                                                                                                        | 3.25643 | down    | 4.97936 | down        | 26.60233     | 89.70039    | 14.22454    | 62.45644    | Detected | Detected    | Detected | Detected |
| 5494 | A_32_P201496  | POLR3H    | Hs.712617 | polymerase (RNA) III (DNA directed) polypeptide H (22.9kD)             | Homo sapiens polymerase (RNA) III (DNA directed) polypeptide H (22.9kD) (POLR3H), transcript variant 2, mRNA [NM_001018052] | 3.25540                                                                                                                                | down    | 3.26996 | down    | 506.32710   | 1706.74510   | 597.65393   | 1723.28660  | Detected    | Detected | Detected    | Detected |          |
| 5495 | A_33_P3390024 |           |           |                                                                        |                                                                                                                             |                                                                                                                                        | 3.25329 | down    | 3.13203 | down        | 113.89349    | 383.66670   | 99.27887    | 274.18750   | Detected | Detected    | Detected | Detected |
| 5496 | A_23_P159956  | MID2      | Hs.12256  | midline 2                                                              | Homo sapiens midline 2 (MID2), transcript variant 1, mRNA [NM_012216]                                                       | 3.25123                                                                                                                                | down    | 3.64521 | down    | 205.57144   | 692.05960    | 135.97160   | 437.05478   | Detected    | Detected | Detected    | Detected |          |
| 5497 | A_33_P3411907 | FGF5      | Hs.37055  | fibroblast growth factor 5                                             | Homo sapiens fibroblast growth factor 5 (FGF5), transcript variant 2, mRNA [NM_033143]                                      | 3.24854                                                                                                                                | down    | 3.86059 | down    | 36.30327    | 122.11438    | 52.76553    | 179.62602   | Detected    | Detected | Detected    | Detected |          |
| 5498 | A_23_P2423    | MAGOHB    | Hs.104650 | mago-nashi homolog B (Drosophila)                                      | Homo sapiens mago-nashi homolog B (Drosophila) (MAGOHB), mRNA [NM_018048]                                                   | 3.24822                                                                                                                                | down    | 2.95450 | down    | 1979.17260  | 6656.75100   | 1842.89270  | 4801.19730  | Detected    | Detected | Detected    | Detected |          |
| 5499 | A_33_P3377691 | C4orf46   | Hs.380920 | chromosome 4 open reading frame 46                                     | Homo sapiens chromosome 4 open reading frame 46 (C4orf46), mRNA [NM_001008393]                                              | 3.24808                                                                                                                                | down    | 3.24011 | down    | 291.06967   | 978.94006    | 223.33296   | 638.08420   | Detected    | Detected | Detected    | Detected |          |
| 5500 | A_23_P409093  | ANO4      | Hs.58785  | anoctamin 4                                                            | Homo sapiens anoctamin 4 (ANO4), mRNA [NM_178526]                                                                           | 3.24367                                                                                                                                | down    | 4.17703 | down    | 90.61234    | 304.33844    | 52.78136    | 194.40788   | Detected    | Detected | Detected    | Detected |          |
| 5501 | A_33_P3382565 | KIF26B    | Hs.368096 | kinesin family member 26B                                              | Homo sapiens kinesin family member 26B (KIF26B), mRNA [NM_018012]                                                           | 3.24045                                                                                                                                | down    | 4.49135 | down    | 32.59782    | 109.37719    | 28.17286    | 111.57668   | Detected    | Detected | Detected    | Detected |          |
| 5502 | A_33_P3312642 | CXorf64   | Hs.130370 | chromosome X open reading frame 64                                     | Homo sapiens chromosome X open reading frame 64 (CXorf64), mRNA [NM_001122716]                                              | 3.23982                                                                                                                                | down    | 1.28130 | down    | 33.81626    | 113.44353    | 18.77553    | 21.21330    | Detected    | Detected | Detected    | Detected |          |
| 5503 | A_23_P137097  | SLC16A2   | Hs.75317  | solute carrier family 16, member 2 (monocarboxylic acid transporter 8) | Homo sapiens solute carrier family 16, member 2 (monocarboxylic acid transporter 8) (SLC16A2), mRNA [NM_006517]             | 3.23673                                                                                                                                | down    | 3.28655 | down    | 2224.80620  | 7456.44900   | 1511.55740  | 4380.56700  | Detected    | Detected | Detected    | Detected |          |
| 5504 | A_33_P3243023 | ADRA1D    | Hs.557    | adrenergic, alpha-1D-, receptor                                        | Homo sapiens adrenergic, alpha-1D-, receptor (ADRA1D), mRNA [NM_000678]                                                     | 3.23116                                                                                                                                | down    | 2.95062 | down    | 8.43609     | 28.22494     | 11.79499    | 30.68854    | Compromised | Detected | Compromised | Detected |          |
| 5505 | A_33_P3264926 | SAMD4A    | Hs.98259  | sterile alpha motif domain containing 4A                               | Homo sapiens sterile alpha motif domain containing 4A (SAMD4A), transcript variant 1, mRNA [NM_015589]                      | 3.22728                                                                                                                                | down    | 3.22882 | down    | 200.65475   | 670.53143    | 233.63144   | 665.18250   | Detected    | Detected | Detected    | Detected |          |
| 5506 | A_23_P49338   | TNFRSF12A | Hs.355899 | tumor necrosis factor receptor superfamily, member 12A                 | Homo sapiens tumor necrosis factor receptor superfamily, member 12A (TNFRSF12A), mRNA [NM_018639]                           | 3.22499                                                                                                                                | down    | 3.35525 | down    | 18841.79500 | 62919.28000  | 19337.05500 | 57211.10000 | Detected    | Detected | Detected    | Detected |          |
| 5507 | A_33_P3358914 | ARHGAP23  | Hs.374446 | Rho GTPase activating protein 23                                       | Homo sapiens Rho GTPase activating protein 23 (ARHGAP23), mRNA [NM_020876]                                                  | 3.22242                                                                                                                                | down    | 3.41034 | down    | 58.70537    | 195.88110    | 61.10496    | 183.75502   | Detected    | Detected | Detected    | Detected |          |
| 5508 | A_24_P334456  | ADAMTS6   | Hs.482291 | ADAM metalloproteinase with thrombospondin type 1 motif, 6             | Homo sapiens ADAM metalloproteinase with thrombospondin type 1 motif, 6 (ADAMTS6), mRNA [NM_197941]                         | 3.22221                                                                                                                                | down    | 4.69581 | down    | 9.31852     | 31.09095     | 5.58943     | 23.14423    | Compromised | Detected | Compromised | Detected |          |
| 5509 | A_23_P78092   | EV12A     | Hs.591198 | ecotropic viral integration site 2A                                    | Homo sapiens ecotropic viral integration site 2A (EV12A), transcript variant 1, mRNA [NM_001003927]                         | 3.22078                                                                                                                                | down    | 2.63514 | down    | 45.00799    | 150.10085    | 52.93210    | 122.99532   | Detected    | Detected | Detected    | Detected |          |
| 5510 | A_23_P326760  | MYRIP     | Hs.594535 | myosin VIIA and Rab interacting protein                                | Homo sapiens myosin VIIA and Rab interacting protein (MYRIP), mRNA [NM_015460]                                              | 3.21841                                                                                                                                | down    | 3.12196 | down    | 12.64973    | 42.15561     | 8.14695     | 22.42786    | Compromised | Detected | Compromised | Detected |          |
| 5511 | A_32_P3572    |           |           |                                                                        |                                                                                                                             | 3.21821                                                                                                                                | down    | 5.09577 | down    | 12.95191    | 43.15993     | 5.57263     | 25.04007    | Detected    | Detected | Compromised | Detected |          |
| 5512 | A_23_P11841   | ATP2B4    | Hs.343522 | ATPase, Ca++ transporting, plasma membrane 4                           | Homo sapiens ATPase, Ca++ transporting, plasma membrane 4 (ATP2B4), transcript variant 2, mRNA [NM_001884]                  | 3.21704                                                                                                                                | down    | 3.00257 | down    | 46.20483    | 153.91339    | 48.57132    | 128.59906   | Detected    | Detected | Detected    | Detected |          |
| 5513 | A_33_P3334102 | SH3D20    | Hs.205326 | SH3 domain containing 20                                               | Homo sapiens SH3 domain containing 20 (SH3D20), mRNA [NM_174919]                                                            | 3.21467                                                                                                                                | down    | 5.16139 | down    | 675.71606   | 2249.23050   | 353.16980   | 1607.37070  | Detected    | Detected | Detected    | Detected |          |
| 5514 | A_23_P156061  | LNPEP     | Hs.656905 | leucyl/cystinyl aminopeptidase                                         | Homo sapiens leucyl/cystinyl aminopeptidase (LNPEP), transcript variant 1, mRNA [NM_005575]                                 | 3.21194                                                                                                                                | down    | 3.24496 | down    | 87.57545    | 291.26157    | 71.33482    | 204.11552   | Detected    | Detected | Detected    | Detected |          |
| 5515 | A_23_P143958  | RPL22L1   | Hs.380933 | ribosomal protein L22-like 1                                           | Homo sapiens ribosomal protein L22-like 1 (RPL22L1), mRNA [NM_001099645]                                                    | 3.21181                                                                                                                                | down    | 3.04128 | down    | 36710.08600 | 122086.72000 | 27615.96300 | 74059.60000 | Detected    | Detected | Detected    | Detected |          |
| 5516 | A_23_P123071  | CAV2      | Hs.212332 | caveolin 2                                                             | Homo sapiens caveolin 2 (CAV2), transcript variant 1, mRNA [NM_001233]                                                      | 3.21087                                                                                                                                | down    | 3.39831 | down    | 2633.48170  | 8755.60450   | 2972.14090  | 8906.31600  | Detected    | Detected | Detected    | Detected |          |
| 5517 | A_33_P3341524 |           | Hs.541960 |                                                                        | Putative uncharacterized protein MGC10955 [Source:UniProtKB/TrEMBL;Acc:Q53S31] [ENST00000401851]                            | 3.20484                                                                                                                                | down    | 2.14478 | down    | 17.95732    | 59.59111     | 20.02930    | 37.88041    | Detected    | Detected | Detected    | Detected |          |
| 5518 | A_24_P192988  | CODC89    | Hs.376241 | coiled-coil domain containing 89                                       | Homo sapiens coiled-coil domain containing 89 (CODC89), mRNA [NM_152723]                                                    | 3.20182                                                                                                                                | down    | 4.09185 | down    | 44.48689    | 147.48987    | 38.00570    | 137.13028   | Detected    | Detected | Detected    | Detected |          |
| 5519 | A_24_P10137   | C13orf15  | Hs.507866 | chromosome 13 open reading frame 15                                    | Homo sapiens chromosome 13 open reading frame 15 (C13orf15), mRNA [NM_014059]                                               | 3.20147                                                                                                                                | down    | 3.16461 | down    | 1129.19130  | 3743.25880   | 977.29710   | 2727.17190  | Detected    | Detected | Detected    | Detected |          |
| 5520 | A_23_P252681  | PCYT1A    | Hs.135997 | phosphate cytidylyltransferase 1, choline, alpha                       | Homo sapiens phosphate cytidylyltransferase 1, choline, alpha (PCYT1A), mRNA [NM_005017]                                    | 3.19971                                                                                                                                | down    | 3.26293 | down    | 162.24466   | 537.54330    | 178.06259   | 512.32470   | Detected    | Detected | Detected    | Detected |          |

|      |               |              |           |                                                                                                                                        |                                                                                                                                                                                                   |         |      |         |      |             |              |             |              |             |          |             |             |
|------|---------------|--------------|-----------|----------------------------------------------------------------------------------------------------------------------------------------|---------------------------------------------------------------------------------------------------------------------------------------------------------------------------------------------------|---------|------|---------|------|-------------|--------------|-------------|--------------|-------------|----------|-------------|-------------|
| 5521 | A_23_P165668  |              |           |                                                                                                                                        | Solute carrier family 35 member F5 (Hepatitis C virus NS5A-transactivated protein 3) [Source:UniProtKB/Swiss-Prot;Acc:Q8WV83] [ENST00000409342]                                                   | 3.19812 | down | 3.52929 | down | 69.46373    | 230.03108    | 55.39851    | 172.40558    | Detected    | Detected | Detected    | Detected    |
| 5522 | A_23_P37702   | TPSAB1       | Hs.405479 | trypsin alpha/beta 1                                                                                                                   | Homo sapiens trypsin alpha/beta 1 (TPSAB1), mRNA [NM_003294]                                                                                                                                      | 3.19509 | down | 1.18317 | down | 5.43328     | 17.97537     | 2.89450     | 3.01986      | Compromised | Detected | Compromised | Compromised |
| 5523 | A_24_P943358  | DBF4         | Hs.485380 | DBF4 homolog (S. cerevisiae)                                                                                                           | Homo sapiens DBF4 homolog (S. cerevisiae) (DBF4), mRNA [NM_006716]                                                                                                                                | 3.19310 | down | 2.82759 | down | 6.91855     | 22.87499     | 4.25969     | 10.62089     | Compromised | Detected | Compromised | Compromised |
| 5524 | A_24_P734720  | CCNYL1       | Hs.471234 | cyclin Y-like 1                                                                                                                        | Homo sapiens cyclin Y-like 1 (CCNYL1), transcript variant 2, mRNA [NM_152523]                                                                                                                     | 3.19125 | down | 2.53512 | down | 172.19437   | 569.00070    | 92.47002    | 206.71158    | Detected    | Detected | Detected    | Detected    |
| 5525 | A_24_P943613  | TBC1D1       | Hs.176503 | TBC1 (tre-2/USP6, BUB2, cdc16) domain family, member 1                                                                                 | Homo sapiens TBC1 (tre-2/USP6, BUB2, cdc16) domain family, member 1 (TBC1D1), mRNA [NM_015173]                                                                                                    | 3.18618 | down | 3.17659 | down | 737.70166   | 2433.79830   | 498.70430   | 1396.91500   | Detected    | Detected | Detected    | Detected    |
| 5526 | A_33_P3325723 | CHN1         | Hs.654534 | chimerin (chimaerin) 1                                                                                                                 | Homo sapiens chimerin (chimaerin) 1 (CHN1), transcript variant 1, mRNA [NM_001822]                                                                                                                | 3.18408 | down | 3.28371 | down | 778.31165   | 2566.08400   | 529.56190   | 1533.36880   | Detected    | Detected | Detected    | Detected    |
| 5527 | A_33_P3409746 | C11orf91     |           | chromosome 11 open reading frame 91                                                                                                    | Homo sapiens chromosome 11 open reading frame 91 (C11orf91), mRNA [NM_001166692]                                                                                                                  | 3.18392 | down | 4.07648 | down | 39.21393    | 129.28110    | 38.54809    | 138.56503    | Detected    | Detected | Detected    | Detected    |
| 5528 | A_23_P380208  | VEPH1        | Hs.658046 | ventricular zone expressed PH domain homolog 1 (zebrafish)                                                                             | Homo sapiens ventricular zone expressed PH domain homolog 1 (zebrafish) (VEPH1), mRNA [NM_024621]                                                                                                 | 3.18194 | down | 3.54381 | down | 66.67246    | 219.67033    | 50.51992    | 157.86963    | Detected    | Detected | Detected    | Detected    |
| 5529 | A_33_P3380076 | LOC100131673 |           | similar to hCG1995779                                                                                                                  | PREDICTED: Homo sapiens hypothetical LOC100131673 (LOC100131673), mRNA [XM_001723856]                                                                                                             | 3.17730 | down | 1.18403 | down | 5.85481     | 19.26212     | 2.86511     | 2.99137      | Compromised | Detected | Compromised | Compromised |
| 5530 | A_24_P260639  | HIST1H1D     | Hs.136857 | histone cluster 1, H1d                                                                                                                 | Homo sapiens histone cluster 1, H1d (HIST1H1D), mRNA [NM_005320]                                                                                                                                  | 3.17719 | down | 2.77023 | down | 408.88016   | 1345.15490   | 419.31656   | 1024.28980   | Detected    | Detected | Detected    | Detected    |
| 5531 | A_23_P32707   | ESPL1        | Hs.153479 | extra spindle pole bodies homolog 1 (S. cerevisiae)                                                                                    | Homo sapiens extra spindle pole bodies homolog 1 (S. cerevisiae) (ESPL1), mRNA [NM_012291]                                                                                                        | 3.17617 | down | 3.49854 | down | 702.22830   | 2308.48580   | 594.55237   | 1834.17990   | Detected    | Detected | Detected    | Detected    |
| 5532 | A_23_P29303   | RRP7A        | Hs.720380 | ribosomal RNA processing 7 homolog A (S. cerevisiae)                                                                                   | Homo sapiens ribosomal RNA processing 7 homolog A (S. cerevisiae) (RRP7A), mRNA [NM_015703]                                                                                                       | 3.16936 | down | 4.61394 | down | 149.90828   | 491.96094    | 134.40067   | 546.81274    | Detected    | Detected | Detected    | Detected    |
| 5533 | A_23_P48109   | NINJ2        | Hs.656450 | ninjurin 2                                                                                                                             | Homo sapiens ninjurin 2 (NINJ2), mRNA [NM_016533]                                                                                                                                                 | 3.16879 | down | 3.77729 | down | 46.87976    | 153.81956    | 39.25814    | 130.76013    | Detected    | Detected | Detected    | Detected    |
| 5534 | A_32_P192376  | ENPP1        | Hs.527295 | ectonucleotide pyrophosphatase/phosphodiesterase 1                                                                                     | Homo sapiens ectonucleotide pyrophosphatase/phosphodiesterase 1 (ENPP1), mRNA [NM_006208]                                                                                                         | 3.16696 | down | 2.97743 | down | 774.22350   | 2538.88010   | 495.65933   | 1301.34010   | Detected    | Detected | Detected    | Detected    |
| 5535 | A_23_P254842  | HDHD1A       | Hs.185910 | haloacid dehalogenase-like hydrolase domain containing 1A                                                                              | Homo sapiens haloacid dehalogenase-like hydrolase domain containing 1A (HDHD1A), transcript variant 2, mRNA [NM_012080]                                                                           | 3.16554 | down | 3.05578 | down | 787.31340   | 2580.64870   | 677.89980   | 1826.63830   | Detected    | Detected | Detected    | Detected    |
| 5536 | A_33_P3372488 |              |           |                                                                                                                                        | Tectonic-3 Precursor [Source:UniProtKB/Swiss-Prot;Acc:Q6NUS6] [ENST00000371209]                                                                                                                   | 3.16503 | down | 1.55213 | down | 15.31944    | 50.20572     | 7.83487     | 10.72323     | Detected    | Detected | Compromised | Compromised |
| 5537 | A_23_P60227   | CCIN         | Hs.115460 | calicin                                                                                                                                | Homo sapiens calicin (CCIN), mRNA [NM_005893]                                                                                                                                                     | 3.16483 | down | 5.62170 | down | 241.68053   | 791.99884    | 135.92361   | 673.79584    | Detected    | Detected | Detected    | Detected    |
| 5538 | A_23_P350719  | TMPPRS8      | Hs.434388 | transmembrane protease, serine 8 homolog (mouse) pseudogene                                                                            | Homo sapiens transmembrane protease, serine 8 homolog (mouse) pseudogene (TMPPRS8), non-coding RNA [NR_026864]                                                                                    | 3.16359 | down | 1.68976 | down | 10.66677    | 34.94184     | 8.64540     | 12.88179     | Compromised | Detected | Compromised | Compromised |
| 5539 | A_33_P3344127 | HIST1H2AC    | Hs.484950 | histone cluster 1, H2ac                                                                                                                | Homo sapiens histone cluster 1, H2ac (HIST1H2AC), mRNA [NM_003512]                                                                                                                                | 3.16263 | down | 2.72154 | down | 53.07601    | 173.81200    | 58.09112    | 139.40850    | Detected    | Detected | Detected    | Detected    |
| 5540 | A_33_P3363188 | FLN43315     | Hs.632789 | similar to Asparagine synthetase [glutamine-hydrolyzing] (Glutamine-dependent asparagine synthetase) (TS11 cell cycle control protein) | Homo sapiens similar to Asparagine synthetase [glutamine-hydrolyzing] (Glutamine-dependent asparagine synthetase) (TS11 cell cycle control protein), mRNA (cDNA clone IMAGE:30345211), [BC057848] | 3.16255 | down | 3.09988 | down | 58.08824    | 190.22081    | 40.36947    | 110.34768    | Detected    | Detected | Detected    | Detected    |
| 5541 | A_33_P3311974 |              |           |                                                                                                                                        | Prospero homeobox protein 2 (Homeobox prospero-like protein PROX2/PROX-2) [Source:UniProtKB/Swiss-Prot;Acc:Q3B8N5] [ENST00000238583]                                                              | 3.16219 | down | 2.03507 | down | 5.13720     | 16.82082     | 4.75180     | 8.52713      | Compromised | Detected | Compromised | Compromised |
| 5542 | A_23_P121222  | RAD18        | Hs.375684 | RAD18 homolog (S. cerevisiae)                                                                                                          | Homo sapiens RAD18 homolog (S. cerevisiae) (RAD18), mRNA [NM_020165]                                                                                                                              | 3.15445 | down | 2.80363 | down | 264.78900   | 864.88180    | 207.24443   | 512.35315    | Detected    | Detected | Detected    | Detected    |
| 5543 | A_23_P14193   | RFC3         | Hs.115474 | replication factor C (activator 1) 3, 38kDa                                                                                            | Homo sapiens replication factor C (activator 1) 3, 38kDa (RFC3), transcript variant 1, mRNA [NM_002915]                                                                                           | 3.15353 | down | 3.02196 | down | 162.44206   | 530.43005    | 158.75660   | 423.04422    | Detected    | Detected | Detected    | Detected    |
| 5544 | A_23_P162547  | MYL2         | Hs.75535  | myosin, light chain 2, regulatory, cardiac, slow                                                                                       | Homo sapiens myosin, light chain 2, regulatory, cardiac, slow (MYL2), mRNA [NM_000432]                                                                                                            | 3.15344 | down | 2.83932 | down | 73.80911    | 241.00575    | 36.16277    | 90.54007     | Detected    | Detected | Detected    | Detected    |
| 5545 | A_23_P121533  | SPON2        | Hs.720064 | spondin 2, extracellular matrix protein                                                                                                | Homo sapiens spondin 2, extracellular matrix protein (SPON2), transcript variant 1, mRNA [NM_012445]                                                                                              | 3.15286 | down | 3.29741 | down | 57357.42000 | 187252.52000 | 38992.57400 | 113375.89000 | Detected    | Detected | Detected    | Detected    |
| 5546 | A_33_P3361202 | C1orf96      | Hs.585011 | chromosome 1 open reading frame 96                                                                                                     | Homo sapiens chromosome 1 open reading frame 96 (C1orf96), mRNA [NM_149237]                                                                                                                       | 3.15266 | down | 2.90616 | down | 174.04498   | 568.16174    | 139.46707   | 357.40210    | Detected    | Detected | Detected    | Detected    |
| 5547 | A_23_P436281  | HIST2H4B     | Hs.706635 | histone cluster 2, H4b                                                                                                                 | Homo sapiens histone cluster 2, H4b (HIST2H4B), mRNA [NM_001034077]                                                                                                                               | 3.14919 | down | 2.74034 | down | 113.46137   | 369.98145    | 110.01450   | 265.83990    | Detected    | Detected | Detected    | Detected    |

|      |               |           |           |                                                                                                                                       |                                                                                                                                                                               |         |      |         |      |            |             |            |             |             |             |             |             |
|------|---------------|-----------|-----------|---------------------------------------------------------------------------------------------------------------------------------------|-------------------------------------------------------------------------------------------------------------------------------------------------------------------------------|---------|------|---------|------|------------|-------------|------------|-------------|-------------|-------------|-------------|-------------|
| 5548 | A_23_P256724  | TNFRSF10C | Hs.655801 | tumor necrosis factor receptor superfamily, member 10c, decoy without an intracellular domain                                         | Homo sapiens tumor necrosis factor receptor superfamily, member 10c, decoy without an intracellular domain (TNFRSF10C), mRNA [NM_003841]                                      | 3.14780 | down | 3.39738 | down | 35.48579   | 115.66289   | 26.96824   | 80.79075    | Detected    | Detected    | Detected    | Detected    |
| 5549 | A_23_P219197  | RGS3      | Hs.494875 | regulator of G-protein signaling 3                                                                                                    | Homo sapiens regulator of G-protein signaling 3 (RGS3), transcript variant 4, mRNA [NM_134427]                                                                                | 3.14681 | down | 3.18681 | down | 4962.77340 | 16170.66600 | 4110.55220 | 11551.05600 | Detected    | Detected    | Detected    | Detected    |
| 5550 | A_33_P3504659 | CASP10    | Hs.5353   | caspace 10, apoptosis-related cysteine peptidase                                                                                      | Homo sapiens caspase 10, apoptosis-related cysteine peptidase (CASP10), transcript variant D, mRNA [NM_032977]                                                                | 3.14676 | down | 3.25119 | down | 65.71383   | 214.11809   | 45.20422   | 129.59439   | Detected    | Detected    | Detected    | Detected    |
| 5551 | A_24_P323114  | ANXA2P3   | Hs.591361 | annexin A2 pseudogene 3                                                                                                               | Homo sapiens annexin A2 pseudogene 3 (ANXA2P3), non-coding RNA [NR_001446]                                                                                                    | 3.14554 | down | 2.95864 | down | 5581.56900 | 18179.59000 | 1035.35520 | 2701.13900  | Detected    | Detected    | Detected    | Detected    |
| 5552 | A_33_P3373200 |           |           |                                                                                                                                       |                                                                                                                                                                               | 3.14504 | down | 1.19699 | down | 10.26729   | 33.43602    | 2.78669    | 2.92233     | Compromised | Detected    | Compromised | Compromised |
| 5553 | A_23_P141965  | HAUS8     | Hs.404088 | HAUS augmin-like complex, subunit 8                                                                                                   | Homo sapiens HAUS augmin-like complex, subunit 8 (HAUS8), transcript variant 1, mRNA [NM_033417]                                                                              | 3.14356 | down | 3.11810 | down | 1395.77420 | 4543.28470  | 1386.16280 | 3811.26760  | Detected    | Detected    | Detected    | Detected    |
| 5554 | A_23_P259189  | CLIC4     | Hs.440544 | chloride intracellular channel 4                                                                                                      | Homo sapiens chloride intracellular channel 4 (CLIC4), nuclear gene encoding mitochondrial protein, mRNA [NM_013943]                                                          | 3.14298 | down | 3.13225 | down | 1334.81870 | 4344.06600  | 1020.13410 | 2817.59770  | Detected    | Detected    | Detected    | Detected    |
| 5555 | A_23_P115105  | C1orf144  | Hs.252967 | chromosome 1 open reading frame 144                                                                                                   | Homo sapiens chromosome 1 open reading frame 144 (C1orf144), transcript variant 2, mRNA [NM_015609]                                                                           | 3.14053 | down | 3.17001 | down | 3118.76680 | 10141.88900 | 2434.52700 | 6805.19600  | Detected    | Detected    | Detected    | Detected    |
| 5556 | A_23_P62932   | ATP1B1    | Hs.291196 | ATPase, Na <sup>+</sup> /K <sup>+</sup> transporting, beta 1 polypeptide                                                              | Homo sapiens ATPase, Na <sup>+</sup> /K <sup>+</sup> transporting, beta 1 polypeptide (ATP1B1), transcript variant 1, mRNA [NM_001677]                                        | 3.13931 | down | 3.62003 | down | 1546.11900 | 5025.85250  | 1176.35170 | 3755.04320  | Detected    | Detected    | Detected    | Detected    |
| 5557 | A_24_P46911   | KCNS2     | Hs.388045 | potassium voltage-gated channel, delayed-rectifier, subfamily S, member 2                                                             | Homo sapiens potassium voltage-gated channel, delayed-rectifier, subfamily S, member 2 (KCNS2), mRNA [NM_020697]                                                              | 3.13922 | down | 2.55367 | down | 29.73829   | 96.66528    | 32.70969   | 73.65569    | Detected    | Detected    | Detected    | Detected    |
| 5558 | A_23_P86653   | SRGN      | Hs.1908   | serglycin                                                                                                                             | Homo sapiens serglycin (SRGN), mRNA [NM_002727]                                                                                                                               | 3.13800 | down | 3.14695 | down | 907.57700  | 2948.96200  | 689.72125  | 1913.94450  | Detected    | Detected    | Detected    | Detected    |
| 5559 | A_24_P244706  | SSTR1     | Hs.248160 | somatostatin receptor 1                                                                                                               | Homo sapiens somatostatin receptor 1 (SSTR1), mRNA [NM_001049]                                                                                                                | 3.13713 | down | 3.54727 | down | 48.67087   | 158.10095   | 28.06864   | 87.79719    | Detected    | Detected    | Detected    | Detected    |
| 5560 | A_23_P117494  | MTHFD1    | Hs.652308 | methylenetetrahydrofolate dehydrogenase (NADP+ dependent) 1, methyltetrahydrofolate cyclohydrolase, formyltetrahydrofolate synthetase | Homo sapiens methylenetetrahydrofolate dehydrogenase (NADP+ dependent) 1, methyltetrahydrofolate cyclohydrolase, formyltetrahydrofolate synthetase (MTHFD1), mRNA [NM_005956] | 3.13679 | down | 3.21752 | down | 3109.31840 | 10099.13300 | 2295.80800 | 6513.62400  | Detected    | Detected    | Detected    | Detected    |
| 5561 | A_23_P35148   | TAF13     | Hs.632426 | TAF13 RNA polymerase II, TATA box binding protein (TBP)-associated factor, 18kDa                                                      | Homo sapiens TAF13 RNA polymerase II, TATA box binding protein (TBP)-associated factor, 18kDa (TAF13), mRNA [NM_005645]                                                       | 3.13553 | down | 3.23166 | down | 36.37207   | 118.08963   | 40.37082   | 115.04269   | Detected    | Detected    | Detected    | Detected    |
| 5562 | A_23_P17663   | MX1       | Hs.517307 | myxovirus (influenza virus) resistance 1, interferon-inducible protein p78 (mouse)                                                    | Homo sapiens myxovirus (influenza virus) resistance 1, interferon-inducible protein p78 (mouse) (MX1), transcript variant 2, mRNA [NM_002492]                                 | 3.13546 | down | 2.66173 | down | 196.99387  | 639.56946   | 226.36647  | 531.30280   | Detected    | Detected    | Detected    | Detected    |
| 5563 | A_23_P391275  | RCAN3     | Hs.656799 | RCAN family member 3                                                                                                                  | Homo sapiens RCAN family member 3 (RCAN3), mRNA [NM_013441]                                                                                                                   | 3.13385 | down | 2.97680 | down | 142.12642  | 461.19640   | 111.41219  | 292.44730   | Detected    | Detected    | Detected    | Detected    |
| 5564 | A_23_P408930  | OR7E5P    | Hs.350816 | olfactory receptor, family 7, subfamily E, member 5 pseudogene                                                                        | Homo sapiens olfactory receptor, family 7, subfamily E, member 5 pseudogene (OR7E5P), non-coding RNA [NR_027688]                                                              | 3.12966 | down | 2.09140 | down | 49.24318   | 159.57928   | 18.91004   | 34.87352    | Detected    | Detected    | Detected    | Detected    |
| 5565 | A_33_P3298960 | KDEL2     | Hs.83286  | KDEL (Lys-Asp-Glu-Leu) containing 2                                                                                                   | Homo sapiens KDEL (Lys-Asp-Glu-Leu) containing 2 (KDEL2), mRNA [NM_153705]                                                                                                    | 3.12880 | down | 3.94384 | down | 30.55508   | 98.99079    | 18.51525   | 64.38940    | Detected    | Detected    | Detected    | Detected    |
| 5566 | A_23_P76761   | VRK1      | Hs.422662 | vaccinia related kinase 1                                                                                                             | Homo sapiens vaccinia related kinase 1 (VRK1), mRNA [NM_003384]                                                                                                               | 3.12691 | down | 3.17367 | down | 1575.39320 | 5100.78470  | 983.58307  | 2752.56760  | Detected    | Detected    | Detected    | Detected    |
| 5567 | A_33_P3232828 | SFRS3     | Hs.405144 | splicing factor, arginine/serine-rich 3                                                                                               | Homo sapiens splicing factor, arginine/serine-rich 3 (SFRS3), mRNA [NM_003017]                                                                                                | 3.12679 | down | 3.31513 | down | 2374.86180 | 7688.99270  | 2459.61600 | 7190.06700  | Detected    | Detected    | Detected    | Detected    |
| 5568 | A_33_P3406866 | NFASC     | Hs.13349  | neurofascin homolog (chicken)                                                                                                         | Homo sapiens neurofascin homolog (chicken) (NFASC), transcript variant 1, mRNA [NM_001005388]                                                                                 | 3.12575 | down | 3.30579 | down | 2612.42240 | 8455.32600  | 2118.84840 | 6176.46880  | Detected    | Detected    | Detected    | Detected    |
| 5569 | A_23_P209904  | GPC1      | Hs.328232 | glypican 1                                                                                                                            | Homo sapiens glypican 1 (GPC1), mRNA [NM_002081]                                                                                                                              | 3.12236 | down | 3.77655 | down | 9630.09700 | 31134.83200 | 9392.59200 | 31278.53100 | Detected    | Detected    | Detected    | Detected    |
| 5570 | A_33_P3291939 | CNGA3     | Hs.234785 | cyclic nucleotide gated channel alpha 3                                                                                               | Homo sapiens cyclic nucleotide gated channel alpha 3 (CNGA3), transcript variant 1, mRNA [NM_001298]                                                                          | 3.12142 | down | 5.35563 | down | 4.62787    | 14.95775    | 3.39421    | 16.02931    | Compromised | Compromised | Compromised | Detected    |
| 5571 | A_23_P79360   | NOSTRIN   | Hs.189780 | nitric oxide synthase trafficker                                                                                                      | Homo sapiens nitric oxide synthase trafficker (NOSTRN), transcript variant 1, mRNA [NM_052946]                                                                                | 3.12081 | down | 8.33575 | down | 7.58485    | 24.51020    | 2.38415    | 17.52440    | Compromised | Detected    | Compromised | Detected    |
| 5572 | A_33_P3384845 | POFUT1    | Hs.472409 | protein O-fucosyltransferase 1                                                                                                        | Homo sapiens protein O-fucosyltransferase 1 (POFUT1), transcript variant 2, mRNA [NM_172236]                                                                                  | 3.12055 | down | 4.64619 | down | 23.18521   | 74.91607    | 9.41066    | 38.55512    | Detected    | Detected    | Compromised | Detected    |
| 5573 | A_24_P269779  | CHST3     | Hs.158304 | carbohydrate (chondroitin 6) sulfotransferase 3                                                                                       | Homo sapiens carbohydrate (chondroitin 6) sulfotransferase 3 (CHST3), mRNA [NM_004273]                                                                                        | 3.11906 | down | 3.47612 | down | 568.12160  | 1834.84200  | 347.33447  | 1064.65310  | Detected    | Detected    | Detected    | Detected    |
| 5574 | A_23_P136355  | HHAT      | Hs.58650  | hedgehog acyltransferase                                                                                                              | Homo sapiens hedgehog acyltransferase (HHAT), transcript variant 1, mRNA [NM_018194]                                                                                          | 3.11707 | down | 3.84842 | down | 29.14988   | 94.08417    | 23.16803   | 78.62073    | Detected    | Detected    | Detected    | Detected    |
| 5575 | A_32_P46571   | RHBDL2    | Hs.524626 | rhomboid, veinlet-like 2 (Drosophila)                                                                                                 | Homo sapiens rhomboid, veinlet-like 2 (Drosophila) (RHBDL2), mRNA [NM_017821]                                                                                                 | 3.11673 | down | 2.81277 | down | 90.38510   | 291.69470   | 63.13185   | 156.58409   | Detected    | Detected    | Detected    | Detected    |

|      |               |            |           |                                                                         |                                                                                                                                                                                                                      |         |      |         |      |            |             |            |             |             |          |             |             |
|------|---------------|------------|-----------|-------------------------------------------------------------------------|----------------------------------------------------------------------------------------------------------------------------------------------------------------------------------------------------------------------|---------|------|---------|------|------------|-------------|------------|-------------|-------------|----------|-------------|-------------|
| 5576 | A_24_P231829  | BHMT2      | Hs.114172 | betaine-homocysteine methyltransferase 2                                | Homo sapiens betaine-homocysteine methyltransferase 2 (BHMT2), mRNA [NM_017614]                                                                                                                                      | 3.11606 | down | 3.39679 | down | 87.09492   | 281.01630   | 62.57184   | 187.41867   | Detected    | Detected | Detected    | Detected    |
| 5577 | A_33_P3283480 | CTSC       | Hs.128065 | cathepsin C                                                             | Homo sapiens cathepsin C (CTSC), transcript variant 2, mRNA [NM_148170]                                                                                                                                              | 3.11383 | down | 3.33855 | down | 948.40250  | 3057.88330  | 685.53040  | 2018.13300  | Detected    | Detected | Detected    | Detected    |
| 5578 | A_23_P125233  | CNN1       | Hs.465929 | calponin 1, basic, smooth muscle                                        | Homo sapiens calponin 1, basic, smooth muscle (CNN1), mRNA [NM_001299]                                                                                                                                               | 3.11352 | down | 3.35658 | down | 2292.59450 | 7391.14700  | 2463.25420 | 7290.74270  | Detected    | Detected | Detected    | Detected    |
| 5579 | A_33_P3331188 | ARHGAP23   | Hs.374446 | Rho GTPase activating protein 23                                        | Homo sapiens Rho GTPase activating protein 23 (ARHGAP23), mRNA [NM_020876]                                                                                                                                           | 3.11247 | down | 3.31748 | down | 131.22339  | 422.91113   | 122.70849  | 358.96243   | Detected    | Detected | Detected    | Detected    |
| 5580 | A_23_P8571    | SRCRB4D    | Hs.567684 | scavenger receptor cysteine rich domain containing, group B (4 domains) | Homo sapiens scavenger receptor cysteine rich domain containing, group B (4 domains) (SRCRB4D), mRNA [NM_080744]                                                                                                     | 3.11070 | down | 3.08539 | down | 202.05933  | 650.83307   | 166.77989  | 453.75342   | Detected    | Detected | Detected    | Detected    |
| 5581 | A_33_P3339436 | LOC145845  | Hs.302693 | hypothetical LOC145845                                                  | Homo sapiens hypothetical LOC145845 (LOC145845), non-coding RNA [NR_024264]                                                                                                                                          | 3.11048 | down | 1.37076 | down | 434.93990  | 1400.84330  | 71.79256   | 86.77764    | Detected    | Detected | Detected    | Detected    |
| 5582 | A_23_P95764   | PRPS1      | Hs.56     | phosphoribosyl pyrophosphate synthetase 1                               | Homo sapiens phosphoribosyl pyrophosphate synthetase 1 (PRPS1), mRNA [NM_002764]                                                                                                                                     | 3.10903 | down | 3.63238 | down | 3357.62060 | 10809.11300 | 5782.04500 | 18519.89500 | Detected    | Detected | Detected    | Detected    |
| 5583 | A_32_P193646  | RBMX       | Hs.380118 | RNA binding motif protein, X-linked                                     | Homo sapiens RNA binding motif protein, X-linked (RBMX), transcript variant 1, mRNA [NM_002139]                                                                                                                      | 3.10660 | down | 2.72422 | down | 767.20660  | 2467.91720  | 511.97495  | 1229.86240  | Detected    | Detected | Detected    | Detected    |
| 5584 | A_23_P209778  | POLR2D     | Hs.554831 | polymerase (RNA) II (DNA directed) polypeptide D                        | Homo sapiens polymerase (RNA) II (DNA directed) polypeptide D (POLR2D), mRNA [NM_004805]                                                                                                                             | 3.10621 | down | 3.34165 | down | 1183.40390 | 3806.24490  | 1018.74790 | 3001.87700  | Detected    | Detected | Detected    | Detected    |
| 5585 | A_33_P3332126 |            | Hs.709612 |                                                                         | Selenocysteine lyase (hSCL)/EO 4.4.1.16 [Source:UniProtKB/Swiss-Prot;Acc:Q98115] [ENST0000409736]                                                                                                                    | 3.10605 | down | 4.00958 | down | 218.07831  | 701.38116   | 162.59698  | 574.87964   | Detected    | Detected | Detected    | Detected    |
| 5586 | A_33_P3287690 | CNOT2      | Hs.133350 | CCR4-NOT transcription complex, subunit 2                               | Homo sapiens cDNA FLJ26456 fis. clone KDN03862, [AKI29986]                                                                                                                                                           | 3.10603 | down | 1.18513 | down | 5.35378    | 17.21865    | 2.53948    | 2.65384     | Compromised | Detected | Compromised | Compromised |
| 5587 | A_23_P25293   | NCAPD2     | Hs.5719   | non-SMC condensin I complex, subunit D2                                 | Homo sapiens non-SMC condensin I complex, subunit D2 (NCAPD2), mRNA [NM_014885]                                                                                                                                      | 3.10084 | down | 3.18637 | down | 659.44366  | 2117.33470  | 729.57230  | 2049.88940  | Detected    | Detected | Detected    | Detected    |
| 5588 | A_23_P383819  | TBX3       | Hs.714737 | T-box 3                                                                 | Homo sapiens T-box 3 (TBX3), transcript variant 2, mRNA [NM_016569]                                                                                                                                                  | 3.09961 | down | 3.18683 | down | 1834.99980 | 5889.47700  | 854.32250  | 2400.74930  | Detected    | Detected | Detected    | Detected    |
| 5589 | A_23_P141005  | AMFR       | Hs.295137 | autocrine motility factor receptor                                      | Homo sapiens autocrine motility factor receptor (AMFR), mRNA [NM_001144]                                                                                                                                             | 3.09914 | down | 4.03541 | down | 1555.67290 | 4992.20800  | 825.89716  | 2938.86000  | Detected    | Detected | Detected    | Detected    |
| 5590 | A_33_P3260342 | NFASC      | Hs.13349  | neurofascin homolog (chicken)                                           | Homo sapiens neurofascin homolog (chicken) (NFASC), transcript variant 1, mRNA [NM_001005388]                                                                                                                        | 3.09853 | down | 2.73887 | down | 58.91195   | 189.01350   | 61.74173   | 149.11308   | Detected    | Detected | Detected    | Detected    |
| 5591 | A_23_P82523   | ABCB1      | Hs.489033 | ATP-binding cassette, sub-family B (MDR/TAP), member 1                  | Homo sapiens ATP-binding cassette, sub-family B (MDR/TAP), member 1 (ABCB1), mRNA [NM_000927]                                                                                                                        | 3.09646 | down | 2.03929 | down | 6.32705    | 20.28619    | 7.86219    | 14.13803    | Compromised | Detected | Compromised | Detected    |
| 5592 | A_24_P151498  | PRMT2      | Hs.154163 | protein arginine methyltransferase 2                                    | Homo sapiens protein arginine methyltransferase 2 (PRMT2), transcript variant 1, mRNA [NM_206962]                                                                                                                    | 3.09619 | down | 3.29087 | down | 1086.87110 | 3484.48410  | 1271.60610 | 3690.02500  | Detected    | Detected | Detected    | Detected    |
| 5593 | A_33_P3225587 | NAT13      | Hs.596074 | N-acetyltransferase 13 (GCN5-related)                                   | Homo sapiens N-acetyltransferase 13 (GCN5-related) (NAT13), mRNA [NM_025146]                                                                                                                                         | 3.09558 | down | 2.80446 | down | 805.88460  | 2583.14380  | 777.68427  | 1923.17470  | Detected    | Detected | Detected    | Detected    |
| 5594 | A_32_P120043  | FAM28E     | Hs.660142 | family with sequence similarity 26, member E                            | Homo sapiens family with sequence similarity 26, member E (FAM28E), mRNA [NM_153711]                                                                                                                                 | 3.09366 | down | 3.43724 | down | 46.13914   | 147.80028   | 27.43779   | 83.16188    | Detected    | Detected | Detected    | Detected    |
| 5595 | A_33_P3411357 | DGCR11     | Hs.720269 | DiGeorge syndrome critical region gene 11                               | Homo sapiens DiGeorge syndrome critical region gene 11 (DGCR11), non-coding RNA [NR_024157]                                                                                                                          | 3.09317 | down | 3.12435 | down | 108.01168  | 345.94516   | 94.95355   | 261.59910   | Detected    | Detected | Detected    | Detected    |
| 5596 | A_23_P145134  | FGFR1OP    | Hs.487175 | FGFR1 oncogene partner                                                  | Homo sapiens FGFR1 oncogene partner (FGFR1OP), transcript variant 1, mRNA [NM_007045]                                                                                                                                | 3.09269 | down | 3.47278 | down | 485.26736  | 1554.00060  | 359.61270  | 1101.22800  | Detected    | Detected | Detected    | Detected    |
| 5597 | A_23_P99452   | BRCA2      | Hs.34012  | breast cancer 2, early onset                                            | Homo sapiens breast cancer 2, early onset (BRCA2), mRNA [NM_000059]                                                                                                                                                  | 3.08462 | down | 4.04832 | down | 17.06263   | 54.49803    | 8.90761    | 31.79808    | Detected    | Detected | Compromised | Detected    |
| 5598 | A_23_P20823   | WDR34      | Hs.495240 | WD repeat domain 34                                                     | Homo sapiens WD repeat domain 34 (WDR34), mRNA [NM_052844]                                                                                                                                                           | 3.08350 | down | 3.21225 | down | 1397.11730 | 4460.76800  | 1505.87170 | 4265.43000  | Detected    | Detected | Detected    | Detected    |
| 5599 | A_33_P3228300 | RCL1       | Hs.194211 | RNA terminal phosphate cyclase-like 1                                   | Homo sapiens RNA terminal phosphate cyclase-like 1 (RCL1), mRNA [NM_005772]                                                                                                                                          | 3.08294 | down | 2.95784 | down | 924.96460  | 2952.72850  | 880.01800  | 2295.25730  | Detected    | Detected | Detected    | Detected    |
| 5600 | A_33_P3305472 |            | Hs.288215 |                                                                         | small nuclear RNA, C/D box 1C (SNORD1C), non-coding RNA [Source:RefSeq DNA;Acc:NR_004397] [ENST00000375052]                                                                                                          | 3.08009 | down | 4.29798 | down | 39.18271   | 124.96590   | 18.12705   | 68.69997    | Detected    | Detected | Detected    | Detected    |
| 5601 | A_23_P979630  | SLC38A10   | Hs.352240 | solute carrier family 38, member 10                                     | Homo sapiens solute carrier family 38, member 10 (SLC38A10), transcript variant 2, mRNA [NM_138570]                                                                                                                  | 3.07888 | down | 3.86654 | down | 118.41959  | 377.52832   | 117.92558  | 402.06454   | Detected    | Detected | Detected    | Detected    |
| 5602 | A_23_P309381  | HIST2H2AA4 | Hs.706714 | histone cluster 2, H2aa4                                                | Homo sapiens histone cluster 2, H2aa4 (HIST2H2AA4), mRNA [NM_001040874]                                                                                                                                              | 3.07490 | down | 3.01613 | down | 263.22757  | 838.09890   | 294.27090  | 782.64075   | Detected    | Detected | Detected    | Detected    |
| 5603 | A_23_P106761  | CORO1A     | Hs.415067 | coronin, actin binding protein, 1A                                      | Homo sapiens coronin, actin binding protein, 1A (CORO1A), mRNA [NM_007074]                                                                                                                                           | 3.07415 | down | 2.81142 | down | 55.34289   | 176.16493   | 66.37285   | 164.54393   | Detected    | Detected | Detected    | Detected    |
| 5604 | A_24_P168574  |            |           |                                                                         | Guanine nucleotide-binding protein G(s) subunit alpha isoforms XLas (Adenylate cyclase-stimulating G alpha protein)(Extra large alphas protein)(XLalphas) [Source:UniProtKB/Swiss-Prot;Acc:Q5JWF2] [ENST00000371081] | 3.07138 | down | 2.32541 | down | 27.38589   | 87.09503    | 33.84385   | 69.39768    | Detected    | Detected | Detected    | Detected    |
| 5605 | A_32_P215318  | ACACA      | Hs.160556 | acetyl-Coenzyme A carboxylase alpha                                     | Homo sapiens acetyl-Coenzyme A carboxylase alpha (ACACA), transcript variant 2, mRNA [NM_198839]                                                                                                                     | 3.07102 | down | 2.48096 | down | 12.79545   | 40.68845    | 14.75733   | 32.28437    | Detected    | Detected | Detected    | Detected    |

|      |               |              |           |                                                                                                 |                                                                                                                                                                                                                        |         |      |         |      |            |            |            |            |             |          |             |             |
|------|---------------|--------------|-----------|-------------------------------------------------------------------------------------------------|------------------------------------------------------------------------------------------------------------------------------------------------------------------------------------------------------------------------|---------|------|---------|------|------------|------------|------------|------------|-------------|----------|-------------|-------------|
| 5606 | A_33_P3342563 | PITPNM3      | Hs.183983 | PITPNM family member 3                                                                          | Homo sapiens PITPNM family member 3 (PITPNM3), transcript variant 1, mRNA [NM_031220]                                                                                                                                  | 3.06581 | down | 2.77746 | down | 127.91990  | 406.08502  | 94.89368   | 232.40817  | Detected    | Detected | Detected    | Detected    |
| 5607 | A_23_P361381  | DMC1         | Hs.339396 | DMC1 dosage suppressor of mck1 homolog, meiosis-specific homologous recombination (yeast)       | Homo sapiens DMC1 dosage suppressor of mck1 homolog, meiosis-specific homologous recombination (yeast) (DMC1), mRNA [NM_007068]                                                                                        | 3.06563 | down | 2.27493 | down | 20.89205   | 66.31842   | 27.66866   | 55.50360   | Detected    | Detected | Detected    | Detected    |
| 5608 | A_33_P3378880 |              |           |                                                                                                 | Histone H4 [Source:UniProtKB/Swiss-Prot;Acc:P62805] [ENST00000377803]                                                                                                                                                  | 3.06445 | down | 2.78612 | down | 135.36536  | 429.53010  | 82.71588   | 203.21425  | Detected    | Detected | Detected    | Detected    |
| 5609 | A_23_P123228  | SLC26A3      | Hs.1650   | solute carrier family 26, member 3                                                              | Homo sapiens solute carrier family 26, member 3 (SLC26A3), mRNA [NM_000111]                                                                                                                                            | 3.06307 | down | 1.40312 | down | 5.49373    | 17.42438   | 3.16996    | 3.92206    | Compromised | Detected | Compromised | Compromised |
| 5610 | A_24_P71973   | KDR          | Hs.479756 | kinase insert domain receptor (a type III receptor tyrosine kinase)                             | Homo sapiens kinase insert domain receptor (a type III receptor tyrosine kinase) (KDR), mRNA [NM_002253]                                                                                                               | 3.06144 | down | 3.43667 | down | 140.01378  | 443.84348  | 116.16223  | 352.02094  | Detected    | Detected | Detected    | Detected    |
| 5611 | A_33_P3382758 |              | Hs.679193 |                                                                                                 | BX404796 Homo sapiens FETAL LIVER Homo sapiens cDNA clone CS00M011Y011 5'-PRIME, mRNA sequence [BX404796]                                                                                                              | 3.06136 | down | 1.85589 | down | 9.23669    | 29.27957   | 8.40235    | 13.75051   | Compromised | Detected | Compromised | Compromised |
| 5612 | A_33_P3415678 |              |           |                                                                                                 | MKL/myocardin-like protein 1 (Myocardin-related transcription factor A)(MRTF-A)(Megakaryoblastic leukemia 1 protein)(Megakaryocytic acute leukemia protein) [Source:UniProtKB/Swiss-Prot;Acc:Q969V6] [ENST00000402630] | 3.06004 | down | 2.89190 | down | 57.61629   | 182.55990  | 47.87204   | 122.07609  | Detected    | Detected | Detected    | Detected    |
| 5613 | A_24_P308029  | HSPB6        | Hs.534538 | heat shock protein, alpha-crystallin-related, B6                                                | Homo sapiens heat shock protein, alpha-crystallin-related, B6 (HSPB6), mRNA [NM_144617]                                                                                                                                | 3.05943 | down | 4.67834 | down | 158.79968  | 503.06326  | 99.90445   | 412.13730  | Detected    | Detected | Detected    | Detected    |
| 5614 | A_24_P383523  | SAMD4A       | Hs.98259  | sterile alpha motif domain containing 4A                                                        | Homo sapiens sterile alpha motif domain containing 4A (SAMD4A), transcript variant 1, mRNA [NM_015589]                                                                                                                 | 3.05929 | down | 3.23846 | down | 443.15744  | 1403.81980 | 512.88617  | 1464.62200 | Detected    | Detected | Detected    | Detected    |
| 5615 | A_23_P140373  | FLVCR2       | Hs.509966 | feline leukemia virus subgroup C cellular receptor family, member 2                             | Homo sapiens feline leukemia virus subgroup C cellular receptor family, member 2 (FLVCR2), mRNA [NM_017791]                                                                                                            | 3.05917 | down | 3.20855 | down | 29.11155   | 92.21517   | 17.89330   | 50.62498   | Detected    | Detected | Detected    | Detected    |
| 5616 | A_33_P3262156 | SLC8A1       | Hs.468274 | solute carrier family 8 (sodium/calcium exchanger), member 1                                    | Homo sapiens solute carrier family 8 (sodium/calcium exchanger), member 1 (SLC8A1), transcript variant A, mRNA [NM_021097]                                                                                             | 3.05755 | down | 5.16874 | down | 61.28171   | 194.01587  | 25.11796   | 114.48138  | Detected    | Detected | Detected    | Detected    |
| 5617 | A_33_P3316522 | DEFB124      | Hs.381373 | defensin, beta 124                                                                              | Homo sapiens defensin, beta 124 (DEFB124), mRNA [NM_001037500]                                                                                                                                                         | 3.05657 | down | 1.76417 | down | 205.09602  | 649.11870  | 58.34496   | 90.76322   | Detected    | Detected | Detected    | Detected    |
| 5618 | A_32_P352358  | LOC650293    | Hs.535167 | seven transmembrane helix receptor                                                              | Homo sapiens seven transmembrane helix receptor (LOC650293), mRNA [NM_001040071]                                                                                                                                       | 3.05616 | down | 2.42163 | down | 24.44747   | 77.36475   | 19.35428   | 41.32858   | Detected    | Detected | Detected    | Detected    |
| 5619 | A_33_P3365924 |              |           |                                                                                                 | Putative uncharacterized protein ENSP00000353084 Fragment [Source:UniProtKB/TrEMBL;Acc:A6NF24] [ENST00000391654]                                                                                                       | 3.05386 | down | 3.08996 | down | 31.33826   | 99.09613   | 37.50080   | 102.17822  | Detected    | Detected | Detected    | Detected    |
| 5620 | A_23_P59045   | HIST1H2AE    | Hs.121017 | histone cluster 1, H2ae                                                                         | Homo sapiens histone cluster 1, H2ae (HIST1H2AE), mRNA [NM_021052]                                                                                                                                                     | 3.05154 | down | 2.59554 | down | 423.33880  | 1337.64180 | 237.01953  | 542.47296  | Detected    | Detected | Detected    | Detected    |
| 5621 | A_23_P100868  | MYO19        | Hs.302051 | myosin XIX                                                                                      | Homo sapiens myosin XIX (MYO19), transcript variant 3, mRNA [NM_001033580]                                                                                                                                             | 3.05125 | down | 3.26739 | down | 907.86860  | 2868.36600 | 831.71230  | 2396.28930 | Detected    | Detected | Detected    | Detected    |
| 5622 | A_33_P3317073 | MOBK1A       | Hs.700445 | MOB1, Mps One Binder kinase activator-like 1A (yeast)                                           | Homo sapiens MOB1, Mps One Binder kinase activator-like 1A (yeast) (MOBK1A), mRNA [NM_173468]                                                                                                                          | 3.05030 | down | 1.13996 | down | 12.22344   | 38.60724   | 21.09019   | 21.19990   | Compromised | Detected | Detected    | Detected    |
| 5623 | A_33_P3411885 | LOC100128851 | Hs.679912 | hypothetical protein LOC100128851                                                               | Homo sapiens cDNA FLJ45515 fis, clone BRTHA2022914, [AK127423]                                                                                                                                                         | 3.05021 | down | 3.51950 | down | 1695.57520 | 5355.24850 | 1120.40200 | 3477.12800 | Detected    | Detected | Detected    | Detected    |
| 5624 | A_24_P3339944 | PDGFB        | Hs.1976   | platelet-derived growth factor beta polypeptide (simian sarcoma viral (v-sis) oncogene homolog) | Homo sapiens platelet-derived growth factor beta polypeptide (simian sarcoma viral (v-sis) oncogene homolog) (PDGFB), transcript variant 1, mRNA [NM_002606]                                                           | 3.04940 | down | 2.40879 | down | 6.85375    | 21.64097   | 7.13727    | 15.15994   | Compromised | Detected | Compromised | Detected    |
| 5625 | A_23_P414308  | FLCN         | Hs.513975 | folliculin                                                                                      | Homo sapiens folliculin (FLCN), transcript variant 2, mRNA [NM_144606]                                                                                                                                                 | 3.04896 | down | 3.12549 | down | 461.19030  | 1456.01120 | 451.75537  | 1245.05180 | Detected    | Detected | Detected    | Detected    |
| 5626 | A_23_P25913   | DNAL1        | Hs.525445 | dynein, axonemal, light chain 1                                                                 | Homo sapiens dynein, axonemal, light chain 1 (DNAL1), mRNA [NM_031427]                                                                                                                                                 | 3.04846 | down | 2.77518 | down | 242.22432  | 764.59410  | 195.18584  | 477.64487  | Detected    | Detected | Detected    | Detected    |
| 5627 | A_23_P91317   | RAD21L1      | Hs.713451 | RAD21-like 1 (S. pombe)                                                                         | Homo sapiens RAD21-like 1 (S. pombe) (RAD21L1), mRNA [NM_001136566]                                                                                                                                                    | 3.04596 | down | 1.18368 | down | 6.79083    | 21.41805   | 2.88247    | 3.00859    | Compromised | Detected | Compromised | Compromised |
| 5628 | A_33_P3253857 |              |           |                                                                                                 |                                                                                                                                                                                                                        | 3.04576 | down | 2.27828 | down | 180.08672  | 567.94995  | 81.67855   | 164.08974  | Detected    | Detected | Detected    | Detected    |
| 5629 | A_33_P3289025 | FAM176A      | Hs.302346 | family with sequence similarity 176, member A                                                   | Homo sapiens family with sequence similarity 176, member A (FAM176A), transcript variant 1, mRNA [NM_001135032]                                                                                                        | 3.04445 | down | 2.84429 | down | 284.20447  | 895.92834  | 429.49830  | 1077.21010 | Detected    | Detected | Detected    | Detected    |
| 5630 | A_33_P3333030 | SUFU         | Hs.404089 | suppressor of fused homolog (Drosophila)                                                        | Homo sapiens suppressor of fused homolog (Drosophila) (SUFU), mRNA [NM_016169]                                                                                                                                         | 3.04428 | down | 2.72172 | down | 24.32019   | 76.66287   | 29.24629   | 70.19083   | Detected    | Detected | Detected    | Detected    |
| 5631 | A_23_P215525  | OSBPL3       | Hs.520259 | oxysterol binding protein-like 3                                                                | Homo sapiens oxysterol binding protein-like 3 (OSBPL3), transcript variant 1, mRNA [NM_015550]                                                                                                                         | 3.04349 | down | 3.30642 | down | 860.44464  | 2711.61180 | 657.90845  | 1918.17610 | Detected    | Detected | Detected    | Detected    |
| 5632 | A_23_P69810   | AGPAT9       | Hs.99196  | 1-acylglycerol-3-phosphate O-acyltransferase 9                                                  | Homo sapiens 1-acylglycerol-3-phosphate O-acyltransferase 9 (AGPAT9), mRNA [NM_032717]                                                                                                                                 | 3.04254 | down | 3.06132 | down | 363.46304  | 1145.06360 | 275.58212  | 743.91736  | Detected    | Detected | Detected    | Detected    |

|      |               |              |           |                                                                    |                                                                                                                                                                                                                     |         |      |          |      |             |             |             |             |             |          |             |             |
|------|---------------|--------------|-----------|--------------------------------------------------------------------|---------------------------------------------------------------------------------------------------------------------------------------------------------------------------------------------------------------------|---------|------|----------|------|-------------|-------------|-------------|-------------|-------------|----------|-------------|-------------|
| 5633 | A_33_P327568  | LOC100292021 |           | similar to thioredoxin peroxidase                                  | Peroxioredoxin-4 (EC 1.11.1.15)(Prx-IV)(Thioredoxin peroxidase A0372)(Thioredoxin-dependent peroxide reductase A0372)(Antioxidant enzyme AOE372(AOE37-2) [Source:UniProtKB/Swiss-Prot;Acc:Q13162] [ENST00000379331] | 3.04184 | down | 3.71843  | down | 12.50706    | 39.39356    | 3.35681     | 11.00656    | Compromised | Detected | Compromised | Compromised |
| 5634 | A_33_P3291176 | VMAC         | Hs.620821 | vimentin-type intermediate filament associated coiled-coil protein | Homo sapiens vimentin-type intermediate filament associated coiled-coil protein (VMAC), mRNA [NM_001017921]                                                                                                         | 3.04117 | down | 3.20077  | down | 226.97826   | 714.75745   | 215.07227   | 607.02140   | Detected    | Detected | Detected    | Detected    |
| 5635 | A_33_P3290532 | LOC255480    | Hs.720583 | hypothetical protein LOC255480                                     | Homo sapiens cDNA FLJ34447 fis. clone HLJNC0202059 [AK091766]                                                                                                                                                       | 3.04080 | down | 10.12398 | down | 8.08405     | 25.45369    | 2.42988     | 21.69210    | Compromised | Detected | Compromised | Detected    |
| 5636 | A_32_P208403  | GNG2         | Hs.708109 | guanine nucleotide binding protein (G protein), gamma 2            | Homo sapiens guanine nucleotide binding protein (G protein), gamma 2 (GNG2), mRNA [NM_053064]                                                                                                                       | 3.04060 | down | 2.66425  | down | 716.55600   | 2256.01760  | 395.25250   | 928.56990   | Detected    | Detected | Detected    | Detected    |
| 5637 | A_24_P671164  | PRLR         | Hs.368587 | prolactin receptor                                                 | Homo sapiens prolactin receptor (PRLR), mRNA [NM_000949]                                                                                                                                                            | 3.03957 | down | 2.86854  | down | 7.58914     | 23.88566    | 3.55654     | 8.99610     | Compromised | Detected | Compromised | Compromised |
| 5638 | A_33_P3253175 |              |           |                                                                    | WD repeat-containing protein 37 [Source:UniProtKB/Swiss-Prot;Acc:Q9Y2I8] [ENST00000381329]                                                                                                                          | 3.03792 | down | 3.16379  | down | 32.21724    | 101.34390   | 24.57428    | 68.55726    | Detected    | Detected | Detected    | Detected    |
| 5639 | A_33_P3295203 | HAS1         | Hs.57697  | hyaluronan synthase 1                                              | Homo sapiens hyaluronan synthase 1 (HAS1), mRNA [NM_001523]                                                                                                                                                         | 3.03548 | down | 3.36715  | down | 436.97534   | 1373.46640  | 392.35413   | 1164.94850  | Detected    | Detected | Detected    | Detected    |
| 5640 | A_23_P136232  | IMPAD1       | Hs.438689 | inositol monophosphatase domain containing 1                       | Homo sapiens inositol monophosphatase domain containing 1 (IMPAD1), mRNA [NM_017813]                                                                                                                                | 3.03134 | down | 3.11322  | down | 757.46870   | 2377.56670  | 457.53430   | 1296.02550  | Detected    | Detected | Detected    | Detected    |
| 5641 | A_23_P78664   | DDX39        | Hs.311609 | DEAD (Asp-Glu-Ala-Asp) box polypeptide 39                          | Homo sapiens DEAD (Asp-Glu-Ala-Asp) box polypeptide 39 (DDX39), mRNA [NM_005804]                                                                                                                                    | 3.02939 | down | 3.06956  | down | 9388.38300  | 29449.62300 | 9159.12800  | 24791.05900 | Detected    | Detected | Detected    | Detected    |
| 5642 | A_23_P90470   |              |           |                                                                    |                                                                                                                                                                                                                     | 3.02740 | down | 1.17387  | down | 7.15205     | 22.41985    | 2.47224     | 2.55905     | Compromised | Detected | Compromised | Compromised |
| 5643 | A_33_P3368895 |              |           |                                                                    |                                                                                                                                                                                                                     | 3.02728 | down | 3.09801  | down | 3199.80710  | 10030.20000 | 1203.02150  | 3286.40550  | Detected    | Detected | Detected    | Detected    |
| 5644 | A_23_P38795   | FPR1         | Hs.753    | formyl peptide receptor 1                                          | Homo sapiens formyl peptide receptor 1 (FPR1), mRNA [NM_002029]                                                                                                                                                     | 3.02123 | down | 3.45878  | down | 145.88289   | 456.37500   | 121.58852   | 370.83575   | Detected    | Detected | Detected    | Detected    |
| 5645 | A_23_P203475  | PRKCDBP      | Hs.434044 | protein kinase C, delta binding protein                            | Homo sapiens protein kinase C, delta binding protein (PRKCDBP), mRNA [NM_145040]                                                                                                                                    | 3.02060 | down | 3.21394  | down | 21024.57200 | 65758.79000 | 25662.04300 | 72726.73000 | Detected    | Detected | Detected    | Detected    |
| 5646 | A_32_P33434   | ZNF812       | Hs.626848 | zinc finger protein 812                                            | Putative zinc finger protein 812 [Source:UniProtKB/Swiss-Prot;Acc:POC7V5] [ENST00000457674]                                                                                                                         | 3.02010 | down | 2.59803  | down | 5.08619     | 15.90546    | 4.79885     | 10.99377    | Compromised | Detected | Compromised | Compromised |
| 5647 | A_33_P3268734 |              | Hs.571561 |                                                                    | CR748640 Soares_NFL_T_GBC_S1 Homo sapiens cDNA clone IMAGE2348699 5', mRNA sequence [CR748640]                                                                                                                      | 3.01392 | down | 1.27358  | down | 8.52902     | 26.61729    | 15.13137    | 16.99302    | Compromised | Detected | Compromised | Detected    |
| 5648 | A_33_P3240787 | LOC100131910 | Hs.689306 | hypothetical protein LOC100131910                                  | Homo sapiens cDNA FLJ27192 fis. clone SYN02553, [AK130702]                                                                                                                                                          | 3.01296 | down | 4.16777  | down | 70.84639    | 221.03299   | 27.68577    | 101.74807   | Detected    | Detected | Detected    | Detected    |
| 5649 | A_23_P152655  | ICAM2        | Hs.431460 | intercellular adhesion molecule 2                                  | Homo sapiens intercellular adhesion molecule 2 (ICAM2), transcript variant 5, mRNA [NM_000873]                                                                                                                      | 3.01219 | down | 3.47897  | down | 108.77898   | 339.28143   | 103.91580   | 318.78473   | Detected    | Detected | Detected    | Detected    |
| 5650 | A_23_P145694  | ASNS         | Hs.489207 | asparagine synthetase                                              | Homo sapiens asparagine synthetase (ASNS), transcript variant 2, mRNA [NM_001673]                                                                                                                                   | 3.01104 | down | 3.09417  | down | 6760.25630  | 21077.17400 | 5756.45500  | 15705.99600 | Detected    | Detected | Detected    | Detected    |
| 5651 | A_23_P422193  | SUV39H1      | Hs.522639 | suppressor of variegation 3-9 homolog 1 (Drosophila)               | Homo sapiens suppressor of variegation 3-9 homolog 1 (SUV39H1), mRNA [NM_003173]                                                                                                                                    | 3.01069 | down | 3.34616  | down | 160.72166   | 501.04050   | 213.61896   | 630.30690   | Detected    | Detected | Detected    | Detected    |
| 5652 | A_23_P132936  | SPCS3        | Hs.42194  | signal peptidase complex subunit 3 homolog (S. cerevisiae)         | Homo sapiens signal peptidase complex subunit 3 homolog (S. cerevisiae) (SPCS3), mRNA [NM_021928]                                                                                                                   | 3.00993 | down | 3.01963  | down | 5045.07570  | 15723.79100 | 4488.09770  | 11950.36700 | Detected    | Detected | Detected    | Detected    |
| 5653 | A_33_P3380913 | LOC100287245 | Hs.650098 | similar to nudix-type motif 15                                     | PREDICTED: Homo sapiens similar to nudix-type motif 15 (LOC100287245), miscRNA [XR_078528]                                                                                                                          | 3.00990 | down | 2.52504  | down | 43.25538    | 134.81104   | 20.64441    | 45.96591    | Detected    | Detected | Detected    | Detected    |
| 5654 | A_33_P3347320 |              |           |                                                                    |                                                                                                                                                                                                                     | 3.00567 | down | 2.98429  | down | 275.64480   | 857.87640   | 200.90433   | 528.68290   | Detected    | Detected | Detected    | Detected    |
| 5655 | A_23_P152984  | THOC4        | Hs.534385 | THO complex 4                                                      | Homo sapiens THO complex 4 (THOC4), mRNA [NM_005782]                                                                                                                                                                | 3.00543 | down | 2.72688  | down | 7230.83350  | 22502.32600 | 5037.84030  | 12113.68500 | Detected    | Detected | Detected    | Detected    |
| 5656 | A_33_P3318581 | PLOD2        | Hs.477866 | procollagen-lysine, 2-oxoglutarate 5-dioxygenase 2                 | Homo sapiens procollagen-lysine, 2-oxoglutarate 5-dioxygenase 2 (PLOD2), transcript variant 1, mRNA [NM_182943]                                                                                                     | 3.00457 | down | 2.84964  | down | 4076.25510  | 12681.68500 | 2914.74760  | 7324.13100  | Detected    | Detected | Detected    | Detected    |
| 5657 | A_24_P327181  | WNK4         | Hs.105448 | WNK lysine deficient protein kinase 4                              | Homo sapiens WNK lysine deficient protein kinase 4 (WNK4), mRNA [NM_032387]                                                                                                                                         | 3.00359 | down | 2.69824  | down | 40.27748    | 125.26679   | 23.55896    | 56.05344    | Detected    | Detected | Detected    | Detected    |
| 5658 | A_23_P101093  | COP22        | Hs.408434 | coatomer protein complex, subunit zeta 2                           | Homo sapiens coatomer protein complex, subunit zeta 2 (COP22), mRNA [NM_016429]                                                                                                                                     | 3.00228 | down | 3.06050  | down | 3416.54250  | 10621.14600 | 2415.69400  | 6519.27150  | Detected    | Detected | Detected    | Detected    |
| 5659 | A_23_P31765   | PKIA         | Hs.433700 | protein kinase (cAMP-dependent, catalytic) inhibitor alpha         | Homo sapiens protein kinase (cAMP-dependent, catalytic) inhibitor alpha (PKIA), transcript variant 6, mRNA [NM_006823]                                                                                              | 3.00176 | down | 3.05832  | down | 788.10803   | 2449.60130  | 560.40656   | 1511.30160  | Detected    | Detected | Detected    | Detected    |
| 5660 | A_23_P127579  | PTS          | Hs.503860 | 6-pyruvoyltetrahydropterin synthase                                | Homo sapiens 6-pyruvoyltetrahydropterin synthase (PTS), mRNA [NM_000317]                                                                                                                                            | 2.99935 | down | 2.99315  | down | 3490.42500  | 10840.21800 | 3003.05790  | 7926.05800  | Detected    | Detected | Detected    | Detected    |
| 5661 | A_24_P51855   | DUSP7        | Hs.591864 | dual specificity phosphatase 7                                     | Homo sapiens dual specificity phosphatase 7 (DUSP7), mRNA [NM_001947]                                                                                                                                               | 2.99839 | down | 3.06222  | down | 29.15657    | 90.52259    | 39.54217    | 106.77337   | Detected    | Detected | Detected    | Detected    |
| 5662 | A_23_P405129  | LTBP2        | Hs.512776 | latent transforming growth factor beta binding protein 2           | Homo sapiens latent transforming growth factor beta binding protein 2 (LTBP2), mRNA [NM_000428]                                                                                                                     | 2.99585 | down | 3.16660  | down | 824.17926   | 2556.67160  | 716.53570   | 2000.76660  | Detected    | Detected | Detected    | Detected    |
| 5663 | A_33_P3409347 | C19orf53     | Hs.231616 | chromosome 19 open reading frame 53                                | Homo sapiens chromosome 19 open reading frame 53 (C19orf53), mRNA [NM_014047]                                                                                                                                       | 2.99080 | down | 2.50513  | down | 27.84484    | 86.23126    | 31.60478    | 69.81508    | Detected    | Detected | Detected    | Detected    |

|      |               |          |           |                                                                                             |                                                                                                                                                                                   |         |      |         |      |             |             |             |             |             |          |             |             |
|------|---------------|----------|-----------|---------------------------------------------------------------------------------------------|-----------------------------------------------------------------------------------------------------------------------------------------------------------------------------------|---------|------|---------|------|-------------|-------------|-------------|-------------|-------------|----------|-------------|-------------|
| 5664 | A_23_P17053   | IL1F9    | Hs.211238 | interleukin 1 family, member 9                                                              | Homo sapiens interleukin 1 family, member 9 (IL1F9), mRNA [NM_019618]                                                                                                             | 2.98881 | down | 1.52568 | down | 9.21036     | 28.50419    | 3.31594     | 4.46103     | Compromised | Detected | Compromised | Compromised |
| 5665 | A_33_P3231367 | ATXN10   | Hs.475125 | ataxin 10                                                                                   | Homo sapiens ataxin 10 (ATXN10), mRNA [NM_013236]                                                                                                                                 | 2.98693 | down | 2.81308 | down | 392.08320   | 1212.65200  | 307.86200   | 763.66570   | Detected    | Detected | Detected    | Detected    |
| 5666 | A_24_P701776  | ARHGEF5L | Hs.534621 | Rho guanine nucleotide exchange factor (GEF) 5-like                                         | Homo sapiens Rho guanine nucleotide exchange factor (GEF) 5-like (ARHGEF5L), mRNA [NM_001003702]                                                                                  | 2.98565 | down | 2.52318 | down | 22.13001    | 68.41540    | 24.18276    | 53.80462    | Detected    | Detected | Detected    | Detected    |
| 5667 | A_23_P336644  | TOR1AIP2 | Hs.655655 | torsin A interacting protein 2                                                              | Homo sapiens torsin A interacting protein 2 (TOR1AIP2), transcript variant 2, mRNA [NM_145034]                                                                                    | 2.98512 | down | 2.90584 | down | 108.62951   | 335.77072   | 81.21252    | 208.09396   | Detected    | Detected | Detected    | Detected    |
| 5668 | A_24_P149704  | DAB2IP   | Hs.522378 | DAB2 interacting protein                                                                    | Homo sapiens DAB2 interacting protein (DAB2IP), transcript variant 2, mRNA [NM_138709]                                                                                            | 2.98190 | down | 2.89504 | down | 25.21265    | 77.84748    | 24.70412    | 63.06511    | Detected    | Detected | Detected    | Detected    |
| 5669 | A_33_P3240333 | PITX1    | Hs.84136  | paired-like homeodomain 1                                                                   | Homo sapiens paired-like homeodomain 1 (PITX1), mRNA [NM_002653]                                                                                                                  | 2.98064 | down | 5.75448 | down | 91.91876    | 283.69223   | 42.20107    | 214.13847   | Detected    | Detected | Detected    | Detected    |
| 5670 | A_33_P3224745 | PLA2G15  | Hs.632199 | phospholipase A2, group XV                                                                  | Homo sapiens phospholipase A2, group XV (PLA2G15), mRNA [NM_012320]                                                                                                               | 2.97887 | down | 3.22974 | down | 8263.29100  | 25488.08000 | 6376.10700  | 18158.88500 | Detected    | Detected | Detected    | Detected    |
| 5671 | A_24_P206047  | SLC25A4  | Hs.246506 | solute carrier family 25 (mitochondrial carrier; adenine nucleotide translocator), member 4 | Homo sapiens solute carrier family 25 (mitochondrial carrier; adenine nucleotide translocator), member 4 (SLC25A4), nuclear gene encoding mitochondrial protein, mRNA [NM_001151] | 2.97694 | down | 3.18034 | down | 590.48170   | 1820.15840  | 651.65790   | 1827.50550  | Detected    | Detected | Detected    | Detected    |
| 5672 | A_33_P3296772 |          |           |                                                                                             |                                                                                                                                                                                   | 2.97687 | down | 2.16678 | down | 28.53963    | 87.97130    | 32.48265    | 62.06285    | Detected    | Detected | Detected    | Detected    |
| 5673 | A_23_P83931   | NET1     | Hs.25155  | neuroepithelial cell transforming 1                                                         | Homo sapiens neuroepithelial cell transforming 1 (NET1), transcript variant 1, mRNA [NM_001047160]                                                                                | 2.97624 | down | 3.17421 | down | 2421.09130  | 7461.27150  | 1569.30760  | 4392.47600  | Detected    | Detected | Detected    | Detected    |
| 5674 | A_23_P160582  | HYI      | Hs.709864 | hydroxypyruvate isomerase homolog (E. coli)                                                 | Homo sapiens hydroxypyruvate isomerase homolog (E. coli) (HYI), mRNA [NM_031207]                                                                                                  | 2.97421 | down | 3.01106 | down | 1149.51610  | 3540.14040  | 1267.09680  | 3364.29440  | Detected    | Detected | Detected    | Detected    |
| 5675 | A_33_P3266958 |          |           |                                                                                             | Zinc finger protein 286A [Source:UniProtKB/Swiss-Prot;Acc:Q9HBT8] [ENST00000395893]                                                                                               | 2.97401 | down | 1.54937 | down | 16.25680    | 50.06231    | 20.36998    | 27.82978    | Detected    | Detected | Detected    | Detected    |
| 5676 | A_24_P772488  | PLXNA4   | Hs.511454 | plexin A4                                                                                   | Homo sapiens plexin A4 (PLXNA4), transcript variant 1, mRNA [NM_020911]                                                                                                           | 2.97264 | down | 5.37088 | down | 6.15336     | 18.94036    | 3.66594     | 17.36184    | Compromised | Detected | Compromised | Detected    |
| 5677 | A_24_P116669  | CANT1    | Hs.8859   | calcium activated nucleotidase 1                                                            | Homo sapiens calcium activated nucleotidase 1 (CANT1), transcript variant 1, mRNA [NM_138793]                                                                                     | 2.97187 | down | 3.23469 | down | 168.07591   | 517.21173   | 168.44190   | 480.44992   | Detected    | Detected | Detected    | Detected    |
| 5678 | A_33_P3336700 | SHROOM3  | Hs.702168 | shroom family member 3                                                                      | Homo sapiens shroom family member 3 (SHROOM3), mRNA [NM_020859]                                                                                                                   | 2.96635 | down | 2.88006 | down | 991.32790   | 3044.89530  | 779.92114   | 1980.69470  | Detected    | Detected | Detected    | Detected    |
| 5679 | A_32_P54475   |          | Hs.722066 |                                                                                             | AL566187 Homo sapiens FETAL BRAIN Homo sapiens cDNA clone CSDDF02ZYK06 3'-PRIME, mRNA sequence [AL566187]                                                                         | 2.96124 | down | 2.06253 | down | 674.73410   | 2068.90040  | 452.71167   | 823.35480   | Detected    | Detected | Detected    | Detected    |
| 5680 | A_33_P3376273 |          |           |                                                                                             | Glycerol kinase (EC 2.7.1.30)(ATP:glycerol 3-phosphotransferase)(Glycerokinase)(GK) [Source:UniProtKB/Swiss-Prot;Acc:P32189] [ENST00000378941]                                    | 2.95450 | down | 4.20594 | down | 19.22633    | 58.81846    | 3.59255     | 13.32391    | Detected    | Detected | Compromised | Compromised |
| 5681 | A_33_P3217153 | GRIA4    | Hs.503743 | glutamate receptor, ionotropic, AMPA 4                                                      | Homo sapiens glutamate receptor, ionotropic, AMPA 4 (GRIA4), transcript variant 2, mRNA [NM_001077243]                                                                            | 2.95283 | down | 1.57190 | down | 303.32556   | 927.42770   | 37.94178    | 52.59076    | Detected    | Detected | Detected    | Detected    |
| 5682 | A_24_P53519   | CHAF1A   | Hs.79018  | chromatin assembly factor 1, subunit A (p150)                                               | Homo sapiens chromatin assembly factor 1, subunit A (p150) (CHAF1A), mRNA [NM_005483]                                                                                             | 2.95266 | down | 2.77340 | down | 1570.52590  | 4801.66360  | 1266.29300  | 3096.79570  | Detected    | Detected | Detected    | Detected    |
| 5683 | A_23_P30913   | HLA-DPA1 | Hs.347270 | major histocompatibility complex, class II, DP alpha 1                                      | Homo sapiens major histocompatibility complex, class II, DP alpha 1 (HLA-DPA1), mRNA [NM_033554]                                                                                  | 2.95165 | down | 2.76049 | down | 184.20305   | 562.98267   | 192.37940   | 468.28452   | Detected    | Detected | Detected    | Detected    |
| 5684 | A_24_P925062  | MXRA7    | Hs.250723 | matrix-remodelling associated 7                                                             | Homo sapiens matrix-remodelling associated 7 (MXRA7), transcript variant 1, mRNA [NM_001008928]                                                                                   | 2.95046 | down | 2.69634 | down | 1202.87120  | 3674.86700  | 899.98550   | 2139.81540  | Detected    | Detected | Detected    | Detected    |
| 5685 | A_33_P3262537 |          |           |                                                                                             |                                                                                                                                                                                   | 2.94960 | down | 3.04715 | down | 25.82156    | 78.86404    | 26.80777    | 72.03114    | Detected    | Detected | Detected    | Detected    |
| 5686 | A_32_P300427  | APCDD1L  | Hs.119286 | adenomatous polyposis coli down-regulated 1-like                                            | Homo sapiens adenomatous polyposis coli down-regulated 1-like (APCDD1L), mRNA [NM_153360]                                                                                         | 2.94873 | down | 2.88250 | down | 1917.96570  | 5856.10640  | 1273.29930  | 3236.42820  | Detected    | Detected | Detected    | Detected    |
| 5687 | A_23_P304450  | GATA6    | Hs.514746 | GATA binding protein 6                                                                      | Homo sapiens GATA binding protein 6 (GATA6), mRNA [NM_005257]                                                                                                                     | 2.94847 | down | 3.21320 | down | 74.46387    | 227.33984   | 56.61322    | 160.40611   | Detected    | Detected | Detected    | Detected    |
| 5688 | A_23_P1387    | ARHGAP19 | Hs.80305  | Rho GTPase activating protein 19                                                            | Homo sapiens Rho GTPase activating protein 19 (ARHGAP19), mRNA [NM_032900]                                                                                                        | 2.94842 | down | 3.18578 | down | 257.29938   | 785.52826   | 232.28217   | 652.52470   | Detected    | Detected | Detected    | Detected    |
| 5689 | A_24_P41570   | H2AFZ    | Hs.119192 | H2A histone family, member Z                                                                | Homo sapiens H2A histone family, member Z (H2AFZ), mRNA [NM_002106]                                                                                                               | 2.94836 | down | 2.81480 | down | 16723.64800 | 51055.71500 | 17300.33400 | 42940.54300 | Detected    | Detected | Detected    | Detected    |
| 5690 | A_23_P68922   | MICALL1  | Hs.517610 | MICAL-like 1                                                                                | Homo sapiens MICAL-like 1 (MICALL1), mRNA [NM_033386]                                                                                                                             | 2.94674 | down | 3.08602 | down | 231.45456   | 706.22190   | 179.47130   | 488.38086   | Detected    | Detected | Detected    | Detected    |
| 5691 | A_24_P325046  |          | Hs.654700 |                                                                                             | Zinc finger OHC domain-containing protein 7 [Source:UniProtKB/Swiss-Prot;Acc:Q8H3Z6] [ENST0000032831]                                                                             | 2.94539 | down | 3.02629 | down | 151.96289   | 463.46194   | 115.93329   | 309.37473   | Detected    | Detected | Detected    | Detected    |
| 5692 | A_33_P3257150 | CDC42    | Hs.467637 | cell division cycle 42 (GTP binding protein, 25kDa)                                         | Homo sapiens cell division cycle 42 (GTP binding protein, 25kDa) (CDC42), transcript variant 3, mRNA [NM_001039802]                                                               | 2.94452 | down | 3.00471 | down | 2800.02000  | 8537.06000  | 2134.20300  | 5654.62500  | Detected    | Detected | Detected    | Detected    |
| 5693 | A_23_P74097   | TCEB3    | Hs.15535  | transcription elongation factor B (SII), polypeptide 3 (110kDa, elongin A)                  | Homo sapiens transcription elongation factor B (SII), polypeptide 3 (110kDa, elongin A) (TCEB3), mRNA [NM_003198]                                                                 | 2.94332 | down | 2.89827 | down | 995.47210   | 3033.89330  | 874.38120   | 2234.62840  | Detected    | Detected | Detected    | Detected    |

|      |               |              |           |                                                                    |                                                                                                                                                                                                                      |         |      |          |      |             |             |             |             |             |             |             |             |
|------|---------------|--------------|-----------|--------------------------------------------------------------------|----------------------------------------------------------------------------------------------------------------------------------------------------------------------------------------------------------------------|---------|------|----------|------|-------------|-------------|-------------|-------------|-------------|-------------|-------------|-------------|
| 5694 | A_23_P200976  | HY1          | Hs.709864 | hydroxypyruvate isomerase homolog (E. coli)                        | Homo sapiens hydroxypyruvate isomerase homolog (E. coli) (HY1). mRNA [NM_031207]                                                                                                                                     | 2.93989 | down | 2.79095  | down | 2990.41750  | 9103.22900  | 2955.39200  | 7273.31200  | Detected    | Detected    | Detected    | Detected    |
| 5695 | A_23_P143845  | TIPARP       | Hs.12813  | TCDD-inducible poly(ADP-ribose) polymerase                         | Homo sapiens TCDD-inducible poly(ADP-ribose) polymerase (TIPARP). mRNA [NM_015508]                                                                                                                                   | 2.93818 | down | 3.20387  | down | 6523.20300  | 19845.97700 | 5583.55800  | 15774.32400 | Detected    | Detected    | Detected    | Detected    |
| 5696 | A_23_P208310  | CD3EAP       | Hs.710495 | CD3e molecule, epsilon associated protein                          | Homo sapiens CD3e molecule, epsilon associated protein (CD3EAP). mRNA [NM_012099]                                                                                                                                    | 2.93518 | down | 3.28927  | down | 335.18106   | 1018.70210  | 284.77014   | 825.96160   | Detected    | Detected    | Detected    | Detected    |
| 5697 | A_32_P171313  | GNB4         | Hs.173030 | guanine nucleotide binding protein (G protein), beta polypeptide 4 | Homo sapiens guanine nucleotide binding protein (G protein), beta polypeptide 4 (GNB4). mRNA [NM_021629]                                                                                                             | 2.93409 | down | 2.70317  | down | 12750.47000 | 38737.61300 | 10215.64000 | 24350.30900 | Detected    | Detected    | Detected    | Detected    |
| 5698 | A_33_P3339070 | LOC100216001 |           | hypothetical LOC100216001                                          | Homo sapiens hypothetical LOC100216001 (LOC100216001). non-coding RNA [NR_024475]                                                                                                                                    | 2.93127 | down | 2.92962  | down | 80.41094    | 244.06439   | 55.68102    | 143.84119   | Detected    | Detected    | Detected    | Detected    |
| 5699 | A_33_P3406899 | TRAK1        | Hs.535711 | trafficking protein, kinesin binding 1                             | Homo sapiens trafficking protein, kinesin binding 1 (TRAK1). transcript variant 2. mRNA [NM_014965]                                                                                                                  | 2.92971 | down | 2.68842  | down | 1165.44210  | 3535.48170  | 1013.55620  | 2402.76250  | Detected    | Detected    | Detected    | Detected    |
| 5700 | A_23_P52761   | MMP7         | Hs.2256   | matrix metalloproteinase 7 (matrilysin, uterine)                   | Homo sapiens matrix metalloproteinase 7 (matrilysin, uterine) (MMP7). mRNA [NM_002423]                                                                                                                               | 2.92941 | down | 3.14511  | down | 15.54122    | 47.14092    | 13.93855    | 38.65622    | Detected    | Detected    | Compromised | Detected    |
| 5701 | A_33_P3254555 |              | Hs.721800 |                                                                    | DNA replication licensing factor MCM9 (Mini-chromosome maintenance deficient 9)(hMCM9)(Mini-chromosome maintenance deficient domain-containing protein 1) [Source:UniProtKB/Swiss-Prot;Acc:Q9NXL9] [ENST00000243218] | 2.92889 | down | 1.78353  | down | 16.83345    | 51.05166    | 20.76773    | 32.66146    | Detected    | Detected    | Detected    | Detected    |
| 5702 | A_24_P272225  | LOC645676    | Hs.568693 | hypothetical LOC645676                                             | Homo sapiens hypothetical LOC645676 (LOC645676). non-coding RNA [NR_027023]                                                                                                                                          | 2.92860 | down | 2.72217  | down | 435.37543   | 1320.25330  | 406.70908   | 976.25824   | Detected    | Detected    | Detected    | Detected    |
| 5703 | A_33_P3369829 | tcag7.1307   |           | hypothetical LOC154822                                             | Homo sapiens hypothetical LOC154822 (LOC154822). non-coding RNA [NR_024394]                                                                                                                                          | 2.92816 | down | 1.17935  | down | 6.03031     | 18.28381    | 3.08385     | 3.20701     | Compromised | Detected    | Compromised | Compromised |
| 5704 | A_24_P186274  | IGFBPL1      | Hs.349705 | insulin-like growth factor binding protein-like 1                  | Homo sapiens insulin-like growth factor binding protein-like 1 (IGFBPL1). mRNA [NM_001007563]                                                                                                                        | 2.92771 | down | 1.38712  | down | 16.92513    | 51.30895    | 22.91340    | 28.02642    | Detected    | Detected    | Detected    | Detected    |
| 5705 | A_33_P3306267 | PAX6         | Hs.270303 | paired box 6                                                       | Homo sapiens paired box 6 (PAX6). transcript variant 1. mRNA [NM_000280]                                                                                                                                             | 2.92371 | down | 4.01417  | down | 12.55757    | 38.01653    | 8.39845     | 29.72760    | Compromised | Detected    | Compromised | Detected    |
| 5706 | A_24_P63380   | BMPR1B       | Hs.598475 | bone morphogenetic protein receptor, type IB                       | Homo sapiens bone morphogenetic protein receptor, type IB (BMPR1B). mRNA [NM_001203]                                                                                                                                 | 2.92321 | down | 11.38564 | down | 4.49033     | 13.59159    | 3.05401     | 30.66152    | Compromised | Compromised | Compromised | Detected    |
| 5707 | A_33_P3235214 |              |           |                                                                    | Histone H2A type 2-A (H2A.2)(H2A/α) [Source:UniProtKB/Swiss-Prot;Acc:Q6F113] [ENST00000369159]                                                                                                                       | 2.92117 | down | 3.09691  | down | 5751.40770  | 17396.60700 | 3995.19530  | 10910.20200 | Detected    | Detected    | Detected    | Detected    |
| 5708 | A_24_P404033  | C15orf38     | Hs.6734   | chromosome 15 open reading frame 38                                | Homo sapiens chromosome 15 open reading frame 38 (C15orf38). mRNA [NM_182616]                                                                                                                                        | 2.92004 | down | 2.93227  | down | 173.78426   | 525.45180   | 138.88650   | 359.11148   | Detected    | Detected    | Detected    | Detected    |
| 5709 | A_33_P3339531 | CHADL        | Hs.344488 | chondroadherin-like                                                | Homo sapiens chondroadherin-like (CHADL). mRNA [NM_138481]                                                                                                                                                           | 2.91736 | down | 3.43575  | down | 77.06607    | 232.80196   | 68.10331    | 206.32674   | Detected    | Detected    | Detected    | Detected    |
| 5710 | A_32_P44568   | LDHA         | Hs.2795   | lactate dehydrogenase A                                            | Homo sapiens lactate dehydrogenase A (LDHA). transcript variant 1. mRNA [NM_005566]                                                                                                                                  | 2.91627 | down | 3.00010  | down | 17248.94700 | 52086.26600 | 13792.62900 | 36487.87000 | Detected    | Detected    | Detected    | Detected    |
| 5711 | A_33_P3408918 | SAA2         | Hs.1955   | serum amyloid A2                                                   | Homo sapiens serum amyloid A2 (SAA2). transcript variant 1. mRNA [NM_030754]                                                                                                                                         | 2.91487 | down | 2.43971  | down | 19.70596    | 59.47710    | 16.43667    | 35.36048    | Detected    | Detected    | Detected    | Detected    |
| 5712 | A_23_P27400   | HAS1         | Hs.57697  | hyaluronan synthase 1                                              | Homo sapiens hyaluronan synthase 1 (HAS1). mRNA [NM_001523]                                                                                                                                                          | 2.91396 | down | 3.34484  | down | 21.15866    | 63.84172    | 22.50650    | 66.38175    | Detected    | Detected    | Detected    | Detected    |
| 5713 | A_33_P3237096 | INPP5F       |           | inositol polyphosphate-5-phosphatase F                             | Homo sapiens inositol polyphosphate-5-phosphatase F (INPP5F). transcript variant 3. transcribed RNA [NR_003251]                                                                                                      | 2.91321 | down | 2.95004  | down | 251.82303   | 759.62585   | 194.63162   | 506.29930   | Detected    | Detected    | Detected    | Detected    |
| 5714 | A_33_P3312676 |              | Hs.279562 |                                                                    | Myelin transcription factor 1 (MyT1)(MyT1)(Proteolipid protein-binding protein)(PLPB1) [Source:UniProtKB/Swiss-Prot;Acc:Q01538] [ENST00000360149]                                                                    | 2.91135 | down | 4.22368  | down | 18.13263    | 54.66227    | 11.16169    | 41.57062    | Detected    | Detected    | Compromised | Detected    |
| 5715 | A_23_P109427  | GSTT2        | Hs.654462 | glutathione S-transferase theta 2                                  | Homo sapiens glutathione S-transferase theta 2 (GSTT2). mRNA [NM_000854]                                                                                                                                             | 2.90915 | down | 2.77277  | down | 1192.95310  | 3593.53900  | 1653.05050  | 4041.70730  | Detected    | Detected    | Detected    | Detected    |
| 5716 | A_23_P3312    | ISLR         | Hs.699822 | immunoglobulin superfamily containing leucine-rich repeat          | Homo sapiens immunoglobulin superfamily containing leucine-rich repeat (ISLR). transcript variant 1. mRNA [NM_005545]                                                                                                | 2.90689 | down | 3.20347  | down | 13129.58200 | 39519.65600 | 12272.19800 | 34666.41800 | Detected    | Detected    | Detected    | Detected    |
| 5717 | A_24_P22800   | PSG11        | Hs.646353 | pregnancy specific beta-1-glycoprotein 11                          | Homo sapiens pregnancy specific beta-1-glycoprotein 11 (PSG11). transcript variant 1. mRNA [NM_002785]                                                                                                               | 2.90641 | down | 2.75633  | down | 8.48527     | 25.53615    | 11.59793    | 28.18888    | Compromised | Detected    | Compromised | Detected    |
| 5718 | A_33_P3223116 |              |           |                                                                    | Homeodomain-interacting protein kinase 2 (hHIPk2)(EC 2.7.11.1) [Source:UniProtKB/Swiss-Prot;Acc:Q9H2X6] [ENST00000242845]                                                                                            | 2.90559 | down | 2.96668  | down | 314.96994   | 947.62540   | 261.35504   | 683.70200   | Detected    | Detected    | Detected    | Detected    |
| 5719 | A_33_P3361152 | LOC100134259 | Hs.114449 | similar to HCG1987718                                              | Homo sapiens similar to HCG1987718 (LOC100134259). non-coding RNA [NR_024452]                                                                                                                                        | 2.90042 | down | 3.53101  | down | 538.89636   | 1618.44840  | 252.78593   | 787.07770   | Detected    | Detected    | Detected    | Detected    |
| 5720 | A_24_P33895   | ATF3         | Hs.460    | activating transcription factor 3                                  | Homo sapiens activating transcription factor 3 (ATF3). transcript variant 4. mRNA [NM_001040619]                                                                                                                     | 2.89907 | down | 2.79579  | down | 46.31275    | 139.02478   | 48.77914    | 120.25544   | Detected    | Detected    | Detected    | Detected    |



|      |               |          |           |                                                               |                                                                                                                                   |         |      |          |             |             |            |             |             |             |             |          |
|------|---------------|----------|-----------|---------------------------------------------------------------|-----------------------------------------------------------------------------------------------------------------------------------|---------|------|----------|-------------|-------------|------------|-------------|-------------|-------------|-------------|----------|
| 5721 | A_23_P101476  | ZNF442   | Hs.253193 | zinc finger protein 442                                       | Homo sapiens zinc finger protein 442 (ZNF442), mRNA [NM_030824]                                                                   | 2.89644 | down | 2.98820  | 89.26200    | 267.71005   | 40.17199   | 105.85170   | Detected    | Detected    | Detected    | Detected |
| 5722 | A_23_P156310  | SKP2     | Hs.23348  | S-phase kinase-associated protein 2 (p45)                     | Homo sapiens S-phase kinase-associated protein 2 (p45) (SKP2), transcript variant 2, mRNA [NM_032637]                             | 2.89593 | down | 3.10167  | 266.01180   | 797.66907   | 227.98456  | 623.54360   | Detected    | Detected    | Detected    | Detected |
| 5723 | A_23_P38567   | CYTSB    | Hs.431045 | cytospin B                                                    | Homo sapiens cytospin B (CYTSB), transcript variant NSP5beta3alpha, mRNA [NM_152904]                                              | 2.89164 | down | 2.90011  | 449.70160   | 1346.48670  | 415.31137  | 1062.07320  | Detected    | Detected    | Detected    | Detected |
| 5724 | A_33_P3317979 | MYO5B    | Hs.720076 | myosin VB                                                     | Homo sapiens myosin VB (MYO5B), mRNA [NM_001090467]                                                                               | 2.88831 | down | 2.45665  | 123.38212   | 369.00275   | 19.03550   | 41.23574    | Detected    | Detected    | Detected    | Detected |
| 5725 | A_23_P217570  | CAPN6    | Hs.496593 | calpain 6                                                     | Homo sapiens calpain 6 (CAPN6), mRNA [NM_014289]                                                                                  | 2.88765 | down | 13.76587 | 4.85299     | 14.51067    | 2.66936    | 32.40231    | Compromised | Compromised | Compromised | Detected |
| 5726 | A_23_P216610  | SUSD1    | Hs.494827 | sushi domain containing 1                                     | Homo sapiens sushi domain containing 1 (SUSD1), mRNA [NM_022486]                                                                  | 2.88539 | down | 2.97186  | 381.25906   | 1139.09120  | 289.79547  | 759.42554   | Detected    | Detected    | Detected    | Detected |
| 5727 | A_24_P338187  | HNRNPH3  | Hs.643472 | heterogeneous nuclear ribonucleoprotein H3 (ZH9)              | Homo sapiens heterogeneous nuclear ribonucleoprotein H3 (ZH9) (HNRNPH3), transcript variant 2H9, mRNA [NM_012207]                 | 2.88428 | down | 2.87791  | 2350.77420  | 7020.71340  | 1341.57890 | 3404.54170  | Detected    | Detected    | Detected    | Detected |
| 5728 | A_23_P145904  | H2AFV    | Hs.488189 | H2A histone family, member V                                  | Homo sapiens H2A histone family, member V (H2AFV), transcript variant 1, mRNA [NM_012412]                                         | 2.88378 | down | 2.61924  | 11790.97500 | 35208.33000 | 9640.27400 | 22265.37700 | Detected    | Detected    | Detected    | Detected |
| 5729 | A_23_P214300  | GSTA2    | Hs.94107  | glutathione S-transferase alpha 2                             | Homo sapiens glutathione S-transferase alpha 2 (GSTA2), mRNA [NM_000846]                                                          | 2.87882 | down | 3.95407  | 39.77264    | 118.55846   | 21.59130   | 75.28162    | Detected    | Detected    | Detected    | Detected |
| 5730 | A_24_P178503  | ABCC9    | Hs.446050 | ATP-binding cassette, sub-family C (CFTR/MRP), member 9       | Homo sapiens ATP-binding cassette, sub-family C (CFTR/MRP), member 9 (ABCC9), transcript variant SUR2A-delta-14, mRNA [NM_020298] | 2.87856 | down | 2.97790  | 43.12259    | 128.53242   | 41.44601   | 108.83249   | Detected    | Detected    | Detected    | Detected |
| 5731 | A_33_P3376965 | CHAC1    | Hs.155569 | ChaC, cation transport regulator homolog 1 (E. coli)          | Homo sapiens ChaC, cation transport regulator homolog 1 (E. coli) (CHAC1), transcript variant 1, mRNA [NM_024111]                 | 2.87856 | down | 4.07107  | 29.74660    | 88.66355    | 23.81865   | 85.50494    | Detected    | Detected    | Detected    | Detected |
| 5732 | A_33_P3347477 |          | Hs.576925 |                                                               | DA375949 BRTHA2 Homo sapiens cDNA clone BRTHA2007423 5', mRNA sequence [DA375949]                                                 | 2.87360 | down | 3.38460  | 41.24181    | 122.71481   | 28.28162   | 84.40677    | Detected    | Detected    | Detected    | Detected |
| 5733 | A_33_P3307133 | GRIK2    | Hs.98262  | glutamate receptor, ionotropic, kainate 2                     | Homo sapiens glutamate receptor, ionotropic, kainate 2 (GRIK2), transcript variant 1, mRNA [NM_021956]                            | 2.87345 | down | 3.22887  | 11.48295    | 34.16568    | 7.92374    | 22.56036    | Compromised | Detected    | Compromised | Detected |
| 5734 | A_23_P305140  | C10orf32 | Hs.34492  | chromosome 10 open reading frame 32                           | Homo sapiens chromosome 10 open reading frame 32 (C10orf32), transcript variant 2, mRNA [NM_144591]                               | 2.87250 | down | 2.66775  | 1398.56620  | 4159.83700  | 937.18835  | 2204.63530  | Detected    | Detected    | Detected    | Detected |
| 5735 | A_23_P92202   | GMPPB    | Hs.567488 | GDP-mannose pyrophosphorylase B                               | Homo sapiens GDP-mannose pyrophosphorylase B (GMPPB), transcript variant 2, mRNA [NM_021971]                                      | 2.87243 | down | 3.10052  | 457.12076   | 1359.60940  | 455.60303  | 1245.62230  | Detected    | Detected    | Detected    | Detected |
| 5736 | A_23_P126120  | CENPL    | Hs.720473 | centromere protein L                                          | Homo sapiens centromere protein L (CENPL), transcript variant 2, mRNA [NM_033319]                                                 | 2.87010 | down | 3.07375  | 141.24939   | 419.77582   | 93.57575   | 253.62836   | Detected    | Detected    | Detected    | Detected |
| 5737 | A_24_P21447   | SURF6    | Hs.274430 | surfeit 6                                                     | Homo sapiens surfeit 6 (SURF6), mRNA [NM_006753]                                                                                  | 2.87005 | down | 2.74524  | 231.85654   | 689.03680   | 172.62419  | 417.87628   | Detected    | Detected    | Detected    | Detected |
| 5738 | A_24_P349547  |          |           |                                                               |                                                                                                                                   | 2.86924 | down | 2.42731  | 5768.00000  | 17136.63700 | 3106.61060 | 6649.32760  | Detected    | Detected    | Detected    | Detected |
| 5739 | A_23_P143535  | WDR4     | Hs.248815 | WD repeat domain 4                                            | Homo sapiens WD repeat domain 4 (WDR4), transcript variant 2, mRNA [NM_033661]                                                    | 2.86675 | down | 3.27096  | 118.41016   | 351.48870   | 97.66119   | 281.68400   | Detected    | Detected    | Detected    | Detected |
| 5740 | A_33_P3249185 |          |           |                                                               | GTP-binding protein SAR1a (COPII-associated small GTPase) [Source:UniProtKB/Swiss-Prot;Acc:Q9N9R3] [ENST00000373236]              | 2.86674 | down | 2.76199  | 1854.89580  | 5506.05960  | 1739.01220 | 4235.35250  | Detected    | Detected    | Detected    | Detected |
| 5741 | A_23_P22224   | EIF4EBP1 | Hs.411641 | eukaryotic translation initiation factor 4E binding protein 1 | Homo sapiens eukaryotic translation initiation factor 4E binding protein 1 (EIF4EBP1), mRNA [NM_004095]                           | 2.86628 | down | 2.78357  | 2969.64480  | 8813.65100  | 3649.69210 | 8958.25300  | Detected    | Detected    | Detected    | Detected |
| 5742 | A_33_P3286804 | ANO6     | Hs.505339 | anoctamin 6                                                   | Homo sapiens anoctamin 6 (ANO6), transcript variant 3, mRNA [NM_001142679]                                                        | 2.86492 | down | 3.82158  | 7.38647     | 21.85271    | 5.29618    | 17.84726    | Compromised | Detected    | Compromised | Detected |
| 5743 | A_24_P221414  | DYNC111  | Hs.440364 | dynein, cytoplasmic 1, intermediate chain 1                   | Homo sapiens dynein, cytoplasmic 1, intermediate chain 1 (DYNC111), transcript variant 1, mRNA [NM_004411]                        | 2.86434 | down | 4.10648  | 36.74196    | 108.97340   | 26.92175   | 97.48515    | Detected    | Detected    | Detected    | Detected |
| 5744 | A_23_P121665  | SORCS2   | Hs.479099 | sortilin-related VPS10 domain containing receptor 2           | Homo sapiens sortilin-related VPS10 domain containing receptor 2 (SORCS2), mRNA [NM_020777]                                       | 2.86362 | down | 2.14979  | 15.44346    | 45.79244    | 13.65241   | 25.88040    | Detected    | Detected    | Detected    | Detected |
| 5745 | A_33_P3321120 |          |           |                                                               |                                                                                                                                   | 2.86197 | down | 2.65583  | 580.11260   | 1719.13940  | 88.23506   | 206.63650   | Detected    | Detected    | Detected    | Detected |
| 5746 | A_23_P67339   | RCN3     | Hs.567550 | reticulocalbin 3, EF-hand calcium binding domain              | Homo sapiens reticulocalbin 3, EF-hand calcium binding domain (RCN3), mRNA [NM_020650]                                            | 2.85895 | down | 3.06314  | 3034.08180  | 8981.86400  | 2626.80200 | 7095.11430  | Detected    | Detected    | Detected    | Detected |
| 5747 | A_33_P3410836 | HIST1H4D | Hs.248179 | histone cluster 1, H4d                                        | Homo sapiens histone cluster 1, H4d (HIST1H4D), mRNA [NM_003539]                                                                  | 2.85727 | down | 3.04797  | 65.81031    | 194.70543   | 71.92723   | 193.31682   | Detected    | Detected    | Detected    | Detected |
| 5748 | A_33_P3404336 |          | Hs.676976 |                                                               | CDNA FLJ27256 fis. clone SYN09689 [Source:UniProtKB/TrEMBL;Acc:Q6ZNS0] [ENST00000426092]                                          | 2.85295 | down | 5.64382  | 58.86171    | 173.88405   | 28.69825   | 142.82162   | Detected    | Detected    | Detected    | Detected |
| 5749 | A_32_P934840  | C8orf34  | Hs.491941 | chromosome 8 open reading frame 34                            | Homo sapiens chromosome 8 open reading frame 34 (C8orf34), mRNA [NM_052958]                                                       | 2.85259 | down | 2.60545  | 27.51051    | 81.25890    | 20.41429   | 46.90112    | Detected    | Detected    | Detected    | Detected |
| 5750 | A_24_P136683  | CASBP    | Hs.532326 | carbonic anhydrase VB pseudogene                              | Homo sapiens carbonic anhydrase VB pseudogene (CASBP), non-coding RNA [NR_026551]                                                 | 2.85126 | down | 3.62421  | 53.27398    | 157.28429   | 47.90300   | 153.08800   | Detected    | Detected    | Detected    | Detected |

|      |               |              |           |                                                                                                              |                                                                                                                                                                            |         |      |         |      |             |              |             |              |             |          |             |             |
|------|---------------|--------------|-----------|--------------------------------------------------------------------------------------------------------------|----------------------------------------------------------------------------------------------------------------------------------------------------------------------------|---------|------|---------|------|-------------|--------------|-------------|--------------|-------------|----------|-------------|-------------|
| 5751 | A_23_P256473  | SEMA3C       | Hs.269109 | sema domain, immunoglobulin domain (Ig), short basic domain, secreted, (semaphorin) 3C                       | Homo sapiens sema domain, immunoglobulin domain (Ig), short basic domain, secreted, (semaphorin) 3C (SEMA3C), mRNA [NM_006379]                                             | 2.85076 | down | 2.57042 | down | 443.03766   | 1307.77930   | 348.35953   | 789.58325    | Detected    | Detected | Detected    | Detected    |
| 5752 | A_23_P166993  | EPHB1        | Hs.116092 | EPH receptor B1                                                                                              | Homo sapiens EPH receptor B1 (EPHB1), mRNA [NM_004441]                                                                                                                     | 2.85056 | down | 2.56736 | down | 103.46400   | 305.38837    | 88.78563    | 200.99918    | Detected    | Detected | Detected    | Detected    |
| 5753 | A_24_P20873   | HIST1H4I     | Hs.248172 | histone cluster 1, H4i                                                                                       | Homo sapiens histone cluster 1, H4i (HIST1H4I), mRNA [NM_003495]                                                                                                           | 2.85010 | down | 2.79919 | down | 70.15601    | 207.04198    | 65.08009    | 160.63701    | Detected    | Detected | Detected    | Detected    |
| 5754 | A_23_P124300  | BCMO1        | Hs.212172 | beta-carotene 15,15'-monooxygenase 1                                                                         | Homo sapiens beta-carotene 15,15'-monooxygenase 1 (BCMO1), mRNA [NM_017429]                                                                                                | 2.84954 | down | 2.32601 | down | 16.24094    | 47.92028     | 8.98558     | 18.42993     | Detected    | Detected | Compromised | Detected    |
| 5755 | A_23_P349398  | ZAR1         | Hs.276457 | zygote arrest 1                                                                                              | Homo sapiens zygote arrest 1 (ZAR1), mRNA [NM_175619]                                                                                                                      | 2.84840 | down | 1.75472 | down | 7.72593     | 22.78685     | 14.09247    | 21.80524     | Compromised | Detected | Compromised | Detected    |
| 5756 | A_23_P357760  | ARSD         | Hs.528631 | arylsulfatase D                                                                                              | Homo sapiens arylsulfatase D (ARSD), transcript variant 2, mRNA [NM_009589]                                                                                                | 2.84809 | down | 2.87236 | down | 48.94005    | 144.32819    | 54.39506    | 137.77270    | Detected    | Detected | Detected    | Detected    |
| 5757 | A_23_P414913  | GLIPR2       | Hs.493819 | GLI pathogenesis-related 2                                                                                   | Homo sapiens GLI pathogenesis-related 2 (GLIPR2), mRNA [NM_022343]                                                                                                         | 2.84742 | down | 2.89624 | down | 3772.81570  | 11123.73600  | 5311.05100  | 13563.75000  | Detected    | Detected | Detected    | Detected    |
| 5758 | A_23_P99906   | HOMER2       | Hs.578443 | homer homolog 2 (Drosophila)                                                                                 | Homo sapiens homer homolog 2 (Drosophila) (HOMER2), transcript variant 2, mRNA [NM_199330]                                                                                 | 2.84708 | down | 2.46108 | down | 63.56295    | 187.38577    | 62.03057    | 134.61620    | Detected    | Detected | Detected    | Detected    |
| 5759 | A_33_P3377209 | ENSA         | Hs.632456 | endosulfine alpha                                                                                            | Homo sapiens endosulfine alpha (ENSA), transcript variant 8, mRNA [NM_207168]                                                                                              | 2.84630 | down | 2.88374 | down | 428.56778   | 1263.08520   | 299.63043   | 761.91705    | Detected    | Detected | Detected    | Detected    |
| 5760 | A_33_P3372426 | ADAMTS5      | Hs.58324  | ADAM metallopeptidase with thrombospondin type 1 motif, 5                                                    | Homo sapiens ADAM metallopeptidase with thrombospondin type 1 motif, 5 (ADAMTS5), mRNA [NM_007038]                                                                         | 2.84608 | down | 2.43879 | down | 3666.35030  | 10804.73300  | 2374.10520  | 5105.52440   | Detected    | Detected | Detected    | Detected    |
| 5761 | A_23_P145657  | STAG3        | Hs.592283 | stromal antigen 3                                                                                            | Homo sapiens stromal antigen 3 (STAG3), mRNA [NM_012447]                                                                                                                   | 2.84447 | down | 3.06051 | down | 148.51106   | 437.41492    | 128.02700   | 345.51025    | Detected    | Detected | Detected    | Detected    |
| 5762 | A_24_P65121   | TTC23        | Hs.513195 | tetratricopeptide repeat domain 23                                                                           | Homo sapiens tetratricopeptide repeat domain 23 (TTC23), transcript variant 1, mRNA [NM_001040655]                                                                         | 2.84443 | down | 1.64532 | down | 14.83880    | 43.70466     | 10.54224    | 15.29494     | Detected    | Detected | Compromised | Compromised |
| 5763 | A_33_P3380417 | SLC25A30     | Hs.591230 | solute carrier family 25, member 30                                                                          | Homo sapiens solute carrier family 25, member 30 (SLC25A30), mRNA [NM_001010875]                                                                                           | 2.84300 | down | 2.95304 | down | 377.31598   | 1110.74680   | 281.06293   | 731.87740    | Detected    | Detected | Detected    | Detected    |
| 5764 | A_33_P3381313 | FAM160A1     | Hs.633810 | family with sequence similarity 160, member A1                                                               | Homo sapiens family with sequence similarity 160, member A1 (FAM160A1), mRNA [NM_001109977]                                                                                | 2.84269 | down | 1.03519 | down | 8.80203     | 25.90667     | 18.60300    | 16.98121     | Compromised | Detected | Detected    | Detected    |
| 5765 | A_33_P3251940 | LOC100131608 | Hs.650715 | hypothetical LOC100131608                                                                                    | PREDICTED: Homo sapiens hypothetical LOC100131608 (LOC100131608), mRNA [XM_001715126]                                                                                      | 2.84114 | down | 1.36759 | down | 6.93965     | 20.41564     | 4.59221     | 5.53787      | Compromised | Detected | Compromised | Compromised |
| 5766 | A_23_P94141   |              | Hs.30561  |                                                                                                              | Fibrinogen silencer-binding protein [Source:UniProtKB/Swiss-Prot;Acc:O95073] [ENST00000481490]                                                                             | 2.84102 | down | 2.66058 | down | 44.87030    | 131.99780    | 33.64722    | 78.93891     | Detected    | Detected | Detected    | Detected    |
| 5767 | A_23_P217637  | TIMM8A       | Hs.447877 | translocase of inner mitochondrial membrane 8 homolog A (yeast)                                              | Homo sapiens translocase of inner mitochondrial membrane 8 homolog A (yeast) (TIMM8A), nuclear gene encoding mitochondrial protein, transcript variant 1, mRNA [NM_004065] | 2.83829 | down | 2.72489 | down | 732.82760   | 2153.14450   | 778.02980   | 1869.43580   | Detected    | Detected | Detected    | Detected    |
| 5768 | A_33_P3236568 | LCE2D        | Hs.490225 | late cornified envelope 2D                                                                                   | Homo sapiens late cornified envelope 2D (LCE2D), mRNA [NM_178430]                                                                                                          | 2.83491 | down | 2.16293 | down | 12.01387    | 35.26597     | 5.55010     | 10.58545     | Detected    | Detected | Compromised | Compromised |
| 5769 | A_24_P384200  |              |           |                                                                                                              |                                                                                                                                                                            | 2.83421 | down | 2.66940 | down | 853.39120   | 2504.45730   | 88.53719    | 210.75713    | Detected    | Detected | Detected    | Detected    |
| 5770 | A_33_P3227556 |              |           |                                                                                                              |                                                                                                                                                                            | 2.83347 | down | 3.73158 | down | 94.60057    | 277.55237    | 57.66731    | 189.75280    | Detected    | Detected | Detected    | Detected    |
| 5771 | A_24_P54131   | DCLRE1B      | Hs.591412 | DNA cross-link repair 1B (PSO2 homolog, S. cerevisiae)                                                       | Homo sapiens DNA cross-link repair 1B (PSO2 homolog, S. cerevisiae) (DCLRE1B), mRNA [NM_022836]                                                                            | 2.83330 | down | 2.39591 | down | 217.30606   | 637.52435    | 154.04399   | 325.44750    | Detected    | Detected | Detected    | Detected    |
| 5772 | A_33_P3661631 | PCBD2        | Hs.710014 | pterin-4 alpha-carbinolamine dehydratase/dimerization cofactor of hepatocyte nuclear factor 1 alpha (TCF1) 2 | Homo sapiens pterin-4 alpha-carbinolamine dehydratase/dimerization cofactor of hepatocyte nuclear factor 1 alpha (TCF1) 2 (PCBD2), mRNA [NM_032151]                        | 2.83230 | down | 2.24508 | down | 121.33881   | 355.85443    | 96.63998    | 191.31761    | Detected    | Detected | Detected    | Detected    |
| 5773 | A_24_P186216  | PDS5A        | Hs.331431 | PDS5, regulator of cohesion maintenance, homolog A (S. cerevisiae)                                           | Homo sapiens PDS5, regulator of cohesion maintenance, homolog A (S. cerevisiae) (PDS5A), transcript variant 3, mRNA [NM_001100400]                                         | 2.83195 | down | 2.73586 | down | 313.74120   | 920.00510    | 192.64104   | 464.73816    | Detected    | Detected | Detected    | Detected    |
| 5774 | A_23_P323685  | HIST1H4H     | Hs.591790 | histone cluster 1, H4h                                                                                       | Homo sapiens histone cluster 1, H4h (HIST1H4H), mRNA [NM_003543]                                                                                                           | 2.82938 | down | 2.92027 | down | 99.91931    | 292.73413    | 82.56385    | 212.60733    | Detected    | Detected | Detected    | Detected    |
| 5775 | A_33_P3364989 | C20orf134    | Hs.592151 | chromosome 20 open reading frame 134                                                                         | Homo sapiens chromosome 20 open reading frame 134 (C20orf134), mRNA [NM_001024675]                                                                                         | 2.82925 | down | 3.17200 | down | 184.42924   | 540.29890    | 169.56700   | 474.28494    | Detected    | Detected | Detected    | Detected    |
| 5776 | A_24_P739582  |              |           |                                                                                                              |                                                                                                                                                                            | 2.82909 | down | 2.58908 | down | 158.73729   | 465.00674    | 25.88620    | 59.09896     | Detected    | Detected | Detected    | Detected    |
| 5777 | A_24_P212024  |              |           |                                                                                                              | Putative uncharacterized protein ENSP00000374793 [Source:UniProtKB/TrEMBL;Acc:AGNEDE] [ENST00000498435]                                                                    | 2.82864 | down | 1.63730 | down | 47.94943    | 140.44121    | 39.05457    | 56.38527     | Detected    | Detected | Detected    | Detected    |
| 5778 | A_24_P277934  | COL1A2       | Hs.489142 | collagen, type I, alpha 2                                                                                    | Homo sapiens collagen, type I, alpha 2 (COL1A2), mRNA [NM_000089]                                                                                                          | 2.82816 | down | 2.87648 | down | 68040.57000 | 199252.80000 | 52074.42000 | 132084.20000 | Detected    | Detected | Detected    | Detected    |
| 5779 | A_23_P36562   | ITGA5        | Hs.505654 | integrin, alpha 5 (fibronectin receptor, alpha polypeptide)                                                  | Homo sapiens integrin, alpha 5 (fibronectin receptor, alpha polypeptide) (ITGA5), mRNA [NM_002205]                                                                         | 2.82788 | down | 3.21559 | down | 3545.26900  | 10381.09500  | 3820.78000  | 10833.74900  | Detected    | Detected | Detected    | Detected    |
| 5780 | A_24_P65616   | PVR          | Hs.171844 | poliovirus receptor                                                                                          | Homo sapiens poliovirus receptor (PVR), transcript variant 1, mRNA [NM_006505]                                                                                             | 2.82763 | down | 3.37357 | down | 976.36597   | 2858.69900   | 690.17554   | 2053.12100   | Detected    | Detected | Detected    | Detected    |
| 5781 | A_24_P177585  | GEN1         | Hs.467793 | Gen homolog 1, endonuclease (Drosophila)                                                                     | Homo sapiens Gen homolog 1, endonuclease (Drosophila) (GEN1), transcript variant 1, mRNA [NM_182825]                                                                       | 2.82626 | down | 2.85019 | down | 27.77951    | 81.29620     | 14.92911    | 37.52087     | Detected    | Detected | Detected    | Detected    |

|      |               |          |           |                                                     |                                                                                                                                                                                                                                                                                                |         |      |         |      |             |              |             |             |             |          |             |          |
|------|---------------|----------|-----------|-----------------------------------------------------|------------------------------------------------------------------------------------------------------------------------------------------------------------------------------------------------------------------------------------------------------------------------------------------------|---------|------|---------|------|-------------|--------------|-------------|-------------|-------------|----------|-------------|----------|
| 5782 | A_23_P206960  | SEC14L1  | Hs.464184 | SEC14-like 1 ( <i>S. cerevisiae</i> )               | Homo sapiens SEC14-like 1 ( <i>S. cerevisiae</i> ) (SEC14L1), transcript variant 1, mRNA [NM_003003]                                                                                                                                                                                           | 2.82504 | down | 3.08211 | down | 1894.66710  | 5542.30600   | 1401.39800  | 3808.68120  | Detected    | Detected | Detected    | Detected |
| 5783 | A_33_P3310274 |          |           |                                                     | Leucine-rich repeat-containing G-protein coupled receptor 6 Precursor [Source:UniProtKB/Swiss-Prot;Acc:Q9H4K3] [ENST00000420582]                                                                                                                                                               | 2.82495 | down | 2.67037 | down | 13.79512    | 40.35233     | 13.31105    | 31.34366    | Detected    | Detected | Compromised | Detected |
| 5784 | A_33_P3356255 |          |           |                                                     | Annexin A11 (Annexin-11)(Annexin XI)(Calyculin-associated annexin 50)(CAP-50)(56 kDa autoantigen) [Source:UniProtKB/Swiss-Prot;Acc:P50995] [ENST00000372219]                                                                                                                                   | 2.82488 | down | 4.21063 | down | 101.17352   | 295.93726    | 73.14206    | 271.56890   | Detected    | Detected | Detected    | Detected |
| 5785 | A_23_P319565  | PGBD3    | Hs.654449 | piggyBac transposable element derived 3             | Homo sapiens piggyBac transposable element derived 3 (PGBD3), mRNA [NM_170753]                                                                                                                                                                                                                 | 2.82231 | down | 2.88236 | down | 928.10410   | 2712.27500   | 801.00214   | 2035.65860  | Detected    | Detected | Detected    | Detected |
| 5786 | A_23_P167479  | IL17B    | Hs.156979 | interleukin 17B                                     | Homo sapiens interleukin 17B (IL17B), mRNA [NM_014443]                                                                                                                                                                                                                                         | 2.82188 | down | 2.52967 | down | 17.24251    | 50.38161     | 17.19603    | 38.35809    | Detected    | Detected | Detected    | Detected |
| 5787 | A_33_P3328666 | CLTB     | Hs.484241 | clathrin, light chain (Lcb)                         | Homo sapiens clathrin, light chain (Lcb) (CLTB), transcript variant 2, mRNA [NM_007097]                                                                                                                                                                                                        | 2.81975 | down | 3.28659 | down | 838.24400   | 2447.45360   | 308.74893   | 894.77954   | Detected    | Detected | Detected    | Detected |
| 5788 | A_23_P212696  | FSTL1    | Hs.269512 | folliculin-like 1                                   | Homo sapiens follistatin-like 1 (FSTL1), mRNA [NM_007085]                                                                                                                                                                                                                                      | 2.81930 | down | 2.93837 | down | 46115.00000 | 134622.40000 | 36858.75400 | 95501.88000 | Detected    | Detected | Detected    | Detected |
| 5789 | A_33_P3368301 | BOLA3    | Hs.61472  | bolA homolog 3 ( <i>E. coli</i> )                   | Homo sapiens bolA homolog 3 ( <i>E. coli</i> ) (BOLA3), transcript variant 1, mRNA [NM_212552]                                                                                                                                                                                                 | 2.81827 | down | 2.57141 | down | 899.16250   | 2623.93850   | 407.87054   | 924.82580   | Detected    | Detected | Detected    | Detected |
| 5790 | A_23_P205177  | F10      | Hs.361463 | coagulation factor X                                | Homo sapiens coagulation factor X (F10), mRNA [NM_000504]                                                                                                                                                                                                                                      | 2.81744 | down | 2.99578 | down | 799.94440   | 2333.71200   | 950.68036   | 2511.36520  | Detected    | Detected | Detected    | Detected |
| 5791 | A_23_P47148   | NOX4     | Hs.371036 | NADPH oxidase 4                                     | Homo sapiens NADPH oxidase 4 (NOX4), transcript variant 1, mRNA [NM_016931]                                                                                                                                                                                                                    | 2.81733 | down | 2.72117 | down | 332.40770   | 969.71070    | 271.24277   | 650.84640   | Detected    | Detected | Detected    | Detected |
| 5792 | A_33_P3397233 |          | Hs.576854 |                                                     | DA992326 SYN0V4 Homo sapiens cDNA clone SYN0V4004518 5', mRNA sequence [DA992326]                                                                                                                                                                                                              | 2.81722 | down | 1.28605 | down | 14.50356    | 42.30858     | 21.80190    | 24.72399    | Detected    | Detected | Detected    | Detected |
| 5793 | A_33_P3359753 | C1orf96  | Hs.585011 | chromosome 1 open reading frame 96                  | Homo sapiens chromosome 1 open reading frame 96 (C1orf96), mRNA [NM_145257]                                                                                                                                                                                                                    | 2.81607 | down | 2.80603 | down | 1218.26260  | 3552.36060   | 856.10220   | 2118.28120  | Detected    | Detected | Detected    | Detected |
| 5794 | A_24_P36944   | CEP170   | Hs.533635 | centrosomal protein 170kDa                          | Homo sapiens centrosomal protein 170kDa (CEP170), transcript variant alpha, mRNA [NM_014812]                                                                                                                                                                                                   | 2.81537 | down | 3.01124 | down | 91.06509    | 265.47340    | 65.83502    | 174.81049   | Detected    | Detected | Detected    | Detected |
| 5795 | A_33_P3376527 | CHST10   | Hs.516370 | carbohydrate sulfotransferase 10                    | Homo sapiens carbohydrate sulfotransferase 10 (CHST10), mRNA [NM_049541]                                                                                                                                                                                                                       | 2.81124 | down | 3.08844 | down | 36.19944    | 105.37380    | 34.63421    | 94.32127    | Detected    | Detected | Detected    | Detected |
| 5796 | A_23_P435521  | TMEM106A | Hs.536474 | transmembrane protein 106A                          | Homo sapiens transmembrane protein 106A (TMEM106A), mRNA [NM_145041]                                                                                                                                                                                                                           | 2.81069 | down | 3.22372 | down | 13.62472    | 39.65275     | 10.31649    | 29.32615    | Compromised | Detected | Compromised | Detected |
| 5797 | A_33_P3360382 | MEG8     |           | maternally expressed 8 (non-protein coding)         | Homo sapiens maternally expressed 8 (non-protein coding) (MEG8), non-coding RNA [NR_024149]                                                                                                                                                                                                    | 2.81026 | down | 2.04787 | down | 35.93178    | 104.55823    | 33.20224    | 59.95642    | Detected    | Detected | Detected    | Detected |
| 5798 | A_33_P3244021 | MAVS     | Hs.570362 | mitochondrial antiviral signaling protein           | Homo sapiens mitochondrial antiviral signaling protein (MAVS), nuclear gene encoding mitochondrial protein, mRNA [NM_020746]                                                                                                                                                                   | 2.80984 | down | 2.84718 | down | 1661.90890  | 4835.28960   | 1254.75920  | 3150.22200  | Detected    | Detected | Detected    | Detected |
| 5799 | A_33_P3309289 |          | Hs.591947 |                                                     | CMP-N-acetylneuraminase-beta-galactosamide-alpha-2,3-sialyltransferase (Beta-galactoside alpha-2,3-sialyltransferase)(EC 2.4.99-1)(Alpha-2,3-sialyltransferase IV)(Alpha 2,3-SIT)(GalNAc-6S)(ST2)(SIAT4-C)(ST3Gal III)(SAT-3)(ST-4) [Source:UniProtKB/Swiss-Prot;Acc:Q11206] [ENST00000239597] | 2.80723 | down | 2.66477 | down | 24.08888    | 70.02098     | 21.26356    | 49.96451    | Detected    | Detected | Detected    | Detected |
| 5800 | A_23_P34915   | ATF3     | Hs.460    | activating transcription factor 3                   | Homo sapiens activating transcription factor 3 (ATF3), transcript variant 4, mRNA [NM_001040619]                                                                                                                                                                                               | 2.80710 | down | 2.84920 | down | 1185.92400  | 3447.05420   | 912.66490   | 2292.97800  | Detected    | Detected | Detected    | Detected |
| 5801 | A_23_P404730  | SNX26    | Hs.515364 | sorting nexin 26                                    | Homo sapiens sorting nexin 26 (SNX26), mRNA [NM_052948]                                                                                                                                                                                                                                        | 2.80701 | down | 3.77333 | down | 39.82050    | 115.73998    | 30.90159    | 102.81837   | Detected    | Detected | Detected    | Detected |
| 5802 | A_33_P3307980 |          |           |                                                     | Homo sapiens cDNA FLJ16364 fis, clone THYMU2032976, [AK131345]                                                                                                                                                                                                                                 | 2.80601 | down | 2.98574 | down | 64.99880    | 188.85439    | 16.29204    | 42.89371    | Detected    | Detected | Detected    | Detected |
| 5803 | A_33_P3397658 | SYNPO    |           | synaptopodin                                        | Synaptopodin [Source:UniProtKB/Swiss-Prot;Acc:Q8N3V7] [ENST00000394243]                                                                                                                                                                                                                        | 2.80589 | down | 3.32048 | down | 61.49945    | 178.67955    | 35.80001    | 104.82121   | Detected    | Detected | Detected    | Detected |
| 5804 | A_24_P20383   | ARPC4    | Hs.323342 | actin related protein 2/3 complex, subunit 4, 20kDa | Homo sapiens actin related protein 2/3 complex, subunit 4, 20kDa (ARPC4), transcript variant 1, mRNA [NM_005718]                                                                                                                                                                               | 2.80582 | down | 2.86767 | down | 296.60175   | 861.71967    | 285.19702   | 721.17303   | Detected    | Detected | Detected    | Detected |
| 5805 | A_24_P307974  |          |           |                                                     | Transcription initiation factor TFIIID subunit 8 (TBP-associated factor 8)(Transcription initiation factor TFIIID 43 kDa subunit)(TBP-associated factor 43 kDa)(HTAFI43)(Protein taube nuss) [Source:UniProtKB/Swiss-Prot;Acc:Q7Z7C8] [ENST00000372978]                                        | 2.80480 | down | 2.60120 | down | 129.15000   | 375.08508    | 204.22640   | 468.43686   | Detected    | Detected | Detected    | Detected |
| 5806 | A_24_P413126  | PMEPA1   | Hs.517155 | prostate transmembrane protein, androgen induced 1  | Homo sapiens prostate transmembrane protein, androgen induced 1 (PMEPA1), transcript variant 1, mRNA [NM_020182]                                                                                                                                                                               | 2.80414 | down | 2.94721 | down | 5515.95000  | 16015.94400  | 3364.78610  | 8744.47700  | Detected    | Detected | Detected    | Detected |
| 5807 | A_23_P343837  | PARP11   | Hs.657268 | poly (ADP-ribose) polymerase family, member 11      | Homo sapiens poly (ADP-ribose) polymerase family, member 11 (PARP11), mRNA [NM_020367]                                                                                                                                                                                                         | 2.80400 | down | 2.00975 | down | 37.74524    | 109.59040    | 32.87626    | 58.26250    | Detected    | Detected | Detected    | Detected |

|      |               |           |           |                                                                                                                  |                                                                                                                                                                                                                                        |         |      |         |      |             |             |             |             |             |          |             |             |
|------|---------------|-----------|-----------|------------------------------------------------------------------------------------------------------------------|----------------------------------------------------------------------------------------------------------------------------------------------------------------------------------------------------------------------------------------|---------|------|---------|------|-------------|-------------|-------------|-------------|-------------|----------|-------------|-------------|
| 5808 | A_33_P3230526 | MPRIP     | Hs.462341 | myosin phosphatase Rho interacting protein                                                                       | Homo sapiens myosin phosphatase Rho interacting protein (MPRIP), transcript variant 1, mRNA [NM_015134]                                                                                                                                | 2.80174 | down | 3.64604 | down | 380.14500   | 1102.83510  | 360.09558   | 1157.72460  | Detected    | Detected | Detected    | Detected    |
| 5809 | A_23_P77401   | CPPED1    | Hs.460002 | calcineurin-like phosphoesterase domain containing 1                                                             | Homo sapiens calcineurin-like phosphoesterase domain containing 1 (CPPED1), transcript variant 1, mRNA [NM_018340]                                                                                                                     | 2.80106 | down | 2.59022 | down | 1294.42420  | 3754.33080  | 962.52026   | 2198.42680  | Detected    | Detected | Detected    | Detected    |
| 5810 | A_23_P58819   | RANBP17   | Hs.410810 | RAN binding protein 17                                                                                           | Homo sapiens RAN binding protein 17 (RANBP17), mRNA [NM_022897]                                                                                                                                                                        | 2.80029 | down | 2.57896 | down | 171.39369   | 496.97168   | 149.00568   | 338.85400   | Detected    | Detected | Detected    | Detected    |
| 5811 | A_23_P370989  | MCM4      | Hs.460184 | minichromosome maintenance complex component 4                                                                   | Homo sapiens minichromosome maintenance complex component 4 (MCM4), transcript variant 1, mRNA [NM_005914]                                                                                                                             | 2.79776 | down | 2.91650 | down | 391.27927   | 1133.52300  | 325.44320   | 836.95610   | Detected    | Detected | Detected    | Detected    |
| 5812 | A_23_P165608  | SEMA4F    | Hs.25887  | sema domain, immunoglobulin domain (Ig), transmembrane domain (TM) and short cytoplasmic domain, (semaphorin) 4F | Homo sapiens sema domain, immunoglobulin domain (Ig), transmembrane domain (TM) and short cytoplasmic domain, (semaphorin) 4F (SEMA4F), mRNA [NM_004283]                                                                               | 2.79536 | down | 4.49420 | down | 104.54990   | 302.61780   | 44.46466    | 176.21089   | Detected    | Detected | Detected    | Detected    |
| 5813 | A_33_P3407356 | LOC731656 | Hs.702477 | hypothetical LOC731656                                                                                           | Homo sapiens hypothetical LOC731656 (LOC731656), non-coding RNA [NR_027454]                                                                                                                                                            | 2.79308 | down | 7.38485 | down | 10.73097    | 31.03528    | 3.46833     | 22.58541    | Compromised | Detected | Compromised | Detected    |
| 5814 | A_33_P3408221 | LOC729799 |           | SEC14-like 1 pseudogene                                                                                          | Homo sapiens SEC14-like 1 pseudogene (LOC729799), non-coding RNA [NR_026952]                                                                                                                                                           | 2.79248 | down | 2.74570 | down | 426.58786   | 1233.47740  | 390.06010   | 944.38617   | Detected    | Detected | Detected    | Detected    |
| 5815 | A_33_P3327165 | CCDC18    | Hs.716682 | coiled-coil domain containing 18                                                                                 | Homo sapiens coiled-coil domain containing 18 (CCDC18), mRNA [NM_206886]                                                                                                                                                               | 2.79160 | down | 2.49488 | down | 242.87560   | 702.05280   | 194.23943   | 427.31998   | Detected    | Detected | Detected    | Detected    |
| 5816 | A_24_P204244  | ANXA2P1   | Hs.546235 | annexin A2 pseudogene 1                                                                                          | Homo sapiens annexin A2 pseudogene 1 (ANXA2P1), non-coding RNA [NR_001562]                                                                                                                                                             | 2.79143 | down | 2.89681 | down | 26224.94000 | 75800.86000 | 26965.82200 | 68880.94500 | Detected    | Detected | Detected    | Detected    |
| 5817 | A_23_P73208   | GABPB2    | Hs.654699 | GA binding protein transcription factor, beta subunit 2                                                          | Homo sapiens GA binding protein transcription factor, beta subunit 2 (GABPB2), mRNA [NM_144618]                                                                                                                                        | 2.78768 | down | 3.94670 | down | 131.80171   | 380.44992   | 98.16433    | 341.62784   | Detected    | Detected | Detected    | Detected    |
| 5818 | A_33_P3343145 | MAP1B     | Hs.335079 | microtubule-associated protein 1B                                                                                | Homo sapiens microtubule-associated protein 1B (MAP1B), mRNA [NM_005909]                                                                                                                                                               | 2.78747 | down | 2.51066 | down | 67.20338    | 193.97003   | 82.20322    | 181.98758   | Detected    | Detected | Detected    | Detected    |
| 5819 | A_24_P824592  | RBMX      | Hs.380118 | RNA binding motif protein, X-linked                                                                              | Homo sapiens RNA binding motif protein, X-linked (RBMX), transcript variant 1, mRNA [NM_002139]                                                                                                                                        | 2.78353 | down | 2.26550 | down | 142.08969   | 409.53586   | 72.17301    | 144.17990   | Detected    | Detected | Detected    | Detected    |
| 5820 | A_23_P403886  | GLYAT     | Hs.145384 | glycine-N-acyltransferase                                                                                        | Homo sapiens glycine-N-acyltransferase (GLYAT), nuclear gene encoding mitochondrial protein, transcript variant 2, mRNA [NM_005838]                                                                                                    | 2.78224 | down | 1.66768 | down | 32.99304    | 95.04960    | 48.50984    | 71.33591    | Detected    | Detected | Detected    | Detected    |
| 5821 | A_33_P3282978 |           |           |                                                                                                                  | Brain and acute leukemia cytoplasmic protein [Source:UniProtKB/Swiss-Prot;Acc:Q8WXS3] [ENST00000306391]                                                                                                                                | 2.78135 | down | 2.23064 | down | 927.42770   | 2670.97020  | 146.13687   | 287.44458   | Detected    | Detected | Detected    | Detected    |
| 5822 | A_33_P3288104 |           |           |                                                                                                                  | Disheveled-associated activator of morphogenesis 2 [Source:UniProtKB/Swiss-Prot;Acc:Q86T65] [ENST00000405961]                                                                                                                          | 2.78130 | down | 2.95597 | down | 175.52922   | 505.51105   | 129.11739   | 336.55048   | Detected    | Detected | Detected    | Detected    |
| 5823 | A_23_P204484  | RAB35     | Hs.524788 | RAB35, member RAS oncogene family                                                                                | Homo sapiens RAB35, member RAS oncogene family (RAB35), transcript variant 1, mRNA [NM_006861]                                                                                                                                         | 2.77894 | down | 2.91155 | down | 3892.51270  | 11200.62100 | 3955.87060  | 10156.21200 | Detected    | Detected | Detected    | Detected    |
| 5824 | A_23_P48056   | CKAP4     | Hs.74368  | cytoskeleton-associated protein 4                                                                                | Homo sapiens cytoskeleton-associated protein 4 (CKAP4), mRNA [NM_006825]                                                                                                                                                               | 2.77724 | down | 2.82307 | down | 5516.12900  | 15862.84000 | 2588.54370  | 6443.81300  | Detected    | Detected | Detected    | Detected    |
| 5825 | A_24_P943095  | CYTSB     | Hs.431045 | cytospin B                                                                                                       | Homo sapiens cytosin B (CYTSB), transcript variant NSP5beta3beta, mRNA [NM_001033553]                                                                                                                                                  | 2.77506 | down | 2.35567 | down | 7.92652     | 22.77654    | 5.56396     | 11.55751    | Compromised | Detected | Compromised | Compromised |
| 5826 | A_23_P211445  | LIMK2     | Hs.474596 | LIM domain kinase 2                                                                                              | Homo sapiens LIM domain kinase 2 (LIMK2), transcript variant 2b, mRNA [NM_016733]                                                                                                                                                      | 2.77078 | down | 2.97249 | down | 1460.39330  | 4189.91260  | 1018.28600  | 2669.04800  | Detected    | Detected | Detected    | Detected    |
| 5827 | A_33_P3255794 | POLE      | Hs.524871 | polymerase (DNA directed), epsilon                                                                               | Homo sapiens polymerase (DNA directed), epsilon (POLE), mRNA [NM_006231]                                                                                                                                                               | 2.77059 | down | 2.08303 | down | 13.06518    | 37.48183    | 14.74840    | 27.08976    | Compromised | Detected | Compromised | Detected    |
| 5828 | A_24_P123408  | ABLIM3    | Hs.49688  | actin binding LIM protein family, member 3                                                                       | Homo sapiens actin binding LIM protein family, member 3 (ABLIM3), mRNA [NM_014945]                                                                                                                                                     | 2.77014 | down | 3.13022 | down | 392.89610   | 1126.39860  | 423.11890   | 1167.89310  | Detected    | Detected | Detected    | Detected    |
| 5829 | A_24_P867342  | AFMID     |           | arylfornamidase                                                                                                  | Homo sapiens arylfornamidase (AFMID), transcript variant 3, transcribed RNA [NR_027083]                                                                                                                                                | 2.76935 | down | 2.98407 | down | 41.14783    | 117.99358   | 41.07729    | 108.08778   | Detected    | Detected | Detected    | Detected    |
| 5830 | A_33_P3351120 | TXNRD1    | Hs.654922 | thioredoxin reductase 1                                                                                          | Homo sapiens thioredoxin reductase 1 (TXNRD1), transcript variant 1, mRNA [NM_003330]                                                                                                                                                  | 2.76764 | down | 2.60614 | down | 251.36260   | 720.34880   | 296.90070   | 682.29834   | Detected    | Detected | Detected    | Detected    |
| 5831 | A_23_P163455  | MAP1A     | Hs.194301 | microtubule-associated protein 1A                                                                                | Homo sapiens microtubule-associated protein 1A (MAP1A), mRNA [NM_002373]                                                                                                                                                               | 2.76546 | down | 3.05788 | down | 1430.77220  | 4097.04800  | 1251.72130  | 3375.15360  | Detected    | Detected | Detected    | Detected    |
| 5832 | A_24_P937325  |           |           |                                                                                                                  | FYVE, RhoGEF and PH domain-containing protein 4 (Actin filament-binding protein frabin)(FGD1)-related F-actin-binding protein(Zinc finger FYVE domain-containing protein 6) [Source:UniProtKB/Swiss-Prot;Acc:Q96M96] [ENST00000395742] | 2.76530 | down | 2.86912 | down | 20.78519    | 59.51542    | 14.10827    | 35.69336    | Detected    | Detected | Detected    | Detected    |
| 5833 | A_23_P36888   | FAM113B   | Hs.560100 | family with sequence similarity 113, member B                                                                    | Homo sapiens family with sequence similarity 113, member B (FAM113B), mRNA [NM_138371]                                                                                                                                                 | 2.76480 | down | 2.56070 | down | 99.67381    | 285.35016   | 115.46590   | 260.72230   | Detected    | Detected | Detected    | Detected    |
| 5834 | A_33_P3405204 | LOC729911 | Hs.513931 | hypothetical LOC729911                                                                                           | PREDICTED: Homo sapiens hypothetical LOC729911 (LOC729911), mRNA [XM_001134184]                                                                                                                                                        | 2.76365 | down | 5.47977 | down | 8.25306     | 23.61732    | 2.60537     | 12.58916    | Compromised | Detected | Compromised | Compromised |

|      |                |              |           |                                                                       |                                                                                                                                   |         |      |         |      |             |             |            |             |             |          |             |             |
|------|----------------|--------------|-----------|-----------------------------------------------------------------------|-----------------------------------------------------------------------------------------------------------------------------------|---------|------|---------|------|-------------|-------------|------------|-------------|-------------|----------|-------------|-------------|
| 5835 | A_23_P106127   | KIAA0586     | Hs.232532 | KIAA0586                                                              | Homo sapiens KIAA0586 (KIAA0586). mRNA [NM_014749]                                                                                | 2.76223 | down | 2.78690 | down | 705.65870   | 2018.30770  | 478.54684  | 1176.01120  | Detected    | Detected | Detected    | Detected    |
| 5836 | A_33_P3337450  |              |           |                                                                       | Putative uncharacterized protein FLJ34945 [Source:UniProtKB/Swiss-Prot;Acc:Q8NAA8] [ENST00000432274]                              | 2.76221 | down | 1.81172 | down | 22.67218    | 64.84600    | 15.24147   | 24.34909    | Detected    | Detected | Detected    | Detected    |
| 5837 | A_23_P203488   | SMPD1        | Hs.498173 | sphingomyelin phosphodiesterase 1, acid lysosomal                     | Homo sapiens sphingomyelin phosphodiesterase 1, acid lysosomal (SMPD1), transcript variant ASM-1, mRNA [NM_000543]                | 2.76033 | down | 3.10795 | down | 1617.96600  | 4624.48050  | 1497.21150 | 4103.19500  | Detected    | Detected | Detected    | Detected    |
| 5838 | A_23_P46309    | RCC1         | Hs.469723 | regulator of chromosome condensation 1                                | Homo sapiens regulator of chromosome condensation 1 (RCC1), transcript variant 1, mRNA [NM_001048194]                             | 2.75993 | down | 2.90787 | down | 193.28334   | 552.36390   | 279.18826  | 715.87573   | Detected    | Detected | Detected    | Detected    |
| 5839 | A_33_P3230166  | NALCN        | Hs.525146 | sodium leak channel, non-selective                                    | Homo sapiens sodium leak channel, non-selective (NALCN), mRNA [NM_052867]                                                         | 2.75838 | down | 2.31453 | down | 61.36000    | 175.25560   | 32.31105   | 65.94448    | Detected    | Detected | Detected    | Detected    |
| 5840 | A_23_P118158   | HS3ST2       | Hs.720257 | heparan sulfate (glucosamine) 3-O-sulfotransferase 2                  | Homo sapiens heparan sulfate (glucosamine) 3-O-sulfotransferase 2 (HS3ST2), mRNA [NM_006043]                                      | 2.75793 | down | 2.84155 | down | 611.00050   | 1744.84790  | 512.09920  | 1283.14380  | Detected    | Detected | Detected    | Detected    |
| 5841 | A_23_P32135    | C9orf9       | Hs.62595  | chromosome 9 open reading frame 9                                     | Homo sapiens chromosome 9 open reading frame 9 (C9orf9), mRNA [NM_018956]                                                         | 2.75741 | down | 2.60891 | down | 116.79298   | 333.46588   | 135.05087  | 310.68590   | Detected    | Detected | Detected    | Detected    |
| 5842 | A_23_P120125   | COLEC11      | Hs.32603  | collectin sub-family member 11                                        | Homo sapiens collectin sub-family member 11 (COLEC11), transcript variant 2, mRNA [NM_199235]                                     | 2.75507 | down | 2.56729 | down | 22.98119    | 65.55999    | 18.79908   | 42.55752    | Detected    | Detected | Detected    | Detected    |
| 5843 | A_24_P363100   | RGMB         | Hs.526902 | RGM domain family, member B                                           | Homo sapiens RGM domain family, member B (RGMB), mRNA [NM_001012761]                                                              | 2.75313 | down | 2.89126 | down | 280.16403   | 798.67840   | 394.51117  | 1005.80200  | Detected    | Detected | Detected    | Detected    |
| 5844 | A_33_P3280603  | PPP4R1L      | Hs.473179 | protein phosphatase 4, regulatory subunit 1-like                      | Homo sapiens protein phosphatase 4, regulatory subunit 1-like (PPP4R1L), non-coding RNA [NR_003050]                               | 2.75280 | down | 3.04041 | down | 43.26352    | 123.31873   | 43.98033   | 117.91144   | Detected    | Detected | Detected    | Detected    |
| 5845 | A_33_P3295200  | HAS1         | Hs.57697  | hyaluronan synthase 1                                                 | Homo sapiens hyaluronan synthase 1 (HAS1), mRNA [NM_001523]                                                                       | 2.74838 | down | 3.59578 | down | 22.04640    | 62.74035    | 27.31606   | 86.61165    | Detected    | Detected | Detected    | Detected    |
| 5846 | A_33_P3298612  |              |           |                                                                       |                                                                                                                                   | 2.74695 | down | 1.94244 | down | 9.03694     | 25.70428    | 8.93457    | 15.30335    | Compromised | Detected | Compromised | Detected    |
| 5847 | A_33_P3249439  | NCAPH2       | Hs.180903 | non-SMC condensin II complex, subunit H2                              | Homo sapiens non-SMC condensin II complex, subunit H2 (NCAPH2), transcript variant 2, mRNA [NM_152299]                            | 2.74255 | down | 2.88416 | down | 9450.85000  | 26838.54700 | 8418.79000 | 21410.91400 | Detected    | Detected | Detected    | Detected    |
| 5848 | A_23_P67725    | LMNB2        | Hs.538286 | lamin B2                                                              | Homo sapiens lamin B2 (LMNB2), mRNA [NM_032737]                                                                                   | 2.74158 | down | 2.59806 | down | 2246.70730  | 6377.94900  | 1009.52484 | 2312.76440  | Detected    | Detected | Detected    | Detected    |
| 5849 | A_23_P149975   | FAM107B      | Hs.446315 | family with sequence similarity 107, member B                         | Homo sapiens family with sequence similarity 107, member B (FAM107B), mRNA [NM_031453]                                            | 2.74158 | down | 2.55354 | down | 2922.19820  | 8295.51100  | 2649.31500 | 5965.42400  | Detected    | Detected | Detected    | Detected    |
| 5850 | A_23_P165521   | STRN         | Hs.656726 | striatin, calmodulin binding protein                                  | Homo sapiens striatin, calmodulin binding protein (STRN), mRNA [NM_003162]                                                        | 2.73976 | down | 2.37791 | down | 34.30307    | 97.31465    | 42.95839   | 90.07593    | Detected    | Detected | Detected    | Detected    |
| 5851 | A_32_P70203    | FAM41C       | Hs.449006 | family with sequence similarity 41, member C                          | Homo sapiens family with sequence similarity 41, member C (FAM41C), non-coding RNA [NR_027055]                                    | 2.73953 | down | 1.17888 | down | 35.19427    | 99.83477    | 3.14977    | 3.27428     | Detected    | Detected | Compromised | Compromised |
| 5852 | A_33_P3218905  | FAM13AOS     | Hs.703446 | FAM13A opposite strand (non-protein coding)                           | Homo sapiens FAM13A opposite strand (non-protein coding) (FAM13AOS), non-coding RNA [NR_002806]                                   | 2.73909 | down | 2.46612 | down | 37.77195    | 107.12952   | 23.80614   | 51.76888    | Detected    | Detected | Detected    | Detected    |
| 5853 | A_23_P341275   | POP1         | Hs.252828 | processing of precursor 1, ribonuclease P/MRP subunit (S. cerevisiae) | Homo sapiens processing of precursor 1, ribonuclease P/MRP subunit (S. cerevisiae) (POP1), transcript variant 3, mRNA [NM_015029] | 2.73666 | down | 2.83087 | down | 1654.27370  | 4687.72300  | 1311.80800 | 3274.57860  | Detected    | Detected | Detected    | Detected    |
| 5854 | A_24_P121413   | TRAM2        | Hs.520182 | translocation associated membrane protein 2                           | Homo sapiens translocation associated membrane protein 2 (TRAM2), mRNA [NM_012288]                                                | 2.73623 | down | 2.57238 | down | 4790.47200  | 13572.64700 | 3906.67240 | 8861.51500  | Detected    | Detected | Detected    | Detected    |
| 5855 | A_24_P383598   |              |           |                                                                       |                                                                                                                                   | 2.73452 | down | 2.23353 | down | 443.29926   | 1255.19560  | 73.45451   | 144.66933   | Detected    | Detected | Detected    | Detected    |
| 5856 | A_24_P205213   | ARSB         | Hs.149103 | arylsulfatase B                                                       | Homo sapiens arylsulfatase B (ARSB), transcript variant 2, mRNA [NM_198709]                                                       | 2.73162 | down | 2.61913 | down | 111.82578   | 316.29755   | 139.22707  | 321.54830   | Detected    | Detected | Detected    | Detected    |
| 5857 | A_23_P153360   | C19orf42     | Hs.356467 | chromosome 19 open reading frame 42                                   | Homo sapiens chromosome 19 open reading frame 42 (C19orf42), mRNA [NM_024104]                                                     | 2.73159 | down | 2.87773 | down | 1466.28810  | 4147.33000  | 1190.49680 | 3020.94920  | Detected    | Detected | Detected    | Detected    |
| 5858 | A_23_P88222    | PLD4         | Hs.407101 | phospholipase D family, member 4                                      | Homo sapiens phospholipase D family, member 4 (PLD4), mRNA [NM_138790]                                                            | 2.73117 | down | 1.45187 | down | 7.57155     | 21.41245    | 4.13943    | 5.29950     | Compromised | Detected | Compromised | Compromised |
| 5859 | A_33_P3272558  | NCAPH2       | Hs.180903 | non-SMC condensin II complex, subunit H2                              | Homo sapiens non-SMC condensin II complex, subunit H2 (NCAPH2), transcript variant 2, mRNA [NM_152299]                            | 2.73010 | down | 2.70022 | down | 9339.20500  | 26401.06800 | 9307.85900 | 22162.29500 | Detected    | Detected | Detected    | Detected    |
| 5860 | A_33_P3842551  | IKZF2        | Hs.604950 | IKAROS family zinc finger 2 (Helios)                                  | Homo sapiens IKAROS family zinc finger 2 (Helios) (IKZF2), transcript variant 2, mRNA [NM_001079526]                              | 2.72992 | down | 3.73141 | down | 6.05244     | 17.10856    | 2.44329    | 8.03921     | Compromised | Detected | Compromised | Compromised |
| 5861 | A_32_P809810   | LOC100130433 | Hs.638427 | hypothetical protein LOC100130433                                     | Homo sapiens cDNA FLJ38936 fis, clone NT2NE2015275. [AK096255]                                                                    | 2.72914 | down | 1.81372 | down | 73.74474    | 208.39592   | 40.71933   | 65.12342    | Detected    | Detected | Detected    | Detected    |
| 5862 | A_33_P3413523  | DBF4         | Hs.485380 | DBF4 homolog (S. cerevisiae)                                          | Homo sapiens DBF4 homolog (S. cerevisiae) (DBF4), mRNA [NM_008716]                                                                | 2.72609 | down | 2.74662 | down | 241.25146   | 680.99347   | 128.35799  | 310.87576   | Detected    | Detected | Detected    | Detected    |
| 5863 | A_32_P148345   | ANXA2        | Hs.511605 | annexin A2                                                            | Homo sapiens annexin A2 (ANXA2), transcript variant 2, mRNA [NM_001002857]                                                        | 2.72543 | down | 2.27466 | down | 20438.35700 | 57678.43400 | 1060.35330 | 2126.82740  | Detected    | Detected | Detected    | Detected    |
| 5864 | A_33_P33238920 | INPP5F       | Hs.369755 | inositol polyphosphate-5-phosphatase F                                | Homo sapiens inositol polyphosphate-5-phosphatase F (INPP5F), transcript variant 1, mRNA [NM_014937]                              | 2.72499 | down | 2.52517 | down | 67.14090    | 189.44588   | 53.78373   | 119.75888   | Detected    | Detected | Detected    | Detected    |
| 5865 | A_23_P145761   | ARL4A        | Hs.245540 | ADP-ribosylation factor-like 4A                                       | Homo sapiens ADP-ribosylation factor-like 4A (ARL4A), transcript variant 1, mRNA [NM_005738]                                      | 2.72463 | down | 2.33214 | down | 283.53006   | 799.90686   | 201.56413  | 414.50912   | Detected    | Detected | Detected    | Detected    |

|      |               |           |           |                                                                      |                                                                                                                                     |         |      |         |      |             |              |             |             |             |             |             |             |
|------|---------------|-----------|-----------|----------------------------------------------------------------------|-------------------------------------------------------------------------------------------------------------------------------------|---------|------|---------|------|-------------|--------------|-------------|-------------|-------------|-------------|-------------|-------------|
| 5866 | A_23_P142239  | YIF1B     | Hs.280741 | Yip1 interacting factor homolog B (S. cerevisiae)                    | Homo sapiens Yip1 interacting factor homolog B (S. cerevisiae) (YIF1B), transcript variant 2, mRNA [NM_033557]                      | 2.72344 | down | 3.83794 | down | 20.83361    | 58.75097     | 11.37190    | 38.48551    | Detected    | Detected    | Compromised | Detected    |
| 5867 | A_23_P391725  | DR1       | Hs.348418 | down-regulator of transcription 1, TBP-binding (negative cofactor 2) | Homo sapiens down-regulator of transcription 1, TBP-binding (negative cofactor 2) (DR1), mRNA [NM_001938]                           | 2.72033 | down | 2.54984 | down | 1734.64370  | 4886.12000   | 1154.77270  | 2596.41820  | Detected    | Detected    | Detected    | Detected    |
| 5868 | A_23_P88626   | ANPEP     | Hs.1239   | alanyl (membrane) aminopeptidase                                     | Homo sapiens alanyl (membrane) aminopeptidase (ANPEP), mRNA [NM_001150]                                                             | 2.71839 | down | 3.00064 | down | 7205.97360  | 20283.25400  | 7611.53860  | 20139.64300 | Detected    | Detected    | Detected    | Detected    |
| 5869 | A_23_P100074  | AVEN      | Hs.555966 | apoptosis, caspase activation inhibitor                              | Homo sapiens apoptosis, caspase activation inhibitor (AVEN), mRNA [NM_020371]                                                       | 2.71674 | down | 2.74707 | down | 2960.03540  | 8326.81000   | 2313.94360  | 5605.15100  | Detected    | Detected    | Detected    | Detected    |
| 5870 | A_23_P71644   | FANCG     | Hs.591084 | Fanconi anemia, complementation group G                              | Homo sapiens Fanconi anemia, complementation group G (FANCG), mRNA [NM_004629]                                                      | 2.71517 | down | 2.84118 | down | 1678.57390  | 4719.22500   | 1320.41400  | 3308.06420  | Detected    | Detected    | Detected    | Detected    |
| 5871 | A_33_P3289045 | GSTT2B    | Hs.656498 | glutathione S-transferase theta 2B (gene/pseudogene)                 | Homo sapiens glutathione S-transferase theta 2B (gene/pseudogene) (GSTT2B), mRNA [NM_001080843]                                     | 2.71213 | down | 2.53278 | down | 450.79840   | 1265.97580   | 691.95807   | 1545.40380  | Detected    | Detected    | Detected    | Detected    |
| 5872 | A_23_P151820  | RIN3      | Hs.326822 | Ras and Rab interactor 3                                             | Homo sapiens Ras and Rab interactor 3 (RIN3), mRNA [NM_024832]                                                                      | 2.71206 | down | 3.28497 | down | 505.42352   | 1419.34660   | 440.24030   | 1275.22400  | Detected    | Detected    | Detected    | Detected    |
| 5873 | A_24_P266285  | IQCE      | Hs.520627 | IQ motif containing E                                                | Homo sapiens IQ motif containing E (IQCE), transcript variant 1, mRNA [NM_152558]                                                   | 2.71137 | down | 3.05621 | down | 138.20790   | 388.02097    | 174.45781   | 470.15268   | Detected    | Detected    | Detected    | Detected    |
| 5874 | A_24_P302685  | ARHGEF4   | Hs.469935 | Rho guanine nucleotide exchange factor (GEF) 4                       | Homo sapiens Rho guanine nucleotide exchange factor (GEF) 4 (ARHGEF4), transcript variant 1, mRNA [NM_015320]                       | 2.70945 | down | 1.84893 | down | 3.91432     | 10.98175     | 8.35678     | 13.62465    | Compromised | Compromised | Compromised | Detected    |
| 5875 | A_23_P357316  | UPP2      | Hs.128427 | uridine phosphorylase 2                                              | Homo sapiens uridine phosphorylase 2 (UPP2), transcript variant 1, mRNA [NM_173355]                                                 | 2.70832 | down | 1.14317 | down | 7.80181     | 21.87900     | 7.28632     | 7.34486     | Compromised | Detected    | Compromised | Compromised |
| 5876 | A_23_P55998   | SLC1A5    | Hs.631582 | solute carrier family 1 (neutral amino acid transporter), member 5   | Homo sapiens solute carrier family 1 (neutral amino acid transporter), member 5 (SLC1A5), transcript variant 1, mRNA [NM_005628]    | 2.70739 | down | 2.91471 | down | 994.70447   | 2788.54600   | 1100.99220  | 2829.72830  | Detected    | Detected    | Detected    | Detected    |
| 5877 | A_33_P3413025 |           | Hs.74647  |                                                                      | Putative uncharacterized protein ENSP00000374964 [Source:UniProtKB/TrEMBL;Acc:AGNM17][ENST00000390457]                              | 2.70633 | down | 2.72611 | down | 27.33961    | 76.61353     | 7.29396     | 17.53366    | Detected    | Detected    | Compromised | Detected    |
| 5878 | A_24_P133253  | KITLG     | Hs.1048   | KIT ligand                                                           | Homo sapiens KIT ligand (KITLG), transcript variant b, mRNA [NM_000899]                                                             | 2.70490 | down | 2.36191 | down | 2280.19500  | 6386.40400   | 1364.39650  | 2841.64620  | Detected    | Detected    | Detected    | Detected    |
| 5879 | A_23_P209347  | ANKRD44   | Hs.654819 | ankyrin repeat domain 44                                             | Homo sapiens ankyrin repeat domain 44 (ANKRD44), mRNA [NM_153697]                                                                   | 2.70444 | down | 2.22571 | down | 21.50489    | 60.22086     | 21.18377    | 41.57541    | Detected    | Detected    | Detected    | Detected    |
| 5880 | A_23_P41267   | LOC401127 | Hs.383197 | WD repeat domain 5 pseudogene                                        | Homo sapiens WD repeat domain 5 pseudogene (LOC401127), non-coding RNA [NR_026854]                                                  | 2.70186 | down | 2.86633 | down | 334.72890   | 936.46070    | 336.61120   | 850.78670   | Detected    | Detected    | Detected    | Detected    |
| 5881 | A_33_P3424864 |           |           |                                                                      |                                                                                                                                     | 2.69985 | down | 4.08761 | down | 12.31601    | 34.43050     | 6.09761     | 21.97832    | Detected    | Detected    | Compromised | Detected    |
| 5882 | A_23_P105873  | TRPC4     | Hs.262960 | transient receptor potential cation channel, subfamily C, member 4   | Homo sapiens transient receptor potential cation channel, subfamily C, member 4 (TRPC4), transcript variant alpha, mRNA [NM_016179] | 2.69969 | down | 2.50528 | down | 86.88139    | 242.86981    | 78.24825    | 172.86086   | Detected    | Detected    | Detected    | Detected    |
| 5883 | A_33_P3318122 | C16orf62  | Hs.654964 | chromosome 16 open reading frame 62                                  | Homo sapiens chromosome 16 open reading frame 62 (C16orf62), mRNA [NM_020314]                                                       | 2.69875 | down | 2.81777 | down | 304.46762   | 850.81870    | 237.28877   | 589.58777   | Detected    | Detected    | Detected    | Detected    |
| 5884 | A_33_P3357247 | USP36     | Hs.464243 | ubiquitin specific peptidase 36                                      | Homo sapiens ubiquitin specific peptidase 36 (USP36), mRNA [NM_025090]                                                              | 2.69816 | down | 3.05170 | down | 2042.55550  | 5706.56150   | 1825.73410  | 4912.97300  | Detected    | Detected    | Detected    | Detected    |
| 5885 | A_23_P362712  | ABHD11    | Hs.647045 | abhydrolase domain containing 11                                     | Homo sapiens abhydrolase domain containing 11 (ABHD11), transcript variant 6, mRNA [NM_148916]                                      | 2.69799 | down | 2.79960 | down | 311.63640   | 870.60520    | 409.26874   | 1010.34600  | Detected    | Detected    | Detected    | Detected    |
| 5886 | A_33_P3340752 |           |           |                                                                      |                                                                                                                                     | 2.69784 | down | 3.28538 | down | 25.30535    | 70.69058     | 21.75145    | 63.01438    | Detected    | Detected    | Detected    | Detected    |
| 5887 | A_23_P127175  | SAR1A     | Hs.499960 | SAR1 homolog A (S. cerevisiae)                                       | Homo sapiens SAR1 homolog A (S. cerevisiae) (SAR1A), transcript variant 2, mRNA [NM_020150]                                         | 2.69477 | down | 2.58337 | down | 12799.07600 | 35713.52000  | 11574.11500 | 26365.70000 | Detected    | Detected    | Detected    | Detected    |
| 5888 | A_33_P3401647 | PPP1R14A  | Hs.631569 | protein phosphatase 1, regulatory (inhibitor) subunit 14A            | Homo sapiens protein phosphatase 1, regulatory (inhibitor) subunit 14A (PPP1R14A), mRNA [NM_033256]                                 | 2.69448 | down | 1.91201 | down | 35.51206    | 99.07933     | 28.80223    | 48.56027    | Detected    | Detected    | Detected    | Detected    |
| 5889 | A_33_P3251985 | MFSO1     | Hs.58663  | major facilitator superfamily domain containing 1                    | Homo sapiens major facilitator superfamily domain containing 1 (MFSO1), mRNA [NM_022736]                                            | 2.69425 | down | 2.62283 | down | 2021.91590  | 5640.70750   | 1849.33250  | 4277.10800  | Detected    | Detected    | Detected    | Detected    |
| 5890 | A_23_P435636  | DAND5     | Hs.331981 | DAN domain family, member 5                                          | Homo sapiens DAN domain family, member 5 (DAND5), mRNA [NM_152854]                                                                  | 2.69356 | down | 4.58598 | down | 28.79373    | 80.30779     | 12.55294    | 50.76249    | Detected    | Detected    | Compromised | Detected    |
| 5891 | A_32_P52911   | ADI1      | Hs.502773 | acireductone dioxygenase 1                                           | Homo sapiens acireductone dioxygenase 1 (ADI1), mRNA [NM_018269]                                                                    | 2.69152 | down | 2.63400 | down | 1000.77290  | 2789.11720   | 714.53820   | 1659.61220  | Detected    | Detected    | Detected    | Detected    |
| 5892 | A_23_P58002   | TCTA      | Hs.517962 | T-cell leukemia translocation altered gene                           | Homo sapiens T-cell leukemia translocation altered gene (TCTA), mRNA [NM_022171]                                                    | 2.69057 | down | 2.69221 | down | 514.23970   | 1432.65840   | 531.15250   | 1280.93630  | Detected    | Detected    | Detected    | Detected    |
| 5893 | A_23_P85164   | DNASE1L1  | Hs.401929 | deoxyribonuclease I-like 1                                           | Homo sapiens deoxyribonuclease I-like 1 (DNASE1L1), transcript variant 1, mRNA [NM_006730]                                          | 2.69042 | down | 2.75214 | down | 833.20905   | 2321.17000   | 758.14100   | 1839.86550  | Detected    | Detected    | Detected    | Detected    |
| 5894 | A_23_P40718   | PARVB     | Hs.475074 | parvin, beta                                                         | Homo sapiens parvin, beta (PARVB), transcript variant 1, mRNA [NM_001003828]                                                        | 2.69034 | down | 2.96786 | down | 733.58570   | 2043.57390   | 793.05600   | 2075.45480  | Detected    | Detected    | Detected    | Detected    |
| 5895 | A_33_P3262475 |           |           |                                                                      |                                                                                                                                     | 2.68914 | down | 1.96806 | down | 9.39088     | 26.14885     | 8.60463     | 14.93264    | Compromised | Detected    | Compromised | Compromised |
| 5896 | A_33_P3243337 | C19orf10  | Hs.465645 | chromosome 19 open reading frame 10                                  | Homo sapiens chromosome 19 open reading frame 10 (C19orf10), mRNA [NM_019107]                                                       | 2.68806 | down | 2.19481 | down | 60259.35500 | 167599.48000 | 51519.70700 | 99709.41400 | Detected    | Detected    | Detected    | Detected    |
| 5897 | A_23_P99063   | LUM       | Hs.406475 | lumican                                                              | Homo sapiens lumican (LUM), mRNA [NM_002345]                                                                                        | 2.68582 | down | 2.67403 | down | 3847.00300  | 10698.72300  | 2716.49880  | 6405.33640  | Detected    | Detected    | Detected    | Detected    |

|      |               |           |           |                                                                      |                                                                                                                                                                                                 |         |      |         |      |             |             |             |             |             |             |             |          |
|------|---------------|-----------|-----------|----------------------------------------------------------------------|-------------------------------------------------------------------------------------------------------------------------------------------------------------------------------------------------|---------|------|---------|------|-------------|-------------|-------------|-------------|-------------|-------------|-------------|----------|
| 5898 | A_23_P41166   | B3GALNT1  | Hs.418062 | beta-1,3-N-acetylgalactosaminyltransferase 1 (globoside blood group) | Homo sapiens beta-1,3-N-acetylgalactosaminyltransferase 1 (globoside blood group) (B3GALNT1), transcript variant 5, mRNA [NM_001038628]                                                         | 2.68576 | down | 2.97146 | down | 431.74652   | 1200.68570  | 358.65360   | 939.74740   | Detected    | Detected    | Detected    | Detected |
| 5899 | A_33_P3287680 | C3orf43   | Hs.631933 | chromosome 3 open reading frame 43                                   | Homo sapiens chromosome 3 open reading frame 43 (C3orf43), mRNA [NM_001077657]                                                                                                                  | 2.68566 | down | 4.05640 | down | 24.22129    | 67.35677    | 14.36437    | 51.37987    | Detected    | Detected    | Detected    | Detected |
| 5900 | A_23_P39050   | ZNF823    | Hs.142167 | zinc finger protein 823                                              | Homo sapiens zinc finger protein 823 (ZNF823), mRNA [NM_001080493]                                                                                                                              | 2.68554 | down | 2.52417 | down | 190.26483   | 529.08185   | 112.03851   | 249.37425   | Detected    | Detected    | Detected    | Detected |
| 5901 | A_24_P876522  | GPX8      | Hs.289044 | glutathione peroxidase 8 (putative)                                  | Homo sapiens glutathione peroxidase 8 (putative) (GPX8), mRNA [NM_001008397]                                                                                                                    | 2.68237 | down | 2.65909 | down | 2686.06450  | 7460.49200  | 2674.32350  | 6270.64840  | Detected    | Detected    | Detected    | Detected |
| 5902 | A_33_P3242603 | LOC645676 | Hs.568693 | hypothetical LOC645676                                               | Homo sapiens hypothetical LOC645676 (LOC645676), non-coding RNA [NR_027023]                                                                                                                     | 2.68230 | down | 3.03152 | down | 316.02106   | 877.72090   | 259.16720   | 692.79700   | Detected    | Detected    | Detected    | Detected |
| 5903 | A_33_P3402103 |           | Hs.403187 |                                                                      | UPF0490 protein C1orf201 [Source:UniProtKB/Swiss-Prot;Acc:Q5THT4] [ENST00000399974]                                                                                                             | 2.68160 | down | 2.37275 | down | 45.79633    | 127.16200   | 45.21000    | 94.59160    | Detected    | Detected    | Detected    | Detected |
| 5904 | A_23_P154605  | SULF2     | Hs.162016 | sulfatase 2                                                          | Homo sapiens sulfatase 2 (SULF2), transcript variant 1, mRNA [NM_018837]                                                                                                                        | 2.68092 | down | 3.21584 | down | 125.06792   | 347.18660   | 98.86739    | 280.35782   | Detected    | Detected    | Detected    | Detected |
| 5905 | A_33_P3336686 | CLIC3     | Hs.64746  | chloride intracellular channel 3                                     | Homo sapiens chloride intracellular channel 3 (CLIC3), mRNA [NM_004669]                                                                                                                         | 2.67958 | down | 2.70641 | down | 549.24970   | 1523.94900  | 533.28420   | 1272.67660  | Detected    | Detected    | Detected    | Detected |
| 5906 | A_23_P76350   | GNB3      | Hs.631657 | guanine nucleotide binding protein (G protein), beta polypeptide 3   | Homo sapiens guanine nucleotide binding protein (G protein), beta polypeptide 3 (GNB3), mRNA [NM_002075]                                                                                        | 2.67954 | down | 2.18385 | down | 282.53120   | 783.89740   | 64.16455    | 123.56165   | Detected    | Detected    | Detected    | Detected |
| 5907 | A_23_P136886  | APOOL     | Hs.706885 | apolipoprotein O-like                                                | Homo sapiens apolipoprotein O-like (APOOL), mRNA [NM_198450]                                                                                                                                    | 2.67786 | down | 2.53590 | down | 69.09710    | 191.59320   | 72.28335    | 161.63518   | Detected    | Detected    | Detected    | Detected |
| 5908 | A_23_P162171  | MCAM      | Hs.599039 | melanoma cell adhesion molecule                                      | Homo sapiens melanoma cell adhesion molecule (MCAM), mRNA [NM_006500]                                                                                                                           | 2.67744 | down | 2.66438 | down | 797.15200   | 2210.00900  | 626.63226   | 1472.22620  | Detected    | Detected    | Detected    | Detected |
| 5909 | A_23_P430658  | HEYL      | Hs.472566 | hairly/enhancer-of-split related with YRPW motif-like                | Homo sapiens hairy/enhancer-of-split related with YRPW motif-like (HEYL), mRNA [NM_014571]                                                                                                      | 2.67656 | down | 2.38577 | down | 160.08390   | 443.66833   | 207.89192   | 437.35190   | Detected    | Detected    | Detected    | Detected |
| 5910 | A_23_P207766  | ARHGDI A  | Hs.159161 | Rho GDP dissociation inhibitor (GDI) alpha                           | Homo sapiens Rho GDP dissociation inhibitor (GDI) alpha (ARHGDI A), mRNA [NM_004309]                                                                                                            | 2.67376 | down | 2.83762 | down | 2698.96480  | 7472.26860  | 3024.73000  | 7568.43550  | Detected    | Detected    | Detected    | Detected |
| 5911 | A_23_P93823   | RFC2      | Hs.647062 | replication factor C (activator 1) 2, 40kDa                          | Homo sapiens replication factor C (activator 1) 2, 40kDa (RFC2), transcript variant 1, mRNA [NM_181471]                                                                                         | 2.67289 | down | 2.60171 | down | 1035.79470  | 2866.73780  | 789.49396   | 1811.22990  | Detected    | Detected    | Detected    | Detected |
| 5912 | A_23_P128744  | BDKRB1    | Hs.525572 | bradykinin receptor B1                                               | Homo sapiens bradykinin receptor B1 (BDKRB1), mRNA [NM_000710]                                                                                                                                  | 2.67207 | down | 2.85950 | down | 336.64770   | 931.44210   | 293.69530   | 740.54620   | Detected    | Detected    | Detected    | Detected |
| 5913 | A_23_P203255  | API5      | Hs.435771 | apoptosis inhibitor 5                                                | Homo sapiens apoptosis inhibitor 5 (API5), transcript variant 2, mRNA [NM_006595]                                                                                                               | 2.67200 | down | 2.48771 | down | 198.85117   | 550.17194   | 205.20730   | 450.15073   | Detected    | Detected    | Detected    | Detected |
| 5914 | A_33_P3292860 |           | Hs.377070 |                                                                      | Glutamate receptor 3 Precursor (GluR-3)(GluR-C)(GluR-K3)(Glutamate receptor ionotropic, AMPA 3)(AMPA-selective glutamate receptor 3) [Source:UniProtKB/Swiss-Prot;Acc:P42263] [ENST00000335161] | 2.66912 | down | 3.18850 | down | 96.61571    | 267.02325   | 103.32034   | 290.49475   | Detected    | Detected    | Detected    | Detected |
| 5915 | A_33_P3703637 | LOC285300 | Hs.638436 | hypothetical protein LOC285300                                       | Homo sapiens cDNA FLJ38336 fis, clone FCBBF3026678 [AK095655]                                                                                                                                   | 2.66779 | down | 2.31183 | down | 284.20280   | 785.07820   | 179.70844   | 366.34530   | Detected    | Detected    | Detected    | Detected |
| 5916 | A_32_P191859  | SETD8     | Hs.443735 | SET domain containing (lysine methyltransferase) 8                   | Homo sapiens SET domain containing (lysine methyltransferase) 8 (SETD8), mRNA [NM_020382]                                                                                                       | 2.66736 | down | 3.68469 | down | 264.90700   | 731.65780   | 184.79523   | 600.42260   | Detected    | Detected    | Detected    | Detected |
| 5917 | A_33_P3395219 | C1orf118  | Hs.632414 | chromosome 1 open reading frame 118                                  | PREDICTED: Homo sapiens chromosome 1 open reading frame 118 (C1orf118), miscRNA [XR_041259]                                                                                                     | 2.66669 | down | 4.10713 | down | 51.74421    | 142.87856   | 32.09981    | 116.25349   | Detected    | Detected    | Detected    | Detected |
| 5918 | A_24_P647682  | LOC442308 |           | similar to tubulin, beta 5                                           | Homo sapiens similar to tubulin, beta 5 (LOC442308), non-coding RNA [NR_003598]                                                                                                                 | 2.66520 | down | 3.21971 | down | 3568.25600  | 9847.33200  | 1728.59420  | 4907.66260  | Detected    | Detected    | Detected    | Detected |
| 5919 | A_23_P319719  | PGAM5     | Hs.102558 | phosphoglycerate mutase family member 5                              | Homo sapiens phosphoglycerate mutase family member 5 (PGAM5), mRNA [NM_138575]                                                                                                                  | 2.66464 | down | 3.15127 | down | 160.68784   | 443.35846   | 205.26537   | 570.38275   | Detected    | Detected    | Detected    | Detected |
| 5920 | A_23_P89981   | CYP2F1    | Hs.558318 | cytochrome P450, family 2, subfamily F, polypeptide 1                | Homo sapiens cytochrome P450, family 2, subfamily F, polypeptide 1 (CYP2F1), mRNA [NM_000774]                                                                                                   | 2.66406 | down | 1.27286 | down | 5.51846     | 15.22285    | 20.69836    | 23.23175    | Compromised | Compromised | Detected    | Detected |
| 5921 | A_23_P205007  | IPO5      | Hs.712598 | importin 5                                                           | Homo sapiens importin 5 (IPO5), mRNA [NM_002271]                                                                                                                                                | 2.66356 | down | 2.86958 | down | 955.10850   | 2634.19920  | 663.09015   | 1677.86390  | Detected    | Detected    | Detected    | Detected |
| 5922 | A_23_P140256  | NP        | Hs.75514  | nucleoside phosphorylase                                             | Homo sapiens nucleoside phosphorylase (NP), mRNA [NM_000270]                                                                                                                                    | 2.66194 | down | 2.72696 | down | 11246.79100 | 30999.82400 | 11443.06100 | 27516.10500 | Detected    | Detected    | Detected    | Detected |
| 5923 | A_33_P3218559 |           |           |                                                                      |                                                                                                                                                                                                 | 2.66073 | down | 2.82347 | down | 209.70630   | 577.75750   | 210.61563   | 524.37195   | Detected    | Detected    | Detected    | Detected |
| 5924 | A_33_P3268378 | FAM167A   | Hs.124299 | family with sequence similarity 167, member A                        | Homo sapiens family with sequence similarity 167, member A (FAM167A), mRNA [NM_053279]                                                                                                          | 2.66018 | down | 3.30729 | down | 96.10974    | 264.73526   | 82.97532    | 241.98425   | Detected    | Detected    | Detected    | Detected |
| 5925 | A_23_P53663   | PAWR      | Hs.643130 | PRKC, apoptosis, WT1, regulator                                      | Homo sapiens PRKC, apoptosis, WT1, regulator (PAWR), mRNA [NM_002583]                                                                                                                           | 2.65962 | down | 2.93462 | down | 322.41180   | 887.90060   | 206.29155   | 533.82520   | Detected    | Detected    | Detected    | Detected |
| 5926 | A_33_P3347132 | EXOSC2    | Hs.654643 | exosome component 2                                                  | Homo sapiens exosome component 2 (EXOSC2), mRNA [NM_014285]                                                                                                                                     | 2.65867 | down | 2.78693 | down | 545.13306   | 1500.72020  | 468.58923   | 1151.55290  | Detected    | Detected    | Detected    | Detected |
| 5927 | A_23_P136817  | KNTC1     | Hs.300559 | kinetochore associated 1                                             | Homo sapiens kinetochore associated 1 (KNTC1), mRNA [NM_014708]                                                                                                                                 | 2.65720 | down | 2.60587 | down | 281.84804   | 774.93317   | 195.76562   | 449.83630   | Detected    | Detected    | Detected    | Detected |
| 5928 | A_32_P167904  | ZNF681    | Hs.399952 | zinc finger protein 681                                              | Homo sapiens zinc finger protein 681 (ZNF681), mRNA [NM_138286]                                                                                                                                 | 2.65628 | down | 3.59713 | down | 17.96584    | 49.41458    | 9.35550     | 29.67488    | Detected    | Detected    | Compromised | Detected |
| 5929 | A_33_P3236986 |           |           |                                                                      |                                                                                                                                                                                                 | 2.65593 | down | 1.87418 | down | 161.91590   | 445.28610   | 95.32117    | 157.53099   | Detected    | Detected    | Detected    | Detected |
| 5930 | A_33_P3214052 |           |           |                                                                      |                                                                                                                                                                                                 | 2.65588 | down | 3.93641 | down | 81.36021    | 223.74516   | 18.90440    | 65.61891    | Detected    | Detected    | Detected    | Detected |

|      |               |            |           |                                                                               |                                                                                                                                        |         |      |         |      |             |              |             |              |             |             |             |             |
|------|---------------|------------|-----------|-------------------------------------------------------------------------------|----------------------------------------------------------------------------------------------------------------------------------------|---------|------|---------|------|-------------|--------------|-------------|--------------|-------------|-------------|-------------|-------------|
| 5931 | A_24_P75920   | CCDC159    | Hs.631636 | coiled-coil domain containing 159                                             | Homo sapiens coiled-coil domain containing 159 (CCDC159), mRNA [NM_001080503]                                                          | 2.65497 | down | 2.65118 | down | 41.12437    | 113.05578    | 45.85074    | 107.18938    | Detected    | Detected    | Detected    | Detected    |
| 5932 | A_33_P3214446 | RFC3       | Hs.115474 | replication factor C (activator 1) 3, 38kDa                                   | Homo sapiens replication factor C (activator 1) 3, 38kDa (RFC3), transcript variant 2, mRNA [NM_181558]                                | 2.65489 | down | 2.81465 | down | 192.49675   | 529.17975    | 189.32380   | 469.88892    | Detected    | Detected    | Detected    | Detected    |
| 5933 | A_33_P3307207 | PRHOXNB    | Hs.705356 | parahox cluster neighbor                                                      | Homo sapiens parahox cluster neighbor (PRHOXNB), mRNA [NM_001105577]                                                                   | 2.65296 | down | 1.89534 | down | 7.13840     | 19.60943     | 4.52733     | 7.56650      | Compromised | Detected    | Compromised | Compromised |
| 5934 | A_24_P58620   | GRAMD1B    | Hs.144725 | GRAM domain containing 1B                                                     | Homo sapiens GRAM domain containing 1B (GRAMD1B), mRNA [NM_020716]                                                                     | 2.64961 | down | 2.84049 | down | 58.04118    | 159.23955    | 46.23160    | 115.79726    | Detected    | Detected    | Detected    | Detected    |
| 5935 | A_23_P372096  |            | Hs.516978 |                                                                               | Uncharacterized protein C20orf112 [Source:UniProtKB/Swiss-Prot;Acc:Q96MY1] [ENST00000375678]                                           | 2.64949 | down | 2.82026 | down | 82.57635    | 226.54326    | 67.42421    | 167.67569    | Detected    | Detected    | Detected    | Detected    |
| 5936 | A_33_P3273255 |            |           |                                                                               | Zinc finger protein 761 [Source:UniProtKB/Swiss-Prot;Acc:Q86XN6] [ENST00000396407]                                                     | 2.64908 | down | 2.12562 | down | 30.57966    | 83.88039     | 20.52007    | 38.46174     | Detected    | Detected    | Detected    | Detected    |
| 5937 | A_33_P3412945 | SFRS2      | Hs.713672 | splicing factor, arginine/serine-rich 2                                       | Homo sapiens splicing factor, arginine/serine-rich 2 (SFRS2), mRNA [NM_003016]                                                         | 2.64841 | down | 2.59092 | down | 1252.03080  | 3433.46850   | 1524.02450  | 3481.86160   | Detected    | Detected    | Detected    | Detected    |
| 5938 | A_23_P11025   | ZNF185     | Hs.16622  | zinc finger protein 185 (LIM domain)                                          | Homo sapiens zinc finger protein 185 (LIM domain) (ZNF185), mRNA [NM_007150]                                                           | 2.64838 | down | 2.58630 | down | 440.92180   | 1209.13490   | 299.68650   | 683.45850    | Detected    | Detected    | Detected    | Detected    |
| 5939 | A_33_P3297621 | KIAA0090   | Hs.439200 | KIAA0090                                                                      | Homo sapiens KIAA0090 (KIAA0090), mRNA [NM_015047]                                                                                     | 2.64804 | down | 2.67767 | down | 870.75140   | 2387.55030   | 976.24530   | 2305.05700   | Detected    | Detected    | Detected    | Detected    |
| 5940 | A_33_P3419835 | NCRNA00095 |           | non-protein coding RNA 95                                                     | Homo sapiens non-protein coding RNA 95 (NCRNA00095), non-coding RNA [NR_024348]                                                        | 2.64703 | down | 2.64743 | down | 30.31763    | 83.09737     | 14.38931    | 33.59155     | Detected    | Detected    | Detected    | Detected    |
| 5941 | A_33_P3312301 | CIT        | Hs.119594 | citron (rho-interacting, serine/threonine kinase 21)                          | Homo sapiens citron (rho-interacting, serine/threonine kinase 21) (CIT), mRNA [NM_007174]                                              | 2.64621 | down | 3.09760 | down | 29.92613    | 81.99886     | 24.27054    | 66.29330     | Detected    | Detected    | Detected    | Detected    |
| 5942 | A_33_P3247678 |            |           |                                                                               |                                                                                                                                        | 2.64555 | down | 3.08440 | down | 85.74915    | 234.89778    | 29.60079    | 80.50803     | Detected    | Detected    | Detected    | Detected    |
| 5943 | A_32_P2634    |            | Hs.661155 |                                                                               | full-length cDNA clone CS0D1009Y001 of Placenta Cot 25-normalized of Homo sapiens (human) [CR604707]                                   | 2.64481 | down | 2.86427 | down | 167.67015   | 459.18076    | 166.35510   | 420.16086    | Detected    | Detected    | Detected    | Detected    |
| 5944 | A_23_P92948   | PRRC1      | Hs.483259 | proline-rich coiled-coil 1                                                    | Homo sapiens proline-rich coiled-coil 1 (PRRC1), mRNA [NM_130809]                                                                      | 2.64412 | down | 2.54792 | down | 392.12130   | 1073.58180   | 429.81100   | 965.67050    | Detected    | Detected    | Detected    | Detected    |
| 5945 | A_33_P3409210 |            | Hs.710582 |                                                                               | cDNA FLJ44654 fis. clone BRACE2047232 [Source:UniProtKB/TrEMBL;Acc:Q6ZTH3] [ENST00000433265]                                           | 2.64286 | down | 3.18565 | down | 104.31122   | 285.45505    | 88.91026    | 249.75607    | Detected    | Detected    | Detected    | Detected    |
| 5946 | A_24_P47547   | RAN        | Hs.10842  | RAN, member RAS oncogene family                                               | Homo sapiens RAN, member RAS oncogene family (RAN), mRNA [NM_006325]                                                                   | 2.64278 | down | 2.72293 | down | 7879.93400  | 21563.35000  | 6987.78000  | 16778.05000  | Detected    | Detected    | Detected    | Detected    |
| 5947 | A_23_P57277   | C21orf7    | Hs.222802 | chromosome 21 open reading frame 7                                            | Homo sapiens chromosome 21 open reading frame 7 (C21orf7), mRNA [NM_020152]                                                            | 2.64158 | down | 2.71501 | down | 166.53125   | 455.50458    | 130.44699   | 312.29984    | Detected    | Detected    | Detected    | Detected    |
| 5948 | A_23_P121215  | CAMK1      | Hs.434875 | calcium/calmodulin-dependent protein kinase I                                 | Homo sapiens calcium/calmodulin-dependent protein kinase I (CAMK1), mRNA [NM_003656]                                                   | 2.64103 | down | 2.86905 | down | 163.10564   | 446.04205    | 154.01813   | 389.65110    | Detected    | Detected    | Detected    | Detected    |
| 5949 | A_24_P253003  | WNT11      | Hs.108219 | wingless-type MMTV integration site family, member 11                         | Homo sapiens wingless-type MMTV integration site family, member 11 (WNT11), mRNA [NM_004626]                                           | 2.63940 | down | 3.29054 | down | 18.52752    | 50.63562     | 12.98368    | 37.67300     | Detected    | Detected    | Compromised | Detected    |
| 5950 | A_23_P206441  | FANCA      | Hs.719210 | Fanconi anemia, complementation group A                                       | Homo sapiens Fanconi anemia, complementation group A (FANCA), transcript variant 1, mRNA [NM_000135]                                   | 2.63804 | down | 2.60541 | down | 193.04425   | 527.31616    | 146.39120   | 336.32297    | Detected    | Detected    | Detected    | Detected    |
| 5951 | A_23_P132378  | CELSR1     | Hs.252387 | cadherin, EGF LAG seven-pass G-type receptor 1 (flamingo homolog, Drosophila) | Homo sapiens cadherin, EGF LAG seven-pass G-type receptor 1 (flamingo homolog, Drosophila) (CELSR1), mRNA [NM_014246]                  | 2.63780 | down | 7.09151 | down | 2.48877     | 6.79767      | 3.18415     | 19.91119     | Compromised | Compromised | Compromised | Detected    |
| 5952 | A_33_P3413325 |            | Hs.144795 |                                                                               | Homo sapiens mRNA: cDNA DKFZp781N1049 (from clone DKFZp781N1049). [CR627384]                                                           | 2.63662 | down | 5.00199 | down | 20.38964    | 55.66606     | 12.78259    | 56.38030     | Detected    | Detected    | Compromised | Detected    |
| 5953 | A_24_P305764  | SMS        | Hs.288487 | spermine synthase                                                             | Homo sapiens spermine synthase (SMS), mRNA [NM_004595]                                                                                 | 2.63511 | down | 2.52527 | down | 5591.95750  | 15257.95500  | 4541.58200  | 10113.02800  | Detected    | Detected    | Detected    | Detected    |
| 5954 | A_23_P7976    | HIST1H1E   | Hs.248133 | histone cluster 1, H1e                                                        | Homo sapiens histone cluster 1, H1e (HIST1H1E), mRNA [NM_005321]                                                                       | 2.63367 | down | 2.16303 | down | 412.17242   | 1124.01700   | 418.38818   | 798.00920    | Detected    | Detected    | Detected    | Detected    |
| 5955 | A_33_P3228612 | CACNA1E    | Hs.437444 | calcium channel, voltage-dependent, R type, alpha 1E subunit                  | Homo sapiens calcium channel, voltage-dependent, R type, alpha 1E subunit (CACNA1E), mRNA [NM_000721]                                  | 2.63257 | down | 4.63322 | down | 7.61690     | 20.76307     | 2.54779     | 10.40906     | Compromised | Detected    | Compromised | Compromised |
| 5956 | A_33_P3295358 | ANGPTL4    | Hs.9613   | angiopoietin-like 4                                                           | Homo sapiens angiopoietin-like 4 (ANGPTL4), transcript variant 1, mRNA [NM_139314]                                                     | 2.63048 | down | 2.60556 | down | 50708.93800 | 138118.80000 | 46730.95000 | 107367.25000 | Detected    | Detected    | Detected    | Detected    |
| 5957 | A_24_P282309  | MYOF       | Hs.602086 | myoferlin                                                                     | Homo sapiens myoferlin (MYOF), transcript variant 2, mRNA [NM_133337]                                                                  | 2.62864 | down | 2.90892 | down | 156.00873   | 424.63310    | 152.63959   | 391.52920    | Detected    | Detected    | Detected    | Detected    |
| 5958 | A_33_P3396607 | UGDH       | Hs.572518 | UDP-glucose dehydrogenase                                                     | Homo sapiens UDP-glucose dehydrogenase (UGDH), mRNA [NM_003359]                                                                        | 2.62850 | down | 2.60108 | down | 4881.67140  | 13286.46800  | 3032.67820  | 6955.77300   | Detected    | Detected    | Detected    | Detected    |
| 5959 | A_24_P107291  | PPP2R1B    | Hs.584790 | protein phosphatase 2 (formerly 2A), regulatory subunit A, beta isoform       | Homo sapiens protein phosphatase 2 (formerly 2A), regulatory subunit A, beta isoform (PPP2R1B), transcript variant 2, mRNA [NM_181699] | 2.62670 | down | 2.46625 | down | 656.48610   | 1785.53920   | 549.33685   | 1194.65220   | Detected    | Detected    | Detected    | Detected    |
| 5960 | A_33_P3233774 | ZNF174     | Hs.155204 | zinc finger protein 174                                                       | Homo sapiens zinc finger protein 174 (ZNF174), transcript variant 2, mRNA [NM_001032292]                                               | 2.62663 | down | 2.55470 | down | 169.83708   | 461.91736    | 148.52484   | 334.58337    | Detected    | Detected    | Detected    | Detected    |



|      |                |              |           |                                                                              |                                                                                                                                                                     |         |      |         |      |              |              |             |              |             |             |             |             |
|------|----------------|--------------|-----------|------------------------------------------------------------------------------|---------------------------------------------------------------------------------------------------------------------------------------------------------------------|---------|------|---------|------|--------------|--------------|-------------|--------------|-------------|-------------|-------------|-------------|
| 5961 | A_24_P319715   | PDIA6        | Hs.212102 | protein disulfide isomerase family A, member 6                               | Homo sapiens protein disulfide isomerase family A, member 6 (PDIA6), mRNA [NM_005742]                                                                               | 2.62543 | down | 2.81440 | down | 5827.30700   | 15841.68300  | 6830.06800  | 16950.27100  | Detected    | Detected    | Detected    | Detected    |
| 5962 | A_33_P3234855  | UTRN         | Hs.133135 | utrophin                                                                     | Homo sapiens utrophin (UTRN), mRNA [NM_007124]                                                                                                                      | 2.62263 | down | 1.30358 | down | 12.94645     | 35.15774     | 10.23947    | 11.77011     | Compromised | Detected    | Compromised | Compromised |
| 5963 | A_33_P3409289  |              |           |                                                                              |                                                                                                                                                                     | 2.62090 | down | 2.38950 | down | 153.57532    | 416.77777    | 93.20488    | 196.38590    | Detected    | Detected    | Detected    | Detected    |
| 5964 | A_33_P3238415  | GSG1         | Hs.240053 | germ cell associated 1                                                       | Homo sapiens germ cell associated 1 (GSG1), transcript variant 3, mRNA [NM_001080554]                                                                               | 2.62081 | down | 2.44940 | down | 91.68673     | 248.81383    | 79.88535    | 172.54080    | Detected    | Detected    | Detected    | Detected    |
| 5965 | A_23_P46924    | BUB3         | Hs.418533 | budding uninhibited by benzimidazoles 3 homolog (yeast)                      | Homo sapiens budding uninhibited by benzimidazoles 3 homolog (yeast) (BUB3), transcript variant 2, mRNA [NM_001007793]                                              | 2.62042 | down | 2.69069 | down | 3012.27900   | 8173.33900   | 2417.19730  | 5735.10160   | Detected    | Detected    | Detected    | Detected    |
| 5966 | A_33_P3344276  | HS1BP3       | Hs.531785 | HCLS1 binding protein 3                                                      | Homo sapiens HCLS1 binding protein 3 (HS1BP3), mRNA [NM_022460]                                                                                                     | 2.61951 | down | 3.62829 | down | 71.70268     | 194.48598    | 60.07006    | 192.18785    | Detected    | Detected    | Detected    | Detected    |
| 5967 | A_23_P80040    | PROCR        | Hs.647450 | protein C receptor, endothelial (EPCR)                                       | Homo sapiens protein C receptor, endothelial (EPCR) (PROCR), mRNA [NM_006404]                                                                                       | 2.61630 | down | 2.53215 | down | 3514.12940   | 9520.03400   | 3114.87920  | 6954.97750   | Detected    | Detected    | Detected    | Detected    |
| 5968 | A_33_P3357580  | MRT04        | Hs.463797 | mRNA turnover 4 homolog (S. cerevisiae)                                      | Homo sapiens mRNA turnover 4 homolog (S. cerevisiae) (MRT04), mRNA [NM_016183]                                                                                      | 2.61622 | down | 2.30562 | down | 661.24520    | 1791.30600   | 442.33154   | 899.29380    | Detected    | Detected    | Detected    | Detected    |
| 5969 | A_23_P256244   |              | Hs.148778 |                                                                              | Oxidation resistance protein 1 [Source:UniProtKB/Swiss-Prot;acc:Q8H573] [ENST00000395828]                                                                           | 2.61344 | down | 2.67399 | down | 65.98434     | 178.56082    | 55.19980    | 130.15552    | Detected    | Detected    | Detected    | Detected    |
| 5970 | A_33_P3296198  | FLJ44606     | Hs.601507 | glutaredoxin-like protein YDR286C homolog                                    | Homo sapiens glutaredoxin-like protein YDR286C homolog (FLJ44606), transcript variant 1, mRNA [NM_001164479]                                                        | 2.61250 | down | 4.31138 | down | 134729.94000 | 364463.38000 | 72000.98000 | 273728.40000 | Detected    | Detected    | Detected    | Detected    |
| 5971 | A_33_P3389133  | MINPP1       | Hs.121260 | multiple inositol polyphosphate histidine phosphatase, 1                     | Homo sapiens multiple inositol polyphosphate histidine phosphatase, 1 (MINPP1), mRNA [NM_004897]                                                                    | 2.61246 | down | 2.37971 | down | 116.85526    | 316.10483    | 123.97292   | 260.14520    | Detected    | Detected    | Detected    | Detected    |
| 5972 | A_33_P3320888  | CREB3L2      | Hs.490273 | cAMP responsive element binding protein 3-like 2                             | Homo sapiens cAMP responsive element binding protein 3-like 2 (CREB3L2), mRNA [NM_194071]                                                                           | 2.61145 | down | 2.94983 | down | 205.45256    | 555.55480    | 223.79634   | 582.12470    | Detected    | Detected    | Detected    | Detected    |
| 5973 | A_23_P17275    | DNAJC27      | Hs.434993 | DnaJ (Hsp40) homolog, subfamily C, member 27                                 | Homo sapiens DnaJ (Hsp40) homolog, subfamily C, member 27 (DNAJC27), mRNA [NM_016544]                                                                               | 2.61063 | down | 2.86134 | down | 48.42781     | 130.90993    | 42.02477    | 106.03298    | Detected    | Detected    | Detected    | Detected    |
| 5974 | A_33_P3238201  | LOC100131315 | Hs.610545 | similar to hCG1796212                                                        | PREDICTED: Homo sapiens similar to hCG1796212 (LOC100131315), mRNA [XM_001716753]                                                                                   | 2.61047 | down | 2.95184 | down | 41.27333     | 111.56348    | 32.55874    | 84.74739     | Detected    | Detected    | Detected    | Detected    |
| 5975 | A_33_P3233947  | FAM36A       | Hs.657313 | family with sequence similarity 36, member A                                 | Homo sapiens family with sequence similarity 36, member A (FAM36A), mRNA [NM_198076]                                                                                | 2.60675 | down | 2.68522 | down | 2443.26680   | 6594.82400   | 1404.97840  | 3326.71260   | Detected    | Detected    | Detected    | Detected    |
| 5976 | A_33_P3300395  | APITD1       | Hs.412311 | apoptosis-inducing, TAF9-like domain 1                                       | Homo sapiens apoptosis-inducing, TAF9-like domain 1 (APITD1), transcript variant B, mRNA [NM_199295]                                                                | 2.60651 | down | 2.55178 | down | 1443.39430   | 3895.62230   | 1291.44980  | 2905.94210   | Detected    | Detected    | Detected    | Detected    |
| 5977 | A_23_P204801   | SLC41A2      | Hs.577463 | solute carrier family 41, member 2                                           | Homo sapiens solute carrier family 41, member 2 (SLC41A2), mRNA [NM_032148]                                                                                         | 2.60453 | down | 2.59265 | down | 117.18940    | 316.04675    | 100.55089   | 229.87710    | Detected    | Detected    | Detected    | Detected    |
| 5978 | A_23_P136504   | SLC25A21     | Hs.693866 | solute carrier family 25 (mitochondrial oxodicarboxylate carrier), member 21 | Homo sapiens solute carrier family 25 (mitochondrial oxodicarboxylate carrier), member 21 (SLC25A21), nuclear gene encoding mitochondrial protein, mRNA [NM_030631] | 2.60423 | down | 2.00279 | down | 9.90348      | 26.70546     | 10.47143    | 18.49300     | Compromised | Detected    | Compromised | Detected    |
| 5979 | A_23_P30813    | HIST1H4K     | Hs.528055 | histone cluster 1, H4k                                                       | Homo sapiens histone cluster 1, H4k (HIST1H4K), mRNA [NM_003541]                                                                                                    | 2.60420 | down | 2.78916 | down | 370.00443    | 997.73310    | 299.06192   | 735.52893    | Detected    | Detected    | Detected    | Detected    |
| 5980 | A_33_P33343485 |              | Hs.674397 |                                                                              | Homo sapiens clone DNA108759 PIKR2786 (UNQ2786) mRNA, complete cds. [AY358103]                                                                                      | 2.60251 | down | 3.17007 | down | 213.63188    | 575.69270    | 166.71701   | 466.03024    | Detected    | Detected    | Detected    | Detected    |
| 5981 | A_33_P3407103  | YTHDF1       | Hs.11747  | YTH domain family, member 1                                                  | Homo sapiens YTH domain family, member 1 (YTHDF1), mRNA [NM_017796]                                                                                                 | 2.60200 | down | 2.57553 | down | 32.37426     | 87.22479     | 37.54954    | 85.27808     | Detected    | Detected    | Detected    | Detected    |
| 5982 | A_33_P3232516  | KIF18B       | Hs.135094 | kinesin family member 18B                                                    | Homo sapiens kinesin family member 18B (KIF18B), mRNA [NM_001080443]                                                                                                | 2.60163 | down | 2.19999 | down | 6.68345      | 18.00443     | 10.57910    | 20.52276     | Compromised | Compromised | Compromised | Detected    |
| 5983 | A_23_P119362   | EMP3         | Hs.9999   | epithelial membrane protein 3                                                | Homo sapiens epithelial membrane protein 3 (EMP3), mRNA [NM_001425]                                                                                                 | 2.59980 | down | 2.78355 | down | 6815.04100   | 18346.03100  | 10205.37400 | 25049.20700  | Detected    | Detected    | Detected    | Detected    |
| 5984 | A_23_P100486   | VKORC1       | Hs.324844 | vitamin K epoxide reductase complex, subunit 1                               | Homo sapiens vitamin K epoxide reductase complex, subunit 1 (VKORC1), transcript variant 2, mRNA [NM_206824]                                                        | 2.59831 | down | 2.75368 | down | 14198.68300  | 38200.77700  | 16229.88700 | 39408.96500  | Detected    | Detected    | Detected    | Detected    |
| 5985 | A_24_P133488   | CDC44        | Hs.34045  | cell division cycle associated 4                                             | Homo sapiens cell division cycle associated 4 (CDC44), transcript variant 1, mRNA [NM_017955]                                                                       | 2.59671 | down | 2.64167 | down | 153.17271    | 411.84833    | 111.15553   | 258.92590    | Detected    | Detected    | Detected    | Detected    |
| 5986 | A_24_P358146   | LOC100129478 |           | hypothetical LOC100129478                                                    | PREDICTED: Homo sapiens hypothetical LOC100129478 (LOC100129478), mRNA [XM_001719774]                                                                               | 2.59661 | down | 2.75606 | down | 26.56233     | 71.41779     | 32.07050    | 77.93993     | Detected    | Detected    | Detected    | Detected    |
| 5987 | A_23_P80839    | MAP6D1       | Hs.478465 | MAP6 domain containing 1                                                     | Homo sapiens MAP6 domain containing 1 (MAP6D1), mRNA [NM_024871]                                                                                                    | 2.59631 | down | 2.45883 | down | 679.18260    | 1825.89820   | 636.15155   | 1379.28930   | Detected    | Detected    | Detected    | Detected    |
| 5988 | A_23_P70318    | ENPP4        | Hs.643497 | ectonucleotide pyrophosphatase/phosphodiesterase 4 (putative function)       | Homo sapiens ectonucleotide pyrophosphatase/phosphodiesterase 4 (putative function) (ENPP4), mRNA [NM_014936]                                                       | 2.59541 | down | 2.97615 | down | 303.78067    | 816.39435    | 200.24220   | 525.50420    | Detected    | Detected    | Detected    | Detected    |
| 5989 | A_33_P3356092  | BTBD9        | Hs.603858 | BTB (POZ) domain containing 9                                                | Homo sapiens BTB (POZ) domain containing 9 (BTBD9), transcript variant 1, mRNA [NM_052893]                                                                          | 2.59357 | down | 2.19241 | down | 6.61973      | 17.77756     | 6.10343     | 11.79946     | Compromised | Detected    | Compromised | Compromised |
| 5990 | A_24_P73669    | GSPT1        | Hs.528780 | G1 to S phase transition 1                                                   | Homo sapiens G1 to S phase transition 1 (GSPT1), transcript variant 1, mRNA [NM_002094]                                                                             | 2.59302 | down | 2.67098 | down | 807.27190    | 2167.50200   | 718.55110   | 1692.36490   | Detected    | Detected    | Detected    | Detected    |

|      |               |           |           |                                               |                                                                                                                                                                            |         |      |         |      |             |             |             |             |             |          |             |             |
|------|---------------|-----------|-----------|-----------------------------------------------|----------------------------------------------------------------------------------------------------------------------------------------------------------------------------|---------|------|---------|------|-------------|-------------|-------------|-------------|-------------|----------|-------------|-------------|
| 5991 | A_33_P3212804 | C22orf42  | Hs.426551 | chromosome 22 open reading frame 42           | Homo sapiens chromosome 22 open reading frame 42 (C22orf42), mRNA [NM_001010839]                                                                                           | 2.59291 | down | 1.48906 | down | 16.78405    | 45.06262    | 10.48611    | 13.76863    | Detected    | Detected | Compromised | Compromised |
| 5992 | A_33_P3224705 |           |           |                                               | Pecanex-like protein C14orf135 (Hepatitis C virus F protein-binding protein 2)(HCV F protein-binding protein 2) [Source:UniProtKB/Swiss-Prot;Acc:Q63HM2] [ENST00000391611] | 2.59247 | down | 2.85051 | down | 2238.66480  | 6009.47560  | 1818.78970  | 4571.62450  | Detected    | Detected | Detected    | Detected    |
| 5993 | A_23_P150852  | ESYT1     | Hs.632729 | extended synaptotagmin-like protein 1         | Homo sapiens extended synaptotagmin-like protein 1 (ESYT1), mRNA [NM_015292]                                                                                               | 2.59188 | down | 2.79078 | down | 2848.98730  | 7646.06740  | 2399.23270  | 5904.23540  | Detected    | Detected | Detected    | Detected    |
| 5994 | A_23_P160968  | LAMC2     | Hs.591484 | laminin, gamma 2                              | Homo sapiens laminin, gamma 2 (LAMC2), transcript variant 2, mRNA [NM_018891]                                                                                              | 2.59057 | down | 2.96437 | down | 246.36859   | 660.86540   | 192.93906   | 504.33353   | Detected    | Detected | Detected    | Detected    |
| 5995 | A_23_P218456  | ILF3      | Hs.465885 | interleukin enhancer binding factor 3, 90kDa  | Homo sapiens interleukin enhancer binding factor 3, 90kDa (ILF3), transcript variant 1, mRNA [NM_012218]                                                                   | 2.58977 | down | 2.65395 | down | 1930.40800  | 5176.58450  | 1607.09020  | 3760.96300  | Detected    | Detected | Detected    | Detected    |
| 5996 | A_23_P79259   | SH3BP4    | Hs.516777 | SH3-domain binding protein 4                  | Homo sapiens SH3-domain binding protein 4 (SH3BP4), mRNA [NM_014521]                                                                                                       | 2.58702 | down | 2.76464 | down | 970.94543   | 2600.92750  | 762.42740   | 1858.67130  | Detected    | Detected | Detected    | Detected    |
| 5997 | A_32_P9575    | MRPL45    | Hs.462913 | mitochondrial ribosomal protein L45           | Homo sapiens mitochondrial ribosomal protein L45 (MRPL45), nuclear gene encoding mitochondrial protein, mRNA [NM_023251]                                                   | 2.58639 | down | 2.60729 | down | 665.59460   | 1782.52950  | 734.00040   | 1687.52660  | Detected    | Detected | Detected    | Detected    |
| 5998 | A_23_P56404   | EN1       | Hs.271977 | engrailed homeobox 1                          | Homo sapiens engrailed homeobox 1 (EN1), mRNA [NM_001426]                                                                                                                  | 2.58500 | down | 2.56550 | down | 309.96796   | 829.67993   | 291.47690   | 659.38916   | Detected    | Detected | Detected    | Detected    |
| 5999 | A_23_P41948   | CCDC99    | Hs.368710 | coiled-coil domain containing 99              | Homo sapiens coiled-coil domain containing 99 (CCDC99), mRNA [NM_017785]                                                                                                   | 2.58461 | down | 2.43875 | down | 1656.22790  | 4432.48830  | 1145.57760  | 2463.52300  | Detected    | Detected | Detected    | Detected    |
| 6000 | A_23_P302787  | LOC375295 | Hs.659070 | hypothetical protein LOC375295                | PREDICTED: Homo sapiens hypothetical protein LOC375295 (LOC375295), mRNA [XM_001716150]                                                                                    | 2.58284 | down | 2.29137 | down | 1065.05640  | 2848.41670  | 593.11487   | 1198.39260  | Detected    | Detected | Detected    | Detected    |
| 6001 | A_24_P194000  | SAE1      | Hs.515500 | SUMO1 activating enzyme subunit 1             | Homo sapiens SUMO1 activating enzyme subunit 1 (SAE1), transcript variant 1, mRNA [NM_005500]                                                                              | 2.58207 | down | 2.49707 | down | 17830.35000 | 47671.77700 | 13283.26300 | 29248.34200 | Detected    | Detected | Detected    | Detected    |
| 6002 | A_33_P3235562 |           | Hs.432760 |                                               | F-actin-capping protein subunit beta (CapZ beta) [Source:UniProtKB/Swiss-Prot;Acc:P47756] [ENST00000264202]                                                                | 2.57942 | down | 2.30826 | down | 24.00909    | 64.12550    | 23.93008    | 48.70724    | Detected    | Detected | Detected    | Detected    |
| 6003 | A_33_P3334448 | SNORA62   | Hs.449909 | small nucleolar RNA, H/ACA box 62             | Homo sapiens small nucleolar RNA, H/ACA box 62 (SNORA62), small nucleolar RNA [NR_002324]                                                                                  | 2.57805 | down | 2.65489 | down | 78.71155    | 210.11765   | 83.73945    | 196.03880   | Detected    | Detected | Detected    | Detected    |
| 6004 | A_23_P20443   | LZTS1     | Hs.521432 | leucine zipper, putative tumor suppressor 1   | Homo sapiens leucine zipper, putative tumor suppressor 1 (LZTS1), mRNA [NM_021020]                                                                                         | 2.57669 | down | 2.97464 | down | 81.49607    | 217.43610   | 48.01293    | 125.93827   | Detected    | Detected | Detected    | Detected    |
| 6005 | A_33_P383211  | DNA2      | Hs.532446 | DNA replication helicase 2 homolog (yeast)    | Homo sapiens DNA replication helicase 2 homolog (yeast) (DNA2), mRNA [NM_001080449]                                                                                        | 2.57640 | down | 2.73005 | down | 41.13052    | 109.72628   | 31.38795    | 75.56111    | Detected    | Detected | Detected    | Detected    |
| 6006 | A_23_P77993   | C1QL1     | Hs.134012 | complement component 1, q subcomponent-like 1 | Homo sapiens complement component 1, q subcomponent-like 1 (C1QL1), mRNA [NM_006688]                                                                                       | 2.57464 | down | 2.53150 | down | 16.33003    | 43.53473    | 20.28783    | 45.28758    | Detected    | Detected | Detected    | Detected    |
| 6007 | A_33_P3708309 | LOC285638 | Hs.532104 | hypothetical protein LOC285638                | Homo sapiens mRNA: cDNA DKFP667J236 (from clone DKFP667J236) [AL833206]                                                                                                    | 2.57330 | down | 1.86736 | down | 29.28161    | 78.02236    | 28.68316    | 47.23024    | Detected    | Detected | Detected    | Detected    |
| 6008 | A_23_P16469   | PLAUR     | Hs.466871 | plasminogen activator, urokinase receptor     | Homo sapiens plasminogen activator, urokinase receptor (PLAUR), transcript variant 3, mRNA [NM_001005377]                                                                  | 2.57317 | down | 2.70473 | down | 3130.33960  | 8340.53200  | 3909.75700  | 9324.80800  | Detected    | Detected | Detected    | Detected    |
| 6009 | A_24_P919452  | LOC729839 | Hs.661610 | similar to DTW domain containing 2            | PREDICTED: Homo sapiens similar to DTW domain containing 2 (LOC729839), miscRNA [XR_016021]                                                                                | 2.57229 | down | 2.12360 | down | 38.45179    | 102.41649   | 30.91932    | 57.89850    | Detected    | Detected | Detected    | Detected    |
| 6010 | A_33_P3235162 |           |           |                                               |                                                                                                                                                                            | 2.57213 | down | 2.37512 | down | 11.63942    | 30.99974    | 3.21604     | 6.73552     | Compromised | Detected | Compromised | Compromised |
| 6011 | A_24_P325520  | SORT1     | Hs.485195 | sortilin 1                                    | Homo sapiens sortilin 1 (SORT1), mRNA [NM_002959]                                                                                                                          | 2.57159 | down | 2.56935 | down | 440.65082   | 1173.35310  | 420.12308   | 951.84180   | Detected    | Detected | Detected    | Detected    |
| 6012 | A_33_P3362353 |           |           |                                               | A-Raf proto-oncogene serine/threonine-protein kinase (EC 2.7.11.1)(A-raf-1)(Proto-oncogene Pks) [Source:UniProtKB/Swiss-Prot;Acc:P10396] [ENST00000377039]                 | 2.56963 | down | 2.54010 | down | 335.57455   | 892.87933   | 292.41113   | 654.95386   | Detected    | Detected | Detected    | Detected    |
| 6013 | A_33_P3419733 | DNAJC5    | Hs.164419 | DnaJ (Hsp40) homolog, subfamily C, member 5   | Homo sapiens DnaJ (Hsp40) homolog, subfamily C, member 5 (DNAJC5), mRNA [NM_025219]                                                                                        | 2.56935 | down | 3.85332 | down | 243.85095   | 648.75410   | 186.64607   | 634.18994   | Detected    | Detected | Detected    | Detected    |
| 6014 | A_23_P17855   | TRIOBP    | Hs.533030 | TRIO and F-actin binding protein              | Homo sapiens TRIO and F-actin binding protein (TRIOBP), transcript variant 6, mRNA [NM_001039141]                                                                          | 2.56903 | down | 2.95952 | down | 3372.02050  | 8969.99700  | 3991.62900  | 10416.87500 | Detected    | Detected | Detected    | Detected    |
| 6015 | A_33_P3295108 | GANC      | Hs.143261 | glucosidase, alpha, neutral C                 | Homo sapiens glucosidase, alpha, neutral C (GANC), mRNA [NM_198141]                                                                                                        | 2.56755 | down | 2.64922 | down | 434.68410   | 1155.64780  | 293.03520   | 684.54724   | Detected    | Detected | Detected    | Detected    |
| 6016 | A_33_P3222783 | SURF4     | Hs.512465 | surfeit 4                                     | Homo sapiens surfeit 4 (SURF4), mRNA [NM_033161]                                                                                                                           | 2.56754 | down | 2.97036 | down | 1676.78830  | 4457.88800  | 1317.89900  | 3451.89280  | Detected    | Detected | Detected    | Detected    |
| 6017 | A_24_P4334    | RNF38     | Hs.333503 | ring finger protein 38                        | Homo sapiens ring finger protein 38 (RNF38), transcript variant 2, mRNA [NM_194328]                                                                                        | 2.56438 | down | 2.01057 | down | 33.99410    | 90.26494    | 33.00624    | 58.51692    | Detected    | Detected | Detected    | Detected    |
| 6018 | A_33_P3409665 | DEPDC5    | Hs.435022 | DEP domain containing 5                       | Homo sapiens DEP domain containing 5 (DEPDC5), transcript variant 2, mRNA [NM_001007188]                                                                                   | 2.56395 | down | 2.45227 | down | 21.68472    | 57.56996    | 14.18932    | 30.68283    | Detected    | Detected | Detected    | Detected    |
| 6019 | A_23_P117851  | CPLX3     | Hs.187694 | complexin 3                                   | Homo sapiens complexin 3 (CPLX3), mRNA [NM_001030005]                                                                                                                      | 2.56364 | down | 1.05283 | down | 7.70515     | 20.45369    | 18.53984    | 17.21188    | Compromised | Detected | Detected    | Detected    |
| 6020 | A_23_P18806   | YIPF5     | Hs.372050 | Yip1 domain family, member 5                  | Homo sapiens Yip1 domain family, member 5 (YIPF5), transcript variant 1, mRNA [NM_001024947]                                                                               | 2.56314 | down | 2.39738 | down | 1515.45630  | 4022.06200  | 1220.69140  | 2590.52760  | Detected    | Detected | Detected    | Detected    |

|      |               |           |           |                                                                                                 |                                                                                                                                         |         |      |         |      |             |             |             |             |             |          |             |             |
|------|---------------|-----------|-----------|-------------------------------------------------------------------------------------------------|-----------------------------------------------------------------------------------------------------------------------------------------|---------|------|---------|------|-------------|-------------|-------------|-------------|-------------|----------|-------------|-------------|
| 6021 | A_33_P3241884 | SDC3      | Hs.158287 | syndecan 3                                                                                      | Homo sapiens syndecan 3 (SDC3), mRNA [NM_014654]                                                                                        | 2.56258 | down | 2.89076 | down | 35.62002    | 94.51575    | 35.66364    | 90.90808    | Detected    | Detected | Detected    | Detected    |
| 6022 | A_32_P81768   | TMEM167A  | Hs.355606 | transmembrane protein 167A                                                                      | Homo sapiens transmembrane protein 167A (TMEM167A), mRNA [NM_174909]                                                                    | 2.56095 | down | 2.51248 | down | 1077.40810  | 2857.02320  | 853.53340   | 1890.98730  | Detected    | Detected | Detected    | Detected    |
| 6023 | A_24_P253251  | SLC7A1    | Hs.14846  | solute carrier family 7 (cationic amino acid transporter, y+ system), member 1                  | Homo sapiens solute carrier family 7 (cationic amino acid transporter, y+ system), member 1 (SLC7A1), mRNA [NM_003045]                  | 2.55839 | down | 2.54503 | down | 2154.40160  | 5707.24400  | 1371.49130  | 3077.87300  | Detected    | Detected | Detected    | Detected    |
| 6024 | A_33_P3396344 | LOC728613 |           | programmed cell death 6 pseudogene                                                              | Homo sapiens programmed cell death 6 pseudogene (LOC728613), non-coding RNA [NR_003713]                                                 | 2.55612 | down | 2.71269 | down | 38.39051    | 101.61038   | 20.86679    | 49.91382    | Detected    | Detected | Detected    | Detected    |
| 6025 | A_33_P3307147 | GRIK2     | Hs.98262  | glutamate receptor, ionotropic, kainate 2                                                       | Homo sapiens glutamate receptor, ionotropic, kainate 2 (GRIK2), transcript variant 3, mRNA [NM_001186247]                               | 2.55569 | down | 4.08285 | down | 9.83601     | 26.02920    | 3.75112     | 13.52273    | Compromised | Detected | Compromised | Compromised |
| 6026 | A_23_P127891  | BDNF      | Hs.502182 | brain-derived neurotrophic factor                                                               | Homo sapiens brain-derived neurotrophic factor (BDNF), transcript variant 1, mRNA [NM_170735]                                           | 2.55460 | down | 2.45729 | down | 22.87861    | 60.51812    | 23.43706    | 50.78387    | Detected    | Detected | Detected    | Detected    |
| 6027 | A_33_P3345031 | LOC645978 | Hs.647847 | similar to alkaline ceramidase 2                                                                | PREDICTED: Homo sapiens similar to alkaline ceramidase 2 (LOC645978), miscRNA [XR_017572]                                               | 2.55132 | down | 2.60126 | down | 7.65273     | 20.21688    | 9.23351     | 21.17952    | Compromised | Detected | Compromised | Detected    |
| 6028 | A_24_P937405  | PRSS23    | Hs.25338  | protease, serine, 23                                                                            | Homo sapiens protease, serine, 23 (PRSS23), mRNA [NM_007173]                                                                            | 2.54944 | down | 2.58708 | down | 2900.31540  | 7656.38040  | 2369.72440  | 5405.97100  | Detected    | Detected | Detected    | Detected    |
| 6029 | A_24_P290286  | P4HA3     | Hs.660541 | prolyl 4-hydroxylase, alpha polypeptide III                                                     | Homo sapiens prolyl 4-hydroxylase, alpha polypeptide III (P4HA3), mRNA [NM_182904]                                                      | 2.54749 | down | 2.68023 | down | 387.73460   | 1022.77420  | 428.14023   | 1011.86660  | Detected    | Detected | Detected    | Detected    |
| 6030 | A_23_P111888  | CTHRC1    | Hs.405614 | collagen triple helix repeat containing 1                                                       | Homo sapiens collagen triple helix repeat containing 1 (CTHRC1), mRNA [NM_138455]                                                       | 2.54723 | down | 2.52946 | down | 7924.49660  | 20901.31200 | 6844.78900  | 15267.00500 | Detected    | Detected | Detected    | Detected    |
| 6031 | A_33_P3297255 | MXD3      | Hs.702195 | MAX dimerization protein 3                                                                      | Homo sapiens MAX dimerization protein 3 (MXD3), transcript variant 1, mRNA [NM_031300]                                                  | 2.54669 | down | 2.97217 | down | 3331.50120  | 8785.16100  | 2668.29320  | 6993.15400  | Detected    | Detected | Detected    | Detected    |
| 6032 | A_23_P83192   | PHPT1     | Hs.409834 | phosphohistidine phosphatase 1                                                                  | Homo sapiens phosphohistidine phosphatase 1 (PHPT1), transcript variant 3, mRNA [NM_014172]                                             | 2.54644 | down | 2.52842 | down | 8287.05400  | 21850.78700 | 9458.26200  | 21087.52700 | Detected    | Detected | Detected    | Detected    |
| 6033 | A_33_P3264910 | NKX6-2    | Hs.134013 | NK6 homeobox 2                                                                                  | Homo sapiens NK6 homeobox 2 (NKX6-2), mRNA [NM_177400]                                                                                  | 2.54634 | down | 1.02635 | down | 8.81191     | 23.23373    | 13.50177    | 12.21949    | Compromised | Detected | Compromised | Compromised |
| 6034 | A_23_P120364  | PPDPF     | Hs.79625  | pancreatic progenitor cell differentiation and proliferation factor homolog (zebrafish)         | Homo sapiens pancreatic progenitor cell differentiation and proliferation factor homolog (zebrafish) (PPDPF), mRNA [NM_024299]          | 2.54229 | down | 2.75386 | down | 22242.42800 | 58551.73400 | 20681.11300 | 50220.59800 | Detected    | Detected | Detected    | Detected    |
| 6035 | A_33_P3766959 | TDP1      | Hs.209945 | tyrosyl-DNA phosphodiesterase 1                                                                 | Homo sapiens tyrosyl-DNA phosphodiesterase 1 (TDP1), transcript variant 1, mRNA [NM_018319]                                             | 2.54198 | down | 2.34706 | down | 2041.99390  | 5374.75800  | 1547.12000  | 3201.93800  | Detected    | Detected | Detected    | Detected    |
| 6036 | A_23_P15889   | CBLN2     | Hs.569851 | cerebellin 2 precursor                                                                          | Homo sapiens cerebellin 2 precursor (CBLN2), mRNA [NM_182511]                                                                           | 2.54193 | down | 2.44168 | down | 63.01534    | 165.86049   | 55.84948    | 120.24698   | Detected    | Detected | Detected    | Detected    |
| 6037 | A_23_P413761  | SFRS3     | Hs.405144 | splicing factor, arginine/serine-rich 3                                                         | Homo sapiens splicing factor, arginine/serine-rich 3 (SFRS3), mRNA [NM_003017]                                                          | 2.54157 | down | 2.53296 | down | 31272.47500 | 82299.51000 | 22369.75200 | 49963.74200 | Detected    | Detected | Detected    | Detected    |
| 6038 | A_23_P30630   |           | Hs.279008 |                                                                                                 | Homo sapiens cDNA FLJ20170 fis, clone COL09549, [AK000177]                                                                              | 2.54137 | down | 3.09525 | down | 29.71254    | 78.18810    | 22.37025    | 61.05659    | Detected    | Detected | Detected    | Detected    |
| 6039 | A_33_P3281807 | PDDC1     | Hs.218362 | Parkinson disease 7 domain containing 1                                                         | Homo sapiens Parkinson disease 7 domain containing 1 (PDDC1), mRNA [NM_182612]                                                          | 2.54124 | down | 3.30898 | down | 117.77679   | 309.91240   | 93.84003    | 273.80896   | Detected    | Detected | Detected    | Detected    |
| 6040 | A_33_P3272828 | RAD1      | Hs.381114 | RAD1 homolog (S. pombe)                                                                         | Homo sapiens RAD1 homolog (S. pombe) (RAD1), transcript variant 1, mRNA [NM_002853]                                                     | 2.54028 | down | 2.60463 | down | 495.68490   | 1303.82850  | 313.61246   | 720.28450   | Detected    | Detected | Detected    | Detected    |
| 6041 | A_33_P3215953 | MPZL1     | Hs.493919 | myelin protein zero-like 1                                                                      | Homo sapiens myelin protein zero-like 1 (MPZL1), transcript variant 2, mRNA [NM_024569]                                                 | 2.53983 | down | 2.78999 | down | 864.44965   | 2273.40720  | 938.67267   | 2309.30880  | Detected    | Detected | Detected    | Detected    |
| 6042 | A_33_P3266923 | LMTK2     | Hs.444179 | lemur tyrosine kinase 2                                                                         | Homo sapiens lemur tyrosine kinase 2 (LMTK2), mRNA [NM_014916]                                                                          | 2.53952 | down | 2.48420 | down | 285.02402   | 749.49160   | 184.87233   | 404.97170   | Detected    | Detected | Detected    | Detected    |
| 6043 | A_23_P22350   | GRAMD3    | Hs.363558 | GRAM domain containing 3                                                                        | Homo sapiens GRAM domain containing 3 (GRAMD3), transcript variant 2, mRNA [NM_023927]                                                  | 2.53873 | down | 2.50708 | down | 510.79553   | 1342.75710  | 365.53033   | 808.08453   | Detected    | Detected | Detected    | Detected    |
| 6044 | A_23_P134935  | DUSP4     | Hs.417962 | dual specificity phosphatase 4                                                                  | Homo sapiens dual specificity phosphatase 4 (DUSP4), transcript variant 1, mRNA [NM_001094]                                             | 2.53792 | down | 3.36778 | down | 563.96454   | 1482.05210  | 312.40347   | 927.73850   | Detected    | Detected | Detected    | Detected    |
| 6045 | A_33_P3346057 | ANKRD26P1 | Hs.97414  | ankyrin repeat domain 26 pseudogene 1                                                           | Homo sapiens ankyrin repeat domain 26 pseudogene 1 (ANKRD26P1), non-coding RNA [NR_026556]                                              | 2.53752 | down | 1.81601 | down | 12.89473    | 33.88094    | 7.96995     | 12.76261    | Detected    | Detected | Compromised | Compromised |
| 6046 | A_23_P2271    | PTH LH    | Hs.591159 | parathyroid hormone-like hormone                                                                | Homo sapiens parathyroid hormone-like hormone (PTH LH), transcript variant 1, mRNA [NM_198965]                                          | 2.53666 | down | 3.22752 | down | 111.71067   | 293.42014   | 104.14428   | 296.39456   | Detected    | Detected | Detected    | Detected    |
| 6047 | A_24_P408736  | GALNT5    | Hs.269027 | UDP-N-acetyl-alpha-D-galactosamine:polypeptide N-acetyl-galactosaminyltransferase 5 (GalNAc-T5) | Homo sapiens UDP-N-acetyl-alpha-D-galactosamine:polypeptide N-acetyl-galactosaminyltransferase 5 (GalNAc-T5) (GALNT5), mRNA [NM_014568] | 2.53418 | down | 3.04319 | down | 230.25905   | 604.21027   | 148.92079   | 399.62228   | Detected    | Detected | Detected    | Detected    |
| 6048 | A_32_P178800  | ITGA2     | Hs.482077 | integrin, alpha 2 (CD49B, alpha 2 subunit of VLA-2 receptor)                                    | Homo sapiens integrin, alpha 2 (CD49B, alpha 2 subunit of VLA-2 receptor) (ITGA2), mRNA [NM_002203]                                     | 2.53387 | down | 2.22375 | down | 142.90501   | 374.94205   | 57.59190    | 112.93089   | Detected    | Detected | Detected    | Detected    |
| 6049 | A_23_P211627  | NUP50     | Hs.475103 | nucleoporin 50kDa                                                                               | Homo sapiens nucleoporin 50kDa (NUP50), transcript variant 2, mRNA [NM_007172]                                                          | 2.53303 | down | 2.38239 | down | 189.14912   | 496.11038   | 194.19499   | 407.95926   | Detected    | Detected | Detected    | Detected    |
| 6050 | A_23_P12199   | FAM46B    | Hs.632378 | family with sequence similarity 46, member B                                                    | Homo sapiens family with sequence similarity 46, member B (FAM46B), mRNA [NM_052943]                                                    | 2.53221 | down | 2.81184 | down | 23.42695    | 61.42538    | 30.89461    | 76.60172    | Detected    | Detected | Detected    | Detected    |

|      |               |           |           |                                                                                 |                                                                                                                                                                               |         |      |         |      |            |             |            |             |             |          |             |             |
|------|---------------|-----------|-----------|---------------------------------------------------------------------------------|-------------------------------------------------------------------------------------------------------------------------------------------------------------------------------|---------|------|---------|------|------------|-------------|------------|-------------|-------------|----------|-------------|-------------|
| 6051 | A_23_P53345   | ARNTL2    | Hs.663740 | aryl hydrocarbon receptor nuclear translocator-like 2                           | Homo sapiens aryl hydrocarbon receptor nuclear translocator-like 2 (ARNTL2), mRNA [NM_020183]                                                                                 | 2.53179 | down | 3.12478 | down | 148.94034  | 390.45737   | 133.47813  | 367.78635   | Detected    | Detected | Detected    | Detected    |
| 6052 | A_33_P3420235 |           |           |                                                                                 | Actin-related protein 2/3 complex subunit 5 (Arp2/3 complex 16 kDa subunit)(p16-ARC) [Source:UniProtKB/Swiss-Prot;Acc:O15511] [ENST00000367534]                               | 2.53171 | down | 3.00224 | down | 773.52110  | 2027.77590  | 666.90090  | 1765.52090  | Detected    | Detected | Detected    | Detected    |
| 6053 | A_23_P32078   | SLC28A3   | Hs.591877 | solute carrier family 28 (sodium-coupled nucleoside transporter), member 3      | Homo sapiens solute carrier family 28 (sodium-coupled nucleoside transporter), member 3 (SLC28A3), mRNA [NM_022127]                                                           | 2.53168 | down | 8.08059 | down | 9.02851    | 23.66776    | 3.09259    | 22.03587    | Compromised | Detected | Compromised | Detected    |
| 6054 | A_23_P406424  | RHOC      | Hs.502659 | ras homolog gene family, member C                                               | Homo sapiens ras homolog gene family, member C (RHOC), transcript variant 1, mRNA [NM_175744]                                                                                 | 2.53060 | down | 2.60652 | down | 5026.02540 | 13169.86300 | 6031.70260 | 13863.27700 | Detected    | Detected | Detected    | Detected    |
| 6055 | A_24_P394698  | ORCSL     | Hs.432948 | origin recognition complex, subunit 5-like (yeast)                              | Homo sapiens origin recognition complex, subunit 5-like (yeast) (ORCSL), transcript variant 2, mRNA [NM_181747]                                                               | 2.53000 | down | 2.19107 | down | 256.43274  | 671.77900   | 235.99830  | 455.96338   | Detected    | Detected | Detected    | Detected    |
| 6056 | A_32_P447001  | FLJ27352  | Hs.97300  | hypothetical LOC145788                                                          | RST28817 Athersys RAGE Library Homo sapiens cDNA, mRNA sequence [BG209302]                                                                                                    | 2.52981 | down | 2.14532 | down | 63.44371   | 166.19188   | 48.17236   | 91.12878    | Detected    | Detected | Detected    | Detected    |
| 6057 | A_33_P3368452 | MICA      | Hs.130838 | MHC class I polypeptide-related sequence A                                      | Homo sapiens MHC class I polypeptide-related sequence A (MICA), mRNA [NM_000247]                                                                                              | 2.52957 | down | 2.73209 | down | 1665.87730 | 4363.37100  | 2767.22300 | 6666.61500  | Detected    | Detected | Detected    | Detected    |
| 6058 | A_23_P38677   | SLMO1     | Hs.514718 | slowmo homolog 1 (Drosophila)                                                   | Homo sapiens slowmo homolog 1 (Drosophila) (SLMO1), transcript variant 2, mRNA [NM_006553]                                                                                    | 2.52936 | down | 2.67472 | down | 1760.95780 | 4612.03370  | 1383.03630 | 3261.94650  | Detected    | Detected | Detected    | Detected    |
| 6059 | A_33_P3361636 | MGP       | Hs.365706 | matrix Gla protein                                                              | Homo sapiens matrix Gla protein (MGP), mRNA [NM_000900]                                                                                                                       | 2.52689 | down | 2.33465 | down | 556.05340  | 1454.91060  | 381.32965  | 785.03357   | Detected    | Detected | Detected    | Detected    |
| 6060 | A_23_P149496  | XKR8      | Hs.55024  | XK, Kell blood group complex subunit-related family, member 8                   | Homo sapiens XK, Kell blood group complex subunit-related family, member 8 (XKR8), mRNA [NM_018053]                                                                           | 2.52635 | down | 2.55800 | down | 5250.29200 | 13734.41800 | 5224.32000 | 11784.10300 | Detected    | Detected | Detected    | Detected    |
| 6061 | A_33_P3300267 | VIT       | Hs.137415 | vitrin                                                                          | Homo sapiens vitrin (VIT), mRNA [NM_053276]                                                                                                                                   | 2.52394 | down | 3.44368 | down | 85.68382   | 223.92923   | 50.45416   | 153.20938   | Detected    | Detected | Detected    | Detected    |
| 6062 | A_23_P1981    | INS       | Hs.272259 | insulin                                                                         | Homo sapiens insulin (INS), mRNA [NM_000207]                                                                                                                                  | 2.52175 | down | 2.18205 | down | 139.44559  | 364.11545   | 40.17003   | 77.29170    | Detected    | Detected | Detected    | Detected    |
| 6063 | A_33_P3254380 | SLC9A7    | Hs.620643 | solute carrier family 9 (sodium/hydrogen exchanger), member 7                   | Sodium/hydrogen exchanger 7 (Na <sup>+</sup> /H <sup>+</sup> exchanger 7)(NHE-7)(Solute carrier family 9 member 7) [Source:UniProtKB/Swiss-Prot;Acc:Q96T63] [ENST00000329306] | 2.52108 | down | 2.30829 | down | 151.78690  | 396.23560   | 124.76785  | 253.95550   | Detected    | Detected | Detected    | Detected    |
| 6064 | A_33_P3268578 | PBRM1     | Hs.189920 | polybromo 1                                                                     | Homo sapiens polybromo 1 (PBRM1), transcript variant 2, mRNA [NM_018313]                                                                                                      | 2.52092 | down | 2.36905 | down | 132.12141  | 344.87750   | 115.50369  | 241.28790   | Detected    | Detected | Detected    | Detected    |
| 6065 | A_23_P385690  | WNT3A     | Hs.336930 | wingless-type MMTV integration site family, member 3A                           | Homo sapiens wingless-type MMTV integration site family, member 3A (WNT3A), mRNA [NM_033131]                                                                                  | 2.52058 | down | 1.19988 | down | 7.54677    | 19.69674    | 2.97291    | 3.14547     | Compromised | Detected | Compromised | Compromised |
| 6066 | A_33_P3294985 | LOC554203 | Hs.648316 | alanyl-tRNA synthetase domain containing 1 pseudogene                           | Homo sapiens alanyl-tRNA synthetase domain containing 1 pseudogene (LOC554203), non-coding RNA [NR_024582]                                                                    | 2.51988 | down | 2.39459 | down | 66.83788   | 174.39539   | 46.88966   | 99.00875    | Detected    | Detected | Detected    | Detected    |
| 6067 | A_24_P262127  | RRAD      | Hs.1027   | Ras-related associated with diabetes                                            | Homo sapiens Ras-related associated with diabetes (RRAD), transcript variant 2, mRNA [NM_004165]                                                                              | 2.51985 | down | 3.06774 | down | 228.89052  | 597.22144   | 285.99597  | 773.64844   | Detected    | Detected | Detected    | Detected    |
| 6068 | A_23_P63190   | NRAS      | Hs.486502 | neuroblastoma RAS viral (v-ras) oncogene homolog                                | Homo sapiens neuroblastoma RAS viral (v-ras) oncogene homolog (NRAS), mRNA [NM_002524]                                                                                        | 2.51847 | down | 2.39325 | down | 508.72348  | 1326.63800  | 386.08365  | 814.76886   | Detected    | Detected | Detected    | Detected    |
| 6069 | A_24_P290770  | OGDH      | Hs.488181 | oxoglutarate (alpha-ketoglutarate) dehydrogenase (lipoamide)                    | Homo sapiens oxoglutarate (alpha-ketoglutarate) dehydrogenase (lipoamide) (OGDH), nuclear gene encoding mitochondrial protein, transcript variant 2, mRNA [NM_001003941]      | 2.51771 | down | 2.90575 | down | 44.02111   | 114.76238   | 53.60998   | 137.36299   | Detected    | Detected | Detected    | Detected    |
| 6070 | A_32_P711447  | NCAPD3    | Hs.438550 | non-SMC condensin II complex, subunit D3                                        | Homo sapiens non-SMC condensin II complex, subunit D3 (NCAPD3), mRNA [NM_015261]                                                                                              | 2.51747 | down | 2.26148 | down | 413.87637  | 1078.86700  | 272.70170  | 543.80820   | Detected    | Detected | Detected    | Detected    |
| 6071 | A_33_P3391496 |           |           |                                                                                 | Slit homolog 3 protein Precursor (Slit-3)(Multiple epidermal growth factor-like domains 5) [Source:UniProtKB/Swiss-Prot;Acc:O75094] [ENST00000404867]                         | 2.51629 | down | 2.46751 | down | 674.61280  | 1757.71770  | 172.66180  | 375.68283   | Detected    | Detected | Detected    | Detected    |
| 6072 | A_23_P148194  | ADI1      | Hs.502773 | acireductone dioxygenase 1                                                      | Homo sapiens acireductone dioxygenase 1 (ADI1), mRNA [NM_018269]                                                                                                              | 2.51575 | down | 2.63327 | down | 2069.96200 | 5392.15970  | 2306.94100 | 5356.70360  | Detected    | Detected | Detected    | Detected    |
| 6073 | A_32_P86763   | TGM2      | Hs.517033 | transglutaminase 2 (C polypeptide, protein-glutamine-gamma-glutamyltransferase) | Homo sapiens transglutaminase 2 (C polypeptide, protein-glutamine-gamma-glutamyltransferase) (TGM2), transcript variant 1, mRNA [NM_004613]                                   | 2.51390 | down | 2.95012 | down | 1059.96140 | 2759.12200  | 1114.69900 | 2899.76730  | Detected    | Detected | Detected    | Detected    |
| 6074 | A_23_P256641  | KCNE1L    | Hs.522753 | KCNE1-like                                                                      | Homo sapiens KCNE1-like (KCNE1L), mRNA [NM_012282]                                                                                                                            | 2.51375 | down | 3.45986 | down | 42.89677   | 111.65563   | 31.22060   | 95.25002    | Detected    | Detected | Detected    | Detected    |
| 6075 | A_33_P3325467 | C1orf212  | Hs.27160  | chromosome 1 open reading frame 212                                             | Homo sapiens chromosome 1 open reading frame 212 (C1orf212), transcript variant 1, mRNA [NM_001164824]                                                                        | 2.51368 | down | 2.57157 | down | 2771.84940 | 7214.60550  | 1743.39760 | 3953.29830  | Detected    | Detected | Detected    | Detected    |
| 6076 | A_23_P169003  | SH2D4A    | Hs.303208 | SH2 domain containing 4A                                                        | Homo sapiens SH2 domain containing 4A (SH2D4A), mRNA [NM_022071]                                                                                                              | 2.50989 | down | 2.32534 | down | 143.82076  | 373.77426   | 142.13403  | 291.44107   | Detected    | Detected | Detected    | Detected    |
| 6077 | A_33_P3227880 | BTN3A1    | Hs.191510 | butyrophilin, subfamily 3, member A1                                            | Homo sapiens butyrophilin, subfamily 3, member A1 (BTN3A1), transcript variant 4, mRNA [NM_001145009]                                                                         | 2.50982 | down | 2.38759 | down | 97.49861   | 253.38077   | 82.59837   | 173.89894   | Detected    | Detected | Detected    | Detected    |

|      |                |           |           |                                                                           |                                                                                                                                                             |         |      |         |      |            |             |            |            |             |             |             |             |
|------|----------------|-----------|-----------|---------------------------------------------------------------------------|-------------------------------------------------------------------------------------------------------------------------------------------------------------|---------|------|---------|------|------------|-------------|------------|------------|-------------|-------------|-------------|-------------|
| 6078 | A_23_P377664   | ALS2      | Hs.471096 | amyotrophic lateral sclerosis 2 (juvenile)                                | Homo sapiens amyotrophic lateral sclerosis 2 (juvenile) (ALS2), transcript variant 2, mRNA [NM_001135745]                                                   | 2.50830 | down | 2.03062 | down | 175.92603  | 456.92320   | 125.99452  | 225.60312  | Detected    | Detected    | Detected    | Detected    |
| 6079 | A_33_P3416366  | CHAF1A    | Hs.79018  | chromatin assembly factor 1, subunit A (p150)                             | Homo sapiens chromatin assembly factor 1, subunit A (p150) (CHAF1A), mRNA [NM_005483]                                                                       | 2.50772 | down | 3.14510 | down | 151.97786  | 394.63272   | 149.46780  | 414.52173  | Detected    | Detected    | Detected    | Detected    |
| 6080 | A_23_P77813    | FN3KRP    | Hs.31431  | fructosamine 3 kinase related protein                                     | Homo sapiens fructosamine 3 kinase related protein (FN3KRP), mRNA [NM_024619]                                                                               | 2.50687 | down | 2.63654 | down | 3332.87130 | 8651.34500  | 2808.80540 | 6530.11870 | Detected    | Detected    | Detected    | Detected    |
| 6081 | A_23_P157736   | PPAPDC3   | Hs.134292 | phosphatidic acid phosphatase type 2 domain containing 3                  | Homo sapiens phosphatidic acid phosphatase type 2 domain containing 3 (PPAPDC3), mRNA [NM_032728]                                                           | 2.50612 | down | 2.56138 | down | 1563.39950 | 4056.99170  | 1377.32860 | 3110.83980 | Detected    | Detected    | Detected    | Detected    |
| 6082 | A_23_P19020    | SNCAIP    | Hs.426463 | synuclein, alpha interacting protein                                      | Homo sapiens synuclein, alpha interacting protein (SNCAIP), mRNA [NM_005460]                                                                                | 2.50606 | down | 2.15893 | down | 123.14758  | 319.55880   | 93.24688   | 177.51604  | Detected    | Detected    | Detected    | Detected    |
| 6083 | A_33_P3303385  | NCAPD2    | Hs.5719   | non-SMC condensin I complex, subunit D2                                   | Homo sapiens non-SMC condensin I complex, subunit D2 (NCAPD2), mRNA [NM_014865]                                                                             | 2.50551 | down | 2.51967 | down | 4493.94040 | 11658.85200 | 2878.19700 | 6394.83150 | Detected    | Detected    | Detected    | Detected    |
| 6084 | A_23_P118300   | FAHD1     | Hs.513265 | fumarylacetoacetate hydrolase domain containing 1                         | Homo sapiens fumarylacetoacetate hydrolase domain containing 1 (FAHD1), nuclear gene encoding mitochondrial protein, transcript variant 2, mRNA [NM_031208] | 2.50527 | down | 2.45815 | down | 745.33990  | 1933.49340  | 669.80225  | 1451.84580 | Detected    | Detected    | Detected    | Detected    |
| 6085 | A_24_P199655   | VANGL1    | Hs.515130 | vang-like 1 (van gogh, Drosophila)                                        | Homo sapiens vang-like 1 (van gogh, Drosophila) (VANGL1), mRNA [NM_138959]                                                                                  | 2.50311 | down | 2.72575 | down | 1087.22750 | 2817.95170  | 627.55300  | 1508.35030 | Detected    | Detected    | Detected    | Detected    |
| 6086 | A_33_P3789327  | SNORD12B  | Hs.711216 | small nucleolar RNA, C/D box 12B                                          | AV755695 BM Homo sapiens cDNA clone BMBFHD10 5', mRNA sequence [AV755695]                                                                                   | 2.50297 | down | 1.07079 | down | 5.49398    | 14.23889    | 14.20500   | 13.41249   | Compromised | Compromised | Detected    | Detected    |
| 6087 | A_23_P256504   | AMBP      | Hs.436911 | alpha-1-microglobulin/bikunin precursor                                   | Homo sapiens alpha-1-microglobulin/bikunin precursor (AMBP), mRNA [NM_001633]                                                                               | 2.50204 | down | 2.71173 | down | 2.89774    | 7.50736     | 7.41574    | 17.73235   | Compromised | Compromised | Compromised | Detected    |
| 6088 | A_33_P3543133  | LOC283624 | Hs.525210 | hypothetical protein LOC283624                                            | Homo sapiens cDNA clone IMAGE:5264647 [BC035145]                                                                                                            | 2.50167 | down | 2.05394 | down | 69.29273   | 179.49455   | 50.96552   | 92.30598   | Detected    | Detected    | Detected    | Detected    |
| 6089 | A_33_P33346801 | BMF       | Hs.591104 | Bcl2 modifying factor                                                     | Homo sapiens Bcl2 modifying factor (BMF), transcript variant 1, mRNA [NM_001003940]                                                                         | 2.50148 | down | 1.68808 | down | 7.11277    | 18.42336    | 3.08540    | 4.59273    | Compromised | Detected    | Compromised | Compromised |
| 6090 | A_23_P436138   | MAX       | Hs.285354 | MYC associated factor X                                                   | Homo sapiens MYC associated factor X (MAX), transcript variant 4, mRNA [NM_145114]                                                                          | 2.50058 | down | 2.09089 | down | 98.50628   | 255.05763   | 108.89657  | 200.77528  | Detected    | Detected    | Detected    | Detected    |
| 6091 | A_32_P212471   | C1orf230  | Hs.297967 | chromosome 1 open reading frame 230                                       | Homo sapiens chromosome 1 open reading frame 230 (C1orf230), mRNA [NM_001144956]                                                                            | 2.50013 | down | 2.48564 | down | 76.72168   | 198.61569   | 59.04790   | 129.42210  | Detected    | Detected    | Detected    | Detected    |
| 6092 | A_33_P3394809  | PCYT2     | Hs.569843 | phosphate cytidyltransferase 2, ethanolamine                              | Homo sapiens phosphate cytidyltransferase 2, ethanolamine (PCYT2), mRNA [NM_002861]                                                                         | 2.49891 | down | 2.65682 | down | 408.40662  | 1056.75930  | 488.21625  | 1143.77150 | Detected    | Detected    | Detected    | Detected    |
| 6093 | A_24_P371425   | ATRIP     | Hs.694840 | ATR interacting protein                                                   | Homo sapiens ATR interacting protein (ATRIP), transcript variant 2, mRNA [NM_032166]                                                                        | 2.49855 | down | 2.76371 | down | 207.66063  | 537.24880   | 186.33270  | 454.09518  | Detected    | Detected    | Detected    | Detected    |
| 6094 | A_23_P29769    | WWTR1     | Hs.477921 | WW domain containing transcription regulator 1                            | Homo sapiens WW domain containing transcription regulator 1 (WWTR1), mRNA [NM_015472]                                                                       | 2.49829 | down | 2.45124 | down | 300.61365  | 777.64980   | 292.62402  | 632.50226  | Detected    | Detected    | Detected    | Detected    |
| 6095 | A_33_P3265104  | PITRM1    | Hs.528300 | pitrilysin metalloproteinase 1                                            | Homo sapiens pitrilysin metalloproteinase 1 (PITRM1), mRNA [NM_014889]                                                                                      | 2.49799 | down | 2.59162 | down | 806.61370  | 2086.35740  | 712.91950  | 1629.21360 | Detected    | Detected    | Detected    | Detected    |
| 6096 | A_24_P753476   | LOC340508 | Hs.680438 | hypothetical protein LOC340508                                            | Homo sapiens hypothetical protein LOC340508 (LOC340508), non-coding RNA [NR_002942]                                                                         | 2.49638 | down | 2.46027 | down | 2071.20460 | 5353.84670  | 801.01590  | 1737.76090 | Detected    | Detected    | Detected    | Detected    |
| 6097 | A_24_P330112   | MAGOHB    | Hs.104650 | mago-nashi homolog B (Drosophila)                                         | Homo sapiens mago-nashi homolog B (Drosophila) (MAGOHB), mRNA [NM_018048]                                                                                   | 2.49562 | down | 2.41069 | down | 56.82209   | 146.83475   | 45.77235   | 97.29925   | Detected    | Detected    | Detected    | Detected    |
| 6098 | A_23_P59294    | RREB1     | Hs.298248 | ras responsive element binding protein 1                                  | Homo sapiens ras responsive element binding protein 1 (RREB1), transcript variant 1, mRNA [NM_001003959]                                                    | 2.49536 | down | 2.89243 | down | 57.91427   | 149.64166   | 58.44019   | 149.05257  | Detected    | Detected    | Detected    | Detected    |
| 6099 | A_23_P354297   | CHTF18    | Hs.153850 | CTF18, chromosome transmission fidelity factor 18 homolog (S. cerevisiae) | Homo sapiens CTF18, chromosome transmission fidelity factor 18 homolog (S. cerevisiae) (CHTF18), mRNA [NM_022092]                                           | 2.49430 | down | 2.84411 | down | 1519.76300 | 3925.16500  | 1825.87410 | 4579.13430 | Detected    | Detected    | Detected    | Detected    |
| 6100 | A_33_P3240946  | DPF3      |           | D4, zinc and double PHD fingers, family 3                                 | Zinc finger protein DPF3 (zfp-d4) [Source:UniProtKB/Swiss-Prot;Acc:Q92784] [ENST00000366353]                                                                | 2.49360 | down | 2.25698 | down | 78.99602   | 203.96918   | 57.71237   | 114.85812  | Detected    | Detected    | Detected    | Detected    |
| 6101 | A_33_P3404651  | TTC7A     | Hs.370603 | tetratricopeptide repeat domain 7A                                        | Homo sapiens tetratricopeptide repeat domain 7A (TTC7A), mRNA [NM_020458]                                                                                   | 2.49325 | down | 2.87870 | down | 634.87573  | 1639.03380  | 613.56366  | 1557.47860 | Detected    | Detected    | Detected    | Detected    |
| 6102 | A_33_P3309734  | CCDC108   | Hs.147762 | coiled-coil domain containing 108                                         | Homo sapiens coiled-coil domain containing 108 (CCDC108), transcript variant 2, mRNA [NM_152389]                                                            | 2.49308 | down | 1.01566 | down | 3.41628    | 8.81907     | 17.17422   | 15.38123   | Compromised | Compromised | Detected    | Detected    |
| 6103 | A_33_P3389573  | CARD9     | Hs.694071 | caspase recruitment domain family, member 9                               | Homo sapiens caspase recruitment domain family, member 9 (CARD9), transcript variant 2, mRNA [NM_052814]                                                    | 2.49307 | down | 3.07274 | down | 28.66742   | 74.00422    | 34.23233   | 92.75295   | Detected    | Detected    | Detected    | Detected    |
| 6104 | A_23_P4944     | CALM3     | Hs.515487 | calmodulin 3 (phosphorylase kinase, delta)                                | Homo sapiens calmodulin 3 (phosphorylase kinase, delta) (CALM3), mRNA [NM_005184]                                                                           | 2.49293 | down | 2.61785 | down | 2417.55200 | 6240.50340  | 2474.45460 | 5712.03000 | Detected    | Detected    | Detected    | Detected    |
| 6105 | A_33_P3422897  | ABCA1     | Hs.429294 | ATP-binding cassette, sub-family A (ABCA1), member 1                      | Homo sapiens ATP-binding cassette, sub-family A (ABCA1), member 1 (ABCA1), mRNA [NM_005502]                                                                 | 2.49273 | down | 2.56954 | down | 112.89477  | 291.39542   | 126.15270  | 285.83590  | Detected    | Detected    | Detected    | Detected    |
| 6106 | A_33_P3371154  | ZNF365    | Hs.22653  | zinc finger protein 365                                                   | Homo sapiens zinc finger protein 365 (ZNF365), transcript variant C, mRNA [NM_199451]                                                                       | 2.49224 | down | 2.04376 | down | 7.90200    | 20.39196    | 10.66245   | 19.21553   | Compromised | Detected    | Compromised | Detected    |

|      |               |              |           |                                                                                              |                                                                                                                                    |         |      |         |      |             |             |             |             |             |          |             |             |
|------|---------------|--------------|-----------|----------------------------------------------------------------------------------------------|------------------------------------------------------------------------------------------------------------------------------------|---------|------|---------|------|-------------|-------------|-------------|-------------|-------------|----------|-------------|-------------|
| 6107 | A_24_P410605  | ROR1         | Hs.654491 | receptor tyrosine kinase-like orphan receptor 1                                              | Homo sapiens receptor tyrosine kinase-like orphan receptor 1 (ROR1), transcript variant 2, mRNA [NM_001083592]                     | 2.49206 | down | 5.69445 | down | 29.28802    | 75.57572    | 13.11706    | 65.86491    | Detected    | Detected | Compromised | Detected    |
| 6108 | A_23_P157170  | DNAJC30      | Hs.647046 | Dnaj (Hsp40) homolog, subfamily C, member 30                                                 | Homo sapiens Dnaj (Hsp40) homolog, subfamily C, member 30 (DNAJC30), mRNA [NM_023217]                                              | 2.49017 | down | 2.62701 | down | 598.98004   | 1544.45200  | 877.11010   | 2031.80380  | Detected    | Detected | Detected    | Detected    |
| 6109 | A_24_P401174  | KIAA0556     | Hs.720307 | KIAA0556                                                                                     | Homo sapiens KIAA0556 (KIAA0556), mRNA [NM_015202]                                                                                 | 2.48968 | down | 1.77989 | down | 8.93182     | 23.02590    | 16.25209    | 25.50750    | Compromised | Detected | Compromised | Detected    |
| 6110 | A_24_P353300  | LIMK2        | Hs.474596 | LIM domain kinase 2                                                                          | Homo sapiens LIM domain kinase 2 (LIMK2), transcript variant 1, mRNA [NM_001031801]                                                | 2.48907 | down | 2.98029 | down | 138.75307   | 357.61243   | 112.42522   | 295.45288   | Detected    | Detected | Detected    | Detected    |
| 6111 | A_23_P27133   | KRT15        | Hs.654570 | keratin 15                                                                                   | Homo sapiens keratin 15 (KRT15), mRNA [NM_002275]                                                                                  | 2.48813 | down | 4.77803 | down | 179.01105   | 461.19702   | 85.27985    | 359.30334   | Detected    | Detected | Detected    | Detected    |
| 6112 | A_33_P3317548 |              |           |                                                                                              |                                                                                                                                    | 2.48725 | down | 2.52355 | down | 9.50813     | 24.48768    | 11.18813    | 24.89634    | Compromised | Detected | Compromised | Detected    |
| 6113 | A_23_P40217   | DOK5         | Hs.656582 | docking protein 5                                                                            | Homo sapiens docking protein 5 (DOK5), mRNA [NM_018431]                                                                            | 2.48687 | down | 2.23888 | down | 39.52886    | 101.78900   | 32.38094    | 63.92725    | Detected    | Detected | Detected    | Detected    |
| 6114 | A_23_P47924   | PTPRR        | Hs.506076 | protein tyrosine phosphatase, receptor type, R                                               | Homo sapiens protein tyrosine phosphatase, receptor type, R (PTPRR), transcript variant 1, mRNA [NM_002849]                        | 2.48652 | down | 2.76846 | down | 48.54148    | 124.97920   | 36.28098    | 88.56933    | Detected    | Detected | Detected    | Detected    |
| 6115 | A_23_P115149  | WDR77        | Hs.204773 | WD repeat domain 77                                                                          | Homo sapiens WD repeat domain 77 (WDR77), mRNA [NM_024102]                                                                         | 2.48650 | down | 2.72222 | down | 586.81230   | 1510.84510  | 483.81512   | 1161.36390  | Detected    | Detected | Detected    | Detected    |
| 6116 | A_23_P108673  | FAM176A      | Hs.302346 | family with sequence similarity 176, member A                                                | Homo sapiens family with sequence similarity 176, member A (FAM176A), transcript variant 2, mRNA [NM_032181]                       | 2.48649 | down | 2.32517 | down | 1181.12110  | 3040.98500  | 926.00890   | 1898.60890  | Detected    | Detected | Detected    | Detected    |
| 6117 | A_33_P3349269 | PIAS2        | Hs.658013 | protein inhibitor of activated STAT, 2                                                       | Homo sapiens protein inhibitor of activated STAT, 2 (PIAS2), transcript variant alpha, mRNA [NM_173206]                            | 2.48625 | down | 2.47641 | down | 1026.33940  | 2642.21950  | 931.23150   | 2033.50620  | Detected    | Detected | Detected    | Detected    |
| 6118 | A_24_P100551  | SH3RF1       | Hs.301804 | SH3 domain containing ring finger 1                                                          | Homo sapiens SH3 domain containing ring finger 1 (SH3RF1), mRNA [NM_020870]                                                        | 2.48470 | down | 2.65593 | down | 2399.53700  | 6173.54200  | 1805.06120  | 4227.40330  | Detected    | Detected | Detected    | Detected    |
| 6119 | A_33_P3424207 | RABEP2       | Hs.555978 | rabaptin, RAB GTPase binding effector protein 2                                              | Homo sapiens rabaptin, RAB GTPase binding effector protein 2 (RABEP2), mRNA [NM_024616]                                            | 2.48329 | down | 2.83293 | down | 3258.06100  | 8377.60900  | 3548.11280  | 8863.38300  | Detected    | Detected | Detected    | Detected    |
| 6120 | A_24_P68631   | HIST2H2AB    | Hs.664173 | histone cluster 2, H2ab                                                                      | Homo sapiens histone cluster 2, H2ab (HIST2H2AB), mRNA [NM_175065]                                                                 | 2.48322 | down | 2.41808 | down | 1488.53820  | 3827.44360  | 1223.70410  | 2609.23460  | Detected    | Detected | Detected    | Detected    |
| 6121 | A_23_P52067   | GRHL3        | Hs.657920 | grainyhead-like 3 (Drosophila)                                                               | Homo sapiens grainyhead-like 3 (Drosophila) (GRHL3), transcript variant 2, mRNA [NM_198173]                                        | 2.48116 | down | 1.92356 | down | 9.04561     | 23.23941    | 8.06883     | 13.68614    | Compromised | Detected | Compromised | Compromised |
| 6122 | A_33_P3236798 | SRMS         | Hs.411061 | src-related kinase lacking C-terminal regulatory tyrosine and N-terminal myristylation sites | Homo sapiens src-related kinase lacking C-terminal regulatory tyrosine and N-terminal myristylation sites (SRMS), mRNA [NM_080823] | 2.48043 | down | 1.86080 | down | 167.50746   | 430.22403   | 51.95333    | 85.24708    | Detected    | Detected | Detected    | Detected    |
| 6123 | A_23_P251051  | NF2          | Hs.187898 | neurofibromin 2 (merlin)                                                                     | Homo sapiens neurofibromin 2 (merlin) (NF2), transcript variant 8, mRNA [NM_181832]                                                | 2.48016 | down | 2.50964 | down | 21018.50000 | 53977.72700 | 13933.72700 | 30834.99600 | Detected    | Detected | Detected    | Detected    |
| 6124 | A_33_P3832857 | HAUS2        | Hs.14347  | HAUS augmin-like complex, subunit 2                                                          | Homo sapiens HAUS augmin-like complex, subunit 2 (HAUS2), transcript variant 1, mRNA [NM_018097]                                   | 2.47988 | down | 2.29437 | down | 289.12366   | 742.41460   | 231.88481   | 469.13907   | Detected    | Detected | Detected    | Detected    |
| 6125 | A_33_P3268899 | RECK         | Hs.388918 | reversion-inducing-cysteine-rich protein with kazal motifs                                   | Homo sapiens reversion-inducing-cysteine-rich protein with kazal motifs (RECK), mRNA [NM_021111]                                   | 2.47901 | down | 2.31027 | down | 473.27023   | 1214.84310  | 366.85492   | 747.34644   | Detected    | Detected | Detected    | Detected    |
| 6126 | A_33_P3382471 | CYP4A22      | Hs.720099 | cytochrome P450, family 4, subfamily A, polypeptide 22                                       | Homo sapiens cytochrome P450, family 4, subfamily A, polypeptide 22 (CYP4A22), mRNA [NM_001010969]                                 | 2.47876 | down | 2.01077 | down | 14.67549    | 37.66693    | 2.99643     | 5.31290     | Detected    | Detected | Compromised | Compromised |
| 6127 | A_24_P149036  | DPYSL3       | Hs.519659 | dihydropyrimidinase-like 3                                                                   | Homo sapiens dihydropyrimidinase-like 3 (DPYSL3), mRNA [NM_001387]                                                                 | 2.47867 | down | 2.69582 | down | 3321.12720  | 8523.89300  | 2517.92300  | 5985.48200  | Detected    | Detected | Detected    | Detected    |
| 6128 | A_24_P306720  | LOC400236    | Hs.585207 | hypothetical LOC400236                                                                       | PREDICTED: Homo sapiens hypothetical LOC400236 (LOC400236), mRNA [XM_001715158]                                                    | 2.47848 | down | 2.55728 | down | 131.54169   | 337.58365   | 137.39941   | 309.83398   | Detected    | Detected | Detected    | Detected    |
| 6129 | A_32_P37360   | LACE1        | Hs.259666 | lactation elevated 1                                                                         | Homo sapiens lactation elevated 1 (LACE1), mRNA [NM_145315]                                                                        | 2.47841 | down | 2.22187 | down | 166.79219   | 428.03720   | 188.52467   | 369.36246   | Detected    | Detected | Detected    | Detected    |
| 6130 | A_33_P3311245 | KRTAP19-7    | Hs.553696 | keratin associated protein 19-7                                                              | Homo sapiens keratin associated protein 19-7 (KRTAP19-7), mRNA [NM_181614]                                                         | 2.47821 | down | 1.22272 | down | 258.95758   | 664.50745   | 72.93908    | 78.64144    | Detected    | Detected | Detected    | Detected    |
| 6131 | A_23_P258088  | PACSN1       | Hs.520087 | protein kinase C and casein kinase substrate in neurons 1                                    | Homo sapiens protein kinase C and casein kinase substrate in neurons 1 (PACSN1), mRNA [NM_020804]                                  | 2.47755 | down | 2.40133 | down | 10.45485    | 26.82089    | 9.09319     | 19.25454    | Compromised | Detected | Compromised | Detected    |
| 6132 | A_32_P473302  | FLJ35024     |           | hypothetical LOC401491                                                                       | Homo sapiens hypothetical LOC401491 (FLJ35024), non-coding RNA [NR_015375]                                                         | 2.47740 | down | 2.26662 | down | 19.76472    | 50.70144    | 13.08676    | 26.15627    | Detected    | Detected | Compromised | Detected    |
| 6133 | A_23_P2355    | CBX5         | Hs.349283 | chromobox homolog 5 (HP1 alpha homolog, Drosophila)                                          | Homo sapiens chromobox homolog 5 (HP1 alpha homolog, Drosophila) (CBX5), transcript variant 3, mRNA [NM_012117]                    | 2.47675 | down | 2.33323 | down | 434.09314   | 1113.26600  | 439.20462   | 903.62960   | Detected    | Detected | Detected    | Detected    |
| 6134 | A_33_P3287646 | HSPB1        | Hs.520973 | heat shock 27kDa protein 1                                                                   | Homo sapiens heat shock 27kDa protein 1 (HSPB1), mRNA [NM_001540]                                                                  | 2.47554 | down | 2.47905 | down | 28385.48400 | 72761.05500 | 15268.13600 | 33376.15600 | Detected    | Detected | Detected    | Detected    |
| 6135 | A_33_P3224505 | LOC100131099 | Hs.664462 | hypothetical protein LOC100131099                                                            | Homo sapiens cDNA FLJ43943 fis, clone TESTH014306, [AK125931]                                                                      | 2.47539 | down | 1.78872 | down | 20.03097    | 51.34262    | 11.63518    | 18.35186    | Detected    | Detected | Compromised | Compromised |
| 6136 | A_23_P216396  | EXOSC2       | Hs.654643 | exosome component 2                                                                          | Homo sapiens exosome component 2 (EXOSC2), mRNA [NM_014285]                                                                        | 2.47501 | down | 2.26699 | down | 204.91870   | 525.15906   | 160.91360   | 321.68820   | Detected    | Detected | Detected    | Detected    |
| 6137 | A_24_P2648    | PTPN14       | Hs.696573 | protein tyrosine phosphatase, non-receptor type 14                                           | Homo sapiens protein tyrosine phosphatase, non-receptor type 14 (PTPN14), mRNA [NM_005401]                                         | 2.47475 | down | 2.53917 | down | 149.74060   | 383.71133   | 103.39730   | 231.50789   | Detected    | Detected | Detected    | Detected    |
| 6138 | A_24_P20200   | PLEKH2       | Hs.469944 | pleckstrin homology domain containing, family B (evectins) member 2                          | Homo sapiens pleckstrin homology domain containing, family B (evectins) member 2 (PLEKH2), transcript variant 2, mRNA [NM_017958]  | 2.47303 | down | 2.56847 | down | 359.18152   | 919.76434   | 471.39905   | 1066.82010  | Detected    | Detected | Detected    | Detected    |

|      |               |          |           |                                                                            |                                                                                                                                                                                             |         |      |         |      |             |             |            |             |             |          |             |             |
|------|---------------|----------|-----------|----------------------------------------------------------------------------|---------------------------------------------------------------------------------------------------------------------------------------------------------------------------------------------|---------|------|---------|------|-------------|-------------|------------|-------------|-------------|----------|-------------|-------------|
| 6139 | A_23_P165937  | DSN1     | Hs.632268 | DSN1, MIND kinetochore complex component, homolog (S. cerevisiae)          | Homo sapiens DSN1, MIND kinetochore complex component, homolog (S. cerevisiae) (DSN1), transcript variant 3, mRNA [NM_024918]                                                               | 2.47279 | down | 2.33463 | down | 1387.92600  | 3553.74630  | 1072.91850 | 2208.77050  | Detected    | Detected | Detected    | Detected    |
| 6140 | A_33_P3259042 | MYOCD    | Hs.567641 | myocardin                                                                  | Homo sapiens myocardin (MYOCD), transcript variant 3, mRNA [NM_001146313]                                                                                                                   | 2.47275 | down | 1.88956 | down | 7.10948     | 18.20330    | 6.43418    | 10.72063    | Compromised | Detected | Compromised | Compromised |
| 6141 | A_33_P3262416 | ATPBD4   | Hs.107196 | ATP binding domain 4                                                       | Homo sapiens ATP binding domain 4 (ATPBD4), transcript variant 2, mRNA [NM_001141972]                                                                                                       | 2.47274 | down | 2.66263 | down | 10.49456    | 26.87047    | 3.42838    | 8.04942     | Compromised | Detected | Compromised | Compromised |
| 6142 | A_23_P97394   | BCAR3    | Hs.36958  | breast cancer anti-estrogen resistance 3                                   | Homo sapiens breast cancer anti-estrogen resistance 3 (BCAR3), mRNA [NM_003567]                                                                                                             | 2.47124 | down | 2.43393 | down | 3851.13230  | 9854.52800  | 2828.53880 | 6070.65530  | Detected    | Detected | Detected    | Detected    |
| 6143 | A_23_P415882  | TIMM50   | Hs.590956 | translocase of inner mitochondrial membrane 50 homolog (S. cerevisiae)     | Homo sapiens translocase of inner mitochondrial membrane 50 homolog (S. cerevisiae) (TIMM50), nuclear gene encoding mitochondrial protein, mRNA [NM_001001563]                              | 2.47029 | down | 2.52960 | down | 4650.21500  | 11894.73400 | 3940.98300 | 8790.66800  | Detected    | Detected | Detected    | Detected    |
| 6144 | A_23_P425502  | DONSON   | Hs.436341 | downstream neighbor of SON                                                 | Homo sapiens downstream neighbor of SON (DONSON), mRNA [NM_017613]                                                                                                                          | 2.46997 | down | 2.41261 | down | 547.40985   | 1400.02950  | 382.93063  | 814.65360   | Detected    | Detected | Detected    | Detected    |
| 6145 | A_33_P3299865 | HIST1H4K | Hs.528055 | histone cluster 1, H4k                                                     | Homo sapiens histone cluster 1, H4k (HIST1H4K), mRNA [NM_003541]                                                                                                                            | 2.46931 | down | 2.60466 | down | 320.21942   | 818.75934   | 325.13916  | 746.76715   | Detected    | Detected | Detected    | Detected    |
| 6146 | A_23_P309361  | C1orf59  | Hs.7962   | chromosome 1 open reading frame 59                                         | Homo sapiens chromosome 1 open reading frame 59 (C1orf59), transcript variant 1, mRNA [NM_144584]                                                                                           | 2.46858 | down | 2.53427 | down | 661.23160   | 1690.18140  | 513.56537  | 1147.66360  | Detected    | Detected | Detected    | Detected    |
| 6147 | A_33_P3239152 | RABEP2   | Hs.555978 | rabaptin, RAB GTPase binding effector protein 2                            | Homo sapiens rabaptin, RAB GTPase binding effector protein 2 (RABEP2), mRNA [NM_024616]                                                                                                     | 2.46764 | down | 2.87826 | down | 4558.49760  | 11647.59800 | 3990.33620 | 10127.57200 | Detected    | Detected | Detected    | Detected    |
| 6148 | A_33_P3411025 | ARHGAP19 | Hs.80305  | Rho GTPase activating protein 19                                           | Homo sapiens Rho GTPase activating protein 19 (ARHGAP19), mRNA [NM_032900]                                                                                                                  | 2.46761 | down | 2.54284 | down | 61.69612    | 157.64058   | 45.44716   | 101.90420   | Detected    | Detected | Detected    | Detected    |
| 6149 | A_33_P3267814 | MICAL3   | Hs.528024 | microtubule associated monooxygenase, calponin and LIM domain containing 3 | Homo sapiens microtubule associated monooxygenase, calponin and LIM domain containing 3 (MICAL3), transcript variant 2, mRNA [NM_001136004]                                                 | 2.46758 | down | 2.97611 | down | 153.45004   | 392.07620   | 82.32313   | 216.04135   | Detected    | Detected | Detected    | Detected    |
| 6150 | A_33_P3315929 | ROD1     | Hs.269988 | ROD1 regulator of differentiation 1 (S. pombe)                             | Homo sapiens ROD1 regulator of differentiation 1 (S. pombe) (ROD1), transcript variant 3, mRNA [NM_001163790]                                                                               | 2.46756 | down | 2.19899 | down | 81.58293    | 208.44910   | 69.26061   | 134.29942   | Detected    | Detected | Detected    | Detected    |
| 6151 | A_33_P3296333 | NTM      | Hs.504352 | neurotrimin                                                                | Homo sapiens neurotrimin (NTM), transcript variant 3, mRNA [NM_001144058]                                                                                                                   | 2.46276 | down | 2.84114 | down | 306.79260   | 782.34850   | 229.72618  | 575.52985   | Detected    | Detected | Detected    | Detected    |
| 6152 | A_23_P204286  | MGP      | Hs.365706 | matrix Gla protein                                                         | Homo sapiens matrix Gla protein (MGP), mRNA [NM_000900]                                                                                                                                     | 2.46244 | down | 2.43947 | down | 306.85180   | 782.39820   | 254.50783  | 547.47314   | Detected    | Detected | Detected    | Detected    |
| 6153 | A_24_P34545   | ING5     | Hs.529172 | inhibitor of growth family, member 5                                       | Homo sapiens inhibitor of growth family, member 5 (ING5), mRNA [NM_032329]                                                                                                                  | 2.46242 | down | 2.93772 | down | 109.24323   | 278.54086   | 106.71159  | 276.43106   | Detected    | Detected | Detected    | Detected    |
| 6154 | A_24_P40978   | CYHR1    | Hs.459379 | cysteine/histidine-rich 1                                                  | Homo sapiens cysteine/histidine-rich 1 (CYHR1), transcript variant 1, mRNA [NM_138496]                                                                                                      | 2.46226 | down | 3.27665 | down | 164.65154   | 419.78998   | 162.61520  | 469.84760   | Detected    | Detected | Detected    | Detected    |
| 6155 | A_23_P125624  | ACOT9    | Hs.298885 | acyl-CoA thioesterase 9                                                    | Homo sapiens acyl-CoA thioesterase 9 (ACOT9), transcript variant 1, mRNA [NM_001037171]                                                                                                     | 2.46205 | down | 2.33212 | down | 11937.86900 | 30433.82000 | 7223.85840 | 14855.45900 | Detected    | Detected | Detected    | Detected    |
| 6156 | A_23_P52219   | ERLIN1   | Hs.150087 | ER lipid raft associated 1                                                 | Homo sapiens ER lipid raft associated 1 (ERLIN1), mRNA [NM_006459]                                                                                                                          | 2.46181 | down | 2.60522 | down | 283.70856   | 723.20337   | 302.71564  | 695.41595   | Detected    | Detected | Detected    | Detected    |
| 6157 | A_32_P128656  | MID1     | Hs.27695  | midline 1 (Opitz/BBB syndrome)                                             | Homo sapiens midline 1 (Opitz/BBB syndrome) (MID1), transcript variant 1, mRNA [NM_000381]                                                                                                  | 2.46115 | down | 2.05541 | down | 37.14644    | 94.66491    | 29.05954   | 52.66860    | Detected    | Detected | Detected    | Detected    |
| 6158 | A_24_P219785  | CALM3    | Hs.515487 | calmodulin 3 (phosphorylase kinase, delta)                                 | Homo sapiens calmodulin 3 (phosphorylase kinase, delta) (CALM3), mRNA [NM_005184]                                                                                                           | 2.46104 | down | 2.61892 | down | 1654.72660  | 4216.75900  | 2210.56570 | 5104.95400  | Detected    | Detected | Detected    | Detected    |
| 6159 | A_23_P48561   | EFS      | Hs.24587  | embryonal Fyn-associated substrate                                         | Homo sapiens embryonal Fyn-associated substrate (EFS), transcript variant 1, mRNA [NM_005864]                                                                                               | 2.46074 | down | 2.56792 | down | 1005.01110  | 2560.76500  | 913.70560  | 2068.96200  | Detected    | Detected | Detected    | Detected    |
| 6160 | A_33_P3354935 | CSF1     | Hs.591402 | colony stimulating factor 1 (macrophage)                                   | Homo sapiens colony stimulating factor 1 (macrophage) (CSF1), transcript variant 4, mRNA [NM_172212]                                                                                        | 2.46054 | down | 2.00704 | down | 1645.12980  | 4191.43900  | 475.55264  | 841.62700   | Detected    | Detected | Detected    | Detected    |
| 6161 | A_23_P205074  | SLC46A3  | Hs.117167 | solute carrier family 46, member 3                                         | Homo sapiens solute carrier family 46, member 3 (SLC46A3), transcript variant 1, mRNA [NM_181785]                                                                                           | 2.45964 | down | 2.80065 | down | 46.10125    | 117.41350   | 47.50271   | 117.31210   | Detected    | Detected | Detected    | Detected    |
| 6162 | A_33_P3589722 | ATM      | Hs.367437 | ataxia telangiectasia mutated                                              | Homo sapiens ataxia telangiectasia mutated (ATM), transcript variant 1, mRNA [NM_000051]                                                                                                    | 2.45949 | down | 2.23899 | down | 99.47134    | 253.32375   | 102.36593  | 202.10307   | Detected    | Detected | Detected    | Detected    |
| 6163 | A_23_P208293  | PVRL2    | Hs.655455 | poliovirus receptor-related 2 (herpesvirus entry mediator B)               | Homo sapiens poliovirus receptor-related 2 (herpesvirus entry mediator B) (PVRL2), transcript variant delta, mRNA [NM_001042724]                                                            | 2.45907 | down | 2.40877 | down | 1186.22350  | 3020.43800  | 859.28796  | 1825.15490  | Detected    | Detected | Detected    | Detected    |
| 6164 | A_23_P40240   | CTSZ     | Hs.252549 | cathepsin Z                                                                | Homo sapiens cathepsin Z (CTSZ), mRNA [NM_0011336]                                                                                                                                          | 2.45895 | down | 3.07372 | down | 2796.76250  | 7120.95650  | 469.61874  | 1272.84570  | Detected    | Detected | Detected    | Detected    |
| 6165 | A_33_P3251347 |          | Hs.188256 |                                                                            | Mitogen-activated protein kinase kinase kinase 7-interacting protein 3 (TAK1-binding protein 3)(NF-kappa-B-activating protein 1) [Source:UniProtKB/Swiss-Prot;Acc:Q8N5C8] [ENST00000378928] | 2.45885 | down | 1.48845 | down | 6.65649     | 16.94770    | 8.53700    | 11.20479    | Compromised | Detected | Compromised | Compromised |
| 6166 | A_23_P104607  | PSMC3    | Hs.250758 | proteasome (prosome, macropain) 26S subunit, ATPase, 3                     | Homo sapiens proteasome (prosome, macropain) 26S subunit, ATPase, 3 (PSMC3), mRNA [NM_002804]                                                                                               | 2.45860 | down | 2.73951 | down | 5250.62900  | 13366.92400 | 5814.00930 | 14044.76000 | Detected    | Detected | Detected    | Detected    |
| 6167 | A_33_P3234849 | UTRN     | Hs.133135 | utrophin                                                                   | Homo sapiens utrophin (UTRN), mRNA [NM_007124]                                                                                                                                              | 2.45824 | down | 1.05040 | down | 9.02385     | 22.96936    | 17.02772   | 15.77162    | Compromised | Detected | Detected    | Detected    |

|      |               |           |           |                                                                                         |                                                                                                                                                                                                                                      |         |      |         |      |             |             |             |             |             |          |             |             |
|------|---------------|-----------|-----------|-----------------------------------------------------------------------------------------|--------------------------------------------------------------------------------------------------------------------------------------------------------------------------------------------------------------------------------------|---------|------|---------|------|-------------|-------------|-------------|-------------|-------------|----------|-------------|-------------|
| 6168 | A_33_P3382588 | WNT1      | Hs.248164 | wingless-type MMTV integration site family, member 1                                    | Homo sapiens wingless-type MMTV integration site family, member 1 (WNT1), mRNA [NM_005430]                                                                                                                                           | 2.45764 | down | 2.46902 | down | 7.53154     | 19.16614    | 5.79328     | 12.61290    | Compromised | Detected | Compromised | Compromised |
| 6169 | A_23_P106299  | SERF2     | Hs.424126 | small EDRK-rich factor 2                                                                | Homo sapiens small EDRK-rich factor 2 (SERF2), mRNA [NM_001018108]                                                                                                                                                                   | 2.45687 | down | 2.22477 | down | 13772.82100 | 35037.86300 | 15986.01100 | 31361.05700 | Detected    | Detected | Detected    | Detected    |
| 6170 | A_23_P354387  | MYOF      | Hs.602086 | myoferlin                                                                               | Homo sapiens myoferlin (MYOF), transcript variant 1, mRNA [NM_013451]                                                                                                                                                                | 2.45657 | down | 2.42893 | down | 8086.66940  | 20569.89800 | 5400.19240  | 11566.19100 | Detected    | Detected | Detected    | Detected    |
| 6171 | A_23_P52311   | TAF5      | Hs.96103  | TAF5 RNA polymerase II, TATA box binding protein (TBP)-associated factor, 100kDa        | Homo sapiens TAF5 RNA polymerase II, TATA box binding protein (TBP)-associated factor, 100kDa (TAF5), mRNA [NM_006951]                                                                                                               | 2.45615 | down | 2.29899 | down | 97.32083    | 247.51009   | 66.78814    | 135.44788   | Detected    | Detected | Detected    | Detected    |
| 6172 | A_24_P314681  |           | Hs.454452 |                                                                                         | BX281397 Soares.NFL.T.GBC.S1<br>Homo sapiens cDNA clone IMAGE998G075145 ; IMAGE2087454, mRNA sequence [BX281397]                                                                                                                     | 2.45537 | down | 1.92542 | down | 65.38776    | 166.24452   | 42.82311    | 72.70578    | Detected    | Detected | Detected    | Detected    |
| 6173 | A_23_P7655    | BNIP1     | Hs.145726 | BCL2/adenovirus E1B 19kDa interacting protein 1                                         | Homo sapiens BCL2/adenovirus E1B 19kDa interacting protein 1 (BNIP1), transcript variant BNIP1-a, mRNA [NM_013978]                                                                                                                   | 2.45452 | down | 2.53291 | down | 540.90314   | 1374.73800  | 613.63184   | 1370.54330  | Detected    | Detected | Detected    | Detected    |
| 6174 | A_33_P3214625 | INPP4B    | Hs.658245 | inositol polyphosphate-4-phosphatase, type II, 105kDa                                   | Homo sapiens inositol polyphosphate-4-phosphatase, type II, 105kDa (INPP4B), transcript variant 1, mRNA [NM_003866]                                                                                                                  | 2.45396 | down | 3.01445 | down | 30.58667    | 77.66917    | 17.96800    | 47.76100    | Detected    | Detected | Detected    | Detected    |
| 6175 | A_23_P401675  | MARVELD2  | Hs.657687 | MARVEL domain containing 2                                                              | Homo sapiens MARVEL domain containing 2 (MARVELD2), transcript variant 2, mRNA [NM_144724]                                                                                                                                           | 2.45302 | down | 2.15381 | down | 171.31157   | 435.13257   | 128.06538   | 243.22343   | Detected    | Detected | Detected    | Detected    |
| 6176 | A_33_P3254412 | ULK2      | Hs.168762 | unc-51-like kinase 2 (C. elegans)                                                       | Homo sapiens unc-51-like kinase 2 (C. elegans) (ULK2), transcript variant 1, mRNA [NM_014683]                                                                                                                                        | 2.45233 | down | 2.49249 | down | 115.71198   | 293.82560   | 70.14289    | 154.16388   | Detected    | Detected | Detected    | Detected    |
| 6177 | A_24_P317450  | OSTCL     | Hs.487035 | oligosaccharyltransferase complex subunit-like                                          | Homo sapiens oligosaccharyltransferase complex subunit-like (OSTCL), non-coding RNA [NR_028496]                                                                                                                                      | 2.45209 | down | 1.59725 | down | 4424.02900  | 11232.77800 | 1530.06500  | 2154.99980  | Detected    | Detected | Detected    | Detected    |
| 6178 | A_24_P377499  | OSBPL3    | Hs.520259 | oxysterol binding protein-like 3                                                        | Homo sapiens oxysterol binding protein-like 3 (OSBPL3), transcript variant 1, mRNA [NM_013550]                                                                                                                                       | 2.45101 | down | 2.22136 | down | 609.49420   | 1546.85000  | 458.33075   | 897.76680   | Detected    | Detected | Detected    | Detected    |
| 6179 | A_24_P134235  | KHSRP     | Hs.91142  | KH-type splicing regulatory protein                                                     | Homo sapiens KH-type splicing regulatory protein (KHSRP), mRNA [NM_003685]                                                                                                                                                           | 2.45093 | down | 2.22758 | down | 72.53574    | 184.08406   | 94.75519    | 186.12355   | Detected    | Detected | Detected    | Detected    |
| 6180 | A_23_P26522   | AQP8      | Hs.176658 | aquaporin 8                                                                             | Homo sapiens aquaporin 8 (AQP8), mRNA [NM_001169]                                                                                                                                                                                    | 2.45038 | down | 2.17691 | down | 74.23408    | 188.35146   | 48.04609    | 92.22843    | Detected    | Detected | Detected    | Detected    |
| 6181 | A_24_P389959  | COPZ1     | Hs.505652 | coatamer protein complex, subunit zeta 1                                                | Homo sapiens coatamer protein complex, subunit zeta 1 (COPZ1), mRNA [NM_016057]                                                                                                                                                      | 2.45001 | down | 2.92838 | down | 2498.51590  | 6338.44530  | 2245.01030  | 5797.11230  | Detected    | Detected | Detected    | Detected    |
| 6182 | A_23_P20122   | ZC3HAV1   | Hs.133512 | zinc finger CCHH-type, antiviral 1                                                      | Homo sapiens zinc finger CCHH-type, antiviral 1 (ZC3HAV1), transcript variant 2, mRNA [NM_024625]                                                                                                                                    | 2.44977 | down | 2.33915 | down | 104.76318   | 265.74606   | 75.86346    | 156.47876   | Detected    | Detected | Detected    | Detected    |
| 6183 | A_33_P3282973 |           |           |                                                                                         | Brain and acute leukemia cytoplasmic protein [Source:UniProtKB/Swiss-Prot;Acc:Q6WX53] [ENST00000395861]                                                                                                                              | 2.44959 | down | 3.51207 | down | 127.08301   | 322.33957   | 113.78412   | 352.37973   | Detected    | Detected | Detected    | Detected    |
| 6184 | A_33_P3214310 | FOXP1     | Hs.431498 | forkhead box P1                                                                         | Homo sapiens forkhead box P1 (FOXP1), transcript variant 2, mRNA [NM_001012505]                                                                                                                                                      | 2.44877 | down | 4.86165 | down | 85.96473    | 217.97195   | 36.61164    | 156.95260   | Detected    | Detected | Detected    | Detected    |
| 6185 | A_33_P3397399 |           | Hs.500067 |                                                                                         | Serine/threonine-protein phosphatase 2B catalytic subunit beta isoform (EC 3.1.3.16)(Calmodulin-dependent calcineurin A subunit beta isoform)(CAM-PP2A catalytic subunit) [Source:UniProtKB/Swiss-Prot;Acc:P16298] [ENST00000394822] | 2.44850 | down | 2.59471 | down | 256.80356   | 651.08010   | 268.57877   | 614.50616   | Detected    | Detected | Detected    | Detected    |
| 6186 | A_33_P3308050 | EIF4E2    | Hs.292026 | eukaryotic translation initiation factor 4E family member 2                             | Homo sapiens eukaryotic translation initiation factor 4E family member 2 (EIF4E2), mRNA [NM_004846]                                                                                                                                  | 2.44765 | down | 2.40394 | down | 5805.62940  | 14714.00200 | 6912.24270  | 14652.37800 | Detected    | Detected | Detected    | Detected    |
| 6187 | A_32_P108889  | DCLK1     | Hs.507755 | doublecortin-like kinase 1                                                              | Homo sapiens doublecortin-like kinase 1 (DCLK1), mRNA [NM_004734]                                                                                                                                                                    | 2.44764 | down | 1.18740 | down | 9.48958     | 24.00001    | 8.10572     | 8.48703     | Compromised | Detected | Compromised | Compromised |
| 6188 | A_24_P565556  | ALG1      | Hs.592086 | asparagine-linked glycosylation 1, beta-1,4-mannosyltransferase homolog (S. cerevisiae) | Homo sapiens asparagine-linked glycosylation 1, beta-1,4-mannosyltransferase homolog (S. cerevisiae) (ALG1), mRNA [NM_019109]                                                                                                        | 2.44546 | down | 2.73346 | down | 357.80180   | 905.50960   | 97.59224    | 235.23062   | Detected    | Detected | Detected    | Detected    |
| 6189 | A_23_P2041    | MICALCL   | Hs.128196 | MICAL C-terminal like                                                                   | Homo sapiens MICAL C-terminal like (MICALCL), mRNA [NM_002867]                                                                                                                                                                       | 2.44502 | down | 2.26584 | down | 113.37088   | 287.02362   | 94.48461    | 188.78000   | Detected    | Detected | Detected    | Detected    |
| 6190 | A_33_P3273552 | KRT83     | Hs.720768 | keratin 83                                                                              | Homo sapiens keratin 83 (KRT83), mRNA [NM_002282]                                                                                                                                                                                    | 2.44217 | down | 3.12917 | down | 36.98336    | 93.52235    | 25.46344    | 70.26061    | Detected    | Detected | Detected    | Detected    |
| 6191 | A_33_P3385002 | TUBB2A    | Hs.654543 | tubulin, beta 2A                                                                        | Homo sapiens tubulin, beta 2A (TUBB2A), mRNA [NM_001069]                                                                                                                                                                             | 2.44205 | down | 2.73301 | down | 2988.80080  | 7557.59670  | 3583.82470  | 8636.80300  | Detected    | Detected | Detected    | Detected    |
| 6192 | A_33_P3884179 | LOC150759 | Hs.651352 | hypothetical protein LOC150759                                                          | Homo sapiens cDNA FLJ33034 fis, clone THYMU2000236 [AK057596]                                                                                                                                                                        | 2.44203 | down | 2.13420 | down | 224.85059   | 568.56340   | 186.91480   | 351.75833   | Detected    | Detected | Detected    | Detected    |
| 6193 | A_33_P3345782 |           |           |                                                                                         | Coiled-coil domain-containing protein 88B (Brain leucine zipper domain-containing protein)Hook-related protein 3(HLRP3) [Source:UniProtKB/Swiss-Prot;Acc:A6NC98] [ENST00000318701]                                                   | 2.44073 | down | 1.06520 | down | 9.68236     | 24.46997    | 4.07507     | 3.82765     | Compromised | Detected | Compromised | Compromised |
| 6194 | A_23_P31444   | ERVWE1    |           | endogenous retroviral family W, env(G7), member 1                                       | Homo sapiens endogenous retroviral family W, env(G7), member 1 (ERVWE1), transcript variant 1, mRNA [NM_014590]                                                                                                                      | 2.44065 | down | 1.18321 | down | 6.86740     | 17.35525    | 2.88383     | 3.00881     | Compromised | Detected | Compromised | Compromised |
| 6195 | A_33_P3209869 | TCP11L1   | Hs.655341 | t-complex 11 (mouse)-like 1                                                             | Homo sapiens t-complex 11 (mouse)-like 1 (TCP11L1), transcript variant 1, mRNA [NM_018393]                                                                                                                                           | 2.44022 | down | 2.53542 | down | 942.49210   | 2381.43600  | 672.15300   | 1502.73730  | Detected    | Detected | Detected    | Detected    |



|      |               |              |           |                                                                                                   |                                                                                                                                                                                                                                                                                                                     |         |      |         |      |            |             |            |             |          |          |             |          |
|------|---------------|--------------|-----------|---------------------------------------------------------------------------------------------------|---------------------------------------------------------------------------------------------------------------------------------------------------------------------------------------------------------------------------------------------------------------------------------------------------------------------|---------|------|---------|------|------------|-------------|------------|-------------|----------|----------|-------------|----------|
| 6196 | A_33_P3321611 | PHACTR4      | Hs.225641 | phosphatase and actin regulator 4                                                                 | Homo sapiens phosphatase and actin regulator 4 (PHACTR4), transcript variant 1, mRNA [NM_001048183]                                                                                                                                                                                                                 | 2.43938 | down | 1.30154 | down | 42.61089   | 107.62991   | 70.58269   | 81.00669    | Detected | Detected | Detected    | Detected |
| 6197 | A_23_P166336  | TMEM191A     | Hs.546454 | transmembrane protein 191A                                                                        | Homo sapiens transmembrane protein 191A (TMEM191A), non-coding RNA [NR_026815]                                                                                                                                                                                                                                      | 2.43926 | down | 2.34592 | down | 432.18880  | 1091.60310  | 501.51700  | 1037.44410  | Detected | Detected | Detected    | Detected |
| 6198 | A_23_P47790   | METTL1       | Hs.42957  | methyltransferase like 1                                                                          | Homo sapiens methyltransferase like 1 (METTL1), transcript variant 1, mRNA [NM_005371]                                                                                                                                                                                                                              | 2.43859 | down | 2.59265 | down | 911.14220  | 2300.69380  | 1117.72270 | 2555.30640  | Detected | Detected | Detected    | Detected |
| 6199 | A_33_P3321050 | PHACTR2      | Hs.102471 | phosphatase and actin regulator 2                                                                 | Homo sapiens phosphatase and actin regulator 2 (PHACTR2), transcript variant 2, mRNA [NM_001100165]                                                                                                                                                                                                                 | 2.43760 | down | 2.53833 | down | 223.10963  | 563.13635   | 196.07315  | 438.86594   | Detected | Detected | Detected    | Detected |
| 6200 | A_23_P65240   | COL4A1       | Hs.17441  | collagen, type IV, alpha 1                                                                        | Homo sapiens collagen, type IV, alpha 1 (COL4A1), mRNA [NM_001845]                                                                                                                                                                                                                                                  | 2.43742 | down | 2.49194 | down | 2371.95600 | 5986.46340  | 2028.57760 | 4457.52900  | Detected | Detected | Detected    | Detected |
| 6201 | A_23_P307328  | WHSC1        | Hs.113876 | Wolf-Hirschhorn syndrome candidate 1                                                              | Homo sapiens Wolf-Hirschhorn syndrome candidate 1 (WHSC1), transcript variant 8, mRNA [NM_007331]                                                                                                                                                                                                                   | 2.43615 | down | 2.24663 | down | 585.89140  | 1477.93330  | 478.07068  | 947.08563   | Detected | Detected | Detected    | Detected |
| 6202 | A_23_P350234  | UBE2NL       | Hs.585177 | ubiquitin-conjugating enzyme E2N-like                                                             | Homo sapiens ubiquitin-conjugating enzyme E2N-like (UBE2NL), mRNA [NM_001012969]                                                                                                                                                                                                                                    | 2.43280 | down | 2.56071 | down | 324.17320  | 816.61346   | 380.47205  | 859.10900   | Detected | Detected | Detected    | Detected |
| 6203 | A_33_P3417620 |              |           |                                                                                                   | U2 small nuclear ribonucleoprotein auxiliary factor 35 kDa subunit-related protein 2 (U2RNUJ2) small nuclear RNA auxiliary factor 1-like 2(COCH type zinc finger, RNA-binding motif and serine/arginine rich protein 2)(Renal carcinoma antigen NY-RN-20) [Source:UniProtKB/Swiss-Prot;Acc:Q15696] [ENST0000380308] | 2.43096 | down | 2.36823 | down | 126.49808  | 318.41574   | 97.35738   | 203.31012   | Detected | Detected | Detected    | Detected |
| 6204 | A_24_P193295  | RAB15        | Hs.512492 | RAB15, member RAS oncogene family                                                                 | Homo sapiens RAB15, member RAS oncogene family (RAB15), mRNA [NM_198686]                                                                                                                                                                                                                                            | 2.43028 | down | 2.49759 | down | 2195.66300 | 5525.28170  | 1646.90120 | 3627.06000  | Detected | Detected | Detected    | Detected |
| 6205 | A_23_P30805   | HIST1H4J     | Hs.278483 | histone cluster 1, H4j                                                                            | Homo sapiens histone cluster 1, H4j (HIST1H4J), mRNA [NM_021968]                                                                                                                                                                                                                                                    | 2.42999 | down | 2.53875 | down | 363.35350  | 914.25300   | 387.43097  | 867.31960   | Detected | Detected | Detected    | Detected |
| 6206 | A_23_P112159  | EIF2C2       | Hs.449415 | eukaryotic translation initiation factor 2C, 2                                                    | Homo sapiens eukaryotic translation initiation factor 2C, 2 (EIF2C2), transcript variant 1, mRNA [NM_012154]                                                                                                                                                                                                        | 2.42844 | down | 2.58673 | down | 838.95300  | 2109.58810  | 715.51850  | 1632.06570  | Detected | Detected | Detected    | Detected |
| 6207 | A_23_P394395  | JPH2         | Hs.441737 | junctophilin 2                                                                                    | Homo sapiens junctophilin 2 (JPH2), transcript variant 1, mRNA [NM_020433]                                                                                                                                                                                                                                          | 2.42842 | down | 3.28445 | down | 60.57504   | 152.31790   | 60.70457   | 175.81221   | Detected | Detected | Detected    | Detected |
| 6208 | A_33_P3288589 | LOC100128055 | Hs.710623 | hypothetical protein LOC100128055                                                                 | PREDICTED: Homo sapiens hypothetical protein LOC100128055 (LOC100128055), mRNA [XM_001720585]                                                                                                                                                                                                                       | 2.42831 | down | 4.02652 | down | 25.75042   | 64.74716    | 15.80330   | 56.11041    | Detected | Detected | Detected    | Detected |
| 6209 | A_23_P21033   | GMPS         | Hs.591314 | guanine monophosphate synthetase                                                                  | Homo sapiens guanine monophosphate synthetase (GMPS), mRNA [NM_003875]                                                                                                                                                                                                                                              | 2.42815 | down | 2.51394 | down | 5934.48600 | 14920.77700 | 4415.37800 | 9787.88000  | Detected | Detected | Detected    | Detected |
| 6210 | A_24_P277747  | CNPY3        | Hs.414099 | canopy 3 homolog (zebrafish)                                                                      | Homo sapiens canopy 3 homolog (zebrafish) (CNPY3), mRNA [NM_006586]                                                                                                                                                                                                                                                 | 2.42727 | down | 2.33822 | down | 96.34708   | 242.15308   | 104.92540  | 216.33717   | Detected | Detected | Detected    | Detected |
| 6211 | A_33_P3267320 | RFT1         | Hs.720810 | RFT1 homolog (S. cerevisiae)                                                                      | Homo sapiens RFT1 homolog (S. cerevisiae) (RFT1), mRNA [NM_052859]                                                                                                                                                                                                                                                  | 2.42664 | down | 2.39920 | down | 37.89586   | 95.22031    | 44.33249   | 93.78940    | Detected | Detected | Detected    | Detected |
| 6212 | A_23_P76890   | UCHL3        | Hs.162241 | ubiquitin carboxyl-terminal esterase L3 (ubiquitin thiolesterase)                                 | Homo sapiens ubiquitin carboxyl-terminal esterase L3 (ubiquitin thiolesterase) (UCHL3), mRNA [NM_006002]                                                                                                                                                                                                            | 2.42654 | down | 2.27245 | down | 3284.78100 | 8253.27900  | 2586.29100 | 5182.47700  | Detected | Detected | Detected    | Detected |
| 6213 | A_23_P333063  | SMARCE1      | Hs.643780 | SWI/SNF related, matrix associated, actin dependent regulator of chromatin, subfamily e, member 1 | Homo sapiens SWI/SNF related, matrix associated, actin dependent regulator of chromatin, subfamily e, member 1 (SMARCE1), mRNA [NM_003079]                                                                                                                                                                          | 2.42637 | down | 2.39365 | down | 885.01520  | 2223.51830  | 554.19660  | 1169.74120  | Detected | Detected | Detected    | Detected |
| 6214 | A_23_P70448   | HIST1H1A     | Hs.150206 | histone cluster 1, H1a                                                                            | Homo sapiens histone cluster 1, H1a (HIST1H1A), mRNA [NM_005325]                                                                                                                                                                                                                                                    | 2.42598 | down | 2.85658 | down | 165.76979  | 416.41428   | 141.29810  | 355.91653   | Detected | Detected | Detected    | Detected |
| 6215 | A_24_P598406  | RNF216L      | Hs.520636 | ring finger protein 216-like                                                                      | Homo sapiens ring finger protein 216-like (RNF216L), transcript variant 1, non-coding RNA [NR_023384]                                                                                                                                                                                                               | 2.42518 | down | 2.49369 | down | 4408.47460 | 11070.47300 | 4525.04350 | 9950.18200  | Detected | Detected | Detected    | Detected |
| 6216 | A_24_P318967  | PDXK         | Hs.284491 | pyridoxal (pyridoxine, vitamin B6) kinase                                                         | Homo sapiens pyridoxal (pyridoxine, vitamin B6) kinase (PDXK), mRNA [NM_003681]                                                                                                                                                                                                                                     | 2.42472 | down | 2.68120 | down | 2626.02080 | 6593.15900  | 3275.44020 | 7743.99500  | Detected | Detected | Detected    | Detected |
| 6217 | A_24_P406245  | PMS2L2       | Hs.720746 | postmeiotic segregation increased 2-like 2 pseudogene                                             | Homo sapiens cDNA clone IMAGE3456494, partial cds [BC010535]                                                                                                                                                                                                                                                        | 2.42246 | down | 2.55122 | down | 124.00018  | 311.03650   | 101.31708  | 227.92752   | Detected | Detected | Detected    | Detected |
| 6218 | A_24_P914513  | BCKDHB       | Hs.654441 | branched chain keto acid dehydrogenase E1, beta polypeptide                                       | Homo sapiens branched chain keto acid dehydrogenase E1, beta polypeptide (BCKDHB), nuclear gene encoding mitochondrial protein, transcript variant 1, mRNA [NM_183050]                                                                                                                                              | 2.42222 | down | 2.81725 | down | 33.29901   | 83.51744    | 10.99819   | 27.32194    | Detected | Detected | Compromised | Detected |
| 6219 | A_24_P92163   |              |           |                                                                                                   |                                                                                                                                                                                                                                                                                                                     | 2.41832 | down | 2.60000 | down | 91.78154   | 229.82756   | 70.62071   | 161.90894   | Detected | Detected | Detected    | Detected |
| 6220 | A_33_P3256685 | TTF2         | Hs.486818 | transcription termination factor, RNA polymerase II                                               | Homo sapiens transcription termination factor, RNA polymerase II (TTF2), mRNA [NM_003594]                                                                                                                                                                                                                           | 2.41772 | down | 2.39616 | down | 521.99020  | 1306.77600  | 371.38846  | 784.70984   | Detected | Detected | Detected    | Detected |
| 6221 | A_23_P150693  | FJX1         | Hs.39384  | four jointed box 1 (Drosophila)                                                                   | Homo sapiens four jointed box 1 (Drosophila) (FJX1), mRNA [NM_014344]                                                                                                                                                                                                                                               | 2.41697 | down | 2.43571 | down | 5658.07600 | 14160.33700 | 4991.75600 | 10721.23500 | Detected | Detected | Detected    | Detected |
| 6222 | A_33_P3226955 |              |           |                                                                                                   | Neuropilin-1 Precursor (Vascular endothelial cell growth factor 165 receptor)(CD304 antigen) [Source:UniProtKB/Swiss-Prot;Acc:O14786] [ENST00000455749]                                                                                                                                                             | 2.41667 | down | 2.35727 | down | 377.16710  | 943.81070   | 323.96454  | 673.40000   | Detected | Detected | Detected    | Detected |

|      |               |           |           |                                                                     |                                                                                                                             |         |      |         |      |             |             |             |             |             |          |             |             |
|------|---------------|-----------|-----------|---------------------------------------------------------------------|-----------------------------------------------------------------------------------------------------------------------------|---------|------|---------|------|-------------|-------------|-------------|-------------|-------------|----------|-------------|-------------|
| 6223 | A_23_P163458  | EHD4      | Hs.143703 | EH-domain containing 4                                              | Homo sapiens EH-domain containing 4 (EHD4), mRNA [NM_139265]                                                                | 2.41621 | down | 2.32343 | down | 978.82874   | 2448.91650  | 1185.44430  | 2428.71170  | Detected    | Detected | Detected    | Detected    |
| 6224 | A_23_P25019   | PRIM1     | Hs.534339 | primase, DNA, polypeptide 1 (49kDa)                                 | Homo sapiens primase, DNA, polypeptide 1 (49kDa) (PRIM1), mRNA [NM_000946]                                                  | 2.41586 | down | 2.44769 | down | 295.59567   | 739.43870   | 311.15802   | 671.58673   | Detected    | Detected | Detected    | Detected    |
| 6225 | A_24_P275073  | ADAMTS14  | Hs.352156 | ADAM metalloproteinase with thrombospondin type 1 motif, 14         | Homo sapiens ADAM metalloproteinase with thrombospondin type 1 motif, 14 (ADAMTS14), transcript variant 1, mRNA [NM_139155] | 2.41412 | down | 2.96642 | down | 68.63380    | 171.56543   | 21.49896    | 56.23612    | Detected    | Detected | Detected    | Detected    |
| 6226 | A_23_P166159  | PDRG1     | Hs.435755 | p53 and DNA-damage regulated 1                                      | Homo sapiens p53 and DNA-damage regulated 1 (PDRG1), mRNA [NM_030815]                                                       | 2.41342 | down | 2.62313 | down | 1911.74560  | 4777.44630  | 2053.05050  | 4748.81640  | Detected    | Detected | Detected    | Detected    |
| 6227 | A_24_P219286  | LRRCS7    | Hs.234681 | leucine rich repeat containing 57                                   | Homo sapiens leucine rich repeat containing 57 (LRRCS7), mRNA [NM_153260]                                                   | 2.41312 | down | 2.43587 | down | 526.00540   | 1314.32510  | 322.48877   | 692.68340   | Detected    | Detected | Detected    | Detected    |
| 6228 | A_33_P3273369 | SH3BP4    | Hs.516777 | SH3-domain binding protein 4                                        | Homo sapiens SH3-domain binding protein 4 (SH3BP4), mRNA [NM_014521]                                                        | 2.41302 | down | 2.26227 | down | 79.81108    | 199.41457   | 107.49062   | 214.42757   | Detected    | Detected | Detected    | Detected    |
| 6229 | A_23_P138168  | CNN3      | Hs.483454 | calponin 3, acidic                                                  | Homo sapiens calponin 3, acidic (CNN3), mRNA [NM_001839]                                                                    | 2.41146 | down | 2.44425 | down | 1373.70430  | 3430.09280  | 1432.24460  | 3086.94630  | Detected    | Detected | Detected    | Detected    |
| 6230 | A_23_P256470  | NPY       | Hs.1832   | neuropeptide Y                                                      | Homo sapiens neuropeptide Y (NPY), mRNA [NM_000905]                                                                         | 2.41116 | down | 1.55344 | down | 19.79165    | 49.41306    | 22.13791    | 30.32477    | Detected    | Detected | Detected    | Detected    |
| 6231 | A_23_P84000   | CACNG2    | Hs.670146 | calcium channel, voltage-dependent, gamma subunit 2                 | Homo sapiens calcium channel, voltage-dependent, gamma subunit 2 (CACNG2), mRNA [NM_006078]                                 | 2.40957 | down | 1.00489 | down | 17.05386    | 42.54961    | 7.66197     | 6.78929     | Detected    | Detected | Compromised | Compromised |
| 6232 | A_23_P208698  | GYS1      | Hs.386225 | glycogen synthase 1 (muscle)                                        | Homo sapiens glycogen synthase 1 (muscle) (GYS1), transcript variant 1, mRNA [NM_002103]                                    | 2.40957 | down | 2.41668 | down | 1551.61300  | 3871.28860  | 1303.96900  | 2778.76400  | Detected    | Detected | Detected    | Detected    |
| 6233 | A_24_P215785  | ATP10A    | Hs.659258 | ATPase, class V, type 10A                                           | Homo sapiens ATPase, class V, type 10A (ATP10A), mRNA [NM_024490]                                                           | 2.40682 | down | 2.42874 | down | 1506.77780  | 3755.14230  | 1250.31460  | 2677.72880  | Detected    | Detected | Detected    | Detected    |
| 6234 | A_23_P210726  | CDC25B    | Hs.153752 | cell division cycle 25 homolog B (S. pombe)                         | Homo sapiens cell division cycle 25 homolog B (S. pombe) (CDC25B), transcript variant 1, mRNA [NM_021873]                   | 2.40583 | down | 2.95091 | down | 3435.34380  | 8557.93200  | 2537.57470  | 6602.99000  | Detected    | Detected | Detected    | Detected    |
| 6235 | A_32_P70818   | PAX9      | Hs.132576 | paired box 9                                                        | Homo sapiens paired box 9 (PAX9), mRNA [NM_006194]                                                                          | 2.40500 | down | 1.83358 | down | 21.34461    | 53.15400    | 18.21684    | 29.45358    | Detected    | Detected | Detected    | Detected    |
| 6236 | A_23_P356021  | FANCB     | Hs.554740 | Fanconi anemia, complementation group B                             | Homo sapiens Fanconi anemia, complementation group B (FANCB), transcript variant 1, mRNA [NM_001018113]                     | 2.40246 | down | 1.75269 | down | 19.22428    | 47.82335    | 18.66384    | 28.84499    | Detected    | Detected | Detected    | Detected    |
| 6237 | A_33_P3219121 |           |           |                                                                     |                                                                                                                             | 2.40111 | down | 1.46226 | down | 14.62771    | 36.36814    | 22.40896    | 28.89436    | Detected    | Detected | Detected    | Detected    |
| 6238 | A_23_P399897  | KY        | Hs.146730 | kyphoscoliosis peptidase                                            | Homo sapiens kyphoscoliosis peptidase (KY), mRNA [NM_178554]                                                                | 2.40100 | down | 2.76878 | down | 9.27688     | 23.06360    | 6.75571     | 16.49399    | Compromised | Detected | Compromised | Detected    |
| 6239 | A_33_P3258997 | TRMT2B    | Hs.496501 | TRM2 tRNA methyltransferase 2 homolog B (S. cerevisiae)             | Homo sapiens TRM2 tRNA methyltransferase 2 homolog B (S. cerevisiae) (TRMT2B), mRNA [NM_024917]                             | 2.40022 | down | 2.54100 | down | 48.14915    | 119.66649   | 47.86802    | 107.25458   | Detected    | Detected | Detected    | Detected    |
| 6240 | A_23_P250212  | PRAGMIN   | Hs.657673 | homolog of rat pragra of Rnd2                                       | Homo sapiens homolog of rat pragra of Rnd2 (PRAGMIN), mRNA [NM_001080626]                                                   | 2.40010 | down | 2.48642 | down | 697.69700   | 1733.92370  | 574.19714   | 1258.92910  | Detected    | Detected | Detected    | Detected    |
| 6241 | A_23_P82959   | FOXH1     | Hs.708365 | forkhead box H1                                                     | Homo sapiens forkhead box H1 (FOXH1), mRNA [NM_003923]                                                                      | 2.39986 | down | 2.42303 | down | 135.31789   | 336.25873   | 94.61042    | 202.14550   | Detected    | Detected | Detected    | Detected    |
| 6242 | A_23_P139600  | RASAL1    | Hs.528693 | RAS protein activator like 1 (GAP1 like)                            | Homo sapiens RAS protein activator like 1 (GAP1 like) (RASAL1), mRNA [NM_004658]                                            | 2.39911 | down | 3.77247 | down | 110.68571   | 274.96307   | 90.93790    | 302.50778   | Detected    | Detected | Detected    | Detected    |
| 6243 | A_23_P420551  | CIT       | Hs.119594 | citron (rho-interacting, serine/threonine kinase 21)                | Homo sapiens citron (rho-interacting, serine/threonine kinase 21) (CIT), mRNA [NM_007174]                                   | 2.39898 | down | 2.40431 | down | 4550.50700  | 11303.68900 | 3538.14010  | 7501.21500  | Detected    | Detected | Detected    | Detected    |
| 6244 | A_24_P32215   |           |           |                                                                     | Putative uncharacterized protein ARL4P [Source:UniProtKB/TrEMBL;Acc: A6ND06] [ENST00000242475]                              | 2.39883 | down | 1.33513 | down | 87.32372    | 216.90236   | 11.01740    | 12.97082    | Detected    | Detected | Compromised | Detected    |
| 6245 | A_24_P316234  | LOC643475 | Hs.675960 | FLJ00409 protein                                                    | Homo sapiens mRNA for FLJ00409 protein [AK090485]                                                                           | 2.39845 | down | 2.02613 | down | 14.60104    | 36.26165    | 8.77799     | 15.68298    | Detected    | Detected | Compromised | Detected    |
| 6246 | A_23_P214222  | MARCKS    | Hs.519909 | myristoylated alanine-rich protein kinase C substrate               | Homo sapiens myristoylated alanine-rich protein kinase C substrate (MARCKS), mRNA [NM_002356]                               | 2.39786 | down | 2.25658 | down | 22550.87100 | 55991.14500 | 16289.39900 | 32413.22500 | Detected    | Detected | Detected    | Detected    |
| 6247 | A_32_P9382    | C13orf37  | Hs.28465  | chromosome 13 open reading frame 37                                 | Homo sapiens chromosome 13 open reading frame 37 (C13orf37), mRNA [NM_001071775]                                            | 2.39748 | down | 2.45947 | down | 2242.13300  | 5566.07200  | 1564.42300  | 3392.82540  | Detected    | Detected | Detected    | Detected    |
| 6248 | A_23_P73012   | C9orf3    | Hs.434253 | chromosome 9 open reading frame 3                                   | Homo sapiens chromosome 9 open reading frame 3 (C9orf3), mRNA [NM_032823]                                                   | 2.39680 | down | 2.19971 | down | 673.55980   | 1671.63000  | 474.07650   | 919.55945   | Detected    | Detected | Detected    | Detected    |
| 6249 | A_24_P915007  | NACC1     | Hs.531614 | nucleus accumbens associated 1, BEN and BTB (POZ) domain containing | Homo sapiens nucleus accumbens associated 1, BEN and BTB (POZ) domain containing (NACC1), mRNA [NM_052876]                  | 2.39622 | down | 2.22219 | down | 6437.30760  | 15972.20500 | 4971.10300  | 9740.92900  | Detected    | Detected | Detected    | Detected    |
| 6250 | A_33_P3292337 | KIF5B     | Hs.327736 | kinesin family member 5B                                            | Homo sapiens kinesin family member 5B (KIF5B), mRNA [NM_004521]                                                             | 2.39574 | down | 2.05328 | down | 302.04883   | 749.28845   | 271.56247   | 491.68005   | Detected    | Detected | Detected    | Detected    |
| 6251 | A_33_P3230161 | GRIA2     | Hs.32763  | glutamate receptor, ionotropic, AMPA 2                              | Homo sapiens glutamate receptor, ionotropic, AMPA 2 (GRIA2), transcript variant 1, mRNA [NM_000826]                         | 2.39549 | down | 1.43506 | down | 7.92119     | 19.64796    | 6.78169     | 8.58173     | Compromised | Detected | Compromised | Compromised |
| 6252 | A_23_P349771  | HAUS5     | Hs.7426   | HAUS augmin-like complex, subunit 5                                 | Homo sapiens HAUS augmin-like complex, subunit 5 (HAUS5), mRNA [NM_015302]                                                  | 2.39504 | down | 2.46992 | down | 19.07787    | 47.31258    | 13.87438    | 30.21779    | Detected    | Detected | Compromised | Detected    |
| 6253 | A_23_P310532  | C19orf52  | Hs.164026 | chromosome 19 open reading frame 52                                 | Homo sapiens chromosome 19 open reading frame 52 (C19orf52), mRNA [NM_138358]                                               | 2.39435 | down | 2.50040 | down | 1270.71290  | 3150.41970  | 1056.75020  | 2329.95850  | Detected    | Detected | Detected    | Detected    |
| 6254 | A_23_P140434  | MYO5C     | Hs.487036 | myosin VC                                                           | Homo sapiens myosin VC (MYO5C), mRNA [NM_018728]                                                                            | 2.39383 | down | 1.66252 | down | 14.27611    | 35.38635    | 10.46960    | 15.34837    | Detected    | Detected | Compromised | Detected    |

|      |               |           |           |                                                           |                                                                                                                                 |         |      |         |      |             |              |             |             |          |          |             |          |
|------|---------------|-----------|-----------|-----------------------------------------------------------|---------------------------------------------------------------------------------------------------------------------------------|---------|------|---------|------|-------------|--------------|-------------|-------------|----------|----------|-------------|----------|
| 6255 | A_33_P3268310 | LIMS3     | Hs.535619 | LIM and senescent cell antigen-like domains 3             | Homo sapiens LIM and senescent cell antigen-like domains 3 (LIMS3), transcript variant 1, mRNA [NM_033514]                      | 2.39213 | down | 2.61996 | down | 293.52295   | 727.04333    | 319.16278   | 737.34863   | Detected | Detected | Detected    | Detected |
| 6256 | A_32_P150735  |           |           |                                                           | B-cell receptor-associated protein 29 (BCR-associated protein Bap29) [Source:UniProtKB/Swiss-Prot;Acc:Q9UHQ4] [ENST00000379121] | 2.39200 | down | 2.52458 | down | 87.85406    | 217.59822    | 80.22090    | 178.58408   | Detected | Detected | Detected    | Detected |
| 6257 | A_23_P72961   | PRPS1     | Hs.56     | phosphoribosyl pyrophosphate synthetase 1                 | Homo sapiens phosphoribosyl pyrophosphate synthetase 1 (PRPS1), mRNA [NM_002764]                                                | 2.39010 | down | 3.88238 | down | 542.25780   | 1342.00730   | 1291.66760  | 4421.95560  | Detected | Detected | Detected    | Detected |
| 6258 | A_33_P3344243 | C4orf46   | Hs.380920 | chromosome 4 open reading frame 46                        | Homo sapiens chromosome 4 open reading frame 46 (C4orf46), mRNA [NM_001008393]                                                  | 2.39009 | down | 2.37191 | down | 2867.72140  | 7097.15900   | 2252.21660  | 4710.57000  | Detected | Detected | Detected    | Detected |
| 6259 | A_24_P198844  | MPDU1     | Hs.246381 | mannose-P-dolichol utilization defect 1                   | Homo sapiens mannose-P-dolichol utilization defect 1 (MPDU1), transcript variant 1, mRNA [NM_004870]                            | 2.38948 | down | 2.58342 | down | 1538.85110  | 3807.44500   | 1276.66130  | 2908.27700  | Detected | Detected | Detected    | Detected |
| 6260 | A_32_P224234  |           | Hs.536063 |                                                           | PREDICTED: Homo sapiens hypothetical LOC645195 (LOC645195), miscRNA [XR_040418]                                                 | 2.38917 | down | 2.50690 | down | 65.37261    | 161.72432    | 52.73568    | 116.57539   | Detected | Detected | Detected    | Detected |
| 6261 | A_23_P7873    | MCM3      | Hs.179565 | minichromosome maintenance complex component 3            | Homo sapiens minichromosome maintenance complex component 3 (MCM3), mRNA [NM_002388]                                            | 2.38910 | down | 2.31777 | down | 6732.87800  | 16655.89800  | 6376.69730  | 13032.62300 | Detected | Detected | Detected    | Detected |
| 6262 | A_23_P33196   | COL5A2    | Hs.445827 | collagen, type V, alpha 2                                 | Homo sapiens collagen, type V, alpha 2 (COL5A2), mRNA [NM_000593]                                                               | 2.38858 | down | 2.50586 | down | 9524.81800  | 23557.50400  | 6864.69040  | 15168.54300 | Detected | Detected | Detected    | Detected |
| 6263 | A_33_P3342628 | HES4      | Hs.154029 | hairy and enhancer of split 4 (Drosophila)                | Homo sapiens hairy and enhancer of split 4 (Drosophila) (HES4), transcript variant 2, mRNA [NM_021170]                          | 2.38764 | down | 2.37045 | down | 5532.15620  | 13677.19500  | 5212.37060  | 10895.11700 | Detected | Detected | Detected    | Detected |
| 6264 | A_24_P296508  | SLC43A2   | Hs.160550 | solute carrier family 43, member 2                        | Homo sapiens solute carrier family 43, member 2 (SLC43A2), mRNA [NM_152346]                                                     | 2.38760 | down | 2.51008 | down | 956.45996   | 2364.62480   | 368.64752   | 815.95087   | Detected | Detected | Detected    | Detected |
| 6265 | A_33_P3317825 | NRAS      | Hs.486502 | neuroblastoma RAS viral (v-ras) oncogene homolog          | Homo sapiens neuroblastoma RAS viral (v-ras) oncogene homolog (NRAS), mRNA [NM_002524]                                          | 2.38677 | down | 2.26301 | down | 285.97577   | 706.76135    | 350.15155   | 698.72766   | Detected | Detected | Detected    | Detected |
| 6266 | A_24_P147398  | VPS53     | Hs.461819 | vacuolar protein sorting 53 homolog (S. cerevisiae)       | Homo sapiens vacuolar protein sorting 53 homolog (S. cerevisiae) (VPS53), transcript variant 2, mRNA [NM_018289]                | 2.38562 | down | 3.57164 | down | 26.40779    | 65.23292     | 10.51792    | 33.12555    | Detected | Detected | Compromised | Detected |
| 6267 | A_24_P170753  |           | Hs.122115 |                                                           | EP400 N-terminal-like protein [Source:UniProtKB/Swiss-Prot;Acc:Q6ZTU2] [ENST0000032352]                                         | 2.38513 | down | 2.50227 | down | 458.37195   | 1132.04410   | 363.75073   | 802.60810   | Detected | Detected | Detected    | Detected |
| 6268 | A_32_P506600  | RAN       | Hs.10842  | RAN, member RAS oncogene family                           | Homo sapiens RAN, member RAS oncogene family (RAN), mRNA [NM_006325]                                                            | 2.38506 | down | 2.19907 | down | 58519.81200 | 144522.44000 | 42442.34000 | 82300.92000 | Detected | Detected | Detected    | Detected |
| 6269 | A_23_P348298  | SAC3D1    | Hs.23642  | SAC3 domain containing 1                                  | Homo sapiens SAC3 domain containing 1 (SAC3D1), mRNA [NM_013299]                                                                | 2.38460 | down | 2.38017 | down | 2461.94870  | 6078.92720   | 2271.81500  | 4768.10740  | Detected | Detected | Detected    | Detected |
| 6270 | A_23_P118150  | ARL6IP1   | Hs.634882 | ADP-ribosylation factor-like 6 interacting protein 1      | Homo sapiens ADP-ribosylation factor-like 6 interacting protein 1 (ARL6IP1), mRNA [NM_015161]                                   | 2.38448 | down | 2.32264 | down | 2155.11380  | 5321.04830   | 1496.81860  | 3065.81280  | Detected | Detected | Detected    | Detected |
| 6271 | A_23_P107412  | P4HB      | Hs.464336 | prolyl 4-hydroxylase, beta polypeptide                    | Homo sapiens prolyl 4-hydroxylase, beta polypeptide (P4HB), mRNA [NM_000918]                                                    | 2.38394 | down | 2.66079 | down | 28360.87700 | 70007.99000  | 20931.53700 | 49110.79700 | Detected | Detected | Detected    | Detected |
| 6272 | A_33_P3369029 | LOC440300 | Hs.546565 | chondroitin sulfate proteoglycan 4 pseudogene             | PREDICTED: Homo sapiens chondroitin sulfate proteoglycan 4 pseudogene (LOC440300), miscRNA [XR_078504]                          | 2.38364 | down | 2.95469 | down | 27.54297    | 67.98065     | 23.23212    | 60.52940    | Detected | Detected | Detected    | Detected |
| 6273 | A_33_P3314192 | PACSN2    | Hs.162877 | protein kinase C and casein kinase substrate in neurons 2 | Homo sapiens protein kinase C and casein kinase substrate in neurons 2 (PACSN2), mRNA [NM_007229]                               | 2.38339 | down | 2.49808 | down | 511.49560   | 1262.32150   | 642.05980   | 1414.32090  | Detected | Detected | Detected    | Detected |
| 6274 | A_24_P194420  | CCDC134   | Hs.474991 | coiled-coil domain containing 134                         | Homo sapiens coiled-coil domain containing 134 (CCDC134), mRNA [NM_024821]                                                      | 2.38299 | down | 3.98437 | down | 44.92689    | 110.85669    | 30.18556    | 106.05341   | Detected | Detected | Detected    | Detected |
| 6275 | A_23_P413788  | FUT11     | Hs.588854 | fucosyltransferase 11 (alpha (1,3) fucosyltransferase)    | Homo sapiens fucosyltransferase 11 (alpha (1,3) fucosyltransferase) (FUT11), mRNA [NM_173540]                                   | 2.38255 | down | 2.43215 | down | 179.66650   | 443.24270    | 168.40967   | 361.17910   | Detected | Detected | Detected    | Detected |
| 6276 | A_23_P43580   | CEP110    | Hs.653263 | centrosomal protein 110kDa                                | Homo sapiens centrosomal protein 110kDa (CEP110), mRNA [NM_007018]                                                              | 2.38243 | down | 1.63333 | down | 36.90078    | 91.03100     | 27.92016    | 40.21216    | Detected | Detected | Detected    | Detected |
| 6277 | A_23_P408768  | DOT1L     | Hs.713641 | DOT1-like, histone H3 methyltransferase (S. cerevisiae)   | Homo sapiens DOT1-like, histone H3 methyltransferase (S. cerevisiae) (DOT1L), mRNA [NM_032482]                                  | 2.38196 | down | 2.53330 | down | 342.23697   | 844.10190    | 336.23492   | 751.09656   | Detected | Detected | Detected    | Detected |
| 6278 | A_33_P3305855 | LOC645967 | Hs.604079 | hypothetical LOC645967                                    | PREDICTED: Homo sapiens hypothetical LOC645967 (LOC645967), miscRNA [XR_040575]                                                 | 2.38196 | down | 4.60598 | down | 26.72227    | 65.90839     | 8.49016     | 34.48285    | Detected | Detected | Compromised | Detected |
| 6279 | A_33_P3227209 | PA2G4     | Hs.524498 | proliferation-associated 2G4, 38kDa                       | Homo sapiens proliferation-associated 2G4, 38kDa (PA2G4), mRNA [NM_006191]                                                      | 2.38176 | down | 2.38053 | down | 12213.10450 | 30120.10000  | 12293.34100 | 25805.30900 | Detected | Detected | Detected    | Detected |
| 6280 | A_33_P3340792 | DHDDS     | Hs.369385 | dehydrodolichyl diphosphate synthase                      | Homo sapiens dehydrodolichyl diphosphate synthase (DHDDS), transcript variant 2, mRNA [NM_205961]                               | 2.38111 | down | 2.55784 | down | 148.87335   | 367.05432    | 158.81848   | 358.21220   | Detected | Detected | Detected    | Detected |
| 6281 | A_23_P312358  | BEND7     | Hs.498740 | BEN domain containing 7                                   | Homo sapiens BEN domain containing 7 (BEND7), transcript variant 1, mRNA [NM_152751]                                            | 2.38097 | down | 2.34528 | down | 60.32234    | 148.71849    | 47.69342    | 98.63226    | Detected | Detected | Detected    | Detected |
| 6282 | A_23_P134477  | C7orf50   | Hs.653258 | chromosome 7 open reading frame 50                        | Homo sapiens chromosome 7 open reading frame 50 (C7orf50), transcript variant 1, mRNA [NM_032350]                               | 2.38013 | down | 2.39667 | down | 1549.45960  | 3818.68200   | 2102.85200  | 4444.08300  | Detected | Detected | Detected    | Detected |

|      |               |              |           |                                                                 |                                                                                                                                                          |         |      |         |      |             |             |             |             |             |          |             |             |
|------|---------------|--------------|-----------|-----------------------------------------------------------------|----------------------------------------------------------------------------------------------------------------------------------------------------------|---------|------|---------|------|-------------|-------------|-------------|-------------|-------------|----------|-------------|-------------|
| 6283 | A_33_P3242798 | CPS1         | Hs.149252 | carbamoyl-phosphate synthetase 1, mitochondrial                 | Homo sapiens carbamoyl-phosphate synthetase 1, mitochondrial (CPS1), nuclear gene encoding mitochondrial protein, transcript variant 2, mRNA [NM_001875] | 2.37913 | down | 2.28962 | down | 124.52889   | 306.77658   | 78.26087    | 158.00630   | Detected    | Detected | Detected    | Detected    |
| 6284 | A_32_P49508   | HMGCLL1      | Hs.147054 | 3-hydroxymethyl-3-methylglutaryl-Coenzyme A lyase-like 1        | Homo sapiens 3-hydroxymethyl-3-methylglutaryl-Coenzyme A lyase-like 1 (HMGCLL1), transcript variant 1, mRNA [NM_019036]                                  | 2.37874 | down | 1.43411 | down | 9.87206     | 24.31574    | 11.87820    | 15.02095    | Compromised | Detected | Detected    | Detected    |
| 6285 | A_33_P3338341 | PRODH        | Hs.517352 | proline dehydrogenase (oxidase) 1                               | Homo sapiens proline dehydrogenase (oxidase) 1 (PRODH), nuclear gene encoding mitochondrial protein, mRNA [NM_016335]                                    | 2.37773 | down | 1.19215 | down | 15.09261    | 37.15862    | 2.52538     | 2.65475     | Detected    | Detected | Compromised | Compromised |
| 6286 | A_23_P64837   | SMAGP        | Hs.652389 | small cell adhesion glycoprotein                                | Homo sapiens small cell adhesion glycoprotein (SMAGP), transcript variant 1, mRNA [NM_001031828]                                                         | 2.37621 | down | 2.49674 | down | 937.69220   | 2307.16500  | 951.29140   | 2094.36350  | Detected    | Detected | Detected    | Detected    |
| 6287 | A_23_P359245  | MET          | Hs.132966 | met proto-oncogene (hepatocyte growth factor receptor)          | Homo sapiens met proto-oncogene (hepatocyte growth factor receptor) (MET), transcript variant 2, mRNA [NM_000245]                                        | 2.37468 | down | 2.40219 | down | 3089.59200  | 7596.94630  | 1885.15870  | 3993.20430  | Detected    | Detected | Detected    | Detected    |
| 6288 | A_33_P3232339 | LOC100129119 | Hs.154829 | hypothetical LOC100129119                                       | PREDICTED: Homo sapiens hypothetical LOC100129119 (LOC100129119), mRNA [XM_001718523]                                                                    | 2.37465 | down | 1.29436 | down | 25.62673    | 63.01248    | 15.90509    | 18.15331    | Detected    | Detected | Detected    | Detected    |
| 6289 | A_32_P194264  | CHAC2        | Hs.585944 | ChaC, cation transport regulator homolog 2 (E. coli)            | Homo sapiens ChaC, cation transport regulator homolog 2 (E. coli) (CHAC2), mRNA [NM_001008708]                                                           | 2.37441 | down | 2.92787 | down | 130.48581   | 320.81350   | 114.49580   | 295.60193   | Detected    | Detected | Detected    | Detected    |
| 6290 | A_33_P3321657 | HSPG2        | Hs.562227 | heparan sulfate proteoglycan 2                                  | Homo sapiens heparan sulfate proteoglycan 2 (HSPG2), mRNA [NM_005529]                                                                                    | 2.37340 | down | 2.34435 | down | 21245.90200 | 52212.98400 | 16998.88000 | 35140.52700 | Detected    | Detected | Detected    | Detected    |
| 6291 | A_23_P330616  | WIPF1        | Hs.128067 | WAS/WASL interacting protein family, member 1                   | Homo sapiens WAS/WASL interacting protein family, member 1 (WIPF1), transcript variant 2, mRNA [NM_001077269]                                            | 2.37257 | down | 2.57124 | down | 90.88859    | 223.28610   | 85.63651    | 194.16342   | Detected    | Detected | Detected    | Detected    |
| 6292 | A_24_P169148  | HMG1L1       | Hs.568249 | high-mobility group box 1-like 1                                | Homo sapiens high-mobility group box 1-like 1 (HMG1L1), mRNA [NM_001008735]                                                                              | 2.37077 | down | 1.98444 | down | 9072.45200  | 22271.36700 | 7471.40400  | 13073.92000 | Detected    | Detected | Detected    | Detected    |
| 6293 | A_24_P410952  | PEA15        | Hs.517216 | phosphoprotein enriched in astrocytes 15                        | Homo sapiens phosphoprotein enriched in astrocytes 15 (PEA15), mRNA [NM_003768]                                                                          | 2.36988 | down | 2.86838 | down | 1786.65490  | 4384.29540  | 2105.33900  | 5325.05960  | Detected    | Detected | Detected    | Detected    |
| 6294 | A_33_P3249354 | CDC99        | Hs.368710 | coiled-coil domain containing 99                                | Homo sapiens coiled-coil domain containing 99 (CDC99), mRNA [NM_017785]                                                                                  | 2.36716 | down | 2.41207 | down | 682.93640   | 1673.94430  | 550.39636   | 1170.66170  | Detected    | Detected | Detected    | Detected    |
| 6295 | A_33_P3218832 | RIMS1        | Hs.485729 | regulating synaptic membrane exocytosis 1                       | Homo sapiens regulating synaptic membrane exocytosis 1 (RIMS1), mRNA [NM_0145689]                                                                        | 2.36644 | down | 1.48816 | down | 21.48857    | 52.65455    | 14.00723    | 18.38090    | Detected    | Detected | Compromised | Detected    |
| 6296 | A_23_P302654  | CEP72        | Hs.591741 | centrosomal protein 72kDa                                       | Homo sapiens centrosomal protein 72kDa (CEP72), mRNA [NM_018140]                                                                                         | 2.36579 | down | 2.38356 | down | 236.12088   | 578.41974   | 233.85294   | 491.51138   | Detected    | Detected | Detected    | Detected    |
| 6297 | A_23_P169017  | DEFB103A     | Hs.283082 | defensin, beta 103A                                             | Homo sapiens defensin, beta 103A (DEFB103A), mRNA [NM_018661]                                                                                            | 2.36523 | down | 5.19144 | down | 13.66321    | 33.46262    | 3.78317     | 17.31846    | Compromised | Detected | Compromised | Compromised |
| 6298 | A_24_P193943  | PIGN         | Hs.157031 | phosphatidylinositol glycan anchor biosynthesis, class N        | Homo sapiens phosphatidylinositol glycan anchor biosynthesis, class N (PIGN), transcript variant 1, mRNA [NM_176787]                                     | 2.36324 | down | 1.47021 | down | 41.13775    | 100.66568   | 36.84714    | 47.76917    | Detected    | Detected | Detected    | Detected    |
| 6299 | A_33_P3269718 | IVD          | Hs.513646 | isovaleryl Coenzyme A dehydrogenase                             | Homo sapiens isovaleryl Coenzyme A dehydrogenase (IVD), transcript variant 2, mRNA [NM_001159508]                                                        | 2.36297 | down | 2.29750 | down | 655.92220   | 1604.88100  | 590.08170   | 1195.45640  | Detected    | Detected | Detected    | Detected    |
| 6300 | A_24_P370472  | HLA-DRB4     | Hs.696211 | major histocompatibility complex, class II, DR beta 4           | Homo sapiens major histocompatibility complex, class II, DR beta 4 (HLA-DRB4), mRNA [NM_021983]                                                          | 2.36294 | down | 3.25969 | down | 6.73416     | 16.47669    | 4.93347     | 14.18061    | Compromised | Detected | Compromised | Detected    |
| 6301 | A_33_P3308959 | LOC100132805 | Hs.610785 | hypothetical LOC100132805                                       | PREDICTED: Homo sapiens similar to predicted protein (LOC100132805), mRNA [XM_001719188]                                                                 | 2.36220 | down | 2.13646 | down | 305.69235   | 747.71310   | 269.39350   | 507.51297   | Detected    | Detected | Detected    | Detected    |
| 6302 | A_23_P134058  | C6orf114     | Hs.674313 | chromosome 6 open reading frame 114                             | Homo sapiens chromosome 6 open reading frame 114 (C6orf114), mRNA [NM_033069]                                                                            | 2.36057 | down | 2.01040 | down | 13.08679    | 31.98768    | 11.70166    | 20.74412    | Compromised | Detected | Compromised | Detected    |
| 6303 | A_33_P3310475 | SEPT11       | Hs.128199 | septin 11                                                       | Homo sapiens septin 11 (SEPT11), mRNA [NM_018243]                                                                                                        | 2.35985 | down | 2.45260 | down | 19772.34600 | 48314.36000 | 14137.60900 | 30575.15200 | Detected    | Detected | Detected    | Detected    |
| 6304 | A_24_P75072   | SMUG1        | Hs.632721 | single-strand-selective monofunctional uracil-DNA glycosylase 1 | Homo sapiens single-strand-selective monofunctional uracil-DNA glycosylase 1 (SMUG1), mRNA [NM_014311]                                                   | 2.35793 | down | 2.80624 | down | 617.95605   | 1508.76420  | 642.35100   | 1589.51060  | Detected    | Detected | Detected    | Detected    |
| 6305 | A_23_P139912  | IGFBP6       | Hs.274313 | insulin-like growth factor binding protein 6                    | Homo sapiens insulin-like growth factor binding protein 6 (IGFBP6), mRNA [NM_002178]                                                                     | 2.35792 | down | 2.57043 | down | 3753.25630  | 9163.68800  | 6446.36100  | 14611.22300 | Detected    | Detected | Detected    | Detected    |
| 6306 | A_23_P426944  | PAX9         | Hs.132576 | paired box 9                                                    | Homo sapiens paired box 9 (PAX9), mRNA [NM_006194]                                                                                                       | 2.35748 | down | 1.83196 | down | 26.66429    | 65.08959    | 25.22474    | 40.74806    | Detected    | Detected | Detected    | Detected    |
| 6307 | A_24_P367211  | SOC57        | Hs.632261 | suppressor of cytokine signaling 7                              | Homo sapiens suppressor of cytokine signaling 7 (SOC57), mRNA [NM_014598]                                                                                | 2.35677 | down | 2.34208 | down | 11.68562    | 28.51689    | 11.77062    | 24.30900    | Compromised | Detected | Compromised | Detected    |
| 6308 | A_23_P74737   | EYA3         | Hs.185774 | eyes absent homolog 3 (Drosophila)                              | Homo sapiens eyes absent homolog 3 (Drosophila) (EYA3), mRNA [NM_001990]                                                                                 | 2.35626 | down | 2.35150 | down | 89.79858    | 219.09164   | 89.88936    | 186.38850   | Detected    | Detected | Detected    | Detected    |
| 6309 | A_24_P29975   | ARPC5L       | Hs.132499 | actin related protein 2/3 complex, subunit 5-like               | Homo sapiens actin related protein 2/3 complex, subunit 5-like (ARPC5L), mRNA [NM_030978]                                                                | 2.35564 | down | 2.38880 | down | 2830.70870  | 6904.57960  | 3237.32030  | 6819.17330  | Detected    | Detected | Detected    | Detected    |
| 6310 | A_33_P3210909 | SEC13        | Hs.166924 | SEC13 homolog (S. cerevisiae)                                   | Homo sapiens SEC13 homolog (S. cerevisiae) (SEC13), transcript variant 1, mRNA [NM_183352]                                                               | 2.35326 | down | 2.32439 | down | 6396.91160  | 15587.36100 | 5520.17100  | 11314.28300 | Detected    | Detected | Detected    | Detected    |
| 6311 | A_23_P146572  | NPDC1        | Hs.719906 | neural proliferation, differentiation and control, 1            | Homo sapiens neural proliferation, differentiation and control, 1 (NPDC1), mRNA [NM_015392]                                                              | 2.35100 | down | 2.55530 | down | 4597.90040  | 11192.94500 | 4012.34550  | 9040.77050  | Detected    | Detected | Detected    | Detected    |

|      |               |            |           |                                                              |                                                                                                                                                                                                                                                                                                     |         |      |         |      |             |             |             |             |             |          |             |             |
|------|---------------|------------|-----------|--------------------------------------------------------------|-----------------------------------------------------------------------------------------------------------------------------------------------------------------------------------------------------------------------------------------------------------------------------------------------------|---------|------|---------|------|-------------|-------------|-------------|-------------|-------------|----------|-------------|-------------|
| 6312 | A_23_P161439  | C10orf116  | Hs.642660 | chromosome 10 open reading frame 116                         | Homo sapiens chromosome 10 open reading frame 116 (C10orf116), mRNA [NM_006829]                                                                                                                                                                                                                     | 2.35054 | down | 2.17923 | down | 5528.31800  | 13455.29200 | 6269.69900  | 12048.02400 | Detected    | Detected | Detected    | Detected    |
| 6313 | A_23_P138025  | GPN2       | Hs.14333  | GPN-loop GTPase 2                                            | Homo sapiens GPN-loop GTPase 2 (GPN2), mRNA [NM_018066]                                                                                                                                                                                                                                             | 2.34856 | down | 2.28674 | down | 937.90730   | 2280.83890  | 1277.48940  | 2575.95830  | Detected    | Detected | Detected    | Detected    |
| 6314 | A_33_P3401252 | HSP90B3P   | Hs.591435 | heat shock protein 90kDa beta (Grp94), member 3 (pseudogene) | Homo sapiens heat shock protein 90kDa beta (Grp94), member 3 (pseudogene) (HSP90B3P), non-coding RNA [NR_003130]                                                                                                                                                                                    | 2.34808 | down | 2.20274 | down | 4265.44970  | 10370.78600 | 4206.58000  | 8170.66500  | Detected    | Detected | Detected    | Detected    |
| 6315 | A_23_P61371   | TMEM173    | Hs.379754 | transmembrane protein 173                                    | Homo sapiens transmembrane protein 173 (TMEM173), nuclear gene encoding mitochondrial protein, mRNA [NM_198282]                                                                                                                                                                                     | 2.34631 | down | 2.47218 | down | 4192.79100  | 10186.41400 | 3677.53520  | 8016.83840  | Detected    | Detected | Detected    | Detected    |
| 6316 | A_24_P89701   | IMPDH1     | Hs.654401 | IMP (inosine monophosphate) dehydrogenase 1                  | Homo sapiens IMP (inosine monophosphate) dehydrogenase 1 (IMPDH1), transcript variant 1, mRNA [NM_000893]                                                                                                                                                                                           | 2.34516 | down | 2.34783 | down | 19609.92600 | 47619.05500 | 17659.37500 | 36560.04000 | Detected    | Detected | Detected    | Detected    |
| 6317 | A_23_P127522  | HYLS1      | Hs.585071 | hydrolethalus syndrome 1                                     | Homo sapiens hydrolethalus syndrome 1 (HYLS1), transcript variant 1, mRNA [NM_145014]                                                                                                                                                                                                               | 2.34468 | down | 2.43323 | down | 660.31696   | 1603.12940  | 676.78490   | 1452.10690  | Detected    | Detected | Detected    | Detected    |
| 6318 | A_33_P3399718 | LOC128322  |           | similar to nuclear transport factor 2                        | PREDICTED: Homo sapiens similar to nuclear transport factor 2 (LOC128322), mRNA [XM_001716411]                                                                                                                                                                                                      | 2.34435 | down | 2.30505 | down | 478.85886   | 1162.41920  | 627.62683   | 1275.69620  | Detected    | Detected | Detected    | Detected    |
| 6319 | A_33_P3375451 | NYNRIN     | Hs.288348 | NYN domain and retroviral integrase containing               | Homo sapiens NYN domain and retroviral integrase containing (NYNRIN), mRNA [NM_025081]                                                                                                                                                                                                              | 2.34319 | down | 1.31541 | down | 27.04986    | 65.63056    | 22.58610    | 26.19789    | Detected    | Detected | Detected    | Detected    |
| 6320 | A_23_P67278   | ZNF443     | Hs.720755 | zinc finger protein 443                                      | Homo sapiens zinc finger protein 443 (ZNF443), mRNA [NM_005815]                                                                                                                                                                                                                                     | 2.34133 | down | 2.93591 | down | 46.28160    | 112.20278   | 11.78185    | 30.50156    | Detected    | Detected | Compromised | Detected    |
| 6321 | A_33_P3354256 | MTSS1      | Hs.336994 | metastasis suppressor 1                                      | Homo sapiens metastasis suppressor 1 (MTSS1), mRNA [NM_014751]                                                                                                                                                                                                                                      | 2.34103 | down | 1.76063 | down | 25.01372    | 60.63431    | 21.30042    | 33.06904    | Detected    | Detected | Detected    | Detected    |
| 6322 | A_33_P3304908 |            | Hs.722218 |                                                              | he90h04.y1 Melton Normalized Human Iset: 4 N4-HIS 1 Homo sapiens cDNA clone IMAGE:5674231 5', mRNA sequence [BM069901]                                                                                                                                                                              | 2.34058 | down | 2.24438 | down | 207.98209   | 504.06088   | 89.01482    | 176.16669   | Detected    | Detected | Detected    | Detected    |
| 6323 | A_33_P3402526 | CSGALNACT2 | Hs.657569 | chondroitin sulfate N-acetylgalactosaminyltransferase 2      | Homo sapiens chondroitin sulfate N-acetylgalactosaminyltransferase 2 (CSGALNACT2), mRNA [NM_018590]                                                                                                                                                                                                 | 2.33852 | down | 1.39430 | down | 211.26974   | 511.57780   | 380.51680   | 467.83713   | Detected    | Detected | Detected    | Detected    |
| 6324 | A_33_P3413701 | ERAP1      | Hs.716426 | endoplasmic reticulum aminopeptidase 1                       | Homo sapiens endoplasmic reticulum aminopeptidase 1 (ERAP1), transcript variant 2, mRNA [NM_001040458]                                                                                                                                                                                              | 2.33746 | down | 2.11009 | down | 333.07530   | 806.15740   | 223.59775   | 416.03980   | Detected    | Detected | Detected    | Detected    |
| 6325 | A_24_P162287  | CEP250     | Hs.443876 | centrosomal protein 250kDa                                   | Homo sapiens centrosomal protein 250kDa (CEP250), mRNA [NM_007186]                                                                                                                                                                                                                                  | 2.33572 | down | 2.20390 | down | 36.43417    | 88.11762    | 29.00269    | 56.36321    | Detected    | Detected | Detected    | Detected    |
| 6326 | A_24_P20630   | LEF1       | Hs.555947 | lymphoid enhancer-binding factor 1                           | Homo sapiens lymphoid enhancer-binding factor 1 (LEF1), transcript variant 1, mRNA [NM_016269]                                                                                                                                                                                                      | 2.33350 | down | 1.92865 | down | 162.12495   | 391.73346   | 121.71104   | 206.98984   | Detected    | Detected | Detected    | Detected    |
| 6327 | A_24_P178065  |            | Hs.477114 |                                                              | Placketrin homology-like domain family B member 2 (Protein LL5-beta) [Source:UniProtKB/Swiss-Prot;Acc:Q86S00] [ENST00000478922]                                                                                                                                                                     | 2.33321 | down | 1.32988 | down | 386.86642   | 934.64746   | 17.73886    | 20.80199    | Detected    | Detected | Detected    | Detected    |
| 6328 | A_23_P26223   | ASL        | Hs.632015 | argininosuccinate lyase                                      | Homo sapiens argininosuccinate lyase (ASL), transcript variant 1, mRNA [NM_010294943]                                                                                                                                                                                                               | 2.33234 | down | 2.25137 | down | 1411.58980  | 3409.04570  | 1954.22990  | 3879.60940  | Detected    | Detected | Detected    | Detected    |
| 6329 | A_24_P233786  | FAM129A    | Hs.518662 | family with sequence similarity 129, member A                | Homo sapiens family with sequence similarity 129, member A (FAM129A), transcript variant 2, mRNA [NM_052966]                                                                                                                                                                                        | 2.33174 | down | 2.40136 | down | 1587.27000  | 3832.34500  | 1325.88490  | 2807.55620  | Detected    | Detected | Detected    | Detected    |
| 6330 | A_23_P165840  | ODC1       | Hs.467701 | ornithine decarboxylase 1                                    | Homo sapiens ornithine decarboxylase 1 (ODC1), mRNA [NM_002539]                                                                                                                                                                                                                                     | 2.33167 | down | 2.32514 | down | 13138.87200 | 31721.78000 | 10350.43200 | 21221.34000 | Detected    | Detected | Detected    | Detected    |
| 6331 | A_33_P3550894 | GATA2      | Hs.367725 | GATA binding protein 2                                       | Homo sapiens GATA binding protein 2 (GATA2), transcript variant 1, mRNA [NM_001145661]                                                                                                                                                                                                              | 2.33090 | down | 2.25758 | down | 43.18446    | 104.22799   | 41.48375    | 82.58216    | Detected    | Detected | Detected    | Detected    |
| 6332 | A_23_P431381  | C14orf80   | Hs.720306 | chromosome 14 open reading frame 80                          | Homo sapiens chromosome 14 open reading frame 80 (C14orf80), transcript variant 1, mRNA [NM_001134875]                                                                                                                                                                                              | 2.33074 | down | 2.62601 | down | 274.93780   | 663.53210   | 497.26020   | 1151.45310  | Detected    | Detected | Detected    | Detected    |
| 6333 | A_33_P3408212 | HSP90B1    | Hs.192374 | heat shock protein 90kDa beta (Grp94), member 1              | Homo sapiens heat shock protein 90kDa beta (Grp94), member 1 (HSP90B1), mRNA [NM_003299]                                                                                                                                                                                                            | 2.32980 | down | 2.22592 | down | 2519.94290  | 6079.15230  | 1664.37380  | 3266.82540  | Detected    | Detected | Detected    | Detected    |
| 6334 | A_33_P3284518 | UHRF1BP1L  | Hs.620701 | UHRF1 binding protein 1-like                                 | Homo sapiens UHRF1 binding protein 1-like (UHRF1BP1L), transcript variant 2, mRNA [NM_001006947]                                                                                                                                                                                                    | 2.32979 | down | 2.30091 | down | 149.22653   | 359.99470   | 114.90129   | 233.12581   | Detected    | Detected | Detected    | Detected    |
| 6335 | A_33_P3335360 |            |           |                                                              | Homo sapiens unknown mRNA, complete cds. [AF281279]                                                                                                                                                                                                                                                 | 2.32957 | down | 2.49382 | down | 47.29825    | 114.09156   | 36.11374    | 79.41522    | Detected    | Detected | Detected    | Detected    |
| 6336 | A_33_P3221843 |            |           |                                                              | Hexaprenyl(dihydroxybenzoate methyltransferase, mitochondrial Precursor (EC 2.1.1.114)(Dihydroxyhexaprenylbenzoate methyltransferase)(3,4-dihydroxy-5-hexaprenylbenzoate methyltransferase)(DHHB methyltransferase)(DHHB-MTase)(DHHB-MT) [Source:UniProtKB/Swiss-Prot;Acc:Q9NZJ6] [ENST00000369242] | 2.32903 | down | 2.39355 | down | 526.17090   | 1268.92250  | 317.35876   | 669.81995   | Detected    | Detected | Detected    | Detected    |
| 6337 | A_33_P3367701 | TMEM164    | Hs.659535 | transmembrane protein 164                                    | Homo sapiens transmembrane protein 164 (TMEM164), transcript variant 2, mRNA [NM_032227]                                                                                                                                                                                                            | 2.32827 | down | 3.46092 | down | 11.33496    | 27.32665    | 9.05316     | 27.62849    | Compromised | Detected | Compromised | Detected    |
| 6338 | A_33_P3400278 |            |           |                                                              |                                                                                                                                                                                                                                                                                                     | 2.32799 | down | 1.87838 | down | 13.02926    | 31.40756    | 4.36430     | 7.22875     | Detected    | Detected | Compromised | Compromised |
| 6339 | A_23_P145357  | BAK1       | Hs.485139 | BCL2-antagonist/killer 1                                     | Homo sapiens BCL2-antagonist/killer 1 (BAK1), mRNA [NM_001188]                                                                                                                                                                                                                                      | 2.32791 | down | 2.65414 | down | 1202.95950  | 2899.68100  | 1258.46310  | 2945.30710  | Detected    | Detected | Detected    | Detected    |

|      |               |              |           |                                                                             |                                                                                                                                                    |         |      |         |      |              |              |             |              |             |          |             |             |
|------|---------------|--------------|-----------|-----------------------------------------------------------------------------|----------------------------------------------------------------------------------------------------------------------------------------------------|---------|------|---------|------|--------------|--------------|-------------|--------------|-------------|----------|-------------|-------------|
| 6340 | A_32_P48244   | ZNF100       | Hs.365142 | zinc finger protein 100                                                     | Homo sapiens zinc finger protein 100, mRNA (cDNA clone MGC:45410 IMAGE:5576923), complete cds [BC035579]                                           | 2.32658 | down | 2.58641 | down | 6.75861      | 16.28205     | 2.51934     | 5.74579      | Compromised | Detected | Compromised | Compromised |
| 6341 | A_33_P3252781 | PLAC9        | Hs.204947 | placenta-specific 9                                                         | Homo sapiens placenta-specific 9 (PLAC9), mRNA [NM_001012973]                                                                                      | 2.32372 | down | 2.25151 | down | 463.61545    | 1115.51120   | 833.56440   | 1654.92460   | Detected    | Detected | Detected    | Detected    |
| 6342 | A_23_P310972  | PCDHGB1      | Hs.368160 | protocadherin gamma subfamily B, 1                                          | Homo sapiens protocadherin gamma subfamily B, 1 (PCDHGB1), transcript variant 2, mRNA [NM_032095]                                                  | 2.32229 | down | 2.76571 | down | 8.79056      | 21.13807     | 6.73388     | 16.42243     | Compromised | Detected | Compromised | Detected    |
| 6343 | A_32_P63848   | OXCT1        | Hs.278277 | 3-oxoacid CoA transferase 1                                                 | Homo sapiens 3-oxoacid CoA transferase 1 (OXCT1), nuclear gene encoding mitochondrial protein, mRNA [NM_000436]                                    | 2.32210 | down | 2.12275 | down | 1247.79800   | 3000.26000   | 803.16860   | 1503.38710   | Detected    | Detected | Detected    | Detected    |
| 6344 | A_23_P203267  | TRIM29       | Hs.504115 | tripartite motif-containing 29                                              | Homo sapiens tripartite motif-containing 29 (TRIM29), mRNA [NM_012101]                                                                             | 2.32154 | down | 2.39221 | down | 9.05919      | 21.77700     | 6.10862     | 12.88572     | Compromised | Detected | Compromised | Compromised |
| 6345 | A_33_P3216150 | PRB4         | Hs.528651 | proline-rich protein BstNI subfamily 4                                      | Homo sapiens proline-rich protein BstNI subfamily 4 (PRB4), mRNA [NM_002723]                                                                       | 2.32132 | down | 2.36551 | down | 64.38258     | 154.75209    | 65.93984    | 137.54308    | Detected    | Detected | Detected    | Detected    |
| 6346 | A_33_P3320772 | ATXN1        | Hs.434961 | ataxin 1                                                                    | Homo sapiens ataxin 1 (ATXN1), transcript variant 1, mRNA [NM_000332]                                                                              | 2.32023 | down | 2.11026 | down | 45.63403     | 109.63612    | 48.18290    | 89.65896     | Detected    | Detected | Detected    | Detected    |
| 6347 | A_24_P250765  | PRKG1        | Hs.654556 | protein kinase, cGMP-dependent, type I                                      | Homo sapiens protein kinase, cGMP-dependent, type I (PRKG1), transcript variant 2, mRNA [NM_006258]                                                | 2.32003 | down | 2.17205 | down | 33.04324     | 79.37972     | 25.01828    | 47.91743     | Detected    | Detected | Detected    | Detected    |
| 6348 | A_24_P282416  | ABL1         | Hs.431048 | c-abl oncogene 1, receptor tyrosine kinase                                  | Homo sapiens c-abl oncogene 1, receptor tyrosine kinase (ABL1), transcript variant b, mRNA [NM_007313]                                             | 2.31979 | down | 2.44460 | down | 30.29367     | 72.76679     | 34.40602    | 74.16642     | Detected    | Detected | Detected    | Detected    |
| 6349 | A_33_P3410284 |              |           |                                                                             | Dedicator of cytokinesis protein 9 (Ddc42 guanine nucleotide exchange factor zizimin-1) [Source:UniProtKB/Swiss-Prot;Acc:Q9B229] [ENST00000400224] | 2.31974 | down | 1.42064 | down | 18.74068     | 45.01495     | 13.76184    | 17.23956     | Detected    | Detected | Compromised | Detected    |
| 6350 | A_23_P28105   | TSN          | Hs.75066  | translin                                                                    | Homo sapiens translin (TSN), mRNA [NM_004622]                                                                                                      | 2.31941 | down | 2.23600 | down | 2349.64620   | 5643.04930   | 2457.87350  | 4846.15000   | Detected    | Detected | Detected    | Detected    |
| 6351 | A_33_P3330236 |              |           |                                                                             | ATP-binding cassette sub-family D member 1 (Adrenoleukodystrophy protein)(ALDP) [Source:UniProtKB/Swiss-Prot;Acc:P33897] [ENST00000370129]         | 2.31920 | down | 2.92573 | down | 86.08221     | 206.72093    | 97.49584    | 251.52731    | Detected    | Detected | Detected    | Detected    |
| 6352 | A_23_P16722   | DOCK10       | Hs.46578  | dedicator of cytokinesis 10                                                 | Homo sapiens dedicator of cytokinesis 10 (DOCK10), mRNA [NM_014689]                                                                                | 2.31785 | down | 2.38189 | down | 659.40796    | 1582.60460   | 579.55835   | 1217.28280   | Detected    | Detected | Detected    | Detected    |
| 6353 | A_33_P3294317 | LOC100128913 |           | hypothetical protein LOC100128913                                           | PREDICTED: Homo sapiens hypothetical LOC100128913 (LOC100128913), mRNA [XM_001725730]                                                              | 2.31771 | down | 2.64594 | down | 56.90114     | 136.55650    | 46.66309    | 108.87250    | Detected    | Detected | Detected    | Detected    |
| 6354 | A_32_P11173   | C6orf150     | Hs.658405 | chromosome 6 open reading frame 150                                         | Homo sapiens chromosome 6 open reading frame 150 (C6orf150), mRNA [NM_138441]                                                                      | 2.31694 | down | 2.68591 | down | 108.67078    | 260.71176    | 64.15840    | 151.95360    | Detected    | Detected | Detected    | Detected    |
| 6355 | A_23_P302470  | SULT1B1      | Hs.129742 | sulfotransferase family, cytosolic, 1B, member 1                            | Homo sapiens sulfotransferase family, cytosolic, 1B, member 1 (SULT1B1), mRNA [NM_014465]                                                          | 2.31677 | down | 2.30844 | down | 37.15598     | 89.13435     | 12.05587    | 24.54048     | Detected    | Detected | Compromised | Detected    |
| 6356 | A_23_P47565   | LDHA         | Hs.2795   | lactate dehydrogenase A                                                     | Homo sapiens lactate dehydrogenase A (LDHA), transcript variant 1, mRNA [NM_005566]                                                                | 2.31662 | down | 2.41724 | down | 76183.23400  | 182746.06000 | 70225.93000 | 149686.80000 | Detected    | Detected | Detected    | Detected    |
| 6357 | A_33_P3419594 | LOC100132338 | Hs.473827 | hypothetical protein LOC100132338                                           | Homo sapiens cDNA FLJ90181 fis, clone MAMMA1000706, [AK074662]                                                                                     | 2.31590 | down | 2.53791 | down | 1303.62940   | 3126.12740   | 753.68380   | 1686.67460   | Detected    | Detected | Detected    | Detected    |
| 6358 | A_23_P133438  | FAM105A      | Hs.155085 | family with sequence similarity 105, member A                               | Homo sapiens family with sequence similarity 105, member A (FAM105A), mRNA [NM_019018]                                                             | 2.31396 | down | 3.45310 | down | 21.21443     | 50.83005     | 17.16147    | 52.25510     | Detected    | Detected | Detected    | Detected    |
| 6359 | A_24_P140608  | HBEGF        | Hs.799    | heparin-binding EGF-like growth factor                                      | Homo sapiens heparin-binding EGF-like growth factor (HBEGF), mRNA [NM_001945]                                                                      | 2.31378 | down | 2.54991 | down | 99.59885     | 238.62132    | 81.78620    | 183.89543    | Detected    | Detected | Detected    | Detected    |
| 6360 | A_32_P233304  | LIN9         | Hs.120817 | lin-9 homolog (C. elegans)                                                  | Homo sapiens lin-9 homolog (C. elegans) (LIN9), mRNA [NM_173083]                                                                                   | 2.31374 | down | 2.23330 | down | 1239.48410   | 2969.53880   | 950.16266   | 1871.15430   | Detected    | Detected | Detected    | Detected    |
| 6361 | A_33_P3417626 | ENHO         | Hs.522085 | energy homeostasis associated                                               | Homo sapiens energy homeostasis associated (ENHO), mRNA [NM_198573]                                                                                | 2.31336 | down | 3.43628 | down | 11.88954     | 28.43218     | 9.00207     | 27.27695     | Detected    | Detected | Compromised | Detected    |
| 6362 | A_23_P376488  | TNF          | Hs.241570 | tumor necrosis factor (TNF superfamily, member 2)                           | Homo sapiens tumor necrosis factor (TNF superfamily, member 2) (TNF), mRNA [NM_000594]                                                             | 2.31164 | down | 1.54580 | down | 18.88564     | 45.20486     | 20.70218    | 28.21864     | Detected    | Detected | Detected    | Detected    |
| 6363 | A_23_P394064  | PTRF         | Hs.437191 | polymerase I and transcript release factor                                  | Homo sapiens polymerase I and transcript release factor (PTRF), mRNA [NM_012232]                                                                   | 2.31148 | down | 2.51901 | down | 118298.15000 | 283139.72000 | 97201.65000 | 215908.19000 | Detected    | Detected | Detected    | Detected    |
| 6364 | A_33_P3388331 | FARP1        | Hs.403917 | FERM, RhoGEF (ARHGEF) and pleckstrin domain protein 1 (chondrocyte-derived) | Homo sapiens FERM, RhoGEF (ARHGEF) and pleckstrin domain protein 1 (chondrocyte-derived) (FARP1), transcript variant 1, mRNA [NM_005766]           | 2.31123 | down | 2.69632 | down | 396.35690    | 948.55360    | 333.25278   | 792.33920    | Detected    | Detected | Detected    | Detected    |
| 6365 | A_23_P89327   | ZNF286A      | Hs.585799 | zinc finger protein 286A                                                    | Homo sapiens zinc finger protein 286A (ZNF286A), transcript variant 1, mRNA [NM_020652]                                                            | 2.31102 | down | 2.33160 | down | 45.34695     | 108.51379    | 27.06039    | 55.63560     | Detected    | Detected | Detected    | Detected    |
| 6366 | A_23_P72157   | MFS07        | Hs.567612 | major facilitator superfamily domain containing 7                           | Homo sapiens major facilitator superfamily domain containing 7 (MFS07), mRNA [NM_032219]                                                           | 2.31081 | down | 2.31473 | down | 1013.78070   | 2425.72400   | 1375.01260  | 2806.55400   | Detected    | Detected | Detected    | Detected    |
| 6367 | A_23_P111240  | PHACTR2      | Hs.102471 | phosphatase and actin regulator 2                                           | Homo sapiens phosphatase and actin regulator 2 (PHACTR2), transcript variant 3, mRNA [NM_014721]                                                   | 2.30959 | down | 2.34968 | down | 765.06433    | 1829.64010   | 506.04733   | 1048.49230   | Detected    | Detected | Detected    | Detected    |
| 6368 | A_24_P404245  | PCYT2        | Hs.568843 | phosphate cytidylyltransferase 2, ethanolamine                              | Homo sapiens phosphate cytidylyltransferase 2, ethanolamine (PCYT2), mRNA [NM_002861]                                                              | 2.30941 | down | 2.48629 | down | 210.20413    | 502.66104    | 234.87923   | 514.94690    | Detected    | Detected | Detected    | Detected    |

|      |               |              |           |                                                                           |                                                                                                                                                                  |         |      |         |      |             |             |             |             |             |          |             |             |
|------|---------------|--------------|-----------|---------------------------------------------------------------------------|------------------------------------------------------------------------------------------------------------------------------------------------------------------|---------|------|---------|------|-------------|-------------|-------------|-------------|-------------|----------|-------------|-------------|
| 6369 | A_23_P366394  | ZAK          | Hs.444451 | sterile alpha motif and leucine zipper containing kinase AZK              | Homo sapiens sterile alpha motif and leucine zipper containing kinase AZK (ZAK), transcript variant 1, mRNA [NM_016653]                                          | 2.30936 | down | 1.81645 | down | 334.13820   | 799.00840   | 215.54822   | 345.25020   | Detected    | Detected | Detected    | Detected    |
| 6370 | A_23_P100001  | FAM174B      | Hs.27373  | family with sequence similarity 174, member B                             | Homo sapiens family with sequence similarity 174, member B (FAM174B), mRNA [NM_207446]                                                                           | 2.30662 | down | 2.40089 | down | 48.80207    | 116.55940   | 50.76467    | 107.47318   | Detected    | Detected | Detected    | Detected    |
| 6371 | A_33_P3277437 | ERI2         | Hs.248437 | ERI1 exoribonuclease family member 2                                      | Homo sapiens ERI1 exoribonuclease family member 2 (ERI2), transcript variant 1, mRNA [NM_001142725]                                                              | 2.30659 | down | 2.48802 | down | 61.34220    | 146.50820   | 41.35730    | 90.73431    | Detected    | Detected | Detected    | Detected    |
| 6372 | A_23_P381449  | SP2          | Hs.514276 | Sp2 transcription factor                                                  | Homo sapiens Sp2 transcription factor (SP2), mRNA [NM_003110]                                                                                                    | 2.30598 | down | 2.76874 | down | 165.98477   | 396.32965   | 87.86260    | 214.51236   | Detected    | Detected | Detected    | Detected    |
| 6373 | A_33_P3302210 | LOC100129129 |           | hypothetical protein LOC100129129                                         | PREDICTED: Homo sapiens hypothetical protein LOC100129129 (LOC100129129), mRNA [XM_001715395]                                                                    | 2.30354 | down | 1.14771 | down | 525.75440   | 1254.04100  | 81.65868    | 82.64191    | Detected    | Detected | Detected    | Detected    |
| 6374 | A_33_P3284933 | IL27         | Hs.528111 | interleukin 27                                                            | Homo sapiens interleukin 27 (IL27), mRNA [NM_145659]                                                                                                             | 2.30354 | down | 2.63621 | down | 51.34401    | 122.46668   | 55.38432    | 128.74553   | Detected    | Detected | Detected    | Detected    |
| 6375 | A_23_P422732  | WDR63        | Hs.97933  | WD repeat domain 63                                                       | Homo sapiens WD repeat domain 63 (WDR63), mRNA [NM_145172]                                                                                                       | 2.30341 | down | 3.47573 | down | 34.82235    | 83.05445    | 18.24452    | 55.91696    | Detected    | Detected | Detected    | Detected    |
| 6376 | A_33_P3413114 | ADAMTSL1     | Hs.522019 | ADAMTS-like 1                                                             | Homo sapiens ADAMTS-like 1 (ADAMTSL1), transcript variant 2, mRNA [NM_052866]                                                                                    | 2.30268 | down | 2.57508 | down | 168.77023   | 402.40380   | 134.27980   | 304.90690   | Detected    | Detected | Detected    | Detected    |
| 6377 | A_23_P45099   | HLA-DRB5     | Hs.534322 | major histocompatibility complex, class II, DR beta 5                     | Homo sapiens major histocompatibility complex, class II, DR beta 5 (HLA-DRB5), mRNA [NM_002125]                                                                  | 2.30263 | down | 1.51236 | down | 8.01390     | 19.10737    | 9.50742     | 12.67899    | Compromised | Detected | Compromised | Compromised |
| 6378 | A_33_P3411925 | WDR18        | Hs.325321 | WD repeat domain 18                                                       | Homo sapiens WD repeat domain 18 (WDR18), mRNA [NM_024100]                                                                                                       | 2.30261 | down | 2.76645 | down | 8627.75200  | 20570.77000 | 5317.62000  | 12971.97700 | Detected    | Detected | Detected    | Detected    |
| 6379 | A_33_P3268892 |              | Hs.271721 |                                                                           | Putative uncharacterized protein Fragment [Source:UniProtKB/TrEMBL;Acc:Q96H13] [ENST00000391412]                                                                 | 2.30233 | down | 2.37754 | down | 253.43034   | 604.16950   | 225.38452   | 472.51657   | Detected    | Detected | Detected    | Detected    |
| 6380 | A_23_P207811  | PAIP1        | Hs.482038 | poly(A) binding protein interacting protein 1                             | Homo sapiens poly(A) binding protein interacting protein 1 (PAIP1), transcript variant 1, mRNA [NM_006451]                                                       | 2.30159 | down | 2.22990 | down | 2219.31250  | 5289.07300  | 1768.01090  | 3476.45240  | Detected    | Detected | Detected    | Detected    |
| 6381 | A_33_P3361393 | EIF1AX       | Hs.522590 | eukaryotic translation initiation factor 1A, X-linked                     | Homo sapiens eukaryotic translation initiation factor 1A, X-linked (EIF1AX), mRNA [NM_001412]                                                                    | 2.30117 | down | 1.99397 | down | 12453.69400 | 29674.33000 | 9867.63700  | 17349.90000 | Detected    | Detected | Detected    | Detected    |
| 6382 | A_32_P218355  | C6orf132     | Hs.710148 | chromosome 6 open reading frame 132                                       | Homo sapiens chromosome 6 open reading frame 132 (C6orf132), mRNA [NM_001164446]                                                                                 | 2.30083 | down | 2.18001 | down | 509.72830   | 1214.38300  | 358.12744   | 688.43220   | Detected    | Detected | Detected    | Detected    |
| 6383 | A_33_P3278211 | LOC100133190 | Hs.714477 | hypothetical protein LOC100133190                                         | Homo sapiens cDNA FLJ46161 fis, clone TEST4002195, [AK128041]                                                                                                    | 2.29826 | down | 2.69450 | down | 76.06416    | 181.01395   | 76.02976    | 180.64578   | Detected    | Detected | Detected    | Detected    |
| 6384 | A_33_P3326025 |              |           |                                                                           | KN motif and ankyrin repeat domain-containing protein 3 (Ankyrin repeat domain-containing protein 47) [Source:UniProtKB/Swiss-Prot;Acc:Q6NY19] [ENST00000381056] | 2.29797 | down | 1.49777 | down | 2930.47360  | 6972.94040  | 830.19950   | 1096.46080  | Detected    | Detected | Detected    | Detected    |
| 6385 | A_33_P3386467 | RPL23AP7     | Hs.406135 | ribosomal protein L23a pseudogene 7                                       | Homo sapiens ribosomal protein L23a pseudogene 7 (RPL23AP7), transcript variant 4, non-coding RNA [NR_024530]                                                    | 2.29746 | down | 2.24231 | down | 1648.42050  | 3921.47200  | 1426.96480  | 2821.46310  | Detected    | Detected | Detected    | Detected    |
| 6386 | A_24_P142024  | CHMP4A       | Hs.279761 | chromatin modifying protein 4A                                            | Homo sapiens chromatin modifying protein 4A (CHMP4A), mRNA [NM_014169]                                                                                           | 2.29707 | down | 2.46835 | down | 1940.37930  | 4615.24200  | 2028.78690  | 4415.78370  | Detected    | Detected | Detected    | Detected    |
| 6387 | A_33_P3222105 | EIF1AX       | Hs.522590 | eukaryotic translation initiation factor 1A, X-linked                     | Homo sapiens eukaryotic translation initiation factor 1A, X-linked (EIF1AX), mRNA [NM_001412]                                                                    | 2.29658 | down | 2.03174 | down | 20442.31600 | 48612.16800 | 13744.10000 | 24623.55500 | Detected    | Detected | Detected    | Detected    |
| 6388 | A_33_P3362891 | HNRNPA2B1    | Hs.487774 | heterogeneous nuclear ribonucleoprotein A2/B1                             | Homo sapiens heterogeneous nuclear ribonucleoprotein A2/B1 (HNRNPA2B1), transcript variant A2, mRNA [NM_002137]                                                  | 2.29656 | down | 2.56544 | down | 1017.28290  | 2419.08840  | 1197.04100  | 2707.92360  | Detected    | Detected | Detected    | Detected    |
| 6389 | A_33_P3270657 | FAM111B      | Hs.186579 | family with sequence similarity 111, member B                             | Homo sapiens family with sequence similarity 111, member B (FAM111B), transcript variant 1, mRNA [NM_198947]                                                     | 2.29519 | down | 3.24297 | down | 67.20326    | 159.71347   | 25.12072    | 71.83579    | Detected    | Detected | Detected    | Detected    |
| 6390 | A_24_P417935  | hCG_2014417  | Hs.656080 | hypothetical LOC100130776                                                 | Homo sapiens hypothetical LOC100130776 (LOC100130776), non-coding RNA [NR_027032]                                                                                | 2.29474 | down | 2.71709 | down | 361.34985   | 858.60657   | 438.65830   | 1050.98410  | Detected    | Detected | Detected    | Detected    |
| 6391 | A_33_P3416588 | RIT2         | Hs.464985 | Ras-like without CAAX 2                                                   | Homo sapiens Ras-like without CAAX 2 (RIT2), mRNA [NM_002930]                                                                                                    | 2.29401 | down | 1.66658 | down | 94.02600    | 223.34485   | 37.80473    | 55.55693    | Detected    | Detected | Detected    | Detected    |
| 6392 | A_23_P118888  | PAFAH1B1     | Hs.77318  | platelet-activating factor acetylhydrolase, isoform Ib, subunit 1 (45kDa) | Homo sapiens platelet-activating factor acetylhydrolase, isoform Ib, subunit 1 (45kDa) (PAFAH1B1), mRNA [NM_000430]                                              | 2.29396 | down | 2.31016 | down | 2956.88100  | 7023.48440  | 1849.35200  | 3767.28050  | Detected    | Detected | Detected    | Detected    |
| 6393 | A_24_P281395  | LOC642521    |           | similar to nuclear DNA-binding protein                                    | PREDICTED: Homo sapiens similar to nuclear DNA-binding protein (LOC642521), mRNA [XM_926017]                                                                     | 2.29327 | down | 1.71440 | down | 359.40550   | 853.44025   | 195.81113   | 296.01550   | Detected    | Detected | Detected    | Detected    |
| 6394 | A_33_P3284029 | CSE1L        | Hs.90073  | CSE1 chromosome segregation 1-like (yeast)                                | Homo sapiens CSE1 chromosome segregation 1-like (yeast) (CSE1L), mRNA [NM_001316]                                                                                | 2.29322 | down | 2.13444 | down | 4353.30220  | 10337.05800 | 4588.51500  | 8636.16900  | Detected    | Detected | Detected    | Detected    |
| 6395 | A_33_P3230324 | COPS8        | Hs.531713 | COP9 constitutive photomorphogenic homolog subunit 8 (Arabidopsis)        | Homo sapiens COP9 constitutive photomorphogenic homolog subunit 8 (Arabidopsis) (COPS8), transcript variant 2, mRNA [NM_198189]                                  | 2.29314 | down | 2.18658 | down | 342.11392   | 812.33435   | 285.16534   | 549.82910   | Detected    | Detected | Detected    | Detected    |
| 6396 | A_23_P161563  | RAB38        | Hs.591975 | RAB38, member RAS oncogene family                                         | Homo sapiens RAB38, member RAS oncogene family (RAB38), mRNA [NM_022337]                                                                                         | 2.29261 | down | 2.18690 | down | 56.28292    | 133.61050   | 56.52208    | 108.99661   | Detected    | Detected | Detected    | Detected    |

|      |               |              |           |                                                                                                                                                                      |         |      |         |      |             |             |             |             |             |          |             |             |
|------|---------------|--------------|-----------|----------------------------------------------------------------------------------------------------------------------------------------------------------------------|---------|------|---------|------|-------------|-------------|-------------|-------------|-------------|----------|-------------|-------------|
| 6397 | A_33_P3281710 |              |           | Uncharacterized protein ENSP00000382042 [Source:UniProtKB/Swiss-Prot;Acc:ABMWP6] [ENST00000395093]                                                                   | 2.29239 | down | 2.73204 | down | 47.08192    | 111.75710   | 26.29483    | 63.34655    | Detected    | Detected | Detected    | Detected    |
| 6398 | A_23_P386764  | DOLPP1       | Hs.21701  | dolichyl pyrophosphate phosphatase 1                                                                                                                                 | 2.29203 | down | 2.30193 | down | 1068.53370  | 2535.95170  | 742.20510   | 1506.54080  | Detected    | Detected | Detected    | Detected    |
| 6399 | A_24_P213924  | KIAA1609     | Hs.288274 | KIAA1609                                                                                                                                                             | 2.29185 | down | 2.27519 | down | 4030.08600  | 9563.85900  | 3271.76370  | 6563.93650  | Detected    | Detected | Detected    | Detected    |
| 6400 | A_23_P109488  | PIK3P1       | Hs.26670  | phosphoinositide-3-kinase interacting protein 1                                                                                                                      | 2.29148 | down | 2.46090 | down | 144.37561   | 342.56560   | 148.12619   | 321.43335   | Detected    | Detected | Detected    | Detected    |
| 6401 | A_23_P110802  | CENPH        | Hs.631967 | centromere protein H                                                                                                                                                 | 2.29139 | down | 2.22005 | down | 794.73270   | 1885.61240  | 521.67830   | 1021.24670  | Detected    | Detected | Detected    | Detected    |
| 6402 | A_33_P3351745 | PVRIG        | Hs.521075 | poliovirus receptor related immunoglobulin domain containing                                                                                                         | 2.28930 | down | 2.04126 | down | 10.06876    | 23.86777    | 8.81948     | 15.87471    | Compromised | Detected | Compromised | Detected    |
| 6403 | A_23_P148785  | SFT2D2       | Hs.645435 | SFT2 domain containing 2                                                                                                                                             | 2.28903 | down | 2.49658 | down | 166.41273   | 394.43192   | 149.66891   | 329.49066   | Detected    | Detected | Detected    | Detected    |
| 6404 | A_24_P703462  | LOC100133660 | Hs.659695 | hypothetical LOC100133660                                                                                                                                            | 2.28754 | down | 2.82345 | down | 377.30150   | 893.69720   | 102.09119   | 254.17584   | Detected    | Detected | Detected    | Detected    |
| 6405 | A_32_P192692  | KCNMA1       | Hs.144795 | potassium large conductance calcium-activated channel, subfamily M, alpha member 1                                                                                   | 2.28657 | down | 1.89051 | down | 72.80983    | 172.38803   | 65.17525    | 108.64941   | Detected    | Detected | Detected    | Detected    |
| 6406 | A_23_P165722  | EIF4E2       | Hs.292026 | eukaryotic translation initiation factor 4E family member 2                                                                                                          | 2.28640 | down | 2.32240 | down | 14896.79600 | 34794.29300 | 15347.95500 | 31430.66400 | Detected    | Detected | Detected    | Detected    |
| 6407 | A_24_P401090  |              |           |                                                                                                                                                                      | 2.28610 | down | 2.06575 | down | 661.18530   | 1565.13150  | 139.63788   | 254.35855   | Detected    | Detected | Detected    | Detected    |
| 6408 | A_33_P3374210 | MKI67        | Hs.80976  | antigen identified by monoclonal antibody Ki-67                                                                                                                      | 2.28582 | down | 6.15307 | down | 294.90674   | 698.00570   | 74.25624    | 402.89355   | Detected    | Detected | Detected    | Detected    |
| 6409 | A_32_P113566  | BTBD9        | Hs.603858 | BTB (POZ) domain containing 9                                                                                                                                        | 2.28562 | down | 1.81748 | down | 9.86783     | 23.35382    | 6.20850     | 9.95000     | Compromised | Detected | Compromised | Compromised |
| 6410 | A_23_P135474  | MRPL37       | Hs.584908 | mitochondrial ribosomal protein L37                                                                                                                                  | 2.28425 | down | 2.16921 | down | 5312.01270  | 12564.21600 | 4528.39750  | 8661.85100  | Detected    | Detected | Detected    | Detected    |
| 6411 | A_23_P54517   | TYRO3        | Hs.381282 | TYRO3 protein tyrosine kinase                                                                                                                                        | 2.28240 | down | 2.43025 | down | 683.90590   | 1616.30040  | 652.41300   | 1398.10490  | Detected    | Detected | Detected    | Detected    |
| 6412 | A_33_P3262575 | BAIAP2L1     | Hs.656063 | BAI1-associated protein 2-like 1                                                                                                                                     | 2.28235 | down | 2.26232 | down | 407.01782   | 961.89825   | 248.09094   | 494.91516   | Detected    | Detected | Detected    | Detected    |
| 6413 | A_33_P3424062 | KCNF1        | Hs.23735  | potassium voltage-gated channel, subfamily F, member 1                                                                                                               | 2.28132 | down | 2.65050 | down | 13.46779    | 31.81377    | 14.71191    | 34.38448    | Compromised | Detected | Compromised | Detected    |
| 6414 | A_33_P3261132 | CYCSP52      |           | cytochrome c, somatic pseudogene 52                                                                                                                                  | 2.28072 | down | 1.72624 | down | 102.00030   | 240.88272   | 5.73450     | 8.72894     | Detected    | Detected | Compromised | Compromised |
| 6415 | A_24_P19828   | TOE1         | Hs.525091 | target of EGFR1, member 1 (nuclear)                                                                                                                                  | 2.28055 | down | 2.38961 | down | 260.31880   | 614.72190   | 268.21097   | 565.15650   | Detected    | Detected | Detected    | Detected    |
| 6416 | A_23_P162106  | MRPL48       | Hs.503239 | mitochondrial ribosomal protein L48                                                                                                                                  | 2.28043 | down | 2.37801 | down | 2288.94970  | 5404.87100  | 1564.22240  | 3280.03340  | Detected    | Detected | Detected    | Detected    |
| 6417 | A_23_P202392  | SUV39H2      | Hs.554883 | suppressor of variegation 3-9 homolog 2 (Drosophila)                                                                                                                 | 2.28033 | down | 2.43663 | down | 688.45540   | 1625.57310  | 622.60736   | 1337.73020  | Detected    | Detected | Detected    | Detected    |
| 6418 | A_33_P3348204 | C4orf39      | Hs.178648 | chromosome 4 open reading frame 39                                                                                                                                   | 2.27934 | down | 2.80630 | down | 55.01432    | 129.84311   | 50.10057    | 123.97739   | Detected    | Detected | Detected    | Detected    |
| 6419 | A_23_P13797   | C12orf49     | Hs.592011 | chromosome 12 open reading frame 49                                                                                                                                  | 2.27850 | down | 2.41432 | down | 325.08930   | 766.98250   | 239.42350   | 509.71480   | Detected    | Detected | Detected    | Detected    |
| 6420 | A_33_P3253792 | CXorf67      | Hs.97053  | chromosome X open reading frame 67                                                                                                                                   | 2.27747 | down | 4.13521 | down | 7.47837     | 17.63572    | 2.54193     | 9.26885     | Compromised | Detected | Compromised | Compromised |
| 6421 | A_23_P17393   | CSE1L        | Hs.90073  | CSE1 chromosome segregation 1-like (yeast)                                                                                                                           | 2.27718 | down | 2.28363 | down | 9280.00400  | 21881.56000 | 8756.91900  | 17633.64300 | Detected    | Detected | Detected    | Detected    |
| 6422 | A_23_P45699   | FUBP1        | Hs.567380 | far upstream element (FUSE) binding protein 1                                                                                                                        | 2.27693 | down | 2.12618 | down | 1492.37570  | 3518.52950  | 917.64606   | 1720.44570  | Detected    | Detected | Detected    | Detected    |
| 6423 | A_24_P89080   | DCK          | Hs.709    | deoxycytidine kinase                                                                                                                                                 | 2.27366 | down | 1.92916 | down | 255.18234   | 600.77160   | 151.52339   | 257.75850   | Detected    | Detected | Detected    | Detected    |
| 6424 | A_24_P109176  | ZC3H12D      | Hs.632618 | zinc finger CCHH-type containing 12D                                                                                                                                 | 2.27351 | down | 1.43914 | down | 18.39056    | 43.29374    | 15.52489    | 19.70140    | Detected    | Detected | Detected    | Detected    |
| 6425 | A_33_P3362296 |              |           | Potassium voltage-gated channel subfamily G member 1 (Voltage-gated potassium channel subunit Kv6.1)(KH2) [Source:UniProtKB/Swiss-Prot;Acc:Q9UIX4] [ENST00000396017] | 2.27289 | down | 2.35791 | down | 38.40209    | 90.37862    | 31.04419    | 64.54649    | Detected    | Detected | Detected    | Detected    |



|      |               |           |           |                                                          |                                                                                                                                                |         |      |         |      |              |              |             |              |             |          |             |             |
|------|---------------|-----------|-----------|----------------------------------------------------------|------------------------------------------------------------------------------------------------------------------------------------------------|---------|------|---------|------|--------------|--------------|-------------|--------------|-------------|----------|-------------|-------------|
| 6426 | A_23_P211428  | SMTN      | Hs.149098 | smoothelin                                               | Homo sapiens smoothelin (SMTN), transcript variant 2, mRNA [NM_134269]                                                                         | 2.27275 | down | 2.64387 | down | 1545.50290   | 3637.10080   | 2150.85840  | 5014.38700   | Detected    | Detected | Detected    | Detected    |
| 6427 | A_23_P40295   | C20orf103 | Hs.22920  | chromosome 20 open reading frame 103                     | Homo sapiens chromosome 20 open reading frame 103 (C20orf103), mRNA [NM_0122261]                                                               | 2.27245 | down | 2.30928 | down | 10.67436     | 25.11709     | 7.72828     | 15.73708     | Compromised | Detected | Compromised | Detected    |
| 6428 | A_33_P3271105 | PABPC4    | Hs.169900 | poly(A) binding protein, cytoplasmic 4 (inducible form)  | Homo sapiens poly(A) binding protein, cytoplasmic 4 (inducible form) (PABPC4), transcript variant 3, mRNA [NM_001135654]                       | 2.27140 | down | 1.12478 | down | 16.80496     | 39.52430     | 35.25442    | 34.96610     | Detected    | Detected | Detected    | Detected    |
| 6429 | A_24_P289795  |           |           |                                                          | GB                                                                                                                                             | 2.27103 | down | 3.20147 | down | 96.39473     | 231.38152    | 51.13410    | 144.35289    | Detected    | Detected | Detected    | Detected    |
| 6430 | A_33_P3216232 | ITGB1BP1  | Hs.467662 | integrin beta 1 binding protein 1                        | Homo sapiens integrin beta 1 binding protein 1 (ITGB1BP1), transcript variant 1, mRNA [NM_004763]                                              | 2.27080 | down | 2.16979 | down | 711.00916    | 1671.80790   | 432.04144   | 826.62360    | Detected    | Detected | Detected    | Detected    |
| 6431 | A_23_P258621  | RTCD1     | Hs.484222 | RNA terminal phosphate cyclase domain 1                  | Homo sapiens RNA terminal phosphate cyclase domain 1 (RTCD1), transcript variant 2, mRNA [NM_003729]                                           | 2.27077 | down | 2.16746 | down | 5092.06250   | 11972.93500  | 3673.87350  | 7021.66000   | Detected    | Detected | Detected    | Detected    |
| 6432 | A_33_P3290602 | LOC729580 | Hs.356273 | hypothetical LOC729580                                   | PREDICTED: Homo sapiens hypothetical LOC729580 (LOC729580), mRNA [XM_001126751]                                                                | 2.27073 | down | 2.23184 | down | 5950.62700   | 13991.38500  | 4820.89550  | 9487.61100   | Detected    | Detected | Detected    | Detected    |
| 6433 | A_33_P3279353 | AZU1      | Hs.72885  | azurocidin 1                                             | Homo sapiens azurocidin 1 (AZU1), mRNA [NM_001700]                                                                                             | 2.26994 | down | 1.06089 | down | 10.55162     | 24.80081     | 14.15482    | 13.24163     | Compromised | Detected | Compromised | Compromised |
| 6434 | A_24_P220058  | MAPRE1    | Hs.472437 | microtubule-associated protein, RP/EB family, member 1   | Homo sapiens microtubule-associated protein, RP/EB family, member 1 (MAPRE1), mRNA [NM_012325]                                                 | 2.26981 | down | 2.17852 | down | 4491.42500   | 10556.19100  | 3229.02600  | 6202.94970   | Detected    | Detected | Detected    | Detected    |
| 6435 | A_23_P413760  | P2RX5     | Hs.408615 | purinergic receptor P2X, ligand-gated ion channel, 5     | Homo sapiens purinergic receptor P2X, ligand-gated ion channel, 5 (P2RX5), transcript variant 3, mRNA [NM_175081]                              | 2.26831 | down | 3.24244 | down | 48.41437     | 113.71280    | 36.71761    | 104.98121    | Detected    | Detected | Detected    | Detected    |
| 6436 | A_23_P39561   | UBE2F     | Hs.471785 | ubiquitin-conjugating enzyme E2F (putative)              | Homo sapiens ubiquitin-conjugating enzyme E2F (putative) (UBE2F), mRNA [NM_080678]                                                             | 2.26821 | down | 2.42859 | down | 1101.75010   | 2587.61470   | 898.92413   | 1925.05080   | Detected    | Detected | Detected    | Detected    |
| 6437 | A_23_P350059  | C1orf152  | Hs.632440 | profilin 1 pseudogene                                    | Homo sapiens chromosome 1 open reading frame 152 (C1orf152), non-coding RNA [NR_003242]                                                        | 2.26788 | down | 2.51673 | down | 30770.16400  | 72257.58600  | 6922.24270  | 15362.04400  | Detected    | Detected | Detected    | Detected    |
| 6438 | A_33_P3301709 | GNG4      | Hs.159711 | guanine nucleotide binding protein (G protein), gamma 4  | Homo sapiens guanine nucleotide binding protein (G protein), gamma 4 (GNG4), transcript variant 1, mRNA [NM_001098722]                         | 2.26743 | down | 2.43792 | down | 19.00255     | 44.61479     | 13.32931    | 28.65447     | Detected    | Detected | Compromised | Detected    |
| 6439 | A_32_P164246  | FOXQ1     | Hs.591352 | forkhead box Q1                                          | Homo sapiens forkhead box Q1 (FOXQ1), mRNA [NM_033280]                                                                                         | 2.26730 | down | 2.26098 | down | 2959.93200   | 6949.03120   | 2403.73460  | 4792.34700   | Detected    | Detected | Detected    | Detected    |
| 6440 | A_32_P234604  | PFN1      | Hs.494891 | profilin 1                                               | Homo sapiens profilin 1 (PFN1), mRNA [NM_005022]                                                                                               | 2.26655 | down | 2.42630 | down | 6632.23830   | 15565.35800  | 8259.27700  | 17670.64500  | Detected    | Detected | Detected    | Detected    |
| 6441 | A_23_P84118   | CDH18     | Hs.317632 | cadherin 18, type 2                                      | Homo sapiens cadherin 18, type 2 (CDH18), mRNA [NM_004934]                                                                                     | 2.26619 | down | 2.69877 | down | 13.89669     | 32.60922     | 8.69941     | 20.70241     | Detected    | Detected | Compromised | Detected    |
| 6442 | A_23_P334798  | LRRC2     | Hs.657345 | leucine rich repeat containing 2                         | Homo sapiens leucine rich repeat containing 2 (LRRC2), transcript variant 2, mRNA [NM_024750]                                                  | 2.26562 | down | 2.27514 | down | 73.28420     | 171.92190    | 52.18354    | 104.69057    | Detected    | Detected | Detected    | Detected    |
| 6443 | A_33_P3363799 | NCAM1     | Hs.503878 | neural cell adhesion molecule 1                          | Homo sapiens neural cell adhesion molecule 1 (NCAM1), transcript variant 2, mRNA [NM_181351]                                                   | 2.26438 | down | 2.29033 | down | 100.27211    | 235.10501    | 69.17639    | 139.70822    | Detected    | Detected | Detected    | Detected    |
| 6444 | A_24_P405205  | ATP2B4    | Hs.343522 | ATPase, Ca <sup>++</sup> transporting, plasma membrane 4 | Homo sapiens ATPase, Ca <sup>++</sup> transporting, plasma membrane 4 (ATP2B4), transcript variant 1, mRNA [NM_001001396]                      | 2.26392 | down | 2.27808 | down | 7633.94700   | 17895.50800  | 4279.26270  | 8596.15700   | Detected    | Detected | Detected    | Detected    |
| 6445 | A_23_P45087   | ZNF107    | Hs.50216  | zinc finger protein 107                                  | Homo sapiens zinc finger protein 107 (ZNF107), transcript variant 1, mRNA [NM_016220]                                                          | 2.26380 | down | 2.36921 | down | 124.11240    | 290.92810    | 83.24802    | 173.91727    | Detected    | Detected | Detected    | Detected    |
| 6446 | A_33_P3378772 | FAM98B    | Hs.6799   | family with sequence similarity 98, member B             | Homo sapiens family with sequence similarity 98, member B (FAM98B), transcript variant 2, mRNA [NM_001042429]                                  | 2.26362 | down | 3.15224 | down | 10.81502     | 25.34919     | 10.23436    | 28.44759     | Compromised | Detected | Compromised | Detected    |
| 6447 | A_33_P3383079 |           |           |                                                          |                                                                                                                                                | 2.26326 | down | 1.66847 | down | 16.15889     | 37.86865     | 7.75478     | 11.40914     | Detected    | Detected | Compromised | Compromised |
| 6448 | A_24_P254177  | C19orf42  | Hs.356467 | chromosome 19 open reading frame 42                      | Homo sapiens chromosome 19 open reading frame 42 (C19orf42), mRNA [NM_024104]                                                                  | 2.26155 | down | 2.25837 | down | 2217.77420   | 5193.44780   | 1798.23690  | 3581.02080   | Detected    | Detected | Detected    | Detected    |
| 6449 | A_23_P301855  | LSAMP     | Hs.657246 | limbic system-associated membrane protein                | Homo sapiens limbic system-associated membrane protein (LSAMP), mRNA [NM_022338]                                                               | 2.26141 | down | 1.88386 | down | 18.06320     | 42.29685     | 19.47525    | 32.35178     | Detected    | Detected | Detected    | Detected    |
| 6450 | A_24_P188071  | TUBA1C    | Hs.719091 | tubulin, alpha 1c                                        | Homo sapiens tubulin, alpha 1c (TUBA1C), mRNA [NM_032704]                                                                                      | 2.26118 | down | 2.60208 | down | 126222.21000 | 295531.94000 | 69343.83600 | 159108.95000 | Detected    | Detected | Detected    | Detected    |
| 6451 | A_23_P91081   | EPCAM     | Hs.542050 | epithelial cell adhesion molecule                        | Homo sapiens epithelial cell adhesion molecule (EPCAM), mRNA [NM_002354]                                                                       | 2.26071 | down | 4.31744 | down | 7.81336      | 18.29011     | 4.49730     | 17.12159     | Compromised | Detected | Compromised | Detected    |
| 6452 | A_24_P196019  |           |           |                                                          |                                                                                                                                                | 2.26012 | down | 2.22124 | down | 237.38700    | 555.54895    | 167.72264   | 328.51288    | Detected    | Detected | Detected    | Detected    |
| 6453 | A_33_P3227793 | CGREF1    | Hs.159525 | cell growth regulator with EF-hand domain 1              | Homo sapiens cell growth regulator with EF-hand domain 1 (CGREF1), transcript variant 1, mRNA [NM_006569]                                      | 2.25998 | down | 2.74908 | down | 65.74155     | 153.84291    | 65.87000    | 159.67647    | Detected    | Detected | Detected    | Detected    |
| 6454 | A_23_P64630   | RNF26     | Hs.524084 | ring finger protein 26                                   | Homo sapiens ring finger protein 26 (RNF26), mRNA [NM_032015]                                                                                  | 2.25984 | down | 2.31892 | down | 4371.03600   | 10228.08600  | 4151.04100  | 8488.04800   | Detected    | Detected | Detected    | Detected    |
| 6455 | A_24_P879740  | MAP1B     | Hs.335079 | microtubule-associated protein 1B                        | Homo sapiens microtubule-associated protein 1B (MAP1B), mRNA [NM_005909]                                                                       | 2.25947 | down | 2.24691 | down | 1230.08940   | 2877.90600   | 827.96014   | 1640.44180   | Detected    | Detected | Detected    | Detected    |
| 6456 | A_23_P48977   | MRPS11    | Hs.111286 | mitochondrial ribosomal protein S11                      | Homo sapiens mitochondrial ribosomal protein S11 (MRPS11), nuclear gene encoding mitochondrial protein, transcript variant 1, mRNA [NM_022839] | 2.25856 | down | 2.29320 | down | 2840.63200   | 6643.24270   | 3574.40360  | 7227.88040   | Detected    | Detected | Detected    | Detected    |
| 6457 | A_23_P303238  | VN1R5     | Hs.553686 | vomer nasal 1 receptor 5 (gene/pseudogene)               | Homo sapiens vomeronasal 1 receptor 5 (gene/pseudogene) (VN1R5), mRNA [NM_173858]                                                              | 2.25816 | down | 1.18559 | down | 13.41614     | 31.37005     | 19.72023    | 20.61628     | Compromised | Detected | Detected    | Detected    |

|      |               |              |           |                                                                                        |                                                                                                                                                                                       |         |      |         |      |              |              |             |              |             |          |             |          |
|------|---------------|--------------|-----------|----------------------------------------------------------------------------------------|---------------------------------------------------------------------------------------------------------------------------------------------------------------------------------------|---------|------|---------|------|--------------|--------------|-------------|--------------|-------------|----------|-------------|----------|
| 6458 | A_33_P3376636 | OPA3         | Hs.719374 | optic atrophy 3 (autosomal recessive, with chorea and spastic paraplegia)              | Homo sapiens optic atrophy 3 (autosomal recessive, with chorea and spastic paraplegia) (OPA3), nuclear gene encoding mitochondrial protein, transcript variant 1, mRNA [NM_001617989] | 2.25800 | down | 2.31795 | down | 355.12152    | 830.29610    | 262.60452   | 536.75040    | Detected    | Detected | Detected    | Detected |
| 6459 | A_33_P3226377 | PRH2         | Hs.631731 | proline-rich protein HaellI subfamily 2                                                | Homo sapiens proline-rich protein HaellI subfamily 2 (PRH2), transcript variant 1, mRNA [NM_005042]                                                                                   | 2.25749 | down | 2.55803 | down | 199.22035    | 465.68533    | 168.46227   | 379.99124    | Detected    | Detected | Detected    | Detected |
| 6460 | A_23_P136347  | EPS8         | Hs.591160 | epidermal growth factor receptor pathway substrate 8                                   | Homo sapiens epidermal growth factor receptor pathway substrate 8 (EPS8), mRNA [NM_004447]                                                                                            | 2.25728 | down | 1.89179 | down | 4739.51460   | 11077.75600  | 2184.29320  | 3643.75950   | Detected    | Detected | Detected    | Detected |
| 6461 | A_23_P83328   | ENG          | Hs.76753  | endoglin                                                                               | Homo sapiens endoglin (ENG), transcript variant 2, mRNA [NM_000118]                                                                                                                   | 2.25720 | down | 2.78881 | down | 1537.30470   | 3593.05200   | 1367.05350  | 3361.78030   | Detected    | Detected | Detected    | Detected |
| 6462 | A_33_P3341509 |              |           |                                                                                        |                                                                                                                                                                                       | 2.25715 | down | 2.21252 | down | 937.45233    | 2191.00170   | 739.65920   | 1443.05890   | Detected    | Detected | Detected    | Detected |
| 6463 | A_33_P3342957 | STK17B       | Hs.88297  | serine/threonine kinase 17b                                                            | Homo sapiens serine/threonine kinase 17b (STK17B), mRNA [NM_004226]                                                                                                                   | 2.25707 | down | 2.09234 | down | 604.75690    | 1413.37980   | 547.88440   | 1010.85110   | Detected    | Detected | Detected    | Detected |
| 6464 | A_32_P92505   | LCLAT1       | Hs.468048 | lysocardiolipin acyltransferase 1                                                      | Homo sapiens lysocardiolipin acyltransferase 1 (LCLAT1), transcript variant 1, mRNA [NM_182551]                                                                                       | 2.25686 | down | 2.08403 | down | 2532.06030   | 5917.14840   | 1518.65830  | 2790.79930   | Detected    | Detected | Detected    | Detected |
| 6465 | A_33_P3252196 | EZH2         | Hs.444082 | enhancer of zeste homolog 2 (Drosophila)                                               | Homo sapiens enhancer of zeste homolog 2 (Drosophila) (EZH2), transcript variant 1, mRNA [NM_004456]                                                                                  | 2.25620 | down | 2.28927 | down | 1197.51430   | 2797.64090   | 813.46760   | 1642.11160   | Detected    | Detected | Detected    | Detected |
| 6466 | A_33_P3275255 | LOC100132966 | Hs.632517 | hypothetical LOC100132966                                                              | PREDICTED: Homo sapiens hypothetical LOC100132966 (LOC100132966), miscRNA [XR_078228]                                                                                                 | 2.25615 | down | 1.48618 | down | 26.58828     | 62.11427     | 24.91000    | 32.64459     | Detected    | Detected | Detected    | Detected |
| 6467 | A_23_P75630   | APOA5        | Hs.283923 | apolipoprotein A-V                                                                     | Homo sapiens apolipoprotein A-V (APOA5), transcript variant 1, mRNA [NM_052968]                                                                                                       | 2.25600 | down | 1.87703 | down | 8.07216      | 18.85652     | 11.73876    | 19.42939     | Compromised | Detected | Compromised | Detected |
| 6468 | A_33_P3383331 | SLC35A3      | Hs.448979 | solute carrier family 35 (UDP-N-acetylglucosamine (UDP-GlcNAc) transporter), member A3 | Homo sapiens solute carrier family 35 (UDP-N-acetylglucosamine (UDP-GlcNAc) transporter), member A3 (SLC35A3), mRNA [NM_012243]                                                       | 2.25474 | down | 2.03941 | down | 199.55191    | 465.89316    | 76.82158    | 138.15091    | Detected    | Detected | Detected    | Detected |
| 6469 | A_24_P934800  | ERI2         | Hs.248437 | ERI1 exoribonuclease family member 2                                                   | Homo sapiens ERI1 exoribonuclease family member 2 (ERI2), transcript variant 1, mRNA [NM_001142725]                                                                                   | 2.25466 | down | 2.23201 | down | 275.09033    | 642.22955    | 255.73276   | 503.32370    | Detected    | Detected | Detected    | Detected |
| 6470 | A_33_P3393088 | LOC100131320 |           | hypothetical protein LOC100131320                                                      | PREDICTED: Homo sapiens hypothetical protein LOC100131320, transcript variant 1 (LOC100131320), mRNA [XM_001722766]                                                                   | 2.25412 | down | 2.48142 | down | 86.52884     | 201.96225    | 13.60549    | 29.77011     | Detected    | Detected | Detected    | Detected |
| 6471 | A_23_P8380    | C7orf49      | Hs.720115 | chromosome 7 open reading frame 49                                                     | Homo sapiens chromosome 7 open reading frame 49 (C7orf49), transcript variant 1, mRNA [NM_024033]                                                                                     | 2.25337 | down | 2.33507 | down | 1755.15520   | 4095.25830   | 1249.94100  | 2573.68100   | Detected    | Detected | Detected    | Detected |
| 6472 | A_23_P397308  | KLC4         | Hs.655123 | kinesin light chain 4                                                                  | Homo sapiens kinesin light chain 4 (KLC4), transcript variant 4, mRNA [NM_138343]                                                                                                     | 2.25290 | down | 1.21801 | down | 18.31725     | 42.73013     | 25.00060    | 26.85144     | Detected    | Detected | Detected    | Detected |
| 6473 | A_23_P253221  | ARHGEF4      | Hs.468935 | Rho guanine nucleotide exchange factor (GEF) 4                                         | Homo sapiens Rho guanine nucleotide exchange factor (GEF) 4 (ARHGEF4), transcript variant 2, mRNA [NM_032995]                                                                         | 2.25222 | down | 2.66899 | down | 269.74258    | 629.06146    | 230.65292   | 542.83954    | Detected    | Detected | Detected    | Detected |
| 6474 | A_23_P315571  | RFTN1        | Hs.98910  | raftlin, lipid raft linker 1                                                           | Homo sapiens raftlin, lipid raft linker 1 (RFTN1), mRNA [NM_015150]                                                                                                                   | 2.25101 | down | 2.24332 | down | 6515.51460   | 15186.57200  | 3921.42260  | 7757.10100   | Detected    | Detected | Detected    | Detected |
| 6475 | A_24_P189533  | ENDOD1       | Hs.167115 | endonuclease domain containing 1                                                       | Homo sapiens endonuclease domain containing 1 (ENDOD1), mRNA [NM_015036]                                                                                                              | 2.25051 | down | 2.58334 | down | 1167.45150   | 2720.52420   | 964.05237   | 2196.07540   | Detected    | Detected | Detected    | Detected |
| 6476 | A_33_P3381870 | EPB49        | Hs.106124 | erythrocyte membrane protein band 4.9 (dematin)                                        | Homo sapiens erythrocyte membrane protein band 4.9 (dematin) (EPB49), transcript variant 1, mRNA [NM_001978]                                                                          | 2.25008 | down | 2.92808 | down | 52.08872     | 121.35983    | 27.72312    | 71.57974     | Detected    | Detected | Detected    | Detected |
| 6477 | A_23_P146644  | ANXA2        | Hs.511605 | annexin A2                                                                             | Homo sapiens annexin A2 (ANXA2), transcript variant 2, mRNA [NM_001002857]                                                                                                            | 2.24951 | down | 2.12040 | down | 101888.86000 | 237327.17000 | 87421.41000 | 163456.17000 | Detected    | Detected | Detected    | Detected |
| 6478 | A_33_P3286208 | PPIL5        | Hs.451090 | peptidylprolyl isomerase (cyclophilin)-like 5                                          | Homo sapiens peptidylprolyl isomerase (cyclophilin)-like 5 (PPIL5), transcript variant 3, mRNA [NM_203467]                                                                            | 2.24882 | down | 2.32711 | down | 191.65773    | 446.28595    | 263.79022   | 541.30340    | Detected    | Detected | Detected    | Detected |
| 6479 | A_23_P384698  | LOC100293611 | Hs.666816 | hypothetical protein LOC100293611                                                      | PREDICTED: Homo sapiens hypothetical protein LOC100293611 (LOC100293611), mRNA [XM_002345631]                                                                                         | 2.24855 | down | 2.30359 | down | 101.52199    | 236.37146    | 69.98246    | 142.15442    | Detected    | Detected | Detected    | Detected |
| 6480 | A_23_P27795   | SPINT2       | Hs.31439  | serine peptidase inhibitor, Kunitz type, 2                                             | Homo sapiens serine peptidase inhibitor, Kunitz type, 2 (SPINT2), transcript variant a, mRNA [NM_021102]                                                                              | 2.24731 | down | 3.06525 | down | 71.83084     | 167.15036    | 48.00599    | 129.75601    | Detected    | Detected | Detected    | Detected |
| 6481 | A_23_P159688  | TBC1D25      | Hs.694353 | TBC1 domain family, member 25                                                          | Homo sapiens TBC1 domain family, member 25 (TBC1D25), mRNA [NM_002536]                                                                                                                | 2.24688 | down | 2.13982 | down | 104.35929    | 242.79765    | 94.87559    | 179.01816    | Detected    | Detected | Detected    | Detected |
| 6482 | A_33_P3220643 | PTRH1        | Hs.653265 | peptidyl-tRNA hydrolase 1 homolog (S. cerevisiae)                                      | Homo sapiens peptidyl-tRNA hydrolase 1 homolog (S. cerevisiae) (PTRH1), mRNA [NM_001002913]                                                                                           | 2.24683 | down | 2.27719 | down | 2811.25370   | 6540.39200   | 2979.14330  | 5982.14380   | Detected    | Detected | Detected    | Detected |
| 6483 | A_33_P3424367 | TRIM14       | Hs.575631 | tripartite motif-containing 14                                                         | Homo sapiens tripartite motif-containing 14 (TRIM14), transcript variant 2, mRNA [NM_033219]                                                                                          | 2.24644 | down | 1.33874 | down | 19.72015     | 45.87109     | 23.29956    | 27.50487     | Detected    | Detected | Detected    | Detected |
| 6484 | A_23_P432360  | PMM2         | Hs.713724 | phosphomannomutase 2                                                                   | Homo sapiens phosphomannomutase 2 (PMM2), mRNA [NM_000303]                                                                                                                            | 2.24598 | down | 1.86591 | down | 2056.67040   | 4783.04600   | 1989.41940  | 3273.26700   | Detected    | Detected | Detected    | Detected |
| 6485 | A_23_P206532  | PHKB         | Hs.78060  | phosphorylase kinase, beta                                                             | Homo sapiens phosphorylase kinase, beta (PHKB), transcript variant 2, mRNA [NM_001031835]                                                                                             | 2.24550 | down | 2.31546 | down | 1954.04770   | 4543.39840   | 1644.12210  | 3356.88820   | Detected    | Detected | Detected    | Detected |
| 6486 | A_33_P3258472 | SPTBN1       | Hs.503178 | spectrin, beta, non-erythrocytic 1                                                     | Homo sapiens spectrin, beta, non-erythrocytic 1 (SPTBN1), transcript variant 1, mRNA [NM_003128]                                                                                      | 2.24536 | down | 2.66961 | down | 18.54857     | 43.12497     | 10.72287    | 25.24206     | Detected    | Detected | Compromised | Detected |

|      |               |              |           |                                                                                                        |         |      |         |      |             |             |             |             |             |          |             |             |
|------|---------------|--------------|-----------|--------------------------------------------------------------------------------------------------------|---------|------|---------|------|-------------|-------------|-------------|-------------|-------------|----------|-------------|-------------|
| 6487 | A_23_P255503  | PAFAH1B2     | Hs.597488 | platelet-activating factor acetylhydrolase, isoform 1b, subunit 2 (30kDa) (PAFAH1B2), mRNA [NM_002572] | 2.24491 | down | 2.04381 | down | 422.96663   | 983.23850   | 341.62580   | 615.68207   | Detected    | Detected | Detected    | Detected    |
| 6488 | A_23_P259594  | AKAP7        | Hs.486483 | A kinase (PRKA) anchor protein 7                                                                       | 2.24474 | down | 2.28223 | down | 487.01650   | 1131.99010  | 562.43810   | 1131.87560  | Detected    | Detected | Detected    | Detected    |
| 6489 | A_33_P3257030 | SC65         | Hs.446459 | synaptonemal complex protein SC65                                                                      | 2.24359 | down | 2.22522 | down | 4911.16460  | 11409.35100 | 6592.49270  | 12935.64500 | Detected    | Detected | Detected    | Detected    |
| 6490 | A_33_P3264846 | SAMD9L       | Hs.489118 | sterile alpha motif domain containing 9-like                                                           | 2.24212 | down | 2.42834 | down | 49.94878    | 115.96233   | 31.94494    | 68.40323    | Detected    | Detected | Detected    | Detected    |
| 6491 | A_23_P47077   | BAG3         | Hs.523309 | BCL2-associated athanogene 3                                                                           | 2.24187 | down | 2.32424 | down | 1576.09840  | 3658.70460  | 1042.70170  | 2137.00930  | Detected    | Detected | Detected    | Detected    |
| 6492 | A_33_P3771165 | FLJ31715     | Hs.596176 | hypothetical protein FLJ31715                                                                          | 2.24153 | down | 2.43462 | down | 231.31354   | 536.88275   | 200.74603   | 430.96692   | Detected    | Detected | Detected    | Detected    |
| 6493 | A_23_P122052  | GPX8         | Hs.289044 | glutathione peroxidase 8 (putative)                                                                    | 2.24140 | down | 2.21135 | down | 2764.64300  | 6416.41400  | 2030.27200  | 3958.92100  | Detected    | Detected | Detected    | Detected    |
| 6494 | A_24_P196499  |              |           | Homo sapiens mRNA for RBP1-like protein, complete cds. [AB030181]                                      | 2.24096 | down | 3.32788 | down | 8.55729     | 19.85654    | 3.14798     | 9.23774     | Compromised | Detected | Compromised | Compromised |
| 6495 | A_33_P3888629 | MECOM        | Hs.721616 | MDS1 and EVI1 complex locus                                                                            | 2.23780 | down | 2.03295 | down | 251.04268   | 581.70310   | 163.39192   | 292.90292   | Detected    | Detected | Detected    | Detected    |
| 6496 | A_23_P83714   | ZNF707       | Hs.521922 | zinc finger protein 707                                                                                | 2.23768 | down | 2.27923 | down | 683.53577   | 1583.77150  | 542.51166   | 1090.34030  | Detected    | Detected | Detected    | Detected    |
| 6497 | A_24_P391853  | LOC100131482 |           | similar to hCG1643669                                                                                  | 2.23766 | down | 2.16465 | down | 3798.16430  | 8800.37700  | 4768.40700  | 9101.77200  | Detected    | Detected | Detected    | Detected    |
| 6498 | A_23_P46936   | EGR2         | Hs.1395   | early growth response 2                                                                                | 2.23670 | down | 2.41635 | down | 286.86203   | 664.37650   | 210.38345   | 448.26780   | Detected    | Detected | Detected    | Detected    |
| 6499 | A_23_P46606   | LPGAT1       | Hs.497674 | lysophosphatidylglycerol acyltransferase 1                                                             | 2.23626 | down | 1.66082 | down | 416.38260   | 964.15940   | 588.63600   | 862.05580   | Detected    | Detected | Detected    | Detected    |
| 6500 | A_23_P136978  | SRPX2        | Hs.306339 | sushi-repeat-containing protein, X-linked 2                                                            | 2.23616 | down | 2.26930 | down | 2682.15940  | 6210.41650  | 3072.39670  | 6148.01560  | Detected    | Detected | Detected    | Detected    |
| 6501 | A_23_P251548  | TEX261       | Hs.516087 | testis expressed 261                                                                                   | 2.23606 | down | 2.19471 | down | 591.02800   | 1368.43580  | 458.26500   | 886.86870   | Detected    | Detected | Detected    | Detected    |
| 6502 | A_24_P384569  | EWSR1        | Hs.374477 | Ewing sarcoma breakpoint region 1                                                                      | 2.23598 | down | 1.98778 | down | 51.32769    | 118.83717   | 49.81579    | 87.31752    | Detected    | Detected | Detected    | Detected    |
| 6503 | A_33_P3308833 | C21orf58     | Hs.236572 | chromosome 21 open reading frame 58                                                                    | 2.23594 | down | 3.11743 | down | 35.19029    | 81.47326    | 26.96487    | 74.12437    | Detected    | Detected | Detected    | Detected    |
| 6504 | A_33_P3367106 | C1orf152     | Hs.632440 | profilin 1 pseudogene                                                                                  | 2.23542 | down | 2.51078 | down | 5463.38300  | 12646.03200 | 7038.53860  | 15583.18900 | Detected    | Detected | Detected    | Detected    |
| 6505 | A_24_P925040  | CAV2         | Hs.212332 | caveolin 2                                                                                             | 2.23538 | down | 2.05087 | down | 837.27875   | 1938.00010  | 452.67847   | 818.64246   | Detected    | Detected | Detected    | Detected    |
| 6506 | A_33_P3291776 | NANS         | Hs.522310 | N-acetylneuraminic acid synthase                                                                       | 2.23302 | down | 2.09147 | down | 12292.18700 | 28422.00400 | 11515.60450 | 21237.50600 | Detected    | Detected | Detected    | Detected    |
| 6507 | A_23_P13740   | NAV3         | Hs.655301 | neuron navigator 3                                                                                     | 2.23250 | down | 2.38614 | down | 1286.13290  | 2973.10570  | 1098.14370  | 2310.58080  | Detected    | Detected | Detected    | Detected    |
| 6508 | A_33_P3504002 | LOC286186    | Hs.449427 | hypothetical protein LOC286186                                                                         | 2.23248 | down | 1.25769 | down | 33.16493    | 76.66545    | 11.99236    | 13.29981    | Detected    | Detected | Compromised | Compromised |
| 6509 | A_23_P334955  | FAM167A      | Hs.124299 | family with sequence similarity 167, member A                                                          | 2.23222 | down | 2.08637 | down | 803.27210   | 1856.65980  | 694.06670   | 1276.90340  | Detected    | Detected | Detected    | Detected    |
| 6510 | A_23_P131020  | GATAD2A      | Hs.118964 | GATA zinc finger domain containing 2A                                                                  | 2.23131 | down | 2.33701 | down | 1768.20500  | 4085.41900  | 1520.00820  | 3132.35570  | Detected    | Detected | Detected    | Detected    |
| 6511 | A_24_P307572  | ANKRD13A     | Hs.528703 | ankyrin repeat domain 13A                                                                              | 2.23042 | down | 2.03624 | down | 340.39297   | 786.14230   | 266.14426   | 477.87100   | Detected    | Detected | Detected    | Detected    |
| 6512 | A_33_P3255404 | CLDN11       | Hs.31595  | claudin 11                                                                                             | 2.22907 | down | 2.12657 | down | 9547.06300  | 22035.67000 | 6177.75500  | 11584.47200 | Detected    | Detected | Detected    | Detected    |
| 6513 | A_23_P144005  | C3orf32      | Hs.561182 | chromosome 3 open reading frame 32                                                                     | 2.22840 | down | 2.42694 | down | 24.69904    | 56.99094    | 20.78343    | 44.47759    | Detected    | Detected | Detected    | Detected    |
| 6514 | A_23_P5654    | IL1F7        | Hs.166371 | interleukin 1 family, member 7 (zeta)                                                                  | 2.22813 | down | 2.49745 | down | 138.51160   | 319.56580   | 48.38983    | 106.56529   | Detected    | Detected | Detected    | Detected    |
| 6515 | A_33_P3235831 |              |           |                                                                                                        | 2.22808 | down | 2.48713 | down | 1452.02920  | 3349.95870  | 177.98969   | 390.35464   | Detected    | Detected | Detected    | Detected    |
| 6516 | A_23_P56604   | IL1RL2       | Hs.659863 | interleukin 1 receptor-like 2                                                                          | 2.22728 | down | 1.35225 | down | 12.67857    | 29.24002    | 15.74598    | 18.77548    | Detected    | Detected | Detected    | Detected    |
| 6517 | A_33_P3316800 | AHR          | Hs.171189 | aryl hydrocarbon receptor                                                                              | 2.22609 | down | 2.17197 | down | 95.68552    | 220.55725   | 110.14152   | 210.94585   | Detected    | Detected | Detected    | Detected    |
| 6518 | A_23_P19712   | GMNN         | Hs.234896 | geminin, DNA replication inhibitor                                                                     | 2.22581 | down | 2.21651 | down | 4159.04200  | 9585.48000  | 3683.24020  | 7198.88430  | Detected    | Detected | Detected    | Detected    |
| 6519 | A_23_P34460   | SLC35A3      | Hs.448979 | solute carrier family 35 (UDP-N-acetylglucosamine (UDP-GlcNAc) transporter), member A3                 | 2.22485 | down | 2.25956 | down | 74.83668    | 172.40462   | 74.54286    | 148.52382   | Detected    | Detected | Detected    | Detected    |

|      |               |           |           |                                                                                          |                                                                                                                                                       |         |      |         |      |            |             |            |             |             |          |             |             |
|------|---------------|-----------|-----------|------------------------------------------------------------------------------------------|-------------------------------------------------------------------------------------------------------------------------------------------------------|---------|------|---------|------|------------|-------------|------------|-------------|-------------|----------|-------------|-------------|
| 6520 | A_33_P3396553 | LOC732419 |           | similar to AAA-ATPase TOB3                                                               | PREDICTED: Homo sapiens similar to belphegor (LOC732419), mRNA [XM_001718638]                                                                         | 2.22448 | down | 2.63361 | down | 807.77313  | 1860.59510  | 286.89597  | 666.25714   | Detected    | Detected | Detected    | Detected    |
| 6521 | A_23_P129856  | HIC1      | Hs.72956  | hypermethylated in cancer 1                                                              | Homo sapiens hypermethylated in cancer 1 (HIC1), transcript variant 1, mRNA [NM_006497]                                                               | 2.22410 | down | 2.43971 | down | 435.30234  | 1002.48780  | 432.44202  | 930.31910   | Detected    | Detected | Detected    | Detected    |
| 6522 | A_33_P3242659 | KIF13A    | Hs.189915 | kinesin family member 13A                                                                | Homo sapiens kinesin family member 13A (KIF13A), transcript variant 1, mRNA [NM_022113]                                                               | 2.22391 | down | 2.21564 | down | 204.78369  | 471.56890   | 226.06859  | 441.67792   | Detected    | Detected | Detected    | Detected    |
| 6523 | A_33_P3369158 | KIF3C     | Hs.21611  | kinesin family member 3C                                                                 | Homo sapiens kinesin family member 3C (KIF3C), mRNA [NM_002254]                                                                                       | 2.22327 | down | 2.53916 | down | 120.94866  | 278.43665   | 115.49973  | 258.60486   | Detected    | Detected | Detected    | Detected    |
| 6524 | A_24_P143574  | SIRPB1    | Hs.709487 | signal-regulatory protein beta 1                                                         | Homo sapiens signal-regulatory protein beta 1 (SIRPB1), transcript variant 1, mRNA [NM_006065]                                                        | 2.22302 | down | 2.94987 | down | 27.46608   | 63.22277    | 24.31192   | 63.23936    | Detected    | Detected | Detected    | Detected    |
| 6525 | A_23_P250358  | HERC6     | Hs.529317 | hect domain and RLD 6                                                                    | Homo sapiens hect domain and RLD 6 (HERC6), transcript variant 1, mRNA [NM_017912]                                                                    | 2.22218 | down | 2.19011 | down | 14.22496   | 32.73130    | 3.54793    | 6.85185     | Detected    | Detected | Compromised | Compromised |
| 6526 | A_33_P3215392 | EXOC3L2   | Hs.721742 | exocyst complex component 3-like 2                                                       | Homo sapiens exocyst complex component 3-like 2 (EXOC3L2), mRNA [NM_138568]                                                                           | 2.22138 | down | 1.20727 | down | 7.95078    | 18.28802    | 8.84290    | 9.41375     | Compromised | Detected | Compromised | Compromised |
| 6527 | A_23_P94703   | TOR1B     | Hs.252682 | torsin family 1, member B (torsin B)                                                     | Homo sapiens torsin family 1, member B (torsin B) (TOR1B), mRNA [NM_014506]                                                                           | 2.22039 | down | 1.98729 | down | 811.58344  | 1865.92830  | 862.59845  | 1511.59340  | Detected    | Detected | Detected    | Detected    |
| 6528 | A_33_P3329597 | BLOC1S3   | Hs.103902 | biogenesis of lysosomal organelles complex-1, subunit 3                                  | Homo sapiens biogenesis of lysosomal organelles complex-1, subunit 3 (BLOC1S3), mRNA [NM_212590]                                                      | 2.22013 | down | 2.23607 | down | 2238.12600 | 5145.13400  | 1697.34940 | 3346.74490  | Detected    | Detected | Detected    | Detected    |
| 6529 | A_33_P3615955 |           |           |                                                                                          |                                                                                                                                                       | 2.21997 | down | 1.31640 | down | 99.63741   | 229.03528   | 52.90581   | 61.41233    | Detected    | Detected | Detected    | Detected    |
| 6530 | A_23_P254797  | BPIL1     | Hs.257045 | bactericidal/permeability-increasing protein-like 1                                      | Homo sapiens bactericidal/permeability-increasing protein-like 1 (BPIL1), mRNA [NM_025227]                                                            | 2.21944 | down | 2.04648 | down | 488.12620  | 1121.78270  | 89.05166   | 160.70000   | Detected    | Detected | Detected    | Detected    |
| 6531 | A_33_P3712341 | CXCL12    | Hs.522891 | chemokine (C-X-C motif) ligand 12 (stromal cell-derived factor 1)                        | Homo sapiens chemokine (C-X-C motif) ligand 12 (stromal cell-derived factor 1) (CXCL12), transcript variant 3, mRNA [NM_001033886]                    | 2.21944 | down | 2.35518 | down | 372.28757  | 855.56920   | 208.04623  | 432.06543   | Detected    | Detected | Detected    | Detected    |
| 6532 | A_23_P416468  | PIF1      | Hs.112160 | PIF1 5'-to-3' DNA helicase homolog (S. cerevisiae)                                       | Homo sapiens PIF1 5'-to-3' DNA helicase homolog (S. cerevisiae) (PIF1), mRNA [NM_025049]                                                              | 2.21903 | down | 2.14748 | down | 1322.01750 | 3037.61380  | 1087.43090 | 2059.19000  | Detected    | Detected | Detected    | Detected    |
| 6533 | A_24_P1255    | BOCIP     | Hs.715543 | BRCA2 and CDKN1A interacting protein                                                     | Homo sapiens BRCA2 and CDKN1A interacting protein (BOCIP), transcript variant C, mRNA [NM_078469]                                                     | 2.21876 | down | 2.38699 | down | 65.14663   | 149.67029   | 47.64932   | 100.29369   | Detected    | Detected | Detected    | Detected    |
| 6534 | A_23_P73982   | TMEM48    | Hs.476525 | transmembrane protein 48                                                                 | Homo sapiens transmembrane protein 48 (TMEM48), mRNA [NM_018087]                                                                                      | 2.21765 | down | 2.25541 | down | 1190.70300 | 2734.19200  | 962.20795  | 1913.63450  | Detected    | Detected | Detected    | Detected    |
| 6535 | A_23_P77776   | SFRS2     | Hs.713672 | splicing factor, arginine/serine-rich 2                                                  | Homo sapiens splicing factor, arginine/serine-rich 2 (SFRS2), mRNA [NM_003016]                                                                        | 2.21719 | down | 2.22584 | down | 7738.89300 | 17767.02700 | 6691.68000 | 13133.90500 | Detected    | Detected | Detected    | Detected    |
| 6536 | A_23_P103070  | YWHAH     | Hs.226755 | tyrosine 3-monooxygenase/tryptophan 5-monooxygenase activation protein, eta polypeptide  | Homo sapiens tyrosine 3-monooxygenase/tryptophan 5-monooxygenase activation protein, eta polypeptide (YWHAH), mRNA [NM_003405]                        | 2.21696 | down | 2.15706 | down | 2437.30960 | 5595.00800  | 1686.43150 | 3207.72560  | Detected    | Detected | Detected    | Detected    |
| 6537 | A_33_P3399638 | ZNF257    | Hs.283900 | zinc finger protein 257                                                                  | Homo sapiens zinc finger protein 257 (ZNF257), mRNA [NM_033468]                                                                                       | 2.21638 | down | 2.97554 | down | 32.16019   | 73.80660    | 17.58391   | 46.13667    | Detected    | Detected | Detected    | Detected    |
| 6538 | A_32_P198923  | YWHAZ     | Hs.492407 | tyrosine 3-monooxygenase/tryptophan 5-monooxygenase activation protein, zeta polypeptide | Homo sapiens tyrosine 3-monooxygenase/tryptophan 5-monooxygenase activation protein, zeta polypeptide (YWHAZ), transcript variant 2, mRNA [NM_145690] | 2.21584 | down | 2.32424 | down | 866.70630  | 1988.58460  | 974.33890  | 1998.90050  | Detected    | Detected | Detected    | Detected    |
| 6539 | A_23_P139864  | GSG1      | Hs.240053 | germ cell associated 1                                                                   | Homo sapiens germ cell associated 1 (GSG1), transcript variant 1, mRNA [NM_031289]                                                                    | 2.21561 | down | 2.18257 | down | 139.54771  | 320.14725   | 110.96970  | 213.56856   | Detected    | Detected | Detected    | Detected    |
| 6540 | A_32_P40288   | TMEM200A  | Hs.591341 | transmembrane protein 200A                                                               | Homo sapiens transmembrane protein 200A (TMEM200A), mRNA [NM_052913]                                                                                  | 2.21461 | down | 2.11590 | down | 2395.80620 | 5493.92720  | 1687.06040 | 3147.67820  | Detected    | Detected | Detected    | Detected    |
| 6541 | A_23_P32143   | ALDOB     | Hs.530274 | aldolase B, fructose-bisphosphate                                                        | Homo sapiens aldolase B, fructose-bisphosphate (ALDOB), mRNA [NM_000035]                                                                              | 2.21429 | down | 1.70462 | down | 14.90303   | 34.16979    | 3.94471    | 5.92935     | Detected    | Detected | Compromised | Compromised |
| 6542 | A_23_P103877  | LRRRC38   | Hs.657356 | leucine rich repeat containing 38                                                        | Leucine-rich repeat-containing protein 38 Precursor [Source:UniProtKB/Swiss-Prot;Acc:Q5VT99] [ENST00000401092]                                        | 2.21400 | down | 5.20678 | down | 13.63118   | 31.24960    | 4.15942    | 19.09770    | Detected    | Detected | Compromised | Detected    |
| 6543 | A_33_P3375636 | FAM196B   | Hs.721917 | family with sequence similarity 196, member B                                            | Homo sapiens family with sequence similarity 196, member B (FAM196B), mRNA [NM_001129891]                                                             | 2.21390 | down | 2.78280 | down | 38.61979   | 88.53218    | 20.46457   | 50.21685    | Detected    | Detected | Detected    | Detected    |
| 6544 | A_33_P3219939 | CUBN      | Hs.166206 | cubilin (intrinsic factor-cobalamin receptor)                                            | Homo sapiens cubilin (intrinsic factor-cobalamin receptor) (CUBN), mRNA [NM_001081]                                                                   | 2.21340 | down | 1.82430 | down | 171.41138  | 392.85500   | 115.31191  | 185.49646   | Detected    | Detected | Detected    | Detected    |
| 6545 | A_33_P3241741 | SNORA23   | Hs.689720 | small nucleolar RNA, H/ACA box 23                                                        | Homo sapiens small nucleolar RNA, H/ACA box 23 (SNORA23), small nucleolar RNA [NR_002962]                                                             | 2.21338 | down | 1.58353 | down | 14.51758   | 33.27229    | 12.58132   | 17.56781    | Detected    | Detected | Detected    | Detected    |
| 6546 | A_33_P3256858 | C14orf80  | Hs.720306 | chromosome 14 open reading frame 80                                                      | Homo sapiens chromosome 14 open reading frame 80 (C14orf80), transcript variant 1, mRNA [NM_001134875]                                                | 2.21232 | down | 2.21657 | down | 3430.14280 | 7857.66600  | 3467.88180 | 6778.13700  | Detected    | Detected | Detected    | Detected    |
| 6547 | A_33_P3331282 | LOC648987 | Hs.655947 | hypothetical LOC648987                                                                   | PREDICTED: Homo sapiens hypothetical LOC648987 (LOC648987), miscRNA [XR_039981]                                                                       | 2.21207 | down | 2.71948 | down | 383.98892  | 879.52830   | 239.10092  | 573.36730   | Detected    | Detected | Detected    | Detected    |
| 6548 | A_33_P3385775 | ZNF703    | Hs.288042 | zinc finger protein 703                                                                  | Homo sapiens zinc finger protein 703 (ZNF703), mRNA [NM_025069]                                                                                       | 2.21201 | down | 2.38988 | down | 101.85399  | 233.29138   | 77.79172   | 163.93622   | Detected    | Detected | Detected    | Detected    |
| 6549 | A_23_P37598   | NPTN      | Hs.187866 | neuroplastin                                                                             | Homo sapiens neuroplastin (NPTN), transcript variant b, mRNA [NM_012428]                                                                              | 2.21192 | down | 2.22619 | down | 1284.58570 | 2942.15870  | 1297.20970 | 2546.46730  | Detected    | Detected | Detected    | Detected    |

|      |               |           |           |                                                                                                   |                                                                                                                                                                  |         |      |         |      |             |              |             |              |             |             |             |          |
|------|---------------|-----------|-----------|---------------------------------------------------------------------------------------------------|------------------------------------------------------------------------------------------------------------------------------------------------------------------|---------|------|---------|------|-------------|--------------|-------------|--------------|-------------|-------------|-------------|----------|
| 6550 | A_24_P34155   | RUNX1     | Hs.149261 | runx-related transcription factor 1                                                               | Homo sapiens runt-related transcription factor 1 (RUNX1), transcript variant 3, mRNA [NM_001122607]                                                              | 2.21151 | down | 2.17766 | down | 449.18616   | 1028.60380   | 363.80627   | 698.59467    | Detected    | Detected    | Detected    | Detected |
| 6551 | A_23_P75310   | ARHGAP22  | Hs.655672 | Rho GTPase activating protein 22                                                                  | Homo sapiens Rho GTPase activating protein 22 (ARHGAP22), mRNA [NM_021226]                                                                                       | 2.21131 | down | 2.40715 | down | 15794.79600 | 36165.71000  | 16419.27000 | 34851.61300  | Detected    | Detected    | Detected    | Detected |
| 6552 | A_33_P3409139 | LOC143188 | Hs.287723 | hypothetical LOC143188                                                                            | Homo sapiens hypothetical LOC143188 (LOC143188), non-coding RNA [NR_015409]                                                                                      | 2.21119 | down | 2.48823 | down | 85.88192    | 196.63460    | 64.53490    | 141.59593    | Detected    | Detected    | Detected    | Detected |
| 6553 | A_32_P142028  | HNRNPC    | Hs.508848 | heterogeneous nuclear ribonucleoprotein C (C1/C2)                                                 | Homo sapiens heterogeneous nuclear ribonucleoprotein C (C1/C2) (HNRNPC), transcript variant 1, mRNA [NM_031314]                                                  | 2.21069 | down | 2.06053 | down | 10926.21700 | 25011.00200  | 9146.25900  | 16618.37300  | Detected    | Detected    | Detected    | Detected |
| 6554 | A_23_P433798  | PODNL1    | Hs.448497 | podocan-like 1                                                                                    | Homo sapiens podocan-like 1 (PODNL1), transcript variant 1, mRNA [NM_024825]                                                                                     | 2.21065 | down | 2.59425 | down | 224.55165   | 514.00616    | 182.32948   | 417.09473    | Detected    | Detected    | Detected    | Detected |
| 6555 | A_33_P3335391 | FAM83G    | Hs.710727 | family with sequence similarity 83, member G                                                      | Homo sapiens family with sequence similarity 83, member G (FAM83G), mRNA [NM_001039999]                                                                          | 2.20944 | down | 2.74450 | down | 35.62516    | 81.50259     | 25.19721    | 60.97904     | Detected    | Detected    | Detected    | Detected |
| 6556 | A_24_P576506  | SPRN      | Hs.64968  | shadow of prion protein homolog (zebrafish)                                                       | Homo sapiens shadow of prion protein homolog (zebrafish) (SPRN), mRNA [NM_001012508]                                                                             | 2.20894 | down | 2.16263 | down | 75.31041    | 172.25533    | 78.42929    | 149.56343    | Detected    | Detected    | Detected    | Detected |
| 6557 | A_23_P120931  | APOBEC3C  | Hs.441124 | apolipoprotein B mRNA editing enzyme, catalytic polypeptide-like 3C                               | Homo sapiens apolipoprotein B mRNA editing enzyme, catalytic polypeptide-like 3C (APOBEC3C), mRNA [NM_014506]                                                    | 2.20879 | down | 2.62642 | down | 279.26300   | 638.70630    | 260.96160   | 604.37366    | Detected    | Detected    | Detected    | Detected |
| 6558 | A_33_P3307253 | AK5       | Hs.559718 | adenylate kinase 5                                                                                | Homo sapiens adenylate kinase 5 (AK5), transcript variant 1, mRNA [NM_174858]                                                                                    | 2.20775 | down | 2.15437 | down | 1281.09190  | 2928.61840   | 1071.80190  | 2036.10360   | Detected    | Detected    | Detected    | Detected |
| 6559 | A_23_P309396  | RP1L1     | Hs.33538  | retinitis pigmentosa 1-like 1                                                                     | Homo sapiens retinitis pigmentosa 1-like 1 (RP1L1), mRNA [NM_178857]                                                                                             | 2.20645 | down | 1.38606 | down | 18.20810    | 41.59976     | 14.71859    | 17.98921     | Detected    | Detected    | Detected    | Detected |
| 6560 | A_33_P3232508 | SMARCB1   | Hs.534350 | SWI/SNF related, matrix associated, actin dependent regulator of chromatin, subfamily b, member 1 | Homo sapiens SWI/SNF related, matrix associated, actin dependent regulator of chromatin, subfamily b, member 1 (SMARCB1), transcript variant 1, mRNA [NM_003073] | 2.20577 | down | 1.96705 | down | 6441.28300  | 14711.79400  | 3524.96660  | 6114.16200   | Detected    | Detected    | Detected    | Detected |
| 6561 | A_33_P3363061 | ERLIN2    | Hs.705490 | ER lipid raft associated 2                                                                        | Homo sapiens ER lipid raft associated 2 (ERLIN2), transcript variant 2, mRNA [NM_001003790]                                                                      | 2.20558 | down | 2.06523 | down | 116.49632   | 266.05243    | 138.86328   | 252.88371    | Detected    | Detected    | Detected    | Detected |
| 6562 | A_24_P95822   | NPTN      | Hs.187866 | neuroplastin                                                                                      | Homo sapiens neuroplastin (NPTN), transcript variant b, mRNA [NM_012428]                                                                                         | 2.20492 | down | 2.31994 | down | 434.33542   | 991.63390    | 572.98460   | 1172.15540   | Detected    | Detected    | Detected    | Detected |
| 6563 | A_32_P437004  | XG        | Hs.179675 | Xg blood group                                                                                    | Homo sapiens Xg blood group (XG), transcript variant 1, mRNA [NM_175569]                                                                                         | 2.20480 | down | 2.09547 | down | 590.04550   | 1347.06090   | 384.03537   | 709.60760    | Detected    | Detected    | Detected    | Detected |
| 6564 | A_33_P3283619 | SH2D1A    | Hs.349094 | SH2 domain protein 1A                                                                             | Homo sapiens SH2 domain protein 1A (SH2D1A), transcript variant 2, mRNA [NM_001114937]                                                                           | 2.20350 | down | 1.59366 | down | 28.77881    | 65.66265     | 18.72174    | 26.30914     | Detected    | Detected    | Detected    | Detected |
| 6565 | A_33_P3210278 | SYNE2     | Hs.525392 | spectrin repeat containing, nuclear envelope 2                                                    | Homo sapiens spectrin repeat containing, nuclear envelope 2 (SYNE2), transcript variant 5, mRNA [NM_182914]                                                      | 2.20264 | down | 2.06869 | down | 372.47934   | 849.52950    | 220.72856   | 402.64276    | Detected    | Detected    | Detected    | Detected |
| 6566 | A_33_P3264013 |           |           |                                                                                                   | PRO2176 [Source:UniProtKB/TrEMBL;Acc:Q9P181] [ENST00000430036]                                                                                                   | 2.20253 | down | 1.65263 | down | 19.98295    | 45.57377     | 23.41162    | 34.11706     | Detected    | Detected    | Detected    | Detected |
| 6567 | A_24_P203056  | BCL7A     | Hs.530970 | B-cell CLL/lymphoma 7A                                                                            | Homo sapiens B-cell CLL/lymphoma 7A (BCL7A), transcript variant 1, mRNA [NM_020993]                                                                              | 2.20126 | down | 2.22491 | down | 432.36743   | 985.49976    | 329.79092   | 647.01917    | Detected    | Detected    | Detected    | Detected |
| 6568 | A_23_P3963    | CDR2L     | Hs.78358  | cerebellar degeneration-related protein 2-like                                                    | Homo sapiens cerebellar degeneration-related protein 2-like (CDR2L), mRNA [NM_014603]                                                                            | 2.20052 | down | 2.38232 | down | 3247.87920  | 7400.44040   | 3290.75560  | 6912.90530   | Detected    | Detected    | Detected    | Detected |
| 6569 | A_23_P359043  | AKAP2     | Hs.591908 | A kinase (PRKA) anchor protein 2                                                                  | Homo sapiens A kinase (PRKA) anchor protein 2 (AKAP2), transcript variant 1, mRNA [NM_001004065]                                                                 | 2.19991 | down | 2.33923 | down | 453.33070   | 1032.64990   | 394.38235   | 813.49830    | Detected    | Detected    | Detected    | Detected |
| 6570 | A_33_P3285545 | CLDN4     | Hs.699253 | claudin 4                                                                                         | Homo sapiens claudin 4 (CLDN4), mRNA [NM_001305]                                                                                                                 | 2.19954 | down | 2.59778 | down | 1615.09680  | 3678.43970   | 1205.41520  | 2761.24600   | Detected    | Detected    | Detected    | Detected |
| 6571 | A_24_P72479   | ARPC1A    | Hs.124126 | actin related protein 2/3 complex, subunit 1A, 41kDa                                              | Homo sapiens actin related protein 2/3 complex, subunit 1A, 41kDa (ARPC1A), mRNA [NM_006409]                                                                     | 2.19934 | down | 2.34469 | down | 7425.28470  | 16909.78100  | 7775.52100  | 16076.08600  | Detected    | Detected    | Detected    | Detected |
| 6572 | A_33_P3382714 | LOC144742 | Hs.524782 | hypothetical LOC144742                                                                            | Homo sapiens hypothetical LOC144742 (LOC144742), non-coding RNA [NR_024246]                                                                                      | 2.19924 | down | 7.03967 | down | 2.35740     | 5.36833      | 5.36713     | 33.31650     | Compromised | Compromised | Compromised | Detected |
| 6573 | A_33_P3252043 | P4HB      | Hs.464336 | prolyl 4-hydroxylase, beta polypeptide                                                            | Homo sapiens prolyl 4-hydroxylase, beta polypeptide (P4HB), mRNA [NM_000918]                                                                                     | 2.19919 | down | 2.02303 | down | 82924.01600 | 188831.89000 | 70275.71000 | 125364.23000 | Detected    | Detected    | Detected    | Detected |
| 6574 | A_24_P726336  | PHACTR2   | Hs.102471 | phosphatase and actin regulator 2                                                                 | Homo sapiens phosphatase and actin regulator 2 (PHACTR2), transcript variant 1, mRNA [NM_001100164]                                                              | 2.19893 | down | 1.91294 | down | 1769.84560  | 4029.77170   | 798.20496   | 1346.41910   | Detected    | Detected    | Detected    | Detected |
| 6575 | A_23_P11461   | UBE2V1    | Hs.719899 | ubiquitin-conjugating enzyme E2 variant 1                                                         | Homo sapiens ubiquitin-conjugating enzyme E2 variant 1 (UBE2V1), transcript variant 4, mRNA [NM_001032286]                                                       | 2.19858 | down | 2.15275 | down | 1541.40140  | 3509.06200   | 1217.36410  | 2310.89550   | Detected    | Detected    | Detected    | Detected |
| 6576 | A_32_P76720   | NT5DC3    | Hs.48428  | 5'-nucleotidase domain containing 3                                                               | Homo sapiens 5'-nucleotidase domain containing 3 (NT5DC3), mRNA [NM_001031701]                                                                                   | 2.19780 | down | 1.99518 | down | 128.66261   | 292.80167    | 105.41978   | 185.46863    | Detected    | Detected    | Detected    | Detected |
| 6577 | A_23_P52402   | PITRM1    | Hs.528300 | pitrilysin metalloproteinase 1                                                                    | Homo sapiens pitrilysin metalloproteinase 1 (PITRM1), mRNA [NM_014889]                                                                                           | 2.19776 | down | 2.16201 | down | 2844.84520  | 6473.98600   | 2715.27270  | 5176.50240   | Detected    | Detected    | Detected    | Detected |
| 6578 | A_23_P92860   | CCNO      | Hs.3041   | cyclin O                                                                                          | Homo sapiens cyclin O (CCNO), mRNA [NM_021147]                                                                                                                   | 2.19578 | down | 2.30498 | down | 82.25579    | 187.02054    | 74.60291    | 151.63116    | Detected    | Detected    | Detected    | Detected |

|      |               |           |           |                                                                                          |                                                                                                                                                        |         |      |         |      |             |             |             |             |             |             |             |             |
|------|---------------|-----------|-----------|------------------------------------------------------------------------------------------|--------------------------------------------------------------------------------------------------------------------------------------------------------|---------|------|---------|------|-------------|-------------|-------------|-------------|-------------|-------------|-------------|-------------|
| 6579 | A_33_P3327762 |           |           |                                                                                          | Dedicator of cytokinesis protein 8 [Source:UniProtKB/Swiss-Prot;Acc:Q8NFS0] [ENST00000382331]                                                          | 2.19548 | down | 1.44539 | down | 39.62342    | 90.07700    | 19.49684    | 24.84941    | Detected    | Detected    | Detected    | Detected    |
| 6580 | A_33_P3263851 | FLJ46020  | Hs.532855 | FLJ46020 protein                                                                         | PREDICTED: Homo sapiens FLJ46020 protein (FLJ46020), miscRNA [XR_041641]                                                                               | 2.19481 | down | 2.12869 | down | 173.36047   | 393.98602   | 29.31283    | 55.02189    | Detected    | Detected    | Detected    | Detected    |
| 6581 | A_24_P123245  | HNRNPD    | Hs.480073 | heterogeneous nuclear ribonucleoprotein D (AU-rich element RNA binding protein 1, 37kDa) | Homo sapiens heterogeneous nuclear ribonucleoprotein D (AU-rich element RNA binding protein 1, 37kDa) (HNRNPD), transcript variant 1, mRNA [NM_031370] | 2.19480 | down | 2.02428 | down | 634.89460   | 1442.87630  | 581.71850   | 1038.36490  | Detected    | Detected    | Detected    | Detected    |
| 6582 | A_33_P3297921 | MRPL37    | Hs.584908 | mitochondrial ribosomal protein L37                                                      | Homo sapiens mitochondrial ribosomal protein L37 (MRPL37), nuclear gene encoding mitochondrial protein, mRNA [NM_016491]                               | 2.19457 | down | 2.33190 | down | 3307.95040  | 7516.95500  | 4147.50050  | 8528.30100  | Detected    | Detected    | Detected    | Detected    |
| 6583 | A_33_P3341586 | SIL1      | Hs.483521 | SIL1 homolog, endoplasmic reticulum chaperone (S. cerevisiae)                            | Homo sapiens SIL1 homolog, endoplasmic reticulum chaperone (S. cerevisiae) (SIL1), transcript variant 1, mRNA [NM_001037633]                           | 2.19275 | down | 2.65184 | down | 1256.88680  | 2853.77100  | 1107.59270  | 2589.95920  | Detected    | Detected    | Detected    | Detected    |
| 6584 | A_23_P91814   | SLC25A38  | Hs.369615 | solute carrier family 25, member 38                                                      | Homo sapiens solute carrier family 25, member 38 (SLC25A38), mRNA [NM_017875]                                                                          | 2.19252 | down | 2.24911 | down | 1091.84700  | 2478.78800  | 774.11500   | 1535.26230  | Detected    | Detected    | Detected    | Detected    |
| 6585 | A_23_P54991   | DYNLL2    | Hs.720595 | dynein, light chain, LC8-type 2                                                          | Homo sapiens dynein, light chain, LC8-type 2 (DYNLL2), mRNA [NM_080677]                                                                                | 2.19237 | down | 2.08443 | down | 7038.04100  | 15977.13700 | 5899.97070  | 10844.34700 | Detected    | Detected    | Detected    | Detected    |
| 6586 | A_33_P3406493 | GABBR2    | Hs.198612 | gamma-aminobutyric acid (GABA) B receptor, 2                                             | Homo sapiens gamma-aminobutyric acid (GABA) B receptor, 2 (GABBR2), mRNA [NM_005458]                                                                   | 2.19175 | down | 2.10294 | down | 1325.41870  | 3007.99880  | 1160.16000  | 2151.34890  | Detected    | Detected    | Detected    | Detected    |
| 6587 | A_23_P430181  | ZBTB3     | Hs.147554 | zinc finger and BTB domain containing 3                                                  | Homo sapiens zinc finger and BTB domain containing 3 (ZBTB3), mRNA [NM_024784]                                                                         | 2.19151 | down | 2.34380 | down | 455.60938   | 1033.87870  | 369.34000   | 763.32860   | Detected    | Detected    | Detected    | Detected    |
| 6588 | A_33_P3220857 |           |           |                                                                                          | UPF0553 protein C9orf64 [Source:UniProtKB/Swiss-Prot;Acc:Q5T8V5] [ENST00000376340]                                                                     | 2.19098 | down | 2.09181 | down | 56.42101    | 128.00050   | 69.20654    | 127.65440   | Detected    | Detected    | Detected    | Detected    |
| 6589 | A_23_P62907   | ATF6      | Hs.492740 | activating transcription factor 6                                                        | Homo sapiens activating transcription factor 6 (ATF6), mRNA [NM_007348]                                                                                | 2.19091 | down | 2.25484 | down | 1513.13700  | 3432.69240  | 1265.10240  | 2515.40260  | Detected    | Detected    | Detected    | Detected    |
| 6590 | A_23_P428184  | HIST1H2AD | Hs.679229 | histone cluster 1, H2ad                                                                  | Homo sapiens histone cluster 1, H2ad (HIST1H2AD), mRNA [NM_021065]                                                                                     | 2.19023 | down | 2.92954 | down | 2691.97850  | 6105.12300  | 1796.40610  | 4640.54800  | Detected    | Detected    | Detected    | Detected    |
| 6591 | A_24_P3973    | HNRNPA2B1 | Hs.487774 | heterogeneous nuclear ribonucleoprotein A2/B1                                            | Homo sapiens heterogeneous nuclear ribonucleoprotein A2/B1 (HNRNPA2B1), transcript variant A2, mRNA [NM_002137]                                        | 2.19003 | down | 2.13313 | down | 4330.20100  | 9819.52400  | 4228.98540  | 7954.62740  | Detected    | Detected    | Detected    | Detected    |
| 6592 | A_32_P120895  | LYSMD2    | Hs.603629 | LysM, putative peptidoglycan-binding, domain containing 2                                | Homo sapiens LysM, putative peptidoglycan-binding, domain containing 2 (LYSMD2), transcript variant 1, mRNA [NM_153374]                                | 2.18994 | down | 2.39070 | down | 1514.78320  | 3434.91900  | 1077.56040  | 2271.60620  | Detected    | Detected    | Detected    | Detected    |
| 6593 | A_33_P3302245 | TMEM59L   | Hs.329850 | transmembrane protein 59-like                                                            | Homo sapiens transmembrane protein 59-like (TMEM59L), mRNA [NM_012109]                                                                                 | 2.18806 | down | 2.36696 | down | 261.44644   | 592.34500   | 155.50412   | 324.56195   | Detected    | Detected    | Detected    | Detected    |
| 6594 | A_33_P3353866 | MOGAT2    | Hs.288568 | monoacylglycerol O-acyltransferase 2                                                     | Homo sapiens monoacylglycerol O-acyltransferase 2 (MOGAT2), mRNA [NM_025098]                                                                           | 2.18718 | down | 2.96239 | down | 2.67834     | 6.06573     | 9.13182     | 23.85420    | Compromised | Compromised | Compromised | Detected    |
| 6595 | A_33_P3323555 | TOMM34    | Hs.517066 | translocase of outer mitochondrial membrane 34                                           | Homo sapiens translocase of outer mitochondrial membrane 34 (TOMM34), nuclear gene encoding mitochondrial protein, mRNA [NM_006809]                    | 2.18524 | down | 2.20352 | down | 18867.17000 | 42891.22300 | 22549.02300 | 43813.86000 | Detected    | Detected    | Detected    | Detected    |
| 6596 | A_33_P3307408 |           |           |                                                                                          |                                                                                                                                                        | 2.18485 | down | 1.12742 | down | 11.33737    | 25.64879    | 9.59873     | 9.54254     | Compromised | Detected    | Compromised | Compromised |
| 6597 | A_33_P3261648 | ANKRD36B  | Hs.532921 | ankyrin repeat domain 36B                                                                | Homo sapiens ankyrin repeat domain 36B (ANKRD36B), mRNA [NM_025190]                                                                                    | 2.18474 | down | 2.66444 | down | 165.64880   | 374.73190   | 130.81260   | 307.34146   | Detected    | Detected    | Detected    | Detected    |
| 6598 | A_23_P112187  | FIBCD1    | Hs.133205 | fibrinogen C domain containing 1                                                         | Homo sapiens fibrinogen C domain containing 1 (FIBCD1), transcript variant 1, mRNA [NM_032843]                                                         | 2.18366 | down | 2.00484 | down | 26.56942    | 60.07597    | 31.03868    | 54.87181    | Detected    | Detected    | Detected    | Detected    |
| 6599 | A_33_P3399248 | UFM1      | Hs.643655 | ubiquitin-fold modifier 1                                                                | Homo sapiens ubiquitin-fold modifier 1 (UFM1), mRNA [NM_016617]                                                                                        | 2.18363 | down | 2.09212 | down | 1434.22570  | 3242.87430  | 1161.77090  | 2143.24540  | Detected    | Detected    | Detected    | Detected    |
| 6600 | A_33_P3268622 | LY6D      | Hs.415762 | lymphocyte antigen 6 complex, locus D                                                    | Homo sapiens lymphocyte antigen 6 complex, locus D (LY6D), mRNA [NM_003695]                                                                            | 2.18312 | down | 1.13561 | down | 8.17037     | 18.46939    | 8.87656     | 8.88870     | Compromised | Detected    | Compromised | Compromised |
| 6601 | A_33_P3420633 | C16orf11  | Hs.632220 | chromosome 16 open reading frame 11                                                      | Homo sapiens chromosome 16 open reading frame 11 (C16orf11), mRNA [NM_145270]                                                                          | 2.18260 | down | 2.75092 | down | 12.35978    | 27.93304    | 8.52370     | 20.67623    | Compromised | Detected    | Compromised | Detected    |
| 6602 | A_24_P42681   | PSMD2     | Hs.518464 | proteasome (prosome, macropain) 26S subunit, non-ATPase, 2                               | Homo sapiens proteasome (prosome, macropain) 26S subunit, non-ATPase, 2 (PSMD2), mRNA [NM_002808]                                                      | 2.18251 | down | 2.29864 | down | 15062.32000 | 34039.36300 | 12046.03400 | 24416.29700 | Detected    | Detected    | Detected    | Detected    |
| 6603 | A_24_P382319  | CEACAM1   | Hs.512682 | carcinoembryonic antigen-related cell adhesion molecule 1 (biliary glycoprotein)         | Homo sapiens carcinoembryonic antigen-related cell adhesion molecule 1 (biliary glycoprotein) (CEACAM1), transcript variant 1, mRNA [NM_001712]        | 2.18203 | down | 4.21242 | down | 22.78962    | 51.49088    | 2.96325     | 11.00689    | Detected    | Detected    | Compromised | Compromised |
| 6604 | A_33_P3385477 | ATAD3B    | Hs.23413  | ATPase family, AAA domain containing 3B                                                  | Homo sapiens ATPase family, AAA domain containing 3B (ATAD3B), mRNA [NM_031921]                                                                        | 2.18112 | down | 2.22010 | down | 11669.33000 | 26354.74000 | 10203.61300 | 19975.23600 | Detected    | Detected    | Detected    | Detected    |
| 6605 | A_33_P3235987 | PIN4      | Hs.655623 | protein (peptidylprolyl cis/trans isomerase) NIMA-interacting, 4 (parvulin)              | Homo sapiens protein (peptidylprolyl cis/trans isomerase) NIMA-interacting, 4 (parvulin) (PIN4), mRNA [NM_006223]                                      | 2.18080 | down | 2.12227 | down | 1988.29150  | 4489.82470  | 1473.16470  | 2786.87960  | Detected    | Detected    | Detected    | Detected    |
| 6606 | A_33_P3407289 | LOC283788 |           | FSHD region gene 1 pseudogene                                                            | Homo sapiens FSHD region gene 1 pseudogene (LOC283788), non-coding RNA [NR_027436]                                                                     | 2.17931 | down | 1.72880 | down | 12.53490    | 28.28611    | 15.51859    | 23.65715    | Detected    | Detected    | Detected    | Detected    |
| 6607 | A_23_P128974  | BATF      | Hs.509964 | basic leucine zipper transcription factor, ATF-like                                      | Homo sapiens basic leucine zipper transcription factor, ATF-like (BATF), mRNA [NM_006399]                                                              | 2.17908 | down | 1.86728 | down | 57.07332    | 128.77748   | 65.73505    | 108.23628   | Detected    | Detected    | Detected    | Detected    |

|      |               |              |           |                                                                     |                                                                                                                                                  |         |      |         |      |             |             |             |             |             |          |             |             |
|------|---------------|--------------|-----------|---------------------------------------------------------------------|--------------------------------------------------------------------------------------------------------------------------------------------------|---------|------|---------|------|-------------|-------------|-------------|-------------|-------------|----------|-------------|-------------|
| 6608 | A_23_P101521  | C19orf41     | Hs.414175 | chromosome 19 open reading frame 41                                 | Homo sapiens chromosome 19 open reading frame 41 (C19orf41), mRNA [NM_152358]                                                                    | 2.17841 | down | 1.04051 | down | 9.57179     | 21.59066    | 4.23034     | 3.88139     | Compromised | Detected | Compromised | Compromised |
| 6609 | A_32_P190416  | MAP7         | Hs.486548 | microtubule-associated protein 7                                    | Homo sapiens microtubule-associated protein 7 (MAP7), mRNA [NM_003980]                                                                           | 2.17806 | down | 1.37351 | down | 19.18441    | 43.26650    | 18.33527    | 22.20676    | Detected    | Detected | Detected    | Detected    |
| 6610 | A_23_P256773  | TSSC1        | Hs.502770 | tumor suppressing subtransferable candidate 1                       | Homo sapiens tumor suppressing subtransferable candidate 1 (TSSC1), mRNA [NM_003310]                                                             | 2.17803 | down | 2.19124 | down | 2439.29540  | 5501.24660  | 2752.17460  | 5317.79250  | Detected    | Detected | Detected    | Detected    |
| 6611 | A_23_P45864   | TNR          | Hs.659864 | tenascin R (restrictin, janusin)                                    | Homo sapiens tenascin R (restrictin, janusin) (TNR), mRNA [NM_003285]                                                                            | 2.17771 | down | 1.93524 | down | 262.72310   | 592.42130   | 74.08782    | 126.42899   | Detected    | Detected | Detected    | Detected    |
| 6612 | A_23_P112512  | MCART1       | Hs.645492 | mitochondrial carrier triple repeat 1                               | Homo sapiens mitochondrial carrier triple repeat 1 (MCART1), nuclear gene encoding mitochondrial protein, transcript variant 1, mRNA [NM_033412] | 2.17695 | down | 1.87604 | down | 243.80495   | 549.57150   | 234.20000   | 387.43045   | Detected    | Detected | Detected    | Detected    |
| 6613 | A_24_P42501   | ACOT9        | Hs.298885 | acyl-CoA thioesterase 9                                             | Homo sapiens acyl-CoA thioesterase 9 (ACOT9), transcript variant 1, mRNA [NM_001037171]                                                          | 2.17695 | down | 2.29290 | down | 1966.19370  | 4432.07230  | 1740.85940  | 3519.77420  | Detected    | Detected | Detected    | Detected    |
| 6614 | A_23_P89343   | SNX11        | Hs.15827  | sorting nexin 11                                                    | Homo sapiens sorting nexin 11 (SNX11), transcript variant 1, mRNA [NM_192244]                                                                    | 2.17586 | down | 2.07418 | down | 446.66904   | 1006.35333  | 440.48248   | 805.63904   | Detected    | Detected | Detected    | Detected    |
| 6615 | A_23_P130304  | TXNL4A       | Hs.465498 | thioredoxin-like 4A                                                 | Homo sapiens thioredoxin-like 4A (TXNL4A), mRNA [NM_006701]                                                                                      | 2.17584 | down | 2.19583 | down | 12271.70300 | 27648.11100 | 10339.89400 | 20020.75000 | Detected    | Detected | Detected    | Detected    |
| 6616 | A_33_P3700794 | METTL1       | Hs.42957  | methyltransferase like 1                                            | Homo sapiens methyltransferase like 1 (METTL1), transcript variant 1, mRNA [NM_005371]                                                           | 2.17538 | down | 2.38640 | down | 839.50720   | 1891.00350  | 857.11346   | 1803.62630  | Detected    | Detected | Detected    | Detected    |
| 6617 | A_33_P3287785 | NEFL         | Hs.521461 | neurofilament, light polypeptide                                    | Homo sapiens neurofilament, light polypeptide (NEFL), mRNA [NM_006158]                                                                           | 2.17517 | down | 2.03799 | down | 14.31782    | 32.24802    | 12.74158    | 22.89769    | Detected    | Detected | Compromised | Detected    |
| 6618 | A_23_P406591  | LOC441046    | Hs.135705 | glucuronidase, beta pseudogene                                      | Homo sapiens glucuronidase, beta pseudogene (LOC441046), non-coding RNA [NR_003675]                                                              | 2.17508 | down | 1.73658 | down | 55.68340    | 125.41071   | 40.23959    | 61.61880    | Detected    | Detected | Detected    | Detected    |
| 6619 | A_24_P136161  | HNRNPCL1     | Hs.502617 | heterogeneous nuclear ribonucleoprotein C-like 1                    | Homo sapiens heterogeneous nuclear ribonucleoprotein C-like 1 (HNRNPCL1), mRNA [NM_001013631]                                                    | 2.17499 | down | 2.00443 | down | 238.24250   | 536.55000   | 73.76955    | 130.38678   | Detected    | Detected | Detected    | Detected    |
| 6620 | A_33_P330413  |              |           |                                                                     |                                                                                                                                                  | 2.17481 | down | 2.07962 | down | 2320.49340  | 5225.58740  | 2252.40400  | 4130.44400  | Detected    | Detected | Detected    | Detected    |
| 6621 | A_23_P70148   | NNT          | Hs.482043 | nicotinamide nucleotide transhydrogenase                            | Homo sapiens nicotinamide nucleotide transhydrogenase (NNT), nuclear gene encoding mitochondrial protein, transcript variant 2, mRNA [NM_182977] | 2.17417 | down | 2.15887 | down | 293.24970   | 660.18340   | 212.52597   | 404.57920   | Detected    | Detected | Detected    | Detected    |
| 6622 | A_33_P3235217 | CTPS         | Hs.473087 | CTP synthase                                                        | Homo sapiens CTP synthase (CTPS), mRNA [NM_001905]                                                                                               | 2.17317 | down | 2.38314 | down | 4127.44730  | 9287.70000  | 3256.01560  | 6842.28760  | Detected    | Detected | Detected    | Detected    |
| 6623 | A_23_P210708  | SIRPA        | Hs.581021 | signal-regulatory protein alpha                                     | Homo sapiens signal-regulatory protein alpha (SIRPA), transcript variant 1, mRNA [NM_001040022]                                                  | 2.17299 | down | 1.96082 | down | 2217.69950  | 4989.91850  | 2030.40750  | 3510.64920  | Detected    | Detected | Detected    | Detected    |
| 6624 | A_32_P452655  | LGALS9C      | Hs.462402 | lectin, galactoside-binding, soluble, 9C                            | Homo sapiens lectin, galactoside-binding, soluble, 9C (LGALS9C), mRNA [NM_001040078]                                                             | 2.17266 | down | 2.91759 | down | 711.22070   | 1600.03260  | 484.56857   | 1246.65110  | Detected    | Detected | Detected    | Detected    |
| 6625 | A_23_P15542   | HSD17B1      | Hs.654385 | hydroxysteroid (17-beta) dehydrogenase 1                            | Homo sapiens hydroxysteroid (17-beta) dehydrogenase 1 (HSD17B1), mRNA [NM_000413]                                                                | 2.17252 | down | 2.24347 | down | 256.48900   | 576.98690   | 260.58770   | 515.51294   | Detected    | Detected | Detected    | Detected    |
| 6626 | A_24_P116871  | TXNL4A       | Hs.465498 | thioredoxin-like 4A                                                 | Homo sapiens thioredoxin-like 4A (TXNL4A), mRNA [NM_006701]                                                                                      | 2.17205 | down | 2.05948 | down | 3482.01590  | 7831.30300  | 2410.92260  | 4378.30030  | Detected    | Detected | Detected    | Detected    |
| 6627 | A_24_P340066  | ELF4         | Hs.271940 | E74-like factor 4 (ets domain transcription factor)                 | Homo sapiens E74-like factor 4 (ets domain transcription factor) (ELF4), transcript variant 1, mRNA [NM_001421]                                  | 2.17182 | down | 2.07762 | down | 4249.67240  | 9556.79400  | 2904.52300  | 5321.16460  | Detected    | Detected | Detected    | Detected    |
| 6628 | A_23_P128246  | FICD         | Hs.661891 | FIC domain containing                                               | Homo sapiens FIC domain containing (FICD), mRNA [NM_007076]                                                                                      | 2.17180 | down | 2.33777 | down | 289.04837   | 650.01400   | 336.16672   | 692.98250   | Detected    | Detected | Detected    | Detected    |
| 6629 | A_33_P3273328 | LOC100131700 | Hs.149540 | similar to Quinone oxidoreductase-like protein 2                    | PREDICTED: Homo sapiens similar to mCG15963 (LOC100131700), miscRNA [XR_078881]                                                                  | 2.17148 | down | 1.22567 | down | 24.28950    | 54.61445    | 49.68618    | 53.69992    | Detected    | Detected | Detected    | Detected    |
| 6630 | A_24_P362540  | ASAP2        | Hs.555902 | ArFGAP with SH3 domain, ankyrin repeat and PH domain 2              | Homo sapiens ArFGAP with SH3 domain, ankyrin repeat and PH domain 2 (ASAP2), transcript variant 1, mRNA [NM_003887]                              | 2.17020 | down | 2.07080 | down | 1355.60160  | 3046.24410  | 1115.06370  | 2036.11710  | Detected    | Detected | Detected    | Detected    |
| 6631 | A_23_P10232   | BANK1        | Hs.480400 | B-cell scaffold protein with ankyrin repeats 1                      | Homo sapiens B-cell scaffold protein with ankyrin repeats 1 (BANK1), transcript variant 1, mRNA [NM_017935]                                      | 2.17008 | down | 2.62483 | down | 17.54608    | 39.42660    | 8.68094     | 20.09248    | Detected    | Detected | Compromised | Detected    |
| 6632 | A_23_P168788  | PLOD3        | Hs.153357 | procollagen-lysine, 2-oxoglutarate 5-dioxygenase 3                  | Homo sapiens procollagen-lysine, 2-oxoglutarate 5-dioxygenase 3 (PLOD3), mRNA [NM_001084]                                                        | 2.16928 | down | 2.30571 | down | 17292.94700 | 38843.41000 | 16413.13900 | 33370.40000 | Detected    | Detected | Detected    | Detected    |
| 6633 | A_33_P3307144 | GRIK2        | Hs.98262  | glutamate receptor, ionotropic, kainate 2                           | Homo sapiens glutamate receptor, ionotropic, kainate 2 (GRIK2), transcript variant 1, mRNA [NM_021956]                                           | 2.16919 | down | 1.98364 | down | 15.54582    | 34.91761    | 16.67583    | 29.16857    | Detected    | Detected | Detected    | Detected    |
| 6634 | A_33_P3264238 | ZNF280B      | Hs.43834  | zinc finger protein 280B                                            | Homo sapiens zinc finger protein 280B (ZNF280B), mRNA [NM_000764]                                                                                | 2.16913 | down | 2.03333 | down | 35.16718    | 78.98707    | 28.82525    | 51.68283    | Detected    | Detected | Detected    | Detected    |
| 6635 | A_33_P3262181 | APOBEC3F     | Hs.659809 | apolipoprotein B mRNA editing enzyme, catalytic polypeptide-like 3F | Homo sapiens apolipoprotein B mRNA editing enzyme, catalytic polypeptide-like 3F (APOBEC3F), transcript variant 2, mRNA [NM_001006666]           | 2.16886 | down | 2.16711 | down | 255.86127   | 574.60460   | 261.54220   | 499.79044   | Detected    | Detected | Detected    | Detected    |
| 6636 | A_32_P1701    | POLA1        | Hs.567319 | polymerase (DNA directed), alpha 1, catalytic subunit               | Homo sapiens polymerase (DNA directed), alpha 1, catalytic subunit (POLA1), mRNA [NM_016937]                                                     | 2.16778 | down | 2.20134 | down | 538.22205   | 1208.12100  | 427.85107   | 830.51184   | Detected    | Detected | Detected    | Detected    |
| 6637 | A_33_P3622472 | ARD1A        | Hs.433291 | ARD1 homolog A, N-acetyltransferase (S. cerevisiae)                 | Homo sapiens ARD1 homolog A, N-acetyltransferase (S. cerevisiae) (ARD1A), mRNA [NM_003491]                                                       | 2.16747 | down | 2.29609 | down | 1387.99390  | 3115.10960  | 1655.42020  | 3351.67970  | Detected    | Detected | Detected    | Detected    |
| 6638 | A_32_P50522   | FKBP1A       | Hs.471933 | FK506 binding protein 1A, 12kDa                                     | Homo sapiens FK506 binding protein 1A, 12kDa (FKBP1A), transcript variant 12B, mRNA [NM_000801]                                                  | 2.16713 | down | 1.81621 | down | 3301.25300  | 7407.93900  | 2429.05830  | 3890.18210  | Detected    | Detected | Detected    | Detected    |

|      |               |            |           |                                                                          |                                                                                                                                             |         |      |          |      |             |              |             |              |             |             |             |             |
|------|---------------|------------|-----------|--------------------------------------------------------------------------|---------------------------------------------------------------------------------------------------------------------------------------------|---------|------|----------|------|-------------|--------------|-------------|--------------|-------------|-------------|-------------|-------------|
| 6639 | A_24_P127121  | LOC644563  | Hs.648342 | similar to general transcription factor IIIc, polypeptide 6, alpha 35kDa | PREDICTED: Homo sapiens similar to general transcription factor IIIc, polypeptide 6, alpha 35kDa [LOC644563], miscRNA [XR_016572]           | 2.16687 | down | 1.98408  | down | 12969.14700 | 29098.90400  | 9248.16000  | 16180.07500  | Detected    | Detected    | Detected    | Detected    |
| 6640 | A_23_P109345  | PTTG1IP    | Hs.474010 | pituitary tumor-transforming 1 interacting protein                       | Homo sapiens pituitary tumor-transforming 1 interacting protein (PTTG1IP), mRNA [NM_004339]                                                 | 2.16643 | down | 2.25716  | down | 10179.49500 | 22835.09000  | 9968.43750  | 19840.63700  | Detected    | Detected    | Detected    | Detected    |
| 6641 | A_33_P3326898 |            |           |                                                                          |                                                                                                                                             | 2.16637 | down | 2.20252  | down | 497.45220   | 1115.87780   | 171.67195   | 333.41410    | Detected    | Detected    | Detected    | Detected    |
| 6642 | A_32_P119197  | TPM3       | Hs.644306 | tropomyosin 3                                                            | Homo sapiens tropomyosin 3 (TPM3), transcript variant 3, mRNA [NM_001043352]                                                                | 2.16631 | down | 2.23650  | down | 138.41902   | 310.49130    | 96.61615    | 190.53928    | Detected    | Detected    | Detected    | Detected    |
| 6643 | A_23_P118038  | NUTF2      | Hs.356630 | nuclear transport factor 2                                               | Homo sapiens nuclear transport factor 2 (NUTF2), mRNA [NM_005796]                                                                           | 2.16548 | down | 2.30862  | down | 3111.92360  | 6977.74950   | 3522.37650  | 7170.55900   | Detected    | Detected    | Detected    | Detected    |
| 6644 | A_23_P9018    | DEFB104B   | Hs.559507 | defensin, beta 104B                                                      | Homo sapiens defensin, beta 104B (DEFB104B), mRNA [NM_001040702]                                                                            | 2.16397 | down | 1.25285  | down | 9.49195     | 21.26865     | 9.11904     | 10.07428     | Compromised | Detected    | Compromised | Compromised |
| 6645 | A_33_P3294053 | ANKRD39    | Hs.709507 | ankyrin repeat domain 39                                                 | Homo sapiens ankyrin repeat domain 39 (ANKRD39), mRNA [NM_016466]                                                                           | 2.16391 | down | 2.09737  | down | 3466.96730  | 7768.21530   | 2636.70100  | 4876.42720   | Detected    | Detected    | Detected    | Detected    |
| 6646 | A_24_P860703  | LOC388796  | Hs.400876 | hypothetical LOC388796                                                   | Homo sapiens hypothetical LOC388796 (LOC388796), transcript variant 1, non-coding RNA [NR_015366]                                           | 2.16342 | down | 2.18849  | down | 5176.01270  | 11594.97600  | 3396.51000  | 6554.54050   | Detected    | Detected    | Detected    | Detected    |
| 6647 | A_23_P98898   | CDK2       | Hs.19192  | cyclin-dependent kinase 2                                                | Homo sapiens cyclin-dependent kinase 2 (CDK2), transcript variant 1, mRNA [NM_001796]                                                       | 2.16317 | down | 2.55400  | down | 86.59659    | 193.96509    | 74.40871    | 167.57513    | Detected    | Detected    | Detected    | Detected    |
| 6648 | A_33_P3403153 | C1QTNF2    | Hs.110062 | C1q and tumor necrosis factor related protein 2                          | Homo sapiens C1q and tumor necrosis factor related protein 2 (C1QTNF2), mRNA [NM_031908]                                                    | 2.16223 | down | 3.39319  | down | 20.84400    | 46.66761     | 9.08190     | 27.17382     | Detected    | Detected    | Compromised | Detected    |
| 6649 | A_23_P166686  | AMOTL2     | Hs.426312 | angiomin like 2                                                          | Homo sapiens angiomin like 2 (AMOTL2), mRNA [NM_016201]                                                                                     | 2.16181 | down | 2.14964  | down | 12692.48700 | 28411.76600  | 13985.12500 | 26509.26600  | Detected    | Detected    | Detected    | Detected    |
| 6650 | A_23_P201655  | MYCBP      | Hs.591506 | c-myc binding protein                                                    | Homo sapiens c-myc binding protein (MYCBP), mRNA [NM_012333]                                                                                | 2.16168 | down | 2.10234  | down | 1536.59750  | 3439.41330   | 1327.78820  | 2461.48970   | Detected    | Detected    | Detected    | Detected    |
| 6651 | A_33_P3360392 | NCRNA00092 | Hs.434310 | non-protein coding RNA 92                                                | Homo sapiens non-protein coding RNA 92 (NCRNA00092), non-coding RNA [NR_024129]                                                             | 2.16072 | down | 5.00630  | down | 94.03716    | 210.39278    | 35.62950    | 157.28668    | Detected    | Detected    | Detected    | Detected    |
| 6652 | A_23_P73429   | HCLS1      | Hs.14601  | hematopoietic cell-specific Lyn substrate 1                              | Homo sapiens hematopoietic cell-specific Lyn substrate 1 (HCLS1), mRNA [NM_005335]                                                          | 2.16062 | down | 2.14163  | down | 374.30164   | 837.40216    | 378.12924   | 714.08590    | Detected    | Detected    | Detected    | Detected    |
| 6653 | A_33_P3392177 | CLIC5      | Hs.485489 | chloride intracellular channel 5                                         | Homo sapiens chloride intracellular channel 5 (CLIC5), transcript variant 1, mRNA [NM_001114086]                                            | 2.16036 | down | 2.09268  | down | 11157.53100 | 24959.01000  | 11969.24700 | 22086.87300  | Detected    | Detected    | Detected    | Detected    |
| 6654 | A_24_P141688  | PCBP2      | Hs.546271 | poly(rC) binding protein 2                                               | Homo sapiens poly(rC) binding protein 2 (PCBP2), transcript variant 1, mRNA [NM_005016]                                                     | 2.16034 | down | 2.21126  | down | 829.47760   | 1855.49790   | 760.82690   | 1483.51060   | Detected    | Detected    | Detected    | Detected    |
| 6655 | A_33_P3356517 |            |           |                                                                          |                                                                                                                                             | 2.16030 | down | 2.65623  | down | 151.25375   | 338.34055    | 115.90701   | 271.48150    | Detected    | Detected    | Detected    | Detected    |
| 6656 | A_33_P3304097 |            |           |                                                                          |                                                                                                                                             | 2.16001 | down | 1.49229  | down | 57.15156    | 127.82531    | 18.15627    | 23.89157     | Detected    | Detected    | Detected    | Detected    |
| 6657 | A_23_P77073   | SPPL2A     | Hs.401537 | signal peptide peptidase-like 2A                                         | Homo sapiens signal peptide peptidase-like 2A (SPPL2A), mRNA [NM_032802]                                                                    | 2.15961 | down | 2.21368  | down | 2504.74370  | 5601.07670   | 1908.45760  | 3725.30540   | Detected    | Detected    | Detected    | Detected    |
| 6658 | A_23_P145965  | TPST1      | Hs.720092 | tyrosylprotein sulfotransferase 1                                        | Homo sapiens tyrosylprotein sulfotransferase 1 (TPST1), mRNA [NM_003596]                                                                    | 2.15958 | down | 2.07710  | down | 5381.19600  | 12033.18800  | 4498.23200  | 8238.80200   | Detected    | Detected    | Detected    | Detected    |
| 6659 | A_33_P3331853 | PDE1C      | Hs.655694 | phosphodiesterase 1C, calmodulin-dependent 70kDa                         | Homo sapiens phosphodiesterase 1C, calmodulin-dependent 70kDa (PDE1C), mRNA [NM_005020]                                                     | 2.15957 | down | 33.37086 | down | 3.32886     | 7.44381      | 2.52417     | 74.27663     | Compromised | Compromised | Compromised | Detected    |
| 6660 | A_24_P272352  | LOC284441  |           | actin-related protein 2 pseudogene                                       | Homo sapiens actin-related protein 2 pseudogene (LOC284441), non-coding RNA [NR_003128]                                                     | 2.15923 | down | 2.17728  | down | 751.55840   | 1680.32910   | 566.60300   | 1087.82420   | Detected    | Detected    | Detected    | Detected    |
| 6661 | A_33_P3273364 | YIPF2      | Hs.720136 | Yip1 domain family, member 2                                             | Homo sapiens Yip1 domain family, member 2 (YIPF2), mRNA [NM_024029]                                                                         | 2.15903 | down | 2.31023  | down | 2246.61820  | 5022.52150   | 1760.52000  | 3586.41970   | Detected    | Detected    | Detected    | Detected    |
| 6662 | A_33_P3262625 | CECR7      |           | cat eye syndrome chromosome region, candidate 7 (non-protein coding)     | Homo sapiens cat eye syndrome chromosome region, candidate 7 (non-protein coding) (CECR7), non-coding RNA [NR_015352]                       | 2.15894 | down | 2.44786  | down | 95.35472    | 213.16524    | 52.40698    | 113.12040    | Detected    | Detected    | Detected    | Detected    |
| 6663 | A_33_P3293254 | GPSM1      | Hs.239370 | G-protein signaling modulator 1 (AGS3-like, C. elegans)                  | Homo sapiens G-protein signaling modulator 1 (AGS3-like, C. elegans) (GPSM1), transcript variant 2, mRNA [NM_015597]                        | 2.15880 | down | 1.85692  | down | 24.38764    | 54.51491     | 36.98367    | 60.55776     | Detected    | Detected    | Detected    | Detected    |
| 6664 | A_24_P377144  | ANTXR2     | Hs.162963 | anthrax toxin receptor 2                                                 | Homo sapiens anthrax toxin receptor 2 (ANTXR2), transcript variant 1, mRNA [NM_058172]                                                      | 2.15854 | down | 2.00106  | down | 209.28621   | 467.77063    | 179.63362   | 316.96650    | Detected    | Detected    | Detected    | Detected    |
| 6665 | A_23_P202448  | CXCL12     | Hs.522891 | chemokine (C-X-C motif) ligand 12 (stromal cell-derived factor 1)        | Homo sapiens chemokine (C-X-C motif) ligand 12 (stromal cell-derived factor 1) (CXCL12), transcript variant 1, mRNA [NM_139168]             | 2.15847 | down | 2.13964  | down | 8794.89400  | 19656.62100  | 7958.87740  | 15016.15100  | Detected    | Detected    | Detected    | Detected    |
| 6666 | A_33_P3209476 | CCM2       | Hs.148272 | cerebral cavernous malformation 2                                        | Homo sapiens cerebral cavernous malformation 2 (CCM2), transcript variant 1, mRNA [NM_001029835]                                            | 2.15787 | down | 1.70080  | down | 4053.04600  | 9056.06400   | 821.68396   | 1232.32340   | Detected    | Detected    | Detected    | Detected    |
| 6667 | A_33_P3424462 | CNST       | Hs.368353 | consortin, connexin sorting protein                                      | Homo sapiens consortin, connexin sorting protein (CNST), transcript variant 2, mRNA [NM_001139459]                                          | 2.15493 | down | 2.31489  | down | 196.21461   | 437.82250    | 104.84539   | 214.01508    | Detected    | Detected    | Detected    | Detected    |
| 6668 | A_24_P346587  | MTFR1      | Hs.584788 | mitochondrial fission regulator 1                                        | Homo sapiens mitochondrial fission regulator 1 (MTFR1), nuclear gene encoding mitochondrial protein, transcript variant 1, mRNA [NM_014637] | 2.15468 | down | 2.03081  | down | 866.11350   | 1932.37280   | 793.81550   | 1421.52310   | Detected    | Detected    | Detected    | Detected    |
| 6669 | A_23_P216501  | TPM2       | Hs.300772 | tropomyosin 2 (beta)                                                     | Homo sapiens tropomyosin 2 (beta) (TPM2), transcript variant 2, mRNA [NM_213674]                                                            | 2.15459 | down | 2.04676  | down | 91498.38000 | 204131.75000 | 97944.29000 | 176771.50000 | Detected    | Detected    | Detected    | Detected    |
| 6670 | A_33_P3225096 | MTMR10     | Hs.30141  | myotubularin related protein 10                                          | Homo sapiens myotubularin related protein 10 (MTMR10), mRNA [NM_017782]                                                                     | 2.15329 | down | 1.98841  | down | 164.98499   | 367.85712    | 173.26881   | 303.80237    | Detected    | Detected    | Detected    | Detected    |



|      |               |              |           |                                                                                                     |                                                                                                                                               |         |      |         |      |             |             |             |             |             |          |             |             |
|------|---------------|--------------|-----------|-----------------------------------------------------------------------------------------------------|-----------------------------------------------------------------------------------------------------------------------------------------------|---------|------|---------|------|-------------|-------------|-------------|-------------|-------------|----------|-------------|-------------|
| 6671 | A_23_P422724  | PPIC         | Hs.110364 | peptidylprolyl isomerase C (cyclophilin C)                                                          | Homo sapiens peptidylprolyl isomerase C (cyclophilin C) (PPIC), mRNA [NM_000943]                                                              | 2.15203 | down | 1.91254 | down | 2731.36650  | 6086.42240  | 2385.22500  | 4022.58060  | Detected    | Detected | Detected    | Detected    |
| 6672 | A_23_P136196  | TBC1D19      | Hs.479403 | TBC1 domain family, member 19                                                                       | Homo sapiens TBC1 domain family, member 19 (TBC1D19), mRNA [NM_018317]                                                                        | 2.15197 | down | 1.77951 | down | 289.01990   | 644.01685   | 187.26938   | 293.85492   | Detected    | Detected | Detected    | Detected    |
| 6673 | A_23_P8640    | GPGR         | Hs.20961  | G protein-coupled estrogen receptor 1                                                               | Homo sapiens G protein-coupled estrogen receptor 1 (GPGR), transcript variant 3, mRNA [NM_001039966]                                          | 2.15190 | down | 2.42399 | down | 1097.87290  | 2446.29050  | 1032.70390  | 2207.35620  | Detected    | Detected | Detected    | Detected    |
| 6674 | A_23_P370097  | ALS2CR4      | Hs.12319  | amyotrophic lateral sclerosis 2 (juvenile) chromosome region, candidate 4                           | Homo sapiens amyotrophic lateral sclerosis 2 (juvenile) chromosome region, candidate 4 (ALS2CR4), transcript variant 1, mRNA [NM_001044385]   | 2.15174 | down | 1.96188 | down | 1122.66320  | 2501.33840  | 1174.52500  | 2031.89250  | Detected    | Detected | Detected    | Detected    |
| 6675 | A_23_P313961  | NME6         | Hs.465558 | non-metastatic cells 6, protein expressed in (nucleoside-diphosphate kinase)                        | Homo sapiens non-metastatic cells 6, protein expressed in (nucleoside-diphosphate kinase) (NME6), mRNA [NM_005793]                            | 2.14994 | down | 2.33173 | down | 353.69757   | 767.39360   | 411.48993   | 846.06384   | Detected    | Detected | Detected    | Detected    |
| 6676 | A_32_P203786  | FAM7A1       | Hs.574255 | family with sequence similarity 7, member A1                                                        | Homo sapiens family with sequence similarity 7, member A1 (FAM7A1), non-coding RNA [NR_026858]                                                | 2.14975 | down | 2.10108 | down | 10.91427    | 24.29497    | 9.81501     | 18.18439    | Compromised | Detected | Compromised | Detected    |
| 6677 | A_23_P141248  | SRR          | Hs.461954 | serine racemase                                                                                     | Homo sapiens serine racemase (SRR), mRNA [NM_021947]                                                                                          | 2.14909 | down | 2.01680 | down | 253.25903   | 563.57654   | 218.80774   | 389.12677   | Detected    | Detected | Detected    | Detected    |
| 6678 | A_32_P110390  | TMEM171      | Hs.162246 | transmembrane protein 171                                                                           | Homo sapiens transmembrane protein 171 (TMEM171), transcript variant 1, mRNA [NM_173490]                                                      | 2.14879 | down | 1.85650 | down | 420.62940   | 935.89200   | 553.44100   | 906.00653   | Detected    | Detected | Detected    | Detected    |
| 6679 | A_33_P3707547 | LOC541467    | Hs.612192 | hypothetical LOC541467                                                                              | Homo sapiens hypothetical LOC541467, mRNA (cDNA clone IMAGE4830703), partial cds [BC045815]                                                   | 2.14858 | down | 2.21128 | down | 22.30807    | 49.63033    | 18.89605    | 36.84513    | Detected    | Detected | Detected    | Detected    |
| 6680 | A_33_P3269203 | SERPINH1     | Hs.596449 | serpin peptidase inhibitor, clade H (heat shock protein 47), member 1, (collagen binding protein 1) | Homo sapiens serpin peptidase inhibitor, clade H (heat shock protein 47), member 1, (collagen binding protein 1) (SERPINH1), mRNA [NM_001235] | 2.14846 | down | 2.32924 | down | 29063.24400 | 64655.47700 | 23792.29900 | 48866.95000 | Detected    | Detected | Detected    | Detected    |
| 6681 | A_33_P3229156 | SLC17A9      | Hs.512686 | solute carrier family 17, member 9                                                                  | Homo sapiens solute carrier family 17, member 9 (SLC17A9), mRNA [NM_022082]                                                                   | 2.14721 | down | 2.38270 | down | 2997.91280  | 6665.39450  | 1711.73800  | 3596.43820  | Detected    | Detected | Detected    | Detected    |
| 6682 | A_23_P155376  | CRELD1       | Hs.9383   | cysteine-rich with EGF-like domains 1                                                               | Homo sapiens cysteine-rich with EGF-like domains 1 (CRELD1), transcript variant 2, mRNA [NM_015513]                                           | 2.14687 | down | 2.15217 | down | 541.73760   | 1204.28170  | 520.61176   | 987.99800   | Detected    | Detected | Detected    | Detected    |
| 6683 | A_33_P3370132 | TNPO3        | Hs.193613 | transportin 3                                                                                       | Homo sapiens transportin 3 (TNPO3), mRNA [NM_012470]                                                                                          | 2.14661 | down | 2.26146 | down | 1237.43590  | 2750.48880  | 1181.17420  | 2355.41580  | Detected    | Detected | Detected    | Detected    |
| 6684 | A_33_P3414949 | LOC100129532 |           | hypothetical LOC100129532                                                                           | PXMP2 protein [Source:UniProtKB/TrEMBL;Acc:Q96GB0] [ENST00000439331]                                                                          | 2.14635 | down | 3.08436 | down | 7.35364     | 16.34317    | 5.84463     | 15.89599    | Compromised | Detected | Compromised | Detected    |
| 6685 | A_33_P3398513 | hCG_1645220  | Hs.602756 | hCG1645220                                                                                          | Homo sapiens hCG1645220 (LOC728819), mRNA [NM_001101330]                                                                                      | 2.14634 | down | 2.26639 | down | 47.31722    | 105.15989   | 28.41791    | 56.79264    | Detected    | Detected | Detected    | Detected    |
| 6686 | A_33_P3271166 | OR6C74       | Hs.554556 | olfactory receptor, family 6, subfamily C, member 74                                                | Homo sapiens olfactory receptor, family 6, subfamily C, member 74 (OR6C74), mRNA [NM_001005490]                                               | 2.14623 | down | 2.31595 | down | 60.71483    | 134.92890   | 17.05463    | 34.82874    | Detected    | Detected | Detected    | Detected    |
| 6687 | A_33_P3209025 | ZNF623       | Hs.694018 | zinc finger protein 623                                                                             | Homo sapiens zinc finger protein 623 (ZNF623), transcript variant 2, mRNA [NM_001082480]                                                      | 2.14503 | down | 1.83762 | down | 11.65457    | 25.88588    | 12.61016    | 20.43342    | Detected    | Detected | Detected    | Detected    |
| 6688 | A_32_P720220  | C12orf36     | Hs.448717 | chromosome 12 open reading frame 36                                                                 | Homo sapiens chromosome 12 open reading frame 36 (C12orf36), mRNA [NM_162558]                                                                 | 2.14487 | down | 1.33590 | down | 29.12286    | 64.67966    | 6.22493     | 7.33287     | Detected    | Detected | Compromised | Compromised |
| 6689 | A_33_P3396692 | SSR1         | Hs.114033 | signal sequence receptor, alpha                                                                     | Homo sapiens signal sequence receptor, alpha (SSR1), mRNA [NM_003144]                                                                         | 2.14466 | down | 1.99471 | down | 2687.99880  | 5969.27400  | 2036.95310  | 3582.82980  | Detected    | Detected | Detected    | Detected    |
| 6690 | A_23_P89422   | ABCA10       | Hs.25377  | ATP-binding cassette, sub-family A (ABC1), member 10                                                | Homo sapiens ATP-binding cassette, sub-family A (ABC1), member 10 (ABCA10), mRNA [NM_080282]                                                  | 2.14466 | down | 1.86908 | down | 20.97563    | 46.58079    | 10.63816    | 17.53319    | Detected    | Detected | Compromised | Detected    |
| 6691 | A_33_P3229335 | HIST3H2BB    | Hs.376691 | histone cluster 3, H2bb                                                                             | Homo sapiens histone cluster 3, H2bb (HIST3H2BB), mRNA [NM_175055]                                                                            | 2.14349 | down | 1.13684 | down | 25.78246    | 57.22399    | 26.66236    | 26.72782    | Detected    | Detected | Detected    | Detected    |
| 6692 | A_23_P105730  | MDM1         | Hs.655702 | Mdm1 nuclear protein homolog (mouse)                                                                | Homo sapiens Mdm1 nuclear protein homolog (mouse) (MDM1), transcript variant 2, mRNA [NM_020128]                                              | 2.14295 | down | 1.91986 | down | 7.61416     | 16.89531    | 8.14518     | 13.78905    | Compromised | Detected | Compromised | Detected    |
| 6693 | A_33_P3352522 | LOC100128430 | Hs.720848 | hypothetical LOC100128430                                                                           | PREDICTED: Homo sapiens similar to hCG2012058 (LOC100128430), mRNA [XM_002347413]                                                             | 2.14287 | down | 2.66869 | down | 25.42752    | 56.42007    | 13.54976    | 31.88561    | Detected    | Detected | Compromised | Detected    |
| 6694 | A_33_P3302423 | TNRC6C       | Hs.569831 | trinucleotide repeat containing 6C                                                                  | Homo sapiens trinucleotide repeat containing 6C (TNRC6C), transcript variant 1, mRNA [NM_001142840]                                           | 2.14209 | down | 2.27787 | down | 418.43850   | 928.11700   | 324.55637   | 651.90393   | Detected    | Detected | Detected    | Detected    |
| 6695 | A_33_P3280927 | SNHG7        |           | small nucleolar RNA host gene 7 (non-protein coding)                                                | Homo sapiens small nucleolar RNA host gene 7 (non-protein coding) (SNHG7), transcript variant 2, non-coding RNA [NR_024542]                   | 2.14146 | down | 2.02560 | down | 2252.31760  | 4994.27100  | 1330.15040  | 2375.65570  | Detected    | Detected | Detected    | Detected    |
| 6696 | A_33_P3398107 | SYS1         | Hs.655055 | SYS1 Golgi-localized integral membrane protein homolog (S. cerevisiae)                              | Homo sapiens SYS1 Golgi-localized integral membrane protein homolog (S. cerevisiae) (SYS1), transcript variant 1, mRNA [NM_033542]            | 2.13967 | down | 2.19939 | down | 214.86708   | 476.04610   | 233.44078   | 452.73474   | Detected    | Detected | Detected    | Detected    |
| 6697 | A_24_P154948  | GARS         | Hs.404321 | glycyl-tRNA synthetase                                                                              | Homo sapiens glycyl-tRNA synthetase (GARS), mRNA [NM_002047]                                                                                  | 2.13932 | down | 2.07495 | down | 4937.86430  | 10938.27100 | 2528.00460  | 4625.42800  | Detected    | Detected | Detected    | Detected    |
| 6698 | A_23_P349928  | SP100        | Hs.369056 | SP100 nuclear antigen                                                                               | Homo sapiens SP100 nuclear antigen (SP100), transcript variant 2, mRNA [NM_003113]                                                            | 2.13917 | down | 2.02498 | down | 39478.00800 | 87444.76000 | 25006.67200 | 44652.16800 | Detected    | Detected | Detected    | Detected    |
| 6699 | A_23_P50591   | KCNK6        | Hs.240395 | potassium channel, subfamily K, member 6                                                            | Homo sapiens potassium channel, subfamily K, member 6 (KCNK6), mRNA [NM_004823]                                                               | 2.13908 | down | 2.38018 | down | 181.01460   | 400.93497   | 142.87407   | 299.86700   | Detected    | Detected | Detected    | Detected    |

|      |               |            |           |                                                               |                                                                                                                                                                                |         |      |         |      |             |              |             |              |          |          |          |          |
|------|---------------|------------|-----------|---------------------------------------------------------------|--------------------------------------------------------------------------------------------------------------------------------------------------------------------------------|---------|------|---------|------|-------------|--------------|-------------|--------------|----------|----------|----------|----------|
| 6700 | A_33_P3225477 | tcag7.1227 | Hs.650534 | hypothetical protein LOC731075                                | PREDICTED: Homo sapiens hypothetical protein LOC731075 (LOC731075), mRNA [XM_001714401]                                                                                        | 2.13865 | down | 1.60256 | down | 53.81470    | 119.17197    | 24.40200    | 34.48311     | Detected | Detected | Detected | Detected |
| 6701 | A_23_P34126   | BGN        | Hs.821    | biglycan                                                      | Homo sapiens biglycan (BGN), mRNA [NM_001711]                                                                                                                                  | 2.13813 | down | 2.55975 | down | 383.01090   | 847.96470    | 440.74258   | 994.82680    | Detected | Detected | Detected | Detected |
| 6702 | A_23_P784     | LZIC       | Hs.327252 | leucine zipper and CTNBP1 domain containing                   | Homo sapiens leucine zipper and CTNBP1 domain containing (LZIC), mRNA [NM_032368]                                                                                              | 2.13796 | down | 2.03667 | down | 1426.21410  | 3157.31640   | 1448.92740  | 2602.15900   | Detected | Detected | Detected | Detected |
| 6703 | A_23_P359588  | PCDHGB4    | Hs.368160 | protocadherin gamma subfamily B, 4                            | Homo sapiens protocadherin gamma subfamily B, 4 (PCDHGB4), transcript variant 2, mRNA [NM_032098]                                                                              | 2.13796 | down | 2.32746 | down | 76.29316    | 168.89574    | 70.24512    | 144.16612    | Detected | Detected | Detected | Detected |
| 6704 | A_23_P164284  | CLDN7      | Hs.513915 | claudin 7                                                     | Homo sapiens claudin 7 (CLDN7), mRNA [NM_001307]                                                                                                                               | 2.13744 | down | 2.20138 | down | 615.63446   | 1362.54350   | 560.19880   | 1087.43530   | Detected | Detected | Detected | Detected |
| 6705 | A_33_P3337019 | LOC728975  | Hs.647238 | hypothetical protein LOC728975                                | PREDICTED: Homo sapiens hypothetical protein LOC728975 (LOC728975), miscRNA [XR_042005]                                                                                        | 2.13733 | down | 1.93456 | down | 365.74182   | 809.42960    | 255.08148   | 435.13834    | Detected | Detected | Detected | Detected |
| 6706 | A_33_P3240258 | RPN2       | Hs.370895 | ribophorin II                                                 | Homo sapiens ribophorin II (RPN2), transcript variant 1, mRNA [NM_002951]                                                                                                      | 2.13731 | down | 2.22252 | down | 10777.37800 | 23851.43000  | 10439.94700 | 20460.20300  | Detected | Detected | Detected | Detected |
| 6707 | A_23_P40354   | MAPRE1     | Hs.472437 | microtubule-associated protein, RP/EB family, member 1        | Homo sapiens microtubule-associated protein, RP/EB family, member 1 (MAPRE1), mRNA [NM_012325]                                                                                 | 2.13617 | down | 2.20814 | down | 1271.74990  | 2813.00660   | 1364.57420  | 2656.99150   | Detected | Detected | Detected | Detected |
| 6708 | A_23_P120566  | RRBP1      | Hs.472213 | ribosome binding protein 1 homolog 180kDa (dog)               | Homo sapiens ribosome binding protein 1 homolog 180kDa (dog) (RRBP1), transcript variant 1, mRNA [NM_001042576]                                                                | 2.13574 | down | 2.36464 | down | 4643.10700  | 10268.12300  | 3533.72240  | 7368.22900   | Detected | Detected | Detected | Detected |
| 6709 | A_33_P3361257 | NOP16      | Hs.696283 | NOP16 nucleolar protein homolog (yeast)                       | Homo sapiens NOP16 nucleolar protein homolog (yeast) (NOP16), mRNA [NM_016391]                                                                                                 | 2.13551 | down | 1.98444 | down | 5930.65430  | 13114.06400  | 6031.30000  | 10553.95900  | Detected | Detected | Detected | Detected |
| 6710 | A_33_P3215028 | C6orf89    | Hs.433381 | chromosome 6 open reading frame 89                            | Homo sapiens chromosome 6 open reading frame 89 (C6orf89), mRNA [NM_152734]                                                                                                    | 2.13471 | down | 2.10900 | down | 2729.63920  | 6033.61300   | 1997.42860  | 3714.60620   | Detected | Detected | Detected | Detected |
| 6711 | A_23_P105862  | FRY        | Hs.507669 | furry homolog (Drosophila)                                    | Homo sapiens furry homolog (Drosophila) (FRY), mRNA [NM_023037]                                                                                                                | 2.13453 | down | 2.02286 | down | 101.94138   | 225.31250    | 67.99375    | 121.28308    | Detected | Detected | Detected | Detected |
| 6712 | A_32_P16489   | MRPL35     | Hs.433439 | mitochondrial ribosomal protein L35                           | Homo sapiens mitochondrial ribosomal protein L35 (MRPL35), nuclear gene encoding mitochondrial protein, transcript variant 2, mRNA [NM_145644]                                 | 2.13434 | down | 1.87834 | down | 869.58830   | 1921.80860   | 407.18900   | 674.42816    | Detected | Detected | Detected | Detected |
| 6713 | A_23_P66694   | EVI2B      | Hs.5509   | ecotropic viral integration site 2B                           | Homo sapiens ecotropic viral integration site 2B (EVI2B), mRNA [NM_006495]                                                                                                     | 2.13365 | down | 2.13008 | down | 22.86298    | 50.51148     | 15.00267    | 28.17931     | Detected | Detected | Detected | Detected |
| 6714 | A_24_P43092   | SEPT2      | Hs.712994 | septin 2                                                      | Homo sapiens septin 2 (SEPT2), transcript variant 1, mRNA [NM_001008491]                                                                                                       | 2.13313 | down | 2.21955 | down | 230.83337   | 509.85736    | 197.36574   | 386.27970    | Detected | Detected | Detected | Detected |
| 6715 | A_23_P141894  | PVR        | Hs.171844 | poliovirus receptor                                           | Homo sapiens poliovirus receptor (PVR), transcript variant 1, mRNA [NM_006505]                                                                                                 | 2.13302 | down | 2.57983 | down | 97.11194    | 214.48697    | 77.75445    | 176.88145    | Detected | Detected | Detected | Detected |
| 6716 | A_23_P400465  | GTF3C6     | Hs.418520 | general transcription factor IIIc, polypeptide 6, alpha 35kDa | Homo sapiens general transcription factor IIIc, polypeptide 6, alpha 35kDa (GTF3C6), mRNA [NM_138408]                                                                          | 2.13274 | down | 2.01200 | down | 20128.71500 | 44451.46500  | 17057.24400 | 30262.31600  | Detected | Detected | Detected | Detected |
| 6717 | A_32_P219116  | CENPJ      | Hs.513379 | centromere protein J                                          | Homo sapiens centromere protein J (CENPJ), mRNA [NM_018451]                                                                                                                    | 2.13060 | down | 2.08555 | down | 1045.16380  | 2305.78980   | 967.41986   | 1779.10050   | Detected | Detected | Detected | Detected |
| 6718 | A_23_P17769   | DDT        | Hs.656723 | D-dopachrome tautomerase                                      | Homo sapiens D-dopachrome tautomerase (DDT), transcript variant 1, mRNA [NM_001355]                                                                                            | 2.12970 | down | 2.18451 | down | 4815.29000  | 10618.73800  | 4886.30800  | 9605.03500   | Detected | Detected | Detected | Detected |
| 6719 | A_33_P3270599 | TPM2       | Hs.300772 | tropomyosin 2 (beta)                                          | Homo sapiens tropomyosin 2 (beta) (TPM2), transcript variant 2, mRNA [NM_213674]                                                                                               | 2.12959 | down | 2.17659 | down | 69898.86000 | 154134.22000 | 63249.09400 | 121393.99000 | Detected | Detected | Detected | Detected |
| 6720 | A_33_P3389728 | NRSA2      | Hs.33446  | nuclear receptor subfamily 5, group A, member 2               | Homo sapiens nuclear receptor subfamily 5, group A, member 2 (NRSA2), transcript variant 1, mRNA [NM_205860]                                                                   | 2.12928 | down | 2.45468 | down | 298.80205   | 658.35345    | 206.43166   | 446.82407    | Detected | Detected | Detected | Detected |
| 6721 | A_23_P101742  | MRPL54     | Hs.356578 | mitochondrial ribosomal protein L54                           | Homo sapiens mitochondrial ribosomal protein L54 (MRPL54), nuclear gene encoding mitochondrial protein, mRNA [NM_172251]                                                       | 2.12902 | down | 2.12374 | down | 1556.05960  | 3430.35820   | 1834.89180  | 3436.18630   | Detected | Detected | Detected | Detected |
| 6722 | A_33_P3363310 |            |           |                                                               | Keratin-associated protein 5-10 (Keratin-associated protein 5.10)(Ultrahigh sulfur keratin-associated protein 5.10) [Source:UniProtKB/Swiss-Prot;Acc:Q6L8G5] [ENST00000376536] | 2.12848 | down | 1.73219 | down | 1446.94320  | 3189.00000   | 270.05820   | 412.49542    | Detected | Detected | Detected | Detected |
| 6723 | A_33_P3397298 |            |           |                                                               |                                                                                                                                                                                | 2.12732 | down | 2.90458 | down | 429.15546   | 945.32240    | 350.95795   | 898.88434    | Detected | Detected | Detected | Detected |
| 6724 | A_23_P365817  | PPP1R14B   | Hs.523760 | protein phosphatase 1, regulatory (inhibitor) subunit 14B     | Homo sapiens protein phosphatase 1, regulatory (inhibitor) subunit 14B (PPP1R14B), mRNA [NM_138689]                                                                            | 2.12663 | down | 2.05087 | down | 23511.65600 | 51773.67600  | 11957.66100 | 21624.71500  | Detected | Detected | Detected | Detected |
| 6725 | A_32_P486693  | NRIP3      | Hs.523467 | nuclear receptor interacting protein 3                        | Homo sapiens nuclear receptor interacting protein 3 (NRIP3), mRNA [NM_020645]                                                                                                  | 2.12619 | down | 2.40132 | down | 59.15313    | 130.23070    | 70.11028    | 148.45575    | Detected | Detected | Detected | Detected |
| 6726 | A_32_P182511  | KIAA1609   | Hs.288274 | KIAA1609                                                      | Homo sapiens KIAA1609 (KIAA1609), mRNA [NM_020947]                                                                                                                             | 2.12566 | down | 2.29739 | down | 187.88048   | 413.53125    | 180.67159   | 366.00787    | Detected | Detected | Detected | Detected |
| 6727 | A_23_P71241   | SEC61G     | Hs.488282 | Sec61 gamma subunit                                           | Homo sapiens Sec61 gamma subunit (SEC61G), transcript variant 1, mRNA [NM_014302]                                                                                              | 2.12554 | down | 1.88909 | down | 9277.52600  | 20418.97900  | 7761.07100  | 12928.22500  | Detected | Detected | Detected | Detected |
| 6728 | A_23_P201386  | DDAH1      | Hs.719968 | dimethylarginine dimethylaminohydrolase 1                     | Homo sapiens dimethylarginine dimethylaminohydrolase 1 (DDAH1), transcript variant 1, mRNA [NM_012137]                                                                         | 2.12513 | down | 2.13246 | down | 7626.14400  | 16781.25600  | 6153.71200  | 11571.33100  | Detected | Detected | Detected | Detected |
| 6729 | A_23_P96833   | SLAMF9     | Hs.661712 | SLAM family member 9                                          | Homo sapiens SLAM family member 9 (SLAMF9), transcript variant 1, mRNA [NM_033438]                                                                                             | 2.12457 | down | 2.54721 | down | 439.70224   | 967.30347    | 492.34583   | 1105.86170   | Detected | Detected | Detected | Detected |

|      |               |          |           |                                                                                          |                                                                                                                                                        |         |      |         |      |             |             |             |             |             |          |             |             |
|------|---------------|----------|-----------|------------------------------------------------------------------------------------------|--------------------------------------------------------------------------------------------------------------------------------------------------------|---------|------|---------|------|-------------|-------------|-------------|-------------|-------------|----------|-------------|-------------|
| 6730 | A_33_P3418597 | GAS2L1   | Hs.322852 | growth arrest-specific 2 like 1                                                          | Homo sapiens growth arrest-specific 2 like 1 (GAS2L1), transcript variant 3, mRNA [NM_152237]                                                          | 2.12387 | down | 2.61805 | down | 1437.30160  | 3160.88100  | 1594.03940  | 3679.95000  | Detected    | Detected | Detected    | Detected    |
| 6731 | A_33_P3342992 | UBE2QP2  | Hs.641964 | ubiquitin-conjugating enzyme E2Q family pseudogene 2                                     | Homo sapiens ubiquitin-conjugating enzyme E2Q family pseudogene 2 (UBE2QP2), non-coding RNA [NR_004847]                                                | 2.12383 | down | 1.41850 | down | 105.66731   | 232.37761   | 78.91713    | 98.71082    | Detected    | Detected | Detected    | Detected    |
| 6732 | A_33_P3539223 | C9orf100 | Hs.534579 | chromosome 9 open reading frame 100                                                      | Homo sapiens chromosome 9 open reading frame 100 (C9orf100), mRNA [NM_032818]                                                                          | 2.12339 | down | 2.59388 | down | 40.66789    | 89.41570    | 34.95396    | 79.94890    | Detected    | Detected | Detected    | Detected    |
| 6733 | A_23_P98631   | HPS5     | Hs.437599 | Hermansky-Pudlak syndrome 5                                                              | Homo sapiens Hermansky-Pudlak syndrome 5 (HPS5), transcript variant 1, mRNA [NM_181507]                                                                | 2.12331 | down | 2.23057 | down | 454.27560   | 998.76910   | 405.53590   | 797.64690   | Detected    | Detected | Detected    | Detected    |
| 6734 | A_23_P147729  | SLC35E3  | Hs.506011 | solute carrier family 35, member E3                                                      | Homo sapiens solute carrier family 35, member E3 (SLC35E3), mRNA [NM_018656]                                                                           | 2.12305 | down | 1.95824 | down | 208.58810   | 458.54620   | 161.93335   | 279.62006   | Detected    | Detected | Detected    | Detected    |
| 6735 | A_24_P178423  | HNRNPC   | Hs.508848 | heterogeneous nuclear ribonucleoprotein C (C1/C2)                                        | Homo sapiens heterogeneous nuclear ribonucleoprotein C (C1/C2) (HNRNPC), transcript variant 1, mRNA [NM_031314]                                        | 2.12265 | down | 1.99525 | down | 3942.86940  | 8666.10600  | 3292.62480  | 5793.02830  | Detected    | Detected | Detected    | Detected    |
| 6736 | A_23_P5601    | DOK1     | Hs.103854 | docking protein 1, 62kDa (downstream of tyrosine kinase 1)                               | Homo sapiens docking protein 1, 62kDa (downstream of tyrosine kinase 1) (DOK1), mRNA [NM_001381]                                                       | 2.12206 | down | 2.22803 | down | 5768.48050  | 12675.12300 | 4269.10000  | 8387.31700  | Detected    | Detected | Detected    | Detected    |
| 6737 | A_24_P237613  | USP12    | Hs.42400  | ubiquitin specific peptidase 12                                                          | Homo sapiens ubiquitin specific peptidase 12 (USP12), mRNA [NM_182488]                                                                                 | 2.12156 | down | 1.92265 | down | 80.92330    | 177.77174   | 93.29781    | 158.17502   | Detected    | Detected | Detected    | Detected    |
| 6738 | A_23_P325726  | ACOT11   | Hs.234786 | acyl-CoA thioesterase 11                                                                 | Homo sapiens acyl-CoA thioesterase 11 (ACOT11), transcript variant 1, mRNA [NM_015547]                                                                 | 2.12125 | down | 2.39139 | down | 27.23157    | 59.81334    | 17.77024    | 37.47220    | Detected    | Detected | Detected    | Detected    |
| 6739 | A_33_P3225690 | ZNF516   | Hs.709890 | zinc finger protein 516                                                                  | Homo sapiens zinc finger protein 516 (ZNF516), mRNA [NM_014643]                                                                                        | 2.12124 | down | 2.16493 | down | 897.14800   | 1970.54610  | 671.33636   | 1281.59000  | Detected    | Detected | Detected    | Detected    |
| 6740 | A_23_P819     | ISG15    | Hs.458485 | ISG15 ubiquitin-like modifier                                                            | Homo sapiens ISG15 ubiquitin-like modifier (ISG15), mRNA [NM_005101]                                                                                   | 2.12097 | down | 1.61635 | down | 9293.83500  | 20410.92400 | 6646.26900  | 9472.83400  | Detected    | Detected | Detected    | Detected    |
| 6741 | A_23_P215566  | AHR      | Hs.171189 | aryl hydrocarbon receptor                                                                | Homo sapiens aryl hydrocarbon receptor (AHR), mRNA [NM_001621]                                                                                         | 2.12014 | down | 2.10246 | down | 2162.68300  | 4747.77400  | 1764.58170  | 3271.41110  | Detected    | Detected | Detected    | Detected    |
| 6742 | A_33_P3405068 | NAV1     | Hs.585374 | neuron navigator 1                                                                       | Homo sapiens neuron navigator 1 (NAV1), mRNA [NM_020443]                                                                                               | 2.11956 | down | 1.92521 | down | 707.75150   | 1553.31870  | 504.97500   | 857.26135   | Detected    | Detected | Detected    | Detected    |
| 6743 | A_23_P110253  | KIT      | Hs.479754 | v-kit Hardy-Zuckerman 4 feline sarcoma viral oncogene homolog                            | Homo sapiens v-kit Hardy-Zuckerman 4 feline sarcoma viral oncogene homolog (KIT), transcript variant 1, mRNA [NM_000222]                               | 2.11932 | down | 1.97216 | down | 26.55960    | 58.28436    | 17.32201    | 30.12346    | Detected    | Detected | Detected    | Detected    |
| 6744 | A_24_P131222  | ATP13A2  | Hs.128866 | ATPase type 13A2                                                                         | Homo sapiens ATPase type 13A2 (ATP13A2), transcript variant 1, mRNA [NM_022089]                                                                        | 2.11893 | down | 2.57305 | down | 207.87927   | 456.09995   | 188.49626   | 427.67830   | Detected    | Detected | Detected    | Detected    |
| 6745 | A_33_P3262452 | PEX26    | Hs.517400 | peroxisomal biogenesis factor 26                                                         | Homo sapiens peroxisomal biogenesis factor 26 (PEX26), transcript variant 2, mRNA [NM_001127649]                                                       | 2.11829 | down | 2.53371 | down | 205.72151   | 451.23068   | 150.73582   | 336.77414   | Detected    | Detected | Detected    | Detected    |
| 6746 | A_23_P145874  | SAMD9L   | Hs.489118 | sterile alpha motif domain containing 9-like                                             | Homo sapiens sterile alpha motif domain containing 9-like (SAMD9L), mRNA [NM_152703]                                                                   | 2.11813 | down | 2.28751 | down | 180.16281   | 395.13965   | 130.19489   | 262.61650   | Detected    | Detected | Detected    | Detected    |
| 6747 | A_33_P3213910 | ARHGAP30 | Hs.389374 | Rho GTPase activating protein 30                                                         | Homo sapiens Rho GTPase activating protein 30 (ARHGAP30), transcript variant 2, mRNA [NM_181720]                                                       | 2.11780 | down | 1.72159 | down | 80.82985    | 177.25104   | 32.33325    | 49.08453    | Detected    | Detected | Detected    | Detected    |
| 6748 | A_33_P3362321 | FHL2     | Hs.443687 | four and a half LIM domains 2                                                            | Homo sapiens four and a half LIM domains 2 (FHL2), transcript variant 2, mRNA [NM_201555]                                                              | 2.11773 | down | 2.27052 | down | 6334.86800  | 13891.23800 | 7268.36670  | 14552.13600 | Detected    | Detected | Detected    | Detected    |
| 6749 | A_23_P169909  | DGKI     | Hs.242947 | diacylglycerol kinase, iota                                                              | Homo sapiens diacylglycerol kinase, iota (DGKI), mRNA [NM_004717]                                                                                      | 2.11751 | down | 2.34045 | down | 127.27599   | 279.06445   | 119.32119   | 246.25339   | Detected    | Detected | Detected    | Detected    |
| 6750 | A_33_P3336557 |          | Hs.721131 |                                                                                          | full-length cDNA clone CS0DL001YG15 of B cells (Ramos cell line) Cot 25-normalized of Homo sapiens (human) [CR591103]                                  | 2.11732 | down | 1.05923 | down | 8.35874     | 18.32567    | 9.71695     | 9.07582     | Compromised | Detected | Compromised | Compromised |
| 6751 | A_32_P70158   | LILRB3   | Hs.631592 | leukocyte immunoglobulin-like receptor, subfamily B (with TM and ITIM domains), member 3 | Homo sapiens leukocyte immunoglobulin-like receptor, subfamily B (with TM and ITIM domains), member 3 (LILRB3), transcript variant 2, mRNA [NM_006864] | 2.11698 | down | 1.53345 | down | 19.92083    | 43.66740    | 21.95743    | 29.69045    | Detected    | Detected | Detected    | Detected    |
| 6752 | A_24_P73389   | STK24    | Hs.508514 | serine/threonine kinase 24 (STE20 homolog, yeast)                                        | Homo sapiens serine/threonine kinase 24 (STE20 homolog, yeast) (STK24), transcript variant 2, mRNA [NM_001032296]                                      | 2.11668 | down | 2.33870 | down | 576.29010   | 1263.07350  | 469.68020   | 968.59595   | Detected    | Detected | Detected    | Detected    |
| 6753 | A_23_P63402   | GPSM2    | Hs.584901 | G-protein signaling modulator 2 (AGS3-like, C. elegans)                                  | Homo sapiens G-protein signaling modulator 2 (AGS3-like, C. elegans) (GPSM2), mRNA [NM_013295]                                                         | 2.11596 | down | 2.03509 | down | 1775.73660  | 3890.62180  | 1770.76540  | 3177.68300  | Detected    | Detected | Detected    | Detected    |
| 6754 | A_33_P3331588 | ATAD3B   | Hs.23413  | ATPase family, AAA domain containing 3B                                                  | Homo sapiens ATPase family, AAA domain containing 3B (ATAD3B), mRNA [NM_031921]                                                                        | 2.11511 | down | 2.34968 | down | 10746.49600 | 23536.00800 | 13221.15200 | 27393.22300 | Detected    | Detected | Detected    | Detected    |
| 6755 | A_24_P349151  | SASS6    | Hs.591447 | spindle assembly 6 homolog (C. elegans)                                                  | Homo sapiens spindle assembly 6 homolog (C. elegans) (SASS6), mRNA [NM_194292]                                                                         | 2.11396 | down | 2.07268 | down | 93.53385    | 204.73788   | 58.67680    | 107.24178   | Detected    | Detected | Detected    | Detected    |
| 6756 | A_33_P3240602 | IGFL2    |           | IGF-like family member 2                                                                 | Homo sapiens cDNA FLJ43766 fis, clone TEST12049246. [AK125754]                                                                                         | 2.11392 | down | 1.35663 | down | 19.67685    | 43.07025    | 8.73770     | 10.45258    | Detected    | Detected | Compromised | Compromised |
| 6757 | A_33_P3353170 |          | Hs.491351 |                                                                                          | Clathrin heavy chain 1 (GLH-17) [Source:UniProtKB/Swiss-Prot;Acc:Q00610] [ENST00000393043]                                                             | 2.11336 | down | 2.06796 | down | 210.07779   | 459.71347   | 141.11594   | 257.32642   | Detected    | Detected | Detected    | Detected    |
| 6758 | A_24_P412512  | NIN      | Hs.310429 | ninein (GSK3B interacting protein)                                                       | Homo sapiens ninein (GSK3B interacting protein) (NIN), transcript variant 4, mRNA [NM_016350]                                                          | 2.11335 | down | 2.03100 | down | 167.24850   | 365.98755   | 115.64679   | 207.11404   | Detected    | Detected | Detected    | Detected    |
| 6759 | A_23_P24616   | SIAE     | Hs.10056  | sialic acid acetyltransferase                                                            | Homo sapiens sialic acid acetyltransferase (SIAE), mRNA [NM_170601]                                                                                    | 2.11305 | down | 1.94112 | down | 116.93633   | 255.85408   | 98.95667    | 169.38042   | Detected    | Detected | Detected    | Detected    |

|      |               |           |           |                                                          |                                                                                                                      |         |      |         |      |             |             |             |             |          |          |          |          |
|------|---------------|-----------|-----------|----------------------------------------------------------|----------------------------------------------------------------------------------------------------------------------|---------|------|---------|------|-------------|-------------|-------------|-------------|----------|----------|----------|----------|
| 6760 | A_23_P153628  | YIF1B     | Hs.280741 | Yip1 interacting factor homolog B (S. cerevisiae)        | Homo sapiens Yip1 interacting factor homolog B (S. cerevisiae) (YIF1B), transcript variant 2, mRNA [NM_033557]       | 2.11304 | down | 2.44130 | down | 614.73206   | 1345.01440  | 604.96680   | 1302.36410  | Detected | Detected | Detected | Detected |
| 6761 | A_24_P36745   | CXorf38   | Hs.495961 | chromosome X open reading frame 38                       | Homo sapiens chromosome X open reading frame 38 (CXorf38), mRNA [NM_144570]                                          | 2.11278 | down | 2.21468 | down | 975.32935   | 2133.72600  | 869.52680   | 1698.08330  | Detected | Detected | Detected | Detected |
| 6762 | A_23_P338890  | PTPN1     | Hs.417549 | protein tyrosine phosphatase, non-receptor type 1        | Homo sapiens protein tyrosine phosphatase, non-receptor type 1 (PTPN1), mRNA [NM_002827]                             | 2.11219 | down | 1.87440 | down | 2374.95430  | 5194.22360  | 1166.46190  | 1927.96330  | Detected | Detected | Detected | Detected |
| 6763 | A_33_P3281151 | FUBP1     | Hs.567380 | far upstream element (FUSE) binding protein 1            | Homo sapiens far upstream element (FUSE) binding protein 1 (FUBP1), mRNA [NM_003902]                                 | 2.11177 | down | 2.25709 | down | 730.42500   | 1597.18580  | 665.80850   | 1325.14360  | Detected | Detected | Detected | Detected |
| 6764 | A_32_P18258   | TALDO1    | Hs.438678 | transaldolase 1                                          | Homo sapiens transaldolase 1 (TALDO1), mRNA [NM_006755]                                                              | 2.11140 | down | 1.98640 | down | 24834.14600 | 54294.07000 | 13938.81200 | 24415.07000 | Detected | Detected | Detected | Detected |
| 6765 | A_23_P28697   | HAAO      | Hs.368805 | 3-hydroxyanthranilate 3,4-dioxygenase                    | Homo sapiens 3-hydroxyanthranilate 3,4-dioxygenase (HAAO), mRNA [NM_012205]                                          | 2.11130 | down | 2.43569 | down | 245.23203   | 536.11710   | 51.42967    | 110.45883   | Detected | Detected | Detected | Detected |
| 6766 | A_33_P3230723 | KIF1B     | Hs.97858  | kinesin family member 1B                                 | Homo sapiens kinesin family member 1B (KIF1B), transcript variant 2, mRNA [NM_183416]                                | 2.11119 | down | 2.23050 | down | 134.69612   | 294.45306   | 124.35841   | 244.59277   | Detected | Detected | Detected | Detected |
| 6767 | A_33_P3246418 | MDF1      | Hs.520119 | MyoD family inhibitor                                    | Homo sapiens MyoD family inhibitor (MDF1), mRNA [NM_005586]                                                          | 2.11008 | down | 3.19873 | down | 31.51549    | 68.85824    | 26.23564    | 74.00040    | Detected | Detected | Detected | Detected |
| 6768 | A_33_P3212274 | F2R       | Hs.679786 | coagulation factor II (thrombin) receptor                | 602291527F1 NIH_MGC_86 Homo sapiens cDNA clone IMAGE4386414 5', mRNA sequence [BG026194]                             | 2.10989 | down | 2.07278 | down | 469.04385   | 1024.72180  | 433.64343   | 792.59644   | Detected | Detected | Detected | Detected |
| 6769 | A_33_P3407400 | SPEF2     | Hs.298863 | sperm flagellar 2                                        | Homo sapiens sperm flagellar 2 (SPEF2), transcript variant 2, mRNA [NM_144722]                                       | 2.10966 | down | 1.69087 | down | 72.38953    | 158.13246   | 37.73844    | 56.26776    | Detected | Detected | Detected | Detected |
| 6770 | A_23_P56590   | C1D       | Hs.602900 | C1D nuclear receptor co-repressor                        | Homo sapiens C1D nuclear receptor co-repressor (C1D), transcript variant 1, mRNA [NM_006333]                         | 2.10934 | down | 1.96526 | down | 392.30615   | 856.85120   | 319.42600   | 553.54850   | Detected | Detected | Detected | Detected |
| 6771 | A_33_P3294297 | RNF126    | Hs.69554  | ring finger protein 126                                  | Homo sapiens ring finger protein 126 (RNF126), mRNA [NM_194460]                                                      | 2.10879 | down | 2.24876 | down | 4841.84960  | 10572.48300 | 4770.55400  | 9459.70600  | Detected | Detected | Detected | Detected |
| 6772 | A_24_P121281  | AP4S1     | Hs.293411 | adaptor-related protein complex 4, sigma 1 subunit       | Homo sapiens adaptor-related protein complex 4, sigma 1 subunit (AP4S1), transcript variant 1, mRNA [NM_007077]      | 2.10864 | down | 2.10911 | down | 74.48210    | 162.58118   | 53.91050    | 100.26260   | Detected | Detected | Detected | Detected |
| 6773 | A_33_P3286218 | DLEU2L    | Hs.547964 | deleted in lymphocytic leukemia 2-like                   | Homo sapiens deleted in lymphocytic leukemia 2-like (DLEU2L), non-coding RNA [NR_002771]                             | 2.10815 | down | 2.19646 | down | 99.98975    | 218.26775   | 66.52727    | 128.85132   | Detected | Detected | Detected | Detected |
| 6774 | A_33_P3323722 | ARL4C     | Hs.111554 | ADP-ribosylation factor-like 4C                          | Homo sapiens ADP-ribosylation factor-like 4C (ARL4C), mRNA [NM_005737]                                               | 2.10775 | down | 2.03415 | down | 2411.62400  | 5263.33700  | 2570.67480  | 4611.01000  | Detected | Detected | Detected | Detected |
| 6775 | A_23_P91657   | EWSR1     | Hs.374477 | Ewing sarcoma breakpoint region 1                        | Homo sapiens Ewing sarcoma breakpoint region 1 (EWSR1), transcript variant 1, mRNA [NM_013986]                       | 2.10758 | down | 2.51796 | down | 1331.60730  | 2905.99020  | 1147.41320  | 2547.61380  | Detected | Detected | Detected | Detected |
| 6776 | A_33_P3357753 | LOC728190 |           | hypothetical LOC728190                                   | Homo sapiens hypothetical LOC728190 (LOC728190), non-coding RNA [NR_024397]                                          | 2.10629 | down | 2.12179 | down | 1708.67430  | 3726.58860  | 1189.76120  | 2226.01250  | Detected | Detected | Detected | Detected |
| 6777 | A_33_P3419621 |           |           |                                                          |                                                                                                                      | 2.10571 | down | 1.11019 | down | 1019.96014  | 2223.90190  | 54.45460    | 53.30845    | Detected | Detected | Detected | Detected |
| 6778 | A_23_P46604   | NIPAL3    | Hs.523442 | NIPA-like domain containing 3                            | Homo sapiens NIPA-like domain containing 3 (NIPAL3), mRNA [NM_020448]                                                | 2.10571 | down | 2.20097 | down | 265.23030   | 578.30120   | 241.78390   | 469.25256   | Detected | Detected | Detected | Detected |
| 6779 | A_33_P3356701 | ZDHHC12   | Hs.133122 | zinc finger, DHHC-type containing 12                     | Homo sapiens zinc finger, DHHC-type containing 12 (ZDHHC12), mRNA [NM_032793]                                        | 2.10546 | down | 2.40361 | down | 3431.86430  | 7481.85700  | 3140.85900  | 6656.99300  | Detected | Detected | Detected | Detected |
| 6780 | A_24_P233915  | MED8      | Hs.301756 | mediator complex subunit 8                               | Homo sapiens mediator complex subunit 8 (MED8), transcript variant 1, mRNA [NM_201542]                               | 2.10494 | down | 2.21502 | down | 1248.09910  | 2720.32640  | 1158.85470  | 2263.45950  | Detected | Detected | Detected | Detected |
| 6781 | A_23_P401084  | ZNF575    | Hs.213534 | zinc finger protein 575                                  | Homo sapiens zinc finger protein 575 (ZNF575), mRNA [NM_174945]                                                      | 2.10437 | down | 2.34139 | down | 225.26558   | 490.85098   | 237.96855   | 491.31420   | Detected | Detected | Detected | Detected |
| 6782 | A_33_P3220827 | PEA15     | Hs.517216 | phosphoprotein enriched in astrocytes 15                 | Homo sapiens phosphoprotein enriched in astrocytes 15 (PEA15), mRNA [NM_003768]                                      | 2.10422 | down | 2.75013 | down | 3321.86060  | 7237.78700  | 3045.68040  | 7385.89160  | Detected | Detected | Detected | Detected |
| 6783 | A_33_P3335147 | MURC      | Hs.99004  | muscle-related coiled-coil protein                       | Homo sapiens muscle-related coiled-coil protein (MURC), mRNA [NM_001018116]                                          | 2.10394 | down | 2.22733 | down | 53.91845    | 117.46372   | 41.60881    | 81.72113    | Detected | Detected | Detected | Detected |
| 6784 | A_24_P210675  | NDE1      | Hs.655378 | nudE nuclear distribution gene E homolog 1 (A. nidulans) | Homo sapiens nudE nuclear distribution gene E homolog 1 (A. nidulans) (NDE1), transcript variant 2, mRNA [NM_017668] | 2.10325 | down | 2.54568 | down | 97.12568    | 211.52309   | 51.54498    | 115.70583   | Detected | Detected | Detected | Detected |
| 6785 | A_24_P156113  | EHD2      | Hs.631554 | EH-domain containing 2                                   | Homo sapiens EH-domain containing 2 (EHD2), mRNA [NM_014601]                                                         | 2.10267 | down | 2.08747 | down | 4514.24900  | 9828.57000  | 3906.27730  | 7190.31450  | Detected | Detected | Detected | Detected |
| 6786 | A_32_P930685  | ZNF876P   | Hs.673877 | zinc finger protein 876 (pseudogene)                     | Homo sapiens zinc finger protein 876 (pseudogene) (ZNF876P), non-coding RNA [NR_027481]                              | 2.10238 | down | 1.63979 | down | 40.80991    | 88.84038    | 40.10956    | 57.99666    | Detected | Detected | Detected | Detected |
| 6787 | A_33_P3784253 | PAK1      | Hs.435714 | p21 protein (Cdc42/Rac)-activated kinase 1               | Homo sapiens p21 protein (Cdc42/Rac)-activated kinase 1 (PAK1), transcript variant 1, mRNA [NM_001128620]            | 2.10234 | down | 2.23023 | down | 1326.96070  | 2888.64010  | 1071.15170  | 2106.52370  | Detected | Detected | Detected | Detected |
| 6788 | A_33_P3233649 | C5orf33   | Hs.81907  | chromosome 5 open reading frame 33                       | Homo sapiens chromosome 5 open reading frame 33 (C5orf33), transcript variant 1, mRNA [NM_001085411]                 | 2.10207 | down | 1.86168 | down | 74.30013    | 161.72240   | 87.84058    | 144.20001   | Detected | Detected | Detected | Detected |
| 6789 | A_23_P502312  | CD97      | Hs.466039 | CD97 molecule                                            | Homo sapiens CD97 molecule (CD97), transcript variant 1, mRNA [NM_078481]                                            | 2.10201 | down | 2.42716 | down | 12405.13700 | 27000.37300 | 11619.81250 | 24869.30300 | Detected | Detected | Detected | Detected |
| 6790 | A_33_P3335910 | SYNE1     | Hs.12967  | spectrin repeat containing, nuclear envelope 1           | Homo sapiens spectrin repeat containing, nuclear envelope 1 (SYNE1), transcript variant 2, mRNA [NM_033071]          | 2.10194 | down | 2.20583 | down | 38.98674    | 84.85370    | 19.61136    | 38.14566    | Detected | Detected | Detected | Detected |

|      |               |           |           |                                                                 |                                                                                                                                                                                                                             |         |      |         |      |             |             |             |             |             |             |             |          |
|------|---------------|-----------|-----------|-----------------------------------------------------------------|-----------------------------------------------------------------------------------------------------------------------------------------------------------------------------------------------------------------------------|---------|------|---------|------|-------------|-------------|-------------|-------------|-------------|-------------|-------------|----------|
| 6791 | A_23_P80336   | TOMM22    | Hs.595072 | translocase of outer mitochondrial membrane 22 homolog (yeast)  | Homo sapiens translocase of outer mitochondrial membrane 22 homolog (yeast) (TOMM22), nuclear gene encoding mitochondrial protein, mRNA [NM_020243]                                                                         | 2.10121 | down | 2.07836 | down | 4727.34900  | 10285.37100 | 4178.33150  | 7657.52400  | Detected    | Detected    | Detected    | Detected |
| 6792 | A_24_P77364   | BOLA3     | Hs.61472  | bolA homolog 3 (E. coli)                                        | Homo sapiens bolA homolog 3 (E. coli) (BOLA3), transcript variant 1, mRNA [NM_212552]                                                                                                                                       | 2.10119 | down | 1.99932 | down | 11556.58500 | 25143.62000 | 10180.66600 | 17948.35700 | Detected    | Detected    | Detected    | Detected |
| 6793 | A_23_P369328  | C10orf35  | Hs.522992 | chromosome 10 open reading frame 35                             | Homo sapiens chromosome 10 open reading frame 35 (C10orf35), mRNA [NM_145306]                                                                                                                                               | 2.10050 | down | 1.54015 | down | 31.52509    | 68.56648    | 31.58781    | 42.89898    | Detected    | Detected    | Detected    | Detected |
| 6794 | A_23_P13524   | TMEM126A  | Hs.533725 | transmembrane protein 126A                                      | Homo sapiens transmembrane protein 126A (TMEM126A), mRNA [NM_032273]                                                                                                                                                        | 2.10021 | down | 2.03640 | down | 7383.06050  | 16055.84400 | 5234.75300  | 9399.92100  | Detected    | Detected    | Detected    | Detected |
| 6795 | A_33_P3257140 | ROCK2     | Hs.591600 | Rho-associated, coiled-coil containing protein kinase 2         | Homo sapiens Rho-associated, coiled-coil containing protein kinase 2 (ROCK2), mRNA [NM_004850]                                                                                                                              | 2.10011 | down | 1.86840 | down | 129.91766   | 282.51605   | 102.93738   | 169.59329   | Detected    | Detected    | Detected    | Detected |
| 6796 | A_23_P100676  | SMG6      | Hs.448342 | Smg-6 homolog, nonsense mediated mRNA decay factor (C. elegans) | Homo sapiens Smg-6 homolog, nonsense mediated mRNA decay factor (C. elegans) (SMG6), mRNA [NM_017575]                                                                                                                       | 2.09987 | down | 2.32304 | down | 780.99884   | 1698.14950  | 688.79364   | 1410.94600  | Detected    | Detected    | Detected    | Detected |
| 6797 | A_23_P75978   | CLPB      | Hs.523877 | ClpB caseinolytic peptidase B homolog (E. coli)                 | Homo sapiens ClpB caseinolytic peptidase B homolog (E. coli) (CLPB), mRNA [NM_030813]                                                                                                                                       | 2.09969 | down | 2.22419 | down | 735.78960   | 1599.71010  | 821.67255   | 1611.52420  | Detected    | Detected    | Detected    | Detected |
| 6798 | A_24_P13041   | RTKN2     | Hs.58559  | rhotekin 2                                                      | Homo sapiens rhotekin 2 (RTKN2), mRNA [NM_145307]                                                                                                                                                                           | 2.09914 | down | 6.05376 | down | 2.44072     | 5.30510     | 2.74950     | 14.67723    | Compromised | Compromised | Compromised | Detected |
| 6799 | A_32_P54553   | USP41     | Hs.581057 | ubiquitin specific peptidase 41                                 | Putative ubiquitin carboxyl-terminal hydrolase 41 (EC 3.1.2.15)(Ubiquitin thioesterase 41)(Ubiquitin-specific-processing protease 41)(Deubiquitinating enzyme 41) [Source:UniProtKB/Swiss-Prot;Acc:Q3LFD5] [ENST0000292729] | 2.09826 | down | 2.96411 | down | 18.26599    | 39.68575    | 14.26793    | 37.29238    | Detected    | Detected    | Detected    | Detected |
| 6800 | A_23_P42975   | PRKAR2B   | Hs.433068 | protein kinase, cAMP-dependent, regulatory, type II, beta       | Homo sapiens protein kinase, cAMP-dependent, regulatory, type II, beta (PRKAR2B), mRNA [NM_002736]                                                                                                                          | 2.09818 | down | 2.05250 | down | 71.98031    | 156.38275   | 39.34577    | 71.21104    | Detected    | Detected    | Detected    | Detected |
| 6801 | A_23_P57306   | CHAF1B    | Hs.75238  | chromatin assembly factor 1, subunit B (p60)                    | Homo sapiens chromatin assembly factor 1, subunit B (p60) (CHAF1B), mRNA [NM_005441]                                                                                                                                        | 2.09791 | down | 2.11663 | down | 1814.68620  | 3942.04600  | 1618.94170  | 3021.62840  | Detected    | Detected    | Detected    | Detected |
| 6802 | A_33_P3252800 | PTPRR     | Hs.506076 | protein tyrosine phosphatase, receptor type, R                  | Homo sapiens protein tyrosine phosphatase, receptor type, R (PTPRR), transcript variant 1, mRNA [NM_002849]                                                                                                                 | 2.09757 | down | 3.12708 | down | 16.92621    | 36.76288    | 12.92952    | 35.65228    | Detected    | Detected    | Compromised | Detected |
| 6803 | A_23_P81770   | PTP4A1    | Hs.227777 | protein tyrosine phosphatase type IVA, member 1                 | Homo sapiens protein tyrosine phosphatase type IVA, member 1 (PTP4A1), mRNA [NM_003463]                                                                                                                                     | 2.09713 | down | 1.64981 | down | 7550.74560  | 16396.42800 | 5955.33740  | 8663.75200  | Detected    | Detected    | Detected    | Detected |
| 6804 | A_33_P3345608 | C10orf137 | Hs.468688 | chromosome 10 open reading frame 137                            | Homo sapiens chromosome 10 open reading frame 137 (C10orf137), mRNA [NM_015608]                                                                                                                                             | 2.09630 | down | 2.41272 | down | 69.99095    | 151.92462   | 73.56426    | 156.50908   | Detected    | Detected    | Detected    | Detected |
| 6805 | A_23_P218892  | EIF4G1    | Hs.433750 | eukaryotic translation initiation factor 4 gamma, 1             | Homo sapiens eukaryotic translation initiation factor 4 gamma, 1 (EIF4G1), transcript variant 1, mRNA [NM_182917]                                                                                                           | 2.09630 | down | 2.23225 | down | 8865.28100  | 19243.26800 | 7265.86400  | 14301.94300 | Detected    | Detected    | Detected    | Detected |
| 6806 | A_32_P41405   | THOC3     | Hs.484227 | THO complex 3                                                   | Homo sapiens THO complex 3 (THOC3), mRNA [NM_032361]                                                                                                                                                                        | 2.09610 | down | 2.04962 | down | 4343.02640  | 9426.23500  | 3870.17040  | 6994.70750  | Detected    | Detected    | Detected    | Detected |
| 6807 | A_33_P3345816 | GPER      | Hs.20961  | G protein-coupled estrogen receptor 1                           | Homo sapiens G protein-coupled estrogen receptor 1 (GPER), transcript variant 3, mRNA [NM_001039966]                                                                                                                        | 2.09570 | down | 2.44461 | down | 377.25363   | 818.64355   | 352.18180   | 759.17410   | Detected    | Detected    | Detected    | Detected |
| 6808 | A_23_P419624  | BLCAP     | Hs.718404 | bladder cancer associated protein                               | Homo sapiens bladder cancer associated protein (BLCAP), mRNA [NM_006698]                                                                                                                                                    | 2.09566 | down | 2.15394 | down | 1804.77000  | 3916.29860  | 1338.31930  | 2541.89940  | Detected    | Detected    | Detected    | Detected |
| 6809 | A_33_P3263307 | RANGAP1   | Hs.183800 | Ran GTPase activating protein 1                                 | Homo sapiens Ran GTPase activating protein 1 (RANGAP1), mRNA [NM_002883]                                                                                                                                                    | 2.09562 | down | 2.22719 | down | 35303.34400 | 76605.72000 | 31365.24400 | 61598.69000 | Detected    | Detected    | Detected    | Detected |
| 6810 | A_33_P3404759 |           |           |                                                                 |                                                                                                                                                                                                                             | 2.09558 | down | 1.98492 | down | 46.89481    | 101.75651   | 48.78922    | 85.39507    | Detected    | Detected    | Detected    | Detected |
| 6811 | A_33_P3367077 |           |           |                                                                 |                                                                                                                                                                                                                             | 2.09550 | down | 1.71250 | down | 22.19438    | 48.15757    | 14.06983    | 21.24636    | Detected    | Detected    | Compromised | Detected |
| 6812 | A_33_P3380056 |           | Hs.530272 |                                                                 | U1PF0439 protein C9orf30 [Source:UniProtKB/Swiss-Prot;Acc:Q96H12] [ENST00000374885]                                                                                                                                         | 2.09472 | down | 2.22876 | down | 497.94208   | 1080.03500  | 399.72693   | 785.58435   | Detected    | Detected    | Detected    | Detected |
| 6813 | A_23_P431789  | ARF4      | Hs.652183 | ADP-ribosylation factor 4                                       | Homo sapiens ADP-ribosylation factor 4 (ARF4), mRNA [NM_001660]                                                                                                                                                             | 2.09426 | down | 1.91267 | down | 21377.59600 | 46357.74000 | 12916.14550 | 21784.02700 | Detected    | Detected    | Detected    | Detected |
| 6814 | A_23_P215088  | ZC3HC1    | Hs.194157 | zinc finger, C3HC-type containing 1                             | Homo sapiens zinc finger, C3HC-type containing 1 (ZC3HC1), mRNA [NM_016478]                                                                                                                                                 | 2.09390 | down | 2.11720 | down | 1400.14230  | 3035.71300  | 1256.30870  | 2345.43950  | Detected    | Detected    | Detected    | Detected |
| 6815 | A_33_P3419165 | TFPT      | Hs.590939 | TOF3 (E2A) fusion partner (in childhood Leukemia)               | Homo sapiens TCF3 (E2A) fusion partner (in childhood Leukemia) (TFPT), mRNA [NM_013342]                                                                                                                                     | 2.09333 | down | 2.24321 | down | 297.54730   | 644.95154   | 260.60270   | 515.48395   | Detected    | Detected    | Detected    | Detected |
| 6816 | A_23_P117068  | SNRPF     | Hs.105465 | small nuclear ribonucleoprotein polypeptide F                   | Homo sapiens small nuclear ribonucleoprotein polypeptide F (SNRPF), mRNA [NM_003095]                                                                                                                                        | 2.09286 | down | 1.98548 | down | 13093.72600 | 28375.03500 | 12874.63300 | 22540.66200 | Detected    | Detected    | Detected    | Detected |
| 6817 | A_32_P46981   | HSBP1L1   | Hs.191582 | heat shock factor binding protein 1-like 1                      | Homo sapiens heat shock factor binding protein 1-like 1 (HSBP1L1), mRNA [NM_001136180]                                                                                                                                      | 2.09265 | down | 2.14366 | down | 479.47556   | 1038.95460  | 520.97800   | 984.78280   | Detected    | Detected    | Detected    | Detected |
| 6818 | A_24_P914940  | LOC729991 | Hs.153629 | hypothetical protein LOC729991                                  | Homo sapiens hypothetical protein LOC729991 (LOC729991), transcript variant 1, mRNA [NM_001145784]                                                                                                                          | 2.09261 | down | 2.46211 | down | 701.38995   | 1519.78100  | 756.97920   | 1643.44840  | Detected    | Detected    | Detected    | Detected |
| 6819 | A_23_P170352  | MRPL12    | Hs.109059 | mitochondrial ribosomal protein L12                             | Homo sapiens mitochondrial ribosomal protein L12 (MRPL12), nuclear gene encoding mitochondrial protein, mRNA [NM_002949]                                                                                                    | 2.09150 | down | 2.09746 | down | 3038.96140  | 6581.37650  | 2029.88280  | 3754.31600  | Detected    | Detected    | Detected    | Detected |

|      |               |              |           |                                                                |                                                                                                                                                     |         |      |         |      |             |              |             |              |             |          |             |             |
|------|---------------|--------------|-----------|----------------------------------------------------------------|-----------------------------------------------------------------------------------------------------------------------------------------------------|---------|------|---------|------|-------------|--------------|-------------|--------------|-------------|----------|-------------|-------------|
| 6820 | A_24_P252043  | PTPA41       | Hs.227777 | protein tyrosine phosphatase type IVA, member 1                | Homo sapiens protein tyrosine phosphatase type IVA, member 1 (PTPA41), mRNA [NM_003463]                                                             | 2.09115 | down | 1.85955 | down | 263.18008   | 569.86340    | 179.55948   | 294.43008    | Detected    | Detected | Detected    | Detected    |
| 6821 | A_33_P3378031 | TMEM18       | Hs.43899  | transmembrane protein 18                                       | Homo sapiens transmembrane protein 18 (TMEM18), mRNA [NM_152834]                                                                                    | 2.09094 | down | 1.97261 | down | 1058.48830  | 2291.71120   | 1132.64060  | 1970.15150   | Detected    | Detected | Detected    | Detected    |
| 6822 | A_33_P3244224 | LOC100129048 | Hs.666120 | hypothetical LOC100129048                                      | Homo sapiens cDNA FLJ46195 fis, clone TEST14006539, [AK128074]                                                                                      | 2.09069 | down | 1.35469 | down | 30.24559    | 65.47630     | 13.54188    | 16.17644     | Detected    | Detected | Compromised | Detected    |
| 6823 | A_23_P34700   | TNNT2        | Hs.533613 | troponin T type 2 (cardiac)                                    | Homo sapiens troponin T type 2 (cardiac) (TNNT2), transcript variant 1, mRNA [NM_000364]                                                            | 2.09040 | down | 1.32848 | down | 28.24185    | 61.13021     | 12.93388    | 15.15124     | Detected    | Detected | Compromised | Compromised |
| 6824 | A_23_P87709   | PLBD1        | Hs.131933 | phospholipase B domain containing 1                            | Homo sapiens phospholipase B domain containing 1 (PLBD1), mRNA [NM_024829]                                                                          | 2.08984 | down | 1.77922 | down | 64.67964    | 139.96298    | 50.51540    | 79.25349     | Detected    | Detected | Detected    | Detected    |
| 6825 | A_33_P3393360 | LOC100130927 | Hs.10136  | hypothetical protein LOC100130927                              | Homo sapiens cDNA FLJ42793 fis, clone BRAWH3007726, [AK124783]                                                                                      | 2.08926 | down | 1.71569 | down | 46.65044    | 100.92100    | 25.35561    | 38.36007     | Detected    | Detected | Detected    | Detected    |
| 6826 | A_33_P3361147 | LOC100128130 | Hs.710990 | hypothetical LOC100128130                                      | PREDICTED: Homo sapiens hypothetical LOC100128130 (LOC100128130), miscRNA [XR_078265]                                                               | 2.08909 | down | 2.25036 | down | 103.57140   | 224.04205    | 68.05329    | 135.04128    | Detected    | Detected | Detected    | Detected    |
| 6827 | A_33_P3326432 | SEPWI        | Hs.631549 | selenoprotein W, 1                                             | Homo sapiens selenoprotein W, 1 (SEPWI), mRNA [NM_003009]                                                                                           | 2.08905 | down | 2.29499 | down | 2250.28930  | 4867.65140   | 2936.98580  | 5943.58200   | Detected    | Detected | Detected    | Detected    |
| 6828 | A_33_P3292854 | CALR         | Hs.515162 | calreticulin                                                   | Homo sapiens calreticulin (CALR), mRNA [NM_004343]                                                                                                  | 2.08799 | down | 2.14774 | down | 91636.03000 | 198119.86000 | 75677.19500 | 143322.00000 | Detected    | Detected | Detected    | Detected    |
| 6829 | A_23_P88351   | ATL1         | Hs.584905 | atlastin GTPase 1                                              | Homo sapiens atlastin GTPase 1 (ATL1), transcript variant 2, mRNA [NM_181599]                                                                       | 2.08789 | down | 2.18310 | down | 138.20370   | 298.78568    | 171.86935   | 330.85520    | Detected    | Detected | Detected    | Detected    |
| 6830 | A_23_P87150   | LPXN         | Hs.125474 | leupaxin                                                       | Homo sapiens leupaxin (LPXN), transcript variant 2, mRNA [NM_004811]                                                                                | 2.08788 | down | 1.96326 | down | 2741.94380  | 5927.84030   | 1905.60610  | 3298.96240   | Detected    | Detected | Detected    | Detected    |
| 6831 | A_23_P395534  | RSC1A1       | Hs.239459 | regulatory solute carrier protein, family 1, member 1          | Homo sapiens regulatory solute carrier protein, family 1, member 1 (RSC1A1), mRNA [NM_006511]                                                       | 2.08771 | down | 2.01033 | down | 308.09490   | 666.02155    | 294.13516   | 521.41046    | Detected    | Detected | Detected    | Detected    |
| 6832 | A_24_P336551  | BGLAP        | Hs.654541 | bone gamma-carboxyglutamate (gla) protein                      | Homo sapiens bone gamma-carboxyglutamate (gla) protein (BGLAP), mRNA [NM_199173]                                                                    | 2.08768 | down | 2.25559 | down | 51.72137    | 111.80638    | 68.27008    | 135.78616    | Detected    | Detected | Detected    | Detected    |
| 6833 | A_23_P206901  | NDE1         | Hs.655378 | nude nuclear distribution gene E homolog 1 (A. nidulans)       | Homo sapiens nude nuclear distribution gene E homolog 1 (A. nidulans) (NDE1), transcript variant 2, mRNA [NM_017668]                                | 2.08722 | down | 2.15822 | down | 5214.57280  | 11269.88400  | 3789.06130  | 7210.97200   | Detected    | Detected | Detected    | Detected    |
| 6834 | A_23_P58396   | PDGFC        | Hs.570855 | platelet derived growth factor C                               | Homo sapiens platelet derived growth factor C (PDGFC), mRNA [NM_016205]                                                                             | 2.08714 | down | 2.15584 | down | 3267.70020  | 7061.98100   | 2618.98750  | 4978.69630   | Detected    | Detected | Detected    | Detected    |
| 6835 | A_33_P3378334 | SMC2         | Hs.119023 | structural maintenance of chromosomes 2                        | Homo sapiens structural maintenance of chromosomes 2 (SMC2), transcript variant 1, mRNA [NM_001042550]                                              | 2.08672 | down | 1.83379 | down | 358.75272   | 775.16370    | 309.67610   | 500.75143    | Detected    | Detected | Detected    | Detected    |
| 6836 | A_23_P315364  | CXCL2        | Hs.75765  | chemokine (C-X-C motif) ligand 2                               | Homo sapiens chemokine (C-X-C motif) ligand 2 (CXCL2), mRNA [NM_002989]                                                                             | 2.08644 | down | 2.16435 | down | 1959.05430  | 4232.39750   | 1276.17610  | 2435.58960   | Detected    | Detected | Detected    | Detected    |
| 6837 | A_33_P3210119 | HLA-L        | Hs.656020 | major histocompatibility complex, class I, L (pseudogene)      | Homo sapiens major histocompatibility complex, class I, L (pseudogene) (HLA-L), non-coding RNA [NR_027822]                                          | 2.08638 | down | 2.67671 | down | 22.79912    | 49.25426     | 6.30710     | 14.88663     | Detected    | Detected | Compromised | Detected    |
| 6838 | A_23_P40989   | USP13        | Hs.175322 | ubiquitin specific peptidase 13 (isopeptidase T-3)             | Homo sapiens ubiquitin specific peptidase 13 (isopeptidase T-3) (USP13), mRNA [NM_003940]                                                           | 2.08494 | down | 1.94775 | down | 564.80133   | 1219.33410   | 429.40887   | 737.51490    | Detected    | Detected | Detected    | Detected    |
| 6839 | A_33_P3213892 | PRDM15       | Hs.720605 | PR domain containing 15                                        | Homo sapiens PR domain containing 15 (PRDM15), transcript variant 2, mRNA [NM_001040424]                                                            | 2.08494 | down | 2.28793 | down | 38.32715    | 82.74328     | 27.97446    | 56.43785     | Detected    | Detected | Detected    | Detected    |
| 6840 | A_33_P3286754 | SEC14L2      | Hs.335614 | SEC14-like 2 (S. cerevisiae)                                   | Homo sapiens SEC14-like 2 (S. cerevisiae) (SEC14L2), transcript variant 2, mRNA [NM_033382]                                                         | 2.08483 | down | 2.06027 | down | 76.59461    | 165.34949    | 46.08950    | 83.73217     | Detected    | Detected | Detected    | Detected    |
| 6841 | A_23_P55468   | TIMM22       | Hs.592108 | translocase of inner mitochondrial membrane 22 homolog (yeast) | Homo sapiens translocase of inner mitochondrial membrane 22 homolog (yeast) (TIMM22), nuclear gene encoding mitochondrial protein, mRNA [NM_013337] | 2.08421 | down | 2.33705 | down | 1544.34070  | 3332.86250   | 1298.62280  | 2676.19260   | Detected    | Detected | Detected    | Detected    |
| 6842 | A_33_P3357678 | LCTL         | Hs.680983 | lactase-like                                                   | Homo sapiens lactase-like (LCTL), mRNA [NM_207338]                                                                                                  | 2.08293 | down | 2.69649 | down | 24.05969    | 51.89171     | 15.63704    | 37.18084     | Detected    | Detected | Detected    | Detected    |
| 6843 | A_23_P165360  | ASB1         | Hs.516788 | ankyrin repeat and SOCS box-containing 1                       | Homo sapiens ankyrin repeat and SOCS box-containing 1 (ASB1), mRNA [NM_001040445]                                                                   | 2.08268 | down | 2.12449 | down | 1413.88530  | 3049.08280   | 1923.05020  | 3602.55800   | Detected    | Detected | Detected    | Detected    |
| 6844 | A_23_P127721  | P2RX3        | Hs.146738 | purinergic receptor P2X, ligand-gated ion channel, 3           | Homo sapiens purinergic receptor P2X, ligand-gated ion channel, 3 (P2RX3), mRNA [NM_002559]                                                         | 2.08251 | down | 1.06821 | down | 146.45450   | 315.80722    | 63.72465    | 60.02473     | Detected    | Detected | Detected    | Detected    |
| 6845 | A_23_P134100  | ULBP3        | Hs.326556 | UL16 binding protein 3                                         | Homo sapiens UL16 binding protein 3 (ULBP3), mRNA [NM_024518]                                                                                       | 2.08121 | down | 3.92921 | down | 14.20116    | 30.60357     | 9.70166     | 33.61372     | Compromised | Detected | Compromised | Detected    |
| 6846 | A_33_P3251796 | PDSS1        | Hs.558468 | prenyl (decaprenyl) diphosphate synthase, subunit 1            | Homo sapiens prenyl (decaprenyl) diphosphate synthase, subunit 1 (PDSS1), mRNA [NM_014317]                                                          | 2.08066 | down | 2.16196 | down | 277.98257   | 598.89530    | 252.99892   | 482.31653    | Detected    | Detected | Detected    | Detected    |
| 6847 | A_33_P3281435 |              |           |                                                                | Putative uncharacterized protein ENSP00000374915 [Source:UniProtKB/TrEMBL;Acc:AGNEF8] [ENST00000471857]                                             | 2.08027 | down | 3.20028 | down | 13.69518    | 29.49984     | 5.20377     | 14.68489     | Detected    | Detected | Compromised | Compromised |
| 6848 | A_33_P3351840 | LOC100128059 | Hs.587351 | hypothetical LOC100128059                                      | Homo sapiens cDNA FLJ43720 fis, clone TESOP2006068, [AK125708]                                                                                      | 2.07971 | down | 1.66084 | down | 26.49080    | 57.04668     | 16.31830    | 23.89831     | Detected    | Detected | Detected    | Detected    |
| 6849 | A_23_P415411  | HIST1H4E     | Hs.662174 | histone cluster 1, H4e                                         | Homo sapiens histone cluster 1, H4e (HIST1H4E), mRNA [NM_003545]                                                                                    | 2.07860 | down | 1.96262 | down | 151.07298   | 325.15463    | 163.74376   | 283.37810    | Detected    | Detected | Detected    | Detected    |
| 6850 | A_33_P3215422 | LYL1         | Hs.46446  | lymphoblastic leukemia derived sequence 1                      | Homo sapiens lymphoblastic leukemia derived sequence 1 (LYL1), mRNA [NM_005583]                                                                     | 2.07797 | down | 2.12601 | down | 37.80429    | 81.34155     | 47.13634    | 88.36628     | Detected    | Detected | Detected    | Detected    |
| 6851 | A_23_P331049  | DPYSL4       | Hs.100058 | dihydropyrimidinase-like 4                                     | Homo sapiens dihydropyrimidinase-like 4 (DPYSL4), mRNA [NM_006426]                                                                                  | 2.07790 | down | 2.25879 | down | 438.76065   | 944.03100    | 468.88760   | 933.92240    | Detected    | Detected | Detected    | Detected    |

|      |               |           |           |                                                                                    |                                                                                                                                                                                                                                 |         |      |         |      |             |              |             |             |          |          |          |          |
|------|---------------|-----------|-----------|------------------------------------------------------------------------------------|---------------------------------------------------------------------------------------------------------------------------------------------------------------------------------------------------------------------------------|---------|------|---------|------|-------------|--------------|-------------|-------------|----------|----------|----------|----------|
| 6852 | A_23_P364107  | C14orf106 | Hs.437941 | chromosome 14 open reading frame 106                                               | Homo sapiens chromosome 14 open reading frame 106 (C14orf106), mRNA [NM_018353]                                                                                                                                                 | 2.07781 | down | 2.19895 | down | 355.03162   | 763.84595    | 233.93356   | 453.60104   | Detected | Detected | Detected | Detected |
| 6853 | A_32_P377880  | GDNF      | Hs.271721 | glial cell derived neurotrophic factor                                             | Glial cell line-derived neurotrophic factor Precursor (Astrocyte-derived trophic factor)(ATF)(hGDNF) [Source:UniProtKB/Swiss-Prot;Acc:P39905] [ENST00000326524]                                                                 | 2.07768 | down | 2.17254 | down | 442.67377   | 952.34906    | 278.74512   | 533.99990   | Detected | Detected | Detected | Detected |
| 6854 | A_23_P310     | MARCKSL1  | Hs.75061  | MARCKS-like 1                                                                      | Homo sapiens MARCKS-like 1 (MARCKSL1), mRNA [NM_023009]                                                                                                                                                                         | 2.07725 | down | 2.36442 | down | 542.26430   | 1166.36080   | 595.13000   | 1240.79990  | Detected | Detected | Detected | Detected |
| 6855 | A_33_P3414695 | HP1BP3    | Hs.142442 | heterochromatin protein 1, binding protein 3                                       | Homo sapiens heterochromatin protein 1, binding protein 3 (HP1BP3), mRNA [NM_016287]                                                                                                                                            | 2.07587 | down | 1.82761 | down | 843.57090   | 1813.24120   | 792.47906   | 1277.13730  | Detected | Detected | Detected | Detected |
| 6856 | A_23_P428729  |           | Hs.675613 |                                                                                    | Zinc finger MYM-type protein 6 (Zinc finger protein 258) [Source:UniProtKB/Swiss-Prot;Acc:O95789] [ENST00000373333]                                                                                                             | 2.07587 | down | 2.87626 | down | 34.15274    | 73.41062     | 21.86367    | 55.45189    | Detected | Detected | Detected | Detected |
| 6857 | A_32_P139894  | ABL2      | Hs.159472 | v-abl Abelson murine leukemia viral oncogene homolog 2 (arg, Abelson-related gene) | Homo sapiens v-abl Abelson murine leukemia viral oncogene homolog 2 (arg, Abelson-related gene) (ABL2), transcript variant c, mRNA [NM_001100108]                                                                               | 2.07574 | down | 2.13714 | down | 2367.07400  | 5087.65200   | 1638.53110  | 3087.82400  | Detected | Detected | Detected | Detected |
| 6858 | A_24_P91140   | RPL23A    | Hs.419463 | ribosomal protein L23a                                                             | Homo sapiens ribosomal protein L23a (RPL23A), mRNA [NM_000984]                                                                                                                                                                  | 2.07476 | down | 2.09116 | down | 941.36080   | 2022.35570   | 775.48865   | 1429.97410  | Detected | Detected | Detected | Detected |
| 6859 | A_32_P109572  | HNRNPL    | Hs.644906 | heterogeneous nuclear ribonucleoprotein L                                          | Homo sapiens heterogeneous nuclear ribonucleoprotein L (HNRNPL), transcript variant 1, mRNA [NM_001533]                                                                                                                         | 2.07427 | down | 2.04806 | down | 3103.47020  | 6665.70750   | 2478.55220  | 4476.16940  | Detected | Detected | Detected | Detected |
| 6860 | A_24_P101201  | PDIA3     | Hs.591095 | protein disulfide isomerase family A, member 3                                     | Homo sapiens protein disulfide isomerase family A, member 3 (PDIA3), mRNA [NM_005313]                                                                                                                                           | 2.07409 | down | 2.03312 | down | 5067.45950  | 10883.03900  | 4364.11870  | 7823.91940  | Detected | Detected | Detected | Detected |
| 6861 | A_24_P116017  | PSMD9     | Hs.131151 | proteasome (prosome, macropain) 26S subunit, non-ATPase, 9                         | Homo sapiens proteasome (prosome, macropain) 26S subunit, non-ATPase, 9 (PSMD9), mRNA [NM_002813]                                                                                                                               | 2.07344 | down | 2.10335 | down | 157.24770   | 337.60420    | 154.82465   | 287.15590   | Detected | Detected | Detected | Detected |
| 6862 | A_23_P404162  | HDAC9     | Hs.196054 | histone deacetylase 9                                                              | Homo sapiens histone deacetylase 9 (HDAC9), transcript variant 3, mRNA [NM_014707]                                                                                                                                              | 2.07322 | down | 2.02895 | down | 88.72928    | 190.47852    | 45.03919    | 80.57991    | Detected | Detected | Detected | Detected |
| 6863 | A_23_P166677  | MFSF1     | Hs.58663  | major facilitator superfamily domain containing 1                                  | Homo sapiens major facilitator superfamily domain containing 1 (MFSF1), mRNA [NM_022736]                                                                                                                                        | 2.07317 | down | 2.01527 | down | 4517.46700  | 9697.56700   | 4079.22560  | 7248.98140  | Detected | Detected | Detected | Detected |
| 6864 | A_23_P70688   | LY86      | Hs.653138 | lymphocyte antigen 86                                                              | Homo sapiens lymphocyte antigen 86 (LY86), mRNA [NM_004271]                                                                                                                                                                     | 2.07291 | down | 2.03345 | down | 206.46829   | 443.16684    | 159.69864   | 286.35180   | Detected | Detected | Detected | Detected |
| 6865 | A_33_P3423027 | NRL       | Hs.652297 | neural retina leucine zipper                                                       | Homo sapiens neural retina leucine zipper (NRL), mRNA [NM_006177]                                                                                                                                                               | 2.07289 | down | 2.18462 | down | 88.47009    | 189.89203    | 85.28803    | 164.29672   | Detected | Detected | Detected | Detected |
| 6866 | A_23_P132159  | USP18     | Hs.38260  | ubiquitin specific peptidase 18                                                    | Homo sapiens ubiquitin specific peptidase 18 (USP18), mRNA [NM_017414]                                                                                                                                                          | 2.07287 | down | 2.28286 | down | 109.29862   | 234.59573    | 80.87825    | 162.80795   | Detected | Detected | Detected | Detected |
| 6867 | A_24_P787889  | TMEM191A  | Hs.645547 | transmembrane protein 191A                                                         | Homo sapiens transmembrane protein 191A (TMEM191A), non-coding RNA [NR_026815]                                                                                                                                                  | 2.07267 | down | 2.35693 | down | 261.46027   | 561.13794    | 301.90830   | 627.46173   | Detected | Detected | Detected | Detected |
| 6868 | A_33_P3332547 | SCHIP1    | Hs.134685 | schwannomin interacting protein 1                                                  | Homo sapiens schwannomin interacting protein 1 (SCHIP1), mRNA [NM_014575]                                                                                                                                                       | 2.07241 | down | 1.93828 | down | 174.20377   | 373.82390    | 177.53787   | 303.44028   | Detected | Detected | Detected | Detected |
| 6869 | A_23_P845     | TOMM40L   | Hs.321653 | translocase of outer mitochondrial membrane 40 homolog (yeast)-like                | Homo sapiens translocase of outer mitochondrial membrane 40 homolog (yeast)-like (TOMM40L), nuclear gene encoding mitochondrial protein, mRNA [NM_032174]                                                                       | 2.07209 | down | 1.93732 | down | 1852.10600  | 3973.81320   | 1748.95310  | 2987.74800  | Detected | Detected | Detected | Detected |
| 6870 | A_23_P161152  | PDSS1     | Hs.558468 | prenyl (decaprenyl) diphosphate synthase, subunit 1                                | Homo sapiens prenyl (decaprenyl) diphosphate synthase, subunit 1 (PDSS1), mRNA [NM_014317]                                                                                                                                      | 2.07205 | down | 2.09748 | down | 638.59270   | 1370.11760   | 623.96783   | 1154.05310  | Detected | Detected | Detected | Detected |
| 6871 | A_23_P46429   | CYR61     | Hs.8867   | cysteine-rich, angiogenic inducer, 61                                              | Homo sapiens cysteine-rich, angiogenic inducer, 61 (CYR61), mRNA [NM_001554]                                                                                                                                                    | 2.07111 | down | 2.06077 | down | 55029.30000 | 118012.91000 | 43313.51600 | 78707.92000 | Detected | Detected | Detected | Detected |
| 6872 | A_24_P261567  | GDPD5     | Hs.503297 | glycerophosphodiester phosphodiesterase domain containing 5                        | Homo sapiens glycerophosphodiester phosphodiesterase domain containing 5 (GDPD5), mRNA [NM_030792]                                                                                                                              | 2.07107 | down | 1.73655 | down | 62.47339    | 133.97480    | 56.97766    | 87.24838    | Detected | Detected | Detected | Detected |
| 6873 | A_24_P143492  | BCAS4     | Hs.381178 | breast carcinoma amplified sequence 4                                              | Homo sapiens breast carcinoma amplified sequence 4 (BCAS4), transcript variant 3, mRNA [NM_00101974]                                                                                                                            | 2.07054 | down | 2.20948 | down | 211.00093   | 452.37753    | 242.73242   | 472.91467   | Detected | Detected | Detected | Detected |
| 6874 | A_24_P942904  | BMPER     | Hs.660998 | BMP binding endothelial regulator                                                  | BMP-binding endothelial regulator protein Precursor (Bone morphogenetic protein-binding endothelial cell precursor-derived regulator)(Protein crossveinless-2)(PCV2) [Source:UniProtKB/Swiss-Prot;Acc:Q8N8U9] [ENST00000297161] | 2.07011 | down | 3.05687 | down | 20.73415    | 44.44391     | 14.69899    | 39.62135    | Detected | Detected | Detected | Detected |
| 6875 | A_24_P56130   | MYL6      | Hs.632717 | myosin, light chain 6, alkali, smooth muscle and non-muscle                        | Homo sapiens myosin, light chain 6, alkali, smooth muscle and non-muscle (MYL6), transcript variant 2, mRNA [NM_079423]                                                                                                         | 2.06987 | down | 1.96214 | down | 54984.75800 | 117847.17000 | 49092.33000 | 84939.58000 | Detected | Detected | Detected | Detected |
| 6876 | A_24_P235429  | ABCA1     | Hs.429294 | ATP-binding cassette, sub-family A (ABC1), member 1                                | Homo sapiens ATP-binding cassette, sub-family A (ABC1), member 1 (ABCA1), mRNA [NM_005502]                                                                                                                                      | 2.06937 | down | 1.94108 | down | 1911.30830  | 4095.45310   | 1299.33390  | 2223.97830  | Detected | Detected | Detected | Detected |
| 6877 | A_32_P12639   | PSMD12    | Hs.592689 | proteasome (prosome, macropain) 26S subunit, non-ATPase, 12                        | Homo sapiens proteasome (prosome, macropain) 26S subunit, non-ATPase, 12 (PSMD12), transcript variant 1, mRNA [NM_002816]                                                                                                       | 2.06904 | down | 1.87553 | down | 4192.44730  | 8981.93000   | 3842.61870  | 6355.00500  | Detected | Detected | Detected | Detected |
| 6878 | A_33_P3352712 | CDR2L     | Hs.78358  | cerebellar degeneration-related protein 2-like                                     | Homo sapiens cerebellar degeneration-related protein 2-like (CDR2L), mRNA [NM_014603]                                                                                                                                           | 2.06898 | down | 2.30899 | down | 49.67925    | 106.43002    | 54.82245    | 111.62080   | Detected | Detected | Detected | Detected |

|      |               |              |           |                                                                                                   |                                                                                                                                                                                                                              |         |      |         |      |            |            |            |            |             |          |             |             |
|------|---------------|--------------|-----------|---------------------------------------------------------------------------------------------------|------------------------------------------------------------------------------------------------------------------------------------------------------------------------------------------------------------------------------|---------|------|---------|------|------------|------------|------------|------------|-------------|----------|-------------|-------------|
| 6879 | A_24_P157926  | TNFAIP3      | Hs.211600 | tumor necrosis factor, alpha-induced protein 3                                                    | Homo sapiens tumor necrosis factor, alpha-induced protein 3 (TNFAIP3), mRNA [NM_006290]                                                                                                                                      | 2.06893 | down | 1.87689 | down | 458.70688  | 982.68427  | 308.79486  | 511.06268  | Detected    | Detected | Detected    | Detected    |
| 6880 | A_23_P68547   | MCM8         | Hs.597484 | minichromosome maintenance complex component 8                                                    | Homo sapiens minichromosome maintenance complex component 8 (MCM8), transcript variant 2, mRNA [NM_182802]                                                                                                                   | 2.06878 | down | 2.00423 | down | 612.85800  | 1312.82900 | 513.67060  | 907.81464  | Detected    | Detected | Detected    | Detected    |
| 6881 | A_23_P210581  | KCNGB1       | Hs.118695 | potassium voltage-gated channel, subfamily G, member 1                                            | Homo sapiens potassium voltage-gated channel, subfamily G, member 1 (KCNGB1), mRNA [NM_002237]                                                                                                                               | 2.06863 | down | 2.31379 | down | 1568.94460 | 3360.65140 | 1314.69450 | 2682.33840 | Detected    | Detected | Detected    | Detected    |
| 6882 | A_32_P92281   | LOC100132832 | Hs.720896 | postmeiotic segregation increased 2-like 5-like                                                   | Homo sapiens postmeiotic segregation increased 2-like 5-like (LOC100132832), non-coding RNA [NR_028058]                                                                                                                      | 2.06848 | down | 1.96038 | down | 44.97765   | 96.33431   | 37.44844   | 64.73505   | Detected    | Detected | Detected    | Detected    |
| 6883 | A_33_P3338631 | NRL          | Hs.652297 | neural retina leucine zipper                                                                      | Homo sapiens neural retina leucine zipper (NRL), mRNA [NM_006177]                                                                                                                                                            | 2.06840 | down | 2.18981 | down | 57.97276   | 124.16299  | 72.00587   | 139.03972  | Detected    | Detected | Detected    | Detected    |
| 6884 | A_24_P721699  | NCRNA00181   |           | non-protein coding RNA 181                                                                        | Homo sapiens non-protein coding RNA 181 (NCRNA00181), non-coding RNA [NR_015380]                                                                                                                                             | 2.06782 | down | 2.17826 | down | 493.78482  | 1057.26450 | 583.48004  | 1120.73240 | Detected    | Detected | Detected    | Detected    |
| 6885 | A_23_P257578  | SRA1         | Hs.653135 | steroid receptor RNA activator 1                                                                  | Homo sapiens steroid receptor RNA activator 1 (SRA1), mRNA [NM_001035235]                                                                                                                                                    | 2.06662 | down | 2.01708 | down | 2375.07200 | 5082.40770 | 1864.97270 | 3317.11230 | Detected    | Detected | Detected    | Detected    |
| 6886 | A_23_P353524  | IVL          | Hs.516439 | involucrin                                                                                        | Homo sapiens involucrin (IVL), mRNA [NM_005547]                                                                                                                                                                              | 2.06660 | down | 2.13303 | down | 148.68791  | 318.17440  | 174.49306  | 328.20074  | Detected    | Detected | Detected    | Detected    |
| 6887 | A_33_P3230798 |              |           |                                                                                                   | Muscle, skeletal receptor tyrosine protein kinase Precursor [EC:2.7.10.1](Muscle-specific tyrosine protein kinase receptor)(MuSK)-specific kinase receptor)(MuSK) [Source:UniProtKB/Swiss-Prot;Acc:Q15146] [ENST00000374441] | 2.06654 | down | 1.43447 | down | 157.04108  | 336.03894  | 68.46333   | 86.59948   | Detected    | Detected | Detected    | Detected    |
| 6888 | A_33_P3290914 | SMC1A        | Hs.211602 | structural maintenance of chromosomes 1A                                                          | Homo sapiens structural maintenance of chromosomes 1A (SMC1A), mRNA [NM_006306]                                                                                                                                              | 2.06616 | down | 3.50239 | down | 21.12748   | 45.20073   | 17.33290   | 53.53053   | Detected    | Detected | Detected    | Detected    |
| 6889 | A_33_P3212665 | LOC401233    | Hs.582928 | similar to HIV TAT specific factor 1; cofactor required for Tat activation of HIV-1 transcription | PREDICTED: Homo sapiens similar to HIV TAT specific factor 1; cofactor required for Tat activation of HIV-1 transcription (LOC401233), miscRNA [XR_040704]                                                                   | 2.06566 | down | 2.23358 | down | 161.49800  | 345.42940  | 46.47936   | 91.54344   | Detected    | Detected | Detected    | Detected    |
| 6890 | A_32_P123088  | TMED7-TICAM2 | Hs.642817 | TMED7-TICAM2 readthrough                                                                          | Homo sapiens TMED7-TICAM2 readthrough transcript (TMED7-TICAM2), transcript variant 1, mRNA [NM_001164468]                                                                                                                   | 2.06476 | down | 2.10949 | down | 286.20970  | 611.91034  | 268.00946  | 498.53226  | Detected    | Detected | Detected    | Detected    |
| 6891 | A_24_P364296  | STX2         | Hs.437585 | syntaxin 2                                                                                        | Homo sapiens syntaxin 2 (STX2), transcript variant 1, mRNA [NM_001980]                                                                                                                                                       | 2.06412 | down | 2.31160 | down | 1375.85080 | 2940.62260 | 859.55040  | 1752.06360 | Detected    | Detected | Detected    | Detected    |
| 6892 | A_24_P766716  | CMKLR1       | Hs.197143 | chemokine-like receptor 1                                                                         | Homo sapiens chemokine-like receptor 1 (CMKLR1), transcript variant 1, mRNA [NM_001142343]                                                                                                                                   | 2.06386 | down | 2.67363 | down | 136.10617  | 290.86462  | 103.04839  | 242.94496  | Detected    | Detected | Detected    | Detected    |
| 6893 | A_23_P316612  | GLIS1        | Hs.306691 | GLIS family zinc finger 1                                                                         | Homo sapiens GLIS family zinc finger 1 (GLIS1), mRNA [NM_147193]                                                                                                                                                             | 2.06375 | down | 2.06169 | down | 1337.12280 | 2857.33300 | 1029.50780 | 1871.62800 | Detected    | Detected | Detected    | Detected    |
| 6894 | A_33_P3323041 |              |           |                                                                                                   | KN motif and ankyrin repeat domain-containing protein 1 (Ankyrin repeat domain-containing protein 15)(Kidney ankyrin repeat-containing protein) [Source:UniProtKB/Swiss-Prot;Acc:Q14678] [ENST00000354485]                   | 2.06294 | down | 2.47482 | down | 63.28421   | 135.18053  | 53.49307   | 116.73660  | Detected    | Detected | Detected    | Detected    |
| 6895 | A_23_P25994   | LGMN         | Hs.719135 | legumain                                                                                          | Homo sapiens legumain (LGMN), transcript variant 2, mRNA [NM_001008530]                                                                                                                                                      | 2.06182 | down | 1.92563 | down | 778.30190  | 1661.62000 | 802.65110  | 1362.90100 | Detected    | Detected | Detected    | Detected    |
| 6896 | A_23_P96688   | SUV420H1     | Hs.632120 | suppressor of variegation 4-20 homolog 1 (Drosophila)                                             | Homo sapiens suppressor of variegation 4-20 homolog 1 (Drosophila) (SUV420H1), transcript variant 2, mRNA [NM_016028]                                                                                                        | 2.06150 | down | 2.01448 | down | 65.34137   | 139.47772  | 43.25069   | 76.82851   | Detected    | Detected | Detected    | Detected    |
| 6897 | A_24_P67408   |              |           |                                                                                                   |                                                                                                                                                                                                                              | 2.06089 | down | 2.17947 | down | 1111.66210 | 2372.24930 | 1324.19530 | 2544.88900 | Detected    | Detected | Detected    | Detected    |
| 6898 | A_23_P150549  | PGA3         | Hs.601055 | pepsinogen 3, group I (pepsinogen A)                                                              | Homo sapiens pepsinogen 3, group I (pepsinogen A) (PGA3), mRNA [NM_001079807]                                                                                                                                                | 2.06082 | down | 2.12625 | down | 12.50874   | 26.69241   | 7.56412    | 14.18200   | Compromised | Detected | Compromised | Compromised |
| 6899 | A_33_P3365810 | MRPL12       | Hs.109059 | mitochondrial ribosomal protein L12                                                               | Homo sapiens mitochondrial ribosomal protein L12 (MRPL12), nuclear gene encoding mitochondrial protein, mRNA [NM_002949]                                                                                                     | 2.06063 | down | 2.10272 | down | 2293.67240 | 4893.99800 | 1517.00480 | 2812.76660 | Detected    | Detected | Detected    | Detected    |
| 6900 | A_24_P334130  | FN1          | Hs.203717 | fibronectin 1                                                                                     | Homo sapiens fibronectin 1 (FN1), transcript variant 7, mRNA [NM_054034]                                                                                                                                                     | 2.06043 | down | 1.95692 | down | 4491.87900 | 9583.38300 | 5408.40600 | 9332.72600 | Detected    | Detected | Detected    | Detected    |
| 6901 | A_32_P226205  |              | Hs.525247 |                                                                                                   | Zinc finger homeobox protein 2 (Zinc finger homeodomain protein 2)(ZFH-2) [Source:UniProtKB/Swiss-Prot;Acc:Q9C0A1] [ENST00000258869]                                                                                         | 2.06019 | down | 1.27981 | down | 20.33369   | 43.37669   | 23.41800   | 26.42780   | Detected    | Detected | Detected    | Detected    |
| 6902 | A_33_P3315801 | CRKRS        | Hs.416108 | Cdc2-related kinase, arginine/serine-rich                                                         | Homo sapiens Cdc2-related kinase, arginine/serine-rich (CRKRS), transcript variant 1, mRNA [NM_016507]                                                                                                                       | 2.05977 | down | 2.36474 | down | 50.88180   | 108.52128  | 52.21736   | 108.88412  | Detected    | Detected | Detected    | Detected    |
| 6903 | A_23_P501877  | ZFP64        | Hs.473082 | zinc finger protein 64 homolog (mouse)                                                            | Homo sapiens zinc finger protein 64 homolog (mouse) (ZFP64), transcript variant 1, mRNA [NM_018197]                                                                                                                          | 2.05896 | down | 1.99274 | down | 552.32117  | 1177.53430 | 463.47757  | 814.41296  | Detected    | Detected | Detected    | Detected    |
| 6904 | A_23_P387471  | MICB         | Hs.719929 | MHC class I polypeptide-related sequence B                                                        | Homo sapiens MHC class I polypeptide-related sequence B (MICB), mRNA [NM_005931]                                                                                                                                             | 2.05868 | down | 2.09098 | down | 1813.39340 | 3865.57080 | 1217.90990 | 2245.59200 | Detected    | Detected | Detected    | Detected    |
| 6905 | A_23_P100196  | USP10        | Hs.136778 | ubiquitin specific peptidase 10                                                                   | Homo sapiens ubiquitin specific peptidase 10 (USP10), mRNA [NM_005153]                                                                                                                                                       | 2.05859 | down | 1.91779 | down | 616.16534  | 1313.40710 | 481.25696  | 813.84680  | Detected    | Detected | Detected    | Detected    |



|      |               |              |           |                                                                             |                                                                                                                                                                              |         |      |         |      |             |             |             |             |          |          |             |             |
|------|---------------|--------------|-----------|-----------------------------------------------------------------------------|------------------------------------------------------------------------------------------------------------------------------------------------------------------------------|---------|------|---------|------|-------------|-------------|-------------|-------------|----------|----------|-------------|-------------|
| 6906 | A_33_P3241696 |              |           |                                                                             | Membrane-associated transporter protein (Solute carrier family 45 member 2)(Melanoma antigen AIM1)(Protein AIM-1) [Source:UniProtKB/Swiss-Prot;Acc:Q8UMX9] [ENST00000345083] | 2.05763 | down | 1.53443 | down | 102.95721   | 219.36009   | 8.28345     | 11.20790    | Detected | Detected | Compromised | Compromised |
| 6907 | A_33_P3374289 | C10orf82     | Hs.121347 | chromosome 10 open reading frame 82                                         | Homo sapiens chromosome 10 open reading frame 82 (C10orf82), mRNA [NM_144661]                                                                                                | 2.05752 | down | 1.46476 | down | 27.26273    | 58.08269    | 14.80906    | 19.12759    | Detected | Detected | Compromised | Detected    |
| 6908 | A_33_P3303837 | CASP2        | Hs.368982 | caspace 2, apoptosis-related cysteine peptidase                             | Homo sapiens caspase 2, apoptosis-related cysteine peptidase (CASP2), transcript variant 1, mRNA [NM_032932]                                                                 | 2.05751 | down | 1.32437 | down | 666.35360   | 1419.64490  | 150.76656   | 176.06808   | Detected | Detected | Detected    | Detected    |
| 6909 | A_33_P3252785 |              |           |                                                                             | Placenta-specific protein 9 Precursor [Source:UniProtKB/Swiss-Prot;Acc:Q5JTB6] [ENST00000372270]                                                                             | 2.05732 | down | 2.09841 | down | 998.60270   | 2127.29270  | 652.67487   | 1207.68260  | Detected | Detected | Detected    | Detected    |
| 6910 | A_33_P3246950 |              | Hs.127078 |                                                                             | BX117927 Soares_NFL_T_GBC_S1 Homo sapiens cDNA clone [MAGp989E153901, mRNA sequence [BX117927]                                                                               | 2.05722 | down | 1.34822 | down | 231.29510   | 492.69644   | 49.73011    | 59.12139    | Detected | Detected | Detected    | Detected    |
| 6911 | A_33_P3268181 | LIMS2        | Hs.469881 | LIM and senescent cell antigen-like domains 2                               | Homo sapiens LIM and senescent cell antigen-like domains 2 (LIMS2), transcript variant 5, mRNA [NM_001161404]                                                                | 2.05645 | down | 1.85032 | down | 41.52562    | 88.42360    | 36.45251    | 59.47586    | Detected | Detected | Detected    | Detected    |
| 6912 | A_33_P3239278 | OR4D10       | Hs.553756 | olfactory receptor, family 4, subfamily D, member 10                        | Homo sapiens olfactory receptor, family 4, subfamily D, member 10 (OR4D10), mRNA [NM_001004705]                                                                              | 2.05590 | down | 2.22886 | down | 77.41276    | 164.79614   | 18.96488    | 37.27328    | Detected | Detected | Detected    | Detected    |
| 6913 | A_33_P3298473 |              | Hs.547855 |                                                                             | Putative lung carcinoma-associated protein 10 [Source:UniProtKB/Swiss-Prot;Acc:Q71F78] [ENST00000357566]                                                                     | 2.05568 | down | 1.18701 | down | 17.84077    | 37.97535    | 2.93890     | 3.07612     | Detected | Detected | Compromised | Compromised |
| 6914 | A_23_P98183   | HRAS         | Hs.37003  | v-Ha-ras Harvey rat sarcoma viral oncogene homolog                          | Homo sapiens v-Ha-ras Harvey rat sarcoma viral oncogene homolog (HRAS), transcript variant 1, mRNA [NM_005343]                                                               | 2.05511 | down | 2.22592 | down | 2770.59810  | 5895.77200  | 2502.50120  | 4911.89500  | Detected | Detected | Detected    | Detected    |
| 6915 | A_33_P3316068 |              |           |                                                                             |                                                                                                                                                                              | 2.05394 | down | 2.33139 | down | 34.50556    | 73.38557    | 42.27893    | 86.91682    | Detected | Detected | Detected    | Detected    |
| 6916 | A_23_P414252  | SNX8         | Hs.584900 | sorting nexin 8                                                             | Homo sapiens sorting nexin 8 (SNX8), mRNA [NM_013321]                                                                                                                        | 2.05394 | down | 2.19883 | down | 2632.72800  | 5599.21830  | 3555.37700  | 6893.53400  | Detected | Detected | Detected    | Detected    |
| 6917 | A_24_P415280  | SEC61A2      | Hs.112955 | Sec61 alpha 2 subunit (S. cerevisiae)                                       | Homo sapiens Sec61 alpha 2 subunit (S. cerevisiae) (SEC61A2), transcript variant 1, mRNA [NM_0181144]                                                                        | 2.05327 | down | 1.64373 | down | 88.62353    | 188.42038   | 72.33949    | 104.85079   | Detected | Detected | Detected    | Detected    |
| 6918 | A_33_P3226560 |              |           |                                                                             |                                                                                                                                                                              | 2.05312 | down | 1.08488 | down | 16.01038    | 34.03688    | 8.16618     | 7.81209     | Detected | Detected | Compromised | Compromised |
| 6919 | A_23_P153745  | IFI30        | Hs.14623  | interferon, gamma-inducible protein 30                                      | Homo sapiens interferon, gamma-inducible protein 30 (IFI30), mRNA [NM_006332]                                                                                                | 2.05311 | down | 2.06201 | down | 2695.16750  | 5729.69040  | 3622.73020  | 6587.05600  | Detected | Detected | Detected    | Detected    |
| 6920 | A_23_P314101  | SUSD2        | Hs.131819 | sushi domain containing 2                                                   | Homo sapiens sushi domain containing 2 (SUSD2), mRNA [NM_019601]                                                                                                             | 2.05279 | down | 2.44925 | down | 310.57526   | 660.15283   | 249.87150   | 539.65424   | Detected | Detected | Detected    | Detected    |
| 6921 | A_33_P3833256 | LOC440028    | Hs.677541 | hypothetical gene supported by BC040853                                     | Homo sapiens cDNA FLJ33294 fis. clone BNGH42000791 [AK090613]                                                                                                                | 2.05238 | down | 1.20780 | down | 407.63147   | 866.28186   | 101.95817   | 108.58848   | Detected | Detected | Detected    | Detected    |
| 6922 | A_33_P3343220 | GLTPD1       | Hs.515689 | glycolipid transfer protein domain containing 1                             | Homo sapiens glycolipid transfer protein domain containing 1 (GLTPD1), mRNA [NM_001029885]                                                                                   | 2.05219 | down | 2.32469 | down | 5330.91300  | 11327.97100 | 5450.77200  | 11173.48100 | Detected | Detected | Detected    | Detected    |
| 6923 | A_33_P3248272 | UBXN8        | Hs.153678 | UBX domain protein 8                                                        | Homo sapiens UBX domain protein 8 (UBXN8), mRNA [NM_005671]                                                                                                                  | 2.05186 | down | 2.26385 | down | 239.31630   | 508.45520   | 251.12311   | 501.30320   | Detected | Detected | Detected    | Detected    |
| 6924 | A_33_P3268304 | LIMS2        | Hs.469881 | LIM and senescent cell antigen-like domains 2                               | Homo sapiens LIM and senescent cell antigen-like domains 2 (LIMS2), transcript variant 5, mRNA [NM_001161404]                                                                | 2.05072 | down | 2.05543 | down | 4083.51540  | 8671.07400  | 3601.13430  | 6528.89500  | Detected | Detected | Detected    | Detected    |
| 6925 | A_23_P204998  | FARP1        | Hs.403917 | FERM, RhoGEF (ARHGEF) and pleckstrin domain protein 1 (chondrocyte-derived) | Homo sapiens FERM, RhoGEF (ARHGEF) and pleckstrin domain protein 1 (chondrocyte-derived) (FARP1), transcript variant 1, mRNA [NM_005766]                                     | 2.05061 | down | 2.01369 | down | 1262.65280  | 2681.01780  | 995.66626   | 1767.95950  | Detected | Detected | Detected    | Detected    |
| 6926 | A_33_P3230436 | ZNF714       | Hs.466291 | zinc finger protein 714                                                     | Homo sapiens zinc finger protein 714 (ZNF714), mRNA [NM_182515]                                                                                                              | 2.04972 | down | 2.28897 | down | 350.28467   | 743.44640   | 199.11089   | 401.88437   | Detected | Detected | Detected    | Detected    |
| 6927 | A_23_P162879  | C14orf153    | Hs.720135 | chromosome 14 open reading frame 153                                        | Homo sapiens chromosome 14 open reading frame 153 (C14orf153), mRNA [NM_032374]                                                                                              | 2.04967 | down | 1.97454 | down | 1962.77320  | 4165.68700  | 1902.66700  | 3312.79100  | Detected | Detected | Detected    | Detected    |
| 6928 | A_23_P360797  | NTF3         | Hs.99171  | neurotrophin 3                                                              | Homo sapiens neurotrophin 3 (NTF3), transcript variant 2, mRNA [NM_002527]                                                                                                   | 2.04957 | down | 1.93125 | down | 31.01014    | 65.81131    | 18.65075    | 31.76139    | Detected | Detected | Detected    | Detected    |
| 6929 | A_24_P465772  | RPSAP52      | Hs.558686 | ribosomal protein SA pseudogene 52                                          | Homo sapiens ribosomal protein SA pseudogene 52 (RPSAP52), non-coding RNA [NR_026825]                                                                                        | 2.04948 | down | 1.86560 | down | 15721.74300 | 33364.00400 | 14989.30600 | 24658.44300 | Detected | Detected | Detected    | Detected    |
| 6930 | A_33_P3365845 |              |           |                                                                             |                                                                                                                                                                              | 2.04912 | down | 3.63738 | down | 21.12058    | 44.81330    | 3.49761     | 11.21828    | Detected | Detected | Compromised | Compromised |
| 6931 | A_23_P158007  | ZDHHC12      | Hs.133122 | zinc finger, DHHC-type containing 12                                        | Homo sapiens zinc finger, DHHC-type containing 12 (ZDHHC12), mRNA [NM_032799]                                                                                                | 2.04757 | down | 2.46123 | down | 596.95780   | 1265.65780  | 554.73645   | 1203.93960  | Detected | Detected | Detected    | Detected    |
| 6932 | A_23_P86064   | HHIPL2       | Hs.665660 | HHIP-like 2                                                                 | Homo sapiens HHIP-like 2 (HHIPL2), mRNA [NM_024746]                                                                                                                          | 2.04703 | down | 1.20950 | down | 12.75231    | 27.02995    | 19.27730    | 20.55968    | Detected | Detected | Detected    | Detected    |
| 6933 | A_33_P3240996 | LOC100133638 | Hs.98178  | similar to LOC339742 protein                                                | PREDICTED: Homo sapiens hypothetical LOC100133638 (LOC100133638), mRNA [XM_001714231]                                                                                        | 2.04692 | down | 1.95778 | down | 396.94736   | 841.32996   | 235.27448   | 406.16635   | Detected | Detected | Detected    | Detected    |
| 6934 | A_23_P94461   | FSD1L        | Hs.136901 | fibronectin type III and SPRY domain containing 1-like                      | Homo sapiens fibronectin type III and SPRY domain containing 1-like (FSD1L), transcript variant 2, mRNA [NM_031919]                                                          | 2.04681 | down | 1.39773 | down | 28.86162    | 61.16895    | 27.43850    | 33.81814    | Detected | Detected | Detected    | Detected    |
| 6935 | A_23_P111487  | SRRT         | Hs.111801 | serrate RNA effector molecule homolog (Arabidopsis)                         | Homo sapiens serrate RNA effector molecule homolog (Arabidopsis) (SRRT), transcript variant 4, mRNA [NM_001128853]                                                           | 2.04614 | down | 2.23788 | down | 358.79090   | 760.16690   | 277.13052   | 546.87274   | Detected | Detected | Detected    | Detected    |

|      |               |              |           |                                                                      |                                                                                                                 |         |      |         |      |            |             |            |             |             |          |             |             |
|------|---------------|--------------|-----------|----------------------------------------------------------------------|-----------------------------------------------------------------------------------------------------------------|---------|------|---------|------|------------|-------------|------------|-------------|-------------|----------|-------------|-------------|
| 6936 | A_24_P143171  | TMEM47       | Hs.8769   | transmembrane protein 47                                             | Homo sapiens transmembrane protein 47 (TMEM47), mRNA [NM_031442]                                                | 2.04546 | down | 1.96886 | down | 865.94640  | 1834.06240  | 700.03650  | 1215.35080  | Detected    | Detected | Detected    | Detected    |
| 6937 | A_23_P37391   | CODC85C      | Hs.709288 | coiled-coil domain containing 85C                                    | Homo sapiens coiled-coil domain containing 85C (CODC85C), mRNA [NM_001144995]                                   | 2.04483 | down | 1.78285 | down | 230.87366  | 488.83690   | 171.16052  | 269.08096   | Detected    | Detected | Detected    | Detected    |
| 6938 | A_33_P3224878 | ITGA4        | Hs.440955 | integrin, alpha 4 (antigen CD49D, alpha 4 subunit of VLA-4 receptor) | Homo sapiens integrin, alpha 4 (antigen CD49D, alpha 4 subunit of VLA-4 receptor) (ITGA4), mRNA [NM_000885]     | 2.04434 | down | 6.30995 | down | 15.27099   | 32.32607    | 5.00245    | 27.83391    | Detected    | Detected | Compromised | Detected    |
| 6939 | A_23_P164946  | FKRP         | Hs.515493 | fukutin related protein                                              | Homo sapiens fukutin related protein (FKRP), transcript variant 2, mRNA [NM_001039885]                          | 2.04366 | down | 2.54433 | down | 287.18173  | 607.71356   | 342.87964  | 769.27350   | Detected    | Detected | Detected    | Detected    |
| 6940 | A_33_P3332145 | RPN2         | Hs.370895 | ribophorin II                                                        | Homo sapiens ribophorin II (RPN2), transcript variant 1, mRNA [NM_002951]                                       | 2.04310 | down | 1.82919 | down | 3968.97490 | 8396.57000  | 2478.79640 | 3998.20970  | Detected    | Detected | Detected    | Detected    |
| 6941 | A_33_P3235841 | SLC22A20     | Hs.532372 | solute carrier family 22, member 20                                  | Homo sapiens solute carrier family 22, member 20 (SLC22A20), mRNA [NM_001004326]                                | 2.04276 | down | 1.88070 | down | 9.23131    | 19.52604    | 9.82571    | 16.29480    | Compromised | Detected | Compromised | Detected    |
| 6942 | A_33_P3860067 | LOC554174    | Hs.660824 | hypothetical LOC554174                                               | Homo sapiens hypothetical LOC554174, mRNA (cDNA clone MGC:16743 IMAGE:4130428), complete cds [BC009388]         | 2.04265 | down | 1.18284 | down | 19.37610   | 40.98192    | 22.48134   | 23.44835    | Detected    | Detected | Detected    | Detected    |
| 6943 | A_23_P352435  | RGS12        | Hs.527061 | regulator of G-protein signaling 12                                  | Homo sapiens regulator of G-protein signaling 12 (RGS12), transcript variant 2, mRNA [NM_002926]                | 2.04256 | down | 2.39981 | down | 239.17775  | 505.85770   | 213.17813  | 451.11258   | Detected    | Detected | Detected    | Detected    |
| 6944 | A_24_P767901  |              |           |                                                                      |                                                                                                                 | 2.04213 | down | 1.19527 | down | 163.04930  | 344.77448   | 9.69254    | 10.21569    | Detected    | Detected | Compromised | Compromised |
| 6945 | A_33_P3343432 | THEM4        | Hs.164070 | thioesterase superfamily member 4                                    | Homo sapiens thioesterase superfamily member 4 (THEM4), mRNA [NM_053055]                                        | 2.04070 | down | 2.01224 | down | 189.81818  | 401.09772   | 152.20322  | 270.06497   | Detected    | Detected | Detected    | Detected    |
| 6946 | A_23_P60166   | DEPDC6       | Hs.112981 | DEP domain containing 6                                              | Homo sapiens DEP domain containing 6 (DEPDC6), mRNA [NM_022783]                                                 | 2.04047 | down | 2.51742 | down | 75.83478   | 160.22548   | 52.52521   | 116.59759   | Detected    | Detected | Detected    | Detected    |
| 6947 | A_24_P183128  | PLAC8        | Hs.546392 | placenta-specific 8                                                  | Homo sapiens placenta-specific 8 (PLAC8), transcript variant 2, mRNA [NM_016619]                                | 2.03989 | down | 1.64723 | down | 8.51294    | 17.98119    | 13.41728   | 19.48875    | Compromised | Detected | Detected    | Detected    |
| 6948 | A_33_P3340624 | LOC100130065 |           | similar to D-dopa-chrome tautomerase                                 | PREDICTED: Homo sapiens similar to D-dopa-chrome tautomerase (LOC100130065), mRNA [XM_001725355]                | 2.03968 | down | 2.06978 | down | 1447.87800 | 3057.92770  | 827.75880  | 1510.75620  | Detected    | Detected | Detected    | Detected    |
| 6949 | A_33_P3367970 |              |           |                                                                      |                                                                                                                 | 2.03951 | down | 2.08674 | down | 159.81665  | 337.50555   | 97.20542   | 178.86461   | Detected    | Detected | Detected    | Detected    |
| 6950 | A_23_P101655  | ACTN4        | Hs.270291 | actinin, alpha 4                                                     | Homo sapiens actinin, alpha 4 (ACTN4), mRNA [NM_004924]                                                         | 2.03920 | down | 2.31288 | down | 1384.12010 | 2922.57890  | 1210.31430 | 2468.40500  | Detected    | Detected | Detected    | Detected    |
| 6951 | A_23_P6909    | CCRL1        | Hs.719388 | chemokine (C-C motif) receptor-like 1                                | Homo sapiens chemokine (C-C motif) receptor-like 1 (CCRL1), transcript variant 1, mRNA [NM_178445]              | 2.03832 | down | 2.11639 | down | 204.91342  | 432.49005   | 198.78993  | 370.98383   | Detected    | Detected | Detected    | Detected    |
| 6952 | A_23_P501770  | ATRIP        | Hs.694840 | ATR interacting protein                                              | Homo sapiens ATR interacting protein (ATRIP), transcript variant 2, mRNA [NM_032166]                            | 2.03793 | down | 2.51139 | down | 137.84978  | 290.89020   | 149.01001  | 329.98590   | Detected    | Detected | Detected    | Detected    |
| 6953 | A_33_P3412722 | SNX8         | Hs.584900 | sorting nexin 8                                                      | Homo sapiens sorting nexin 8 (SNX8), mRNA [NM_013321]                                                           | 2.03770 | down | 2.29971 | down | 2139.87180 | 4515.04250  | 2285.12770 | 4633.93300  | Detected    | Detected | Detected    | Detected    |
| 6954 | A_33_P3214481 | P4HA1        | Hs.500047 | prolyl 4-hydroxylase, alpha polypeptide I                            | Homo sapiens prolyl 4-hydroxylase, alpha polypeptide I (P4HA1), transcript variant 3, mRNA [NM_001142595]       | 2.03753 | down | 1.93824 | down | 3429.96140 | 7236.46700  | 2521.93750 | 4310.30470  | Detected    | Detected | Detected    | Detected    |
| 6955 | A_23_P55064   | WRAP53       | Hs.437460 | WD repeat containing, antisense to TP53                              | Homo sapiens WD repeat containing, antisense to TP53 (WRAP53), transcript variant 1, mRNA [NM_018081]           | 2.03730 | down | 2.27936 | down | 224.18324  | 472.92374   | 265.14490  | 532.91907   | Detected    | Detected | Detected    | Detected    |
| 6956 | A_23_P133629  | CDC23        | Hs.73625  | cell division cycle 23 homolog (S. cerevisiae)                       | Homo sapiens cell division cycle 23 homolog (S. cerevisiae) (CDC23), mRNA [NM_004661]                           | 2.03678 | down | 1.86405 | down | 1105.57590 | 2331.65940  | 1090.60280 | 1792.62670  | Detected    | Detected | Detected    | Detected    |
| 6957 | A_23_P259521  | WDR41        | Hs.482573 | WD repeat domain 41                                                  | Homo sapiens WD repeat domain 41 (WDR41), mRNA [NM_018268]                                                      | 2.03641 | down | 1.88708 | down | 2015.86770 | 4250.70900  | 1229.32520 | 2045.60660  | Detected    | Detected | Detected    | Detected    |
| 6958 | A_23_P152782  | IFI35        | Hs.632258 | interferon-induced protein 35                                        | Homo sapiens interferon-induced protein 35 (IFI35), mRNA [NM_005533]                                            | 2.03629 | down | 2.12433 | down | 422.75378  | 891.37555   | 361.37277  | 676.92896   | Detected    | Detected | Detected    | Detected    |
| 6959 | A_23_P386420  | GTF2H3       | Hs.355348 | general transcription factor IIH, polypeptide 3, 34kDa               | Homo sapiens general transcription factor IIH, polypeptide 3, 34kDa (GTF2H3), mRNA [NM_001516]                  | 2.03624 | down | 1.73283 | down | 219.85593  | 463.55356   | 165.98438  | 253.62291   | Detected    | Detected | Detected    | Detected    |
| 6960 | A_24_P43876   | C9orf40      | Hs.532296 | chromosome 9 open reading frame 40                                   | Homo sapiens chromosome 9 open reading frame 40 (C9orf40), mRNA [NM_017998]                                     | 2.03586 | down | 1.93007 | down | 636.22050  | 1341.18250  | 414.11804  | 704.79440   | Detected    | Detected | Detected    | Detected    |
| 6961 | A_33_P3217958 | FCHSD2       | Hs.577053 | FCH and double SH3 domains 2                                         | Homo sapiens FCH and double SH3 domains 2 (FCHSD2), mRNA [NM_014824]                                            | 2.03584 | down | 2.40660 | down | 16.59285   | 34.97814    | 13.41218   | 28.46222    | Detected    | Detected | Compromised | Detected    |
| 6962 | A_23_P215549  | PON3         | Hs.440967 | paraoxonase 3                                                        | Homo sapiens paraoxonase 3 (PON3), mRNA [NM_000940]                                                             | 2.03550 | down | 2.34888 | down | 45.28404   | 95.44412    | 24.34313   | 50.41994    | Detected    | Detected | Detected    | Detected    |
| 6963 | A_33_P3366028 | C20orf118    | Hs.472630 | chromosome 20 open reading frame 118                                 | Homo sapiens chromosome 20 open reading frame 118 (C20orf118), mRNA [NM_008026]                                 | 2.03541 | down | 2.28726 | down | 8.72424    | 18.38709    | 5.12854    | 10.34370    | Compromised | Detected | Compromised | Compromised |
| 6964 | A_23_P111481  | SRRT         | Hs.111801 | serrate RNA effector molecule homolog (Arabidopsis)                  | Homo sapiens serrate RNA effector molecule homolog (Arabidopsis) (SRRT), transcript variant 1, mRNA [NM_015908] | 2.03515 | down | 2.11429 | down | 9605.46700 | 20241.77100 | 5611.90230 | 10462.61400 | Detected    | Detected | Detected    | Detected    |
| 6965 | A_33_P3268334 | PGAM1        | Hs.632918 | phosphoglycerate mutase 1 (brain)                                    | Homo sapiens phosphoglycerate mutase 1 (brain) (PGAM1), mRNA [NM_002629]                                        | 2.03505 | down | 2.28943 | down | 1901.72140 | 4007.33030  | 2346.75150 | 4737.62600  | Detected    | Detected | Detected    | Detected    |
| 6966 | A_24_P250227  | NR1D1        | Hs.592130 | nuclear receptor subfamily 1, group D, member 1                      | Homo sapiens nuclear receptor subfamily 1, group D, member 1 (NR1D1), mRNA [NM_021724]                          | 2.03457 | down | 2.25925 | down | 907.86500  | 1912.61010  | 1091.90900 | 2175.28610  | Detected    | Detected | Detected    | Detected    |
| 6967 | A_33_P3250133 | VSIG10       | Hs.187824 | V-set and immunoglobulin domain containing 10                        | Homo sapiens V-set and immunoglobulin domain containing 10 (VSIG10), mRNA [NM_019086]                           | 2.03419 | down | 1.88496 | down | 92.17714   | 194.15508   | 89.54816   | 148.84123   | Detected    | Detected | Detected    | Detected    |

|      |               |             |           |                                                                                    |                                                                                                                                                         |         |      |         |      |             |             |             |             |             |          |             |             |
|------|---------------|-------------|-----------|------------------------------------------------------------------------------------|---------------------------------------------------------------------------------------------------------------------------------------------------------|---------|------|---------|------|-------------|-------------|-------------|-------------|-------------|----------|-------------|-------------|
| 6968 | A_23_P30884   | CLIC1       | Hs.415456 | chloride intracellular channel 1                                                   | Homo sapiens chloride intracellular channel 1 (CLIC1), mRNA [NM_001288]                                                                                 | 2.03401 | down | 2.06637 | down | 30529.83200 | 64299.88300 | 27361.67800 | 49855.82400 | Detected    | Detected | Detected    | Detected    |
| 6969 | A_24_P904903  | BAT1        | Hs.254042 | HLA-B associated transcript 1                                                      | Homo sapiens HLA-B associated transcript 1 (BAT1), transcript variant 1, mRNA [NM_004640]                                                               | 2.03393 | down | 1.97104 | down | 534.47030   | 1125.62220  | 444.14078   | 771.93713   | Detected    | Detected | Detected    | Detected    |
| 6970 | A_23_P52147   | TBCE        | Hs.498143 | tubulin folding cofactor E                                                         | Homo sapiens tubulin folding cofactor E (TBCE), transcript variant 1, mRNA [NM_001079515]                                                               | 2.03363 | down | 2.06331 | down | 5855.44500  | 12330.07800 | 4221.54440  | 7680.71240  | Detected    | Detected | Detected    | Detected    |
| 6971 | A_33_P3280094 | LRFN4       | Hs.209979 | leucine rich repeat and fibronectin type III domain containing 4                   | Homo sapiens leucine rich repeat and fibronectin type III domain containing 4 (LRFN4), mRNA [NM_024036]                                                 | 2.03323 | down | 2.14766 | down | 9388.06100  | 19764.89600 | 8304.52500  | 15727.00300 | Detected    | Detected | Detected    | Detected    |
| 6972 | A_32_P226078  | OAZ3        | Hs.713789 | ornithine decarboxylase antizyme 3                                                 | Homo sapiens ornithine decarboxylase antizyme 3 (OAZ3), transcript variant 1, mRNA [NM_016178]                                                          | 2.03285 | down | 2.38970 | down | 50.66272    | 106.64150   | 48.68619    | 102.59212   | Detected    | Detected | Detected    | Detected    |
| 6973 | A_23_P22614   | SEPT6       | Hs.496666 | septin 6                                                                           | Homo sapiens septin 6 (SEPT6), transcript variant V, mRNA [NM_145802]                                                                                   | 2.03235 | down | 2.02894 | down | 190.71619   | 401.34705   | 159.94707   | 286.16107   | Detected    | Detected | Detected    | Detected    |
| 6974 | A_33_P3723600 | TYRO3P      | Hs.684881 | TYRO3P protein tyrosine kinase pseudogene                                          | Homo sapiens TYRO3P protein tyrosine kinase pseudogene (TYRO3P), non-coding RNA [NR_028510]                                                             | 2.03212 | down | 1.89550 | down | 10.10946    | 21.27213    | 8.03140     | 13.42394    | Compromised | Detected | Compromised | Compromised |
| 6975 | A_23_P129209  | IDH2        | Hs.596461 | isocitrate dehydrogenase 2 (NADP+), mitochondrial                                  | Homo sapiens isocitrate dehydrogenase 2 (NADP+), mitochondrial (IDH2), nuclear gene encoding mitochondrial protein, mRNA [NM_002168]                    | 2.03193 | down | 2.21120 | down | 1915.64940  | 4030.49900  | 1751.16740  | 3414.44730  | Detected    | Detected | Detected    | Detected    |
| 6976 | A_33_P3230541 |             |           |                                                                                    | Myosin phosphatase Rho-interacting protein (M-RIP)/Rho-interacting protein 3 (RIP3)(p116Rip) [Source:UniProtKB/Swiss-Prot;Acc:Q6WCG1] [ENST00000395806] | 2.03175 | down | 2.05563 | down | 102.01978   | 214.62845   | 27.06718    | 49.06304    | Detected    | Detected | Detected    | Detected    |
| 6977 | A_33_P3413671 | ABL2        | Hs.159472 | v-abl Abelson murine leukemia viral oncogene homolog 2 (arg, Abelson-related gene) | Homo sapiens v-abl Abelson murine leukemia viral oncogene homolog 2 (arg, Abelson-related gene) (ABL2), transcript variant c, mRNA [NM_001100108]       | 2.03151 | down | 2.00841 | down | 122.13392   | 256.91476   | 126.03368   | 223.20575   | Detected    | Detected | Detected    | Detected    |
| 6978 | A_33_P3399090 | DIXDC1      | Hs.655626 | DIX domain containing 1                                                            | Homo sapiens DIX domain containing 1 (DIXDC1), transcript variant 1, mRNA [NM_001037954]                                                                | 2.03120 | down | 2.15086 | down | 3898.04100  | 8198.46900  | 3456.51660  | 6555.65800  | Detected    | Detected | Detected    | Detected    |
| 6979 | A_32_P191786  | ANKRD24     | Hs.197872 | ankyrin repeat domain 24                                                           | Homo sapiens ankyrin repeat domain 24 (ANKRD24), mRNA [NM_133475]                                                                                       | 2.03115 | down | 1.22886 | down | 86.31521    | 181.53569   | 17.83399    | 19.32481    | Detected    | Detected | Detected    | Detected    |
| 6980 | A_33_P3293734 |             |           |                                                                                    |                                                                                                                                                         | 2.03096 | down | 2.14668 | down | 744.85034   | 1566.40660  | 738.13770   | 1397.23830  | Detected    | Detected | Detected    | Detected    |
| 6981 | A_32_P204218  | FAM180A     | Hs.55200  | family with sequence similarity 180, member A                                      | Homo sapiens family with sequence similarity 180, member A (FAM180A), mRNA [NM_205855]                                                                  | 2.03085 | down | 2.91379 | down | 95.63067    | 201.09793   | 75.72580    | 194.56621   | Detected    | Detected | Detected    | Detected    |
| 6982 | A_33_P3216237 | BZW2        | Hs.487635 | basic leucine zipper and W2 domains 2                                              | Homo sapiens basic leucine zipper and W2 domains 2 (BZW2), transcript variant 1, mRNA [NM_001159767]                                                    | 2.03083 | down | 1.86932 | down | 3596.33620  | 7562.51400  | 2724.98780  | 4491.74270  | Detected    | Detected | Detected    | Detected    |
| 6983 | A_33_P3251896 | APBB2       | Hs.479602 | amyloid beta (A4) precursor protein-binding, family B, member 2                    | Homo sapiens amyloid beta (A4) precursor protein-binding, family B, member 2 (APBB2), transcript variant 1, mRNA [NM_004307]                            | 2.03074 | down | 2.10868 | down | 175.80634   | 369.67636   | 161.19078   | 299.71976   | Detected    | Detected | Detected    | Detected    |
| 6984 | A_33_P3313899 | hCG_2045830 | Hs.636379 | hCG2045830                                                                         | AGENCOURT_7968336 NIH_MGC_68 Homo sapiens cDNA clone IMAGE:6011092 5', mRNA sequence [BU158429]                                                         | 2.03047 | down | 2.42671 | down | 30.31423    | 63.73480    | 15.93282    | 34.09378    | Detected    | Detected | Detected    | Detected    |
| 6985 | A_23_P114405  | MORF4L2     | Hs.326387 | mortality factor 4 like 2                                                          | Homo sapiens mortality factor 4 like 2 (MORF4L2), transcript variant 2, mRNA [NM_012286]                                                                | 2.03010 | down | 1.97065 | down | 8575.57100  | 18026.60700 | 6524.99700  | 11338.49600 | Detected    | Detected | Detected    | Detected    |
| 6986 | A_24_P373152  | CFL2        | Hs.180141 | cofilin 2 (muscle)                                                                 | Homo sapiens cofilin 2 (muscle) (CFL2), transcript variant 1, mRNA [NM_021914]                                                                          | 2.02991 | down | 1.86206 | down | 3012.34470  | 6331.60700  | 2219.45340  | 3644.21730  | Detected    | Detected | Detected    | Detected    |
| 6987 | A_24_P56894   | CRLF3       | Hs.370168 | cytokine receptor-like factor 3                                                    | Homo sapiens cytokine receptor-like factor 3 (CRLF3), mRNA [NM_015986]                                                                                  | 2.02937 | down | 1.80094 | down | 71.60404    | 150.46370   | 62.71298    | 99.59139    | Detected    | Detected | Detected    | Detected    |
| 6988 | A_23_P209933  | TGOLN2      | Hs.593382 | trans-golgi network protein 2                                                      | Homo sapiens trans-golgi network protein 2 (TGOLN2), mRNA [NM_006464]                                                                                   | 2.02866 | down | 2.07622 | down | 643.80360   | 1352.37320  | 719.30817   | 1316.90110  | Detected    | Detected | Detected    | Detected    |
| 6989 | A_23_P161098  | ELK4        | Hs.497520 | ELK4, ETS-domain protein (SRF accessory protein 1)                                 | Homo sapiens ELK4, ETS-domain protein (SRF accessory protein 1) (ELK4), transcript variant a, mRNA [NM_001973]                                          | 2.02806 | down | 1.53637 | down | 19.07014    | 40.04675    | 22.83272    | 30.93284    | Detected    | Detected | Detected    | Detected    |
| 6990 | A_32_P28665   | SNRPA1      | Hs.528763 | small nuclear ribonucleoprotein polypeptide A'                                     | Homo sapiens small nuclear ribonucleoprotein polypeptide A' (SNRPA1), mRNA [NM_003090]                                                                  | 2.02765 | down | 1.88478 | down | 5919.33940  | 12427.92100 | 5305.16300  | 8817.09500  | Detected    | Detected | Detected    | Detected    |
| 6991 | A_23_P135977  | CKAP5       | Hs.201253 | cytoskeleton associated protein 5                                                  | Homo sapiens cytoskeleton associated protein 5 (CKAP5), transcript variant 1, mRNA [NM_001008938]                                                       | 2.02763 | down | 2.13297 | down | 2125.77610  | 4463.13100  | 1577.35950  | 2966.74880  | Detected    | Detected | Detected    | Detected    |
| 6992 | A_33_P3277060 |             |           |                                                                                    |                                                                                                                                                         | 2.02668 | down | 1.00620 | down | 48.50466    | 101.78900   | 19.33655    | 17.15643    | Detected    | Detected | Detected    | Detected    |
| 6993 | A_24_P137434  | DCBLD2      | Hs.203691 | discoidin, CUB and LCCL domain containing 2                                        | Homo sapiens discoidin, CUB and LCCL domain containing 2 (DCBLD2), mRNA [NM_080927]                                                                     | 2.02665 | down | 2.00841 | down | 9183.29300  | 19271.31000 | 7981.29500  | 14134.86100 | Detected    | Detected | Detected    | Detected    |
| 6994 | A_24_P81947   | CORO1C      | Hs.330384 | coronin, actin binding protein, 1C                                                 | Homo sapiens coronin, actin binding protein, 1C (CORO1C), transcript variant 1, mRNA [NM_014325]                                                        | 2.02542 | down | 1.80632 | down | 7013.74600  | 14709.49900 | 4976.76800  | 7926.98000  | Detected    | Detected | Detected    | Detected    |
| 6995 | A_23_P333951  | DNAH14      | Hs.133977 | dynein, axonemal, heavy chain 14                                                   | Homo sapiens dynein, axonemal, heavy chain 14 (DNAH14), transcript variant 3, mRNA [NM_144989]                                                          | 2.02525 | down | 1.80428 | down | 154.29846   | 323.57330   | 141.96239   | 225.86215   | Detected    | Detected | Detected    | Detected    |
| 6996 | A_24_P272073  |             |           |                                                                                    |                                                                                                                                                         | 2.02478 | down | 1.74525 | down | 1264.36340  | 2650.83740  | 426.88068   | 656.94714   | Detected    | Detected | Detected    | Detected    |
| 6997 | A_33_P3290909 | SMC1A       | Hs.211602 | structural maintenance of chromosomes 1A                                           | Homo sapiens structural maintenance of chromosomes 1A (SMC1A), mRNA [NM_006306]                                                                         | 2.02409 | down | 2.74852 | down | 716.34150   | 1501.35620  | 311.26130   | 754.37760   | Detected    | Detected | Detected    | Detected    |

|      |               |              |           |                                                                                     |                                                                                                                  |         |      |         |      |             |             |             |             |             |          |             |             |
|------|---------------|--------------|-----------|-------------------------------------------------------------------------------------|------------------------------------------------------------------------------------------------------------------|---------|------|---------|------|-------------|-------------|-------------|-------------|-------------|----------|-------------|-------------|
| 6998 | A_33_P3805839 |              |           |                                                                                     |                                                                                                                  | 2.02341 | down | 3.06742 | down | 17.04451    | 35.71087    | 8.51983     | 23.04460    | Detected    | Detected | Compromised | Detected    |
| 6999 | A_33_P3212370 |              |           |                                                                                     |                                                                                                                  | 2.02297 | down | 2.04697 | down | 14.75470    | 30.90664    | 19.12933    | 34.52834    | Detected    | Detected | Detected    | Detected    |
| 7000 | A_23_P345799  | FAM129C      | Hs.434133 | family with sequence similarity 129, member C                                       | Homo sapiens family with sequence similarity 129, member C (FAM129C), transcript variant 1, mRNA [NM_173544]     | 2.02233 | down | 1.39160 | down | 31.00659    | 64.92902    | 10.12871    | 12.42890    | Detected    | Detected | Compromised | Compromised |
| 7001 | A_33_P3361067 | ABCG2        | Hs.480218 | ATP-binding cassette, sub-family G (WHITE), member 2                                | Homo sapiens ATP-binding cassette, sub-family G (WHITE), member 2 (ABCG2), mRNA [NM_004827]                      | 2.02214 | down | 1.66649 | down | 22.36160    | 46.82163    | 18.32889    | 26.93418    | Detected    | Detected | Detected    | Detected    |
| 7002 | A_23_P106602  | CRISPLD2     | Hs.513779 | cysteine-rich secretory protein LCCL domain containing 2                            | Homo sapiens cysteine-rich secretory protein LCCL domain containing 2 (CRISPLD2), mRNA [NM_031476]               | 2.02208 | down | 1.98876 | down | 491.89820   | 1029.92790  | 504.73540   | 885.13806   | Detected    | Detected | Detected    | Detected    |
| 7003 | A_23_P144369  | NAP1L5       | Hs.12554  | nucleosome assembly protein 1-like 5                                                | Homo sapiens nucleosome assembly protein 1-like 5 (NAP1L5), mRNA [NM_153757]                                     | 2.02183 | down | 1.91985 | down | 419.09070   | 877.37460   | 348.04970   | 589.21686   | Detected    | Detected | Detected    | Detected    |
| 7004 | A_23_P120270  | MCFD2        | Hs.293689 | multiple coagulation factor deficiency 2                                            | Homo sapiens multiple coagulation factor deficiency 2 (MCFD2), mRNA [NM_139279]                                  | 2.02177 | down | 1.94844 | down | 4643.62600  | 9721.23200  | 3787.29080  | 6507.01800  | Detected    | Detected | Detected    | Detected    |
| 7005 | A_24_P211797  | ICA1L        | Hs.516629 | islet cell autoantigen 1,69kDa-like                                                 | Homo sapiens islet cell autoantigen 1,69kDa-like (ICA1L), transcript variant 2, mRNA [NM_178231]                 | 2.02126 | down | 2.10029 | down | 28.22541    | 59.07378    | 16.97185    | 31.43213    | Detected    | Detected | Detected    | Detected    |
| 7006 | A_33_P3296499 | PTPRK        | Hs.155919 | protein tyrosine phosphatase, receptor type, K                                      | Homo sapiens protein tyrosine phosphatase, receptor type, K (PTPRK), transcript variant 2, mRNA [NM_002844]      | 2.02103 | down | 2.63705 | down | 69.28146    | 144.98492   | 82.19510    | 191.13040   | Detected    | Detected | Detected    | Detected    |
| 7007 | A_23_P89069   | LHFP         | Hs.507798 | lipoma HMGIC fusion partner                                                         | Homo sapiens lipoma HMGIC fusion partner (LHFP), mRNA [NM_005780]                                                | 2.02101 | down | 1.90809 | down | 10321.17600 | 21598.88500 | 7784.03700  | 13096.95900 | Detected    | Detected | Detected    | Detected    |
| 7008 | A_23_P53884   | MAB21L1      | Hs.584776 | mab-21-like 1 (C. elegans)                                                          | Homo sapiens mab-21-like 1 (C. elegans) (MAB21L1), mRNA [NM_005584]                                              | 2.02032 | down | 1.64041 | down | 39.90991    | 83.48973    | 34.48248    | 49.87869    | Detected    | Detected | Detected    | Detected    |
| 7009 | A_33_P3290567 | WEE1         | Hs.249441 | WEE1 homolog (S. pombe)                                                             | Homo sapiens WEE1 homolog (S. pombe) (WEE1), transcript variant 1, mRNA [NM_003390]                              | 2.01877 | down | 1.87841 | down | 704.40967   | 1472.46280  | 498.90580   | 826.36847   | Detected    | Detected | Detected    | Detected    |
| 7010 | A_33_P3420792 | PDAP1        | Hs.632296 | PDGFA associated protein 1                                                          | Homo sapiens PDGFA associated protein 1 (PDAP1), mRNA [NM_014891]                                                | 2.01849 | down | 2.53304 | down | 63.81813    | 133.38390   | 38.34867    | 85.65604    | Detected    | Detected | Detected    | Detected    |
| 7011 | A_33_P3366053 | ADPRH        | Hs.99884  | ADP-ribosylarginine hydrolase                                                       | Homo sapiens ADP-ribosylarginine hydrolase (ADPRH), mRNA [NM_001125]                                             | 2.01799 | down | 2.10028 | down | 206.51852   | 431.53024   | 117.29849   | 217.23776   | Detected    | Detected | Detected    | Detected    |
| 7012 | A_33_P3235880 | TBC1D28      | Hs.434123 | TBC1 domain family, member 28                                                       | Homo sapiens TBC1 domain family, member 28 (TBC1D28), mRNA [NM_001039397]                                        | 2.01777 | down | 1.32490 | down | 10.10242    | 21.10721    | 11.13678    | 13.01092    | Compromised | Detected | Compromised | Compromised |
| 7013 | A_33_P3230176 | SELI         | Hs.189073 | selenoprotein I                                                                     | Homo sapiens selenoprotein I (SELI), mRNA [NM_033505]                                                            | 2.01759 | down | 2.48139 | down | 35.46822    | 74.09766    | 26.52375    | 58.03577    | Detected    | Detected | Detected    | Detected    |
| 7014 | A_24_P391260  | PTTG1IP      | Hs.474010 | pituitary tumor-transforming 1 interacting protein                                  | Homo sapiens pituitary tumor-transforming 1 interacting protein (PTTG1IP), mRNA [NM_004339]                      | 2.01710 | down | 2.20965 | down | 638.38840   | 1333.35490  | 722.66240   | 1408.06880  | Detected    | Detected | Detected    | Detected    |
| 7015 | A_23_P159110  | SLC35E3      | Hs.506011 | solute carrier family 35, member E3                                                 | Homo sapiens solute carrier family 35, member E3 (SLC35E3), mRNA [NM_018666]                                     | 2.01693 | down | 1.85607 | down | 593.84735   | 1240.21850  | 416.78080   | 682.13153   | Detected    | Detected | Detected    | Detected    |
| 7016 | A_33_P3424826 | tcag7.1213   |           | hypothetical LOC393076                                                              | PREDICTED: Homo sapiens hypothetical LOC393076 (LOC393076), miscRNA [XR_016902]                                  | 2.01678 | down | 1.77368 | down | 31.73826    | 66.27889    | 21.93320    | 34.30376    | Detected    | Detected | Detected    | Detected    |
| 7017 | A_32_P29784   | TPM3         | Hs.644306 | tropomyosin 3                                                                       | Homo sapiens tropomyosin 3 (TPM3), transcript variant 3, mRNA [NM_001043332]                                     | 2.01666 | down | 1.96309 | down | 22377.05900 | 46726.99200 | 17043.49200 | 29502.89500 | Detected    | Detected | Detected    | Detected    |
| 7018 | A_23_P30264   | IPO11        | Hs.482269 | importin 11                                                                         | Homo sapiens importin 11 (IPO11), transcript variant 2, mRNA [NM_016338]                                         | 2.01578 | down | 1.91406 | down | 99.96272    | 208.64789   | 100.53458   | 169.68239   | Detected    | Detected | Detected    | Detected    |
| 7019 | A_23_P74269   | SRM          | Hs.76244  | spermidine synthase                                                                 | Homo sapiens spermidine synthase (SRM), mRNA [NM_003132]                                                         | 2.01554 | down | 2.34843 | down | 4635.35160  | 9674.03100  | 5147.54900  | 10659.68500 | Detected    | Detected | Detected    | Detected    |
| 7020 | A_23_P42042   | LYRM2        | Hs.177275 | LYR motif containing 2                                                              | Homo sapiens LYR motif containing 2 (LYRM2), transcript variant 1, mRNA [NM_020466]                              | 2.01545 | down | 1.95365 | down | 303.35666   | 633.07996   | 341.29062   | 587.94574   | Detected    | Detected | Detected    | Detected    |
| 7021 | A_33_P3346193 | TPM3         | Hs.644306 | tropomyosin 3                                                                       | Homo sapiens tropomyosin 3 (TPM3), transcript variant 4, mRNA [NM_001043351]                                     | 2.01526 | down | 1.90341 | down | 698.00060   | 1456.53210  | 177.18695   | 297.39197   | Detected    | Detected | Detected    | Detected    |
| 7022 | A_33_P3260614 | PLCB2        | Hs.355888 | phospholipase C, beta 2                                                             | Homo sapiens phospholipase C, beta 2 (PLCB2), mRNA [NM_004573]                                                   | 2.01483 | down | 1.94507 | down | 94.67899    | 197.52680   | 94.11113    | 161.41405   | Detected    | Detected | Detected    | Detected    |
| 7023 | A_33_P3313245 | AMACR        | Hs.508343 | alpha-methylacyl-CoA racemase                                                       | Homo sapiens alpha-methylacyl-CoA racemase (AMACR), transcript variant 1, mRNA [NM_014324]                       | 2.01476 | down | 2.32149 | down | 180.68102   | 376.93630   | 187.51637   | 383.85822   | Detected    | Detected | Detected    | Detected    |
| 7024 | A_23_P57137   | C20orf29     | Hs.104806 | chromosome 20 open reading frame 29                                                 | Homo sapiens chromosome 20 open reading frame 29 (C20orf29), mRNA [NM_018347]                                    | 2.01460 | down | 1.98035 | down | 1521.25850  | 3173.40280  | 1408.08370  | 2458.87480  | Detected    | Detected | Detected    | Detected    |
| 7025 | A_24_P135753  | PTPLB        | Hs.705480 | protein tyrosine phosphatase-like (proline instead of catalytic arginine), member b | Protein-tyrosine phosphatase-like member B [Source:UniProtKB/Swiss-Prot;Acc:Q6Y1H2] [ENST00000383657]            | 2.01453 | down | 1.97814 | down | 591.13860   | 1233.09100  | 549.09070   | 957.78100   | Detected    | Detected | Detected    | Detected    |
| 7026 | A_23_P2573    | TMEM117      | Hs.444668 | transmembrane protein 117                                                           | Homo sapiens transmembrane protein 117 (TMEM117), mRNA [NM_032256]                                               | 2.01441 | down | 2.05795 | down | 716.17865   | 1493.83060  | 589.09766   | 1069.02610  | Detected    | Detected | Detected    | Detected    |
| 7027 | A_23_P47857   | TM7SF3       | Hs.438641 | transmembrane 7 superfamily member 3                                                | Homo sapiens transmembrane 7 superfamily member 3 (TM7SF3), mRNA [NM_016551]                                     | 2.01422 | down | 2.17344 | down | 1652.83640  | 3447.23410  | 1171.13850  | 2244.50440  | Detected    | Detected | Detected    | Detected    |
| 7028 | A_23_P121326  | CYB561D2     | Hs.149443 | cytochrome b-561 domain containing 2                                                | Homo sapiens cytochrome b-561 domain containing 2 (CYB561D2), mRNA [NM_007022]                                   | 2.01406 | down | 2.03498 | down | 1116.21200  | 2327.83860  | 1315.19420  | 2360.01680  | Detected    | Detected | Detected    | Detected    |
| 7029 | A_33_P3342822 | LOC100132672 | Hs.648146 | similar to glycosyltransferase 8 domain containing 3                                | PREDICTED: Homo sapiens similar to glycosyltransferase 8 domain containing 3 (LOC100132672), miscRNA [XR_038504] | 2.01391 | down | 1.32195 | down | 34.62092    | 72.19582    | 24.67194    | 28.75968    | Detected    | Detected | Detected    | Detected    |

|      |               |              |           |                                                                           |                                                                                                                    |         |      |         |      |             |              |             |             |             |          |             |             |
|------|---------------|--------------|-----------|---------------------------------------------------------------------------|--------------------------------------------------------------------------------------------------------------------|---------|------|---------|------|-------------|--------------|-------------|-------------|-------------|----------|-------------|-------------|
| 7030 | A_33_P3367102 | C1orf152     | Hs.632440 | profilin 1 pseudogene                                                     | Homo sapiens chromosome 1 open reading frame 152 (C1orf152), non-coding RNA [NR_003242]                            | 2.01311 | down | 2.23680 | down | 4978.56800  | 10377.78100  | 5833.32700  | 11505.60600 | Detected    | Detected | Detected    | Detected    |
| 7031 | A_24_P902728  | CAPRN1       | Hs.471818 | cell cycle associated protein 1                                           | Homo sapiens cell cycle associated protein 1 (CAPRN1), transcript variant 2, mRNA [NM_203364]                      | 2.01295 | down | 1.86206 | down | 205.53264   | 428.39783    | 128.12813   | 210.37984   | Detected    | Detected | Detected    | Detected    |
| 7032 | A_33_P3355468 | LOC100128006 | Hs.639848 | hypothetical protein LOC100128006                                         | PREDICTED: Homo sapiens hypothetical protein LOC100128006 (LOC100128006), miscRNA [XR_078832]                      | 2.01260 | down | 3.17585 | down | 13.30448    | 27.72614     | 3.16421     | 8.86118     | Compromised | Detected | Compromised | Compromised |
| 7033 | A_32_P57728   | PMS2L1       | Hs.634244 | postmeiotic segregation increased 2-like 1 pseudogene                     | Homo sapiens postmeiotic segregation increased 2-like 1 pseudogene (PMS2L1), non-coding RNA [NR_003613]            | 2.01240 | down | 2.03962 | down | 979.58545   | 2041.22060   | 1018.59705  | 1831.96740  | Detected    | Detected | Detected    | Detected    |
| 7034 | A_33_P3297415 | NRP2         | Hs.471200 | neuropilin 2                                                              | Homo sapiens neuropilin 2 (NRP2), transcript variant 6, mRNA [NM_201264]                                           | 2.01238 | down | 2.91755 | down | 54.19402    | 112.92638    | 33.03511    | 84.98840    | Detected    | Detected | Detected    | Detected    |
| 7035 | A_23_P42802   | PDIA4        | Hs.93659  | protein disulfide isomerase family A, member 4                            | Homo sapiens protein disulfide isomerase family A, member 4 (PDIA4), mRNA [NM_004911]                              | 2.01229 | down | 2.11636 | down | 3564.43000  | 7427.01760   | 2869.52860  | 5355.06450  | Detected    | Detected | Detected    | Detected    |
| 7036 | A_33_P3288942 | FAM107B      | Hs.446315 | family with sequence similarity 107, member B                             | Homo sapiens family with sequence similarity 107, member B (FAM107B), mRNA [NM_031453]                             | 2.01173 | down | 1.95790 | down | 253.25677   | 527.55010    | 328.20877   | 566.63745   | Detected    | Detected | Detected    | Detected    |
| 7037 | A_23_P4919    | KDELRL1      | Hs.515515 | KDEL (Lys-Asp-Glu-Leu) endoplasmic reticulum protein retention receptor 1 | Homo sapiens KDEL (Lys-Asp-Glu-Leu) endoplasmic reticulum protein retention receptor 1 (KDELRL1), mRNA [NM_006801] | 2.01120 | down | 1.90030 | down | 3369.74760  | 7017.56300   | 2952.00830  | 4946.59030  | Detected    | Detected | Detected    | Detected    |
| 7038 | A_33_P3307660 | KLHDC4       | Hs.720662 | kelch domain containing 4                                                 | Homo sapiens kelch domain containing 4 (KLHDC4), mRNA [NM_017566]                                                  | 2.01097 | down | 2.19957 | down | 429.09930   | 893.50340    | 424.72714   | 823.78546   | Detected    | Detected | Detected    | Detected    |
| 7039 | A_23_P301476  | C3orf33      | Hs.350846 | chromosome 3 open reading frame 33                                        | Homo sapiens chromosome 3 open reading frame 33 (C3orf33), mRNA [NM_173857]                                        | 2.01049 | down | 2.12117 | down | 121.97010   | 253.91463    | 94.83508    | 177.38208   | Detected    | Detected | Detected    | Detected    |
| 7040 | A_23_P393080  | CALML3       | Hs.239600 | calmodulin-like 3                                                         | Homo sapiens calmodulin-like 3 (CALML3), mRNA [NM_005185]                                                          | 2.01038 | down | 2.37997 | down | 961.73480   | 2002.00890   | 465.37082   | 976.64355   | Detected    | Detected | Detected    | Detected    |
| 7041 | A_23_P96899   | PGLYRP3      | Hs.348266 | peptidoglycan recognition protein 3                                       | Homo sapiens peptidoglycan recognition protein 3 (PGLYRP3), mRNA [NM_052891]                                       | 2.01021 | down | 1.73647 | down | 12.41545    | 25.84263     | 4.66881     | 7.14891     | Compromised | Detected | Compromised | Compromised |
| 7042 | A_33_P3340666 | KRTAP19-5    | Hs.553694 | keratin associated protein 19-5                                           | Homo sapiens keratin associated protein 19-5 (KRTAP19-5), mRNA [NM_181611]                                         | 2.01003 | down | 2.11617 | down | 641.18054   | 1334.49410   | 394.21295   | 735.60724   | Detected    | Detected | Detected    | Detected    |
| 7043 | A_33_P3208970 | ZNF683       | Hs.353208 | zinc finger protein 683                                                   | Homo sapiens zinc finger protein 683 (ZNF683), transcript variant 1, mRNA [NM_00114759]                            | 2.00997 | down | 1.26594 | down | 17.02000    | 35.42273     | 19.52790    | 21.79890    | Detected    | Detected | Detected    | Detected    |
| 7044 | A_33_P3223980 | TPM3         | Hs.644306 | tropomyosin 3                                                             | Homo sapiens tropomyosin 3 (TPM3), transcript variant 3, mRNA [NM_001043352]                                       | 2.00904 | down | 2.14250 | down | 3614.43950  | 7519.04250   | 3503.39530  | 6618.74850  | Detected    | Detected | Detected    | Detected    |
| 7045 | A_23_P317324  | MECOM        | Hs.656395 | MDS1 and EVI1 complex locus                                               | Homo sapiens MDS1 and EVI1 complex locus (MECOM), transcript variant 2, mRNA [NM_005241]                           | 2.00895 | down | 1.96986 | down | 70.37395    | 146.39111    | 48.89269    | 84.92685    | Detected    | Detected | Detected    | Detected    |
| 7046 | A_23_P115190  | NGF          | Hs.2561   | nerve growth factor (beta polypeptide)                                    | Homo sapiens nerve growth factor (beta polypeptide) (NGF), mRNA [NM_002506]                                        | 2.00886 | down | 2.32824 | down | 12.46426    | 25.92683     | 12.23672    | 25.12226    | Compromised | Detected | Compromised | Detected    |
| 7047 | A_33_P3267502 | ANKRD16      | Hs.289828 | ankyrin repeat domain 16                                                  | Homo sapiens ankyrin repeat domain 16 (ANKRD16), transcript variant 2, mRNA [NM_001009941]                         | 2.00862 | down | 2.13524 | down | 2312.42820  | 4809.49700   | 2076.30960  | 3909.34080  | Detected    | Detected | Detected    | Detected    |
| 7048 | A_33_P3244369 | LOC100132672 | Hs.648146 | similar to glycosyltransferase 8 domain containing 3                      | PREDICTED: Homo sapiens similar to glycosyltransferase 8 domain containing 3 (LOC100132672), miscRNA [XR_038504]   | 2.00846 | down | 2.10835 | down | 39.96475    | 83.11401     | 16.81464    | 31.26050    | Detected    | Detected | Detected    | Detected    |
| 7049 | A_33_P3285271 | FMO6P        | Hs.448988 | flavin containing monooxygenase 6 pseudogene                              | Homo sapiens flavin containing monooxygenase 6 pseudogene (FMO6P), non-coding RNA [NR_002601]                      | 2.00844 | down | 1.81282 | down | 398.57178   | 828.89386    | 18.56729    | 29.68035    | Detected    | Detected | Detected    | Detected    |
| 7050 | A_23_P148546  | ARD1A        | Hs.433291 | ARD1 homolog A, N-acetyltransferase (S. cerevisiae)                       | Homo sapiens ARD1 homolog A, N-acetyltransferase (S. cerevisiae) (ARD1A), mRNA [NM_003491]                         | 2.00719 | down | 2.05254 | down | 2095.45200  | 4355.11500   | 2023.77330  | 3662.84500  | Detected    | Detected | Detected    | Detected    |
| 7051 | A_23_P112016  | DLC1         | Hs.720057 | deleted in liver cancer 1                                                 | Homo sapiens deleted in liver cancer 1 (DLC1), transcript variant 3, mRNA [NM_024767]                              | 2.00677 | down | 1.59258 | down | 23.31969    | 48.45659     | 18.30392    | 25.70453    | Detected    | Detected | Detected    | Detected    |
| 7052 | A_23_P108751  | FHL2         | Hs.443687 | four and a half LIM domains 2                                             | Homo sapiens four and a half LIM domains 2 (FHL2), transcript variant 5, mRNA [NM_001039492]                       | 2.00666 | down | 2.07201 | down | 56261.91400 | 116901.68000 | 46107.32000 | 84241.62000 | Detected    | Detected | Detected    | Detected    |
| 7053 | A_33_P3221353 | KIAA0564     | Hs.368282 | KIAA0564                                                                  | Homo sapiens KIAA0564 (KIAA0564), transcript variant 2, mRNA [NM_001009914]                                        | 2.00565 | down | 1.48149 | down | 25.69818    | 53.36924     | 29.13800    | 38.06493    | Detected    | Detected | Detected    | Detected    |
| 7054 | A_33_P3594214 | OR7E104P     | Hs.568153 | olfactory receptor, family 7, subfamily E, member 104 pseudogene          | Homo sapiens mRNA: cDNA DKFZp434K1831 (from clone DKFZp434K1831) [AL137719]                                        | 2.00544 | down | 2.36745 | down | 98.66640    | 204.89545    | 87.15251    | 181.93916   | Detected    | Detected | Detected    | Detected    |
| 7055 | A_33_P3266396 | GLTPD1       | Hs.515689 | glycolipid transfer protein domain containing 1                           | Homo sapiens glycolipid transfer protein domain containing 1 (GLTPD1), mRNA [NM_001029885]                         | 2.00529 | down | 2.03162 | down | 6879.63570  | 14284.83300  | 5166.14100  | 9254.96700  | Detected    | Detected | Detected    | Detected    |
| 7056 | A_23_P94301   | TSTA3        | Hs.404119 | tissue specific transplantation antigen P35B                              | Homo sapiens tissue specific transplantation antigen P35B (TSTA3), mRNA [NM_003313]                                | 2.00520 | down | 2.09826 | down | 880.09890   | 1827.34840   | 957.32840   | 1771.27580  | Detected    | Detected | Detected    | Detected    |
| 7057 | A_33_P3371219 | SDC2         | Hs.1501   | syndecan 2                                                                | Homo sapiens syndecan 2 (SDC2), mRNA [NM_002998]                                                                   | 2.00508 | down | 2.11358 | down | 44.12290    | 91.60685     | 23.41175    | 43.63336    | Detected    | Detected | Detected    | Detected    |
| 7058 | A_33_P3341901 | TSR2         | Hs.522662 | TSR2, 20S rRNA accumulation, homolog (S. cerevisiae)                      | Homo sapiens TSR2, 20S rRNA accumulation, homolog (S. cerevisiae) (TSR2), mRNA [NM_058163]                         | 2.00469 | down | 2.10682 | down | 3092.72050  | 6419.79540   | 2268.96200  | 4215.22000  | Detected    | Detected | Detected    | Detected    |
| 7059 | A_23_P53152   | C11orf17     | Hs.131180 | chromosome 11 open reading frame 17                                       | Homo sapiens chromosome 11 open reading frame 17 (C11orf17), transcript variant 1, mRNA [NM_182901]                | 2.00457 | down | 1.79574 | down | 1424.83460  | 2957.45200   | 1495.85620  | 2368.63920  | Detected    | Detected | Detected    | Detected    |

|      |               |              |           |                                                                |                                                                                                                                                 |         |      |          |      |             |              |             |             |             |             |             |          |
|------|---------------|--------------|-----------|----------------------------------------------------------------|-------------------------------------------------------------------------------------------------------------------------------------------------|---------|------|----------|------|-------------|--------------|-------------|-------------|-------------|-------------|-------------|----------|
| 7060 | A_23_P29555   | SEC13        | Hs.166924 | SEC13 homolog (S. cerevisiae)                                  | Homo sapiens SEC13 homolog (S. cerevisiae) (SEC13), transcript variant 1, mRNA [NM_183352]                                                      | 2.00452 | down | 1.86208  | down | 57397.55000 | 119134.54000 | 38548.10000 | 63294.68400 | Detected    | Detected    | Detected    | Detected |
| 7061 | A_23_P69188   | DPH3         | Hs.388087 | DPH3, KTI11 homolog (S. cerevisiae)                            | Homo sapiens DPH3, KTI11 homolog (S. cerevisiae) (DPH3), transcript variant 1, mRNA [NM_206831]                                                 | 2.00415 | down | 1.88567  | down | 2719.44360  | 5643.43000   | 2013.99770  | 3348.81180  | Detected    | Detected    | Detected    | Detected |
| 7062 | A_23_P215900  | SCARA3       | Hs.128856 | scavenger receptor class A, member 3                           | Homo sapiens scavenger receptor class A, member 3 (SCARA3), transcript variant 1, mRNA [NM_016240]                                              | 2.00306 | down | 2.27780  | down | 3759.29520  | 7797.09700   | 4154.59900  | 8344.67400  | Detected    | Detected    | Detected    | Detected |
| 7063 | A_23_P88303   | HSPA2        | Hs.432648 | heat shock 70kDa protein 2                                     | Homo sapiens heat shock 70kDa protein 2 (HSPA2), mRNA [NM_021979]                                                                               | 2.00262 | down | 1.90283  | down | 458.49440   | 950.74634    | 412.03595   | 691.35315   | Detected    | Detected    | Detected    | Detected |
| 7064 | A_23_P63798   | KLF6         | Hs.4055   | Kruppel-like factor 6                                          | Homo sapiens Kruppel-like factor 6 (KLF6), transcript variant A, mRNA [NM_001300]                                                               | 2.00246 | down | 1.86118  | down | 39329.15000 | 81547.52000  | 24657.90600 | 40467.89000 | Detected    | Detected    | Detected    | Detected |
| 7065 | A_33_P3216994 | HERC4        | Hs.51891  | hect domain and RLD 4                                          | Homo sapiens hect domain and RLD 4 (HERC4), transcript variant 2, mRNA [NM_015601]                                                              | 2.00185 | down | 2.02625  | down | 63.56657    | 131.76300    | 61.54115    | 109.95721   | Detected    | Detected    | Detected    | Detected |
| 7066 | A_23_P157215  | BZW2         | Hs.487635 | basic leucine zipper and W2 domains 2                          | Homo sapiens basic leucine zipper and W2 domains 2 (BZW2), transcript variant 2, mRNA [NM_014038]                                               | 2.00134 | down | 2.11756  | down | 8925.14100  | 18495.64600  | 7269.31800  | 13573.58000 | Detected    | Detected    | Detected    | Detected |
| 7067 | A_33_P3371514 | IPPK         | Hs.459896 | inositol 1,3,4,5,6-pentakisphosphate 2-kinase                  | Homo sapiens inositol 1,3,4,5,6-pentakisphosphate 2-kinase (IPPK), mRNA [NM_022755]                                                             | 2.00112 | down | 1.88971  | down | 231.16832   | 478.99847    | 223.43190   | 372.31122   | Detected    | Detected    | Detected    | Detected |
| 7068 | A_33_P3289845 | IGFL1        | Hs.546554 | IGF-like family member 1                                       | Homo sapiens IGF-like family member 1 (IGFL1), mRNA [NM_198541]                                                                                 | 2.00065 | down | 1.15328  | down | 12.78748    | 26.49041     | 77.57638    | 78.89124    | Compromised | Detected    | Detected    | Detected |
| 7069 | A_33_P3350728 | FARP2        | Hs.657318 | FERM, RhoGEF and pleckstrin domain protein 2                   | Homo sapiens FERM, RhoGEF and pleckstrin domain protein 2 (FARP2), mRNA [NM_014808]                                                             | 2.00063 | down | 2.26377  | down | 65.13287    | 134.92760    | 72.38910    | 144.50087   | Detected    | Detected    | Detected    | Detected |
| 7070 | A_23_P258814  | DPH3B        | Hs.126248 | DPH3B, KTI11 homolog B (S. cerevisiae)                         | Homo sapiens DPH3B, KTI11 homolog B (S. cerevisiae) (DPH3B), mRNA [NM_080750]                                                                   | 2.00025 | down | 1.91914  | down | 480.03880   | 994.24695    | 487.73367   | 825.38306   | Detected    | Detected    | Detected    | Detected |
| 7071 | A_33_P3783812 | C8orf60      |           | chromosome 8 open reading frame 60                             | Homo sapiens cDNA FLJ12193 fis. clone MAMMA1000856, [AK022255]                                                                                  | 1.99972 | down | 2.18822  | down | 90.11311    | 186.59093    | 46.03883    | 88.83424    | Detected    | Detected    | Detected    | Detected |
| 7072 | A_33_P3246927 |              | Hs.656915 |                                                                | CUB and sushi domain-containing protein 2 (CUB and sushi multiple domains protein 2) [Source:UniProtKB/Swiss-Prot;Acc:Q7Z408] [ENST00000373377] | 1.99929 | down | 2.06177  | down | 24.92211    | 51.59345     | 27.24453    | 49.53201    | Detected    | Detected    | Detected    | Detected |
| 7073 | A_33_P3412149 | CLCC1        | Hs.658489 | chloride channel CLIC-like 1                                   | Homo sapiens chloride channel CLIC-like 1 (CLCC1), transcript variant 1, mRNA [NM_001048210]                                                    | 1.99863 | down | 2.28300  | down | 670.57263   | 1387.74900   | 812.03796   | 1634.73910  | Detected    | Detected    | Detected    | Detected |
| 7074 | A_24_P740620  | LOC197350    |           | hypothetical protein LOC197350                                 | PREDICTED: Homo sapiens hypothetical protein LOC197350 (LOC197350), mRNA [XM_001715723]                                                         | 1.99812 | down | 13.23124 | down | 2.88660     | 5.97228      | 3.21082     | 37.46118    | Compromised | Compromised | Compromised | Detected |
| 7075 | A_23_P52647   | EHD1         | Hs.523774 | EH-domain containing 1                                         | Homo sapiens EH-domain containing 1 (EHD1), mRNA [NM_006795]                                                                                    | 1.99647 | down | 2.09412  | down | 8975.73200  | 18555.16200  | 9501.88400  | 17545.91200 | Detected    | Detected    | Detected    | Detected |
| 7076 | A_24_P262738  | DDA1         | Hs.466154 | DET1 and DDB1 associated 1                                     | Homo sapiens DET1 and DDB1 associated 1 (DDA1), mRNA [NM_024050]                                                                                | 1.99535 | down | 2.17448  | down | 478.37700   | 988.37490    | 533.19495   | 1022.36725  | Detected    | Detected    | Detected    | Detected |
| 7077 | A_23_P149876  | ABCA3        | Hs.26630  | ATP-binding cassette, sub-family A (ABC1), member 3            | Homo sapiens ATP-binding cassette, sub-family A (ABC1), member 3 (ABCA3), mRNA [NM_001089]                                                      | 1.99516 | down | 2.10580  | down | 16.41137    | 33.90437     | 14.75518    | 27.39854    | Detected    | Detected    | Detected    | Detected |
| 7078 | A_23_P149494  | ABHD12       | Hs.441550 | abhydrolase domain containing 12                               | Homo sapiens abhydrolase domain containing 12 (ABHD12), transcript variant 2, mRNA [NM_015600]                                                  | 1.99342 | down | 2.40735  | down | 538.11285   | 1110.72410   | 517.55994   | 1098.66420  | Detected    | Detected    | Detected    | Detected |
| 7079 | A_23_P43800   | BOP1         | Hs.645279 | block of proliferation 1                                       | Homo sapiens block of proliferation 1 (BOP1), mRNA [NM_015201]                                                                                  | 1.99271 | down | 2.26288  | down | 3558.04570  | 7341.57600   | 3672.80760  | 7328.65900  | Detected    | Detected    | Detected    | Detected |
| 7080 | A_24_P98975   | ANKRD13A     | Hs.528703 | ankyrin repeat domain 13A                                      | Homo sapiens ankyrin repeat domain 13A (ANKRD13A), mRNA [NM_033121]                                                                             | 1.99263 | down | 2.00018  | down | 2979.91940  | 6148.44240   | 2111.07640  | 3723.39230  | Detected    | Detected    | Detected    | Detected |
| 7081 | A_23_P368886  | CHSY3        | Hs.213137 | chondroitin sulfate synthase 3                                 | Homo sapiens chondroitin sulfate synthase 3 (CHSY3), mRNA [NM_175856]                                                                           | 1.99227 | down | 2.09005  | down | 104.33508   | 215.23427    | 104.58291   | 192.74524   | Detected    | Detected    | Detected    | Detected |
| 7082 | A_33_P3270451 | TXNDC5       | Hs.150837 | thioredoxin domain containing 5 (endoplasmic reticulum)        | Homo sapiens thioredoxin domain containing 5 (endoplasmic reticulum) (TXNDC5), transcript variant 1, mRNA [NM_030810]                           | 1.99128 | down | 2.06515  | down | 1888.26670  | 3893.40040   | 1849.99650  | 3368.90580  | Detected    | Detected    | Detected    | Detected |
| 7083 | A_33_P3299435 | SART1        | Hs.502883 | squamous cell carcinoma antigen recognized by T cells          | Homo sapiens squamous cell carcinoma antigen recognized by T cells (SART1), mRNA [NM_005146]                                                    | 1.98886 | down | 2.75999  | down | 130.41031   | 268.56528    | 89.54284    | 217.92377   | Detected    | Detected    | Detected    | Detected |
| 7084 | A_32_P84454   | LOC100129794 | Hs.651384 | similar to hCG1804255                                          | PREDICTED: Homo sapiens similar to hCG1804255 (LOC100129794), mRNA [XM_001721688]                                                               | 1.98803 | down | 2.02870  | down | 21.64382    | 44.55423     | 12.96854    | 23.19933    | Detected    | Detected    | Detected    | Detected |
| 7085 | A_32_P52816   | TM7SF3       | Hs.438641 | transmembrane 7 superfamily member 3                           | Homo sapiens transmembrane 7 superfamily member 3 (TM7SF3), mRNA [NM_016551]                                                                    | 1.98755 | down | 2.16151  | down | 213.72850   | 439.85895    | 131.82759   | 251.26300   | Detected    | Detected    | Detected    | Detected |
| 7086 | A_23_P32454   | TG           | Hs.654591 | thyroglobulin                                                  | Homo sapiens thyroglobulin (TG), mRNA [NM_003235]                                                                                               | 1.98733 | down | 2.35271  | down | 82.45951    | 169.68474    | 61.02495    | 126.60231   | Detected    | Detected    | Detected    | Detected |
| 7087 | A_23_P65518   | DACT1        | Hs.48950  | dapper, antagonist of beta-catenin, homolog 1 (Xenopus laevis) | Homo sapiens dapper, antagonist of beta-catenin, homolog 1 (Xenopus laevis) (DACT1), transcript variant 1, mRNA [NM_016651]                     | 1.98700 | down | 2.17042  | down | 588.92285   | 1211.68410   | 383.44257   | 733.85490   | Detected    | Detected    | Detected    | Detected |
| 7088 | A_33_P3325229 |              | Hs.535995 |                                                                | Novel proteinHCG1981372, isoform CRA_cPutative uncharacterized protein ENSP00000370498 ; [Source:UniProtKB/TrEMBL;Acc:A8MSK0] [ENST00000381109] | 1.98476 | down | 2.48023  | down | 86.48792    | 177.74472    | 79.53285    | 173.94199   | Detected    | Detected    | Detected    | Detected |
| 7089 | A_33_P3280009 |              |           |                                                                |                                                                                                                                                 | 1.98305 | down | 2.02387  | down | 43.28673    | 88.88355     | 35.08458    | 62.61284    | Detected    | Detected    | Detected    | Detected |
| 7090 | A_23_P314086  | RNF126       | Hs.69554  | ring finger protein 126                                        | Homo sapiens ring finger protein 126 (RNF126), mRNA [NM_194460]                                                                                 | 1.98176 | down | 2.08043  | down | 17985.90000 | 36907.59000  | 14195.36900 | 26041.46300 | Detected    | Detected    | Detected    | Detected |

|      |               |           |           |                                                                     |                                                                                                                                                                                                     |         |      |         |      |              |              |              |              |             |          |             |             |
|------|---------------|-----------|-----------|---------------------------------------------------------------------|-----------------------------------------------------------------------------------------------------------------------------------------------------------------------------------------------------|---------|------|---------|------|--------------|--------------|--------------|--------------|-------------|----------|-------------|-------------|
| 7091 | A_24_P238131  | SUSD5     | Hs.196647 | sushi domain containing 5                                           | Homo sapiens sushi domain containing 5 (SUSD5), mRNA [NM_015551]                                                                                                                                    | 1.98111 | down | 2.18932 | down | 64.05328     | 131.39621    | 70.96616     | 137.00189    | Detected    | Detected | Detected    | Detected    |
| 7092 | A_23_P374902  | CLDN2     | Hs.720536 | claudin domain containing 2                                         | Homo sapiens claudin domain containing 2 (CLDN2), mRNA [NM_152353]                                                                                                                                  | 1.98094 | down | 4.08528 | down | 20.31547     | 41.67067     | 8.64128      | 31.12904     | Detected    | Detected | Compromised | Detected    |
| 7093 | A_23_P50000   | FAM57A    | Hs.154396 | family with sequence similarity 57, member A                        | Homo sapiens family with sequence similarity 57, member A (FAM57A), mRNA [NM_024792]                                                                                                                | 1.98056 | down | 2.08830 | down | 3250.95500   | 6667.03400   | 3712.48750   | 6836.33800   | Detected    | Detected | Detected    | Detected    |
| 7094 | A_23_P135326  | POLE3     | Hs.108112 | polymerase (DNA directed), epsilon 3 (p17 subunit)                  | Homo sapiens polymerase (DNA directed), epsilon 3 (p17 subunit) (POLE3), mRNA [NM_017443]                                                                                                           | 1.98048 | down | 2.02582 | down | 3605.98660   | 7394.83150   | 3325.01980   | 5939.65100   | Detected    | Detected | Detected    | Detected    |
| 7095 | A_23_P357101  | APOBEC3F  | Hs.659809 | apolipoprotein B mRNA editing enzyme, catalytic polypeptide-like 3F | Homo sapiens apolipoprotein B mRNA editing enzyme, catalytic polypeptide-like 3F (APOBEC3F), transcript variant 1, mRNA [NM_145298]                                                                 | 1.97956 | down | 2.59882 | down | 238.58409    | 489.03827    | 179.26517    | 410.80750    | Detected    | Detected | Detected    | Detected    |
| 7096 | A_23_P386241  | FAM110A   | Hs.574822 | family with sequence similarity 110, member A                       | Homo sapiens family with sequence similarity 110, member A (FAM110A), transcript variant 3, mRNA [NM_001042353]                                                                                     | 1.97839 | down | 2.08569 | down | 2813.47700   | 5763.52540   | 2541.77000   | 4674.67400   | Detected    | Detected | Detected    | Detected    |
| 7097 | A_23_P206077  | AEN       | Hs.436102 | apoptosis enhancing nuclease                                        | Homo sapiens apoptosis enhancing nuclease (AEN), mRNA [NM_022767]                                                                                                                                   | 1.97819 | down | 2.04943 | down | 916.62573    | 1877.56130   | 563.23060    | 1017.85400   | Detected    | Detected | Detected    | Detected    |
| 7098 | A_33_P3763412 | tcag7.929 | Hs.667624 | hypothetical protein LOC286009                                      | Homo sapiens cDNA FLJ40109 fis. clone TEST12007685 [AK097428]                                                                                                                                       | 1.97794 | down | 3.21925 | down | 7.39645      | 15.14851     | 2.33642      | 6.63240      | Compromised | Detected | Compromised | Compromised |
| 7099 | A_33_P3233560 |           |           |                                                                     | Uroporphyrinogen-III synthase (UROIII)(UROS)(EC 4.2.1.75)(Hydroxymethylbilane hydrolyase [cyclizing])(Uroporphyrinogen-III cosynthetase) [Source:UniProtKB/Swiss-Prot;Acc:P10746] [ENST00000368774] | 1.97791 | down | 2.58165 | down | 39.01874     | 79.91221     | 21.48196     | 48.90305     | Detected    | Detected | Detected    | Detected    |
| 7100 | A_24_P151582  | TEF       | Hs.181159 | thyrotrophic embryonic factor                                       | Homo sapiens thyrotrophic embryonic factor (TEF), transcript variant 1, mRNA [NM_003216]                                                                                                            | 1.97732 | down | 2.13867 | down | 529.30710    | 1083.72240   | 405.13104    | 764.02170    | Detected    | Detected | Detected    | Detected    |
| 7101 | A_32_P76627   |           | Hs.546903 |                                                                     | full-length cDNA clone CSODID13YN06 of Placenta Cot 25-normalized of Homo sapiens (human) [CR959757]                                                                                                | 1.97631 | down | 2.45257 | down | 17.77038     | 36.36503     | 17.56453     | 37.98599     | Detected    | Detected | Detected    | Detected    |
| 7102 | A_32_P45738   | PGAM1     | Hs.632918 | phosphoglycerate mutase 1 (brain)                                   | Homo sapiens phosphoglycerate mutase 1 (brain) (PGAM1), mRNA [NM_002629]                                                                                                                            | 1.97586 | down | 2.04930 | down | 20040.73000  | 41001.88000  | 14948.06300  | 27012.01200  | Detected    | Detected | Detected    | Detected    |
| 7103 | A_33_P3353502 | PLCB4     | Hs.472101 | phospholipase C, beta 4                                             | Homo sapiens phospholipase C, beta 4 (PLCB4), transcript variant 2, mRNA [NM_182797]                                                                                                                | 1.97542 | down | 2.18834 | down | 98.23375     | 200.93408    | 66.35543     | 128.04353    | Detected    | Detected | Detected    | Detected    |
| 7104 | A_24_P33156   | AFMID     | Hs.558614 | arylformamidase                                                     | Homo sapiens arylformamidase (AFMID), transcript variant 1, mRNA [NM_001010982]                                                                                                                     | 1.97521 | down | 2.24104 | down | 67.36563     | 137.77940    | 67.54495     | 133.47720    | Detected    | Detected | Detected    | Detected    |
| 7105 | A_23_P140029  | UBL3      | Hs.145575 | ubiquitin-like 3                                                    | Homo sapiens ubiquitin-like 3 (UBL3), mRNA [NM_007106]                                                                                                                                              | 1.97441 | down | 2.07450 | down | 700.54110    | 1432.20300   | 418.34448    | 765.26560    | Detected    | Detected | Detected    | Detected    |
| 7106 | A_23_P54816   | ATP6VOC   | Hs.389107 | ATPase, H+ transporting, lysosomal 16kDa, V0 subunit c              | Homo sapiens ATPase, H+ transporting, lysosomal 16kDa, V0 subunit c (ATP6VOC), mRNA [NM_001694]                                                                                                     | 1.97387 | down | 2.13306 | down | 67706.49000  | 138382.53000 | 63154.00400  | 118786.96000 | Detected    | Detected | Detected    | Detected    |
| 7107 | A_23_P99076   | PRH2      | Hs.631731 | proline-rich protein HaeIII subfamily 2                             | Homo sapiens proline-rich protein HaeIII subfamily 2 (PRH2), transcript variant 1, mRNA [NM_005042]                                                                                                 | 1.97326 | down | 2.30228 | down | 51.39911     | 105.02033    | 57.06145     | 115.84228    | Detected    | Detected | Detected    | Detected    |
| 7108 | A_33_P3228642 |           | Hs.439551 |                                                                     | Zinc finger protein 584 [Source:UniProtKB/Swiss-Prot;Acc:Q8IVC4] [ENST00000322834]                                                                                                                  | 1.97304 | down | 2.30725 | down | 179.23140    | 366.16953    | 132.08090    | 268.72030    | Detected    | Detected | Detected    | Detected    |
| 7109 | A_33_P3329240 |           | Hs.590653 |                                                                     | 602362704F1 NIH_MGC_90 Homo sapiens cDNA clone IMAGE4470960 5', mRNA sequence [BG250529]                                                                                                            | 1.97298 | down | 2.40881 | down | 272.22943    | 556.14750    | 189.22760    | 401.93274    | Detected    | Detected | Detected    | Detected    |
| 7110 | A_33_P3278920 | TARDBP    | Hs.300624 | TAR DNA binding protein                                             | Homo sapiens TAR DNA binding protein (TARDBP), mRNA [NM_007375]                                                                                                                                     | 1.97213 | down | 2.06142 | down | 209.35602    | 427.51746    | 117.70087    | 213.94957    | Detected    | Detected | Detected    | Detected    |
| 7111 | A_32_P191084  | KCTD5     | Hs.61960  | potassium channel tetramerisation domain containing 5               | Homo sapiens potassium channel tetramerisation domain containing 5 (KCTD5), mRNA [NM_018992]                                                                                                        | 1.97120 | down | 2.11079 | down | 2365.04370   | 4827.28600   | 2278.54660   | 4241.00340   | Detected    | Detected | Detected    | Detected    |
| 7112 | A_23_P59418   | NRF1      | Hs.654363 | nuclear respiratory factor 1                                        | Homo sapiens nuclear respiratory factor 1 (NRF1), transcript variant 1, mRNA [NM_005011]                                                                                                            | 1.97069 | down | 2.22809 | down | 94.79867     | 193.44331    | 80.19270     | 157.55557    | Detected    | Detected | Detected    | Detected    |
| 7113 | A_23_P63281   | GLTPD1    | Hs.515689 | glycolipid transfer protein domain containing 1                     | Homo sapiens glycolipid transfer protein domain containing 1 (GLTPD1), mRNA [NM_001029885]                                                                                                          | 1.97059 | down | 2.18902 | down | 344.73070    | 703.41296    | 392.00778    | 756.67600    | Detected    | Detected | Detected    | Detected    |
| 7114 | A_23_P144054  | PRKCD     | Hs.155342 | protein kinase C, delta                                             | Homo sapiens protein kinase C, delta (PRKCD), transcript variant 1, mRNA [NM_006254]                                                                                                                | 1.96927 | down | 2.15289 | down | 1719.02700   | 3505.25780   | 1530.27330   | 2905.06840   | Detected    | Detected | Detected    | Detected    |
| 7115 | A_23_P141863  | ZNF544    | Hs.438994 | zinc finger protein 544                                             | Homo sapiens zinc finger protein 544 (ZNF544), mRNA [NM_014480]                                                                                                                                     | 1.96901 | down | 2.14952 | down | 188.42418    | 384.16513    | 145.65422    | 276.07750    | Detected    | Detected | Detected    | Detected    |
| 7116 | A_23_P254271  | TUBB6     | Hs.720070 | tubulin, beta 6                                                     | Homo sapiens tubulin, beta 6 (TUBB6), mRNA [NM_032525]                                                                                                                                              | 1.96894 | down | 2.04804 | down | 163651.66000 | 333645.75000 | 122803.20000 | 221775.34000 | Detected    | Detected | Detected    | Detected    |
| 7117 | A_23_P301995  | LIN9      | Hs.120817 | lin-9 homolog (C. elegans)                                          | Homo sapiens lin-9 homolog (C. elegans) (LIN9), mRNA [NM_173083]                                                                                                                                    | 1.96857 | down | 2.83606 | down | 501.96740    | 1023.19885   | 68.34199     | 170.91031    | Detected    | Detected | Detected    | Detected    |
| 7118 | A_23_P63980   | LRFN4     | Hs.209979 | leucine rich repeat and fibronectin type III domain containing 4    | Homo sapiens leucine rich repeat and fibronectin type III domain containing 4 (LRFN4), mRNA [NM_024036]                                                                                             | 1.96720 | down | 2.20708 | down | 4045.50020   | 8240.48400   | 3829.94400   | 7453.76860   | Detected    | Detected | Detected    | Detected    |
| 7119 | A_33_P3318796 | FSTL3     | Hs.529038 | folliculin-like 3 (secreted glycoprotein)                           | Homo sapiens follistatin-like 3 (secreted glycoprotein) (FSTL3), mRNA [NM_005860]                                                                                                                   | 1.96707 | down | 2.08801 | down | 2487.85280   | 5067.31540   | 2740.60300   | 5045.95600   | Detected    | Detected | Detected    | Detected    |
| 7120 | A_23_P92132   | IFRD2     | Hs.315177 | interferon-related developmental regulator 2                        | Homo sapiens interferon-related developmental regulator 2 (IFRD2), mRNA [NM_006764]                                                                                                                 | 1.96617 | down | 2.33669 | down | 3823.40530   | 7784.02200   | 3403.79250   | 7013.41700   | Detected    | Detected | Detected    | Detected    |

|      |               |              |           |                                                            |                                                                                                                                                                                                                                |         |      |         |      |             |              |             |             |          |          |             |          |
|------|---------------|--------------|-----------|------------------------------------------------------------|--------------------------------------------------------------------------------------------------------------------------------------------------------------------------------------------------------------------------------|---------|------|---------|------|-------------|--------------|-------------|-------------|----------|----------|-------------|----------|
| 7121 | A_24.P213763  |              |           |                                                            | Protein phosphatase 1F (EC 3.1.3.16)(Ca <sup>2+</sup> /calmodulin-dependent protein kinase phosphatase)(CaM-kinase phosphatase)(CaMKPase)(Partner of PIX 2)(hFEM-2) [Source:UniProtKB/Swiss-Prot;Acc:P49593] [ENST00000397495] | 1.96577 | down | 3.32846 | down | 49.74291    | 101.25039    | 23.93867    | 70.26012    | Detected | Detected | Detected    | Detected |
| 7122 | A_24.P256552  | CSTF3        | Hs.44402  | cleavage stimulation factor, 3' pre-RNA, subunit 3, 77kDa  | Homo sapiens cleavage stimulation factor, 3' pre-RNA, subunit 3, 77kDa (CSTF3), transcript variant 2, mRNA [NM_001033505]                                                                                                      | 1.96531 | down | 2.07911 | down | 426.02032   | 866.94980    | 621.37430   | 1139.19060  | Detected | Detected | Detected    | Detected |
| 7123 | A_23.P55828   | CCL25        | Hs.310511 | chemokine (C-C motif) ligand 25                            | Homo sapiens chemokine (C-C motif) ligand 25 (CCL25), mRNA [NM_005624]                                                                                                                                                         | 1.96353 | down | 2.05282 | down | 30.76139    | 62.54273     | 26.30804    | 47.62180    | Detected | Detected | Detected    | Detected |
| 7124 | A_23.P371145  | ADPRHL1      | Hs.98669  | ADP-ribosylhydrolase like 1                                | Homo sapiens ADP-ribosylhydrolase like 1 (ADPRHL1), transcript variant 1, mRNA [NM_138430]                                                                                                                                     | 1.96166 | down | 2.22939 | down | 87.93218    | 178.60947    | 61.74085    | 121.37371   | Detected | Detected | Detected    | Detected |
| 7125 | A_33.P3240053 | UFSP1        | Hs.534845 | UFM1-specific peptidase 1 (non-functional)                 | Homo sapiens UFM1-specific peptidase 1 (non-functional) (UFSP1), mRNA [NM_001015072]                                                                                                                                           | 1.96109 | down | 2.09653 | down | 154.89793   | 314.54092    | 215.01030   | 397.48960   | Detected | Detected | Detected    | Detected |
| 7126 | A_33.P3327500 | UFSP1        | Hs.534845 | UFM1-specific peptidase 1 (non-functional)                 | Homo sapiens UFM1-specific peptidase 1 (non-functional) (UFSP1), mRNA [NM_001015072]                                                                                                                                           | 1.95949 | down | 2.26619 | down | 102.69580   | 208.36705    | 113.16232   | 226.13315   | Detected | Detected | Detected    | Detected |
| 7127 | A_33.P3417195 | C17orf82     | Hs.434459 | chromosome 17 open reading frame 82                        | Homo sapiens chromosome 17 open reading frame 82 (C17orf82), mRNA [NM_203425]                                                                                                                                                  | 1.95939 | down | 2.26145 | down | 572.86380   | 1162.26400   | 546.63055   | 1090.04920  | Detected | Detected | Detected    | Detected |
| 7128 | A_24.P187799  | C7orf58      | Hs.189652 | chromosome 7 open reading frame 58                         | Homo sapiens chromosome 7 open reading frame 58 (C7orf58), transcript variant 1, mRNA [NM_024913]                                                                                                                              | 1.95914 | down | 2.24772 | down | 53.83073    | 109.20142    | 29.21242    | 57.89966    | Detected | Detected | Detected    | Detected |
| 7129 | A_23.P257649  | RBP1         | Hs.529571 | retinol binding protein 1, cellular                        | Homo sapiens retinol binding protein 1, cellular (RBP1), transcript variant 1, mRNA [NM_002899]                                                                                                                                | 1.95859 | down | 4.16834 | down | 16.89369    | 34.26114     | 5.87006     | 21.57604    | Detected | Detected | Compromised | Detected |
| 7130 | A_24.P389916  | LRRC32       | Hs.151641 | leucine rich repeat containing 32                          | Homo sapiens leucine rich repeat containing 32 (LRRC32), transcript variant 1, mRNA [NM_005512]                                                                                                                                | 1.95835 | down | 2.00064 | down | 1187.20250  | 2407.40160   | 1214.05880  | 2141.77400  | Detected | Detected | Detected    | Detected |
| 7131 | A_23.P102832  | CEP250       | Hs.443976 | centrosomal protein 250kDa                                 | Homo sapiens centrosomal protein 250kDa (CEP250), mRNA [NM_007196]                                                                                                                                                             | 1.95813 | down | 2.34835 | down | 562.88740   | 1141.28900   | 523.92190   | 1084.91150  | Detected | Detected | Detected    | Detected |
| 7132 | A_23.P253074  | PIWIL2       | Hs.614809 | piwi-like 2 (Drosophila)                                   | Homo sapiens piwi-like 2 (Drosophila) (PIWIL2), transcript variant 2, mRNA [NM_018068]                                                                                                                                         | 1.95341 | down | 2.46427 | down | 27.68733    | 56.00263     | 17.64961    | 38.35213    | Detected | Detected | Detected    | Detected |
| 7133 | A_23.P2601    | HSP90B1      | Hs.192374 | heat shock protein 90kDa beta (Grp94), member 1            | Homo sapiens heat shock protein 90kDa beta (Grp94), member 1 (HSP90B1), mRNA [NM_003299]                                                                                                                                       | 1.94968 | down | 2.02722 | down | 74395.12500 | 150189.70000 | 53818.43000 | 96205.08000 | Detected | Detected | Detected    | Detected |
| 7134 | A_23.P124024  | MED10        | Hs.13885  | mediator complex subunit 10                                | Homo sapiens mediator complex subunit 10 (MED10), mRNA [NM_032286]                                                                                                                                                             | 1.94854 | down | 2.04768 | down | 1929.77260  | 3893.56790   | 1289.26030  | 2327.91550  | Detected | Detected | Detected    | Detected |
| 7135 | A_23.P361405  | HYAL3        | Hs.129910 | hyaluronoglucosaminidase 3                                 | Homo sapiens hyaluronoglucosaminidase 3 (HYAL3), mRNA [NM_003549]                                                                                                                                                              | 1.94849 | down | 2.07254 | down | 218.66351   | 441.17166    | 252.25253   | 461.00314   | Detected | Detected | Detected    | Detected |
| 7136 | A_23.P123265  | SUMF2        | Hs.279696 | sulfatase modifying factor 2                               | Homo sapiens sulfatase modifying factor 2 (SUMF2), transcript variant 2, mRNA [NM_015411]                                                                                                                                      | 1.94808 | down | 2.01392 | down | 774.89680   | 1563.08530   | 646.99730   | 1148.97450  | Detected | Detected | Detected    | Detected |
| 7137 | A_33.P3397180 | LOC100129324 | Hs.368421 | hypothetical protein LOC100129324                          | Homo sapiens cDNA FLJ46397 fis, clone THYMU3003958, [AK128291]                                                                                                                                                                 | 1.94773 | down | 2.19156 | down | 261.73453   | 527.86540    | 130.90050   | 252.96530   | Detected | Detected | Detected    | Detected |
| 7138 | A_24.P65199   | CDK10        | Hs.699177 | cyclin-dependent kinase 10                                 | Homo sapiens cyclin-dependent kinase 10 (CDK10), transcript variant b, mRNA [NM_052987]                                                                                                                                        | 1.94685 | down | 2.81060 | down | 89.24003    | 179.89748    | 82.07780    | 203.41867   | Detected | Detected | Detected    | Detected |
| 7139 | A_23.P66715   | PIGS         | Hs.462950 | phosphatidylinositol glycan anchor biosynthesis, class S   | Homo sapiens phosphatidylinositol glycan anchor biosynthesis, class S (PIGS), mRNA [NM_033198]                                                                                                                                 | 1.94661 | down | 2.14583 | down | 510.69860   | 1029.38060   | 489.18472   | 925.62335   | Detected | Detected | Detected    | Detected |
| 7140 | A_32.P64475   | C1orf55      | Hs.520192 | chromosome 1 open reading frame 55                         | Homo sapiens chromosome 1 open reading frame 55 (C1orf55), mRNA [NM_152608]                                                                                                                                                    | 1.94658 | down | 2.09827 | down | 251.00652   | 505.93094    | 194.22960   | 359.37054   | Detected | Detected | Detected    | Detected |
| 7141 | A_24.P12904   | C9orf5       | Hs.308074 | chromosome 9 open reading frame 5                          | Homo sapiens chromosome 9 open reading frame 5 (C9orf5), mRNA [NM_032012]                                                                                                                                                      | 1.94499 | down | 2.26012 | down | 130.29497   | 262.40826    | 95.86076    | 191.04622   | Detected | Detected | Detected    | Detected |
| 7142 | A_33.P3418125 | GLIPR1       | Hs.205558 | GLI pathogenesis-related 1                                 | Homo sapiens GLI pathogenesis-related 1 (GLIPR1), mRNA [NM_006851]                                                                                                                                                             | 1.94492 | down | 2.01006 | down | 1264.85400  | 2547.27540   | 1015.31854  | 1799.60220  | Detected | Detected | Detected    | Detected |
| 7143 | A_33.P3346573 | MAP4         | Hs.517949 | microtubule-associated protein 4                           | Homo sapiens microtubule-associated protein 4 (MAP4), transcript variant 4, mRNA [NM_001134964]                                                                                                                                | 1.94461 | down | 2.09645 | down | 141.03023   | 283.97310    | 126.82512   | 234.45319   | Detected | Detected | Detected    | Detected |
| 7144 | A_24.P262355  | PHB          | Hs.514303 | prohibitin                                                 | Homo sapiens prohibitin (PHB), mRNA [NM_002634]                                                                                                                                                                                | 1.94422 | down | 2.05647 | down | 4253.56500  | 8563.10400   | 4539.12060  | 8231.14300  | Detected | Detected | Detected    | Detected |
| 7145 | A_33.P3305254 | PSMD5        | Hs.193725 | proteasome (prosome, macropain) 26S subunit, non-ATPase, 5 | Homo sapiens proteasome (prosome, macropain) 26S subunit, non-ATPase, 5 (PSMD5), mRNA [NM_005047]                                                                                                                              | 1.94364 | down | 2.16999 | down | 63.41556    | 127.62749    | 64.20201    | 122.84930   | Detected | Detected | Detected    | Detected |
| 7146 | A_33.P3306352 |              |           |                                                            | Transmembrane protein C20orf108 [Source:UniProtKB/Swiss-Prot;Acc:Q96KR6] [ENST00000324613]                                                                                                                                     | 1.94055 | down | 2.27751 | down | 29.06444    | 58.40081     | 37.34573    | 75.00100    | Detected | Detected | Detected    | Detected |
| 7147 | A_33.P3227472 | SDSL         | Hs.337594 | serine dehydratase-like                                    | Homo sapiens serine dehydratase-like (SDSL), mRNA [NM_138432]                                                                                                                                                                  | 1.93922 | down | 2.32057 | down | 821.22076   | 1648.99930   | 703.88650   | 1440.33290  | Detected | Detected | Detected    | Detected |
| 7148 | A_32.P725218  | METTL2A      | Hs.381204 | methyltransferase like 2A                                  | Homo sapiens methyltransferase like 2A (METTL2A), mRNA [NM_181725]                                                                                                                                                             | 1.93828 | down | 2.10266 | down | 232.97476   | 467.58237    | 202.91196   | 376.22040   | Detected | Detected | Detected    | Detected |
| 7149 | A_24.P219920  | FEM1A        | Hs.515082 | fem-1 homolog a (C. elegans)                               | Homo sapiens fem-1 homolog a (C. elegans) (FEM1A), mRNA [NM_018706]                                                                                                                                                            | 1.93808 | down | 2.10065 | down | 331.11620   | 664.48370    | 288.21838   | 533.87775   | Detected | Detected | Detected    | Detected |
| 7150 | A_33.P3489222 | PTPN20B      | Hs.499552 | protein tyrosine phosphatase, non-receptor type 20B        | Homo sapiens protein tyrosine phosphatase, non-receptor type 20B (PTPN20B), transcript variant 1, mRNA [NM_001042357]                                                                                                          | 1.93769 | down | 2.12932 | down | 41.37982    | 83.02457     | 10.65433    | 20.00470    | Detected | Detected | Compromised | Detected |



|      |               |          |           |                                                                       |                                                                                                                    |         |      |         |      |             |             |             |             |             |          |             |             |
|------|---------------|----------|-----------|-----------------------------------------------------------------------|--------------------------------------------------------------------------------------------------------------------|---------|------|---------|------|-------------|-------------|-------------|-------------|-------------|----------|-------------|-------------|
| 7151 | A_23_P44617   | COPG     | Hs.518250 | coatomer protein complex, subunit gamma                               | Homo sapiens coatomer protein complex, subunit gamma (COPG), mRNA [NM_016128]                                      | 1.93753 | down | 2.04624 | down | 1069.25440  | 2145.17870  | 1122.92680  | 2026.16260  | Detected    | Detected | Detected    | Detected    |
| 7152 | A_23_P118536  | SLFN12   | Hs.683548 | schlafen family member 12                                             | Homo sapiens schlafen family member 12 (SLFN12), mRNA [NM_018042]                                                  | 1.93627 | down | 2.02085 | down | 166.22006   | 333.26028   | 116.15559   | 206.98546   | Detected    | Detected | Detected    | Detected    |
| 7153 | A_23_P134274  | POP7     | Hs.416994 | processing of precursor 7, ribonuclease P/MRP subunit (S. cerevisiae) | Homo sapiens processing of precursor 7, ribonuclease P/MRP subunit (S. cerevisiae) (POP7), mRNA [NM_005837]        | 1.93499 | down | 2.06760 | down | 30276.30300 | 60661.82000 | 24823.47900 | 45258.02700 | Detected    | Detected | Detected    | Detected    |
| 7154 | A_33_P3400828 | NXNL2    | Hs.668937 | nucleoredoxin-like 2                                                  | Homo sapiens nucleoredoxin-like 2 (NXNL2), transcript variant 1, mRNA [NM_001161625]                               | 1.93434 | down | 2.38724 | down | 26.11175    | 52.30001    | 30.98619    | 65.22723    | Detected    | Detected | Detected    | Detected    |
| 7155 | A_24_P172481  | TRIM22   | Hs.501778 | tripartite motif-containing 22                                        | Homo sapiens tripartite motif-containing 22 (TRIM22), mRNA [NM_006074]                                             | 1.93386 | down | 2.04819 | down | 445.32730   | 891.73860   | 254.65129   | 459.91895   | Detected    | Detected | Detected    | Detected    |
| 7156 | A_24_P246173  | MYO9B    | Hs.123198 | myosin IXB                                                            | Homo sapiens myosin IXB (MYO9B), transcript variant 1, mRNA [NM_004145]                                            | 1.93360 | down | 2.06459 | down | 3666.12960  | 7340.21240  | 2407.92680  | 4383.71000  | Detected    | Detected | Detected    | Detected    |
| 7157 | A_24_P281580  | GATS     | Hs.556063 | GATS, stromal antigen 3 opposite strand                               | Homo sapiens GATS, stromal antigen 3 opposite strand (GATS), transcript variant 1, mRNA [NM_173831]                | 1.93332 | down | 2.17718 | down | 159.47366   | 319.24548   | 151.01064   | 289.91254   | Detected    | Detected | Detected    | Detected    |
| 7158 | A_33_P3270384 | PPP1R14B | Hs.523760 | protein phosphatase 1, regulatory (inhibitor) subunit 14B             | Homo sapiens protein phosphatase 1, regulatory (inhibitor) subunit 14B (PPP1R14B), mRNA [NM_138689]                | 1.93235 | down | 2.06099 | down | 43036.47700 | 86110.41000 | 31219.29000 | 56736.60500 | Detected    | Detected | Detected    | Detected    |
| 7159 | A_24_P21829   | SLC22A24 | Hs.375139 | solute carrier family 22, member 24                                   | Homo sapiens solute carrier family 22, member 24 (SLC22A24), mRNA [NM_001136506]                                   | 1.93174 | down | 2.10975 | down | 8.89875     | 17.79962    | 2.81989     | 5.24600     | Compromised | Detected | Compromised | Compromised |
| 7160 | A_23_P211814  | MAP4     | Hs.517949 | microtubule-associated protein 4                                      | Homo sapiens microtubule-associated protein 4 (MAP4), transcript variant 1, mRNA [NM_002375]                       | 1.93173 | down | 2.02624 | down | 6129.90800  | 12261.20200 | 5213.96300  | 9315.87400  | Detected    | Detected | Detected    | Detected    |
| 7161 | A_23_P170290  | TMEM57   | Hs.189782 | transmembrane protein 57                                              | Homo sapiens transmembrane protein 57 (TMEM57), mRNA [NM_018202]                                                   | 1.93063 | down | 2.02607 | down | 734.38965   | 1468.11340  | 852.85770   | 1523.69210  | Detected    | Detected | Detected    | Detected    |
| 7162 | A_33_P3369452 | C22orf25 | Hs.474233 | chromosome 22 open reading frame 25                                   | Homo sapiens chromosome 22 open reading frame 25 (C22orf25), mRNA [NM_152906]                                      | 1.92974 | down | 2.32837 | down | 463.52414   | 926.19684   | 503.41855   | 1033.58830  | Detected    | Detected | Detected    | Detected    |
| 7163 | A_33_P3705907 | C21orf70 | Hs.410830 | chromosome 21 open reading frame 70                                   | Homo sapiens chromosome 21 open reading frame 70 (C21orf70), mRNA [NM_058190]                                      | 1.92832 | down | 2.01210 | down | 934.58570   | 1866.08130  | 845.69147   | 1500.47220  | Detected    | Detected | Detected    | Detected    |
| 7164 | A_23_P394836  | INF2     | Hs.24956  | inverted formin, FH2 and WH2 domain containing                        | Homo sapiens inverted formin, FH2 and WH2 domain containing (INF2), transcript variant 1, mRNA [NM_022489]         | 1.92702 | down | 2.38330 | down | 1143.37760  | 2281.43750  | 1008.98180  | 2120.44580  | Detected    | Detected | Detected    | Detected    |
| 7165 | A_24_P213206  | ZNF259P  | Hs.626676 | zinc finger protein 259, pseudogene                                   | Homo sapiens mRNA; cDNA DKFZ781A1422 (from clone DKFZ781A1422) [CR627445]                                          | 1.92471 | down | 2.47184 | down | 563.71780   | 1123.46570  | 188.32849   | 410.48907   | Detected    | Detected | Detected    | Detected    |
| 7166 | A_24_P210513  | BTBD7    | Hs.525549 | BTB (POZ) domain containing 7                                         | Homo sapiens BTB (POZ) domain containing 7 (BTBD7), transcript variant 2, mRNA [NM_018167]                         | 1.92407 | down | 2.23070 | down | 72.39625    | 144.23480   | 75.92795    | 149.35088   | Detected    | Detected | Detected    | Detected    |
| 7167 | A_32_P79190   |          | Hs.609146 |                                                                       | PREDICTED: Homo sapiens ankyrin repeat domain 20 family, member A pseudogene (LOC375010), miscRNA [XR_079090]      | 1.92363 | down | 2.85912 | down | 12.70114    | 25.29870    | 3.81973     | 9.63012     | Detected    | Detected | Compromised | Compromised |
| 7168 | A_24_P339664  | NCLN     | Hs.657032 | nicalin homolog (zebrafish)                                           | Homo sapiens nicalin homolog (zebrafish) (NCLN), mRNA [NM_020170]                                                  | 1.92301 | down | 2.08397 | down | 14882.93100 | 29634.85200 | 15295.79500 | 28107.92600 | Detected    | Detected | Detected    | Detected    |
| 7169 | A_24_P333663  | MAPK6    | Hs.411847 | mitogen-activated protein kinase 6                                    | Homo sapiens mitogen-activated protein kinase 6 (MAPK6), mRNA [NM_002748]                                          | 1.92179 | down | 2.03050 | down | 164.40840   | 327.16296   | 129.40807   | 231.70255   | Detected    | Detected | Detected    | Detected    |
| 7170 | A_23_P204436  | GIT2     | Hs.434996 | G protein-coupled receptor kinase interacting ArfGAP 2                | Homo sapiens G protein-coupled receptor kinase interacting ArfGAP 2 (GIT2), transcript variant 4, mRNA [NM_139201] | 1.92037 | down | 2.05559 | down | 134.20543   | 266.86300   | 127.55027   | 231.19789   | Detected    | Detected | Detected    | Detected    |
| 7171 | A_32_P227317  | MGC13005 | Hs.712940 | hypothetical LOC84771                                                 | Homo sapiens hypothetical LOC84771 (MGC13005), transcript variant 2, non-coding RNA [NR_024005]                    | 1.92034 | down | 2.11116 | down | 87.43752    | 173.86382   | 60.82715    | 113.23599   | Detected    | Detected | Detected    | Detected    |
| 7172 | A_32_P310503  | OR2M2    | Hs.534728 | olfactory receptor, family 2, subfamily M, member 2                   | Homo sapiens olfactory receptor, family 2, subfamily M, member 2 (OR2M2), mRNA [NM_001004688]                      | 1.92021 | down | 2.92140 | down | 14.94847    | 29.72208    | 3.02851     | 7.80161     | Detected    | Detected | Compromised | Compromised |
| 7173 | A_24_P21266   | ERLN2    | Hs.705490 | ER lipid raft associated 2                                            | Homo sapiens ER lipid raft associated 2 (ERLN2), transcript variant 2, mRNA [NM_001003790]                         | 1.91943 | down | 2.93083 | down | 22.87498    | 45.46388    | 9.29561     | 24.02334    | Detected    | Detected | Compromised | Detected    |
| 7174 | A_33_P3323481 | BGLAP    | Hs.654541 | bone gamma-carboxyglutamate (gla) protein                             | Homo sapiens bone gamma-carboxyglutamate (gla) protein (BGLAP), mRNA [NM_199173]                                   | 1.91897 | down | 2.47044 | down | 32.77552    | 65.12544    | 25.87989    | 56.37713    | Detected    | Detected | Detected    | Detected    |
| 7175 | A_33_P3302015 | ADAMTSL1 | Hs.522019 | ADAMTS-like 1                                                         | Homo sapiens ADAMTS-like 1 (ADAMTSL1), transcript variant 4, mRNA [NM_001040272]                                   | 1.91743 | down | 4.85194 | down | 14.89371    | 29.57023    | 3.45528     | 14.78305    | Compromised | Detected | Compromised | Compromised |
| 7176 | A_33_P3217123 | BCL2L12  | Hs.289052 | BCL2-like 12 (proline rich)                                           | Homo sapiens BCL2-like 12 (proline rich) (BCL2L12), transcript variant 1, mRNA [NM_138639]                         | 1.91654 | down | 2.02012 | down | 15013.63100 | 29794.56400 | 13003.88300 | 23163.78300 | Detected    | Detected | Detected    | Detected    |
| 7177 | A_23_P202104  | PPIF     | Hs.381072 | peptidylprolyl isomerase F                                            | Homo sapiens peptidylprolyl isomerase F (PPIF), nuclear gene encoding mitochondrial protein, mRNA [NM_005729]      | 1.91650 | down | 2.02454 | down | 17602.96500 | 34932.34000 | 14306.02800 | 25539.40200 | Detected    | Detected | Detected    | Detected    |
| 7178 | A_23_P2873    | KLC1     | Hs.20107  | kinesin light chain 1                                                 | Homo sapiens kinesin light chain 1 (KLC1), transcript variant 2, mRNA [NM_182923]                                  | 1.91650 | down | 2.07314 | down | 4327.02200  | 8586.78600  | 3702.86300  | 6769.10160  | Detected    | Detected | Detected    | Detected    |
| 7179 | A_24_P484797  | CIDECP   | Hs.635072 | cell death-inducing DFFA-like effector c pseudogene                   | Homo sapiens cell death-inducing DFFA-like effector c pseudogene (CIDECP), non-coding RNA [NR_002786]              | 1.91545 | down | 2.02608 | down | 352.23788   | 698.61865   | 430.74450   | 769.55830   | Detected    | Detected | Detected    | Detected    |

|      |               |              |           |                                                              |                                                                                                                          |         |      |         |      |             |             |             |             |             |          |             |             |
|------|---------------|--------------|-----------|--------------------------------------------------------------|--------------------------------------------------------------------------------------------------------------------------|---------|------|---------|------|-------------|-------------|-------------|-------------|-------------|----------|-------------|-------------|
| 7180 | A_33_P3288614 | LOC100128163 | Hs.644875 | hypothetical LOC100128163                                    | PREDICTED: Homo sapiens hypothetical LOC100128163 (LOC100128163), mRNA [XM_001719960]                                    | 1.91398 | down | 2.31471 | down | 148.33209   | 293.97150   | 100.17751   | 204.47144   | Detected    | Detected | Detected    | Detected    |
| 7181 | A_24_P363679  | ATP6V1H      | Hs.491737 | ATPase, H+ transporting, lysosomal 50/57kDa, V1 subunit H    | Homo sapiens ATPase, H+ transporting, lysosomal 50/57kDa, V1 subunit H (ATP6V1H), transcript variant 1, mRNA [NM_015941] | 1.91370 | down | 2.03877 | down | 795.89670   | 1577.11660  | 528.49250   | 950.10550   | Detected    | Detected | Detected    | Detected    |
| 7182 | A_33_P3316639 | VPS24        | Hs.591582 | vacuolar protein sorting 24 homolog (S. cerevisiae)          | Homo sapiens vacuolar protein sorting 24 homolog (S. cerevisiae) (VPS24), transcript variant 1, mRNA [NM_016079]         | 1.91102 | down | 2.01095 | down | 1130.55430  | 2237.12770  | 1200.52310  | 2128.80790  | Detected    | Detected | Detected    | Detected    |
| 7183 | A_33_P3311308 | LOC727918    |           | hypothetical LOC727918                                       | PREDICTED: Homo sapiens hypothetical LOC727918 (LOC727918), mRNA [XM_001133617]                                          | 1.91062 | down | 2.01286 | down | 20.52316    | 40.60236    | 3.10923     | 5.51865     | Detected    | Detected | Compromised | Compromised |
| 7184 | A_32_P199301  | TFDP1        | Hs.79353  | transcription factor Dp-1                                    | Homo sapiens transcription factor Dp-1 (TFDP1), transcript variant 1, mRNA [NM_007111]                                   | 1.91000 | down | 2.02410 | down | 660.06820   | 1305.43180  | 716.84880   | 1279.45590  | Detected    | Detected | Detected    | Detected    |
| 7185 | A_33_P3344264 | DUS3L        | Hs.284297 | dihydrouridine synthase 3-like (S. cerevisiae)               | Homo sapiens dihydrouridine synthase 3-like (S. cerevisiae) (DUS3L), transcript variant 1, mRNA [NM_020175]              | 1.90844 | down | 2.10904 | down | 3164.11080  | 6252.64300  | 2771.42800  | 5154.11400  | Detected    | Detected | Detected    | Detected    |
| 7186 | A_23_P35131   | SF3B4        | Hs.516160 | splicing factor 3b, subunit 4, 49kDa                         | Homo sapiens splicing factor 3b, subunit 4, 49kDa (SF3B4), mRNA [NM_005850]                                              | 1.90568 | down | 2.73836 | down | 93.35336    | 184.21005   | 57.96134    | 139.95702   | Detected    | Detected | Detected    | Detected    |
| 7187 | A_23_P19004   | BRD9         | Hs.449278 | bromodomain containing 9                                     | Homo sapiens bromodomain containing 9 (BRD9), transcript variant 1, mRNA [NM_023924]                                     | 1.90532 | down | 2.01852 | down | 1257.27820  | 2480.46170  | 1191.50220  | 2120.77370  | Detected    | Detected | Detected    | Detected    |
| 7188 | A_33_P3311956 | FEZ2         | Hs.258563 | fasciculation and elongation protein zeta 2 (zyglin II)      | Homo sapiens fasciculation and elongation protein zeta 2 (zyglin II) (FEZ2), transcript variant 2, mRNA [NM_001042548]   | 1.90437 | down | 2.00817 | down | 2765.81840  | 5453.91460  | 1905.21060  | 3373.72170  | Detected    | Detected | Detected    | Detected    |
| 7189 | A_33_P3415957 | GTF2A2       | Hs.512934 | general transcription factor IIA, 2, 12kDa                   | Homo sapiens general transcription factor IIA, 2, 12kDa (GTF2A2), mRNA [NM_004492]                                       | 1.90193 | down | 3.03331 | down | 11292.72600 | 22239.56000 | 6020.25830  | 16102.63300 | Detected    | Detected | Detected    | Detected    |
| 7190 | A_23_P88848   | DUS2L        | Hs.534460 | dihydrouridine synthase 2-like, SMM1 homolog (S. cerevisiae) | Homo sapiens dihydrouridine synthase 2-like, SMM1 homolog (S. cerevisiae) (DUS2L), mRNA [NM_017893]                      | 1.90140 | down | 2.16274 | down | 587.13750   | 1155.97180  | 516.06460   | 984.17690   | Detected    | Detected | Detected    | Detected    |
| 7191 | A_23_P60387   | NOTCH1       | Hs.495473 | Notch homolog 1, translocation-associated (Drosophila)       | Homo sapiens Notch homolog 1, translocation-associated (Drosophila) (NOTCH1), mRNA [NM_017617]                           | 1.90009 | down | 2.14883 | down | 66.15070    | 130.14928   | 41.77545    | 79.15676    | Detected    | Detected | Detected    | Detected    |
| 7192 | A_33_P3288700 | C21orf70     | Hs.410830 | chromosome 21 open reading frame 70                          | Homo sapiens chromosome 21 open reading frame 70 (C21orf70), mRNA [NM_058190]                                            | 1.89786 | down | 2.01901 | down | 480.70724   | 944.66520   | 479.93695   | 854.45355   | Detected    | Detected | Detected    | Detected    |
| 7193 | A_33_P3309999 | DCAF12L2     | Hs.496728 | DDB1 and CUL4 associated factor 12-like 2                    | Homo sapiens DDB1 and CUL4 associated factor 12-like 2 (DCAF12L2), mRNA [NM_001013628]                                   | 1.89746 | down | 2.21887 | down | 44.00874    | 86.46606    | 23.37151    | 45.72823    | Detected    | Detected | Detected    | Detected    |
| 7194 | A_33_P3401008 | TMEM150B     | Hs.382625 | transmembrane protein 150B                                   | Homo sapiens transmembrane protein 150B (TMEM150B), mRNA [NM_001085488]                                                  | 1.89704 | down | 2.17005 | down | 21.45020    | 42.13478    | 21.50138    | 41.14356    | Detected    | Detected | Detected    | Detected    |
| 7195 | A_33_P3298634 | OR1L6        |           | olfactory receptor, family 1, subfamily L, member 6          | Olfactory receptor 1L6 (Olfactory receptor OR9-30) [Source:UniProtKB/Swiss-Prot;Acc:Q8NGR2] [ENST00000373684]            | 1.89597 | down | 3.06122 | down | 74.11687    | 145.50587   | 13.68661    | 36.94497    | Detected    | Detected | Detected    | Detected    |
| 7196 | A_23_P215534  | RBM33        | Hs.591815 | RNA binding motif protein 33                                 | Homo sapiens RNA binding motif protein 33 (RBM33), mRNA [NM_059043]                                                      | 1.89385 | down | 2.62614 | down | 10.47034    | 20.53238    | 7.79385     | 18.04827    | Compromised | Detected | Compromised | Detected    |
| 7197 | A_24_P68891   | NKX6-1       | Hs.546270 | NK6 homeobox 1                                               | Homo sapiens NK6 homeobox 1 (NKX6-1), mRNA [NM_006168]                                                                   | 1.89295 | down | 2.13423 | down | 26.09088    | 51.14008    | 22.97795    | 43.24320    | Detected    | Detected | Detected    | Detected    |
| 7198 | A_33_P3374165 | LOC728145    | Hs.638538 | hypothetical protein LOC728145                               | PREDICTED: Homo sapiens hypothetical protein LOC728145 (LOC728145), miscRNA [XR_040729]                                  | 1.89260 | down | 3.35557 | down | 12.29789    | 24.10032    | 6.48850     | 19.19890    | Compromised | Detected | Compromised | Detected    |
| 7199 | A_23_P35820   | CFL1         | Hs.170622 | cofilin 1 (non-muscle)                                       | Homo sapiens cofilin 1 (non-muscle) (CFL1), mRNA [NM_005507]                                                             | 1.89252 | down | 2.05789 | down | 8055.42630  | 15785.65200 | 7563.17430  | 13724.35400 | Detected    | Detected | Detected    | Detected    |
| 7200 | A_33_P3407626 | LOC727847    |           | similar to hCG1984643                                        | PREDICTED: Homo sapiens similar to hCG1984643 (LOC727847), mRNA [XM_001125923]                                           | 1.89221 | down | 2.07745 | down | 92.94914    | 182.11604   | 72.01417    | 131.92131   | Detected    | Detected | Detected    | Detected    |
| 7201 | A_33_P3367830 | EFEMP2       | Hs.719933 | EGF-containing fibulin-like extracellular matrix protein 2   | Homo sapiens EGF-containing fibulin-like extracellular matrix protein 2 (EFEMP2), mRNA [NM_016938]                       | 1.88878 | down | 2.01953 | down | 18855.47500 | 36876.76600 | 16793.77300 | 29906.32600 | Detected    | Detected | Detected    | Detected    |
| 7202 | A_33_P3296777 | PSMF1        | Hs.471917 | proteasome (prosome, macropain) inhibitor subunit 1 (P31)    | Homo sapiens proteasome (prosome, macropain) inhibitor subunit 1 (P31) (PSMF1), transcript variant 1, mRNA [NM_006814]   | 1.88847 | down | 2.23481 | down | 94.14610    | 184.09679   | 60.30994    | 118.84903   | Detected    | Detected | Detected    | Detected    |
| 7203 | A_24_P827     | SUPT3H       | Hs.368325 | suppressor of Ty 3 homolog (S. cerevisiae)                   | Homo sapiens suppressor of Ty 3 homolog (S. cerevisiae) (SUPT3H), transcript variant 1, mRNA [NM_003599]                 | 1.88353 | down | 2.85960 | down | 43.96681    | 85.74927    | 19.85378    | 50.06265    | Detected    | Detected | Detected    | Detected    |
| 7204 | A_33_P3243554 | SEPT6        | Hs.496666 | septin 6                                                     | Homo sapiens septin 6 (SEPT6), transcript variant V, mRNA [NM_145802]                                                    | 1.88259 | down | 2.77554 | down | 55.02842    | 107.26940   | 34.71841    | 84.97138    | Detected    | Detected | Detected    | Detected    |
| 7205 | A_23_P139471  | RPS26        | Hs.567235 | ribosomal protein S26                                        | Homo sapiens ribosomal protein S26 (RPS26), mRNA [NM_001029]                                                             | 1.88134 | down | 2.21827 | down | 20.52752    | 39.98868    | 15.47840    | 30.27650    | Detected    | Detected | Detected    | Detected    |
| 7206 | A_23_P117797  | CLN6         | Hs.584921 | ceroid-lipofuscinosis, neuronal 6, late infantile, variant   | Homo sapiens ceroid-lipofuscinosis, neuronal 6, late infantile, variant (CLN6), mRNA [NM_017882]                         | 1.88105 | down | 2.04183 | down | 626.44965   | 1220.16940  | 569.31480   | 1025.03000  | Detected    | Detected | Detected    | Detected    |
| 7207 | A_23_P80136   | RRP1         | Hs.110757 | ribosomal RNA processing 1 homolog (S. cerevisiae)           | Homo sapiens ribosomal RNA processing 1 homolog (S. cerevisiae) (RRP1), mRNA [NM_003683]                                 | 1.87824 | down | 2.05138 | down | 1019.54220  | 1982.84450  | 773.69340   | 1399.52430  | Detected    | Detected | Detected    | Detected    |
| 7208 | A_24_P281908  | CUX2         | Hs.124953 | cut-like homeobox 2                                          | Homo sapiens cut-like homeobox 2 (CUX2), mRNA [NM_015267]                                                                | 1.87781 | down | 2.49157 | down | 27.53669    | 53.54235    | 6.47025     | 14.21541    | Detected    | Detected | Compromised | Compromised |

|      |               |              |           |                                                                 |                                                                                                                                                                                                                                                                                                                                                                                                                       |         |      |         |      |            |             |            |             |             |          |             |             |
|------|---------------|--------------|-----------|-----------------------------------------------------------------|-----------------------------------------------------------------------------------------------------------------------------------------------------------------------------------------------------------------------------------------------------------------------------------------------------------------------------------------------------------------------------------------------------------------------|---------|------|---------|------|------------|-------------|------------|-------------|-------------|----------|-------------|-------------|
| 7209 | A_23_P90484   | SARS2        | Hs.709416 | seryl-tRNA synthetase 2, mitochondrial                          | Homo sapiens seryl-tRNA synthetase 2, mitochondrial (SARS2), nuclear gene encoding mitochondrial protein, transcript variant 2, mRNA [NM_017827]                                                                                                                                                                                                                                                                      | 1.87763 | down | 2.18201 | down | 403.97308  | 785.40830   | 448.76560  | 863.45935   | Detected    | Detected | Detected    | Detected    |
| 7210 | A_23_P355439  | HIST1H2AA    | Hs.406739 | histone cluster 1, H2aa                                         | Homo sapiens histone cluster 1, H2aa (HIST1H2AA), mRNA [NM_170745]                                                                                                                                                                                                                                                                                                                                                    | 1.87763 | down | 2.11110 | down | 124.25680  | 241.58101   | 24.40260   | 45.42666    | Detected    | Detected | Detected    | Detected    |
| 7211 | A_33_P3262083 | LOC100126784 | Hs.64341  | hypothetical LOC100126784                                       | Homo sapiens hypothetical LOC100126784 (LOC100126784), non-coding RNA [NR_015384]                                                                                                                                                                                                                                                                                                                                     | 1.87761 | down | 2.34674 | down | 74.30579   | 144.46430   | 58.02280   | 120.06858   | Detected    | Detected | Detected    | Detected    |
| 7212 | A_23_P155890  | ARD1B        | Hs.676048 | ARD1 homolog B (S. cerevisiae)                                  | Homo sapiens ARD1 homolog B (S. cerevisiae) (ARD1B), mRNA [NM_032693]                                                                                                                                                                                                                                                                                                                                                 | 1.87586 | down | 2.04561 | down | 686.77814  | 1333.98440  | 886.17430  | 1598.48180  | Detected    | Detected | Detected    | Detected    |
| 7213 | A_33_P3292218 |              |           |                                                                 |                                                                                                                                                                                                                                                                                                                                                                                                                       | 1.87552 | down | 2.11969 | down | 588.15840  | 1142.21570  | 451.24768  | 843.43820   | Detected    | Detected | Detected    | Detected    |
| 7214 | A_23_P149206  | B4GALT2      | Hs.632403 | UDP-GalbetaGlcNAc beta 1,4-galactosyltransferase, polypeptide 2 | Homo sapiens UDP-GalbetaGlcNAc beta 1,4-galactosyltransferase, polypeptide 2 (B4GALT2), transcript variant 2, mRNA [NM_003780]                                                                                                                                                                                                                                                                                        | 1.87399 | down | 2.04136 | down | 4733.40620 | 9184.87100  | 4363.87600 | 7855.20950  | Detected    | Detected | Detected    | Detected    |
| 7215 | A_24_P105733  | TNS1         | Hs.471381 | tensin 1                                                        | Homo sapiens tensin 1 (TNS1), mRNA [NM_022646]                                                                                                                                                                                                                                                                                                                                                                        | 1.87372 | down | 2.13911 | down | 80.16484   | 155.53233   | 57.25235   | 107.99197   | Detected    | Detected | Detected    | Detected    |
| 7216 | A_33_P3258223 | MCM7         | Hs.438720 | minichromosome maintenance complex component 7                  | Homo sapiens minichromosome maintenance complex component 7 (MCM7), transcript variant 1, mRNA [NM_005916]                                                                                                                                                                                                                                                                                                            | 1.87355 | down | 2.79103 | down | 250.84853  | 486.64160   | 156.44980  | 385.03970   | Detected    | Detected | Detected    | Detected    |
| 7217 | A_33_P3239527 | LOC100128517 | Hs.484706 | hypothetical protein LOC100128517                               | Homo sapiens cDNA FLJ44820 fis. clone BRAC3046049. [AK126772]                                                                                                                                                                                                                                                                                                                                                         | 1.87303 | down | 2.32790 | down | 25.89623   | 50.22429    | 24.27096   | 49.82145    | Detected    | Detected | Detected    | Detected    |
| 7218 | A_33_P3671378 | CERCAM       | Hs.495230 | cerebral endothelial cell adhesion molecule                     | Homo sapiens cerebral endothelial cell adhesion molecule (CERCAM), mRNA [NM_016174]                                                                                                                                                                                                                                                                                                                                   | 1.87160 | down | 2.39415 | down | 341.46594  | 661.74976   | 222.19014  | 469.07330   | Detected    | Detected | Detected    | Detected    |
| 7219 | A_33_P3317761 | DAD1L        |           | defender against cell death 1-like                              | Homo sapiens defender against cell death 1-like (DAD1L), non-coding RNA [NR_024064]                                                                                                                                                                                                                                                                                                                                   | 1.87103 | down | 2.23712 | down | 101.66131  | 196.95636   | 38.42505   | 75.80004    | Detected    | Detected | Detected    | Detected    |
| 7220 | A_33_P3323453 | HM13         | Hs.373741 | histocompatibility (minor) 13                                   | Homo sapiens histocompatibility (minor) 13 (HM13), transcript variant 1, mRNA [NM_030789]                                                                                                                                                                                                                                                                                                                             | 1.86765 | down | 2.15059 | down | 1413.12840 | 2732.81300  | 2009.26230 | 3810.30030  | Detected    | Detected | Detected    | Detected    |
| 7221 | A_33_P3865368 |              | Hs.655801 |                                                                 | Tumor necrosis factor receptor superfamily member 10C Precursor (Decoy receptor 1)(DcR1)(Decoy TRAIL receptor without death domain)(TNF-related apoptosis-inducing ligand receptor 3)(TRAIL receptor 3)(TRAIL-R3)(Trail receptor without an intracellular domain)(Lymphocyte inhibitor of TRAIL)(Antagonist decoy receptor for TRAIL/Apo-2L/CD263 antigen) [Source:UniProtKB/Swiss-Prot;Acc:O14796] [ENST00000397703] | 1.86322 | down | 2.03532 | down | 70.53822   | 136.08827   | 55.51453   | 99.63352    | Detected    | Detected | Detected    | Detected    |
| 7222 | A_23_P164436  | ASPA         | Hs.171142 | aspartoacylase (Canavan disease)                                | Homo sapiens aspartoacylase (Canavan disease) (ASPA), transcript variant 1, mRNA [NM_000049]                                                                                                                                                                                                                                                                                                                          | 1.86146 | down | 2.26094 | down | 9.12901    | 17.59588    | 2.80417    | 5.59060     | Compromised | Detected | Compromised | Compromised |
| 7223 | A_24_P291231  | PER3         | Hs.162200 | period homolog 3 (Drosophila)                                   | Homo sapiens period homolog 3 (Drosophila) (PER3), mRNA [NM_016831]                                                                                                                                                                                                                                                                                                                                                   | 1.85985 | down | 2.04070 | down | 126.88088  | 244.34729   | 82.15987   | 147.84450   | Detected    | Detected | Detected    | Detected    |
| 7224 | A_23_P200096  | SPSB1        | Hs.8261   | sp1A/ryanodine receptor domain and SOCS box containing 1        | Homo sapiens sp1A/ryanodine receptor domain and SOCS box containing 1 (SPSB1), mRNA [NM_025106]                                                                                                                                                                                                                                                                                                                       | 1.85832 | down | 2.11898 | down | 224.19199  | 431.39334   | 204.26575  | 381.66986   | Detected    | Detected | Detected    | Detected    |
| 7225 | A_23_P80817   | TAGLN3       | Hs.169330 | transgelin 3                                                    | Homo sapiens transgelin 3 (TAGLN3), transcript variant 1, mRNA [NM_013259]                                                                                                                                                                                                                                                                                                                                            | 1.85723 | down | 3.68563 | down | 72.07568   | 138.60800   | 6.86306    | 22.30464    | Detected    | Detected | Compromised | Detected    |
| 7226 | A_33_P3273624 | HYAL3        | Hs.129910 | hyaluronoglucosaminidase 3                                      | Homo sapiens hyaluronoglucosaminidase 3 (HYAL3), mRNA [NM_003649]                                                                                                                                                                                                                                                                                                                                                     | 1.85673 | down | 2.18014 | down | 130.38518  | 250.67397   | 121.19941  | 232.99655   | Detected    | Detected | Detected    | Detected    |
| 7227 | A_23_P106562  | GALNS        | Hs.271383 | galactosamine (N-acetyl)-6-sulfate sulfatase                    | Homo sapiens galactosamine (N-acetyl)-6-sulfate sulfatase (GALNS), mRNA [NM_000512]                                                                                                                                                                                                                                                                                                                                   | 1.85477 | down | 2.38781 | down | 518.15967  | 995.14844   | 414.78705  | 873.35530   | Detected    | Detected | Detected    | Detected    |
| 7228 | A_32_P12104   | ANAPC1       | Hs.436527 | anaphase promoting complex subunit 1                            | Homo sapiens anaphase promoting complex subunit 1 (ANAPC1), mRNA [NM_022662]                                                                                                                                                                                                                                                                                                                                          | 1.85434 | down | 2.04348 | down | 59.23720   | 113.74076   | 36.30728   | 65.42297    | Detected    | Detected | Detected    | Detected    |
| 7229 | A_24_P349039  | CDGAP        | Hs.668218 | Cdc42 GTPase-activating protein                                 | Homo sapiens Cdc42 GTPase-activating protein (CDGAP), mRNA [NM_020754]                                                                                                                                                                                                                                                                                                                                                | 1.85371 | down | 2.01331 | down | 283.63147  | 544.41425   | 187.78233  | 333.37396   | Detected    | Detected | Detected    | Detected    |
| 7230 | A_33_P3308612 | HSPG2        | Hs.562227 | heparan sulfate proteoglycan 2                                  | Homo sapiens heparan sulfate proteoglycan 2 (HSPG2), mRNA [NM_005529]                                                                                                                                                                                                                                                                                                                                                 | 1.85289 | down | 2.12296 | down | 61.51276   | 118.01819   | 59.15389   | 110.73639   | Detected    | Detected | Detected    | Detected    |
| 7231 | A_23_P170337  | ALDH4A1      | Hs.77448  | aldehyde dehydrogenase 4 family, member A1                      | Homo sapiens aldehyde dehydrogenase 4 family, member A1 (ALDH4A1), nuclear gene encoding mitochondrial protein, transcript variant P5CDhL, mRNA [NM_003748]                                                                                                                                                                                                                                                           | 1.85247 | down | 2.49925 | down | 787.73773  | 1511.00790  | 670.73267  | 1478.17180  | Detected    | Detected | Detected    | Detected    |
| 7232 | A_23_P115838  | C10orf12     | Hs.427927 | chromosome 10 open reading frame 12                             | Homo sapiens chromosome 10 open reading frame 12 (C10orf12), mRNA [NM_015652]                                                                                                                                                                                                                                                                                                                                         | 1.85180 | down | 2.02699 | down | 58.12010   | 111.44312   | 37.21150   | 66.51118    | Detected    | Detected | Detected    | Detected    |
| 7233 | A_32_P148710  | CFL1         | Hs.170622 | cofilin 1 (non-muscle)                                          | Homo sapiens cofilin 1 (non-muscle) (CFL1), mRNA [NM_005507]                                                                                                                                                                                                                                                                                                                                                          | 1.85144 | down | 2.00564 | down | 6964.90620 | 13352.33500 | 5818.79640 | 10290.87300 | Detected    | Detected | Detected    | Detected    |
| 7234 | A_33_P3695548 | POLE         | Hs.524871 | polymerase (DNA directed), epsilon                              | Homo sapiens polymerase (DNA directed), epsilon (POLE), mRNA [NM_006231]                                                                                                                                                                                                                                                                                                                                              | 1.85042 | down | 2.25332 | down | 212.75995  | 407.65518   | 161.05402  | 320.00740   | Detected    | Detected | Detected    | Detected    |

|      |               |              |           |                                                           |                                                                                                                                                                 |         |      |         |      |            |            |            |            |             |          |             |             |
|------|---------------|--------------|-----------|-----------------------------------------------------------|-----------------------------------------------------------------------------------------------------------------------------------------------------------------|---------|------|---------|------|------------|------------|------------|------------|-------------|----------|-------------|-------------|
| 7235 | A_33_P3381255 |              |           |                                                           | C-type lectin domain family 2 member A (Proliferation-induced lymphocyte-associated receptor)(PILAR) [Source:UniProtKB/Swiss-Prot;Acc:O61VW9] [ENST00000339766] | 1.84934 | down | 2.53908 | down | 18.37636   | 35.18923   | 5.57790    | 12.48855   | Detected    | Detected | Compromised | Compromised |
| 7236 | A_33_P3406030 | LRRC8C       | Hs.412836 | leucine rich repeat containing 8 family, member C         | Homo sapiens leucine rich repeat containing 8 family, member C (LRRC8C), mRNA [NM_032270]                                                                       | 1.84629 | down | 2.03400 | down | 26.84856   | 51.32800   | 27.60311   | 49.50794   | Detected    | Detected | Detected    | Detected    |
| 7237 | A_33_P3423979 | PALLD        | Hs.151220 | palladin, cytoskeletal associated protein                 | Homo sapiens palladin, cytoskeletal associated protein (PALLD), transcript variant 3, mRNA [NM_001166109]                                                       | 1.84459 | down | 2.02341 | down | 872.69570  | 1666.84890 | 485.42233  | 866.10380  | Detected    | Detected | Detected    | Detected    |
| 7238 | A_23_P90172   | PPP1R15A     | Hs.631593 | protein phosphatase 1, regulatory (inhibitor) subunit 15A | Homo sapiens protein phosphatase 1, regulatory (inhibitor) subunit 15A (PPP1R15A), mRNA [NM_014330]                                                             | 1.84416 | down | 2.05674 | down | 1772.51970 | 3384.71630 | 2307.90480 | 4185.64360 | Detected    | Detected | Detected    | Detected    |
| 7239 | A_23_P70818   | SMO          | Hs.437846 | smoothened homolog (Drosophila)                           | Homo sapiens smoothened homolog (Drosophila) (SMO), mRNA [NM_005631]                                                                                            | 1.84259 | down | 2.48376 | down | 73.99532   | 141.17750  | 62.68320   | 137.28574  | Detected    | Detected | Detected    | Detected    |
| 7240 | A_33_P338695  | TXNDC11      | Hs.313847 | thioredoxin domain containing 11                          | Homo sapiens thioredoxin domain containing 11 (TXNDC11), mRNA [NM_015914]                                                                                       | 1.84216 | down | 2.23854 | down | 35.63405   | 67.97138   | 28.06592   | 55.39988   | Detected    | Detected | Detected    | Detected    |
| 7241 | A_33_P3307910 |              |           |                                                           | Putative uncharacterized protein ENSP00000386728 [Source:UniProtKB/TrEMBL;Acc:8BZZY5] [ENST00000409490]                                                         | 1.83988 | down | 2.45017 | down | 18.76161   | 35.74307   | 13.46901   | 29.10030   | Detected    | Detected | Detected    | Detected    |
| 7242 | A_33_P3238671 | C20orf196    | Hs.529340 | chromosome 20 open reading frame 196                      | Homo sapiens chromosome 20 open reading frame 196 (C20orf196), mRNA [NM_152504]                                                                                 | 1.83971 | down | 2.05754 | down | 142.64900  | 271.73807  | 126.53362  | 229.57271  | Detected    | Detected | Detected    | Detected    |
| 7243 | A_33_P3394489 | LOC100144603 | Hs.657275 | hypothetical transcript                                   | Homo sapiens hypothetical transcript (LOC100144603), non-coding RNA [NR_021492]                                                                                 | 1.83924 | down | 2.06043 | down | 112.35917  | 213.98310  | 145.94128  | 265.15543  | Detected    | Detected | Detected    | Detected    |
| 7244 | A_33_P3210647 | COL16A1      | Hs.368921 | collagen, type XVI, alpha 1                               | Homo sapiens collagen, type XVI, alpha 1 (COL16A1), mRNA [NM_001856]                                                                                            | 1.82870 | down | 2.11175 | down | 1963.33250 | 3717.65700 | 1019.17760 | 1897.83470 | Detected    | Detected | Detected    | Detected    |
| 7245 | A_33_P3329592 | BLOC1S3      | Hs.103902 | biogenesis of lysosomal organelles complex-1, subunit 3   | Homo sapiens biogenesis of lysosomal organelles complex-1, subunit 3 (BLOC1S3), mRNA [NM_212550]                                                                | 1.82810 | down | 2.04399 | down | 44.02268   | 83.33167   | 53.91716   | 97.17870   | Detected    | Detected | Detected    | Detected    |
| 7246 | A_33_P3388536 | LOC728752    | Hs.646352 | similar to chromosome 14 open reading frame 126           | PREDICTED: Homo sapiens similar to chromosome 14 open reading frame 126 (LOC728752), mRNA [XM_001128360]                                                        | 1.82755 | down | 2.29749 | down | 25.73421   | 48.69814   | 14.27402   | 28.91778   | Detected    | Detected | Detected    | Detected    |
| 7247 | A_23_P253029  | BOK          | Hs.293753 | BCL2-related ovarian killer                               | Homo sapiens BCL2-related ovarian killer (BOK), mRNA [NM_032515]                                                                                                | 1.82510 | down | 2.17436 | down | 1273.85660 | 2407.35230 | 1371.37340 | 2629.37670 | Detected    | Detected | Detected    | Detected    |
| 7248 | A_23_P325631  | SKI          | Hs.656507 | v-ski sarcoma viral oncogene homolog (avian)              | Homo sapiens v-ski sarcoma viral oncogene homolog (avian) (SKI), mRNA [NM_003036]                                                                               | 1.82427 | down | 2.01515 | down | 175.24713  | 331.03394  | 145.92320  | 259.29710  | Detected    | Detected | Detected    | Detected    |
| 7249 | A_33_P3335940 | HN1L         | Hs.513261 | hematological and neurological expressed 1-like           | Homo sapiens hematological and neurological expressed 1-like (HN1L), mRNA [NM_144570]                                                                           | 1.82414 | down | 3.15165 | down | 57.09384   | 107.84013  | 50.85653   | 141.33499  | Detected    | Detected | Detected    | Detected    |
| 7250 | A_33_P3312975 | CLASP1       | Hs.469840 | cytoplasmic linker associated protein 1                   | Homo sapiens cytoplasmic linker associated protein 1 (CLASP1), transcript variant 1, mRNA [NM_015282]                                                           | 1.82346 | down | 2.61731 | down | 58.14604   | 109.78657  | 27.44121   | 63.33207   | Detected    | Detected | Detected    | Detected    |
| 7251 | A_24_P329229  | KCTD7        | Hs.546627 | potassium channel tetramerisation domain containing 7     | Homo sapiens potassium channel tetramerisation domain containing 7 (KCTD7), mRNA [NM_153033]                                                                    | 1.82328 | down | 3.91252 | down | 11.91641   | 22.49742   | 2.83102    | 9.76708    | Compromised | Detected | Compromised | Compromised |
| 7252 | A_33_P3398697 | PICK1        | Hs.180871 | protein interacting with PRKCA 1                          | Homo sapiens protein interacting with PRKCA 1 (PICK1), transcript variant 1, mRNA [NM_012407]                                                                   | 1.82197 | down | 2.02013 | down | 1503.77170 | 2836.98220 | 1226.94900 | 2185.60180 | Detected    | Detected | Detected    | Detected    |
| 7253 | A_32_P103633  | MCM2         | Hs.477481 | minichromosome maintenance complex component 2            | Homo sapiens minichromosome maintenance complex component 2 (MCM2), mRNA [NM_004526]                                                                            | 1.82108 | down | 2.10792 | down | 1604.82690 | 3026.15380 | 1683.70690 | 3129.58450 | Detected    | Detected | Detected    | Detected    |
| 7254 | A_33_P3368375 | RANBP3       | Hs.531752 | RAN binding protein 3                                     | Homo sapiens RAN binding protein 3 (RANBP3), transcript variant RANBP3-d, mRNA [NM_007322]                                                                      | 1.82019 | down | 2.00563 | down | 150.75530  | 284.13327  | 98.06442   | 173.43108  | Detected    | Detected | Detected    | Detected    |
| 7255 | A_23_P77437   | PRMT7        | Hs.712584 | protein arginine methyltransferase 7                      | Homo sapiens protein arginine methyltransferase 7 (PRMT7), mRNA [NM_019023]                                                                                     | 1.81884 | down | 2.25252 | down | 129.87460  | 244.59697  | 80.00851   | 158.91719  | Detected    | Detected | Detected    | Detected    |
| 7256 | A_24_P345846  | ANTXR2       | Hs.162963 | anthrax toxin receptor 2                                  | Homo sapiens anthrax toxin receptor 2 (ANTXR2), transcript variant 1, mRNA [NM_058172]                                                                          | 1.81825 | down | 2.13749 | down | 62.50034   | 117.67095  | 43.03818   | 81.11925   | Detected    | Detected | Detected    | Detected    |
| 7257 | A_32_P226009  | C5orf42      | Hs.586199 | chromosome 5 open reading frame 42                        | Homo sapiens chromosome 5 open reading frame 42 (C5orf42), mRNA [NM_023073]                                                                                     | 1.81753 | down | 2.12352 | down | 152.86406  | 287.68713  | 94.25620   | 176.49504  | Detected    | Detected | Detected    | Detected    |
| 7258 | A_33_P3226228 |              |           |                                                           |                                                                                                                                                                 | 1.81686 | down | 2.88012 | down | 58.87419   | 110.75894  | 47.41797   | 120.42567  | Detected    | Detected | Detected    | Detected    |
| 7259 | A_24_P288323  | DPP9         | Hs.515081 | dipeptidyl-peptidase 9                                    | Homo sapiens dipeptidyl-peptidase 9 (DPP9), mRNA [NM_139159]                                                                                                    | 1.81456 | down | 2.22224 | down | 65.47849   | 123.02740  | 61.39735   | 120.31142  | Detected    | Detected | Detected    | Detected    |
| 7260 | A_33_P3370615 |              |           |                                                           | Putative uncharacterized protein ENSP00000385370 [Source:UniProtKB/TrEMBL;Acc:B5MCU5] [ENST00000406220]                                                         | 1.81310 | down | 2.07053 | down | 42.83526   | 80.41865   | 21.36199   | 39.00223   | Detected    | Detected | Detected    | Detected    |
| 7261 | A_33_P3246935 | CSMD2        | Hs.656915 | CUB and Sushi multiple domains 2                          | Homo sapiens CUB and Sushi multiple domains 2 (CSMD2), mRNA [NM_052896]                                                                                         | 1.81095 | down | 2.40523 | down | 55.48075   | 104.03577  | 42.46431   | 90.06294   | Detected    | Detected | Detected    | Detected    |
| 7262 | A_33_P3335371 | MAML3        | Hs.586165 | mastermind-like 3 (Drosophila)                            | Homo sapiens mastermind-like 3 (Drosophila) (MAML3), mRNA [NM_018717]                                                                                           | 1.80894 | down | 2.29246 | down | 83.73576   | 156.84375  | 46.77410   | 94.55259   | Detected    | Detected | Detected    | Detected    |
| 7263 | A_24_P652700  | CEP152       | Hs.597323 | centrosomal protein 152kDa                                | Homo sapiens centrosomal protein 152kDa (CEP152), mRNA [NM_014985]                                                                                              | 1.80705 | down | 2.00007 | down | 157.53043  | 294.75940  | 122.03239  | 215.22125  | Detected    | Detected | Detected    | Detected    |
| 7264 | A_23_P215913  | CLU          | Hs.436657 | clusterin                                                 | Homo sapiens clusterin (CLU), transcript variant 2, mRNA [NM_203339]                                                                                            | 1.80658 | down | 2.17892 | down | 556.66350  | 1041.31640 | 430.91937  | 827.94867  | Detected    | Detected | Detected    | Detected    |

|      |               |           |           |                                                                    |                                                                                                                                                                                            |         |      |         |      |             |             |            |            |             |          |             |             |
|------|---------------|-----------|-----------|--------------------------------------------------------------------|--------------------------------------------------------------------------------------------------------------------------------------------------------------------------------------------|---------|------|---------|------|-------------|-------------|------------|------------|-------------|----------|-------------|-------------|
| 7265 | A_33_P3283601 | LOC389033 |           | placenta-specific 9 pseudogene                                     | Homo sapiens placenta-specific 9 pseudogene (LOC389033), non-coding RNA [NR_026740]                                                                                                        | 1.80650 | down | 3.13224 | down | 15027.16400 | 28109.15200 | 3204.23540 | 8850.04600 | Detected    | Detected | Detected    | Detected    |
| 7266 | A_23_P56127   | C19orf61  | Hs.466875 | chromosome 19 open reading frame 61                                | Homo sapiens chromosome 19 open reading frame 61 (C19orf61), mRNA [NM_019108]                                                                                                              | 1.79994 | down | 2.26439 | down | 605.10480   | 1127.77470  | 523.98490  | 1046.25180 | Detected    | Detected | Detected    | Detected    |
| 7267 | A_33_P3245575 | GLT25D1   | Hs.418795 | glycosyltransferase 25 domain containing 1                         | Homo sapiens glycosyltransferase 25 domain containing 1 (GLT25D1), mRNA [NM_024556]                                                                                                        | 1.79718 | down | 2.21039 | down | 183.56787   | 341.60275   | 164.88654  | 321.38086  | Detected    | Detected | Detected    | Detected    |
| 7268 | A_23_P635     | PMF1      | Hs.530479 | polyamine-modulated factor 1                                       | Homo sapiens polyamine-modulated factor 1 (PMF1), mRNA [NM_007221]                                                                                                                         | 1.79682 | down | 2.06108 | down | 1711.65320  | 3184.59720  | 1903.50110 | 3459.50880 | Detected    | Detected | Detected    | Detected    |
| 7269 | A_33_P3231602 | ZNF569    | Hs.511848 | zinc finger protein 569                                            | Homo sapiens zinc finger protein 569 (ZNF569), mRNA [NM_152484]                                                                                                                            | 1.79576 | down | 2.42842 | down | 24.17414    | 44.95028    | 6.35017    | 13.59800   | Detected    | Detected | Compromised | Compromised |
| 7270 | A_23_P53176   | FOLR1     | Hs.73769  | folate receptor 1 (adult)                                          | Homo sapiens folate receptor 1 (adult) (FOLR1), transcript variant 1, mRNA [NM_016725]                                                                                                     | 1.79555 | down | 2.97804 | down | 122.53810   | 227.82568   | 58.24822   | 152.96050  | Detected    | Detected | Detected    | Detected    |
| 7271 | A_24_P11315   | OLFML3    | Hs.9315   | olfactomedin-like 3                                                | Homo sapiens olfactomedin-like 3 (OLFML3), mRNA [NM_020190]                                                                                                                                | 1.79088 | down | 2.04354 | down | 1797.04630  | 3332.41750  | 1706.70910 | 3075.44260 | Detected    | Detected | Detected    | Detected    |
| 7272 | A_33_P3329255 |           |           |                                                                    |                                                                                                                                                                                            | 1.78740 | down | 2.03675 | down | 1122.62680  | 2077.73070  | 796.95280  | 1431.31800 | Detected    | Detected | Detected    | Detected    |
| 7273 | A_33_P3243028 | DSPP      | Hs.678914 | dentin sialophosphoprotein                                         | Homo sapiens dentin sialophosphoprotein (DSPP), mRNA [NM_014208]                                                                                                                           | 1.78736 | down | 3.11452 | down | 14.52444    | 26.88087    | 3.14244    | 8.63025    | Detected    | Detected | Compromised | Compromised |
| 7274 | A_33_P3370787 | EPHB2     | Hs.523329 | EPH receptor B2                                                    | Homo sapiens EPH receptor B2 (EPHB2), transcript variant 2, mRNA [NM_004442]                                                                                                               | 1.78644 | down | 2.04676 | down | 179.79773   | 332.58774   | 117.39219  | 211.87056  | Detected    | Detected | Detected    | Detected    |
| 7275 | A_23_P340848  | PTGIR     | Hs.458324 | prostaglandin I2 (prostacyclin) receptor (IP)                      | Homo sapiens prostaglandin I2 (prostacyclin) receptor (IP) (PTGIR), mRNA [NM_000960]                                                                                                       | 1.78477 | down | 2.00813 | down | 2194.47170  | 4055.50880  | 1920.15520 | 3400.11100 | Detected    | Detected | Detected    | Detected    |
| 7276 | A_33_P3396050 | LOC645307 | Hs.558726 | hypothetical LOC645307                                             | PREDICTED: Homo sapiens hypothetical LOC645307 (LOC645307), mRNA [XM_932802]                                                                                                               | 1.78456 | down | 2.98898 | down | 10.94363    | 20.22203    | 5.55514    | 14.64144   | Compromised | Detected | Compromised | Compromised |
| 7277 | A_23_P82503   | PEG10     | Hs.147492 | paternally expressed 10                                            | Homo sapiens paternally expressed 10 (PEG10), transcript variant 1, mRNA [NM_001040152]                                                                                                    | 1.78399 | down | 2.00672 | down | 194.49728   | 359.28503   | 127.21362  | 225.10593  | Detected    | Detected | Detected    | Detected    |
| 7278 | A_23_P71146   | POLD2     | Hs.306791 | polymerase (DNA directed), delta 2, regulatory subunit 50kDa       | Homo sapiens polymerase (DNA directed), delta 2, regulatory subunit 50kDa (POLD2), transcript variant 2, mRNA [NM_006230]                                                                  | 1.78216 | down | 2.07810 | down | 862.28546   | 1591.22530  | 845.49023  | 1549.32130 | Detected    | Detected | Detected    | Detected    |
| 7279 | A_33_P3415087 | CLCN5     | Hs.166486 | chloride channel 5                                                 | Homo sapiens chloride channel 5 (CLCN5), transcript variant 1, mRNA [NM_001127899]                                                                                                         | 1.78063 | down | 2.29761 | down | 127.48760   | 235.05754   | 54.99169   | 111.41358  | Detected    | Detected | Detected    | Detected    |
| 7280 | A_23_P19778   | SLC13A4   | Hs.490241 | solute carrier family 13 (sodium/sulfate symporters), member 4     | Homo sapiens solute carrier family 13 (sodium/sulfate symporters), member 4 (SLC13A4), mRNA [NM_012450]                                                                                    | 1.77899 | down | 2.01336 | down | 184.27333   | 339.44452   | 123.92033  | 220.00356  | Detected    | Detected | Detected    | Detected    |
| 7281 | A_23_P8055    | NRM       | Hs.519993 | nurim (nuclear envelope membrane protein)                          | Homo sapiens nurim (nuclear envelope membrane protein) (NRM), mRNA [NM_007243]                                                                                                             | 1.77686 | down | 2.10641 | down | 498.89360   | 917.89905   | 509.82635  | 946.95730  | Detected    | Detected | Detected    | Detected    |
| 7282 | A_24_P24444   | EXOG      | Hs.517897 | endo/exonuclease (5'-3'), endonuclease G-like                      | Homo sapiens endo/exonuclease (5'-3'), endonuclease G-like (EXOG), nuclear gene encoding mitochondrial protein, transcript variant 1, mRNA [NM_005107]                                     | 1.77505 | down | 2.32176 | down | 13.75980    | 25.29045    | 8.39038    | 17.17770   | Detected    | Detected | Compromised | Detected    |
| 7283 | A_33_P3388283 |           |           |                                                                    | Hydroxymethylglutaryl-CoA lyase, mitochondrial Precursor (HMG-CoA lyase)(HL)/EC 4.1.3.4/(3-hydroxy-3-methylglutarate-CoA lyase) [Source:UniProtKB/Swiss-Prot;Acc:P35914] [ENST00000374483] | 1.77478 | down | 2.14138 | down | 16.31183    | 29.97638    | 3.08823    | 5.83135    | Detected    | Detected | Compromised | Compromised |
| 7284 | A_23_P154708  | HAO1      | Hs.193640 | hydroxyacid oxidase (glycolate oxidase) 1                          | Homo sapiens hydroxyacid oxidase (glycolate oxidase) 1 (HAO1), mRNA [NM_017545]                                                                                                            | 1.77375 | down | 2.36526 | down | 11.00218    | 20.20710    | 3.85606    | 8.06122    | Compromised | Detected | Compromised | Compromised |
| 7285 | A_24_P79054   | TGFB1     | Hs.645227 | transforming growth factor, beta 1                                 | Homo sapiens transforming growth factor, beta 1 (TGFB1), mRNA [NM_000660]                                                                                                                  | 1.77363 | down | 2.13681 | down | 1290.80900  | 2370.60330  | 1484.78210 | 2797.66110 | Detected    | Detected | Detected    | Detected    |
| 7286 | A_33_P3299590 | SRRT      | Hs.111801 | serrate RNA effector molecule homolog (Arabidopsis)                | Homo sapiens serrate RNA effector molecule homolog (Arabidopsis) (SRRT), transcript variant 5, mRNA [NM_001128854]                                                                         | 1.77211 | down | 2.13730 | down | 115.51160   | 211.95819   | 117.85178  | 222.10907  | Detected    | Detected | Detected    | Detected    |
| 7287 | A_23_P340922  | ZNF414    | Hs.515114 | zinc finger protein 414                                            | Homo sapiens zinc finger protein 414 (ZNF414), transcript variant 2, mRNA [NM_032370]                                                                                                      | 1.76889 | down | 2.01562 | down | 149.18155   | 273.24230   | 140.72543  | 250.11923  | Detected    | Detected | Detected    | Detected    |
| 7288 | A_33_P3369844 | CD24      | Hs.644105 | CD24 molecule                                                      | Homo sapiens CD24 molecule (CD24), mRNA [NM_013230]                                                                                                                                        | 1.76864 | down | 2.96482 | down | 27.24082    | 49.88758    | 12.99351   | 33.96960   | Detected    | Detected | Compromised | Detected    |
| 7289 | A_32_P171061  | ASCL2     | Hs.152475 | achaete-scute complex homolog 2 (Drosophila)                       | Homo sapiens achaete-scute complex homolog 2 (Drosophila) (ASCL2), mRNA [NM_005170]                                                                                                        | 1.76850 | down | 3.48618 | down | 12.75135    | 23.35045    | 2.89812    | 8.90905    | Compromised | Detected | Compromised | Compromised |
| 7290 | A_23_P41455   | TRPC3     | Hs.150981 | transient receptor potential cation channel, subfamily C, member 3 | Homo sapiens transient receptor potential cation channel, subfamily C, member 3 (TRPC3), transcript variant 2, mRNA [NM_003305]                                                            | 1.76584 | down | 3.00911 | down | 44.97858    | 82.24138    | 17.32280   | 45.96442   | Detected    | Detected | Detected    | Detected    |
| 7291 | A_24_P120109  | DHX57     | Hs.468226 | DEAH (Asp-Glu-Ala-Asp/His) box polypeptide 57                      | Homo sapiens DEAH (Asp-Glu-Ala-Asp/His) box polypeptide 57 (DHX57), mRNA [NM_198963]                                                                                                       | 1.76416 | down | 3.61046 | down | 12.80315    | 23.38768    | 5.82274    | 18.53768   | Detected    | Detected | Compromised | Detected    |
| 7292 | A_33_P3325429 |           |           |                                                                    | GB                                                                                                                                                                                         | 1.76229 | down | 3.80733 | down | 31.77902    | 57.98956    | 5.84816    | 19.63382   | Detected    | Detected | Compromised | Detected    |
| 7293 | A_23_P390068  | C19orf21  | Hs.439180 | chromosome 19 open reading frame 21                                | Homo sapiens chromosome 19 open reading frame 21 (C19orf21), mRNA [NM_173481]                                                                                                              | 1.76031 | down | 2.85422 | down | 17.87807    | 32.58685    | 4.74147    | 11.93344   | Detected    | Detected | Compromised | Compromised |
| 7294 | A_24_P302584  | SOX11     | Hs.432638 | SRY (sex determining region Y)-box 11                              | Homo sapiens SRY (sex determining region Y)-box 11 (SOX11), mRNA [NM_003106]                                                                                                               | 1.75604 | down | 2.39462 | down | 42.08003    | 76.51428    | 22.66728   | 47.86318   | Detected    | Detected | Detected    | Detected    |
| 7295 | A_23_P132175  | RTN4R     | Hs.30868  | reticulon 4 receptor                                               | Homo sapiens reticulon 4 receptor (RTN4R), mRNA [NM_023004]                                                                                                                                | 1.75586 | down | 2.20132 | down | 43.72976    | 79.50623    | 20.94223   | 40.65098   | Detected    | Detected | Detected    | Detected    |

|      |               |              |           |                                                                                           |                                                                                                                                                        |         |      |         |      |             |             |             |             |             |             |             |             |
|------|---------------|--------------|-----------|-------------------------------------------------------------------------------------------|--------------------------------------------------------------------------------------------------------------------------------------------------------|---------|------|---------|------|-------------|-------------|-------------|-------------|-------------|-------------|-------------|-------------|
| 7296 | A_33_P3313258 | ATAD3B       | Hs.23413  | ATPase family, AAA domain containing 3B                                                   | Homo sapiens ATPase family, AAA domain containing 3B (ATAD3B), mRNA [NM_031921]                                                                        | 1.75559 | down | 2.03164 | down | 543.51420   | 988.02344   | 458.47437   | 821.35000   | Detected    | Detected    | Detected    | Detected    |
| 7297 | A_23_P351837  | KLHL35       | Hs.292451 | kelch-like 35 (Drosophila)                                                                | Homo sapiens kelch-like 35 (Drosophila) (KLHL35), mRNA [NM_001039548]                                                                                  | 1.75220 | down | 2.58791 | down | 77.51599    | 140.63997   | 55.38683    | 126.39268   | Detected    | Detected    | Detected    | Detected    |
| 7298 | A_33_P3303577 | TMEM110      | Hs.705605 | transmembrane protein 110                                                                 | Homo sapiens transmembrane protein 110 (TMEM110), mRNA [NM_198563]                                                                                     | 1.75190 | down | 2.11939 | down | 541.11060   | 981.58386   | 404.63214   | 756.19946   | Detected    | Detected    | Detected    | Detected    |
| 7299 | A_33_P3610768 | LOC100131490 | Hs.718640 | hypothetical LOC100131490                                                                 | Homo sapiens cDNA FLJ42271 fis, clone TKIDN2015788, [AK124265]                                                                                         | 1.74290 | down | 2.00344 | down | 109.59598   | 197.78772   | 74.95221    | 132.41191   | Detected    | Detected    | Detected    | Detected    |
| 7300 | A_33_P3242965 | ATAD3C       | Hs.23413  | ATPase family, AAA domain containing 3C                                                   | Homo sapiens ATPase family, AAA domain containing 3C (ATAD3C), mRNA [NM_001039211]                                                                     | 1.73971 | down | 2.20699 | down | 604.74490   | 1089.38800  | 360.16440   | 700.91675   | Detected    | Detected    | Detected    | Detected    |
| 7301 | A_33_P3370060 | ARHGAP23     | Hs.374446 | Rho GTPase activating protein 23                                                          | Homo sapiens Rho GTPase activating protein 23 (ARHGAP23), mRNA [NM_020876]                                                                             | 1.73943 | down | 2.08520 | down | 124.66121   | 224.52858   | 80.99135    | 148.91937   | Detected    | Detected    | Detected    | Detected    |
| 7302 | A_33_P3226810 | TNFSF10      | Hs.478275 | tumor necrosis factor (ligand) superfamily, member 10                                     | Homo sapiens tumor necrosis factor (ligand) superfamily, member 10 (TNFSF10), mRNA [NM_003810]                                                         | 1.73927 | down | 2.18554 | down | 11.61518    | 20.91834    | 8.39425     | 16.17728    | Compromised | Detected    | Compromised | Detected    |
| 7303 | A_24_P240242  | MAP4         | Hs.517949 | microtubule-associated protein 4                                                          | Homo sapiens microtubule-associated protein 4 (MAP4), transcript variant 1, mRNA [NM_002375]                                                           | 1.73922 | down | 2.05690 | down | 148.69194   | 267.77765   | 100.92059   | 183.04489   | Detected    | Detected    | Detected    | Detected    |
| 7304 | A_24_P108451  | GPI          | Hs.466471 | glucose phosphate isomerase                                                               | Homo sapiens glucose phosphate isomerase (GPI), mRNA [NM_000175]                                                                                       | 1.73844 | down | 2.18310 | down | 29175.50400 | 52518.47000 | 16594.79500 | 31945.63500 | Detected    | Detected    | Detected    | Detected    |
| 7305 | A_33_P3315243 | C17orf72     | Hs.708161 | chromosome 17 open reading frame 72                                                       | Homo sapiens chromosome 17 open reading frame 72 (C17orf72), mRNA [NM_001164257]                                                                       | 1.73528 | down | 2.01372 | down | 59.12350    | 106.23380   | 43.36641    | 77.00476    | Detected    | Detected    | Detected    | Detected    |
| 7306 | A_33_P3386487 |              |           |                                                                                           |                                                                                                                                                        | 1.73385 | down | 3.73176 | down | 29.13532    | 52.30744    | 3.70847     | 12.20323    | Detected    | Detected    | Compromised | Compromised |
| 7307 | A_33_P3241184 |              |           |                                                                                           |                                                                                                                                                        | 1.73215 | down | 2.02432 | down | 206.97758   | 371.22842   | 47.01658    | 83.92579    | Detected    | Detected    | Detected    | Detected    |
| 7308 | A_33_P3420704 | LOC100130131 |           | hypothetical LOC100130131                                                                 | PREDICTED: Homo sapiens hypothetical LOC100130131 (LOC100130131), mRNA [XM_001721580]                                                                  | 1.72837 | down | 2.26956 | down | 26.65978    | 47.71196    | 26.77594    | 53.58603    | Detected    | Detected    | Detected    | Detected    |
| 7309 | A_23_P130811  | ZNF536       | Hs.378901 | zinc finger protein 536                                                                   | Homo sapiens zinc finger protein 536 (ZNF536), mRNA [NM_014717]                                                                                        | 1.72781 | down | 2.14408 | down | 122.53587   | 219.22594   | 111.89851   | 211.55896   | Detected    | Detected    | Detected    | Detected    |
| 7310 | A_24_P13381   | TRPV4        | Hs.506713 | transient receptor potential cation channel, subfamily V, member 4                        | Homo sapiens transient receptor potential cation channel, subfamily V, member 4 (TRPV4), transcript variant 2, mRNA [NM_147204]                        | 1.72584 | down | 2.21863 | down | 46.06806    | 82.32536    | 41.89491    | 81.96199    | Detected    | Detected    | Detected    | Detected    |
| 7311 | A_23_P354791  | NAV2         | Hs.502116 | neuron navigator 2                                                                        | Homo sapiens neuron navigator 2 (NAV2), transcript variant 1, mRNA [NM_182964]                                                                         | 1.72479 | down | 2.31984 | down | 110.14399   | 196.71123   | 52.70222    | 107.80849   | Detected    | Detected    | Detected    | Detected    |
| 7312 | A_33_P3324298 | hCG1817208   | Hs.58456  | hCG1817208                                                                                | PREDICTED: Homo sapiens hCG1817208 (LOC729955), miscRNA [XR_041230]                                                                                    | 1.72380 | down | 2.43770 | down | 319.80267   | 570.82404   | 40.00533    | 85.99321    | Detected    | Detected    | Detected    | Detected    |
| 7313 | A_23_P39392   | C9orf114     | Hs.224137 | chromosome 9 open reading frame 114                                                       | Homo sapiens chromosome 9 open reading frame 114 (C9orf114), mRNA [NM_016390]                                                                          | 1.71879 | down | 2.13788 | down | 141.33714   | 251.54301   | 163.97899   | 309.12900   | Detected    | Detected    | Detected    | Detected    |
| 7314 | A_24_P389608  | C10orf47     | Hs.435775 | chromosome 10 open reading frame 47                                                       | Homo sapiens chromosome 10 open reading frame 47 (C10orf47), mRNA [NM_153296]                                                                          | 1.71794 | down | 2.58857 | down | 11.33406    | 20.16173    | 7.88111     | 17.98927    | Compromised | Compromised | Compromised | Detected    |
| 7315 | A_23_P154675  | SNRPB        | Hs.83753  | small nuclear ribonucleoprotein polypeptides B and B1                                     | Homo sapiens small nuclear ribonucleoprotein polypeptides B and B1 (SNRPB), transcript variant 1, mRNA [NM_198216]                                     | 1.71783 | down | 2.04443 | down | 3965.40840  | 7053.44340  | 4272.79540  | 7702.82470  | Detected    | Detected    | Detected    | Detected    |
| 7316 | A_23_P7896    | DUSP22       | Hs.29106  | dual specificity phosphatase 22                                                           | Homo sapiens dual specificity phosphatase 22 (DUSP22), mRNA [NM_020185]                                                                                | 1.71672 | down | 2.10840 | down | 64.76125    | 115.11891   | 50.52981    | 93.94356    | Detected    | Detected    | Detected    | Detected    |
| 7317 | A_33_P3220247 | TRIM6        | Hs.125300 | tripartite motif-containing 6                                                             | Homo sapiens tripartite motif-containing 6 (TRIM6), transcript variant 1, mRNA [NM_001003818]                                                          | 1.71634 | down | 2.55079 | down | 17.53906    | 31.17050    | 11.66436    | 26.23619    | Detected    | Detected    | Compromised | Detected    |
| 7318 | A_23_P500353  | KCNN2        | Hs.98280  | potassium intermediate/small conductance calcium-activated channel, subfamily N, member 2 | Homo sapiens potassium intermediate/small conductance calcium-activated channel, subfamily N, member 2 (KCNN2), transcript variant 1, mRNA [NM_021614] | 1.71529 | down | 2.01028 | down | 24.71819    | 43.90221    | 9.46648     | 16.78071    | Detected    | Detected    | Compromised | Detected    |
| 7319 | A_24_P250335  | SNRPA        | Hs.466775 | small nuclear ribonucleoprotein polypeptide A                                             | Homo sapiens small nuclear ribonucleoprotein polypeptide A (SNRPA), mRNA [NM_004596]                                                                   | 1.71493 | down | 2.07209 | down | 3799.67850  | 6747.24700  | 3046.85640  | 5567.06540  | Detected    | Detected    | Detected    | Detected    |
| 7320 | A_33_P3370940 |              |           |                                                                                           | Laminin subunit beta-1 Precursor (Laminin B1 chain) [Source:UniProtKB/Swiss-Prot;Acc:P07942] [ENST00000393560]                                         | 1.71414 | down | 3.76602 | down | 16.94696    | 30.07958    | 7.85147     | 26.07350    | Detected    | Detected    | Compromised | Detected    |
| 7321 | A_33_P3420909 | LOC100291610 | Hs.546565 | similar to KIAA1920 protein                                                               | Putative uncharacterized protein ENSP00000343347 Fragment [Source:UniProtKB/TrEMBL;Acc:A6NC53] [ENST00000343310]                                       | 1.71282 | down | 2.18355 | down | 11.25330    | 19.95832    | 8.44350     | 16.25741    | Compromised | Detected    | Compromised | Detected    |
| 7322 | A_33_P3394858 | NCRNA00092   | Hs.434310 | non-protein coding RNA 92                                                                 | Homo sapiens non-protein coding RNA 92 (NCRNA00092), non-coding RNA [NR_024129]                                                                        | 1.71075 | down | 2.36503 | down | 11.10412    | 19.66996    | 3.36806     | 7.02394     | Compromised | Detected    | Compromised | Compromised |
| 7323 | A_33_P3341239 | PCTK1        | Hs.496068 | PCTAIRE protein kinase 1                                                                  | Homo sapiens PCTAIRE protein kinase 1 (PCTK1), transcript variant 1, mRNA [NM_006201]                                                                  | 1.71070 | down | 2.01690 | down | 31811.44300 | 56349.64000 | 27108.66000 | 48212.33200 | Detected    | Detected    | Detected    | Detected    |
| 7324 | A_33_P3370751 | SMURF2       | Hs.515011 | SMAD specific E3 ubiquitin protein ligase 2                                               | Homo sapiens SMAD specific E3 ubiquitin protein ligase 2 (SMURF2), mRNA [NM_022739]                                                                    | 1.70791 | down | 2.21763 | down | 39.23800    | 69.39140    | 22.44535    | 43.89159    | Detected    | Detected    | Detected    | Detected    |
| 7325 | A_23_P24922   | LIPT2        | Hs.591971 | lipoyl(octanoyl) transferase 2 (putative)                                                 | Homo sapiens lipoyl(octanoyl) transferase 2 (putative) (LIPT2), mRNA [NM_001144869]                                                                    | 1.70485 | down | 2.01260 | down | 159.32478   | 281.25640   | 140.91943   | 250.08880   | Detected    | Detected    | Detected    | Detected    |
| 7326 | A_23_P210015  | PTPN18       | Hs.591549 | protein tyrosine phosphatase, non-receptor type 18 (brain-derived)                        | Homo sapiens protein tyrosine phosphatase, non-receptor type 18 (brain-derived) (PTPN18), transcript variant 1, mRNA [NM_014369]                       | 1.70291 | down | 2.13086 | down | 507.99396   | 895.74060   | 425.12710   | 798.80090   | Detected    | Detected    | Detected    | Detected    |

|      |               |              |           |                                                                   |         |      |          |      |            |            |            |            |             |             |             |              |
|------|---------------|--------------|-----------|-------------------------------------------------------------------|---------|------|----------|------|------------|------------|------------|------------|-------------|-------------|-------------|--------------|
| 7327 | A_23_P319895  | SETD1B       | Hs.507122 | SET domain containing 1B (SETD1B), mRNA [NM_015048]               | 1.69822 | down | 2.00038  | down | 239.87561  | 421.80637  | 110.66592  | 195.20564  | Detected    | Detected    | Detected    | Detected     |
| 7328 | A_23_P6381    | MN1          | Hs.268515 | meningioma (disrupted in balanced translocation) 1                | 1.69679 | down | 2.61865  | down | 47.89284   | 84.14571   | 36.50382   | 84.29112   | Detected    | Detected    | Detected    | Detected     |
| 7329 | A_23_P210131  | LOC400987    | Hs.646318 | similar to ankyrin repeat domain 36                               | 1.69254 | down | 2.02250  | down | 164.48074  | 288.26126  | 121.74620  | 217.12500  | Detected    | Detected    | Detected    | Detected     |
| 7330 | A_23_P109593  | TBC1D22A     | Hs.435044 | TBC1 domain family, member 22A                                    | 1.69127 | down | 2.04484  | down | 580.68810  | 1016.92523 | 384.67285  | 693.61310  | Detected    | Detected    | Detected    | Detected     |
| 7331 | A_32_P193583  | C4orf39      | Hs.178648 | chromosome 4 open reading frame 39                                | 1.68280 | down | 2.89266  | down | 24.00664   | 41.83076   | 16.72947   | 42.67223   | Detected    | Detected    | Detected    | Detected     |
| 7332 | A_33_P3289835 |              | Hs.21938  |                                                                   | 1.68089 | down | 2.00231  | down | 338.21756  | 588.66595  | 323.71600  | 571.55994  | Detected    | Detected    | Detected    | Detected     |
| 7333 | A_23_P357351  | MPV17L       | Hs.720673 | MPV17 mitochondrial membrane protein-like                         | 1.67544 | down | 2.42043  | down | 16.45169   | 28.54130   | 3.09284    | 6.60109    | Detected    | Detected    | Compromised | Compromised  |
| 7334 | A_23_P200741  | DPT          | Hs.80552  | dermatopontin                                                     | 1.67531 | down | 2.02225  | down | 435.32822  | 755.17145  | 384.55182  | 685.73340  | Detected    | Detected    | Detected    | Detected     |
| 7335 | A_33_P3247659 | TMEM87A      | Hs.597178 | transmembrane protein 87A                                         | 1.67361 | down | 2.17464  | down | 118.92278  | 206.08723  | 74.21664   | 142.31610  | Detected    | Detected    | Detected    | Detected     |
| 7336 | A_33_P3362981 | KCTD5        | Hs.61960  | potassium channel tetramerisation domain containing 5             | 1.67250 | down | 2.28977  | down | 247.92421  | 429.35748  | 148.92030  | 300.68460  | Detected    | Detected    | Detected    | Detected     |
| 7337 | A_33_P3315634 | NKX1-1       |           | NK1 homeobox 1                                                    | 1.66912 | down | 2.18438  | down | 68.75529   | 118.83009  | 28.70459   | 55.28974   | Detected    | Detected    | Detected    | Detected     |
| 7338 | A_33_P3773195 | LOC285762    | Hs.571063 | hypothetical protein LOC285762                                    | 1.66751 | down | 2.56279  | down | 17.66036   | 30.49300   | 7.71245    | 17.42893   | Detected    | Detected    | Compromised | Detected     |
| 7339 | A_33_P3785051 |              | Hs.719432 |                                                                   | 1.66663 | down | 2.78812  | down | 36.41463   | 62.84164   | 5.81634    | 14.29968   | Detected    | Detected    | Compromised | Compromised  |
| 7340 | A_33_P3346292 |              |           |                                                                   | 1.66445 | down | 4.04345  | down | 12.87114   | 22.18302   | 5.70485    | 20.34052   | Detected    | Detected    | Compromised | Detected     |
| 7341 | A_33_P3728979 | FAM151B      | Hs.338182 | family with sequence similarity 151, member B                     | 1.66434 | down | 2.37283  | down | 40.66852   | 70.08656   | 24.84995   | 51.99453   | Detected    | Detected    | Detected    | Detected     |
| 7342 | A_33_P3424832 |              |           |                                                                   | 1.65368 | down | 2.02294  | down | 74.77910   | 128.04561  | 56.64824   | 101.04981  | Detected    | Detected    | Detected    | Detected     |
| 7343 | A_32_P183442  |              | Hs.522180 |                                                                   | 1.65344 | down | 3.62746  | down | 326.98220  | 559.81640  | 85.47798   | 273.41540  | Detected    | Detected    | Detected    | Detected     |
| 7344 | A_33_P3821660 | C9orf86      | Hs.370555 | chromosome 9 open reading frame 86                                | 1.65070 | down | 2.35146  | down | 188.06755  | 321.45142  | 175.11009  | 363.08963  | Detected    | Detected    | Detected    | Detected     |
| 7345 | A_23_P92602   | ABCA11P      | Hs.428360 | ATP-binding cassette, sub-family A (ABC1), member 11 (pseudogene) | 1.65068 | down | 2.17841  | down | 41.55683   | 71.02933   | 22.91608   | 44.01949   | Detected    | Detected    | Detected    | Detected     |
| 7346 | A_33_P3344292 | LOC644925    | Hs.680372 | hypothetical LOC644925                                            | 1.64940 | down | 5.53820  | down | 33.93909   | 57.96402   | 4.79489    | 23.41600   | Detected    | Detected    | Compromised | Detected     |
| 7347 | A_24_P359405  | DTX3         | Hs.32374  | deltex homolog 3 (Drosophila)                                     | 1.64281 | down | 2.22768  | down | 23.59053   | 40.12909   | 18.84337   | 37.01489   | Detected    | Detected    | Detected    | Detected     |
| 7348 | A_23_P111395  | SLC22A2      | Hs.436385 | solute carrier family 22 (organic cation transporter), member 2   | 1.64079 | down | 11.56630 | down | 3.69828    | 6.28326    | 4.19068    | 42.74104   | Compromised | Compromised | Compromised | Not Detected |
| 7349 | A_24_P408704  | DOCK2        | Hs.586174 | dedicator of cytokinesis 2                                        | 1.63827 | down | 2.05673  | down | 45.91095   | 77.88161   | 39.95910   | 72.47004   | Detected    | Detected    | Detected    | Detected     |
| 7350 | A_24_P338858  | C21orf90     | Hs.592163 | chromosome 21 open reading frame 90                               | 1.63151 | down | 2.27467  | down | 12.50035   | 21.11767   | 8.40043    | 16.84946   | Compromised | Detected    | Compromised | Detected     |
| 7351 | A_33_P3368313 | MT1H         | Hs.438462 | metallothionein 1H                                                | 1.62981 | down | 2.39142  | down | 21.02961   | 35.48952   | 5.87094    | 12.38024   | Detected    | Detected    | Compromised | Detected     |
| 7352 | A_23_P354591  | FAM125B      | Hs.162659 | family with sequence similarity 125, member B                     | 1.62865 | down | 2.31001  | down | 168.54977  | 284.24167  | 119.34087  | 243.09122  | Detected    | Detected    | Detected    | Detected     |
| 7353 | A_33_P3293138 | LOC100132972 | Hs.586959 | similar to synaptophysin-like 1                                   | 1.62780 | down | 2.40616  | down | 29.04063   | 48.94862   | 2.39762    | 5.08711    | Detected    | Detected    | Compromised | Compromised  |
| 7354 | A_33_P3391970 |              |           |                                                                   | 1.62561 | down | 2.60729  | down | 89.06776   | 149.92369  | 3.00688    | 6.91307    | Detected    | Detected    | Compromised | Compromised  |
| 7355 | A_23_P316460  | C7orf29      | Hs.655915 | chromosome 7 open reading frame 29                                | 1.62561 | down | 2.42959  | down | 34.89461   | 58.73642   | 17.08951   | 36.61239   | Detected    | Detected    | Detected    | Detected     |
| 7356 | A_23_P425750  | ARMC6        | Hs.77876  | armadillo repeat containing 6                                     | 1.62535 | down | 2.00760  | down | 4306.53660 | 7247.84130 | 1153.67640 | 2042.33280 | Detected    | Detected    | Detected    | Detected     |

|      |               |              |           |                                                                                     |                                                                                                                                             |         |      |          |      |           |            |           |            |             |             |             |              |
|------|---------------|--------------|-----------|-------------------------------------------------------------------------------------|---------------------------------------------------------------------------------------------------------------------------------------------|---------|------|----------|------|-----------|------------|-----------|------------|-------------|-------------|-------------|--------------|
| 7357 | A_23_P216355  | NFKBIL2      | Hs.675285 | nuclear factor of kappa light polypeptide gene enhancer in B-cells inhibitor-like 2 | Homo sapiens nuclear factor of kappa light polypeptide gene enhancer in B-cells inhibitor-like 2 (NFKBIL2), mRNA [NM_013432]                | 1.62451 | down | 2.00806  | down | 146.05565 | 245.68253  | 125.42364 | 222.08603  | Detected    | Detected    | Detected    | Detected     |
| 7358 | A_23_P150064  | MMRN2        | Hs.524479 | multimerin 2                                                                        | Homo sapiens multimerin 2 (MMRN2), mRNA [NM_024756]                                                                                         | 1.62446 | down | 2.37908  | down | 208.78930 | 351.19653  | 111.04121 | 232.94820  | Detected    | Detected    | Detected    | Detected     |
| 7359 | A_23_P58770   | HAND1        | Hs.152531 | heart and neural crest derivatives expressed 1                                      | Homo sapiens heart and neural crest derivatives expressed 1 (HAND1), mRNA [NM_004821]                                                       | 1.62143 | down | 2.63830  | down | 28.29601  | 47.50694   | 4.04381   | 9.40762    | Detected    | Detected    | Compromised | Compromised  |
| 7360 | A_23_P41246   | MFSO10       | Hs.632581 | major facilitator superfamily domain containing 10                                  | Homo sapiens major facilitator superfamily domain containing 10 (MFSO10), transcript variant 1, mRNA [NM_001120]                            | 1.61788 | down | 2.19170  | down | 779.19867 | 1305.34800 | 708.66260 | 1369.57520 | Detected    | Detected    | Detected    | Detected     |
| 7361 | A_24_P302038  | FOHSD2       | Hs.577053 | FCH and double SH3 domains 2                                                        | Homo sapiens FCH and double SH3 domains 2 (FOHSD2), mRNA [NM_014824]                                                                        | 1.61661 | down | 2.28426  | down | 23.84005  | 39.90657   | 18.82313  | 37.91436   | Detected    | Detected    | Detected    | Detected     |
| 7362 | A_33_P3298861 | SLC12A8      | Hs.658514 | solute carrier family 12 (potassium/chloride transporters), member 8                | Homo sapiens solute carrier family 12 (potassium/chloride transporters), member 8 (SLC12A8), mRNA [NM_024628]                               | 1.61522 | down | 2.08275  | down | 80.22947  | 134.18326  | 58.67201  | 107.75381  | Detected    | Detected    | Detected    | Detected     |
| 7363 | A_33_P3222653 | LOC100131366 | Hs.147881 | hypothetical protein LOC100131366                                                   | Homo sapiens cDNA clone IMAGE:4826545, [BC035396]                                                                                           | 1.61299 | down | 2.92866  | down | 15.31397  | 25.57720   | 8.91013   | 23.01011   | Detected    | Detected    | Compromised | Detected     |
| 7364 | A_23_P315964  | UMODL1       | Hs.242520 | uromodulin-like 1                                                                   | Homo sapiens uromodulin-like 1 (UMODL1), transcript variant 2, mRNA [NM_173568]                                                             | 1.61125 | down | 4.09365  | down | 13.40429  | 22.36356   | 2.70668   | 9.77041    | Detected    | Detected    | Compromised | Compromised  |
| 7365 | A_33_P3312182 | C10orf47     | Hs.435775 | chromosome 10 open reading frame 47                                                 | Homo sapiens chromosome 10 open reading frame 47 (C10orf47), mRNA [NM_153256]                                                               | 1.60476 | down | 2.22813  | down | 29.93525  | 49.74223   | 23.45097  | 46.07514   | Detected    | Detected    | Detected    | Detected     |
| 7366 | A_33_P3356886 | DENN2C       | Hs.654928 | DENN/MADD domain containing 2C                                                      | Homo sapiens DENN/MADD domain containing 2C (DENN2C), mRNA [NM_189459]                                                                      | 1.59731 | down | 3.20058  | down | 11.65748  | 19.28087   | 7.34082   | 20.71753   | Compromised | Compromised | Compromised | Detected     |
| 7367 | A_33_P3308332 | PLEKHB1      | Hs.445489 | pleckstrin homology domain containing, family B (evectins) member 1                 | Homo sapiens pleckstrin homology domain containing, family B (evectins) member 1 (PLEKHB1), transcript variant 1, mRNA [NM_021200]          | 1.59628 | down | 3.87018  | down | 15.48990  | 25.60292   | 7.17180   | 24.47511   | Detected    | Detected    | Compromised | Detected     |
| 7368 | A_23_P371865  | CDYL2        | Hs.373908 | chromodomain protein, Y-like 2                                                      | Homo sapiens chromodomain protein, Y-like 2 (CDYL2), mRNA [NM_152342]                                                                       | 1.59602 | down | 2.09173  | down | 136.71560 | 225.93764  | 120.54594 | 222.34265  | Detected    | Detected    | Detected    | Detected     |
| 7369 | A_33_P3302354 | CABIN1       | Hs.517478 | calcineurin binding protein 1                                                       | Homo sapiens calcineurin binding protein 1 (CABIN1), mRNA [NM_012295]                                                                       | 1.59542 | down | 2.02731  | down | 167.97328 | 277.49094  | 260.64008 | 465.93567  | Detected    | Detected    | Detected    | Detected     |
| 7370 | A_24_P6864    |              |           |                                                                                     | Putative olfactory receptor 7A2 [Source:UniProtKB/Swiss-Prot;Acc:Q8NGA2] [ENST00000304105]                                                  | 1.59483 | down | 3.29517  | down | 46.42535  | 76.66612   | 8.76962   | 25.48146   | Detected    | Detected    | Compromised | Detected     |
| 7371 | A_33_P3331095 |              | Hs.489603 |                                                                                     | Ataxin-7-like protein 1 (Ataxin-7-like protein 4) [Source:UniProtKB/Swiss-Prot;Acc:Q9JLK2] [ENST00000388807]                                | 1.59435 | down | 2.12007  | down | 55.75472  | 92.04450   | 40.07904  | 74.92622   | Detected    | Detected    | Detected    | Detected     |
| 7372 | A_23_P322395  | ZSCAN1       | Hs.643437 | zinc finger and SCAN domain containing 1                                            | Homo sapiens zinc finger and SCAN domain containing 1 (ZSCAN1), mRNA [NM_182572]                                                            | 1.59105 | down | 2.98864  | down | 46.95944  | 77.36401   | 6.64628   | 17.51528   | Detected    | Detected    | Compromised | Detected     |
| 7373 | A_23_P211227  | POFUT2       | Hs.592164 | protein O-fucosyltransferase 2                                                      | Homo sapiens protein O-fucosyltransferase 2 (POFUT2), transcript variant 3, mRNA [NM_133635]                                                | 1.59085 | down | 2.05348  | down | 215.14530 | 354.39944  | 237.84918 | 430.68243  | Detected    | Detected    | Detected    | Detected     |
| 7374 | A_33_P3389599 |              | Hs.721707 |                                                                                     | chromosome 21 open reading frame 81 (C21orf81), non-coding RNA [Source:RefSeq;DNA-Acc:NR_027270] [ENST00000415250]                          | 1.58992 | down | 2.25981  | down | 20.18729  | 33.23436   | 9.55626   | 19.04255   | Detected    | Detected    | Compromised | Detected     |
| 7375 | A_33_P3480395 | FLJ30901     |           | hypothetical protein FLJ30901                                                       | Homo sapiens cDNA FLJ30901 fis, clone FEBRA2005778, [AK055463]                                                                              | 1.58759 | down | 5.73304  | down | 26.32611  | 43.27698   | 3.44658   | 17.42361   | Detected    | Detected    | Compromised | Compromised  |
| 7376 | A_33_P3334384 | LOC100132774 | Hs.655569 | hypothetical LOC100132774                                                           | Homo sapiens cDNA clone IMAGE:5485613, partial cds [BC073819]                                                                               | 1.58661 | down | 2.17590  | down | 27.57604  | 45.30392   | 21.36378  | 40.99035   | Detected    | Detected    | Detected    | Detected     |
| 7377 | A_33_P3267822 | MICAL3       | Hs.528024 | microtubule associated monooxygenase, calponin and LIM domain containing 3          | Homo sapiens microtubule associated monooxygenase, calponin and LIM domain containing 3 (MICAL3), transcript variant 3, mRNA [NM_001122731] | 1.58516 | down | 2.01877  | down | 7.65179   | 12.55938   | 11.79714  | 21.00049   | Compromised | Compromised | Compromised | Detected     |
| 7378 | A_23_P1043    | C1orf106     | Hs.518997 | chromosome 1 open reading frame 106                                                 | Homo sapiens chromosome 1 open reading frame 106 (C1orf106), transcript variant 1, mRNA [NM_018265]                                         | 1.58502 | down | 22.30240 | down | 2.46684   | 4.04864    | 3.11176   | 61.19597   | Compromised | Compromised | Compromised | Not Detected |
| 7379 | A_32_P150300  | LOC100131646 | Hs.713783 | hypothetical LOC100131646                                                           | PREDICTED: Homo sapiens hypothetical LOC100131646 (LOC100131646), mRNA [XM_001714700]                                                       | 1.58498 | down | 2.48482  | down | 162.19115 | 266.18472  | 88.10043  | 193.03639  | Detected    | Detected    | Detected    | Detected     |
| 7380 | A_33_P3402188 | TAS2R19      | Hs.687025 | taste receptor, type 2, member 19                                                   | Homo sapiens MSTP058 mRNA, complete cds. [AF116728]                                                                                         | 1.58453 | down | 8.07747  | down | 6.80735   | 11.16893   | 4.67218   | 33.27824   | Compromised | Compromised | Compromised | Detected     |
| 7381 | A_33_P3214501 | AEN          | Hs.436102 | apoptosis enhancing nuclease                                                        | Homo sapiens apoptosis enhancing nuclease (AEN), mRNA [NM_022767]                                                                           | 1.58185 | down | 2.32228  | down | 537.58026 | 880.52660  | 388.66943 | 795.90460  | Detected    | Detected    | Detected    | Detected     |
| 7382 | A_33_P3377256 | LOC388906    | Hs.679422 | hypothetical protein LOC388906                                                      | Homo sapiens hypothetical gene supported by BC039496, mRNA (cDNA clone IMAGE:5549330), partial cds [BC039496]                               | 1.58104 | down | 2.83870  | down | 16.25757  | 26.61538   | 3.37570   | 8.44984    | Detected    | Detected    | Compromised | Compromised  |
| 7383 | A_33_P3383724 | TRIM61       | Hs.654633 | tripartite motif-containing 61                                                      | Homo sapiens tripartite motif-containing 61 (TRIM61), mRNA [NM_001012414]                                                                   | 1.57910 | down | 2.52927  | down | 28.86392  | 47.19510   | 16.20701  | 36.14628   | Detected    | Detected    | Detected    | Detected     |
| 7384 | A_33_P3283247 | GPSM1        | Hs.239370 | G-protein signaling modulator 1 (AGS3-like, C. elegans)                             | Homo sapiens G-protein signaling modulator 1 (AGS3-like, C. elegans) (GPSM1), transcript variant 2, mRNA [NM_015597]                        | 1.57850 | down | 2.94290  | down | 451.73715 | 738.35000  | 129.69504 | 336.56116  | Detected    | Detected    | Detected    | Detected     |
| 7385 | A_33_P3394789 |              |           |                                                                                     |                                                                                                                                             | 1.57229 | down | 2.19445  | down | 124.58888 | 202.83565  | 82.78108  | 160.18498  | Detected    | Detected    | Detected    | Detected     |



|      |               |              |           |                                                                                                             |                                                                                                                                                                                                    |         |      |         |      |            |            |            |             |             |             |             |             |
|------|---------------|--------------|-----------|-------------------------------------------------------------------------------------------------------------|----------------------------------------------------------------------------------------------------------------------------------------------------------------------------------------------------|---------|------|---------|------|------------|------------|------------|-------------|-------------|-------------|-------------|-------------|
| 7386 | A_33_P3323934 | LOC100128230 | Hs.712075 | similar to JTV1                                                                                             | PREDICTED: Homo sapiens similar to JTV1 (LOC100128230), miscRNA [XR_037867]                                                                                                                        | 1.56889 | down | 7.14016 | down | 37.85825   | 61.50152   | 7.62118    | 47.98388    | Detected    | Detected    | Compromised | Detected    |
| 7387 | A_33_P3371999 | TPPP         | Hs.481466 | tubulin polymerization promoting protein                                                                    | Homo sapiens tubulin polymerization promoting protein (TPPP), mRNA [NM_007030]                                                                                                                     | 1.56706 | down | 2.03763 | down | 50.96421   | 82.69587   | 25.10345   | 45.10500    | Detected    | Detected    | Detected    | Detected    |
| 7388 | A_33_P3342917 | SYNGR2       | Hs.464210 | synaptogyrin 2                                                                                              | Homo sapiens synaptogyrin 2 (SYNGR2), mRNA [NM_004710]                                                                                                                                             | 1.56697 | down | 2.55173 | down | 42.43247   | 68.84823   | 26.34781   | 59.28491    | Detected    | Detected    | Detected    | Detected    |
| 7389 | A_33_P3780572 | LOC401164    | Hs.435756 | hypothetical gene supported by AY494056                                                                     | Homo sapiens cDNA FLJ38649 fis, clone HHDP2007302 [AK095968]                                                                                                                                       | 1.56617 | down | 2.55288 | down | 78.29803   | 126.97641  | 26.30592   | 59.21739    | Detected    | Detected    | Detected    | Detected    |
| 7390 | A_33_P3236813 | GPR19        | Hs.657862 | G protein-coupled receptor 19                                                                               | Homo sapiens G protein-coupled receptor 19 (GPR19), mRNA [NM_006143]                                                                                                                               | 1.56504 | down | 2.28490 | down | 44.41781   | 71.98067   | 22.49988   | 45.33276    | Detected    | Detected    | Detected    | Detected    |
| 7391 | A_33_P3321996 | LOC100287359 | Hs.720549 | hypothetical protein LOC100287359                                                                           | PREDICTED: Homo sapiens hypothetical protein LOC100287359, transcript variant 2 (LOC100287359), mRNA [XM_002342166]                                                                                | 1.55998 | down | 2.39793 | down | 15.26514   | 24.65774   | 17.46673   | 36.93295    | Detected    | Detected    | Detected    | Detected    |
| 7392 | A_33_P3420078 |              |           |                                                                                                             | Low-density lipoprotein receptor-related protein 11 Precursor [Source:UniProtKB/Swiss-Prot;Acc:Q86V24] [ENST00000367368]                                                                           | 1.55454 | down | 2.64061 | down | 40.32068   | 64.90261   | 18.02180   | 41.96307    | Detected    | Detected    | Detected    | Detected    |
| 7393 | A_23_P401472  | CHRM3        | Hs.7138   | cholinergic receptor, muscarinic 3                                                                          | Homo sapiens cholinergic receptor, muscarinic 3 (CHRM3), mRNA [NM_000740]                                                                                                                          | 1.55226 | down | 2.90884 | down | 7.83300    | 12.59001   | 5.35835    | 13.74409    | Compromised | Compromised | Compromised | Detected    |
| 7394 | A_23_P112220  | INSL4        | Hs.418506 | insulin-like 4 (placenta)                                                                                   | Homo sapiens insulin-like 4 (placenta) (INSL4), mRNA [NM_002195]                                                                                                                                   | 1.54464 | down | 5.05430 | down | 2.84537    | 4.55091    | 3.25192    | 14.49325    | Compromised | Compromised | Compromised | Detected    |
| 7395 | A_33_P3358824 | PLOD1        | Hs.75093  | procollagen-lysine 1, 2-oxoglutarate 5-dioxygenase 1                                                        | Homo sapiens procollagen-lysine 1, 2-oxoglutarate 5-dioxygenase 1 (PLOD1), mRNA [NM_000302]                                                                                                        | 1.54214 | down | 2.19388 | down | 212.60706  | 339.49503  | 173.96407  | 336.54068   | Detected    | Detected    | Detected    | Detected    |
| 7396 | A_33_P3329712 |              |           |                                                                                                             | Putative uncharacterized protein ENSP00000349893, Fragment [Source:UniProtKB/TrEMBL;Acc:AGNIQ0] [ENST00000357170]                                                                                  | 1.54170 | down | 2.70418 | down | 20.14880   | 32.16499   | 5.56469    | 13.26913    | Detected    | Detected    | Compromised | Compromised |
| 7397 | A_23_P5200    | NPHS1        | Hs.122186 | nephrosis 1, congenital, Finnish type (nephin)                                                              | Homo sapiens nephrosis 1, congenital, Finnish type (nephin) (NPHS1), mRNA [NM_004646]                                                                                                              | 1.52815 | down | 2.79399 | down | 28.92750   | 45.77320   | 21.24429   | 52.33985    | Detected    | Detected    | Detected    | Detected    |
| 7398 | A_23_P102462  | FBLN7        | Hs.437696 | fibulin 7                                                                                                   | Homo sapiens fibulin 7 (FBLN7), transcript variant 1, mRNA [NM_153214]                                                                                                                             | 1.52571 | down | 2.05777 | down | 102.20268  | 161.46074  | 96.64423   | 175.36302   | Detected    | Detected    | Detected    | Detected    |
| 7399 | A_23_P70127   | TMED9        | Hs.279929 | transmembrane emp24 protein transport domain containing 9                                                   | Homo sapiens transmembrane emp24 protein transport domain containing 9 (TMED9), mRNA [NM_017510]                                                                                                   | 1.52566 | down | 2.05024 | down | 3480.57980 | 5498.46340 | 7318.20200 | 13230.44600 | Detected    | Detected    | Detected    | Detected    |
| 7400 | A_23_P77980   | SLC4A1       | Hs.443948 | solute carrier family 4, anion exchanger, member 1 (erythrocyte membrane protein band 3, Diego blood group) | Homo sapiens solute carrier family 4, anion exchanger, member 1 (erythrocyte membrane protein band 3, Diego blood group) (SLC4A1), mRNA [NM_000342]                                                | 1.52132 | down | 2.02760 | down | 470.94586  | 741.86320  | 87.11764   | 155.75940   | Detected    | Detected    | Detected    | Detected    |
| 7401 | A_33_P3345812 | GPER         | Hs.20961  | G protein-coupled estrogen receptor 1                                                                       | Homo sapiens G protein-coupled estrogen receptor 1 (GPER), transcript variant 3, mRNA [NM_001039966]                                                                                               | 1.51971 | down | 2.04969 | down | 164.18349  | 258.35828  | 162.74919  | 294.15286   | Detected    | Detected    | Detected    | Detected    |
| 7402 | A_33_P3272628 |              |           |                                                                                                             | High affinity immunoglobulin epsilon receptor subunit gamma Precursor (IgE Fc receptor subunit gamma)(FcεRI gamma)(Fc-epsilon RI-gamma) [Source:UniProtKB/Swiss-Prot;Acc:P30273] [ENST00000367992] | 1.51816 | down | 3.04206 | down | 29.45701   | 46.30628   | 7.83257    | 20.47408    | Detected    | Detected    | Compromised | Detected    |
| 7403 | A_24_P109644  | LOC220077    | Hs.503160 | docking protein 1-like protein                                                                              | PREDICTED: Homo sapiens docking protein 1-like protein (LOC220077), miscRNA [XR_017002]                                                                                                            | 1.51626 | down | 2.05794 | down | 134.98082  | 211.92330  | 76.44312   | 138.71920   | Detected    | Detected    | Detected    | Detected    |
| 7404 | A_23_P143006  | PRLH         | Hs.247710 | prolactin releasing hormone                                                                                 | Homo sapiens prolactin releasing hormone (PRLH), mRNA [NM_015893]                                                                                                                                  | 1.51244 | down | 2.02404 | down | 90.51924   | 141.75974  | 41.32875   | 73.76270    | Detected    | Detected    | Detected    | Detected    |
| 7405 | A_23_P355776  |              | Hs.722814 |                                                                                                             | Putative uncharacterized protein C20orf69 [Source:UniProtKB/Swiss-Prot;Acc:Q0V47] [ENST00000307499]                                                                                                | 1.51102 | down | 2.49842 | down | 13.01365   | 20.36121   | 4.74201    | 10.44705    | Compromised | Detected    | Compromised | Compromised |
| 7406 | A_23_P630     | MSTO1        | Hs.656547 | misato homolog 1 (Drosophila)                                                                               | Homo sapiens misato homolog 1 (Drosophila) (MSTO1), mRNA [NM_018116]                                                                                                                               | 1.50469 | down | 2.04055 | down | 251.57030  | 391.95752  | 257.35040  | 463.06137   | Detected    | Detected    | Detected    | Detected    |
| 7407 | A_24_P77947   | CCDC132      | Hs.222282 | coiled-coil domain containing 132                                                                           | Homo sapiens coiled-coil domain containing 132 (CCDC132), transcript variant 2, mRNA [NM_024553]                                                                                                   | 1.50277 | down | 2.05941 | down | 22.23203   | 34.59441   | 11.70854   | 21.26237    | Detected    | Detected    | Compromised | Detected    |
| 7408 | A_24_P84340   | MAST4        | Hs.595458 | microtubule associated serine/threonine kinase family member 4 (MAST4)                                      | Homo sapiens microtubule associated serine/threonine kinase family member 4 (MAST4), transcript variant 2, mRNA [NM_198828]                                                                        | 1.50125 | down | 2.42393 | down | 14.11591   | 21.94290   | 5.91630    | 12.64548    | Compromised | Detected    | Compromised | Compromised |
| 7409 | A_33_P3298539 | APOA1        | Hs.93194  | apolipoprotein A-1                                                                                          | Homo sapiens apolipoprotein A-1 (APOA1), mRNA [NM_000039]                                                                                                                                          | 1.50058 | down | 3.14624 | down | 41.91166   | 65.12178   | 22.90666   | 63.55051    | Detected    | Detected    | Detected    | Detected    |
| 7410 | A_33_P3345623 | RREB1        | Hs.298248 | ras responsive element binding protein 1                                                                    | Homo sapiens ras responsive element binding protein 1 (RREB1), transcript variant 1, mRNA [NM_001003699]                                                                                           | 1.49927 | down | 6.13866 | down | 19.60573   | 30.43653   | 5.63147    | 30.48323    | Detected    | Detected    | Compromised | Detected    |
| 7411 | A_33_P3347937 | HSF1         | Hs.530227 | heat shock transcription factor 1                                                                           | Homo sapiens heat shock transcription factor 1 (HSF1), mRNA [NM_005526]                                                                                                                            | 1.49593 | down | 2.01425 | down | 26.97747   | 41.78755   | 28.18115   | 50.05398    | Detected    | Detected    | Detected    | Detected    |
| 7412 | A_33_P3404448 | SNRNP48      | Hs.13386  | small nuclear ribonucleoprotein 48kDa (U11/U12)                                                             | Homo sapiens small nuclear ribonucleoprotein 48kDa (U11/U12) (SNRNP48), mRNA [NM_152551]                                                                                                           | 1.49145 | down | 3.07220 | down | 102.19640  | 157.82576  | 49.68260   | 134.59195   | Detected    | Detected    | Detected    | Detected    |
| 7413 | A_23_P216340  | SLA          | Hs.75367  | Src-like-adaptor                                                                                            | Homo sapiens Src-like-adaptor (SLA), transcript variant 1, mRNA [NM_001045556]                                                                                                                     | 1.49135 | down | 3.37373 | down | 25.17246   | 38.87204   | 7.51324    | 22.35128    | Detected    | Detected    | Compromised | Detected    |
| 7414 | A_24_P139665  | HPCAL4       | Hs.524688 | hippocalcin like 4                                                                                          | Homo sapiens hippocalcin like 4 (HPCAL4), mRNA [NM_016257]                                                                                                                                         | 1.48968 | down | 9.70535 | down | 2.57799    | 3.97657    | 2.83974    | 24.30277    | Compromised | Compromised | Compromised | Detected    |

|      |               |              |           |                                                                                   |                                                                                                                                   |         |      |          |      |            |            |           |            |             |             |             |              |
|------|---------------|--------------|-----------|-----------------------------------------------------------------------------------|-----------------------------------------------------------------------------------------------------------------------------------|---------|------|----------|------|------------|------------|-----------|------------|-------------|-------------|-------------|--------------|
| 7415 | A_32_P385645  | OR10J3       | Hs.553833 | olfactory receptor, family 10, subfamily J, member 3                              | Homo sapiens olfactory receptor, family 10, subfamily J, member 3 (OR10J3), mRNA [NM_001004467]                                   | 1.48919 | down | 2.44774  | down | 17.48092   | 26.95548   | 3.08472   | 6.65805    | Detected    | Detected    | Compromised | Compromised  |
| 7416 | A_33_P3378630 | LOC100131195 | Hs.650844 | hypothetical protein LOC100131195                                                 | Homo sapiens cDNA FLJ40424 fis, clone TEST12039026, [AK097743]                                                                    | 1.48570 | down | 4.17178  | down | 12.63663   | 19.43993   | 2.79949   | 10.29829   | Compromised | Detected    | Compromised | Compromised  |
| 7417 | A_33_P3302025 | ADAMTSL1     | Hs.522019 | ADAMTS-like 1                                                                     | Homo sapiens ADAMTS-like 1 (ADAMTSL1), transcript variant 2, mRNA [NM_052866]                                                     | 1.48564 | down | 2.84659  | down | 125.66589  | 193.31413  | 47.07663  | 118.16679  | Detected    | Detected    | Detected    | Detected     |
| 7418 | A_33_P3234277 | HLA-DPA1     | Hs.347270 | major histocompatibility complex, class II, DP alpha 1                            | Homo sapiens major histocompatibility complex, class II, DP alpha 1 (HLA-DPA1), mRNA [NM_033554]                                  | 1.48285 | down | 2.06918  | down | 308.33856  | 473.43170  | 186.24939 | 339.82776  | Detected    | Detected    | Detected    | Detected     |
| 7419 | A_33_P3248638 | C9orf47      | Hs.585118 | chromosome 9 open reading frame 47                                                | Homo sapiens chromosome 9 open reading frame 47 (C9orf47), transcript variant 1, mRNA [NM_001001938]                              | 1.48141 | down | 2.47897  | down | 5.36613    | 8.23133    | 8.33646   | 18.22293   | Compromised | Compromised | Compromised | Detected     |
| 7420 | A_23_P117363  | SERPINA6     | Hs.532635 | serpin peptidase inhibitor, clade A (alpha-1 antiprotease, antitrypsin), member 6 | Homo sapiens serpin peptidase inhibitor, clade A (alpha-1 antiprotease, antitrypsin), member 6 (SERPINA6), mRNA [NM_001756]       | 1.47927 | down | 2.15676  | down | 104.93702  | 160.73442  | 56.12220  | 106.73357  | Detected    | Detected    | Detected    | Detected     |
| 7421 | A_23_P89665   | KRT33B       | Hs.32950  | keratin 33B                                                                       | Homo sapiens keratin 33B (KRT33B), mRNA [NM_002279]                                                                               | 1.47569 | down | 2.68839  | down | 29.46528   | 45.02346   | 19.65440  | 46.59269   | Detected    | Detected    | Detected    | Detected     |
| 7422 | A_33_P3303772 | SLC6A3       | Hs.406    | solute carrier family 6 (neurotransmitter transporter, dopamine), member 3        | Homo sapiens solute carrier family 6 (neurotransmitter transporter, dopamine), member 3 (SLC6A3), mRNA [NM_001044]                | 1.47399 | down | 3.54998  | down | 203.10928  | 309.99643  | 164.00641 | 513.39600  | Detected    | Detected    | Detected    | Detected     |
| 7423 | A_23_P110276  | LOC84740     | Hs.663029 | hypothetical LOC84740                                                             | Homo sapiens hypothetical LOC84740 (LOC84740), non-coding RNA [NR_026892]                                                         | 1.47305 | down | 6.18007  | down | 2.92835    | 4.46657    | 3.12752   | 17.04352   | Compromised | Compromised | Compromised | Not Detected |
| 7424 | A_33_P3418234 | BECN1L1      |           | Beclin-1-like protein 1                                                           | PREDICTED: Homo sapiens Beclin-1-like protein 1 (BECN1L1), mRNA [XM_001727013]                                                    | 1.47152 | down | 7.75559  | down | 8.42086    | 12.83084   | 4.18006   | 28.58665   | Compromised | Compromised | Compromised | Detected     |
| 7425 | A_33_P3336287 | SEC61A2      | Hs.112955 | Sec61 alpha 2 subunit (S. cerevisiae)                                             | Homo sapiens Sec61 alpha 2 subunit (S. cerevisiae) (SEC61A2), transcript variant 3, mRNA [NM_001142627]                           | 1.46962 | down | 2.14041  | down | 13.76807   | 20.95137   | 10.87307  | 20.52175   | Detected    | Detected    | Compromised | Detected     |
| 7426 | A_24_P57993   | KIAA1644     | Hs.6829   | KIAA1644                                                                          | Homo sapiens KIAA1644 (KIAA1644), mRNA [NM_001099294]                                                                             | 1.46766 | down | 5.00235  | down | 9.17883    | 13.94907   | 5.49268   | 24.22832   | Compromised | Compromised | Compromised | Detected     |
| 7427 | A_23_P374689  | GAD1         | Hs.420036 | glutamate decarboxylase 1 (brain, 67kDa)                                          | Homo sapiens glutamate decarboxylase 1 (brain, 67kDa) (GAD1), transcript variant GAD67, mRNA [NM_000817]                          | 1.46556 | down | 2.38326  | down | 12.30295   | 18.67002   | 4.31243   | 9.06273    | Compromised | Detected    | Compromised | Compromised  |
| 7428 | A_33_P3423740 | TMEM164      | Hs.659535 | transmembrane protein 164                                                         | Homo sapiens transmembrane protein 164 (TMEM164), transcript variant 2, mRNA [NM_032227]                                          | 1.45968 | down | 2.34921  | down | 21.68126   | 32.74746   | 21.03514  | 43.57451   | Detected    | Detected    | Detected    | Detected     |
| 7429 | A_33_P3235546 | RIMS3        | Hs.654808 | regulating synaptic membrane exocytosis 3                                         | Homo sapiens regulating synaptic membrane exocytosis 3 (RIMS3), mRNA [NM_014747]                                                  | 1.45705 | down | 2.91023  | down | 29.49255   | 44.49592   | 8.71382   | 22.36152   | Detected    | Detected    | Compromised | Detected     |
| 7430 | A_33_P3587376 | SNAR-A3      | Hs.723094 | small ILF3/NF90-associated RNA A3                                                 | Homo sapiens small ILF3/NF90-associated RNA A3 (SNAR-A3), small nuclear RNA [NR_024214]                                           | 1.45661 | down | 4.24025  | down | 4078.65140 | 6151.65770 | 589.24646 | 2203.20170 | Detected    | Detected    | Detected    | Detected     |
| 7431 | A_33_P3370364 | PRLHR        | Hs.248119 | prolactin releasing hormone receptor                                              | Homo sapiens prolactin releasing hormone receptor (PRLHR), mRNA [NM_004248]                                                       | 1.45308 | down | 2.14957  | down | 790.26830  | 1189.04260 | 383.03394 | 726.03094  | Detected    | Detected    | Detected    | Detected     |
| 7432 | A_23_P204087  | OAS2         | Hs.414332 | 2'-5'-oligoadenylate synthetase 2, 69/71kDa                                       | Homo sapiens 2'-5'-oligoadenylate synthetase 2, 69/71kDa (OAS2), transcript variant 1, mRNA [NM_016817]                           | 1.44061 | down | 4.10454  | down | 15.18999   | 22.65881   | 4.27888   | 15.48676   | Detected    | Detected    | Compromised | Detected     |
| 7433 | A_33_P3235048 | TRIM77       | Hs.723112 | tripartite motif-containing 77                                                    | Homo sapiens tripartite motif-containing 77 (TRIM77), mRNA [NM_001146162]                                                         | 1.44015 | down | 3.82600  | down | 10.15282   | 15.14003   | 2.34709   | 7.91845    | Compromised | Detected    | Compromised | Compromised  |
| 7434 | A_33_P3262351 | C5orf49      | Hs.709979 | chromosome 5 open reading frame 49                                                | Homo sapiens chromosome 5 open reading frame 49 (C5orf49), mRNA [NM_001089584]                                                    | 1.43888 | down | 2.02829  | down | 13.02654   | 19.40825   | 6.33297   | 11.32668   | Detected    | Detected    | Compromised | Compromised  |
| 7435 | A_23_P389500  | REG1B        | Hs.4158   | regenerating islet-derived 1 beta                                                 | Homo sapiens regenerating islet-derived 1 beta (REG1B), mRNA [NM_006507]                                                          | 1.43709 | down | 8.41171  | down | 11.15775   | 16.60331   | 11.47424  | 85.10868   | Compromised | Detected    | Compromised | Detected     |
| 7436 | A_24_P362595  | PAX3         | Hs.42146  | paired box 3                                                                      | Homo sapiens paired box 3 (PAX3), transcript variant PAX3B, mRNA [NM_013942]                                                      | 1.43496 | down | 2.18871  | down | 77.99905   | 115.89452  | 59.26281  | 114.37628  | Detected    | Detected    | Detected    | Detected     |
| 7437 | A_33_P3272412 | FLJ45482     | Hs.644332 | hypothetical LOC645566                                                            | Homo sapiens cDNA FLJ45482 fis, clone BRTHA2001953, [AK127393]                                                                    | 1.43389 | down | 2.54731  | down | 11.33040   | 16.82260   | 3.16851   | 7.11709    | Compromised | Detected    | Compromised | Compromised  |
| 7438 | A_23_P135486  | AHSP         | Hs.274309 | alpha hemoglobin stabilizing protein                                              | Homo sapiens alpha hemoglobin stabilizing protein (AHSP), mRNA [NM_016633]                                                        | 1.43118 | down | 2.11141  | down | 11.55547   | 17.12441   | 6.96261   | 12.96316   | Compromised | Detected    | Compromised | Compromised  |
| 7439 | A_33_P3325102 | LOC644173    | Hs.646314 | hypothetical LOC644173                                                            | PREDICTED: Homo sapiens hypothetical LOC644173 (LOC644173), miscRNA [XR_039993]                                                   | 1.43116 | down | 2.16785  | down | 49.38723   | 73.18757   | 31.55958  | 60.32909   | Detected    | Detected    | Detected    | Detected     |
| 7440 | A_33_P3355185 | BCL2         | Hs.150749 | B-cell CLL/lymphoma 2                                                             | Homo sapiens B-cell CLL/lymphoma 2 (BCL2), nuclear gene encoding mitochondrial protein, transcript variant beta, mRNA [NM_000657] | 1.42241 | down | 2.68928  | down | 87.22260   | 128.46571  | 19.87366  | 47.12802   | Detected    | Detected    | Detected    | Detected     |
| 7441 | A_23_P369815  | FASLG        | Hs.2007   | Fas ligand (TNF superfamily, member 6)                                            | Homo sapiens Fas ligand (TNF superfamily, member 6) (FASLG), mRNA [NM_000639]                                                     | 1.41993 | down | 2.89396  | down | 12.81226   | 18.83764   | 6.46779   | 16.50493   | Detected    | Detected    | Compromised | Detected     |
| 7442 | A_23_P1186    | C1QL3        | Hs.676792 | complement component 1, q subcomponent-like 3                                     | Homo sapiens complement component 1, q subcomponent-like 3 (C1QL3), mRNA [NM_001010908]                                           | 1.41954 | down | 10.39061 | down | 2.53652    | 3.72837    | 2.99657   | 27.45563   | Compromised | Compromised | Compromised | Not Detected |
| 7443 | A_33_P3323929 | LOC642622    | Hs.576560 | similar to hCG1798126                                                             | PREDICTED: Homo sapiens similar to hCG1798126 (LOC642622), mRNA [XM_001713966]                                                    | 1.41408 | down | 11.34369 | down | 5.38203    | 7.88049    | 3.16624   | 31.67116   | Compromised | Compromised | Compromised | Detected     |
| 7444 | A_23_P306352  | RGAG1        | Hs.201071 | retrotransposon gag domain containing 1                                           | Homo sapiens retrotransposon gag domain containing 1 (RGAG1), mRNA [NM_020769]                                                    | 1.41260 | down | 4.51255  | down | 33.82271   | 49.47207   | 3.03998   | 12.09647   | Detected    | Detected    | Compromised | Compromised  |

|      |               |              |           |                                                                                                           |                                                                                                                                                                                                                                                    |         |      |          |      |           |           |          |           |             |             |             |              |
|------|---------------|--------------|-----------|-----------------------------------------------------------------------------------------------------------|----------------------------------------------------------------------------------------------------------------------------------------------------------------------------------------------------------------------------------------------------|---------|------|----------|------|-----------|-----------|----------|-----------|-------------|-------------|-------------|--------------|
| 7445 | A_33_P3215605 | LOC100131746 | Hs.693955 | hypothetical LOC100131746                                                                                 | PREDICTED: Homo sapiens hypothetical LOC100131746 (LOC100131746), mRNA [XM_001721255]                                                                                                                                                              | 1.40990 | down | 2.04038  | down | 9.95920   | 14.53936  | 8.29647  | 14.92691  | Compromised | Compromised | Compromised | Detected     |
| 7446 | A_33_P3295917 |              |           |                                                                                                           | Interleukin-7 Precursor (IL-7) [Source:UniProtKB/Swiss-Prot;Acc:P13232] [ENST00000379113]                                                                                                                                                          | 1.40498 | down | 3.75773  | down | 2.96457   | 4.31287   | 4.81193  | 15.94448  | Compromised | Compromised | Compromised | Detected     |
| 7447 | A_33_P3353979 | SYT15        | Hs.696346 | synaptotagmin XV                                                                                          | Homo sapiens synaptotagmin XV (SYT15), transcript variant b, mRNA [NM_181519]                                                                                                                                                                      | 1.40152 | down | 2.40805  | down | 94.94573  | 137.78691 | 29.68865 | 63.04065  | Detected    | Detected    | Detected    | Detected     |
| 7448 | A_23_P115932  | KCNK18       | Hs.449650 | potassium channel, subfamily K, member 18                                                                 | Homo sapiens potassium channel, subfamily K, member 18 (KCNK18), mRNA [NM_181840]                                                                                                                                                                  | 1.39215 | down | 5.57100  | down | 2.51963   | 3.63207   | 2.83199  | 13.91203  | Compromised | Compromised | Compromised | Not Detected |
| 7449 | A_23_P305033  | MAP3K7IP3    | Hs.188256 | mitogen-activated protein kinase kinase kinase 7 interacting protein 3                                    | Homo sapiens mitogen-activated protein kinase kinase kinase 7 interacting protein 3 (MAP3K7IP3), mRNA [NM_152787]                                                                                                                                  | 1.38138 | down | 2.18856  | down | 64.03622  | 91.59507  | 36.42929 | 70.30319  | Detected    | Detected    | Detected    | Detected     |
| 7450 | A_24_P225518  | GLTPD1       | Hs.515689 | glycolipid transfer protein domain containing 1                                                           | Homo sapiens glycolipid transfer protein domain containing 1 (GLTPD1), mRNA [NM_001029885]                                                                                                                                                         | 1.38122 | down | 2.12549  | down | 101.16393 | 144.68448 | 49.51133 | 92.79606  | Detected    | Detected    | Detected    | Detected     |
| 7451 | A_33_P3307049 | LOC100129363 | Hs.679166 | hypothetical protein LOC100129363                                                                         | Homo sapiens cDNA FLJ46623 fis, clone TLUNG2001810, [AK128478]                                                                                                                                                                                     | 1.37687 | down | 2.82062  | down | 16.94780  | 24.16229  | 3.26193  | 8.11306   | Detected    | Detected    | Compromised | Compromised  |
| 7452 | A_23_P501010  | COL17A1      | Hs.117938 | collagen, type XVII, alpha 1                                                                              | Homo sapiens collagen, type XVII, alpha 1 (COL17A1), mRNA [NM_000494]                                                                                                                                                                              | 1.36335 | down | 4.06449  | down | 13.42431  | 18.95098  | 6.02284  | 21.58603  | Compromised | Detected    | Compromised | Detected     |
| 7453 | A_33_P3261862 | OR2A1        | Hs.528398 | olfactory receptor, family 2, subfamily A, member 1                                                       | Homo sapiens olfactory receptor, family 2, subfamily A, member 1 (OR2A1), mRNA [NM_001005287]                                                                                                                                                      | 1.36128 | down | 2.62266  | down | 35.37433  | 49.86203  | 8.73447  | 20.19963  | Detected    | Detected    | Compromised | Detected     |
| 7454 | A_33_P3339138 | RPRML        | Hs.367999 | reprimin-like                                                                                             | Homo sapiens reprimin-like (RPRML), mRNA [NM_203400]                                                                                                                                                                                               | 1.36060 | down | 2.36285  | down | 27.14795  | 38.24723  | 4.82195  | 10.04672  | Detected    | Detected    | Compromised | Compromised  |
| 7455 | A_23_P321846  | KCNK5        | Hs.117780 | potassium voltage-gated channel, delayed-rectifier, subfamily S, member 1                                 | Homo sapiens potassium voltage-gated channel, delayed-rectifier, subfamily S, member 1 (KCNK5), mRNA [NM_002251]                                                                                                                                   | 1.35809 | down | 2.47669  | down | 20.73068  | 29.15243  | 12.10510 | 26.43660  | Detected    | Detected    | Compromised | Detected     |
| 7456 | A_33_P3323136 | ENKUR        | Hs.534486 | enkurin, TRPC channel interacting protein                                                                 | Homo sapiens enkurin, TRPC channel interacting protein (ENKUR), mRNA [NM_145010]                                                                                                                                                                   | 1.35751 | down | 2.04080  | down | 16.80784  | 23.62596  | 12.43615 | 22.37961  | Detected    | Detected    | Compromised | Detected     |
| 7457 | A_24_P410463  | TRPM6        | Hs.272225 | transient receptor potential cation channel, subfamily M, member 6                                        | Homo sapiens transient receptor potential cation channel, subfamily M, member 6 (TRPM6), mRNA [NM_017682]                                                                                                                                          | 1.35685 | down | 2.57445  | down | 13.58451  | 19.08569  | 6.46530  | 14.67703  | Compromised | Detected    | Compromised | Compromised  |
| 7458 | A_33_P3384548 |              | Hs.664071 |                                                                                                           | Homo sapiens cDNA, FLJ99546 [AK308955]                                                                                                                                                                                                             | 1.35556 | down | 2.00876  | down | 28.76306  | 40.37260  | 18.21739 | 32.26859  | Detected    | Detected    | Detected    | Detected     |
| 7459 | A_33_P3291882 |              |           |                                                                                                           | AT-rich interactive domain-containing protein 1B (ARID domain-containing protein 1B)(Osa homolog 2)(hOsa2)(p250R)(BRG1-binding protein hE1D/Osa1)(BRG1-associated factor 250b)(BAF250B) [Source:UniProtKB/Swiss-Prot;Acc:Q8NFD5] [ENST00000354354] | 1.35109 | down | 2.12328  | down | 50.66385  | 70.87891  | 30.22607 | 56.59192  | Detected    | Detected    | Detected    | Detected     |
| 7460 | A_33_P3305023 | WWOX         | Hs.461453 | WW domain containing oxidoreductase                                                                       | Homo sapiens WW domain containing oxidoreductase (WWOX), transcript variant 3, mRNA [NM_130844]                                                                                                                                                    | 1.34773 | down | 2.09145  | down | 143.47217 | 200.21758 | 92.02263 | 169.71037 | Detected    | Detected    | Detected    | Detected     |
| 7461 | A_33_P3257993 | RNF125       | Hs.633703 | ring finger protein 125                                                                                   | Homo sapiens ring finger protein 125 (RNF125), mRNA [NM_017831]                                                                                                                                                                                    | 1.34745 | down | 2.74886  | down | 19.01033  | 26.52371  | 5.92678  | 14.36603  | Detected    | Detected    | Compromised | Detected     |
| 7462 | A_33_P3328352 | DEFB115      | Hs.580793 | defensin, beta 115                                                                                        | Homo sapiens defensin, beta 115 (DEFB115), mRNA [NM_001037730]                                                                                                                                                                                     | 1.33461 | down | 7.52160  | down | 2.64916   | 3.66097   | 2.93480  | 19.46496  | Compromised | Compromised | Compromised | Detected     |
| 7463 | A_23_P377212  | MYEOV2       | Hs.293884 | myeloma overexpressed 2                                                                                   | Homo sapiens myeloma overexpressed 2 (MYEOV2), transcript variant 1, mRNA [NM_138336]                                                                                                                                                              | 1.33181 | down | 10.23352 | down | 2.76953   | 3.81928   | 3.04889  | 27.51262  | Compromised | Compromised | Compromised | Detected     |
| 7464 | A_23_P411772  | PCDHGB2      | Hs.368160 | protocadherin gamma subfamily B, 2                                                                        | Homo sapiens protocadherin gamma subfamily B, 2 (PCDHGB2), transcript variant 2, mRNA [NM_032096]                                                                                                                                                  | 1.33020 | down | 2.08557  | down | 19.65937  | 27.07822  | 12.73155 | 23.41382  | Detected    | Detected    | Detected    | Detected     |
| 7465 | A_33_P3384988 | SLC30A5      | Hs.631975 | solute carrier family 30 (zinc transporter), member 5                                                     | Homo sapiens solute carrier family 30 (zinc transporter), member 5 (SLC30A5), transcript variant 2, mRNA [NM_024055]                                                                                                                               | 1.32964 | down | 2.51107  | down | 44.18130  | 60.82819  | 6.21703  | 13.76596  | Detected    | Detected    | Compromised | Compromised  |
| 7466 | A_23_P7560    | IL12B        | Hs.674    | interleukin 12B (natural killer cell stimulatory factor 2, cytotoxic lymphocyte maturation factor 2, p40) | Homo sapiens interleukin 12B (natural killer cell stimulatory factor 2, cytotoxic lymphocyte maturation factor 2, p40) (IL12B), mRNA [NM_002187]                                                                                                   | 1.32869 | down | 6.35780  | down | 2.78805   | 3.83580   | 3.04526  | 17.07249  | Compromised | Compromised | Compromised | Detected     |
| 7467 | A_23_P51002   | SULT1C2      | Hs.436123 | sulfotransferase family, cytosolic, 1C, member 2                                                          | Homo sapiens sulfotransferase family, cytosolic, 1C, member 2 (SULT1C2), transcript variant 2, mRNA [NM_176825]                                                                                                                                    | 1.32838 | down | 2.51139  | down | 2.79229   | 3.84075   | 8.48019  | 18.77955  | Compromised | Compromised | Compromised | Detected     |
| 7468 | A_24_P150791  | JPH3         | Hs.719916 | junctionophilin 3                                                                                         | Homo sapiens junctionophilin 3 (JPH3), mRNA [NM_020655]                                                                                                                                                                                            | 1.32648 | down | 2.72058  | down | 25.52138  | 35.05401  | 12.61701 | 30.26796  | Detected    | Detected    | Compromised | Detected     |
| 7469 | A_23_P117261  | RXFP2        | Hs.680763 | relaxin/insulin-like family peptide receptor 2                                                            | Homo sapiens relaxin/insulin-like family peptide receptor 2 (RXFP2), transcript variant 1, mRNA [NM_130806]                                                                                                                                        | 1.32606 | down | 11.67260 | down | 2.99940   | 4.11840   | 2.95612  | 30.42671  | Compromised | Compromised | Compromised | Not Detected |
| 7470 | A_33_P3352677 |              | Hs.637444 |                                                                                                           | Novel protein [Source:UniProtKB/TrEMBL;Acc:B1AH E6] [ENST00000406912]                                                                                                                                                                              | 1.32113 | down | 2.00908  | down | 45.90829  | 62.80170  | 21.74473 | 38.52272  | Detected    | Detected    | Detected    | Detected     |
| 7471 | A_33_P3214334 | LY6G6F       | Hs.591794 | lymphocyte antigen 6 complex, locus G6F                                                                   | Homo sapiens lymphocyte antigen 6 complex, locus G6F (LY6G6F), mRNA [NM_001003693]                                                                                                                                                                 | 1.32057 | down | 7.53189  | down | 2.66970   | 3.65053   | 2.91943  | 19.38957  | Compromised | Compromised | Compromised | Detected     |
| 7472 | A_23_P140450  | SLC27A2      | Hs.720807 | solute carrier family 27 (fatty acid transporter), member 2                                               | Homo sapiens solute carrier family 27 (fatty acid transporter), member 2 (SLC27A2), transcript variant 1, mRNA [NM_003645]                                                                                                                         | 1.31795 | down | 7.22157  | down | 2.55273   | 3.48366   | 2.77262  | 17.65582  | Compromised | Compromised | Compromised | Detected     |

|      |                |              |           |                                                                                  |                                                                                                                            |         |      |          |      |             |             |            |            |             |             |             |              |
|------|----------------|--------------|-----------|----------------------------------------------------------------------------------|----------------------------------------------------------------------------------------------------------------------------|---------|------|----------|------|-------------|-------------|------------|------------|-------------|-------------|-------------|--------------|
| 7473 | A_33_P3216200  |              |           |                                                                                  |                                                                                                                            | 1.31726 | down | 3.15976  | down | 19.42271    | 26.49202    | 3.95044    | 11.00690   | Detected    | Detected    | Compromised | Compromised  |
| 7474 | A_33_P3492042  | D21S2091E    | Hs.551028 | D21S2091E                                                                        | Homo sapiens D21S2091E mRNA sequence [AY063455]                                                                            | 1.31660 | down | 2.03188  | down | 2.44662     | 3.33544     | 8.69196    | 15.57333   | Compromised | Compromised | Compromised | Detected     |
| 7475 | A_33_P3400552  | DEFB108B     | Hs.555032 | defensin, beta 108B                                                              | Homo sapiens defensin, beta 108B (DEFB108B), mRNA [NM_001002035]                                                           | 1.31657 | down | 2.63868  | down | 2.82801     | 3.85531     | 6.92404    | 16.11061   | Compromised | Compromised | Compromised | Detected     |
| 7476 | A_23_P411162   | PER2         | Hs.58756  | period homolog 2 (Drosophila)                                                    | Homo sapiens period homolog 2 (Drosophila) (PER2), mRNA [NM_022817]                                                        | 1.31594 | down | 2.27928  | down | 30.52989    | 41.60015    | 15.66415   | 31.48260   | Detected    | Detected    | Detected    | Detected     |
| 7477 | A_24_P227415   | CLECTA       | Hs.143929 | C-type lectin domain family 7, member A                                          | Homo sapiens C-type lectin domain family 7, member A (CLECTA), transcript variant 6, mRNA [NM_197954]                      | 1.31580 | down | 5.04312  | down | 2.55052     | 3.47496     | 3.73789    | 16.62228   | Compromised | Compromised | Compromised | Detected     |
| 7478 | A_23_P66481    | RTN4RL1      | Hs.22917  | reticulon 4 receptor-like 1                                                      | Homo sapiens reticulon 4 receptor-like 1 (RTN4RL1), mRNA [NM_176566]                                                       | 1.31414 | down | 3.21157  | down | 16.62499    | 22.62219    | 10.15553   | 28.75973   | Detected    | Detected    | Compromised | Detected     |
| 7479 | A_32_P48559    | C16orf92     | Hs.651588 | chromosome 16 open reading frame 92                                              | Homo sapiens chromosome 16 open reading frame 92 (C16orf92), transcript variant 2, mRNA [NM_001109680]                     | 1.31205 | down | 2.11198  | down | 17.07506    | 23.19780    | 8.87119    | 16.52107   | Detected    | Detected    | Compromised | Compromised  |
| 7480 | A_33_P3302681  |              |           |                                                                                  | Transducin-like enhancer protein 4 [Source:UniProtKB/Swiss-Prot;Acc:Q04727] [ENST00000399288]                              | 1.31159 | down | 7.14448  | down | 13.11559    | 17.81231    | 2.57921    | 16.24888   | Detected    | Detected    | Compromised | Detected     |
| 7481 | A_33_P3708763  | LOC283501    | Hs.666761 | hypothetical protein LOC283501                                                   | Homo sapiens cDNA FLJ35973 fis, clone TES1201288 (AK030322)                                                                | 1.31026 | down | 7.58940  | down | 2.43321     | 3.30119     | 2.73506    | 18.30377   | Compromised | Compromised | Compromised | Detected     |
| 7482 | A_24_P649282   | LUZP2        | Hs.144138 | leucine zipper protein 2                                                         | Homo sapiens leucine zipper protein 2 (LUZP2), mRNA [NM_001009598]                                                         | 1.30576 | down | 6.31711  | down | 2.39659     | 3.24033     | 2.64730    | 14.74644   | Compromised | Compromised | Compromised | Detected     |
| 7483 | A_33_P3293925  | CXorf36      | Hs.98321  | chromosome X open reading frame 36                                               | Homo sapiens chromosome X open reading frame 36 (CXorf36), transcript variant 1, mRNA [NM_176819]                          | 1.30393 | down | 12.07477 | down | 30.57337    | 41.27925    | 16.45732   | 175.22803  | Detected    | Detected    | Detected    | Not Detected |
| 7484 | A_23_P108699   | FSHR         | Hs.1428   | follicle stimulating hormone receptor                                            | Homo sapiens follicle stimulating hormone receptor (FSHR), transcript variant 1, mRNA [NM_000145]                          | 1.30083 | down | 2.59707  | down | 17.53664    | 23.62109    | 6.83166    | 15.64501   | Detected    | Detected    | Compromised | Detected     |
| 7485 | A_23_P107963   | FUT1         | Hs.69747  | fucosyltransferase 1 (galactoside 2-alpha-L-fucosyltransferase, H blood group)   | Homo sapiens fucosyltransferase 1 (galactoside 2-alpha-L-fucosyltransferase, H blood group) (FUT1), mRNA [NM_000148]       | 1.29975 | down | 2.87207  | down | 5.72921     | 7.71060     | 7.45843    | 18.88900   | Compromised | Compromised | Compromised | Detected     |
| 7486 | A_33_P3390387  | NCRNA00159   |           | non-protein coding RNA 159                                                       | Homo sapiens non-protein coding RNA 159 (NCRNA00159), non-coding RNA [NR_024352]                                           | 1.29788 | down | 6.03831  | down | 2.39077     | 3.21296     | 2.61593    | 13.92859   | Compromised | Compromised | Compromised | Detected     |
| 7487 | A_23_P25720    | SERPINA4     | Hs.719893 | serpin peptidase inhibitor, clade A (alpha-1 antitrypsin, antitrypsin), member 4 | Homo sapiens serpin peptidase inhibitor, clade A (alpha-1 antitrypsin, antitrypsin), member 4 (SERPINA4), mRNA [NM_006215] | 1.29610 | down | 2.31465  | down | 2.43472     | 3.26754     | 8.30253    | 16.94575   | Compromised | Compromised | Compromised | Detected     |
| 7488 | A_32_P115438   | LOC100128239 | Hs.423734 | hypothetical LOC100128239                                                        | Homo sapiens hypothetical LOC100128239 (LOC100128239), non-coding RNA [NR_027276]                                          | 1.29501 | down | 2.48481  | down | 16.20004    | 21.72311    | 15.43094   | 33.81046   | Detected    | Detected    | Detected    | Detected     |
| 7489 | A_24_P11061    | CSAG1        | Hs.423718 | chondrosarcoma associated gene 1                                                 | Homo sapiens chondrosarcoma associated gene 1 (CSAG1), transcript variant a, mRNA [NM_153478]                              | 1.29485 | down | 2.22854  | down | 21.46707    | 28.78238    | 6.44007    | 12.65544   | Detected    | Detected    | Compromised | Compromised  |
| 7490 | A_32_P23795    | LOC646890    | Hs.718696 | hypothetical LOC646890                                                           | PREDICTED: Homo sapiens hypothetical LOC646890, miscRNA [XR_015691]                                                        | 1.29450 | down | 2.69418  | down | 11424.36900 | 15313.20600 | 3743.21900 | 8892.76800 | Detected    | Detected    | Detected    | Detected     |
| 7491 | A_33_P32225353 |              | Hs.722851 |                                                                                  | Uncharacterized protein ENSP00000382042 [Source:UniProtKB/Swiss-Prot;Acc:A8WV6] [ENST00000428928]                          | 1.29419 | down | 2.62976  | down | 13.30450    | 17.82905    | 7.13818    | 16.55272   | Detected    | Detected    | Compromised | Detected     |
| 7492 | A_24_P652502   |              | Hs.454579 |                                                                                  | Putative uncharacterized protein ENSP00000374933 [Source:UniProtKB/TrEMBL;Acc:A6NJ66] [ENST00000390426]                    | 1.29380 | down | 5.88439  | down | 2.38410     | 3.19392     | 2.55437    | 13.25412   | Compromised | Compromised | Compromised | Detected     |
| 7493 | A_33_P3283206  |              |           |                                                                                  |                                                                                                                            | 1.29243 | down | 2.02249  | down | 14.24555    | 19.06428    | 10.46900   | 18.67058   | Detected    | Compromised | Compromised | Detected     |
| 7494 | A_24_P229638   | C9orf117     | Hs.652519 | chromosome 9 open reading frame 117                                              | Homo sapiens chromosome 9 open reading frame 117 (C9orf117), mRNA [NM_001012502]                                           | 1.29095 | down | 2.23251  | down | 2.38750     | 3.19144     | 6.93065    | 13.64372   | Compromised | Compromised | Compromised | Detected     |
| 7495 | A_23_P116850   | KRT2         | Hs.707    | keratin 2                                                                        | Homo sapiens keratin 2 (KRT2), mRNA [NM_000423]                                                                            | 1.28959 | down | 8.54775  | down | 2.40478     | 3.21113     | 2.69493    | 20.31255   | Compromised | Compromised | Compromised | Not Detected |
| 7496 | A_33_P3365312  | LOC642891    | Hs.570612 | hypothetical LOC642891                                                           | PREDICTED: Homo sapiens hypothetical LOC642891, mRNA [XM_931146]                                                           | 1.28692 | down | 2.76020  | down | 2.53151     | 3.37337     | 6.33449    | 15.41764   | Compromised | Compromised | Compromised | Detected     |
| 7497 | A_23_P117896   | TGM7         | Hs.164661 | transglutaminase 7                                                               | Homo sapiens transglutaminase 7 (TGM7), mRNA [NM_052955]                                                                   | 1.28319 | down | 2.13483  | down | 18.88352    | 25.09033    | 7.75293    | 14.59470   | Detected    | Detected    | Compromised | Detected     |
| 7498 | A_33_P3327106  | LOC100129900 | Hs.690476 | P008-1                                                                           | Homo sapiens P008-1 and putative P008-2 mRNA, complete cds. [AF109190]                                                     | 1.28226 | down | 7.57285  | down | 8.92666     | 11.85221    | 2.84984    | 19.03029   | Compromised | Compromised | Compromised | Detected     |
| 7499 | A_33_P3718274  | LOC285629    | Hs.554279 | hypothetical LOC285629                                                           | DB296219 BNGH42 Homo sapiens cDNA clone BNGH42003641 3', mRNA sequence [DB296219]                                          | 1.28196 | down | 6.59235  | down | 2.49736     | 3.31504     | 2.67103    | 15.52687   | Compromised | Compromised | Compromised | Detected     |
| 7500 | A_33_P3229107  | LOC642587    | Hs.510543 | NPC-A-5                                                                          | Homo sapiens NPC-A-5 (LOC642587), mRNA [NM_001104548]                                                                      | 1.28192 | down | 6.95425  | down | 2.42371     | 3.21717     | 2.56219    | 15.71187   | Compromised | Compromised | Compromised | Detected     |
| 7501 | A_33_P3217776  | PRB4         | Hs.528651 | proline-rich protein BstNI subfamily 4                                           | Homo sapiens proline-rich protein BstNI subfamily 4 (PRB4), mRNA [NM_002723]                                               | 1.28132 | down | 10.25867 | down | 2.49206     | 3.30636     | 4.62375    | 41.82637   | Compromised | Compromised | Compromised | Detected     |
| 7502 | A_33_P3335157  | LOC730242    |           | hypothetical LOC730242                                                           | PREDICTED: Homo sapiens hypothetical LOC730242, mRNA [XM_001126992]                                                        | 1.28093 | down | 10.79608 | down | 2.31285     | 3.06766     | 2.45680    | 23.38839   | Compromised | Compromised | Compromised | Detected     |
| 7503 | A_32_P174164   | LOC441601    | Hs.144683 | septin 7 pseudogene                                                              | Homo sapiens septin 7 pseudogene (LOC441601), non-coding RNA [NR_003034]                                                   | 1.27635 | down | 14.50679 | down | 2.29201     | 3.02913     | 2.41732    | 30.92224   | Compromised | Compromised | Compromised | Detected     |
| 7504 | A_33_P3372965  | LOC387723    | Hs.127394 | similar to hCG1648656                                                            | PREDICTED: Homo sapiens similar to hCG1648656 (LOC387723), miscRNA [XR_078431]                                             | 1.27518 | down | 11.45981 | down | 2.43764     | 3.21865     | 4.44892    | 44.95703   | Compromised | Compromised | Compromised | Detected     |

|      |               |              |           |                                                             |                                                                                                                |         |          |          |         |             |             |             |             |             |             |             |              |
|------|---------------|--------------|-----------|-------------------------------------------------------------|----------------------------------------------------------------------------------------------------------------|---------|----------|----------|---------|-------------|-------------|-------------|-------------|-------------|-------------|-------------|--------------|
| 7505 | A_33_P3223142 |              |           |                                                             | 1.27460                                                                                                        | down    | 11.08033 | down     | 2.38454 | 3.14712     | 3.68997     | 36.05293    | Compromised | Compromised | Compromised | Detected    |              |
| 7506 | A_33_P3310159 | DGKB         | Hs.567255 | diacylglycerol kinase, beta 90kDa                           | Homo sapiens diacylglycerol kinase, beta 90kDa (DGKB), transcript variant 1, mRNA [NM_004080]                  | 1.27450 | down     | 22.37058 | down    | 2.29541     | 3.02924     | 2.42966     | 47.92793    | Compromised | Compromised | Compromised | Detected     |
| 7507 | A_23_P366936  | KRT6C        | Hs.709234 | keratin 6C                                                  | Homo sapiens keratin 6C (KRT6C), mRNA [NM_173086]                                                              | 1.27324 | down     | 13.18395 | down    | 2.40463     | 3.17025     | 2.53402     | 29.45920    | Compromised | Compromised | Compromised | Detected     |
| 7508 | A_23_P49145   | ZG16         | Hs.632195 | zymogen granule protein 16 homolog (rat)                    | Homo sapiens zymogen granule protein 16 homolog (rat) (ZG16), mRNA [NM_152338]                                 | 1.27267 | down     | 2.45985  | down    | 2.35528     | 3.10377     | 14.63657    | 31.74781    | Compromised | Compromised | Detected    | Detected     |
| 7509 | A_23_P416774  | CLIC5        | Hs.485489 | chloride intracellular channel 5                            | Homo sapiens chloride intracellular channel 5 (CLIC5), transcript variant 2, mRNA [NM_016929]                  | 1.26850 | down     | 7.11108  | down    | 2.38700     | 3.13527     | 2.53125     | 15.87218    | Compromised | Compromised | Compromised | Detected     |
| 7510 | A_33_P3738799 | LOC340074    | Hs.434633 | hypothetical LOC340074                                      | Homo sapiens hypothetical LOC340074 (LOC340074), non-coding RNA [NR_027127]                                    | 1.26600 | down     | 8.58039  | down    | 2.32845     | 3.05235     | 5.59658     | 42.34436    | Compromised | Compromised | Compromised | Detected     |
| 7511 | A_33_P3409234 | LOC729426    | Hs.576570 | hypothetical LOC729426                                      | PREDICTED: Homo sapiens hypothetical LOC729426 (LOC729426), mRNA [XM_001133548]                                | 1.26555 | down     | 6.66759  | down    | 2.24546     | 2.94250     | 4.15614     | 24.43566    | Compromised | Compromised | Compromised | Detected     |
| 7512 | A_33_P3237005 | ZFATAS       |           | ZFAT antisense RNA (non-protein coding)                     | Homo sapiens ZFAT antisense RNA (non-protein coding) (ZFATAS), antisense RNA [NR_002438]                       | 1.26421 | down     | 2.52546  | down    | 22.64752    | 29.64640    | 3.04335     | 6.77730     | Detected    | Detected    | Compromised | Compromised  |
| 7513 | A_23_P428366  | HORMAD2      | Hs.120391 | HORMA domain containing 2                                   | Homo sapiens HORMA domain containing 2 (HORMAD2), mRNA [NM_152510]                                             | 1.26388 | down     | 5.11824  | down    | 16.69834    | 21.85303    | 6.84024     | 30.87149    | Detected    | Detected    | Compromised | Detected     |
| 7514 | A_33_P3795644 |              | Hs.548784 |                                                             | Putative uncharacterized C21orf104 protein Precursor [Source:UniProtKB/Swiss-Prot;Acc:Q9UJ94] [ENST0000442121] | 1.26126 | down     | 2.06575  | down    | 18.56348    | 24.24363    | 2.74249     | 4.99562     | Detected    | Detected    | Compromised | Compromised  |
| 7515 | A_33_P3253139 | LOC100287919 | Hs.720919 | similar to hCG2041551                                       | PREDICTED: Homo sapiens similar to hCG2041551 (LOC100287919), miscRNA [XR_078371]                              | 1.25783 | down     | 2.57067  | down    | 15.82450    | 20.61025    | 2.57454     | 5.83597     | Detected    | Detected    | Compromised | Compromised  |
| 7516 | A_33_P3404032 | HIST3H2A     | Hs.26331  | histone cluster 3, H2a                                      | Homo sapiens histone cluster 3, H2a (HIST3H2A), mRNA [NM_033445]                                               | 1.25722 | down     | 2.24429  | down    | 47.73618    | 62.14280    | 20.87698    | 41.31546    | Detected    | Detected    | Detected    | Detected     |
| 7517 | A_23_P202034  | GUCY2G       | Hs.641462 | guanylate cyclase 2G homolog (mouse) pseudogene             | Homo sapiens guanylate cyclase 2G homolog (mouse) pseudogene (GUCY2G), non-coding RNA [NR_028134]              | 1.25559 | down     | 3.02350  | down    | 20.51348    | 26.69895    | 2.82840     | 7.54078     | Detected    | Detected    | Compromised | Compromised  |
| 7518 | A_33_P3300092 | NDST1        | Hs.222055 | N-deacetylase/N-sulfotransferase (heparan glucosaminyl) 1   | Homo sapiens N-deacetylase/N-sulfotransferase (heparan glucosaminyl) 1 (NDST1), mRNA [NM_001543]               | 1.25246 | down     | 2.10607  | down    | 11444.12000 | 14841.51100 | 12358.35300 | 22950.90200 | Detected    | Detected    | Detected    | Detected     |
| 7519 | A_23_P302568  | SLC30A3      | Hs.467981 | solute carrier family 30 (zinc transporter), member 3       | Homo sapiens solute carrier family 30 (zinc transporter), member 3 (SLC30A3), mRNA [NM_003459]                 | 1.24814 | down     | 2.95874  | down    | 102.44953   | 132.40523   | 24.76457    | 64.61054    | Detected    | Detected    | Detected    | Detected     |
| 7520 | A_32_P185481  | LOC100131165 | Hs.588006 | hypothetical protein LOC100131165                           | PREDICTED: Homo sapiens hypothetical protein LOC100131165 (LOC100131165), mRNA [XM_001719174]                  | 1.23926 | down     | 2.79974  | down    | 20.59343    | 26.42565    | 6.02989     | 14.88652    | Detected    | Detected    | Compromised | Compromised  |
| 7521 | A_33_P3218450 | CDC6         | Hs.405958 | cell division cycle 6 homolog (S. cerevisiae)               | Homo sapiens cell division cycle 6 homolog (S. cerevisiae) (CDC6), mRNA [NM_001254]                            | 1.23717 | down     | 2.79714  | down    | 49.27121    | 63.11818    | 9.24394     | 22.80010    | Detected    | Detected    | Compromised | Detected     |
| 7522 | A_33_P3262124 | MMP25        | Hs.654979 | matrix metalloproteinase 25                                 | Homo sapiens matrix metalloproteinase 25 (MMP25), mRNA [NM_022468]                                             | 1.23666 | down     | 2.02074  | down    | 49.90495    | 63.90376    | 15.99097    | 28.49379    | Detected    | Detected    | Detected    | Detected     |
| 7523 | A_33_P3410659 | CLEC12B      | Hs.127937 | C-type lectin domain family 12, member B                    | Homo sapiens C-type lectin domain family 12, member B (CLEC12B), transcript variant 1, mRNA [NM_001129998]     | 1.23650 | down     | 2.27560  | down    | 17.86912    | 22.87861    | 10.76614    | 21.60335    | Detected    | Detected    | Compromised | Detected     |
| 7524 | A_23_P400310  | REG4         | Hs.660883 | regenerating islet-derived family, member 4                 | Homo sapiens regenerating islet-derived family, member 4 (REG4), transcript variant 2, mRNA [NM_032044]        | 1.23341 | down     | 2.51761  | down    | 26.51492    | 33.86332    | 2.49580     | 5.54069     | Detected    | Detected    | Compromised | Compromised  |
| 7525 | A_24_P145009  | LOC441208    | Hs.510645 | zinc and ring finger 2 pseudogene                           | Homo sapiens zinc and ring finger 2 pseudogene (LOC441208), non-coding RNA [NR_003502]                         | 1.23335 | down     | 8.07829  | down    | 8.30882     | 10.61102    | 5.69094     | 40.53865    | Compromised | Compromised | Compromised | Detected     |
| 7526 | A_23_P411235  | C17orf77     | Hs.350775 | chromosome 17 open reading frame 77                         | Homo sapiens chromosome 17 open reading frame 77 (C17orf77), mRNA [NM_152480]                                  | 1.22752 | down     | 4.27762  | down    | 9.56497     | 12.15751    | 4.20483     | 15.86045    | Compromised | Compromised | Compromised | Detected     |
| 7527 | A_23_P104972  | MS4A5        | Hs.178066 | membrane-spanning 4-domains, subfamily A, member 5          | Homo sapiens membrane-spanning 4-domains, subfamily A, member 5 (MS4A5), mRNA [NM_023945]                      | 1.22357 | down     | 6.25832  | down    | 16.78607    | 21.26718    | 4.91905     | 27.14591    | Detected    | Detected    | Compromised | Not Detected |
| 7528 | A_23_P68234   | GPR75        | Hs.720428 | G protein-coupled receptor 75                               | Homo sapiens G protein-coupled receptor 75 (GPR75), mRNA [NM_006794]                                           | 1.21542 | down     | 8.17672  | down    | 17.98469    | 22.63414    | 8.30983     | 63.87205    | Detected    | Detected    | Compromised | Detected     |
| 7529 | A_23_P4850    | ZNF625       | Hs.512823 | zinc finger protein 625                                     | Homo sapiens zinc finger protein 625 (ZNF625), mRNA [NM_145233]                                                | 1.21263 | down     | 2.04909  | down    | 117.76243   | 147.86551   | 13.17973    | 23.81399    | Detected    | Detected    | Detected    | Detected     |
| 7530 | A_33_P3353073 | DEF6         | Hs.15476  | differentially expressed in FDOP 6 homolog (mouse)          | Homo sapiens differentially expressed in FDOP 6 homolog (mouse) (DEF6), mRNA [NM_022047]                       | 1.21092 | down     | 2.57043  | down    | 14.00718    | 17.56298    | 7.49195     | 16.98114    | Detected    | Detected    | Compromised | Detected     |
| 7531 | A_33_P3366758 | ST8SIA6      | Hs.677766 | ST8 alpha-N-acetylneuraminide alpha-2,8-sialyltransferase 6 | Homo sapiens ST8 alpha-N-acetylneuraminide alpha-2,8-sialyltransferase 6 (ST8SIA6), mRNA [NM_001004470]        | 1.20943 | down     | 3.18799  | down    | 2.59020     | 3.24374     | 6.13663     | 17.25095    | Compromised | Compromised | Compromised | Detected     |
| 7532 | A_33_P3232955 | F2RL3        | Hs.137574 | coagulation factor II (thrombin) receptor-like 3            | Homo sapiens coagulation factor II (thrombin) receptor-like 3 (F2RL3), mRNA [NM_003950]                        | 1.20414 | down     | 2.08660  | down    | 861.86096   | 1074.59990  | 243.20044   | 447.47525   | Detected    | Detected    | Detected    | Detected     |
| 7533 | A_33_P3241046 |              |           |                                                             |                                                                                                                | 1.19077 | down     | 5.22807  | down    | 12.58404    | 15.51610    | 4.29955     | 19.82121    | Detected    | Compromised | Compromised | Detected     |
| 7534 | A_33_P3253179 |              |           |                                                             |                                                                                                                | 1.18942 | down     | 2.92394  | down    | 4.88307     | 6.01397     | 5.94761     | 15.33472    | Compromised | Compromised | Compromised | Detected     |
| 7535 | A_33_P3418218 | SEC16B       | Hs.709633 | SEC16 homolog B (S. cerevisiae)                             | Homo sapiens SEC16 homolog B (S. cerevisiae) (SEC16B), mRNA [NM_033127]                                        | 1.18649 | down     | 2.07409  | down    | 27.43295    | 33.70307    | 10.80077    | 19.75368    | Detected    | Detected    | Compromised | Detected     |

|      |               |              |           |                                                                         |                                                                                                                                                                                                                               |         |      |          |      |           |           |           |           |              |             |             |             |
|------|---------------|--------------|-----------|-------------------------------------------------------------------------|-------------------------------------------------------------------------------------------------------------------------------------------------------------------------------------------------------------------------------|---------|------|----------|------|-----------|-----------|-----------|-----------|--------------|-------------|-------------|-------------|
| 7536 | A_33_P3287883 | LOC100133331 | Hs.531193 | hypothetical LOC100133331                                               | Homo sapiens hypothetical LOC100133331 (LOC100133331), non-coding RNA [NR_028327]                                                                                                                                             | 1.18281 | down | 2.02823  | down | 242.45316 | 296.94427 | 104.78691 | 187.40894 | Detected     | Detected    | Detected    | Detected    |
| 7537 | A_33_P3376954 |              |           |                                                                         |                                                                                                                                                                                                                               | 1.17315 | down | 2.35542  | down | 56.59811  | 68.75227  | 36.11568  | 75.01189  | Detected     | Detected    | Detected    | Detected    |
| 7538 | A_23_P307310  | ACAN         | Hs.2159   | aggregran                                                               | Homo sapiens aggregran (ACAN), transcript variant 2, mRNA [NM_013227]                                                                                                                                                         | 1.17244 | down | 37.48496 | down | 758.06530 | 920.29830 | 17.25749  | 570.42725 | Not Detected | Detected    | Detected    | Detected    |
| 7539 | A_24_P66337   |              |           |                                                                         | Lysocardiolipin acyltransferase 1 (EC 2.3.1.51)(EC 2.3.1.-)(Acyl-CoA:lysocardiolipin acyltransferase 1)(1-acylglycerol-3-phosphate O-acyltransferase 8)(1-AGPAT 8) [Source:UniProtKB/Swiss-Prot;Acc:Q6UWP7] [ENST00000319406] | 1.17190 | down | 2.43711  | down | 4.45771   | 5.40923   | 8.04887   | 17.29719  | Compromised  | Compromised | Compromised | Detected    |
| 7540 | A_23_P167250  | IL21         | Hs.567559 | interleukin 21                                                          | Homo sapiens interleukin 21 (IL21), mRNA [NM_021803]                                                                                                                                                                          | 1.16858 | down | 4.25731  | down | 13.62057  | 16.48116  | 19.67866  | 73.87474  | Compromised  | Compromised | Detected    | Detected    |
| 7541 | A_23_P314789  | ZDHC19       | Hs.111591 | zinc finger, DHHC-type containing 19                                    | Homo sapiens zinc finger, DHHC-type containing 19 (ZDHC19), mRNA [NM_001039617]                                                                                                                                               | 1.16808 | down | 5.42814  | down | 10.42635  | 12.61063  | 4.47853   | 21.43644  | Compromised  | Compromised | Compromised | Detected    |
| 7542 | A_33_P3348220 | ENGASE       | Hs.29288  | endo-beta-N-acetylglucosaminidase                                       | Homo sapiens endo-beta-N-acetylglucosaminidase (ENGASE), mRNA [NM_001042573]                                                                                                                                                  | 1.16660 | down | 2.14179  | down | 42.04091  | 50.78405  | 17.97124  | 38.26683  | Detected     | Detected    | Detected    | Detected    |
| 7543 | A_23_P5258    | OR10H4       | Hs.553579 | olfactory receptor, family 10, subfamily H, member 4                    | Homo sapiens olfactory receptor, family 10, subfamily H, member 4 (OR10H4), mRNA [NM_001004465]                                                                                                                               | 1.16417 | down | 2.08182  | down | 20.16895  | 24.31266  | 6.01868   | 11.04865  | Detected     | Detected    | Compromised | Compromised |
| 7544 | A_33_P3269159 |              | Hs.525146 |                                                                         | Sodium leak channel non-selective protein (Voltage gated channel-like protein 1)(Canlon) [Source:UniProtKB/Swiss-Prot;Acc:Q8IZF0] [ENST00000376196]                                                                           | 1.16191 | down | 2.49645  | down | 31.24084  | 37.58620  | 13.09404  | 28.82446  | Detected     | Detected    | Compromised | Detected    |
| 7545 | A_33_P3406811 |              |           |                                                                         |                                                                                                                                                                                                                               | 1.15902 | down | 2.16487  | down | 32.85513  | 39.42999  | 10.95828  | 20.91896  | Detected     | Detected    | Compromised | Detected    |
| 7546 | A_24_P704446  | TMEM72       | Hs.292788 | transmembrane protein 72                                                | Homo sapiens transmembrane protein 72 (TMEM72), mRNA [NM_001123376]                                                                                                                                                           | 1.15322 | down | 3.30567  | down | 35.98392  | 42.96679  | 3.37527   | 9.83861   | Detected     | Detected    | Compromised | Compromised |
| 7547 | A_33_P3381836 | SPINK5L2     | Hs.553815 | Kazal type serine protease inhibitor 5-like 2                           | Homo sapiens Kazal type serine protease inhibitor 5-like 2 (SPINK5L2), mRNA [NM_001001325]                                                                                                                                    | 1.15175 | down | 5.06513  | down | 12.48289  | 14.88694  | 2.36780   | 10.57550  | Detected     | Compromised | Compromised | Compromised |
| 7548 | A_33_P3237605 |              |           |                                                                         |                                                                                                                                                                                                                               | 1.14976 | down | 2.43445  | down | 26.05947  | 31.02455  | 3.26597   | 7.01099   | Detected     | Detected    | Compromised | Compromised |
| 7549 | A_24_P136124  | LOC100131642 | Hs.680766 | PP5241                                                                  | Homo sapiens PP5241 mRNA, complete cds. [AF258585]                                                                                                                                                                            | 1.13977 | down | 2.44998  | down | 19.30365  | 22.78182  | 3.48262   | 7.52374   | Detected     | Detected    | Compromised | Compromised |
| 7550 | A_33_P3211618 |              |           |                                                                         | Homo sapiens cDNA FLJ14327 fis, clone PLACE4000250. [AK024389]                                                                                                                                                                | 1.13377 | down | 3.25614  | down | 12.67485  | 14.87990  | 4.69807   | 13.48927  | Detected     | Compromised | Compromised | Detected    |
| 7551 | A_33_P3303309 | LOC150622    |           | hypothetical LOC150622                                                  | Homo sapiens hypothetical LOC150622 (LOC150622), non-coding RNA [NR_026802]                                                                                                                                                   | 1.13018 | down | 2.38813  | down | 37.19794  | 43.53121  | 4.51605   | 9.51003   | Detected     | Detected    | Compromised | Compromised |
| 7552 | A_33_P3376958 | LOC96610     | Hs.547600 | BMS1 homolog, ribosome assembly protein (yeast) pseudogene              | Homo sapiens BMS1 homolog, ribosome assembly protein (yeast) pseudogene (LOC96610), non-coding RNA [NR_027293]                                                                                                                | 1.12984 | down | 2.17032  | down | 32.73090  | 38.29194  | 19.37193  | 37.07332  | Detected     | Detected    | Detected    | Detected    |
| 7553 | A_23_P309937  | STON2        | Hs.14248  | stonin 2                                                                | Homo sapiens stonin 2 (STON2), mRNA [NM_033104]                                                                                                                                                                               | 1.12434 | down | 20.93144 | down | 3.92606   | 4.57075   | 2.54048   | 46.88997  | Compromised  | Compromised | Compromised | Detected    |
| 7554 | A_24_P36890   | RAP1GAP      | Hs.148178 | RAP1 GTPase activating protein                                          | Homo sapiens RAP1 GTPase activating protein (RAP1GAP), transcript variant 3, mRNA [NM_002985]                                                                                                                                 | 1.12216 | down | 2.86819  | down | 28.80279  | 33.46730  | 8.39505   | 21.23230  | Detected     | Detected    | Compromised | Detected    |
| 7555 | A_33_P3292230 | LOC402160    | Hs.558938 | similar to hCG18094                                                     | PREDICTED: Homo sapiens similar to hCG18094 (LOC402160), mRNA [XM_001714276]                                                                                                                                                  | 1.11115 | down | 3.77433  | down | 2.81535   | 3.23919   | 8.37266   | 27.86561  | Compromised  | Compromised | Compromised | Detected    |
| 7556 | A_33_P3276461 |              | Hs.638428 |                                                                         | Putative uncharacterized protein C18orf33 [Source:UniProtKB/Swiss-Prot;Acc:Q8N8S9] [ENST00000434042]                                                                                                                          | 1.10893 | down | 4.05064  | down | 6.70041   | 7.69373   | 6.69193   | 23.90232  | Compromised  | Compromised | Compromised | Detected    |
| 7557 | A_24_P331128  | GNA15        | Hs.73797  | guanine nucleotide binding protein (G protein), alpha 15 (Gq class)     | Homo sapiens guanine nucleotide binding protein (G protein), alpha 15 (Gq class) (GNA15), mRNA [NM_002068]                                                                                                                    | 1.09522 | down | 2.15865  | down | 13.48052  | 15.28761  | 7.74411   | 14.79843  | Detected     | Compromised | Compromised | Detected    |
| 7558 | A_24_P151032  | MYL4         | Hs.463300 | myosin, light chain 4, alkali; atrial, embryonic                        | Homo sapiens myosin, light chain 4, alkali; atrial, embryonic (MYL4), transcript variant 2, mRNA [NM_002476]                                                                                                                  | 1.09435 | down | 2.34716  | down | 25.56050  | 28.96389  | 12.40744  | 25.67973  | Detected     | Detected    | Compromised | Detected    |
| 7559 | A_32_P51787   |              |           |                                                                         |                                                                                                                                                                                                                               | 1.08733 | down | 5.33434  | down | 43.22317  | 48.66437  | 6.47700   | 30.46633  | Detected     | Detected    | Compromised | Detected    |
| 7560 | A_33_P3274416 | LOC653712    | Hs.653243 | hypothetical LOC653712                                                  | cDNA FLJ53777, moderately similar to Intraflagellar transport 122 homolog [Source:UniProtKB/TrEMBL;Acc:BADFN1] [ENST00000448668]                                                                                              | 1.08732 | down | 2.82368  | down | 23.52210  | 26.48297  | 4.25707   | 10.59966  | Detected     | Detected    | Compromised | Compromised |
| 7561 | A_33_P3237734 | DCLK2        | Hs.591683 | doublecortin-like kinase 2                                              | Homo sapiens doublecortin-like kinase 2 (DCLK2), transcript variant 1, mRNA [NM_001040260]                                                                                                                                    | 1.08312 | down | 2.19111  | down | 14.74668  | 16.53886  | 9.22409   | 17.82189  | Detected     | Detected    | Compromised | Detected    |
| 7562 | A_23_P355447  | ZDHC22       | Hs.525485 | zinc finger, DHHC-type containing 22                                    | Homo sapiens zinc finger, DHHC-type containing 22 (ZDHC22), mRNA [NM_174976]                                                                                                                                                  | 1.08100 | down | 2.06310  | down | 16.79664  | 18.80100  | 4.86688   | 8.85396   | Detected     | Detected    | Compromised | Compromised |
| 7563 | A_23_P213620  | PPP2R2B      | Hs.655213 | protein phosphatase 2 (formerly 2A), regulatory subunit B, beta isoform | Homo sapiens protein phosphatase 2 (formerly 2A), regulatory subunit B, beta isoform (PPP2R2B), transcript variant 1, mRNA [NM_004576]                                                                                        | 1.07995 | down | 2.04919  | down | 78.53754  | 87.82407  | 6.02176   | 10.88106  | Detected     | Detected    | Compromised | Compromised |
| 7564 | A_33_P3361891 | TMPPRS7      | Hs.435490 | transmembrane protease, serine 7                                        | Homo sapiens transmembrane protease, serine 7 (TMPPRS7), transcript variant 1, mRNA [NM_001042575]                                                                                                                            | 1.07495 | down | 2.18302  | down | 21.46413  | 23.89107  | 6.57334   | 12.65347  | Detected     | Detected    | Compromised | Compromised |
| 7565 | A_33_P3380793 | C22orf34     | Hs.133159 | chromosome 22 open reading frame 34                                     | Homo sapiens chromosome 22 open reading frame 34 (C22orf34), non-coding RNA [NR_026997]                                                                                                                                       | 1.06764 | down | 2.00758  | down | 15.31921  | 16.93539  | 3.49842   | 6.19314   | Detected     | Compromised | Compromised | Compromised |

|      |               |              |           |                                                             |                                                                                                               |         |      |         |      |          |          |          |          |             |             |             |             |
|------|---------------|--------------|-----------|-------------------------------------------------------------|---------------------------------------------------------------------------------------------------------------|---------|------|---------|------|----------|----------|----------|----------|-------------|-------------|-------------|-------------|
| 7566 | A_24_P224116  | PLA2G1B      | Hs.992    | phospholipase A2, group 1B (pancreas)                       | Homo sapiens phospholipase A2, group 1B (pancreas) (PLA2G1B), mRNA [NM_000928]                                | 1.05322 | down | 4.60760 | down | 13.89026 | 15.14820 | 2.68522  | 10.90989 | Detected    | Compromised | Compromised | Compromised |
| 7567 | A_33_P3339197 | LOC647343    |           | similar to T-cell receptor beta chain V region C5 precursor | PREDICTED: Homo sapiens similar to hCG2039484 (LOC647343), mRNA [XM_001716513]                                | 1.04804 | down | 3.58349 | down | 18.00927 | 19.54380 | 5.24416  | 16.57096 | Detected    | Detected    | Compromised | Detected    |
| 7568 | A_33_P3360456 | ZNF154       | Hs.646378 | zinc finger protein 154                                     | Homo sapiens zinc finger protein 154 (ZNF154), mRNA [NM_001085384]                                            | 1.04660 | down | 2.19874 | down | 63.60870 | 68.93355 | 4.43116  | 8.59125  | Detected    | Detected    | Compromised | Compromised |
| 7569 | A_33_P3244269 | LOC100128328 |           | hypothetical LOC100128328                                   | PREDICTED: Homo sapiens hypothetical LOC100128328 (LOC100128328), mRNA [XM_001715053]                         | 1.04495 | down | 2.91820 | down | 32.97806 | 35.68229 | 16.15148 | 41.56165 | Detected    | Detected    | Detected    | Detected    |
| 7570 | A_23_P24898   | OR51D1       | Hs.553728 | olfactory receptor, family 51, subfamily D, member 1        | Homo sapiens olfactory receptor, family 51, subfamily D, member 1 (OR51D1), mRNA [NM_001004751]               | 1.04423 | down | 3.03548 | down | 10.66537 | 11.53198 | 9.73478  | 26.05664 | Compromised | Compromised | Compromised | Detected    |
| 7571 | A_33_P3397613 |              |           |                                                             |                                                                                                               | 1.04332 | down | 2.04892 | down | 48.83320 | 52.75506 | 15.42836 | 27.87464 | Detected    | Detected    | Detected    | Detected    |
| 7572 | A_33_P3320832 | NMS          | Hs.567676 | neuromedin S                                                | Homo sapiens neuromedin S (NMS), mRNA [NM_001011717]                                                          | 1.03558 | down | 3.13612 | down | 9.34217  | 10.01763 | 9.06217  | 25.06055 | Compromised | Compromised | Compromised | Detected    |
| 7573 | A_33_P3357337 |              | Hs.430646 |                                                             | Cyclin-C (SRB11 homolog)(hSRB11) [Source:UniProtKB/Swiss-Prot;Acc:P24863] [ENST00000482541]                   | 1.03306 | down | 8.28890 | down | 12.83978 | 13.73455 | 5.24702  | 38.35085 | Detected    | Compromised | Compromised | Detected    |
| 7574 | A_32_P232192  |              | Hs.471637 |                                                             | DIS3-like exonuclease 2 (EC 3.1.13.-) [Source:UniProtKB/Swiss-Prot;Acc:Q8IYB7] [ENST00000273009]              | 1.02550 | down | 2.81076 | down | 36.26960 | 38.51354 | 25.61072 | 63.47631 | Detected    | Detected    | Detected    | Detected    |
| 7575 | A_33_P3265304 |              |           |                                                             | Uncharacterized protein C20orf4 [Source:UniProtKB/Swiss-Prot;Acc:Q9Y312] [ENST00000397286]                    | 1.02023 | down | 2.64394 | down | 18.69924 | 19.75395 | 8.43305  | 19.66085 | Detected    | Detected    | Compromised | Detected    |
| 7576 | A_24_P314515  | C12orf27     | Hs.612351 | chromosome 12 open reading frame 27                         | Homo sapiens chromosome 12 open reading frame 27 (C12orf27), non-coding RNA [NR_024345]                       | 1.01046 | down | 3.12262 | down | 19.85997 | 20.77937 | 3.79779  | 10.45722 | Detected    | Detected    | Compromised | Compromised |
| 7577 | A_33_P3258127 | LOC100132188 |           | LP7097                                                      | Homo sapiens LP7097 mRNA, complete cds. [AY203946]                                                            | 1.00931 | down | 2.35056 | down | 32.21721 | 33.67026 | 14.37706 | 29.79938 | Detected    | Detected    | Detected    | Detected    |
| 7578 | A_33_P3314401 | CLDN16       | Hs.251391 | claudin 16                                                  | Homo sapiens claudin 16 (CLDN16), mRNA [NM_006580]                                                            | 1.00870 | down | 2.73043 | down | 62.00291 | 64.75975 | 7.79909  | 18.77761 | Detected    | Detected    | Compromised | Detected    |
| 7579 | A_24_P118527  | GIPC3        | Hs.266873 | GIPC PDZ domain containing family, member 3                 | Homo sapiens GIPC PDZ domain containing family, member 3 (GIPC3), mRNA [NM_133261]                            | 1.00785 | down | 3.35746 | down | 61.62061 | 64.30640 | 21.27171 | 62.97651 | Detected    | Detected    | Detected    | Detected    |
| 7580 | A_33_P3422213 | NEK10        | Hs.506115 | NIMA (never in mitosis gene a)-related kinase 10            | Homo sapiens NIMA (never in mitosis gene a)-related kinase 10 (NEK10), transcript variant 3, mRNA [NM_199347] | 1.00312 | down | 2.21369 | down | 22.79477 | 23.67672 | 6.72997  | 13.13697 | Detected    | Detected    | Compromised | Compromised |
