# Supplementary material for: Lactic Acid Bacteria Convert Human Fibroblasts to Multipotent Cells
Source: PubMed Central journal article supplement (PMC3530539; doi:10.1371/journal.pone.0051866), 2012-12-26
Supplement: pone.0051866.s012.pdf [file pone.0051866.s012.pdf]

Supplementary Table 3: List of cluster genes that shows the difference by a factor of two or more between LAB-incorporated cell clusters-1vs HDF-1& LAB-incorporated cell clusters-2 v sHDF-2

| Genes included in I | Genes included in II-1 | Genes included in II-2 | Genes included in III |
|---------------------|------------------------|------------------------|-----------------------|
| KCNB1               | COL4A6                 | unknown                | HOXC8                 |
| RPS4Y1              | IL13                   | MMP25                  | HOXA9                 |
| RPS4Y2              | TMEM108                | unknown                | HOXB5                 |
| TDRD6               | PLIN5                  | SLC30A3                | HAPLN1                |
| ADH1B               | UNQ2963                | TGM7                   | HOXC10                |
| LHX8                | GRM1                   | SEC16B                 | HOXA11                |
| DDX3Y               | LOC100132652           | SYT15                  | HOXA10                |
| TAC1                | PFKFB2                 | LOC401164              | KRTAP1-1              |
| CNR1                | LOC100128402           | BCL2                   | CLSPN                 |
| NCRNA00185          | FBLL1                  | NEK10                  | ALOX5AP               |
| ZFY                 | C7orf63                | TMPRSS7                | HOXB7                 |
| C6orf176            | FLJ41309               | OR10H4                 | HOXB8                 |
| SPINK4              | FLJ44253               | ZDHC22                 | DEPDC1                |
| KYNU                | GOLGA8F                | CDC6                   | MPPED2                |
| ADH1A               | FOXP2                  | CSAG1                  | unknown               |
| USP9Y               | unknown                | OR2A1                  | WNT2                  |
| THSD7A              | HAVCR2                 | RAP1GAP                | CYP3A5                |
| Cyorf15B            | SOBP                   | FSHR                   | unknown               |
| ADAMTS8             | MAOB                   | LOC100131165           | HOXB3                 |
| CLMN                | unknown                | RNF125                 | LOC100133311          |
| LONRF3              | LOC100130798           | RIMS3                  | HOXA7                 |
| BARX1               | AIF1                   | unknown                | NEIL3                 |
| MYLK4               | MCOLN3                 | unknown                | DOK7                  |
| HLF                 | CYB5RL                 | SLA                    | LYPD6                 |
| CPLX1               | MOG                    | unknown                | KANK4                 |
| C21orf121           | SUV420H1               | unknown                | E2F8                  |
| MOBK12B             | unknown                | LOC100129129           | HOXA3                 |
| SLITRK2             | RRAGD                  | SLC4A1                 | HOXA13                |
| EIF1AY              | LRCH1                  | unknown                | NEK2                  |
| MKRN3               | C6orf170               | P2RX3                  | FCRLA                 |
| SP5                 | ANKRD5                 | LOC440028              | TEK                   |
| MUM1L1              | LOC100128386           | CASP2                  | PAX6                  |
| SERPINB3            | LOC645225              | KRTAP19-7              | ESCO2                 |
| IL18R1              | ADAMTS17               | LIN9                   | LOC100132588          |
| unknown             | FLJ33065               | HAAO                   | SCRG1                 |
| KIAA1045            | SLC14A1                | unknown                | UNC13C                |
| DAZL                | unknown                | unknown                | C8orf47               |
| CCDC40              | PYY                    | BPIL1                  | LOC100133311          |
| MERTK               | FNDC3A                 | unknown                | LYPD1                 |
| UTY                 | RAB9B                  | OR4D10                 | unknown               |
| FZD10               | ZNF454                 | unknown                | CLEC1A                |
| ZNF204              | unknown                | unknown                | unknown               |
| EFHB                | LOC100128336           | unknown                | SLN                   |
| DNASE1L3            | P2RX6                  | INS                    | unknown               |
| unknown             | unknown                | GNB3                   | NEDD9                 |
| INMT                | MADCAM1                | unknown                | SPP1                  |
| WDR86               | ZNF510                 | ANXA2                  | ESCO2                 |
| CXCR4               | unknown                | TNNT2                  | LIMCH1                |
| IL18R1              | LOC283587              | LOC100129048           | UCP2                  |
| NOVA1               | LOC284561              | DEFB124                | CENPI                 |
| CAPN12              | unknown                | hCG_1817208            | E2F7                  |
| SOBP                | PROM2                  | HIST1H2AA              | HOXA2                 |
| ABLIM2              | MOBK12B                | FLJ46020               | PTPRB                 |
| C6orf221            | LOC650794              | unknown                | RARB                  |
| ABLIM2              | unknown                | PTPN20B                | TBX1                  |
| GAS2                | unknown                | unknown                | TBX5                  |
| CDON                | LOC727869              | FAM129C                | SDPR                  |
| LY75                | LOC100292961           | LOC286186              | RASGRP1               |
| KCNJ4               | UBD                    | LOC145845              | LOC283392             |
| PAGE2B              | ZFP14                  | unknown                | PADI1                 |
| C9orf68             | STMN4                  | IGFL2                  | GRIA1                 |
| MCTP2               | unknown                | unknown                | LYPD6B                |
| LOC100129973        | TMSB4Y                 | MGC16703               | MYL10                 |
| EYA4                | LOC284648              | MAST4                  | C2orf48               |
| LOC100131354        | PURG                   | LOC285762              | HIST1H2AI             |
| LOC283867           | LOC100129767           | ERLIN2                 | LOC100131594          |
| LRP1B               | RANBP2                 | C5orf49                | AFP                   |
| TTYH2               | LOC648149              | unknown                | COL6A6                |
| PPIL6               | C1orf170               | TRPC3                  | ANGPTL7               |
| MUC20               | KIF5C                  | FAM111B                | unknown               |
| REPS2               | LOC389834              | ABCA10                 | MYBL1                 |
| ASTN1               | BHLHA9                 | HIST1H4A               | LITD1                 |
| LOC253962           | unknown                | ADAMTS14               | LOC100129619          |
| SOHLH2              | DIO3                   | LOC100132672           | CKM                   |
| SEC14L5             | FLJ40852               | HIST1H4D               | WISP1                 |
| RASL12              | LAMP3                  | unknown                | unknown               |
| THRB                | LRFN2                  | LOC344967              | PNLDC1                |
| C17orf60            | RSPH1                  | BTBD9                  | OPCML                 |
| unknown             | GABRD                  | ANKRD26P1              | AS3MT                 |
| IL18RAP             | unknown                | LOC100131099           | HOXC4                 |
| NLGN4Y              | INADL                  | GRIA2                  | ODZ2                  |
| unknown             | CACNA1G                | TTCC23                 | XIST                  |
| LEFTY1              | unknown                | GP1BA                  | HOXA4                 |
| ARHGAP28            | ODF3L1                 | MYO5C                  | SORBS2                |
| MAPK10              | NUP62CL                | unknown                | HOXC6                 |
| NLGN4Y              | RAPGEF5                | OR10G2                 | LOC100132588          |
| KRTDAP              | LOC152286              | TMPRSS8                | SPC24                 |
| LOC642924           | unknown                | PGA3                   | LYPD6                 |
| RGS7                | FLJ11710               | NCRNA00095             | MKI67                 |
| SLC40A1             | FLJ32810               | LOC643475              | SP140                 |
| ST8SIA1             | FMO4                   | LOC100287245           | HOXB6                 |
| unknown             | BZRAP1                 | GEN1                   | MKI67                 |
| CABP1               | LOC100128071           | LOC644992              | SLCO2A1               |
| CCL8                | FRMD4B                 | unknown                | CDH16                 |
| LOC151438           | HORMAD1                | RBMX                   | SFXN2                 |
| NR3C2               | ATP12A                 | BCMO1                  | H19                   |
| SCARA5              | LOC729739              | LOC100134365           | EPR1                  |
| TM4SF18             | KCNA3                  | unknown                | NPPC                  |
| GSTT1               | ZNF846                 | KCNN2                  | LOC100132878          |
| ARG1                | unknown                | OR6C74                 | KRT17                 |
| USP9Y               | TAS2R19                | SULT1B1                | unknown               |
| MYCN                | LOC644949              | LOC643371              | SCIN                  |
| VENTX               | LOC388279              | unknown                | SGCG                  |
| SLITRK5             | GLS2                   | OR5C1                  | PALM2                 |



|              |
|--------------|
| LOC100130232 |
| ZBTB46       |
| SPTLC3       |
| RSP01        |
| PRKAA2       |
| UNC13A       |
| TXLNB        |
| GLIPR1L2     |
| TMEM132B     |
| BCAS1        |
| ESPNL        |
| unknown      |
| PTPRD        |
| CCDC144B     |
| PNMA2        |
| GJB2         |
| HULC         |
| LOC440173    |
| ARG1         |
| DIRC3        |
| unknown      |
| LOC729076    |
| WNK2         |
| LOC646870    |
| ATP8B4       |
| PHACTR3      |
| FLJ13156     |
| NOD2         |
| LOC100131089 |
| LOC100127967 |
| CXorf50      |
| MOBKLB2      |
| TRIL         |
| C9orf171     |
| AQP7P1       |
| PPF1A2       |
| LOC284276    |
| CCL20        |
| C7orf52      |
| NFIB         |
| KCNC1        |
| CACNB2       |
| SYN2         |
| COL21A1      |
| MEOX1        |
| HSPA12B      |
| CD52         |
| ADHFE1       |
| MTUS2        |
| CYP19A1      |
| UNC5CL       |
| WDR52        |
| PCSK1        |
| ADH4         |
| SLC26A7      |
| MACROD2      |
| LOC100130331 |
| CES4         |
| UTY          |
| C10orf79     |
| EMCN         |
| PRR5-ARHGAP8 |
| PLIN4        |
| FAM47E       |
| PPL          |
| MAPT         |
| SCN5A        |
| SERPINB4     |
| unknown      |
| FMO3         |
| GIMAP2       |
| GDF9         |
| C10orf58     |
| CA11         |
| unknown      |
| RALGPS1      |
| CXorf1       |
| RPGRIP1      |
| LOC391322    |
| IRX4         |
| LOC729885    |
| APOD         |
| JAKMIP2      |
| LOC401630    |
| ELF3         |
| STRC         |
| DLL1         |
| BEX5         |
| LOC100291851 |
| PLK5P        |
| CHI3L2       |
| SHC3         |
| GTF2A1L      |
| IL18R1       |
| ACCN3        |
| CCL7         |
| ZP4          |
| C7orf46      |
| CACNG6       |
| ANKRD6       |
| MLXIPL       |
| CUL3         |
| C6orf81      |
| unknown      |
| NFE2         |
| TMEM132B     |
| NKD2         |
| IL1RL1       |

|              |
|--------------|
| PHACTR1      |
| POU3F3       |
| LOC100292758 |
| unknown      |
| CCL3L3       |
| C21orf49     |
| IL15RA       |
| VCX2         |
| unknown      |
| SC5DL        |
| DDX17        |
| DPY19L3      |
| NRTN         |
| TCERG1L      |
| SLC35F4      |
| DKFZp761E198 |
| ARL10        |
| SPIN3        |
| APOL6        |
| C4orf36      |
| EBF1         |
| DBNDD1       |
| ZNF3         |
| C4orf26      |
| LOC400756    |
| FCGR2A       |
| MATN4        |
| RAB9B        |
| FAM91A1      |
| CPNE2        |
| SYNGAP1      |
| LOC100128655 |
| unknown      |
| EEF1A2       |
| RGL3         |
| LOC100128077 |
| unknown      |
| CYP11B2      |
| LOC100128392 |
| SLC5A6       |
| PARD6A       |
| PHACTR1      |
| GEFT         |
| VMO1         |
| unknown      |
| TMOD1        |
| WDR27        |
| LOC643669    |
| MORN1        |
| FTCD         |
| MIAT         |
| unknown      |
| IQCH         |
| KIAA1530     |
| LAPTMS       |
| GPR77        |
| ZNF599       |
| BCAR4        |
| EFNA3        |
| CCDC147      |
| BMP7         |
| C18orf34     |
| unknown      |
| LOC145678    |
| C11orf66     |
| C19orf38     |
| SCAND3       |
| unknown      |
| NOXA1        |
| unknown      |
| CLSTN3       |
| PRSS35       |
| NFIA         |
| unknown      |
| MXI1         |
| LOC440356    |
| SCNN1D       |
| ARHGEF19     |
| CYTH4        |
| TEKT5        |
| PTPN22       |
| LOC440983    |
| LOC401052    |
| LOC158863    |
| DPY19L2P1    |
| C9orf43      |
| LOC100131582 |
| NHLRC4       |
| CSDC2        |
| LOC729040    |
| LOC729467    |
| unknown      |
| HSF2BP       |
| GEFT         |
| ATPBD4       |
| MYOM1        |
| FLJ41603     |
| IL3RA        |
| CEBPA        |
| TSNAXIP1     |
| LOC100130093 |
| DDX3Y        |
| PDE3B        |
| OR9A2        |
| LOC100128402 |
| C12orf68     |
| OR2T5        |
| unknown      |

|              |
|--------------|
| NDE1         |
| CECR7        |
| C8orf60      |
| CLTB         |
| TPPP         |
| CLCN5        |
| PRHL         |
| ZNF259P      |
| SETD1B       |
| LOC340508    |
| LOC732419    |
| SLC43A2      |
| LOC441046    |
| tcag7.1213   |
| unknown      |
| unknown      |
| DLC1         |
| CEP110       |
| unknown      |
| ICA1L        |
| hCG_1645220  |
| ZNF286A      |
| ARL4A        |
| KIT          |
| CCNYL1       |
| SDC2         |
| NTF3         |
| unknown      |
| RBMX         |
| SYNE1        |
| LOC100129794 |
| CENPK        |
| NALCN        |
| LOC100130927 |
| SPEF2        |
| ITGA2        |
| SH2D1A       |
| LOC100128059 |
| LOC100130433 |
| unknown      |
| unknown      |
| FAM84A       |
| unknown      |
| C7orf29      |
| CLASP1       |
| AHSP         |
| SUPT3H       |
| C21orf90     |
| unknown      |
| LOC728752    |
| unknown      |
| EPB49        |
| unknown      |
| TSPO2        |
| LOC100128430 |
| EXOG         |
| FAM196B      |
| LRP2         |
| WDR63        |
| ZNF257       |
| SEMA4F       |
| hCG_2045830  |
| ZNF442       |
| EVI2B        |
| FAM13AOS     |
| unknown      |
| DEPDC5       |
| FLJ35024     |
| WNK4         |
| LOC728613    |
| SMC4         |
| MYL2         |
| TPM3         |
| CCGM2        |
| unknown      |
| OSTCL        |
| unknown      |
| CSF1         |
| unknown      |
| unknown      |
| LOC100132672 |
| TMEM217      |
| LOC401233    |
| TNR          |
| unknown      |
| C10orf82     |
| unknown      |
| ARHGAP30     |
| tcag7.1227   |
| RIT2         |
| SRMS         |
| DAD1L        |
| LOC100133660 |
| IL1F7        |
| ALG1         |
| HNRNPCL1     |
| unknown      |
| CTS2         |
| SLC35A3      |
| ANXA2P3      |
| NDST1        |
| TMED9        |
| CABIN1       |
| ELK4         |
| unknown      |
| KIAA0564     |
| C10orf35     |

|             |
|-------------|
| unknown     |
| FAM72A      |
| RACGAP1P    |
| unknown     |
| TPX2        |
| CENPM       |
| KIF15       |
| unknown     |
| ALDH4A1     |
| CCDC134     |
| DHRS2       |
| NRG1        |
| TROAP       |
| CCNF        |
| POLQ        |
| FGF1        |
| C6orf191    |
| FOXM1       |
| BUB1B       |
| NUF2        |
| KIFC1       |
| PLD5        |
| TRIP13      |
| TROAP       |
| FARP1       |
| unknown     |
| COBLL1      |
| GRB14       |
| DEPDC1B     |
| CCDC80      |
| F2RL1       |
| DPEP1       |
| MMP10       |
| STIL        |
| ESM1        |
| unknown     |
| unknown     |
| LIMCH1      |
| FAM169A     |
| CNGA3       |
| ARHGAP11A   |
| APOA1       |
| SKA1        |
| NRG1        |
| MXRA5       |
| unknown     |
| KANK4       |
| RAMP1       |
| DIAPH3      |
| ABI3BP      |
| LRFN5       |
| CKAP2L      |
| CCDC116     |
| GIPC2       |
| LBH         |
| HMSD        |
| HOPX        |
| HEATR7A     |
| unknown     |
| FAM196A     |
| TMEM106A    |
| hCG_2045048 |
| unknown     |
| LOC732272   |
| KIRREL3     |
| MYEF2       |
| RPS6KL1     |
| ZNF812      |
| COL15A1     |
| HIST1H3H    |
| ZNF730      |
| LPPR4       |
| C12orf48    |
| HILLS1      |
| HTR2A       |
| SLC38A4     |
| FKTN        |
| CEP55       |
| ODZ2        |
| SKA3        |
| CASC5       |
| ITGA6       |
| MPZL3       |
| KIF20A      |
| FND5        |
| NEK2        |
| MATN2       |
| P2RY6       |
| FAM64A      |
| CCDC88C     |
| TTK         |
| STRA6       |
| DIAPH3      |
| HOXB4       |
| ERCC6L      |
| CTAG1A      |
| HOXC9       |
| GREB1L      |
| CDC25C      |
| NGFR        |
| HOXB2       |
| ITGA6       |
| HIST1H2BF   |
| FAM101A     |
| FGF1        |
| LOC283392   |
| KIF18A      |
| MMP12       |

|              |
|--------------|
| CCDC114      |
| APOC2        |
| C10orf11     |
| unknown      |
| NTN1         |
| AK7          |
| unknown      |
| EFHB         |
| TSPAN7       |
| KIF6         |
| unknown      |
| MAPK10       |
| CCDC102B     |
| FAM78B       |
| TBC1D3B      |
| TMEM178      |
| FAM20A       |
| MYL3         |
| CHGB         |
| HGF          |
| MAML3        |
| CCDC151      |
| C15orf33     |
| LAMC3        |
| TRIM50       |
| TFAP2A       |
| LOC80054     |
| unknown      |
| FBXW10       |
| RHOJ         |
| LPAR3        |
| FAAH2        |
| DNHD1        |
| C17orf98     |
| KLRC1        |
| unknown      |
| OVOL1        |
| HORMAD1      |
| JAKMIP2      |
| SLC47A1      |
| unknown      |
| RGL3         |
| CADM3        |
| SFTPB        |
| ANXA9        |
| SEMA6D       |
| PODXL2       |
| LOC339539    |
| ABCC8P1      |
| unknown      |
| unknown      |
| ASXL3        |
| CCDC52       |
| P2RX7        |
| LOC728800    |
| NRARP        |
| PURG         |
| DRD2         |
| unknown      |
| IL20         |
| OXGR1        |
| unknown      |
| CCDC144A     |
| ZMAT1        |
| LOC283713    |
| RGMA         |
| unknown      |
| RBMY1B       |
| RET          |
| TBPL2        |
| PGM5P1       |
| LAMB4        |
| CCDC144A     |
| IL16         |
| WFDC10B      |
| CHRD1        |
| ALPK3        |
| SCGB1D1      |
| FLJ37638     |
| ALDH1A2      |
| SAMD13       |
| ANKRD43      |
| LOC100129950 |
| C10orf67     |
| RNF32        |
| KCND1        |
| unknown      |
| C20orf202    |
| ZNF323       |
| FLJ25694     |
| CALCRL       |
| FAM106A      |
| unknown      |
| CYP26B1      |
| MMP13        |
| MSR1         |
| ELANE        |
| SYT12        |
| TMTG2        |
| TMEM100      |
| DIO2         |
| unknown      |
| VWA1         |
| ROR2         |
| SIRPD        |
| C1QTNF4      |
| PLCXD3       |
| NR4A2        |

|              |
|--------------|
| unknown      |
| GRM8         |
| UBQLNL       |
| LOC151657    |
| LOC284475    |
| LOC100129555 |
| LOC654841    |
| PPM1B        |
| HGN2         |
| C10orf68     |
| ZNF518A      |
| NCRNA00174   |
| C8orf45      |
| LOC100128402 |
| MLLT6        |
| MIER3        |
| STX1B        |
| FBXW2        |
| LOC100131271 |
| PARK2        |
| RASGRP2      |
| GCH1         |
| unknown      |
| LOC728650    |
| ZNF365       |
| KIF9         |
| SCN1B        |
| AGTPBP1      |
| KDM5D        |
| FAM69B       |
| ZNF585A      |
| EFCAB1       |
| DHDH         |
| EGR3         |
| TBXAS1       |
| TNIK         |
| DMRTA1       |
| C19orf51     |
| unknown      |
| ANKLE1       |
| EBF4         |
| OSBP2        |
| LOC100130057 |
| C21orf89     |
| LOC100288667 |
| ORTG1        |
| NCRNA00171   |
| B3GNT3       |
| MSX2         |
| unknown      |
| LOC253264    |
| ST3GAL6      |
| CHST1        |
| unknown      |
| TMEM150C     |
| PXMP3        |
| C3orf35      |
| MUCL1        |
| DUSP13       |
| PR47         |
| unknown      |
| unknown      |
| unknown      |
| LOC286071    |
| EDN2         |
| CCDC68       |
| LOC643770    |
| MSMB         |
| ANKRD12      |
| IGDCC3       |
| RIMS3        |
| GOLGA6A      |
| C17orf69     |
| LOC338817    |
| C1orf129     |
| FLJ41455     |
| EML6         |
| SRGAP3       |
| LOC100133039 |
| TNFSF4       |
| FZD3         |
| RSPH1        |
| MGAT5B       |
| unknown      |
| ZNF695       |
| CSAG3        |
| C14orf34     |
| DTNB         |
| unknown      |
| EFCAB5       |
| NARG2        |
| TMEM135      |
| unknown      |
| TMEM30B      |
| PRRT4        |
| CDADC1       |
| unknown      |
| TRIM66       |
| SOX12        |
| PPP4R4       |
| GPRASP1      |
| LOC154761    |
| TP53TG3      |
| CCDC113      |
| PIK3C2B      |
| AMN1         |
| LOC439949    |
| FLJ46875     |

|              |
|--------------|
| ZNF876P      |
| ZNF683       |
| unknown      |
| LOC554174    |
| TRIM14       |
| TBC1D28      |
| IL1RL2       |
| LILRB3       |
| TNF          |
| NPY          |
| HIST3H2BB    |
| FSD1L        |
| LOC100132966 |
| PIGN         |
| MAP7         |
| PSG8         |
| HHIPL2       |
| PHACTR4      |
| KLC4         |
| VN1R5        |
| unknown      |
| GLYAT        |
| PAX3         |
| GTF2A2       |
| AEN          |
| FLJ44606     |
| GPI          |
| TUBA1C       |
| KLF6         |
| SEC13        |
| PTP4A1       |
| ISG15        |
| DPH3         |
| P4HA1        |
| CFL2         |
| BZW2         |
| LOC644563    |
| TBCE         |
| TMEM126A     |
| MARCKS       |
| LHFP         |
| GLTPD1       |
| MORF4L2      |
| RAN          |
| EIF1AX       |
| HMGB1L1      |
| SP100        |
| CORO1C       |
| EIF1AX       |
| SRRT         |
| ARF4         |
| TALDO1       |
| RPN2         |
| PPP1R14B     |
| TBC1D22A     |
| FEZ2         |
| MYO9B        |
| ANKRD13A     |
| MED10        |
| MRPL12       |
| LOC388796    |
| LPXN         |
| ELF4         |
| TXNL4A       |
| CLDN11       |
| TM7SF3       |
| ABL2         |
| MYOF         |
| LOC728190    |
| YWHAH        |
| TMEM200A     |
| ABCA1        |
| MICB         |
| MRPL12       |
| CXCL2        |
| RFTN1        |
| ACOT9        |
| ATP2B4       |
| HSPB1        |
| FKBP1A       |
| CLU          |
| TMEM110      |
| unknown      |
| WDR18        |
| unknown      |
| RRP1         |
| CKAP5        |
| SPPL2A       |
| COL5A2       |
| TMEM47       |
| FARP1        |
| GLIS1        |
| BLCAP        |
| PIN4         |
| GPX8         |
| BLOC1S3      |
| SSR1         |
| C6orf89      |
| MAPRE1       |
| RTCD1        |
| NF2          |
| TSR2         |
| NDE1         |
| HNRNPL       |
| DOK1         |
| SEPT11       |
| SFRS3        |
| SRA1         |

|              |
|--------------|
| ASPM         |
| SGOL1        |
| HOXA5        |
| STRA6        |
| CCDC85A      |
| PLK4         |
| ZNF695       |
| ZFP57        |
| unknown      |
| unknown      |
| SPATA22      |
| ARHGAP11A    |
| NCAPG        |
| CASP10       |
| CTAG2        |
| AURKB        |
| HOXA11AS     |
| PLK1         |
| ISPD         |
| unknown      |
| PODN         |
| SORBS2       |
| PPP1R14C     |
| FCRLA        |
| PNMT         |
| PLK1         |
| GZMK         |
| GFI1         |
| FCRL4        |
| HAND2        |
| TMEM90B      |
| PCOTH        |
| FAM183A      |
| NEDD9        |
| LOC100133690 |
| LOC100288900 |
| GDF6         |
| unknown      |
| LOC100129617 |
| unknown      |
| PCSK9        |
| unknown      |
| MYB          |
| SGOL1        |
| GPRI26       |
| HOXC11       |
| PTPN20B      |
| LOC730091    |
| PRLR         |
| CCDC73       |
| LOC100240734 |
| CACNA2D3     |
| LOC285943    |
| WDR62        |
| CALGR        |
| GRIK2        |
| PHTF2        |
| IL7          |
| unknown      |
| LOC100131726 |
| NCRNA00200   |
| DNAH17       |
| LOC100130580 |
| NAP1L3       |
| LOC389300    |
| SHISA9       |
| TGFB2        |
| FANGD2       |
| TPD52        |
| HIST1H2AL    |
| PFTK2        |
| LIPG         |
| HOXA6        |
| HBE1         |
| HOXD9        |
| FAM125B      |
| CCNE2        |
| P2RY2        |
| KIF24        |
| SPTB         |
| MYPN         |
| unknown      |
| ADRA2A       |
| MCM10        |
| FLT1         |
| NMU          |
| TMPO         |
| NAT8L        |
| ERN2         |
| SIM2         |
| NCAPH        |
| TSPAN15      |
| NOSTRIN      |
| LOC255480    |
| EIF2A        |
| RBL1         |
| C15orf54     |
| EMB          |
| LOC100292680 |
| NEK10        |
| HOXB9        |
| CACNA2D3     |
| LOC339240    |
| unknown      |
| PLXNA4       |
| RNU4ATAC     |
| LOC731656    |
| SLC28A3      |

|              |
|--------------|
| BCAS1        |
| SUGT1L1      |
| ST8SIA4      |
| CCDC102B     |
| PPIL6        |
| LOC729088    |
| BCL6B        |
| NUDT10       |
| CTSS         |
| OCA2         |
| KIAA1712     |
| FAM66C       |
| C1orf125     |
| PLEKHG1      |
| FAM66C       |
| TNFRSF17     |
| JAG2         |
| NOS2         |
| SCGB1D2      |
| TTC39A       |
| CAMP         |
| LOC200772    |
| FLJ42289     |
| C7orf45      |
| ATP8A1       |
| SH2D3C       |
| SLC6A7       |
| unknown      |
| KBTBD3       |
| SCARNA10     |
| PDDHA3       |
| PTPRH        |
| TMEM176B     |
| LOC100131180 |
| TMEM155      |
| DDCG2        |
| LRFN1        |
| GLB1L2       |
| PECAM1       |
| EXD3         |
| HAUS3        |
| MITF         |
| LOC55908     |
| LOC100132653 |
| CD7          |
| SLC19A3      |
| RASGRF2      |
| GDF10        |
| CRABP1       |
| TMEM86A      |
| EGLN3        |
| PPP4R4       |
| EFCAB6       |
| RFPL1S       |
| SLC25A18     |
| LOC253039    |
| XGYP2        |
| NTSR1        |
| NCRNA00110   |
| TDRD1        |
| DNAI1        |
| unknown      |
| unknown      |
| TYRP1        |
| SLC8A2       |
| unknown      |
| KIAA1377     |
| ABLIM1       |
| CR2          |
| C6orf217     |
| AGAP2        |
| ZNF540       |
| ARHGEF7      |
| LOC100134240 |
| STX19        |
| TDO2         |
| MSTP9        |
| unknown      |
| unknown      |
| CCNJL        |
| SLC25A41     |
| unknown      |
| HYDIN        |
| HS3ST6       |
| TXK          |
| ZNF160       |
| LOC339524    |
| ADAMDEC1     |
| HLA-DQB1     |
| TSSK4        |
| LOC100131053 |
| CCDC17       |
| ZNF711       |
| LEKR1        |
| LOC285696    |
| PCDH10       |
| DAZ2         |
| GSDMC        |
| LOC285965    |
| CDC14A       |
| MARK1        |
| unknown      |
| LOC440117    |
| C21orf81     |
| SYT1         |
| ZNF541       |
| unknown      |
| C12orf33     |

|              |
|--------------|
| ST6GALNAC3   |
| KIF27        |
| KIAA1671     |
| KLHDC1       |
| NFIB         |
| CA9          |
| C1orf204     |
| NPL          |
| EMR2         |
| unknown      |
| LMOD1        |
| IFNAP22      |
| DDX26B       |
| SAMD13       |
| OTUD7A       |
| LOC729417    |
| STK38L       |
| C2orf34      |
| C10orf4      |
| LOC653602    |
| NRG2         |
| C12orf53     |
| GOLGA8A      |
| PTPN3        |
| PTGFR        |
| RAD21L1      |
| LPHN2        |
| GHR          |
| SENP6        |
| LOC441666    |
| C1orf162     |
| HCP5P10      |
| LPPR3        |
| C19orf54     |
| DNHD1        |
| unknown      |
| unknown      |
| MCOLN2       |
| ITGB4        |
| C6orf138     |
| DENND2A      |
| PNMA6A       |
| RAB20        |
| ARHGEF16     |
| TNS4         |
| TRIM7        |
| PEX11G       |
| ODF3B        |
| BCL9         |
| SLC44A3      |
| MMP23B       |
| C12orf66     |
| POM121L1P    |
| IFT140       |
| NXPH3        |
| LRR0C56      |
| CYFIP2       |
| TNNT1        |
| CD9          |
| FAM90A10     |
| CXCL16       |
| ESPNL        |
| C15orf51     |
| MGC42105     |
| SPIRE2       |
| WDR78        |
| CSF3         |
| SLC26A10     |
| TMEM190      |
| IL24         |
| GCHFR        |
| NROB1        |
| TRAPPC6A     |
| CYP19A1      |
| NAMPT        |
| FHIT         |
| C20orf96     |
| LOC142937    |
| PROC         |
| LAMC3        |
| IFT74        |
| FAM124A      |
| SLC16A7      |
| unknown      |
| C22orf41     |
| FAM171B      |
| C1orf115     |
| LOC729130    |
| TOP11L2      |
| ADCK4        |
| CITED1       |
| TTC29        |
| SYNGR1       |
| CES1         |
| DLK2         |
| ZMYND10      |
| ZNF521       |
| GBP5         |
| KANK3        |
| ADSSL1       |
| PLTP         |
| ARSG         |
| KCNK4        |
| LOC100294391 |
| FXYD3        |
| CIRBP        |
| HSD17B6      |
| LYG1         |

|           |
|-----------|
| ANKRD39   |
| NACC1     |
| SUMF2     |
| FOXQ1     |
| KIAA1609  |
| AHR       |
| GLIPR1    |
| SAE1      |
| BAT1      |
| ZFP64     |
| MCM8      |
| ASAP2     |
| UBE2V1    |
| UFM1      |
| UCHL3     |
| PAIP1     |
| PAK1      |
| YIPF2     |
| GMPS      |
| SPON2     |
| TMEM48    |
| TMEM117   |
| RPL23A    |
| C19orf42  |
| CIT       |
| PIF1      |
| C4orf46   |
| AK5       |
| SMS       |
| GNB4      |
| H2AFV     |
| RPL22L1   |
| HNRNPD    |
| FAM167A   |
| TRAM2     |
| TUBB6     |
| PPP1R14B  |
| HSP90B1   |
| PGAM1     |
| TPM3      |
| PCTK1     |
| ATP6V0C   |
| BCL2L12   |
| CLIC1     |
| EFEMP2    |
| TPM2      |
| RPSAP52   |
| MYL6      |
| PPIF      |
| POP7      |
| FHL2      |
| CALR      |
| P4HB      |
| ANXA2     |
| CYR61     |
| OFL1      |
| B4GALT2   |
| LDHA      |
| RANGAP1   |
| SNRPF     |
| SNRPA     |
| OFL1      |
| BZW2      |
| MAP4      |
| KLC1      |
| SERPINH1  |
| PTGIR     |
| LRFN4     |
| PTRF      |
| RNF126    |
| SNRPA1    |
| DCBLD2    |
| BOLA3     |
| GTF3C6    |
| DUS3L     |
| FAM110A   |
| DIXDC1    |
| POLE3     |
| CXCL12    |
| IMPDH1    |
| ATAD3B    |
| NANS      |
| MFSD1     |
| LIMS2     |
| THOC3     |
| TOMM22    |
| EHD2      |
| SFRS2     |
| PDIA3     |
| TXNL4A    |
| EIF4G1    |
| PSMD2     |
| MCFD2     |
| SEC61G    |
| PSMD12    |
| KDELRL1   |
| HNRNPC    |
| C19orf10  |
| HNRNPC    |
| PPIC      |
| PDIA4     |
| ODC1      |
| TPST1     |
| DYNLL2    |
| DDAH1     |
| HSPG2     |
| PDGFC     |
| LOC729580 |

|              |
|--------------|
| HOXC5        |
| unknown      |
| MBL1P1       |
| ZNF367       |
| PARM1        |
| LMNB1        |
| DOCK2        |
| unknown      |
| ASPN         |
| unknown      |
| HIST2H2BE    |
| unknown      |
| ARHGEF4      |
| SMPD3        |
| SCN9A        |
| unknown      |
| CEACAM7      |
| LOC390557    |
| unknown      |
| RP5-1022P6.6 |
| LOC100130967 |
| HGC6.3       |
| unknown      |
| NT5C1B       |
| TRHDE        |
| unknown      |
| LOC401097    |
| OMA1         |
| SOX18        |
| unknown      |
| HTRIF        |
| SPINT1       |
| GPR85        |
| ISPD         |
| unknown      |
| PTPRN2       |
| LOC100128960 |
| ARHGAP19     |
| AMBP         |
| MOGAT2       |
| CCDC108      |
| CYP2F1       |
| IGFL1        |
| SULT1C2      |
| C9orf117     |
| D21S2091E    |
| SERPINA4     |
| DEFB108B     |
| LOC642891    |
| ST8SIA6      |
| LOC402160    |
| ZG16         |
| unknown      |
| unknown      |
| SPTBN5       |
| BMPR1B       |
| CAPN6        |
| ZNF253       |
| CHMP4C       |
| NKX3-1       |
| BLNK         |
| OELSR1       |
| RTKN2        |
| LOC642622    |
| LOC144742    |
| CLEC7A       |
| unknown      |
| PDE1C        |
| STON2        |
| INSL4        |
| SLC22A2      |
| KCNK18       |
| IL12B        |
| LOC84740     |
| LOC197350    |
| C1QL3        |
| KRT2         |
| HPCAL4       |
| RXFP2        |
| LOC283501    |
| MYEOV2       |
| CLIC5        |
| LOC642587    |
| SLC27A2      |
| DEFB115      |
| LUZP2        |
| LY6G6F       |
| LOC285629    |
| NCRNA00159   |
| unknown      |
| C1orf106     |
| LOC441601    |
| LOC730242    |
| KRT6C        |
| DGKB         |
| PRB4         |
| LOC387723    |
| unknown      |
| LOC340074    |
| LOC729426    |
| unknown      |
| unknown      |
| LAD1         |
| unknown      |
| LRRTM4       |
| C7orf69      |
| NPPA         |
| ST8SIA6      |

|              |
|--------------|
| FBXO24       |
| ZIC2         |
| ARHGAP28     |
| TMEM139      |
| MMP27        |
| SLC2A4       |
| SLC2A12      |
| LOC728558    |
| TMEM90A      |
| COX8C        |
| XK           |
| HIGD1C       |
| SCN3B        |
| UGT2B11      |
| C6orf176     |
| FOXP2        |
| OAS1         |
| LOC441493    |
| SLC22A3      |
| NLGN3        |
| LOC100128003 |
| C11orf9      |
| TEPP         |
| ZNF248       |
| ZCCHC18      |
| TEX9         |
| KCNT2        |
| LOC285768    |
| GLT1D1       |
| C5orf36      |
| OCLN         |
| LOC100132625 |
| IRF4         |
| SLC16A12     |
| PPEF1        |
| LOC100192378 |
| TRPM6        |
| unknown      |
| XCL1         |
| KRT37        |
| PRDM13       |
| FILIP1       |
| SFRS13B      |
| unknown      |
| CALCRL       |
| JPH4         |
| RHOXF1       |
| TEKT3        |
| FCGR2A       |
| PAGE2        |
| FLJ36000     |
| SCNN1A       |
| LOC284276    |
| CHGA         |
| unknown      |
| LOC645485    |
| DMGDH        |
| UBL4B        |
| HERC2P4      |
| C15orf62     |
| unknown      |
| unknown      |
| SLC8A3       |
| TTC29        |
| WNT2B        |
| PMCH         |
| BTBD8        |
| PLGLB1       |
| PXT1         |
| ATP2A3       |
| JHDM1D       |
| PDE4D        |
| IL16         |
| FFAR3        |
| FMNL1        |
| NTNG1        |
| FCRL6        |
| NTRK3        |
| ZNF436       |
| KCTD16       |
| unknown      |
| unknown      |
| DDR1         |
| TTC39A       |
| ADAM11       |
| LOC646034    |
| unknown      |
| C6orf170     |
| BTBD19       |
| UNQ2963      |
| C7orf31      |
| ANKRD20A2    |
| LOC100130248 |
| PROC         |
| PCDH9        |
| WDR52        |
| PWWP2A       |
| FAM154A      |
| LMOD1        |
| ZNF192       |
| unknown      |
| A1CF         |
| KCNA10       |
| unknown      |
| C10orf105    |
| PKD2L1       |
| SDK1         |
| CCL16        |

|               |
|---------------|
| PRRT2         |
| C10orf25      |
| LOC100130387  |
| TMEM25        |
| JAK3          |
| C13orf38      |
| TNXB          |
| SNED1         |
| LOC650392     |
| unknown       |
| SHISA2        |
| PRDM12        |
| LSMD1         |
| LOC148987     |
| FMNL1         |
| ANKRD7        |
| WDR66         |
| TEKT2         |
| KLHL13        |
| INTS6         |
| SIRT4         |
| HDDC2         |
| ANKRD29       |
| AGTR1         |
| POM121L1P     |
| MDM4          |
| SULT4A1       |
| LOC100134229  |
| BDH2          |
| TBC1D3G       |
| POM121L9P     |
| EDNRA         |
| TIMP4         |
| IL24          |
| PTGR2         |
| VAV3          |
| CPT1B         |
| ADAM8         |
| GPM6B         |
| KCNMB4        |
| HMHA1         |
| ITPR1         |
| CARD8         |
| STC1          |
| TNXB          |
| C6orf97       |
| NAMPT         |
| NDRG2         |
| LOC387763     |
| CSN1S1        |
| LOC100131102  |
| COL4A5        |
| KIAA1199      |
| LOC389791     |
| unknown       |
| PPFIBP2       |
| unknown       |
| FIGLN2        |
| EDNRA         |
| MAOA          |
| SCAMP5        |
| SLC25A27      |
| COLEC12       |
| ETNK2         |
| unknown       |
| C3            |
| CPE           |
| IL11          |
| RAP1GAP2      |
| LOC149351     |
| SLC29A4       |
| BJRC7         |
| LDHD          |
| DFNB59        |
| LOC284900     |
| KIAA1529      |
| CELSR3        |
| MST1          |
| SERPINA3      |
| GCOM1         |
| AMIGO1        |
| LOC338758     |
| NINL          |
| CFB           |
| GPR56         |
| PTPRU         |
| LOC285084     |
| TNFRSF11B     |
| IL17D         |
| LOC100133142  |
| THRB          |
| TTC25         |
| SLC25A23      |
| P2RX7         |
| MITF          |
| STON1-GTF2A1L |
| RNF112        |
| SEMA4G        |
| TMTG1         |
| C11orf35      |
| ASPRV1        |
| unknown       |
| ROR2          |
| LDB2          |
| MIR155HG      |
| UCN           |
| SLC39A8       |
| KIAA1407      |

|              |
|--------------|
| MRPL37       |
| PICK1        |
| P4HB         |
| ATAD3B       |
| FSTL1        |
| RRBP1        |
| CTPS         |
| COL1A2       |
| HP1BP3       |
| PMM2         |
| SIRPA        |
| NCLN         |
| TPM2         |
| MFSD10       |
| PEA15        |
| SNRPB        |
| TGFB1        |
| BOK          |
| SCARA3       |
| SRM          |
| FSTL3        |
| FAM57A       |
| FHL2         |
| PMF1         |
| C1orf152     |
| ATAD3B       |
| LOC100131482 |
| EHD1         |
| PHB          |
| AMOTL2       |
| CLIC5        |
| FN1          |
| TOMM34       |
| C10orf116    |
| SERF2        |
| NRM          |
| TMEM57       |
| CYB561D2     |
| SRPX2        |
| MRPL54       |
| EIF4E2       |
| TSTA3        |
| TFDP1        |
| PHPT1        |
| TSSC1        |
| SNX8         |
| NUTF2        |
| VKORC1       |
| MAPRE1       |
| TGOLN2       |
| ARPC5L       |
| VPS24        |
| COPG         |
| PMS2L1       |
| PTRH1        |
| ODR2L        |
| ANXA2P1      |
| C11orf17     |
| NOP16        |
| MCM2         |
| BOP1         |
| GLTPD1       |
| ARPC1A       |
| ARHGAP22     |
| unknown      |
| POLD2        |
| IFRD2        |
| ZDHHHC12     |
| PPDPF        |
| LRFN4        |
| OLFML3       |
| CD97         |
| RPN2         |
| PLOD3        |
| PTTG1IP      |
| TXNDC5       |
| KCTD5        |
| TPM3         |
| RNF126       |
| PA2G4        |
| LRRC32       |
| C14orf80     |
| ARL4C        |
| CSE1L        |
| DDT          |
| EIF4E2       |
| CDC23        |
| C20orf29     |
| TOMM40L      |
| ANKRD16      |
| PRKCD        |
| HRAS         |
| C14orf153    |
| BRD9         |
| ARD1A        |
| HNRNPA2B1    |
| CSE1L        |
| ANGPTL4      |
| IDH2         |
| RNF26        |
| HES4         |
| GPSM2        |
| HSP90B3P     |
| unknown      |
| PITRM1       |
| MCM3         |
| CRISPLD2     |
| DPH3B        |

|           |
|-----------|
| CD177     |
| LOC91149  |
| ATCAY     |
| LZTS1     |
| unknown   |
| UPK1B     |
| GH2       |
| C2orf27B  |
| PCDHB15   |
| ZSCAN23   |
| SHROOM2   |
| AMAC1     |
| IL25      |
| LOC402198 |
| GPR37     |
| MYOCD     |
| PGDHA9    |
| KIAA1524  |
| unknown   |
| CDH17     |
| CDX4      |
| TCEB3B    |

|              |
|--------------|
| CYTL1        |
| ZNF750       |
| AMHR2        |
| IL5          |
| unknown      |
| unknown      |
| LOC100133862 |
| CSPG5        |
| LOC100131436 |
| LOC100133599 |
| TRPM3        |
| GRPR         |
| PPP1R1B      |
| SOBP         |
| unknown      |

|              |
|--------------|
| unknown      |
| SNORD116-19  |
| ATHL1        |
| unknown      |
| CAONG7       |
| PTGES        |
| C9orf98      |
| CDCP1        |
| AREG         |
| LASS4        |
| BOHE         |
| TBC1D10C     |
| LOC339192    |
| C7orf46      |
| C13orf16     |
| ALX4         |
| SLC6A15      |
| N4BP2L1      |
| PRSS27       |
| HSPA6        |
| GPRC5B       |
| RTDR1        |
| DMKN         |
| PHC1         |
| CSTA         |
| E2F5         |
| LEAP2        |
| unknown      |
| TC2N         |
| C19orf18     |
| IRX6         |
| TTC12        |
| ZNF815       |
| PLEKHH2      |
| SPRY1        |
| ADAMTS3      |
| PHC1         |
| LOC100132701 |
| LOC100130015 |
| RGSS5        |
| LAMB2L       |
| CCDC146      |
| NRN1L        |
| APLN         |
| SLC24A3      |
| PTGS2        |
| CASC2        |
| TMEM170B     |
| GCOM1        |
| IL1B         |
| LAMA1        |
| C1RL         |
| LCA5L        |
| SPATA17      |
| SHF          |
| NTRK3        |
| DNAL1        |
| EFHD1        |
| GUCA1B       |
| C11orf94     |
| ABLIM1       |
| EPB41L1      |
| ANKH         |
| APOC1        |
| HPCA         |
| NTNG1        |
| ZNF397OS     |
| CLLU1OS      |
| CROCC        |
| C3           |
| unknown      |
| unknown      |
| unknown      |
| LRRC36       |
| LOC441687    |
| C17orf76     |
| TAS1R3       |
| TYSND1       |
| LOC100131000 |
| unknown      |
| unknown      |
| ARHGAP4      |
| PLA2G4A      |
| PRG2         |
| H6PD         |
| C16orf73     |
| unknown      |
| LOC84856     |
| unknown      |
| RASSF4       |
| ASPHD2       |
| LGI4         |
| SYNGR1       |
| WDR69        |
| SLC7A2       |
| SNORA12      |
| GBP1         |
| CDKN1C       |
| GPR4         |
| PHOSPHO2     |
| DMKN         |
| ARMC2        |
| ARHGAP26     |
| LOC728650    |
| unknown      |
| RBM44        |
| C13orf18     |
| PAPLN        |

|           |
|-----------|
| TOR1B     |
| TMEM18    |
| LGMM      |
| ALS2CR4   |
| LZIC      |
| PIGS      |
| TNPO3     |
| PDSS1     |
| TSN       |
| C21orf70  |
| NPTN      |
| unknown   |
| XKR8      |
| NGAPH2    |
| H2AFZ     |
| RNF216L   |
| NP        |
| ZNF536    |
| GLT25D1   |
| ZNF414    |
| SIL1      |
| ZDHHC12   |
| ENG       |
| COPZ1     |
| CEP250    |
| C17orf82  |
| GPER      |
| ISLR      |
| ABHD12    |
| YIF1B     |
| KLHDC4    |
| CNN3      |
| CALM3     |
| METTL1    |
| TNFRSF12A |
| CHMP4A    |
| ANPEP     |
| TYRO3     |
| CCRL1     |
| HYI       |
| HYLS1     |
| SMAGP     |
| RAB35     |
| HCLS1     |
| GPX8      |
| DDX39     |
| PLOD1     |
| CDYL2     |
| ALDH4A1   |
| DPT       |
| PTPN18    |
| C19orf61  |
| INF2      |
| NFKBIL2   |
| GALNS     |
| LIPF2     |
| SDSL      |
| EWSR1     |
| RABEP2    |
| PTPLB     |
| CENPJ     |
| MTFR1     |
| HSPA2     |
| MYCBP     |
| GABBR2    |
| C21orf70  |
| CHAF1B    |
| SEC13     |
| GMNN      |
| CLN6      |
| ACOT9     |
| TMEM173   |
| ZC3HC1    |
| CTHRC1    |
| FJX1      |
| SAR1A     |
| SMG6      |
| FUBP1     |
| PCBP2     |
| CLDN7     |
| F2R       |
| PROCR     |
| FEM1A     |
| NAV3      |
| FN3KRP    |
| COL4A1    |
| KONG1     |
| TIMM22    |
| ATF6      |
| PHKB      |
| RPL23AP7  |
| CXorf38   |
| GATAD2A   |
| TIMM50    |
| LDHA      |
| DUS2L     |
| ACTN4     |
| NPDC1     |
| MED8      |
| SAC3D1    |
| RAN       |
| NGAPH2    |
| unknown   |
| SKI       |
| SH3RF1    |
| SLMO1     |
| AVEN      |
| HIST2H2AB |

|              |              |
|--------------|--------------|
| FAM162B      | POLA1        |
| CDCP1        | ZNF707       |
| WDR33        | YIPF5        |
| GOLGA2L1     | RAB15        |
| CCDC147      | IFI35        |
| OBFC1        | ATP10A       |
| CALML6       | GYS1         |
| SALL2        | PRSS23       |
| MEX3A        | FAM129A      |
| SECTM1       | UBE2F        |
| CNTLN        | BUB3         |
| PTPN3        | STK24        |
| RNF144B      | METTL2A      |
| COL4A4       | ILF3         |
| LOC283711    | C19orf52     |
| SEC31B       | PLA2G15      |
| CUGBP2       | MPDU1        |
| BCL2L11      | HMOX1        |
| SYT7         | CDC25B       |
| AGACB        | CLDN4        |
| C20orf195    | DPYSL3       |
| EFNB3        | TUBA1B       |
| CH25H        | CRELD1       |
| SLOC2A5      | SNX11        |
| TMTC1        | IPPK         |
| AREG         | RSC1A1       |
| MORN3        | FAM107B      |
| UOX          | STK17B       |
| DISC1        | HMG2         |
| PDK4         | SPSB1        |
| BRSK2        | TIPARP       |
| SAMD12       | ENDOD1       |
| ZSWIM5       | MXD3         |
| LOC339742    | IVD          |
| COL14A1      | C20orf196    |
| unknown      | unknown      |
| LOC644990    | APBB2        |
| ANK1         | FAHD1        |
| APBA2        | MAP4         |
| PSORS1C3     | PITRM1       |
| unknown      | NIPAL3       |
| HESX1        | PTS          |
| NEO1         | FBLN5        |
| TMEM151B     | TFPT         |
| C22orf31     | AKAP2        |
| KCNE3        | EIF2C2       |
| HS6ST3       | RGS3         |
| GAS7         | DOCK10       |
| C6orf97      | HIST1H4C     |
| TRANK1       | RCN3         |
| CYorf15B     | TMED7-TICAM2 |
| LOC284998    | MFSD1        |
| CCNB3        | PDSS1        |
| MGC57346     | PIAS2        |
| DBC1         | APITD1       |
| NCKAP1L      | EFS          |
| COLQ         | SUV39H2      |
| BCL11B       | SPCS3        |
| ZNF566       | HPS5         |
| CHST1        | PPAPDC3      |
| LOC285628    | ASNS         |
| TBC1D3B      | ESYT1        |
| LOC100134040 | WWOX         |
| ETNK2        | unknown      |
| SERTAD4      | KCTD5        |
| LOC284080    | HLA-DPA1     |
| MYCBPAP      | ATAD3C       |
| GUCA1B       | COL16A1      |
| TCP10        | PALLD        |
| NANOG        | WDR41        |
| ADAMTS9      | SMARCB1      |
| IGFBP5       | GARS         |
| CCDC69       | SLC35E3      |
| JPH1         | WEE1         |
| SLC25A27     | NAV1         |
| CTTNBP2      | CDGAP        |
| STEAP2       | KRTAP19-5    |
| unknown      | UBL3         |
| OSBP2        | TNFAIP3      |
| FGF11        | C9orf40      |
| LRRK2        | FUBP1        |
| EDA          | OXCT1        |
| GUCY1A3      | AEN          |
| hCG_38984    | LOC100130065 |
| C4orf47      | SNHG7        |
| MITF         | LCLAT1       |
| hCG_1994695  | GTF2H3       |
| CSF3         | CCDC85C      |
| TAF4B        | PTP4A1       |
| EFCAB3       | LOC728975    |
| ATP8B3       | XG           |
| ROBO4        | KITLG        |
| CCDC64       | ITGB1BP1     |
| unknown      | unknown      |
| unknown      | MAP4         |
| ATHL1        | PEG10        |
| unknown      | EPHB2        |
| unknown      | SLC13A4      |
| RHPN2        | LOC100132338 |
| TDRD12       | GDNF         |
| GGT8P        | SLFN12       |
| CHRN2        | SMARCE1      |
| CX3CR1       | C14orf106    |
| LOC440104    | FAM36A       |
| LECT2        | C6orf132     |
| ENTPD3       | C9orf3       |
| LOC100131089 | CENPH        |
| PRSSL1       | ADAMTS5      |



|              |              |
|--------------|--------------|
| IGF2         | PHACTR2      |
| KRTAP21-2    | SLC7A1       |
| TNN3         | DACT1        |
| GABBR1       | SLC17A9      |
| LOC100134361 | STX2         |
| LOC100130015 | ATP6V1H      |
| LOC145783    | unknown      |
| IFT57        | MET          |
| CPXM1        | PAFAH1B1     |
| SHC2         | HSP90B1      |
| LOC728650    | SLC25A38     |
| C1orf203     | ARL6IP1      |
| NPL          | BAG3         |
| NHEDC1       | NGAPD2       |
| LDB2         | DOLPP1       |
| DTNA         | MAP1B        |
| EGFL6        | EZH2         |
| CAMK2B       | UGDH         |
| ANK1         | C1orf212     |
| CACNA1G      | TRIM22       |
| PECAM1       | CALML3       |
| DMKN         | LOC100133638 |
| RNF175       | CAV2         |
| C17orf44     | CAPRIN1      |
| GNMT         | SYNE2        |
| TMEM176A     | LOC375295    |
| ZMYND12      | MECOM        |
| TCN2         | TBC1D19      |
| GARNL3       | ZAK          |
| TPPP3        | ADPRH        |
| FAM49A       | TARDBP       |
| CYP19A1      | LMNB2        |
| FLYWCH1      | LOC100129324 |
| SNCA         | unknown      |
| JAM2         | DCK          |
| GALNTL1      | unknown      |
| MYH7B        | CXCL12       |
| LIF          | TMEM59L      |
| CD72         | PRMT7        |
| IGFBP2       | TMEM87A      |
| unknown      | LOC100131490 |
| RGS16        | ARHGAP23     |
| FAM20A       | LOC442308    |
| RALGPS1      | PER3         |
| COL9A3       | TM7SF3       |
| GRK4         | C5orf42      |
| CES1         | ZNF714       |
| INHBB        | RANBP3       |
| EFCAB1       | CKAP4        |
| GDF1         | unknown      |
| CECR4        | ERAP1        |
| CLDN23       | NIN          |
| LAMA5        | NGAPD3       |
| RASGRP2      | BAIAP2L1     |
| SLC45A1      | unknown      |
| SH3TC1       | LRR057       |
| FAM84A       | VANGL1       |
| DNAH7        | HNRNPH3      |
| C1orf129     | MGP          |
| SLC6A15      | MRT04        |
| CCR7         | unknown      |
| unknown      | HMG2         |
| ATPGD1       | ROCK2        |
| AMY1C        | SEC61A2      |
| CACNA2D4     | MAB21L1      |
| RAPGEFL1     | PLBD1        |
| GOOM1        | ALS2         |
| KLF8         | LEF1         |
| MGC12982     | CUBN         |
| AMY1C        | unknown      |
| STAT4        | unknown      |
| C19orf57     | MCM7         |
| PTPRU        | C17orf72     |
| C17orf69     | LOC100128163 |
| SPON1        | LOC648987    |
| DDX26B       | SLC12A8      |
| NTRK3        | unknown      |
| GCH1         | unknown      |
| LOC339524    | CERCAM       |
| FAM171B      | POLE         |
| AKD1         | APOBEC3F     |
| TTC18        | LGALS9C      |
| PECAM1       | FAM125B      |
| CCL3         | HIST1H2AD    |
| LOC100127998 | DNAH14       |
| NFIB         | MCART1       |
| HGF          | LOC400987    |
| GBP2         | SMC2         |
| PDGFRL       | USP10        |
| unknown      | USP13        |
| LRRN4CL      | TEF          |
| OLFML2A      | LYSMD2       |
| ZFP2         | ZNF516       |
| DIO2         | C7orf49      |
| ALB          | MRRL48       |
| ZNF397       | LOC284441    |
| VWA5A        | C13orf37     |
| unknown      | NAP1L5       |
| NR4A2        | BCAR3        |
| unknown      | C1D          |
| PEBP4        | unknown      |
| MGC5566      | LIN9         |
| RGS9BP       | TDP1         |
| LOC388588    | TEX261       |
| RASGRP2      | DSN1         |
| EFHC1        | FAM176A      |
| C1orf228     | THOC4        |
| CCND2        | LUM          |

|              |              |
|--------------|--------------|
| SLC6A15      | PAFAH1B2     |
| unknown      | THEM4        |
| ATP2A3       | ZNF544       |
| C2orf84      | MAPK6        |
| FAM43B       | BCL7A        |
| LVRN         | TOP11L1      |
| CLIC2        | PVRL2        |
| unknown      | CDC99        |
| RNF157       | PMEP1        |
| RSP04        | CEP152       |
| LCP1         | C1orf55      |
| ADRBK2       | TNRC6C       |
| DTX4         | SRRT         |
| SEPT4        | unknown      |
| C20orf132    | ZBTB3        |
| OVOS2        | CDC99        |
| PPARGC1A     | TMEM167A     |
| GAL3ST1      | SRR          |
| NCRNA00171   | ANTXR2       |
| TSHZ2        | WHSC1        |
| PLD1         | COPS8        |
| GPR84        | RUNX1        |
| FLJ42289     | SEPT6        |
| EFHD1        | PXDN         |
| OGDHL        | PLOD2        |
| EMID1        | LOC100132805 |
| PNMA6A       | KIF5B        |
| FAM90A1      | ORC5L        |
| RGS16        | SUSD2        |
| NTN5         | SURF4        |
| NFIB         | unknown      |
| C10orf58     | MTHFD1       |
| C2           | MCAM         |
| AUTS2        | ATF3         |
| FBXO2        | C1orf59      |
| C8ORFK29     | MAVS         |
| CLMN         | COP22        |
| ERV3         | SEPT2        |
| PTH1R        | HMGB2        |
| ELOVL3       | PRAGMIN      |
| ABCA7        | FANGG        |
| CDKN2B       | POP1         |
| ZP3          | CDC42        |
| EPS8L1       | FOXD1        |
| FAM184A      | C19orf42     |
| BCL2A1       | SEC14L1      |
| RGS9         | SH3BP4       |
| GRTF1        | C1orf144     |
| TNFRSF18     | unknown      |
| FAM90A7      | TRAK1        |
| DYNLRB2      | unknown      |
| RBM44        | PPP2R1B      |
| JAM2         | CHAF1A       |
| NDP          | TGFBI        |
| AGT          | UHRF1BP1L    |
| NANOS1       | GSG1         |
| EREG         | SEMA3C       |
| CSGALNACT1   | EXOSC2       |
| ZBTB46       | USP18        |
| PDE9A        | SAMD9L       |
| OLAH         | ZNF185       |
| MCTP1        | KIAA0586     |
| NOVA1        | GANC         |
| C14orf81     | VRK1         |
| unknown      | GDPD5        |
| LEMD1        | CRLF3        |
| AP3B2        | SIAE         |
| SLITRK4      | LOC150759    |
| C17orf69     | NT5DC3       |
| CLEC14A      | HAUS2        |
| RAB37        | SLC35E3      |
| FLJ39582     | LY86         |
| B4GALNT4     | ANKRD13A     |
| CHI3L1       | OSBPL3       |
| SHC3         | OPA3         |
| TLE6         | ADI1         |
| RND2         | TTF2         |
| unknown      | APCDD1L      |
| PLEKHA6      | GRAMD3       |
| CLDN5        | DONSON       |
| CDH12        | C10orf32     |
| unknown      | NNT          |
| LOC100271715 | DR1          |
| hCG_2038428  | LRRCS9       |
| unknown      | PXDN         |
| unknown      | unknown      |
| unknown      | C9orf5       |
| unknown      | NR5A2        |
| NKPD1        | unknown      |
| LOC100131869 | SLC16A2      |
| TFAP4        | LOC727847    |
| PTPN22       | EGR2         |
| KCNAB3       | C12orf49     |
| VNN1         | NET1         |
| MOSPD2       | C3orf33      |
| TACSTD2      | C1orf96      |
| GPM6B        | IPO5         |
| PRKY         | SNHG3        |
| NLRP3        | LIMK2        |
| KIAA0368     | P4HA2        |
| CLIC6        | CALU         |
| GPR155       | DNAJC9       |
| C3orf63      | KDELR2       |
| CLDN22       | DTYMK        |
| C10orf67     | RECK         |
| NCRNA00087   | NRAS         |
| ZDHHC14      | MXRA7        |
| ANXA11       | CPPED1       |

|              |              |
|--------------|--------------|
| AMT          | RFC2         |
| NUDT7        | CDK6         |
| IGSF22       | THY1         |
| ZNF177       | FBLN7        |
| LEPR         | C9orf86      |
| SORD         | TMEM171      |
| TET2         | LPGAT1       |
| SLC2A9       | MSTO1        |
| RGS5         | GPER         |
| SPATA6       | POFUT2       |
| PDE4D        | PPP1R15A     |
| CBR4         | ARD1B        |
| NHS          | SEPW1        |
| PHYHD1       | ASB1         |
| CBLN3        | SNX9         |
| ZNF248       | IFI30        |
| KIAA1147     | SOB5         |
| CCK          | unknown      |
| SEPP1        | MRPS11       |
| FLJ33630     | PGAM1        |
| unknown      | C1orf152     |
| SLC4A5       | MRPL37       |
| ZNF214       | PFN1         |
| C1orf25      | LYRM2        |
| PTGFRN       | HSBP1L1      |
| unknown      | CIDECP       |
| AHI1         | NR1D1        |
| PAN2         | CLCC1        |
| C3orf67      | PDXK         |
| LOC286367    | C22orf25     |
| CLEC4A       | GAS2L1       |
| MANEAL       | SARS2        |
| FAM134B      | TUBB2A       |
| ADHFE1       | HYAL3        |
| DEFB131      | GLTPD1       |
| LAMA1        | HNRNPA2B1    |
| STEAP2       | TRIOBP       |
| VAPA         | NCRNA00181   |
| C10orf10     | PLAUR        |
| PYGO1        | CLPB         |
| FAM188B      | YWHAZ        |
| BRWD3        | DDA1         |
| APOL3        | PTTG1IP      |
| KIAA1107     | PRKCDBP      |
| THNSL1       | PDIA6        |
| unknown      | ARD1A        |
| COX15        | RHOC         |
| LOC349114    | PSMG3        |
| CEP68        | MARCKSL1     |
| MAPKSP1      | LOC729991    |
| PCSK4        | RABEP2       |
| GK           | BAK1         |
| ABCC6        | DPYSL4       |
| C1orf101     | ADI1         |
| FER1L4       | PRRG1        |
| C22orf41     | ARHGDI1A     |
| LOC100132077 | EHD4         |
| AGP7P3       | AKAP7        |
| TMEM38A      | EIF4EBP1     |
| RPGRIPL1     | SFRS2        |
| GPRC5C       | WRAP53       |
| OSCAR        | TMEM191A     |
| LOC286254    | BGN          |
| RAG1         | SLAMF9       |
| WDR74        | BCAS4        |
| MMP9         | FICD         |
| unknown      | CHTF18       |
| ARMGX4       | METTL1       |
| PLA2R1       | NME6         |
| TPTE         | TUBB         |
| CYYR1        | PACSIN2      |
| ATM          | PEA15        |
| NETO1        | FKRP         |
| FLJ25006     | hCG_2014417  |
| unknown      | ATL1         |
| TRIM66       | GSST2        |
| unknown      | PLEKHB2      |
| LOC157562    | C9orf114     |
| FAM65B       | FAM107B      |
| MGC21881     | MFSO7        |
| ARHGAP20     | C7orf50      |
| NUDCD1       | GPN2         |
| CALB2        | ASL          |
| unknown      | LOC128322    |
| LOC100129196 | NPTN         |
| CCDC7        | CALM3        |
| LOC389765    | GLIPR2       |
| GUCY1B3      | SMTN         |
| DOCK4        | EMP3         |
| LOC100130840 | HM13         |
| SF1          | CSTF3        |
| AMOT         | IGFBP6       |
| LOC389834    | LOC100144603 |
| LOC100131564 | UFSP1        |
| SV2A         | DNAJC30      |
| unknown      | MICA         |
| RPL32P3      | PRPS1        |
| FAIM2        | PRIL5        |
| FILIP1       | GSST2B       |
| CCDC122      | PLAC9        |
| unknown      | CSGALNACT2   |
| IL17RD       | SLC6A3       |
| SYN2         | HSF1         |
| ZNF599       | TMEM164      |
| HES7         | HN1L         |
| LOC100132891 | CDK10        |
| ZNF638       | unknown      |
| GLI1         | PTPRK        |

|              |           |
|--------------|-----------|
| unknown      | NXNL2     |
| ZNF577       | unknown   |
| SLC6A16      | unknown   |
| C2orf63      | PGAM5     |
| ZC3H6        | IQCE      |
| FAM135A      | SUV39H1   |
| TRAF1        | LYL1      |
| MCTS1        | SH3BP4    |
| unknown      | KHSRP     |
| CREB1        | BLOC1S3   |
| CDNF         | NRL       |
| IGDCC4       | ABHD11    |
| LOC100287820 | BGLAP     |
| GK           | RCC1      |
| KIAA1147     | RGM2      |
| C5orf41      | FAM176A   |
| DHFR1L1      | NRIP3     |
| LOC220930    | PRH2      |
| GPX3         | ACOT7     |
| unknown      | RRAD      |
| unknown      | GPSM1     |
| CNKSR1       | unknown   |
| KIAA1009     | C5orf33   |
| LOC100128905 | USP12     |
| IL34         | ERLIN2    |
| C9orf123     | BATF      |
| NKX6-3       | LACE1     |
| SCNN1D       | UBXN8     |
| PCDHB14      | SRRT      |
| CKMT1A       | ITGA5     |
| PNPLA7       | AMACR     |
| LOC283387    | SMUG1     |
| STARD6       | TGM2      |
| unknown      | ZNF575    |
| PHF21A       | MPZL1     |
| PLXDC2       | GPC1      |
| BCO2         | KIF13A    |
| CAACNA1H     | SYS1      |
| CYFIP2       | MRPL45    |
| BDNFOS       | KIAA0090  |
| KATNAL2      | BNIP1     |
| unknown      | TMEM191A  |
| CD70         | ATRIP     |
| HSPA6        | FARP2     |
| unknown      | SUSD5     |
| TOEANC       | MCM7      |
| IL1R2        | TUBA1C    |
| LOC100133598 | NRAS      |
| ITGB8        | IVL       |
| ZNF154       | TUBA1A    |
| LOC90834     | UFSP1     |
| hCG_1986447  | PCYT2     |
| LOC646719    | UBE2NL    |
| C5orf50      | F10       |
| unknown      | TRPV2     |
| LOC100289922 | PCYT2     |
| OAS2         | PRMT2     |
| CDC2L5       | AFMID     |
| unknown      | PSMD5     |
| unknown      | PIK3IP1   |
| PCDHB9       | CKS1B     |
| ANKDD1A      | SLC25A4   |
| PSPC1        | DHDDS     |
| S100A14      | NGAPD2    |
| LOC145814    | ADSL      |
| F11R         | HIST1H1C  |
| ACTR3C       | BTBD7     |
| SEC1         | RNA5H2A   |
| IGSF3        | TRNP1     |
| MXI1         | MYL9      |
| C14orf167    | TTG7A     |
| LOC349196    | TOE1      |
| AHI1         | SFRS3     |
| PLEKHH2      | PRIM1     |
| FAM63A       | TIMM8A    |
| PROS1        | TCTA      |
| ANKRD10      | PRRC1     |
| KCNRG        | unknown   |
| PLEKHG4      | ERLIN1    |
| ZNF439       | HIST1H4K  |
| unknown      | LMCD1     |
| TM7SF2       | CERCAM    |
| NUDT9P1      | MIOS      |
| RNF144A      | P4HA3     |
| MBTD1        | LIMS3     |
| MIA3         | PARVB     |
| RGS17        | NAGK      |
| C3orf34      | SLC1A5    |
| SATB1        | CAV2      |
| TRPM3        | HIST1H4J  |
| unknown      | WDR34     |
| C1orf113     | HY1       |
| SETD6        | SH3BP5L   |
| TNFAIP8      | CNN1      |
| LOC100133331 | unknown   |
| LRRC70       | HEYL      |
| unknown      | AHR       |
| C5orf53      | TXNRD1    |
| MTMR3        | C10orf137 |
| PHF10        | CREB3L2   |
| unknown      | ABLIM3    |
| KPNA5        | ABCA1     |
| ZNF547       | SAMD4A    |
| FAM110B      | POLR3H    |
| NLRP3        | FAM158A   |
| PARP14       | LETM1     |
| KIAA0485     | ODR2L     |
| KRTCAP3      | HIST1H2BL |

|              |           |
|--------------|-----------|
| unknown      | TRMT5     |
| PCBP3        | PLCB2     |
| C16orf55     | IPO11     |
| LOC389634    | VSIG10    |
| IL1RN        | HIST1H1E  |
| FBXL14       | SCHIP1    |
| RCSD1        | HIST1H4E  |
| SCAPER       | APOBEC3F  |
| SUSD3        | HSD17B1   |
| PIBF1        | MTMR10    |
| ADAMTSL4     | ABL2      |
| NBR2         | CBX5      |
| TCP10L       | HIC1      |
| LOC842340    | GPFR      |
| CISH         | HYAL3     |
| RICS         | GATS      |
| BBS1         | USP36     |
| LOC389834    | CRLF1     |
| PANX2        | SMPD1     |
| SH3BGRL2     | TUBB      |
| FGF7         | CHSY3     |
| LOC730202    | KIAA1609  |
| SH3GL3       | DOT1L     |
| BBS9         | EZR       |
| COL11A2      | CEP72     |
| ACVR1C       | CLIC3     |
| LYST         | HAUS8     |
| GOLGA8A      | WWTR1     |
| STAT3        | SORT1     |
| NOD1         | GIT2      |
| BPTF         | unknown   |
| ATG4C        | SFRS7     |
| FAM8A1       | PSMD9     |
| ZNF181       | TIMP3     |
| C14orf49     | ERI2      |
| TCF7L1       | MAP6D1    |
| LOC100131727 | GSPT1     |
| FBXL17       | TUBB      |
| PREPL        | HSPB2     |
| ASB9         | MAGOHB    |
| LOC284900    | unknown   |
| ARHGAP29     | RGS12     |
| ETV1         | MAP1A     |
| GOLGA6L6     | MPRIP     |
| GK5          | DNASE1L1  |
| LOC441461    | INF2      |
| SENP6        | SMO       |
| TRGV7        | TRPV4     |
| LOC100128398 | unknown   |
| POU2F1       | RIN3      |
| FAM60A       | DPP9      |
| ANKRD12      | ATP13A2   |
| RNF214       | APOBEC3C  |
| CDC14B       | DOCK2     |
| RNF215       | ARHGEF4   |
| ACPP         | FARP1     |
| FLJ39639     | unknown   |
| TRIM38       | FLJ31715  |
| POLB         | EXOSC2    |
| OR7E13P      | unknown   |
| PAQR3        | PGBD3     |
| MMAA         | TCEB3     |
| VPREB3       | KIF1B     |
| HGN3         | VEGFC     |
| SALL4        | WDR77     |
| DENR         | NFASC     |
| SNX32        | OR7E104P  |
| FLJ35390     | SFT2D2    |
| CD19         | LTBP2     |
| ZCWPW2       | POLR2D    |
| LOC100130175 | NRF1      |
| ZNF547       | PODNL1    |
| CHD7         | PRH2      |
| TMEM133      | ATP1B1    |
| PF4V1        | B3GALNT1  |
| ERP44        | unknown   |
| TRIB2        | PHACTR2   |
| CG012        | EIF5A     |
| DDX58        | C13orf15  |
| RNF208       | HS3ST2    |
| LOC100128567 | HMGN2     |
| BCL11A       | HDHD1A    |
| C18orf18     | RRM1      |
| FBXO44       | HERC4     |
| unknown      | EN1       |
| HDAC4        | RCL1      |
| HRASLS       | NAT13     |
| LOC344065    | FUT11     |
| LIPC         | LOC729799 |
| CNOT4        | BPGM      |
| LOC729603    | LOC845676 |
| LOC202781    | SYNC      |
| DPY19L4      | MAX       |
| ABCC6        | SPRN      |
| IPW          | API5      |
| MAGI2        | NUP50     |
| CG030        | unknown   |
| TTTC33       | ATM       |
| CTNND2       | HIST1H1D  |
| C17orf67     | SH2D4A    |
| CLEC2D       | PTPLA     |
| FGR          | MINPP1    |
| LOC100131355 | HSPG2     |
| unknown      | CLEC3B    |
| ZNF630       | CDH2      |
| TMEM71       | NRL       |
| ICOSLG       | DGKI      |
| FLJ35220     | TUBB2A    |

|              |              |
|--------------|--------------|
| ECSOR        | MYO19        |
| APOC4        | TPM1         |
| GALNT9       | RANBP1       |
| CNOT4        | HIST1H4L     |
| PNKD         | C15orf23     |
| COX11        | KIF3C        |
| unknown      | LOC401127    |
| PIKFYVE      | GMPPB        |
| unknown      | KANK1        |
| HNF1A        | TMBIM6       |
| SH2D6        | SLC35A3      |
| DPYD         | EYA3         |
| SLC26A5      | C9orf30      |
| C1orf95      | ARPC4        |
| VWA5A        | RAGE         |
| ZCCHC18      | ACTA2        |
| BMP7         | FLCN         |
| unknown      | TUBB2C       |
| POM121L8P    | CCNO         |
| VPS13D       | ATRIP        |
| MTHFD2L      | PCDHGB4      |
| QKI          | PMEPA1       |
| UBQLN1       | ESPL1        |
| ARVCF        | SGK1         |
| LRRC28       | GREM2        |
| CCR1         | BDKRB1       |
| NPR1         | LAMP2        |
| unknown      | CYTSB        |
| LOC648556    | BMP6         |
| RPGR         | C12orf75     |
| LOC100130141 | INHBA        |
| UTS2D        | LOC100132774 |
| VPS13A       | C10orf47     |
| CNTLN        | CSMD2        |
| SULT1A2      | KLHL35       |
| CCDC66       | SART1        |
| SYCP2        | FCHSD2       |
| ZFX4         | DTX3         |
| RSP03        | SETD8        |
| HNRPLL       | LOC100131746 |
| C3orf35      | SEC61A2      |
| PNPLA4       | unknown      |
| CYP2J2       | MN1          |
| ABCG4        | FAM180A      |
| unknown      | DNAJC5       |
| YBX2         | LIMS2        |
| C14orf26     | KONMA1       |
| USP28        | LOC100132832 |
| NUAK1        | MICALCL      |
| GALNT3       | SLC9A7       |
| C1S          | CCDC18       |
| HR           | MURC         |
| LOC729970    | CDCA4        |
| SPATA6       | SURF6        |
| ATG7         | unknown      |
| IFITM1       | unknown      |
| TNFRSF21     | unknown      |
| SGEF         | FANCA        |
| NSUN6        | ZNF703       |
| CD14         | CHN1         |
| STMN3        | ENSA         |
| TNFAIP6      | TBC1D1       |
| unknown      | ENPP4        |
| IQCD         | COL13A1      |
| BAI2         | LOC143188    |
| MYO23        | PLK2         |
| HIF3A        | ROD1         |
| SEPT8        | CCL25        |
| unknown      | BTN3A1       |
| TSSK3        | DNAL1        |
| HSD11B1      | RAD18        |
| CLGN         | C21orf7      |
| C17orf107    | INPP5F       |
| DBT          | AGPAT9       |
| BEX2         | MTHFD1L      |
| unknown      | PMS2L2       |
| GADD45G      | NACC2        |
| ABCA6        | SYNCRIP      |
| ANKH         | PXMP2        |
| ARSG         | unknown      |
| TMEM71       | unknown      |
| CBX2         | HNRPDL       |
| MCTP1        | TXNDC11      |
| A2M          | unknown      |
| ACSS1        | LIMK2        |
| CUGBP2       | unknown      |
| PLAC8L1      | NKX6-1       |
| ZDHC11       | LOXL2        |
| LOC728534    | PVR          |
| unknown      | LAMC2        |
| IGF2         | HBEGF        |
| FLJ39534     | PURB         |
| VGF          | unknown      |
| DDIT4L       | unknown      |
| PAQR6        | B3GNT8       |
| GSDMB        | unknown      |
| PPP1R1C      | FGFR1OP      |
| RPS6KA1      | DSP          |
| HSPC159      | EPHB1        |
| C11orf70     | C1orf96      |
| FLJ45244     | CBLN2        |
| RPA1         | TRPC4        |
| unknown      | MASTL        |
| GLT8D4       | ABTB2        |
| LPHN2        | GSG1         |
| CMTM1        | unknown      |
| MBD5         | SLC41A2      |
| MAP3K8       | CKS2         |

|              |              |
|--------------|--------------|
| MYO1D        | MICALL1      |
| SEPP1        | C15orf38     |
| HSF4         | C4orf46      |
| CCDC152      | SRCRB4D      |
| PION         | ZWILCH       |
| RUND3A       | C12orf48     |
| SLC26A1      | FAT1         |
| FAM122C      | HMGB3        |
| APOE         | RECQL4       |
| AMPH         | DUSP22       |
| TPCN1        | PEX26        |
| PLA2G4C      | LOC100128851 |
| PEAR1        | LOC100126784 |
| HEXDC        | unknown      |
| MME          | CMKLR1       |
| BFSP1        | ANKRD36B     |
| OVGP1        | NTM          |
| TMEM116      | PVR          |
| SCARNA2      | NOX4         |
| hCG_1990547  | ATXN10       |
| DCHS1        | SLC25A30     |
| RHPN2        | SUSD1        |
| FBXO15       | C16orf62     |
| BDKRB2       | MYLK         |
| DPP4         | CTSC         |
| VASH1        | C12orf45     |
| ANKMY1       | PLA2G16      |
| LOC100129387 | PKIA         |
| BATF3        | CCDC109B     |
| ZDHC11       | ADAMTSL1     |
| CYP2D6       | NPTX2        |
| CD163L1      | OSBPL3       |
| TNFSF13      | HIST1H4K     |
| unknown      | WSB2         |
| C1R          | PMAIP1       |
| WISP2        | SRGN         |
| IFITM1       | PCNA         |
| KIFC2        | LOC645676    |
| C1QTNF1      | RHEBL1       |
| ASAP3        | MCM4         |
| TMEM198      | MYLK         |
| ZDHC1        | STMN1        |
| LRCH2        | TBC1D25      |
| TBC1D8       | KCNK6        |
| FAM183B      | MGP          |
| C1orf203     | SHROOM3      |
| AMT          | CLIC4        |
| GPR162       | CAV1         |
| FUT6         | KANK1        |
| C14orf45     | F3           |
| ADAM33       | SKAP2        |
| MME          | PCNA         |
| CRABP2       | EWSR1        |
| unknown      | RANBP17      |
| ETV1         | PBRM1        |
| unknown      | ZNF174       |
| ADAM33       | MYO10        |
| CCL2         | ATAD2        |
| RFX2         | SLC7A6OS     |
| LOC729680    | JPH2         |
| TRIM46       | RASAL1       |
| GOLSYN       | MDF1         |
| SCARNA17     | HS1BP3       |
| PLEKHG4      | RRP7A        |
| SPEF1        | STRN         |
| SH2B2        | YTHDF1       |
| ZDHC14       | CORO1A       |
| CACNA2D2     | RFT1         |
| ACSS3        | ABL1         |
| C10orf90     | HIST1H2BB    |
| CES1         | LOC100128372 |
| SEMA3F       | CST6         |
| SLC13A3      | LOC729687    |
| ZNF521       | unknown      |
| C5orf4       | SLC38A10     |
| ZNF783       | MCM5         |
| WDR78        | SLC46A3      |
| TPCN1        | RREB1        |
| DENND2D      | CCDC159      |
| unknown      | ARSD         |
| PTGFR        | LOC100128994 |
| NT5M         | unknown      |
| PID1         | HIST1H4D     |
| MAFB         | MEGF6        |
| STAC3        | CRYBB2       |
| REM2         | HIST1H2BM    |
| DHRS13       | SYTL3        |
| OPT1C        | HIST1H2BI    |
| PCBP3        | POLA2        |
| CXCR7        | TRAIIP       |
| TTC12        | SCARA3       |
| PARP9        | CENPP        |
| C8orf42      | ATF3         |
| UNC13D       | C17orf53     |
| NCOA7        | SDC3         |
| GALNTL2      | PPP4R1L      |
| ACSF2        | PXMP4        |
| TMTC4        | AFMID        |
| ALX1         | NF2          |
| LOC729013    | ARHGAP23     |
| PPHLN1       | LMO7         |
| GJD3         | SLC9A7       |
| NR4A3        | LOC100128737 |
| KIAA1683     | FNDC3B       |
| OLFM2        | ECT2         |
| C10orf107    | LOC100128517 |
| PRR5-ARHGAP8 | PTHLH        |
| LOC100270804 | C4orf39      |

|                 |               |
|-----------------|---------------|
| RHOU            | unknown       |
| FOXO1           | LOC100130131  |
| unknown         | CYHR1         |
| C2orf27A        | CGREF1        |
| OR13A1          | CHAC1         |
| HNMT            | CHAF1A        |
| CREB3L4         | MPRIP         |
| ROPN1L          | ING5          |
| RAVER2          | MFGE8         |
| TRIM13          | LOC100133190  |
| BET1            | LIG1          |
| NOTCH2NL        | PHGDH         |
| DDIT4L          | FIBCD1        |
| GJD3            | MAP1B         |
| GLDN            | unknown       |
| PLCL2           | MARCH3        |
| KIAA1324L       | C9orf9        |
| DPYD            | FAM113B       |
| DNER            | C16orf59      |
| unknown         | SAMD4A        |
| SLC7A7          | HIST1H2BH     |
| C7orf53         | LOC100130938  |
| ORMDL1          | ARSB          |
| RPS6KA1         | HIST1H2BO     |
| MTMR9L          | unknown       |
| RAI2            | IL27          |
| GPR177          | RP11-631M21.2 |
| ARAP3           | MCM5          |
| CHST15          | PCYT1A        |
| NGEF            | RAB38         |
| hCG_2022304     | ATXN1         |
| IMPA2           | PRB4          |
| MAP3K5          | HLA-DPA1      |
| WNT3            | FANCI         |
| ACBD4           | CNPY3         |
| ETV1            | MX1           |
| ZNF169          | CRKRS         |
| C13orf31        | LRRC8C        |
| SAP30L          | SLIT2         |
| CD302           | HIST2H2AA4    |
| LOC100129110    | LOC400236     |
| MDGA1           | PHF19         |
| SLC25A23        | OAZ3          |
| ID4             | RFC3          |
| TAS2R10         | unknown       |
| HDAC2           | MTHFS         |
| IQCG            | MYOF          |
| ICAM5           | unknown       |
| ZDHC11B         | LY8K          |
| LOC100129534    | NEK6          |
| RICS            | TPM1          |
| LAMA3           | APOOL         |
| AOC3            | FAM174B       |
| ZCWPW1          | SNORA62       |
| HLA-F           | TMEM150B      |
| LOC158402       | CANT1         |
| TMEM31          | PLCXD1        |
| ARVCF           | FEN1          |
| PLEKHA5         | TRMT2B        |
| PSD             | TOP11L1       |
| PNMA5           | ENC1          |
| WWOX            | ADRA1B        |
| ATP6V1G2        | EXOSC6        |
| unknown         | COL5A1        |
| CTRC            | PENK          |
| ROBO3           | FLNC          |
| TLE6            | ADRA2C        |
| DENND4A         | TP53I3        |
| PPP1R3E         | CHAC2         |
| unknown         | ARNTL2        |
| LOC100128009    | C16orf75      |
| PARG            | SEC14L2       |
| FABP3           | CDK2          |
| TNNG1           | HIST1H1A      |
| SNORA53         | SKP2          |
| ASPHD2          | CD3EAP        |
| LOC257396       | HIST1H2BK     |
| unknown         | WIPF1         |
| C1R             | CAMK1         |
| MGC21881        | LAMC2         |
| MAN2B1          | HAS1          |
| AQP3            | UBE2S         |
| PEL12           | ODF2          |
| MYO1F           | PODXL         |
| SLC44A1         | unknown       |
| CREB3L4         | ZNF655        |
| SH3BGR          | BAMBI         |
| LRRC20          | ARHGAP19      |
| C21orf2         | KIAA1462      |
| HSD17B8         | LOX           |
| GPR39           | C20orf134     |
| WDR19           | P4HA2         |
| LOC729421       | EIF2G3        |
| ANKHD1-EIF4EBP3 | VMAC          |
| NPHP1           | unknown       |
| GRASP           | KPNA2         |
| DLG3            | ING3          |
| HSD11B1L        | ARSA          |
| unknown         | UCK2          |
| KIAA1908        | TPM1          |
| PCNXL2          | TMEM51        |
| C2orf86         | CHEK1         |
| PCSK5           | UBFD1         |
| SERPINF1        | RFC3          |
| CPT1C           | CLIC4         |
| unknown         | PRPS1L1       |
| FAM26F          | CAV1          |
| SSH3            | HN1           |



|               |              |
|---------------|--------------|
| F11R          | GATA2        |
| PPP1R3F       | PPAPDC1A     |
| unknown       | PSRC1        |
| SGEF          | ADAMTS1      |
| BAI2          | STAG3        |
| DHRS12        | LOC441795    |
| S100P         | GPR68        |
| MXI1          | unknown      |
| C11orf65      | HOMER2       |
| LQK1          | HIST2H4B     |
| ANKRD13B      | C9orf100     |
| BTAF1         | unknown      |
| SPAG16        | PDDC1        |
| DTX3L         | SULF2        |
| unknown       | LOC100128913 |
| JMJD7-PLA2G4B | unknown      |
| DNM3          | BGLAP        |
| RNF145        | GPAT2        |
| CLEC2B        | unknown      |
| DEAF1         | DES          |
| FBLN1         | unknown      |
| PLXNB1        | CD83         |
| OPLAH         | HN1L         |
| RNU2-2        | LCE2A        |
| DDR1          | DNAJC27      |
| CAPS          | ITGBL1       |
| SDCBP2        | CARD9        |
| JUNB          | IKBIP        |
| C3orf17       | LOC389842    |
| NPAS2         | SACS         |
| NCKIPSD       | SLC7A5       |
| ITGA7         | ITFG2        |
| ANGPTL2       | HIST1H4I     |
| EBF1          | HAUS8        |
| CFD           | GLI1P2       |
| SLC27A3       | WDR4         |
| SOD2          | KDR          |
| C22orf46      | FPR1         |
| SMOC1         | NOL9         |
| SULT1A4       | KIAA0090     |
| REEP2         | GGCX         |
| RAC3          | RUNX1        |
| TLE2          | COL12A1      |
| C9orf116      | ARHGAP23     |
| MORN4         | BARD1        |
| DOCK6         | CFLAR        |
| LMTK3         | COL1A1       |
| HSD17B7       | SERPINE1     |
| CLYBL         | DGCR11       |
| ACTR3B        | FGF5         |
| unknown       | unknown      |
| SHOX2         | GAL          |
| SFRP2         | DSP          |
| MAP3K12       | TUBGCP3      |
| NUD18         | C13orf34     |
| STXBP4        | C5orf13      |
| ZNF692        | FAM167A      |
| PHYHIP        | ACOT11       |
| FLJ46906      | ADAMTSL1     |
| NR1H3         | C4orf12      |
| unknown       | FBN2         |
| GSTA4         | ICAM2        |
| ARHGEF19      | PCOLCE2      |
| C5orf38       | TSPAN13      |
| FOSL2         | CTSC         |
| F8            | CKS1B        |
| NCKIPSD       | TMEM167B     |
| SLC22A18      | FKBP11       |
| LOC283575     | FKBP11       |
| ACOX1         | FCRLB        |
| ADC           | CHADL        |
| LRSAM1        | THBS1        |
| IL1RN         | CSPG4        |
| IGLL1         | PCGF5        |
| EPS8L1        | TP53I3       |
| C14orf45      | SDC1         |
| MMP19         | SEC14L2      |
| GRIN3B        | ANAPC1       |
| SCARNA12      | CNST         |
| H2BFM         | BOLA3        |
| CBX7          | MECOM        |
| NFYA          | FRY          |
| NAPEPLD       | GNG2         |
| ISG20         | LOC285300    |
| SEMA3B        | C10orf12     |
| USP53         | NOTCH1       |
| LAMA4         | TBX3         |
| GJC2          | HIST1H4B     |
| LOC440104     | SASS6        |
| JHDM1D        | CPS1         |
| DMTF1         | SUV420H1     |
| RPGR          | HIST1H2AE    |
| CYCS          | unknown      |
| ASTN2         | ZNF823       |
| TUFT1         | SIGLEC16     |
| IL33          | PDAP1        |
| ADAMTSL4      | MICAL3       |
| NRCAM         | C6orf150     |
| CYP7B1        | SP2          |
| unknown       | LOC100134259 |
| ADAMTSL4      | AQP8         |
| PPP1R3G       | ULK2         |
| CDKN2A        | DBF4         |
| TTLL3         | DHFR         |
| PPM1J         | SF3B4        |
| NPW           | BCCIP        |
| LOC100128881  | DEPDC6       |
| ARHGEF3       | GALNT5       |

|              |              |
|--------------|--------------|
| FBXO44       | CHST3        |
| FAM19A5      | TG           |
| unknown      | DUSP4        |
| CLSTN3       | AMFR         |
| IGFALS       | ANTXR2       |
| unknown      | PSMF1        |
| C1orf70      | TNS1         |
| C1orf213     | ADPRHL1      |
| CXCL6        | MGC13005     |
| ECHDC3       | PLCB4        |
| MIF4GD       | TPM3         |
| RAB31L1      | RAD1         |
| DBP          | LOC100128130 |
| PLAU         | DLEU2L       |
| CD40         | LMTK2        |
| C11orf71     | PSAT1        |
| RENBP        | LRRC2        |
| LPCAT4       | ZC3HAV1      |
| MIB2         | AP4S1        |
| JPP          | LOC100293611 |
| CD40         | NCAM1        |
| LOC254128    | ZNF107       |
| SEPT5        | PDS5A        |
| C22orf23     | FZD6         |
| RP1-21O18.1  | FOXH1        |
| TNXB         | PTPN14       |
| CC2D1A       | ANP32E       |
| unknown      | KDELC2       |
| unknown      | KNTC1        |
| TNFRSF6B     | ENPP1        |
| TMEM180      | IMPAD1       |
| TAS1R1       | PAWR         |
| GYG2         | FHL2         |
| LOC100128184 | MARVELD2     |
| unknown      | ARL4A        |
| CYP1A1       | RBMX         |
| HTRA3        | SNCAIP       |
| FOXP2        | DCLRE1B      |
| C10orf75     | PGM2         |
| TNFRSF6B     | ZNF280B      |
| ACP6         | SGCD         |
| RINL         | PCBD2        |
| SYNGR1       | LOC283624    |
| GTF2IRD2     | DPF3         |
| PDE4A        | FLJ27352     |
| unknown      | TAF5         |
| SPIN3        | C12orf32     |
| ELMO3        | ABCG2        |
| C16orf86     | MTSS1        |
| NEIL1        | PAX9         |
| C9orf50      | PPP1R14A     |
| CATSPER1     | MID1         |
| RNF208       | LOC729839    |
| LOC728431    | PAX9         |
| EPHB6        | LOC285638    |
| ABCA4        | RNF38        |
| POU5F1       | FANCB        |
| PAR-SN       | MEG8         |
| LOC100288439 | PARP11       |
| SILV         | SAMD9L       |
| WBSCR27      | unknown      |
| FLT3LG       | PIWIL2       |
| FERMT3       | LZTS1        |
| CA5A         | ACOT11       |
| ADCY4        | LOC100131686 |
| FLJ42875     | unknown      |
| C1orf211     | LOC554203    |
| unknown      | PRDM15       |
| LOC388849    | ERI2         |
| HAR1B        | unknown      |
| CCDC40       | TRIM59       |
| ABCA8        | PRKG1        |
| LOC389634    | CC2D2A       |
| SLC16A8      | LOC100216001 |
| NCRNA00110   | BIRC3        |
| ELL3         | RHBDL2       |
| GADD45G      | NQO1         |
| FAM40B       | unknown      |
| PAQR8        | TNFSF10      |
| METTL7B      | LCTL         |
| CASP8        | SYNPO        |
| FAM84A       | ANO4         |
| FAM198A      | unknown      |
| RAB3D        | KBTD8        |
| unknown      | FLJ43315     |
| SENP7        | CASP10       |
| PTPRCAP      | unknown      |
| LOC284630    | SGCD         |
| LOC728806    | TYRO3P       |
| LOC844246    | CDC42        |
| NUDT14       | GNG4         |
| CHST6        | HAUS5        |
| FLJ40125     | DOCK5        |
| FGF22        | C8orf34      |
| FAM189A1     | DCBLD1       |
| SYNPO2       | PRIM2        |
| SYNGR1       | NEXN         |
| GTF2IRD2     | TRIM6        |
| PVR          | KRT15        |
| SLC35A1      | unknown      |
| ALDOC        | unknown      |
| ABHD1        | VIT          |
| INCA1        | LOC100291610 |
| LYPD3        | unknown      |
| TMEM180      | FAM83G       |
| FUT5         | SEPT6        |
| TAC3         | NRP2         |
| unknown      | SELI         |

|              |              |
|--------------|--------------|
| MORG1        | SPINT2       |
| PPP5C        | SH3D20       |
| ALS2CR8      | C4orf39      |
| TMIE         | P2RX5        |
| GAB3         | C21orf58     |
| FTCD         | unknown      |
| unknown      | GABPB2       |
| ART5         | KONE1L       |
| unknown      | HSPB6        |
| EDA2R        | CCIN         |
| unknown      | DOK5         |
| LOC100131426 | CEP250       |
| MAMLD1       | PITPNM3      |
| ALDH3B1      | RPS26        |
| ALDH3B1      | C1GALT1      |
| FNDC3A       | unknown      |
| ARHGAP5      | ARHGAP19     |
| BEX4         | C3orf59      |
| LOC390595    | CENPL        |
| C2orf64      | BMPER        |
| TTTC21A      | unknown      |
| LOC644450    | CEP170       |
| TMEM38B      | MID2         |
| ANKRD42      | FOSB         |
| IFT80        | BEND7        |
| FAM59A       | C1orf230     |
| FAM65C       | MAGOHB       |
| DTWD1        | INPP5F       |
| ABR          | ANP32E       |
| FAM89A       | TOR1AIP2     |
| ALDH3A2      | NPTX1        |
| PLSCR1       | RCAN3        |
| PTPRN        | unknown      |
| ACTR3B       | HMG8L1       |
| NTNG1        | KCNK1        |
| ZCCHC2       | unknown      |
| MRPS25       | CKAP2        |
| ANKRD26      | unknown      |
| NIPAL4       | XG           |
| CCDC57       | LOC646049    |
| ENO3         | DNA2         |
| MMAB         | BHMT2        |
| EFEMP1       | C14orf37     |
| DYNC2H1      | ATP2B4       |
| ZNF148       | unknown      |
| COX18        | LOC541467    |
| unknown      | unknown      |
| TET1         | PTPRJ        |
| USP53        | ADAMTS1      |
| CCT6B        | PTPRR        |
| UACA         | CPXM2        |
| GPR155       | ALPK2        |
| CRTC1        | ROR1         |
| RAPGEF3      | C6orf105     |
| MAFB         | POLE2        |
| CCDC30       | RQCD1        |
| LOC100129295 | ANP32E       |
| EBF1         | CHM          |
| AGL          | KCNMA1       |
| SCARNA16     | unknown      |
| CMT8         | GATA6        |
| PARP6        | C3orf32      |
| CROT         | UBE2T        |
| LOC283481    | LNPEP        |
| C6orf89      | ADAMTS6      |
| CECR6        | BBS5         |
| FOXO4        | ALDH1A3      |
| FBXO4        | RAD54B       |
| RPP30        | BNC1         |
| ITPKB        | FBXO5        |
| SLC35A1      | ABCA3        |
| OSBPL5       | FRMD6        |
| PLSCR4       | RCAN3        |
| POU5F1       | CXCL3        |
| CCBL2        | unknown      |
| unknown      | unknown      |
| LOC100132529 | unknown      |
| PTGDR        | unknown      |
| C9orf24      | HIST1H4H     |
| LOC100216546 | TBX21        |
| PAQR5        | TIMELESS     |
| PRDM6        | unknown      |
| LOC401022    | GRAMD1B      |
| FAM161A      | RAB3B        |
| unknown      | NET1         |
| KCNK7        | LRRC3        |
| UVRAG        | LBH          |
| NFYA         | SP110        |
| SLAIN2       | ROR1         |
| CYP27C1      | WDR20        |
| ZNF720       | H2AFX        |
| FRZB         | NEFL         |
| SPATA13      | VPSS3        |
| CRIPAK       | ANKRD44      |
| KCTD15       | PGGT1B       |
| PRKXP1       | unknown      |
| ZMYM2        | ZNF738       |
| NTSDC1       | unknown      |
| PRKAA1       | RHBDL2       |
| BEX1         | LOC440300    |
| WDR33        | CIT          |
| VPS13A       | LOC554202    |
| LOC100130141 | OR7E37P      |
| FNBP1L       | BAIAP2L2     |
| KLHL24       | VEPH1        |
| LOC645752    | LOC100131315 |
| HS2ST1       | SSH1         |
| SMEK2        | ITGBL1       |

|              |              |
|--------------|--------------|
| DRD4         | PDIA3        |
| ANGEL1       | NCEH1        |
| SECISBP2     | unknown      |
| RPS29        | EPDR1        |
| NAB1         | PSMC3IP      |
| MAP2K5       | ALCAM        |
| FAM108C1     | RASAL2       |
| VSIG8        | ASXL1        |
| ATP6AP1L     | RABEP1       |
| CLDN15       | LXN          |
| DENND5B      | MGC16121     |
| unknown      | unknown      |
| MEIG1        | NEXN         |
| GPR125       | ZNF469       |
| C5orf27      | NUDT15       |
| SIPA1L2      | MYBL1        |
| PHKA1        | IKZF2        |
| NOG          | MICAL3       |
| ACVR2B       | LOC100128239 |
| LOC283070    | LOC100287359 |
| NBEAL2       | C14orf80     |
| C7orf61      | PRPS1        |
| RADIL        | LOC100131700 |
| GRAMD4       | PABPC4       |
| HSD17B7      | PLAC8        |
| ZNF397       | TBX1         |
| ZNF354A      | KIAA0556     |
| LOC100132288 | ZARI         |
| LRRIG3       | APOA5        |
| GPR62        | ZNF365       |
| LOC100131774 | LOC100291714 |
| TMEM182      | HIST1H2AM    |
| PLCL2        | unknown      |
| FAM178A      | NPAS1        |
| NDN          | OGDH         |
| SLC1A3       | C1orf144     |
| TUBE1        | WNT5B        |
| PMS1         | DUSP7        |
| BRWD1        | FAM46B       |
| POU6F1       | HIST1H2BK    |
| SGIP1        | CARD9        |
| GNL1         | LOC100129478 |
| MAP3K5       | HN1          |
| GSTA4        | DHRS3        |
| FAM149B1     | HAS1         |
| AGTPBP1      | FGF5         |
| CAPN7        | FORLB        |
| OMPK2        | LMO7         |
| NR8A1        | ITGA4        |
| USP15        | unknown      |
| ETNK1        | RBP1         |
| ZNF606       | LOC645967    |
| NFIA         | LRRC38       |
| LRRC39       | DEFB103A     |
| RASD1        | GRIK2        |
| COX19        | unknown      |
| PARP8        | unknown      |
| NINL         | TCTEX1D1     |
| LOC349196    | unknown      |
| LOC100134937 | C4orf31      |
| RHOQ         | unknown      |
| SPEP1        | LOC728463    |
| PARD6G       | unknown      |
| CISD1        | POFUT1       |
| LOC100216546 | CLDN14       |
| C2orf3       | BRCA2        |
| ABCC5        | unknown      |
| NUDT12       | MYRIP        |
| USP47        | CGNL1        |
| SYT11        | unknown      |
| SPRY3        | FAM22B       |
| NRCAM        | CYTSB        |
| LTB4R        | ISLR2        |
| NCRNA00173   | C9orf53      |
| LOC441178    | WNT1         |
| SYTL4        | SCUBE2       |
| unknown      | GRIK2        |
| FAM13A       | C6orf204     |
| C2orf60      | ITPK1        |
| SPATA13      | ODZ3         |
| BCAS3        | TRIM29       |
| ACAD10       | KIR3DP1      |
| WDR35        | RBM47        |
| PLA2G12A     | TCF19        |
| ACTR3B       | GAS2L3       |
| CWF19L2      | unknown      |
| LPAR2        | SVIP         |
| PIGV         | BTBD9        |
| TTLL3        | GKN1         |
| IFIH1        | EYA2         |
| TAF4B        | GREB1L       |
| MESP1        | EPCAM        |
| CLIP4        | ANO6         |
| DNM3         | HLA-DRB4     |
| CAPS2        | LOC651721    |
| ZNF658       | FAM71F2      |
| TMCC3        | LCE2C        |
| PPFIA4       | SLC1A4       |
| OPRL1        | ECM2         |
| LOC100190939 | MPP4         |
| ZNF630       | OXTR         |
| VWF          | C8orf46      |
| C11orf20     | CKAP2        |
| LOC374491    | unknown      |
| ABCC6        | ADAMTS6      |
| BCAS3        | TEX12        |
| FBLN1        | RPL10        |
| TCEA2        | MYL10        |

|              |              |
|--------------|--------------|
| LOC645212    | LOC642350    |
| ARG2         | C11orf41     |
| CITED4       | C2orf88      |
| ZBTB16       | SCN9A        |
| MLLT6        | KCNJ12       |
| PTGDS        | SYN3         |
| LOC642413    | FRMD5        |
| DHX58        | LOC100240735 |
| REEP6        | unknown      |
| THNSL2       | LOC644422    |
| CARD10       | BRIP1        |
| CNIH3        | MPP4         |
| EGFL8        | DBF4         |
| SULT1A4      | TNFRSF19     |
| NOV          | WDR67        |
| DNAL4        | FLJ12825     |
| CDKN2A       | unknown      |
| C13orf33     | ZNF367       |
| SLAMF8       | SYNPQ2L      |
| ABHD8        | unknown      |
| CTSF         | ITGA8        |
| PARP6        | C17orf76     |
| CEND1        | unknown      |
| SHANK3       | DEF6         |
| GAS1         | unknown      |
| XPA          | JPH3         |
| ZNRF1        | FASLG        |
| SPATA13      | TRPM6        |
| MUC1         | CD24         |
| NFS1         | MKI67        |
| CTSK         | LOC100131366 |
| C4orf29      | NCRNA00092   |
| IL27RA       | FOXP1        |
| PALM         | PLEKHB1      |
| C9orf72      | unknown      |
| RIMBP3       | unknown      |
| HOXD3        | LOC645307    |
| STAMPB       | DHX57        |
| PACRGL       | CLDND2       |
| LOC255512    | LOC728145    |
| ZFYVE28      | CHRM3        |
| CPAMD8       | DENND2C      |
| PCCA         | ROR1         |
| SYNGR3       | HOXD9        |
| BCAS3        | LOC100128055 |
| unknown      | unknown      |
| VPS13C       | PITX1        |
| unknown      | FAM101A      |
| PFKFB3       | ELN          |
| unknown      | WDR62        |
| ABL1         | C20orf118    |
| MAPK12       | BANK1        |
| SLC25A42     | C1QTNF2      |
| SEZ6L2       | VPSS3        |
| PPP1CB       | unknown      |
| PPARG        | SPTBN1       |
| RSL1D1       | LOC100131910 |
| ATRN         | ZNF681       |
| BSCL2        | DAND5        |
| FLJ90757     | YIF1B        |
| ADC          | SLC8A1       |
| TM4SF1       | unknown      |
| CC2D1A       | KIF18B       |
| CCDC102A     | ESRRG        |
| IFIT2        | DOK6         |
| PRMT2        | PTCRA        |
| SERPING1     | ABCB1        |
| CTSB         | unknown      |
| AGPAT4       | AADAC        |
| C1orf97      | LOC348751    |
| SLC43A3      | SOX17        |
| C2orf43      | KIAA1217     |
| IFTTM4P      | unknown      |
| ZDHHC3       | HLA-DRB5     |
| C6orf64      | HMGCLL1      |
| LOC644525    | unknown      |
| TTC8         | IGFBPL1      |
| NINJ1        | unknown      |
| ATG4C        | POLE         |
| FUK          | SLC25A21     |
| SIRT5        | unknown      |
| AHSA2        | ARL5B        |
| FAM60A       | LOC652554    |
| CHKB         | unknown      |
| PLK1S1       | MYOCD        |
| SLC6A6       | GRHL3        |
| CTBS         | unknown      |
| PRPF40B      | unknown      |
| BBS9         | CYP3A7       |
| LOC644021    | D4S234E      |
| C6orf154     | C14orf145    |
| unknown      | TDRD9        |
| unknown      | FRMPD4       |
| RNU1-5       | SMC1A        |
| LOC100286937 | C6orf114     |
| LPHN2        | SORCS2       |
| TRPS1        | LOC650293    |
| C1orf66      | PVRIG        |
| PSMB9        | SAA2         |
| CEPT1        | FAM53A       |
| VAMP8        | AK5          |
| LOC100293193 | CDH18        |
| PTGS1        | DCBLD1       |
| ZGLP1        | C20orf103    |
| GNPMB        | WNT16        |
| CRTAP        | FLVCR2       |
| EMX2OS       | unknown      |
| TMEM25       | MARCH4       |

|              |              |
|--------------|--------------|
| SVIL         | INPP4B       |
| MSX2P1       | FAM26E       |
| GBE1         | SSTR1        |
| DEAF1        | C16orf11     |
| SNORD3B-1    | PDZK1        |
| PLEKHA4      | GSTA2        |
| ANKZF1       | KDEL2        |
| ANKRD37      | WNT11        |
| DTWD1        | PPPDE2       |
| SGIP1        | RECQL5       |
| unknown      | SGCD         |
| PDE4B        | ABI3BP       |
| N6AMT1       | PTGIS        |
| C2orf64      | FBN1         |
| PIP5KL1      | INCENP       |
| PNRG1        | C10orf47     |
| ARL3         | BMPER        |
| IMPA2        | C1orf118     |
| KLF2         | RBM33        |
| GPD2         | GPAT2        |
| TMEM150A     | CCDC134      |
| OPN3         | FAM105A      |
| DGAT2        | PTPRR        |
| LOC728537    | USP41        |
| C17orf100    | SNX26        |
| LOC375190    | DYNC111      |
| RBBP4        | NKAIN1       |
| CD302        | HIST1H2BJ    |
| C9orf64      | KRT83        |
| VAMP1        | FCHSD2       |
| C1S          | FAM198B      |
| TMEM35       | MNS1         |
| PSEN2        | NGAPG2       |
| C17orf108    | GINS1        |
| MBTD1        | unknown      |
| C21orf122    | RASAL2       |
| unknown      | RNF152       |
| ARRB1        | unknown      |
| TRKH         | TNFRSF10C    |
| unknown      | BRCA1        |
| LYPLAL1      | unknown      |
| PHC1         | HELLS        |
| LOC283050    | FAM7A1       |
| FAM120C      | unknown      |
| C4orf49      | FNDC1        |
| LASS1        | TMPO         |
| FCHO1        | HSPB8        |
| TSPAN11      | BLM          |
| REV3L        | unknown      |
| NOC3L        | unknown      |
| TMEM38B      | SMC4         |
| CHURC1       | UHRF1        |
| NOTCH4       | ST8SIA5      |
| CXorf57      | LOC388780    |
| FLJ40125     | unknown      |
| LIPT1        | LMO2         |
| SOCS1        | LOH3CR2A     |
| unknown      | STC2         |
| HSPC157      | COLEC11      |
| RFESD        | SKA2         |
| LOC100130557 | RACGAP1      |
| TNNG2        | C6orf173     |
| TMC4         | PACSIN1      |
| CABC1        | IGFBP1       |
| LOC728392    | LOC727916    |
| DCAF8        | unknown      |
| KIAA1199     | SETD8        |
| LOC646999    | unknown      |
| DENND1A      | PDLIM4       |
| TMEM158      | UBASH3B      |
| CXCL14       | GINS4        |
| MYLIP        | SLC35D1      |
| LPHN2        | C3orf52      |
| TLR2         | DNAJB4       |
| ZCWPW1       | unknown      |
| LOC286052    | PTER         |
| JAG1         | DARS2        |
| NRARP        | C1orf118     |
| DISC1        | WHSC1        |
| IQCK         | unknown      |
| PCSK5        | MRAP2        |
| ENOX1        | LOC387647    |
| FZD4         | HHAT         |
| ISOC1        | HELLS        |
| RGS2         | LOC729595    |
| EFCAB7       | ITGA4        |
| PPARG        | C1orf135     |
| TRIM47       | BAALC        |
| unknown      | CTPS2        |
| MOSC2        | PTX3         |
| ZNF254       | E2F1         |
| AGPAT5       | PF4          |
| NFIL3        | MMP7         |
| BBS2         | GALNT10      |
| ZNF22        | KIF20B       |
| C8orf40      | COL12A1      |
| CDH13        | SGOL2        |
| AUH          | C11orf82     |
| SMARCA1      | LOC100128242 |
| TRNAU1AP     | ASF1B        |
| RAB33A       | PRC1         |
| SCD5         | KRT19        |
| HMGN5        | CENPN        |
| SH3BP5       | LOC283788    |
| SLC35E2      | SLC22A20     |
| unknown      | KONS2        |
| TRAF5        | C19orf53     |
| ADAL         | unknown      |

|              |              |
|--------------|--------------|
| PXMP4        | LSAMP        |
| NFKBIZ       | ZNF623       |
| TNKS         | unknown      |
| LOC100128292 | FANCA        |
| SLOC22A5     | GRIK2        |
| C1orf213     | NFASC        |
| RXRβ         | HIST1H2AC    |
| IRX5         | EVI2A        |
| PRMT2        | DMC1         |
| NTNG1        | SUFU         |
| MSI2         | HIST1H4F     |
| LOC388630    | unknown      |
| BCR          | HIST1H2BD    |
| PBXIP1       | unknown      |
| ATP6V0E2     | ADARB1       |
| C14orf132    | unknown      |
| GPR125       | WHSC1        |
| unknown      | C1QL1        |
| PRKAR1B      | KCNF1        |
| AXIN2        | ARSI         |
| C17orf96     | unknown      |
| C1orf54      | TAF13        |
| ASGR1        | C1orf51      |
| SLC36A4      | CCDC80       |
| CFH          | DOCK5        |
| ZNF438       | P2RX5        |
| TMCO4        | C11orf91     |
| FFGT         | PLCXD1       |
| LOC285550    | GDPD3        |
| WDR19        | SSR3         |
| FLJ37798     | BRI3BP       |
| QPCT         | HAS1         |
| C1orf133     | THBS1        |
| C11orf54     | KIRREL3      |
| SIRT5        | NRGN         |
| PREX1        | GSC          |
| SAMD10       | LHPP         |
| CLK4         | HIST1H2BG    |
| ABHD6        | SIRPB1       |
| C10orf104    | CA5BP        |
| TTC14        | NGF          |
| ZNF333       | STXBP6       |
| CCDC25       | HHIPL1       |
| LOC390940    | CDA          |
| MTERFD3      | MGC72080     |
| CCPG1        | unknown      |
| IFT81        | TNFRSF10A    |
| EEPD1        | unknown      |
| ZNF280D      | CCDC25A      |
| SLC25A37     | KIF22        |
| LNP1         | KIF22        |
| GPD2         | PSG8         |
| TMEM106B     | unknown      |
| SCD          | CCDC89       |
| CTH          | NINJ2        |
| C14orf147    | IL13RA2      |
| PARP12       | GATC         |
| LMBRD1       | EFCAB4B      |
| VGLL3        | unknown      |
| ACPL2        | ADAM19       |
| NEAT1        | MELK         |
| GHR          | GABPB1       |
| C8orf83      | GPAT2        |
| C3orf70      | WDR51A       |
| KLHL5        | BDNF         |
| ZNF280C      | ATP2B4       |
| MDM1         | STXBP6       |
| SCAI         | ABCC9        |
| DENND5B      | DCBLD2       |
| unknown      | HIST2H2BF    |
| CLCN4        | SHROOM3      |
| KLHL2        | TCOF1        |
| TMEM143      | CDKN2C       |
| VPS41        | CENPN        |
| LOC222699    | CHST10       |
| LOC100134387 | ENPP1        |
| PLBD2        | CENPO        |
| LOC642852    | GINS3        |
| BEND6        | ENPP2        |
| LAMA4        | PTTG1        |
| C6orf162     | MDM1         |
| TLR4         | ARHGEF5L     |
| TRO          | GFRA1        |
| RFTN2        | SOC37        |
| DHX40        | unknown      |
| LEPR         | DAB2IP       |
| CCL27        | LIN7A        |
| BRWD1        | IL17B        |
| LHX6         | LOC100128994 |
| C8orf85      | unknown      |
| HTRA3        | LOC150381    |
| SRRM3        | SKA2         |
| HGFC2        | WWP2         |
| ABCA5        | SPATA4       |
| DDX17        | HIST1H1B     |
| KIAA1712     | FANCD2       |
| PROS1        | WDR76        |
| C11orf70     | unknown      |
| BRWD1        | HIST1H2BC    |
| RFX3         | MPHOSPH9     |
| POLI         | IL32         |
| RCOR2        | CDH4         |
| SPG20        | CDH2         |
| LOC254057    | RBL1         |
| TMEM187      | KRT34        |
| unknown      | PSG2         |
| ZFYVE16      | VIT          |
| unknown      | VCAN         |

|               |              |
|---------------|--------------|
| XPR1          | LOC81691     |
| ALPK1         | TRIP13       |
| WDR60         | IFI44        |
| SESTD1        | LRRCL15      |
| MAN1C1        | ULBP3        |
| unknown       | unknown      |
| ALDH7A1       | LOC100129532 |
| LOC389493     | TMEM164      |
| LOC91450      | ENHO         |
| GATAD2B       | FRMPD4       |
| LOC645158     | LCE3D        |
| FOXK2         | MYBL2        |
| ANKRD46       | IQGAP3       |
| CC2D2A        | CCDC8        |
| CHIC1         | unknown      |
| unknown       | unknown      |
| ZNF230        | STIL         |
| AR            | PAX6         |
| NPHP4         | unknown      |
| SLC3A1        | CDH15        |
| ZNF638        | RASSF2       |
| NHLRC4        | C11orf41     |
| C20orf94      | TTLL5        |
| SEN7          | C3orf43      |
| KGFLP2        | PLXNA2       |
| DNAJC24       | TRIM63       |
| MTR           | PCOTH        |
| SLC2A3        | PTPRS        |
| KRTAP10-1     | CCNB1        |
| FBXO24        | DMRT2        |
| ZNF25         | MGC72080     |
| unknown       | KY           |
| LRCC1         | TES          |
| COL11A2       | PODHGB1      |
| unknown       | TMEM106A     |
| PNRG1         | CDC42EP3     |
| TTBK2         | unknown      |
| TCFL5         | IL22RA1      |
| KIAA0802      | TRIM6        |
| LOC100129550  | RIBC2        |
| MYO1D         | CAP2         |
| TNFRSF14      | KIF20B       |
| KIAA1530      | DHFR         |
| IFT74         | LOC728353    |
| ZNF605        | FLYWCH1      |
| FBXO41        | MYPN         |
| ZNF862        | GCNT1        |
| C3orf23       | KCNJ2        |
| IERSL         | FERMT1       |
| TRIM2         | EPHB2        |
| COG6          | CCNE2        |
| CORO6         | FOXF1        |
| AZ12          | ZNF280D      |
| INSIG2        | PRPH2        |
| LOC730236     | ALDH1A1      |
| MDM4          | ATAD5        |
| PCTK2         | AMIGO2       |
| PSD3          | unknown      |
| PM2DD2        | DSCC1        |
| LEPROT        | RAPGEF6      |
| MEGF8         | UBE3C        |
| INTS8         | LOC730961    |
| LARP1B        | AURKAPS1     |
| SCARNA9       | KIF14        |
| ADAMTS13      | CPA4         |
| UOCRB         | PDGFD        |
| RDH10         | LOC440900    |
| EXOC6B        | AGMAT        |
| SHPRH         | unknown      |
| ZNF720        | ALDH1L2      |
| FANCL         | MLF1IP       |
| CLIP4         | PITX1        |
| LOC100130107  | RAD51        |
| CLIP4         | CENPF        |
| LUO7L         | MND1         |
| NIPSNAP1      | FOXSI        |
| SLC35B4       | LOC100131262 |
| IFI16         | HMG83        |
| LOC284219     | BTBD11       |
| HELQ          | CAMK4        |
| MTAP          | CACNA2D1     |
| DYNC2L1       | ACACA        |
| C6orf57       | LOC100133479 |
| KLRAQ1        | ESYT3        |
| USP45         | KCNMA1       |
| RNF13         | MMP24        |
| ZNF383        | PSG11        |
| OPNE5         | ADRA1D       |
| unknown       | KIAA0226     |
| ZCCHC6        | LOC645978    |
| BBS10         | IL21R        |
| ACADM         | RUNX1        |
| FBXL16        | SERPINB7     |
| STAT5B        | IL32         |
| TTC13         | FAM88B       |
| unknown       | CHAC1        |
| HECTD2        | KIF26B       |
| CA12          | UHRF1        |
| C3orf72       | unknown      |
| ATP7A         | PTTG2        |
| DKFZP586I1420 | TLX2         |
| NBEA          | FUCA1        |
| ZNF25         | EDN1         |
| IFT88         | CTGF         |
| NDRG2         | S1PR1        |
| SLC25A36      | B4GALT1      |
| VPS13C        | POSTN        |
| SLC5A3        | ITGA11       |



|           |           |
|-----------|-----------|
| SP4       | CRYAB     |
| TRIM45    | TAGLN     |
| FAM91A1   | SUV39H1   |
| GCA       | FANGD2    |
| TRPS1     | C14orf37  |
| FBXL17    | FAM72D    |
| ZNF292    | E2F7      |
| CXorf23   | HHIP      |
| FGFBP3    | NXN       |
| DAK       | MRPL1     |
| ZBTB41    | ORC6L     |
| ERO1LB    | ANGPT1    |
| MTMR9L    | RAGE      |
| HERC2P7   | ANKRD2    |
| SYT3      | unknown   |
| HR        | MAD2L1    |
| LOC653510 | CPXM2     |
| N4BP1     | TAGLN     |
| C5orf45   | RAD51AP1  |
| ACADS     | CDCA5     |
| STAT3     | CDT1      |
| RALGDS    | CDKN3     |
| unknown   | TYMS      |
| DNPEP     | KCNC4     |
| RNF13     | AURKA     |
| SP3       | CCDC8     |
| PLEKHH3   | CENPE     |
| OREG1     | HSPB3     |
| ZNF354B   | ORC1L     |
| RPRD1A    | B4GALNT1  |
| METT5D1   | PRR11     |
| SERPING1  | RAMP1     |
| MCL1      | PKMYT1    |
| MGC21881  | CDCA5L    |
| NFXL1     | FAM25A    |
| TTC32     | PDGFB     |
| ZFP90     | FBXO43    |
| IRAK2     | PLCB4     |
| unknown   | XKRX      |
| PLEKHA1   | C5orf13   |
| WDFY3     | BLK       |
| LOC200609 | EDN1      |
| CREB2F    | UNKL      |
| FAM162A   | WHSC1     |
| COL8A2    | COL5A1    |
| FBXO46    | LOXL3     |
| KDSR      | unknown   |
| LRIG3     | CENPN     |
| GBP3      | GAD1      |
| HEY1      | MATN3     |
| GALC      | VSTM2L    |
| RPS6KA5   | C15orf42  |
| BIVM      | LBH       |
| ATG5      | LOC145694 |
| RBL2      | PPM1F     |
| ZFP161    | ADAM19    |
| GABARAPL2 | MYLK2     |
| CHML      | OR8B8     |
| ITM2C     | FAM107A   |
| LOC286161 | unknown   |
| C5orf23   | LOC646324 |
| CCDC74B   | EPHB2     |
| CPSF3     | unknown   |
| IGFBP2    | PSG5      |
| R3HDM2    | SPAG5     |
| ZNF277    | RAD54L    |
| DENND4C   | LATS1     |
| RC3H2     | ZWINT     |
| ZNF266    | HSPB7     |
| TANC2     | KIF23     |
| PRPF4B    | HIST1H3B  |
| SESTD1    | COL8A1    |
| MARCH6    | DIRAS3    |
| PAX3      | unknown   |
| SFRS18    | MASP1     |
| DOCK11    | CDCA2     |
| WTAP      | FAM54A    |
| NDRG3     | NUSAP1    |
| VAMP4     | unknown   |
| PSD3      | CECR1     |
| SLC25A36  | HIST1H2AC |
| LPAR1     | EXO1      |
| SCAMP1    | LEPREL1   |
| DSEL      | LOC400043 |
| SP100     | DKK1      |
| PCM1      | IGFBP3    |
| WARS2     | TK1       |
| unknown   | CDCA8     |
| C14orf139 | NDC80     |
| PLEKHA1   | CCNB1     |
| SFRS12    | MYO16     |
| TECPR2    | unknown   |
| RIGB8     | ZWINT     |
| C9orf95   | NEURL1B   |
| PKNOX1    | PALMD     |
| RALGAPA1  | NRN1      |
| LOC399744 | DTL       |
| HDAC5     | TOP2A     |
| APBB3     | OIP5      |
| DDX58     | IL7R      |
| EFHA2     | SEMA7A    |
| OSBPL8    | LOC729983 |
| CTBS      | GINS2     |
| unknown   | KIAA0101  |
| SLC25A37  | unknown   |
| unknown   | NOX4      |
| HLA-B     | CDKN3     |
| AKAP12    | MALL      |

|              |              |
|--------------|--------------|
| GCOM1        | C9orf140     |
| HLA-B        | PT16         |
| MYO1B        | PTTG3P       |
| ADH5         | SNORD12B     |
| unknown      | OPLX3        |
| MXD4         | AZU1         |
| ARRDC3       | NKX6-2       |
| LOC203274    | unknown      |
| CREBBP       | MOBK1A       |
| ZCRB1        | UTRN         |
| IDUA         | FAM160A1     |
| AKR1C3       | LOC151484    |
| unknown      | unknown      |
| unknown      | OR10G3       |
| unknown      | TEX28        |
| ACPL2        | LRRC4        |
| AKAP11       | LOC284232    |
| AKR1B1       | LOC339894    |
| ATG2A        | TCP11        |
| CYBRD1       | GALNT12      |
| IER3         | LOC100293406 |
| PSMB8        | unknown      |
| STEAP3       | LOC100129652 |
| OCEL1        | THSD1        |
| IGSF8        | unknown      |
| OBFC1        | TMEM87A      |
| EID3         | LOC100129900 |
| QPCT         | RREB1        |
| C9orf116     | MS4A5        |
| C9orf169     | unknown      |
| STARD10      | COL17A1      |
| RTN2         | HORMAD2      |
| MLYCD        | C17orf77     |
| CAMK2N2      | ZDHC19       |
| C16orf79     | LOC100128230 |
| D2HGDH       | OAS2         |
| CCBL2        | unknown      |
| CABLES1      | LOC647343    |
| RNASE4       | unknown      |
| APC2         | unknown      |
| C1orf97      | ACAN         |
| unknown      | SPINK5L2     |
| IDS          | PLA2G1B      |
| LRRC28       | TAS2R19      |
| LOC100289097 | LOC441208    |
| ITM2C        | BECN1L1      |
| PITPNM1      | KIAA1644     |
| MXD4         | CXorf36      |
| PACSN3       | GPR75        |
| NFATC1       | unknown      |
| MAP3K14      | REG1B        |
| NES          | unknown      |
| C9orf16      | C9orf47      |
| LOC100130633 | FUT1         |
| C21orf119    | unknown      |
| PEX1         | IL21         |
| PLD3         | OR51D1       |
| TMEM79       | NMS          |
| unknown      | unknown      |
| TMCO4        | unknown      |
| HSD17B7      | LOC642635    |
| IL4I1        | TRIOBP       |
| SMAD5OS      | unknown      |
| GYPC         | FLRT1        |
| ELMOD3       | LOC100132474 |
| ZNF358       | unknown      |
| CYB5D2       | unknown      |
| GLTSCR2      | unknown      |
| IGSF8        | FAM41C       |
| SARM1        | PRODH        |
| SPSB3        | unknown      |
| C21orf63     | LOC648822    |
| unknown      | LOC100132972 |
| SERPINA3     | unknown      |
| FLJ35220     | LOC285000    |
| ALKBH2       | PHOX2B       |
| HS1BP3       | HIST2H2BA    |
| LOC646808    | SMOC2        |
| NES          | FGF5         |
| CYHR1        | GRIP2        |
| SEPT5        | LOC728530    |
| EML2         | OR51B2       |
| C1QTNF6      | CNTN1        |
| LRRC24       | LOC100133500 |
| PSAP         | ZNF140       |
| C12orf57     | LOC1720      |
| AVP11        | NKAIN2       |
| IFITM3       | LOC100132733 |
| RER1         | ART4         |
| CD68         | IGSF1        |
| PHC1         | SLC26A3      |
| PRR24        | hCG_1793639  |
| ACVRL1       | PRODH2       |
| SDR39U1      | IL1F9        |
| SLC39A1      | MCF2L        |
| ECH1         | TPSAB1       |
| SIPA1        | LOC100131673 |
| SMARCD3      | tcag7.1307   |
| PGAP3        | CNOT2        |
| BCKDHA       | RAD21L1      |
| CCS          | WNT3A        |
| JMY          | ERVWE1       |
| LOC100130107 | unknown      |
| JUP          | C19orf41     |
| unknown      | INPP4B       |
| ANGPTL6      | ATCAY        |
| CTSL1        | ZNF501       |
| GGT5         | HBA2         |

|               |              |
|---------------|--------------|
| PBXIP1        | unknown      |
| VWCE          | FAM178A      |
| LOC730183     | LOC100131608 |
| CLK1          | PLD4         |
| TGFBR3        | GPR1         |
| unknown       | FAM169A      |
| ZNF395        | LOC100130171 |
| AOX1          | unknown      |
| SLC36A4       | PSMB11       |
| RPAIN         | SEMA3D       |
| DFNA5         | FAM154B      |
| PLIN2         | BMP8A        |
| C20orf108     | WHSC1        |
| TNFAIP8       | TEX14        |
| C7orf41       | NARG1L       |
| C4orf52       | MATN3        |
| GNPDA1        | unknown      |
| SCARB1        | FAM98B       |
| GPX4          | HIST2H2BE    |
| GAA           | IKZF2        |
| SNORD3B-1     | LOC729911    |
| SLC9A9        | CACNA1E      |
| CUL7          | CXorf67      |
| NFATC4        | TRIML2       |
| PIGZ          | unknown      |
| PLAU          | PRLR         |
| FOS           | unknown      |
| CD55          | unknown      |
| RPAIN         | LOC100292021 |
| MACROD1       | ZNF100       |
| GEM           | ATPBD4       |
| SYNJ2         | tcag7.929    |
| NNMT          | CYCSP52      |
| LOC645722     | CYP4A22      |
| PTBP2         | LOC727918    |
| SBSN          | unknown      |
| unknown       | C12orf36     |
| EVC2          | FMO6P        |
| NEURL4        | unknown      |
| PLD2          | unknown      |
| unknown       | unknown      |
| TMEM42        | unknown      |
| RPS23         | REG4         |
| MZF1          | PPP2R2B      |
| TRPT1         | ZNF154       |
| IGF1R         | unknown      |
| ZRANB2        | LOC400743    |
| ZNF664        | GRIA4        |
| DZIP1         | ANKRD24      |
| LIPA          | unknown      |
| TP53TG1       | CACNG2       |
| RB1CC1        | GPR32        |
| SNX27         | CAV3         |
| C21orf2       | PGLYRP3      |
| HDHD2         | MYO5B        |
| N4BP2L2       | LOC100131320 |
| PDE4A         | LOC203510    |
| ZFC3H1        | TMPRSS2      |
| LUC7L3        | unknown      |
| DRAM2         | NCRNA00092   |
| MAP3K10       | unknown      |
| NFS1          | unknown      |
| METTL7A       | C19orf21     |
| EGFL7         | HLA-L        |
| FAM20C        | unknown      |
| TMEM205       | HAO1         |
| ARRB2         | CUX2         |
| GLRX          | ZNF569       |
| DHRS1         | MT1H         |
| TMEM216       | OR1L6        |
| DKFZP586K1520 | unknown      |
| FAM43A        | unknown      |
| TUBA4A        | GAD1         |
| NME3          | unknown      |
| KREMEN1       | ZSCAN1       |
| ANKRD28       | RPRML        |
| C16orf58      | SLC30A5      |
| LOC100129122  | C22orf34     |
| unknown       | LOC100131642 |
| KAT2A         | ZNF625       |
| ASS1          | CLDN16       |
| AOX1          | FLJ45482     |
| LUC7L         | unknown      |
| FAM82B        | LOC653712    |
| GDF11         | C12orf27     |
| SSC5D         | BMF          |
| SAT1          | ALDOB        |
| C21orf57      | unknown      |
| AKAP12        | HERC6        |
| INTS10        | SLC22A24     |
| CYP27A1       | ASPA         |
| CRYL1         | CEACAM1      |
| NAT14         | LOC100128006 |
| SLC27A5       | unknown      |
| LOC730098     | DSPP         |
| RP11-345P4.4  | OR2M2        |
| ACP5          | unknown      |
| RNASET2       | TAGLN3       |
| ZNF182        | LOC388906    |
| OSMR          | LOC100129363 |
| TUT1          | RGAG1        |
| HMBOX1        | unknown      |
| FAM117B       | MPV17L       |
| PACS2         | HAND1        |
| SOX4          | OR10J3       |
| ABCB6         | LOC100287919 |
| FBXL18        | GUCY2G       |
| CROCCL1       | TMEM72       |

|            |              |
|------------|--------------|
| SP9        | ZFATAS       |
| IDS        | unknown      |
| TMEM8B     | LOC150822    |
| RAB27A     | ADAMTSL1     |
| FYCO1      | LOC644925    |
| CRYZ       | KCTD7        |
| CCDC41     | ASCL2        |
| ENO2       | UMODL1       |
| IER3       | FLJ30901     |
| SLC48A1    | TRIM77       |
| ULK3       | LOC100131195 |
| RNF130     |              |
| PHF20L1    |              |
| RN7SK      |              |
| PYDC1      |              |
| ZFR        |              |
| CAB39L     |              |
| ROM1       |              |
| DHRS7      |              |
| GRK5       |              |
| GPR177     |              |
| OSBPL1A    |              |
| CYP2R1     |              |
| IL6        |              |
| MMP11      |              |
| F12        |              |
| PSME1      |              |
| MMP2       |              |
| SELENBP1   |              |
| C2orf68    |              |
| IRAK3      |              |
| DPH5       |              |
| RHOBTB3    |              |
| PIGP       |              |
| C9orf169   |              |
| SNX1       |              |
| ZFP41      |              |
| FAM24B     |              |
| TSPAN14    |              |
| CREM       |              |
| C12orf76   |              |
| TM4SF1     |              |
| OSBPL7     |              |
| DDIT4      |              |
| HGSNAT     |              |
| THAP6      |              |
| THADA      |              |
| UBAC2      |              |
| LOC729678  |              |
| CRNDE      |              |
| C14orf104  |              |
| MC1R       |              |
| BAT2L      |              |
| EDA2R      |              |
| COL4A3BP   |              |
| CCR10      |              |
| TACC2      |              |
| ABCC3      |              |
| PDE4DIP    |              |
| PQLC3      |              |
| SH3YL1     |              |
| ZNF462     |              |
| GULP1      |              |
| ENGASE     |              |
| CSTF2T     |              |
| MANEA      |              |
| ORC2L      |              |
| EBF3       |              |
| LOC283861  |              |
| C20orf199  |              |
| ASS1       |              |
| CYP1B1     |              |
| RAB13      |              |
| HLA-J      |              |
| FBXO32     |              |
| ARHGAP12   |              |
| PDGFRB     |              |
| ETS2       |              |
| AVP11      |              |
| RNF130     |              |
| RPS6KA3    |              |
| HEXIM2     |              |
| WTAP       |              |
| EPB41L1    |              |
| ATG2A      |              |
| NUAK1      |              |
| PTPRS      |              |
| C3orf19    |              |
| GLI3       |              |
| COG5       |              |
| ALDH2      |              |
| KRCC1      |              |
| PHF20L1    |              |
| SNRPN      |              |
| MDP1       |              |
| GATAD1     |              |
| ST6GALNAC6 |              |
| SDCBP      |              |
| RABL2A     |              |
| BNIP3L     |              |
| STAT1      |              |
| NLGN2      |              |
| GRAMD1C    |              |
| TFPI       |              |
| DENND4C    |              |
| ZNF252     |              |
| DHX36      |              |
| SSC5D      |              |

|           |
|-----------|
| SSU72     |
| RIN2      |
| OGT       |
| LOC400099 |
| KIAA0232  |
