# Supplementary material for: Lactic Acid Bacteria Convert Human Fibroblasts to Multipotent Cells
Source: PubMed Central journal article supplement (PMC3530539; doi:10.1371/journal.pone.0051866), 2012-12-26
Supplement: pone.0051866.s013.pdf [file pone.0051866.s013.pdf]

Selected 37 pluripotency marker genes

| no | ProbeName     | GeneSymbol  | UniGeneID | GeneName                                                                   | Description                                                                                                      | Fold change<br>(LAB-inc. cells-1 vs HDF-1) | Regulation<br>(LAB-inc. cells-1 vs HDF-1) | Fold change<br>(LAB-inc. cells-2 vs HDF-2) | Regulation<br>(LAB-inc. cells-2 vs HDF-2) | raw data<br>(LAB-inc. cells-1) | raw data<br>(HDF-1) | raw data<br>(LAB-inc. cells-2) | raw data<br>(HDF-2) | Flag<br>(LAB-inc. cells-1) | Flag<br>(HDF-1) | Flag<br>(LAB-inc. cells-2) | Flag<br>(HDF-2) |
|----|---------------|-------------|-----------|----------------------------------------------------------------------------|------------------------------------------------------------------------------------------------------------------|--------------------------------------------|-------------------------------------------|--------------------------------------------|-------------------------------------------|--------------------------------|---------------------|--------------------------------|---------------------|----------------------------|-----------------|----------------------------|-----------------|
| 1  | A.23.P110851  | TERT        | Hs.492203 | telomerase reverse transcriptase                                           | Human telomerase reverse transcriptase (TERT), transcript variant 1. mRNA (NM_186253)                            | 1.02313                                    | up                                        | 1.01886                                    | up                                        | 95.27264                       | 96.42165            | 41.57469                       | 35.98146            | Detected                   | Detected        | Detected                   | Detected        |
| 2  | A.23.P13899   | IAPDH       | Hs.544577 | glyceraldehyde-3-phosphate dehydrogenase                                   | Human glyceraldehyde-3-phosphate dehydrogenase (GAPDH), mRNA (NM_000344)                                         | 1.10914                                    | up                                        | 1.04260                                    | down                                      | 135016.67000                   | 126047.44500        | 135888.95000                   | 124930.41000        | Detected                   | Detected        | Detected                   | Detected        |
| 3  | A.23.P14058   | ZNF296      | Hs.192237 | zinc finger protein 296                                                    | Human zinc finger protein 296 (ZNF296), mRNA (NM_145288)                                                         | 1.15618                                    | down                                      | 1.50267                                    | down                                      | 85.84721                       | 102.77403           | 57.32899                       | 76.02688            | Detected                   | Detected        | Detected                   | Detected        |
| 4  | A.23.P162547  | MYL2        | Hs.75555  | myosin, light chain 2, regulatory, cardiac, slow                           | Human myosin, light chain 2, regulatory, cardiac, slow (MYL2), mRNA (NM_000432)                                  | 3.15344                                    | down                                      | 2.83932                                    | down                                      | 73.80911                       | 241.00575           | 36.16277                       | 90.45007            | Detected                   | Detected        | Detected                   | Detected        |
| 5  | A.23.P204640  | NANOG       | Hs.661360 | Nanoq homeobox                                                             | Human Nanoq homeobox (NANOG), mRNA (NM_024855)                                                                   | 8.45846                                    | up                                        | 6.81780                                    | up                                        | 129.54599                      | 15.85863            | 67.59573                       | 8.73784             | Detected                   | Compromised     | Detected                   | Compromised     |
| 6  | A.23.P202739  | MEF2C       | Hs.649995 | myocyte enhancer factor 2C                                                 | Human myocyte enhancer factor 2C (MEF2C), transcript variant 1. mRNA (NM_002397)                                 | 1.95959                                    | down                                      | 1.70027                                    | down                                      | 169.57979                      | 384.67180           | 155.37459                      | 242.54076           | Detected                   | Detected        | Detected                   | Detected        |
| 7  | A.23.P23223   | KLF4        | Hs.376206 | Kruppel-like factor 4 (gta)                                                | Human Kruppel-like factor 4 (gta) (KLF4), mRNA (NM_004295)                                                       | 1.02345                                    | down                                      | 1.00169                                    | down                                      | 652.56530                      | 691.54694           | 832.71185                      | 735.51825           | Detected                   | Detected        | Detected                   | Detected        |
| 8  | A.23.P342709  | FBXO15      | Hs.664011 | F-box protein 15                                                           | Human F-box protein 15 (FBXO15), transcript variant 1. mRNA (NM_153576)                                          | 2.60037                                    | up                                        | 2.41878                                    | up                                        | 78.46852                       | 31.84416            | 75.18104                       | 27.40072            | Detected                   | Detected        | Detected                   | Detected        |
| 9  | A.23.P34700   | TNNI2       | Hs.533813 | troponin T type 2 (cardiac)                                                | Human troponin T type 2 (cardiac) (TNNI2), transcript variant 1. mRNA (NM_000064)                                | 2.09040                                    | down                                      | 1.32848                                    | down                                      | 28.24185                       | 61.13021            | 12.93388                       | 15.15124            | Detected                   | Detected        | Compromised                | Compromised     |
| 10 | A.23.P366376  | TDGF1       | Hs.385870 | teratocarcinoma-derived growth factor 1                                    | Human teratocarcinoma-derived growth factor 1 (TDGF1), mRNA (NM_002112)                                          | 1.72332                                    | down                                      | 2.56912                                    | up                                        | 5.63538                        | 10.05583            | 7.38659                        | 2.53227             | Compromised                | Compromised     | Compromised                | Compromised     |
| 11 | A.23.P380526  | DPPA4       | Hs.317659 | developmental pluripotency associated 4                                    | Human developmental pluripotency associated 4 (DPPA4), mRNA (NM_018189)                                          | 1.30213                                    | down                                      | 1.17999                                    | down                                      | 2.62040                        | 3.53308             | 2.85058                        | 2.96604             | Compromised                | Compromised     | Compromised                | Compromised     |
| 12 | A.23.P395582  | ZFP42       | Hs.335787 | zinc finger protein 42 homolog (mouse)                                     | Human zinc finger protein 42 homolog (mouse) (ZFP42), mRNA (NM_174995)                                           | 1.26799                                    | down                                      | 3.52599                                    | up                                        | 2.37460                        | 3.11772             | 10.32920                       | 2.58316             | Compromised                | Compromised     | Compromised                | Compromised     |
| 13 | A.23.P401055  | SOX2        | Hs.518438 | SRY (sex determining region Y)-box 2                                       | Human SRY (sex determining region Y)-box 2 (SOX2), mRNA (NM_001016)                                              | 1.27169                                    | down                                      | 1.17703                                    | down                                      | 2.28901                        | 3.01412             | 2.38275                        | 2.47306             | Compromised                | Compromised     | Compromised                | Compromised     |
| 14 | A.23.P405885  | DPPA2       | Hs.351113 | developmental pluripotency associated 2                                    | Human developmental pluripotency associated 2 (DPPA2), mRNA (NM_138113)                                          | 1.27124                                    | down                                      | 1.03344                                    | down                                      | 2.37853                        | 3.12827             | 2.87285                        | 2.61798             | Compromised                | Compromised     | Compromised                | Compromised     |
| 15 | A.23.P46894   | CHAT        | Hs.302002 | choline acetyltransferase                                                  | Human choline acetyltransferase (CHAT), transcript variant M. mRNA (NM_020549)                                   | 1.18237                                    | down                                      | 1.03032                                    | up                                        | 58.58826                       | 71.73039            | 20.01846                       | 17.13267            | Detected                   | Detected        | Detected                   | Detected        |
| 16 | A.23.P59138   | POU5F1      | Hs.249184 | POU class 5 homeobox 1                                                     | Human POU class 5 homeobox 1 (POU5F1), transcript variant 1. mRNA (NM_002701)                                    | 2.94692                                    | up                                        | 2.98804                                    | up                                        | 665.32104                      | 233.77395           | 520.54330                      | 153.08511           | Detected                   | Detected        | Detected                   | Detected        |
| 17 | A.23.P59738   | MYL7        | Hs.75636  | myosin, light chain 7, regulatory                                          | Human myosin, light chain 7, regulatory (MYL7), mRNA (NM_027253)                                                 | 1.27226                                    | down                                      | 1.24645                                    | down                                      | 36.03686                       | 47.51137            | 20.32652                       | 22.34098            | Detected                   | Detected        | Detected                   | Detected        |
| 18 | A.23.P72817   | GDF3        | Hs.86232  | growth differentiation factor 3                                            | Human growth differentiation factor 3 (GDF3), mRNA (NM_020654)                                                   | 1.31792                                    | up                                        | 1.15925                                    | down                                      | 5.28466                        | 4.15205             | 3.59586                        | 3.67574             | Compromised                | Compromised     | Compromised                | Compromised     |
| 19 | A.23.P73632   | NROB1       | Hs.286490 | nuclear receptor subfamily 0 group B, member 1                             | Human nuclear receptor subfamily 0 group B, member 1 (NROB1), mRNA (NM_009475)                                   | 6.53813                                    | up                                        | 6.99447                                    | up                                        | 257.53006                      | 40.78642            | 306.05145                      | 38.58382            | Detected                   | Detected        | Detected                   | Detected        |
| 20 | A.23.P74895   | LN28        | Hs.86154  | lin-28 homolog (C. elegans)                                                | Human lin-28 homolog (C. elegans) (LN28), mRNA (NM_024614)                                                       | 1.52183                                    | up                                        | 2.08789                                    | down                                      | 22.24938                       | 15.13858            | 4.23973                        | 7.80570             | Detected                   | Detected        | Compromised                | Compromised     |
| 21 | A.23.P95594   | NAT1        | Hs.591847 | N-acetyltransferase 1 (arylamine N-acetyltransferase)                      | Human N-acetyltransferase 1 (arylamine N-acetyltransferase) (NAT1), transcript variant 5. mRNA (NM_000662)       | 1.31388                                    | down                                      | 1.27421                                    | down                                      | 591.03156                      | 804.14450           | 529.49400                      | 594.93370           | Detected                   | Detected        | Detected                   | Detected        |
| 22 | A.24.P141227  | LMX1B       | Hs.129133 | LIM homeobox transcription factor 1, beta                                  | Human LIM homeobox transcription factor 1, beta (LMX1B), mRNA (NM_002316)                                        | 1.02012                                    | up                                        | 1.89265                                    | down                                      | 12.01103                       | 12.19164            | 3.88598                        | 6.48542             | Compromised                | Compromised     | Compromised                | Compromised     |
| 23 | A.24.P282383  | MYH7        | Hs.678918 | myosin, heavy chain 7, cardiac muscle, beta                                | Human myosin, heavy chain 7, cardiac muscle, beta (MYH7), mRNA (NM_000237)                                       | 1.31048                                    | down                                      | 1.25126                                    | down                                      | 2.59871                        | 3.52632             | 2.84199                        | 3.13572             | Compromised                | Compromised     | Compromised                | Compromised     |
| 24 | A.24.P314585  | ERAS        | Hs.447330 | ES cell expressed Ras                                                      | Human ES cell expressed Ras (ERAS), mRNA (NM_181332)                                                             | 1.14202                                    | up                                        | 1.31809                                    | up                                        | 11.08622                       | 10.05175            | 9.40884                        | 6.29443             | Compromised                | Compromised     | Compromised                | Compromised     |
| 25 | A.24.P355720  | FGF4        | Hs.1755   | fibroblast growth factor 4                                                 | Human fibroblast growth factor 4 (FGF4), mRNA (NM_000697)                                                        | 1.12486                                    | down                                      | 1.17092                                    | down                                      | 32.74595                       | 38.14063            | 12.24211                       | 12.64010            | Detected                   | Detected        | Compromised                | Compromised     |
| 26 | A.32.P233990  | DPPA5       | Hs.125531 | developmental pluripotency associated 5                                    | Human developmental pluripotency associated 5 (DPPA5), mRNA (NM_001020390)                                       | 1.33378                                    | down                                      | 1.17393                                    | down                                      | 2.69710                        | 3.72490             | 3.03895                        | 3.14580             | Compromised                | Compromised     | Compromised                | Compromised     |
| 27 | A.33.P3214665 | MAP2        | Hs.388281 | microtubule-associated protein 2                                           | Human microtubule-associated protein 2 (MAP2), transcript variant 1. mRNA (NM_002374)                            | 1.10565                                    | down                                      | 1.07913                                    | down                                      | 1285.73000                     | 1471.96940          | 1054.59330                     | 1003.51416          | Detected                   | Detected        | Detected                   | Detected        |
| 28 | A.33.P3217719 | TLE1        | Hs.197320 | transducin-like enhancer of split 1 (Ets1) homolog (Drosophila)            | Human transducin-like enhancer of split 1 (Ets1) homolog (Drosophila) (TLE1), mRNA (NM_005077)                   | 1.35853                                    | down                                      | 1.01156                                    | up                                        | 325.97156                      | 458.54380           | 222.32104                      | 193.80008           | Detected                   | Detected        | Detected                   | Detected        |
| 29 | A.33.P3294217 | UTF1        | Hs.458406 | undifferentiated embryonic cell transcription factor 1                     | Human undifferentiated embryonic cell transcription factor 1 (UTF1), mRNA (NM_003577)                            | 1.36354                                    | down                                      | 1.11815                                    | down                                      | 13114.74100                    | 18516.54100         | 2629.22200                     | 2592.33670          | Detected                   | Detected        | Detected                   | Detected        |
| 30 | A.33.P3296599 | NKX2-5      | Hs.54473  | NK2 transcription factor related, locus 5 (Drosophila)                     | Human NK2 transcription factor related, locus 5 (Drosophila) (NKX2-5), transcript variant 2. mRNA (NM_001166175) | 1.11610                                    | down                                      | 1.06543                                    | down                                      | 83453.80000                    | 96445.89000         | 106123.38000                   | 101573.06000        | Detected                   | Detected        | Detected                   | Detected        |
| 31 | A.33.P3300217 | MYLK3       | Hs.130465 | myosin light chain kinase 3                                                | Human myosin light chain kinase 3 (MYLK3), mRNA (NM_182461)                                                      | 1.06937                                    | up                                        | 1.00590                                    | up                                        | 3.33003                        | 3.22442             | 3.13806                        | 2.70589             | Compromised                | Compromised     | Compromised                | Compromised     |
| 32 | A.33.P3303712 | SLC6A3      | Hs.406    | solute carrier family 6 (neurotransmitter transporter, dopamine), member 3 | Human solute carrier family 6 (neurotransmitter transporter, dopamine), member 3 (SLC6A3), mRNA (NM_001044)      | 1.47399                                    | down                                      | 3.54998                                    | down                                      | 203.10928                      | 309.99643           | 164.00641                      | 513.39600           | Detected                   | Detected        | Detected                   | Detected        |
| 33 | A.33.P3312682 | REXO1       | Hs.192477 | REX1, RNA exosome 1 homolog (S. cerevisiae)                                | Human REX1, RNA exosome 1 homolog (S. cerevisiae) (REXO1), mRNA (NM_020868)                                      | 1.38441                                    | down                                      | 1.33395                                    | down                                      | 58889.76500                    | 84418.44500         | 23861.44300                    | 23067.45000         | Detected                   | Detected        | Detected                   | Detected        |
| 34 | A.33.P3359004 | DDC         | Hs.359988 | dopa decarboxylase (aromatic L- amino acid decarboxylase)                  | Human dopa decarboxylase (aromatic L- amino acid decarboxylase) (DDC), transcript variant 1. mRNA (NM_001242890) | 1.27307                                    | down                                      | 1.16312                                    | down                                      | 2.39509                        | 3.14406             | 2.56508                        | 2.63082             | Compromised                | Compromised     | Compromised                | Compromised     |
| 35 | A.33.P3359508 | DNMT3B      | Hs.713611 | DNA (cytosine-5)-methyltransferase 3 beta                                  | Human DNA (cytosine-5)-methyltransferase 3 beta (DNMT3B), transcript variant 1. mRNA (NM_001005372)              | 2.34031                                    | down                                      | 2.10028                                    | up                                        | 2.66052                        | 6.44722             | 7.67818                        | 3.22364             | Compromised                | Compromised     | Compromised                | Compromised     |
| 36 | A.33.P3367636 | DBP/ZZ1     | Hs.128326 | chromosome 6 open reading frame 221                                        | Human chromosome 6 open reading frame 221 (DBP/ZZ1), mRNA (NM_001077361)                                         | 20.27000                                   | up                                        | 22.70337                                   | up                                        | 109.27738                      | 5.58226             | 82.21005                       | 3.19301             | Detected                   | Compromised     | Detected                   | Compromised     |
| 37 | A.33.P3631022 | LOC10027066 | Hs.333720 | hypothetical LOC100270660                                                  | Human D-MYC proto-oncogene regulatory region (A2) (LOC100270660)                                                 | 1.74879                                    | up                                        | 1.20201                                    | down                                      | 14.60249                       | 8.65605             | 3.97881                        | 4.21723             | Detected                   | Compromised     | Compromised                | Compromised     |
