# Supplementary material for: Lactic Acid Bacteria Convert Human Fibroblasts to Multipotent Cells
Source: PubMed Central journal article supplement (PMC3530539; doi:10.1371/journal.pone.0051866), 2012-12-26
Supplement: pone.0051866.s014.pdf [file pone.0051866.s014.pdf]

Table S5: List of 50 genes that is decreased by a factor of fifteen or more at least between LAB-incorporated cell clusters-1 vs HDF-1 or LAB-incorporated cell clusters-2 vs HDF-2 and has a GO term [development]

| no | ProbeName     | GeneSymbol | UniGeneID | GeneName                                                                          | Description                                                                                                              | Fold change [LAB-inc. cells-1] vs [HDF-1] | Regulation [LAB-inc. cells-1] vs [HDF-1] | Fold change [LAB-inc. cells-2] vs [HDF-2] | Regulation [LAB-inc. cells-2] vs [HDF-2] |
|----|---------------|------------|-----------|-----------------------------------------------------------------------------------|--------------------------------------------------------------------------------------------------------------------------|-------------------------------------------|------------------------------------------|-------------------------------------------|------------------------------------------|
| 1  | A_23_P307310  | ACAN       | Hs.2159   | aggrecan                                                                          | Homo sapiens aggrecan (ACAN), transcript variant 2, mRNA [NM_013227]                                                     | 1.17244                                   | down                                     | 37.48496                                  | down                                     |
| 2  | A_23_P27013   | HOXB9      | Hs.463350 | homeobox B9                                                                       | Homo sapiens homeobox B9 (HOXB9), mRNA [NM_024017]                                                                       | 6.62605                                   | down                                     | 30.84917                                  | down                                     |
| 3  | A_33_P3377519 | HOXA6      | Hs.679517 | homeobox A6                                                                       | Homo sapiens homeobox A6 (HOXA6), mRNA [NM_024014]                                                                       | 7.97321                                   | down                                     | 34.13733                                  | down                                     |
| 4  | A_23_P301942  | NPPC       | Hs.247916 | natriuretic peptide precursor C                                                   | Homo sapiens natriuretic peptide precursor C (NPPC), mRNA [NM_024409]                                                    | 11.58496                                  | down                                     | 42.84185                                  | down                                     |
| 5  | A_23_P93772   | HOXA5      | Hs.655218 | homeobox A5                                                                       | Homo sapiens homeobox A5 (HOXA5), mRNA [NM_019102]                                                                       | 19.32321                                  | down                                     | 31.22134                                  | down                                     |
| 6  | A_23_P155969  | PLK4       | Hs.172052 | polo-like kinase 4 (Drosophila)                                                   | Homo sapiens polo-like kinase 4 (Drosophila) (PLK4), mRNA [NM_014264]                                                    | 20.70854                                  | down                                     | 40.33532                                  | down                                     |
| 7  | A_23_P46039   | FCRLA      | Hs.266331 | Fc receptor-like A                                                                | Homo sapiens Fc receptor-like A (FCRLA), mRNA [NM_032738]                                                                | 20.82261                                  | down                                     | 36.28435                                  | down                                     |
| 8  | A_23_P213336  | FGF1       | Hs.483635 | fibroblast growth factor 1 (acidic)                                               | Homo sapiens fibroblast growth factor 1 (acidic) (FGF1), transcript variant 1, mRNA [NM_000800]                          | 21.22867                                  | down                                     | 42.34012                                  | down                                     |
| 9  | A_23_P389897  | NGFR       | Hs.415768 | nerve growth factor receptor (TNFR superfamily, member 16)                        | Homo sapiens nerve growth factor receptor (TNFR superfamily, member 16) (NGFR), mRNA [NM_002507]                         | 23.03998                                  | down                                     | 30.64351                                  | down                                     |
| 10 | A_23_P96158   | KRT17      | Hs.2785   | keratin 17                                                                        | Homo sapiens keratin 17 (KRT17), mRNA [NM_000422]                                                                        | 30.95973                                  | down                                     | 18.17780                                  | down                                     |
| 11 | A_23_P107283  | HOXB2      | Hs.514289 | homeobox B2                                                                       | Homo sapiens homeobox B2 (HOXB2), mRNA [NM_002145]                                                                       | 31.19959                                  | down                                     | 31.77469                                  | down                                     |
| 12 | A_23_P501538  | HOXA3      | Hs.659337 | homeobox A3                                                                       | Homo sapiens homeobox A3 (HOXA3), transcript variant 2, mRNA [NM_153631]                                                 | 33.35369                                  | down                                     | 18.09414                                  | down                                     |
| 13 | A_23_P58321   | CCNA2      | Hs.58974  | cyclin A2                                                                         | Homo sapiens cyclin A2 (CCNA2), mRNA [NM_001237]                                                                         | 33.80436                                  | down                                     | 39.61835                                  | down                                     |
| 14 | A_23_P157136  | SCIN       | Hs.655515 | scinderin                                                                         | Homo sapiens scinderin (SCIN), transcript variant 2, mRNA [NM_033128]                                                    | 35.78193                                  | down                                     | 7.72451                                   | down                                     |
| 15 | A_23_P215454  | ELN        | Hs.647061 | elastin                                                                           | Homo sapiens elastin (ELN), transcript variant 1, mRNA [NM_000501]                                                       | 37.86731                                  | down                                     | 52.46331                                  | down                                     |
| 16 | A_23_P167159  | SORG1      | Hs.7122   | stimulator of chondrogenesis 1                                                    | Homo sapiens stimulator of chondrogenesis 1 (SORG1), mRNA [NM_007281]                                                    | 39.33724                                  | down                                     | 24.93944                                  | down                                     |
| 17 | A_23_P373521  | HAND2      | Hs.388245 | heart and neural crest derivatives expressed 2                                    | Homo sapiens heart and neural crest derivatives expressed 2 (HAND2), mRNA [NM_021973]                                    | 41.60090                                  | down                                     | 32.86138                                  | down                                     |
| 18 | A_23_P100127  | CASC5      | Hs.181855 | cancer susceptibility candidate 5                                                 | Homo sapiens cancer susceptibility candidate 5 (CASC5), transcript variant 1, mRNA [NM_170589]                           | 42.70049                                  | down                                     | 49.23346                                  | down                                     |
| 19 | A_23_P122197  | CCNB1      | Hs.23960  | cyclin B1                                                                         | Homo sapiens cyclin B1 (CCNB1), mRNA [NM_031966]                                                                         | 42.74203                                  | down                                     | 44.84546                                  | down                                     |
| 20 | A_23_P146274  | STMN2      | Hs.521651 | stathmin-like 2                                                                   | Homo sapiens stathmin-like 2 (STMN2), mRNA [NM_007029]                                                                   | 43.26243                                  | down                                     | 38.34229                                  | down                                     |
| 21 | A_24_P30557   | TBX5       | Hs.381715 | T-box 5                                                                           | Homo sapiens T-box 5 (TBX5), transcript variant 1, mRNA [NM_000192]                                                      | 45.04174                                  | down                                     | 37.62053                                  | down                                     |
| 22 | A_33_P3330149 | PAX6       | Hs.270303 | paired box 6                                                                      | Homo sapiens paired box 6 (PAX6), transcript variant 1, mRNA [NM_000280]                                                 | 46.52534                                  | down                                     | 30.35840                                  | down                                     |
| 23 | A_24_P416370  | HOXB4      | Hs.664706 | homeobox B4                                                                       | Homo sapiens homeobox B4 (HOXB4), mRNA [NM_024015]                                                                       | 48.99025                                  | down                                     | 75.59501                                  | down                                     |
| 24 | A_23_P163567  | SMPD3      | Hs.368421 | sphingomyelin phosphodiesterase 3, neutral membrane (neutral sphingomyelinase II) | Homo sapiens sphingomyelin phosphodiesterase 3, neutral membrane (neutral sphingomyelinase II) (SMPD3), mRNA [NM_018667] | 49.28304                                  | down                                     | 25.49599                                  | down                                     |
| 25 | A_23_P24129   | DKK1       | Hs.40499  | dickkopf homolog 1 (Xenopus laevis)                                               | Homo sapiens dickkopf homolog 1 (Xenopus laevis) (DKK1), mRNA [NM_012242]                                                | 49.39177                                  | down                                     | 47.39847                                  | down                                     |
| 26 | A_23_P423237  | SGCG       | Hs.37167  | sarcoglycan, gamma (35kDa dystrophin-associated glycoprotein)                     | Homo sapiens sarcoglycan, gamma (35kDa dystrophin-associated glycoprotein) (SGCG), mRNA [NM_000231]                      | 50.23103                                  | down                                     | 13.21567                                  | down                                     |
| 27 | A_23_P210176  | ITGA6      | Hs.133397 | integrin, alpha 6                                                                 | Homo sapiens integrin, alpha 6 (ITGA6), transcript variant 2, mRNA [NM_000210]                                           | 53.34168                                  | down                                     | 45.93769                                  | down                                     |
| 28 | A_23_P212844  | TACC3      | Hs.104019 | transforming, acidic coiled-coil containing protein 3                             | Homo sapiens transforming, acidic coiled-coil containing protein 3 (TACC3), mRNA [NM_006342]                             | 53.95437                                  | down                                     | 50.58793                                  | down                                     |
| 29 | A_33_P3377529 | HOXA4      | Hs.533357 | homeobox A4                                                                       | Homo sapiens homeobox A4 (HOXA4), mRNA [NM_002141]                                                                       | 57.78450                                  | down                                     | 98.33543                                  | down                                     |
| 30 | A_23_P52017   | ASPM       | Hs.121028 | asp (abnormal spindle) homolog, microcephaly associated (Drosophila)              | Homo sapiens asp (abnormal spindle) homolog, microcephaly associated (Drosophila) (ASPM), mRNA [NM_018136]               | 65.81075                                  | down                                     | 70.01885                                  | down                                     |
| 31 | A_23_P318511  | HOXB3      | Hs.654560 | homeobox B3                                                                       | Homo sapiens homeobox B3 (HOXB3), mRNA [NM_002146]                                                                       | 65.99564                                  | down                                     | 33.93036                                  | down                                     |
| 32 | A_23_P215634  | IGFBP3     | Hs.450230 | insulin-like growth factor binding protein 3                                      | Homo sapiens insulin-like growth factor binding protein 3 (IGFBP3), transcript variant 1, mRNA [NM_001013398]            | 67.36516                                  | down                                     | 66.17660                                  | down                                     |
| 33 | A_23_P65757   | CCNB2      | Hs.194698 | cyclin B2                                                                         | Homo sapiens cyclin B2 (CCNB2), mRNA [NM_004701]                                                                         | 71.74918                                  | down                                     | 79.26724                                  | down                                     |
| 34 | A_23_P370588  | HOXB8      | Hs.514292 | homeobox B8                                                                       | Homo sapiens homeobox B8 (HOXB8), mRNA [NM_024016]                                                                       | 76.56639                                  | down                                     | 23.89782                                  | down                                     |
| 35 | A_33_P3421243 | AFP        | Hs.518808 | alpha-fetoprotein                                                                 | Homo sapiens alpha-fetoprotein (AFP), mRNA [NM_001134]                                                                   | 91.34399                                  | down                                     | 55.39948                                  | down                                     |
| 36 | A_23_P55281   | HOXB7      | Hs.436181 | homeobox B7                                                                       | Homo sapiens homeobox B7 (HOXB7), mRNA [NM_004502]                                                                       | 98.93823                                  | down                                     | 44.19750                                  | down                                     |
| 37 | A_24_P218805  | HOXC10     | Hs.44276  | homeobox C10                                                                      | Homo sapiens homeobox C10 (HOXC10), mRNA [NM_017409]                                                                     | 116.49500                                 | down                                     | 100.85654                                 | down                                     |
| 38 | A_23_P25150   | HOXC9      | Hs.658823 | homeobox C9                                                                       | Homo sapiens homeobox C9 (HOXC9), mRNA [NM_006897]                                                                       | 122.49983                                 | down                                     | 222.03098                                 | down                                     |
| 39 | A_24_P264943  | COMP       | Hs.1584   | cartilage oligomeric matrix protein                                               | Homo sapiens cartilage oligomeric matrix protein (COMP), mRNA [NM_000095]                                                | 126.96592                                 | down                                     | 201.15356                                 | down                                     |
| 40 | A_33_P3300975 | HOXC4      | Hs.549040 | homeobox C4                                                                       | Homo sapiens homeobox C4 (HOXC4), transcript variant 1, mRNA [NM_014620]                                                 | 131.16129                                 | down                                     | 304.63330                                 | down                                     |
| 41 | A_33_P3264528 | HOXA11     | Hs.249171 | homeobox A11                                                                      | Homo sapiens homeobox A11 (HOXA11), mRNA [NM_005523]                                                                     | 135.72766                                 | down                                     | 157.62318                                 | down                                     |
| 42 | A_23_P374695  | TEK        | Hs.89640  | TEK tyrosine kinase, endothelial                                                  | Homo sapiens TEK tyrosine kinase, endothelial (TEK), mRNA [NM_000459]                                                    | 168.16338                                 | down                                     | 99.82339                                  | down                                     |
| 43 | A_23_P7313    | SPP1       | Hs.313    | secreted phosphoprotein 1                                                         | Homo sapiens secreted phosphoprotein 1 (SPP1), transcript variant 1, mRNA [NM_001040058]                                 | 170.12749                                 | down                                     | 197.49605                                 | down                                     |
| 44 | A_24_P77904   | HOXA10     | Hs.110637 | homeobox A10                                                                      | Homo sapiens homeobox A10 (HOXA10), transcript variant 1, mRNA [NM_018951]                                               | 212.57760                                 | down                                     | 101.90968                                 | down                                     |
| 45 | A_33_P3300965 | HOXC6      | Hs.549040 | homeobox C6                                                                       | Homo sapiens homeobox C6 (HOXC6), transcript variant 2, mRNA [NM_153693]                                                 | 247.46118                                 | down                                     | 651.67040                                 | down                                     |
| 46 | A_23_P66682   | HOXB6      | Hs.98428  | homeobox B6                                                                       | Homo sapiens homeobox B6 (HOXB6), mRNA [NM_018952]                                                                       | 385.91574                                 | down                                     | 1998.17210                                | down                                     |
| 47 | A_23_P363316  | HOXB5      | Hs.654456 | homeobox B5                                                                       | Homo sapiens homeobox B5 (HOXB5), mRNA [NM_002147]                                                                       | 489.89343                                 | down                                     | 455.47385                                 | down                                     |
| 48 | A_23_P70968   | HOXA7      | Hs.660918 | homeobox A7                                                                       | Homo sapiens homeobox A7 (HOXA7), mRNA [NM_006896]                                                                       | 547.44600                                 | down                                     | 274.53156                                 | down                                     |
| 49 | A_23_P500998  | HOXA9      | Hs.659350 | homeobox A9                                                                       | Homo sapiens homeobox A9 (HOXA9), mRNA [NM_152739]                                                                       | 592.35516                                 | down                                     | 493.90430                                 | down                                     |
| 50 | A_24_P124558  | HOXC8      | Hs.664500 | homeobox C8                                                                       | Homo sapiens homeobox C8 (HOXC8), mRNA [NM_022658]                                                                       | 594.18225                                 | down                                     | 534.99910                                 | down                                     |
